# Supplementary material
Source: PubMed Central journal article supplement (PMC2780798)
Supplement: 0908958106_Appendix_PDF.pdf [file 0908958106_Appendix_PDF.pdf]

**Fig. S1.** Mechanism of Edman degradation and *in silico* analysis of N-CLAP peptides derived from the N termini of human proteins.

(A) Schematic of the chemoselective reactions in Edman degradation. Amine groups in proteins are modified by PITC, resulting in the incorporation of PITC at the N terminus and  $\epsilon$ -amines of lysines. The residues in the peptide from the second amino acid are denoted as  $X_2 \times 3 \dots X_n$ . TFA treatment of the PITC-modified peptide results in an intramolecular cyclization in which the thiourea of the PITC adduct reacts with the carbonyl component of the first peptide bond. This cyclization releases PITC conjugated to the first amino acid, forming a new N-terminal amine while maintaining  $\epsilon$ -amines blocked.

(B) Theoretical distribution of the length of predicted human N-CLAP peptides after *in silico* trypsin digestion. Trypsin cleaves only after arginine in PITC-modified proteins, since this treatment modifies the charge and size of the lysine side chain. Thus, digestion of proteins processed through the N-CLAP protocol provides a digestion pattern that is identical to Arg-C. To assess the size distribution of potential N-CLAP peptides, the human protein database and its annotation of N-terminal signal peptides were downloaded from Swiss-Prot database (v55.6, July 1, 2008). Redundant sequences were removed by an in-house computer code. The signal peptides were also removed according to the annotation in Swiss-Prot database before performing *in silico* analysis of the N-CLAP peptides. The starting N-terminal amino acid of the proteins was further removed, because the N-terminal amino acid is cleaved during the N-CLAP procedure. Shown is the frequency of peptides generated after a virtual N-CLAP protocol of the indicated length. As can be seen, a significant fraction of virtual N-CLAP peptides are five amino acids or longer.

(C) Cumulative fraction of N-CLAP peptides for the human proteome. The results in A are presented to show the cumulative fraction of peptides of the indicated length or smaller. Peptides that are between five and 40 aa in length are shown in the shaded area. A significant portion (65%) of N-CLAP peptides could be a suitable size for MS/MS analysis.

(D) The fraction of unique N-CLAP peptides as a function of peptide length in the human proteome. For peptides of each indicated length, we determined how many of them can be assigned to a single protein. This is indicated as the fraction of unique N-CLAP peptides. As shown, for peptides that are four amino acids, 36% can be assigned to a unique protein. For peptides that are five amino acids or longer, 68.2% are unique (denoted by the dashed line). Most of the peptides that match to more than one protein are matched to highly similar members of a protein family. The high uniqueness of the N-terminal peptides in different organisms was also discussed by Wilkin and coworkers when a small database was used [Wilkins MR, et al. (1998) *J Mol Biol* 278:599-608]. These results support the hypothesis that the N-CLAP peptides could be used for protein identification in a high-throughput fashion. However, due to the nonuniqueness of some N-CLAP peptides, biochemical validation would be needed in some cases to confirm that a specific protein corresponds to a given N-CLAP peptide.

(E) The theoretical percentage of N-terminal peptides with less than five amino acids when different enzymes are used for theoretical digestion of proteins in the human proteome. When peptides are smaller than five amino acids, they typically have too many potential matches to be useful for parent protein identification. When a virtual trypsin digestion is performed on a lysate, which is not modified on lysines, 26.6% are shorter than five amino acids. However, the fraction decreases when either Arg-C, or Glu-C, which cleaves after Glu, is used. However, if the datasets of a Arg-C experiment and a Glu-C experiment are combined (Arg-C $\cap$ Glu-C), then only a small fraction of proteins (3.3%) provide N-CLAP peptides that are shorter than five amino acids under both conditions. These data suggest that combining datasets could be used to improve the coverage of N-terminally derived peptides.

(F) The percentage of N-CLAP peptides with unique mass as a function of the mass accuracy for three organisms, *Homo sapiens*, *Saccharomyces cerevisiae*, and *Mycoplasma genitalium*. Theoretical N-CLAP peptides were obtained according to the method described in A using trypsin as a protease to conduct *in silico* protein digestion. Indicated in parentheses are the numbers of full length protein sequences downloaded from Swiss-Prot database for each proteome. As the mass accuracy increases, the percentage of N-CLAP peptides that are found to match mass that uniquely identifies the parent protein increases. For example, in the human

proteome, when the mass accuracy is 1 ppm, >31% N-CLAP peptides have unique masses. However, when the mass accuracy decreases to 20 ppm, only 10% N-CLAP peptides have unique masses. The size of the proteome is another major factor which affects the percentage of N-CLAP peptides with unique mass. Using a mass accuracy of 10 ppm, which can be readily achieved by Q-TOF as an example, the human proteome, which contains more than 50,000 unique proteins, has about 17% N-CLAP peptides with unique masses. When the size of the proteome is reduced to 7,000 (the yeast proteome), the percentage of N-CLAP peptides with unique masses increases to 62%. The percentage of N-CLAP peptides with unique mass for the *M. genitalium* proteome, a bacterial proteome that comprises about 500 proteins, is >90%. The same trend holds true for the uniqueness of the N-CLAP peptide sequences. For the human proteome, only 68% N-CLAP peptide sequences are unique while for the yeast and bacterium proteomes, the percentages of unique N-CLAP peptide sequences are increased to 86% and 100%, respectively, when the N-CLAP peptides with a length of no less than five amino acids are analyzed. These results indicate that the N-CLAP peptides can almost completely unambiguously identify proteins for small proteomes solely based on the accurate masses of the N-CLAP peptides.

**A**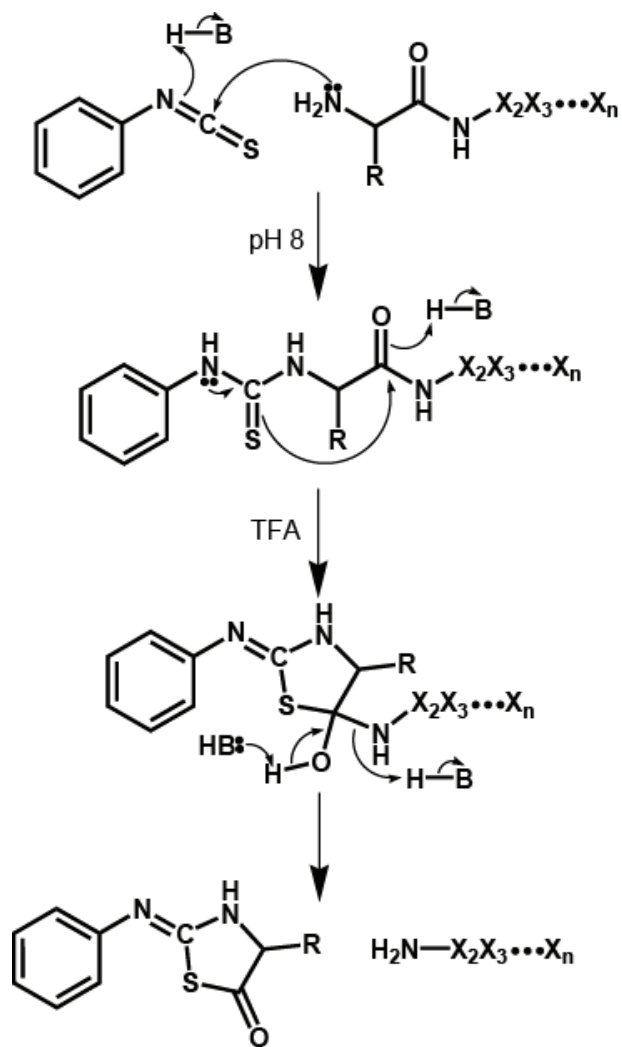**B**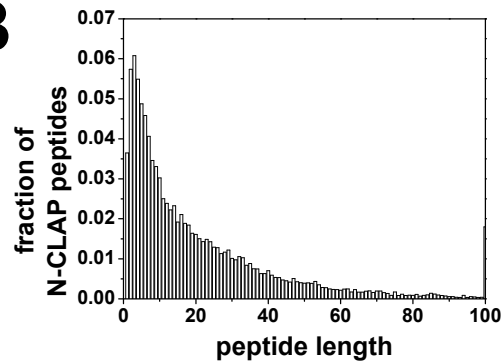**C**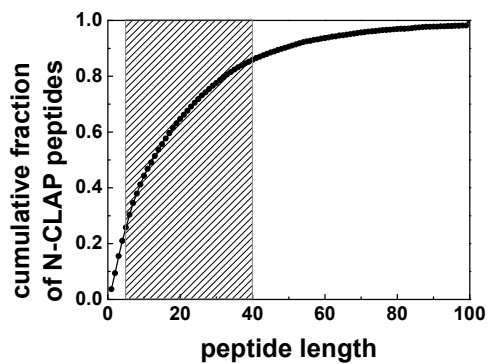**D**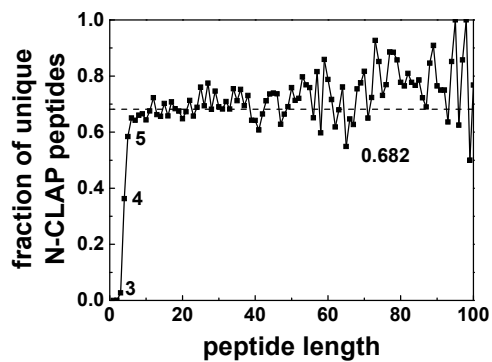**E**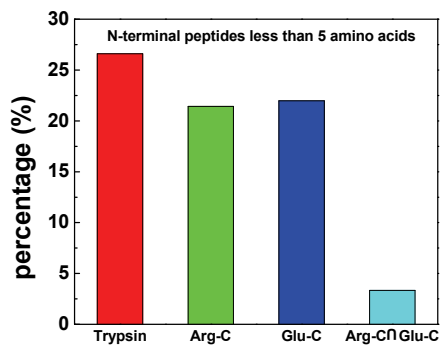**F**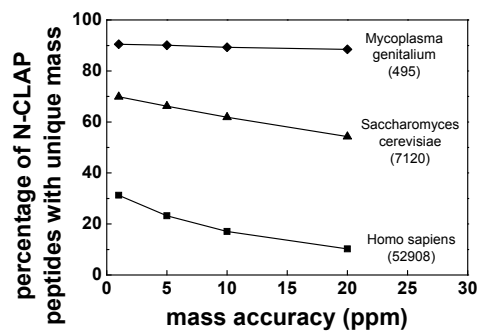



**Fig. S2.** Chemical modifications of peptides at different stages of the N-CLAP procedure. (A–F) N-CLAP was performed using a peptide derived from  $\beta$ -catenin after caspase cleavage at Asp-115 residue, which was discovered by Mahrus S, et al. (1). (G–K) Experiments using the c-Myc peptide, which has one internal lysine residue.

(A) MALDI-TOF-MS of the  $\beta$ -catenin peptide AAHPTNVQR (amino acids 116-124) results in a major peptide ion at 993.74 Da.  $\beta$ -catenin is known to be cleaved by caspases (1), and produces this internal tryptic peptide.

(B) PITC-treated  $\beta$ -catenin peptide results in a major ion reflecting the expected thiocarbamoyl PITC modification.

(C) TFA treatment of PITC-modified  $\beta$ -catenin results in a single prominent peptide ion with a mass corresponding to the  $\beta$ -catenin peptide missing the first N-terminal residue (Ala).

(D) The deblocked  $\beta$ -catenin peptide was reacted with EZ-Link Sulfo NHS-SS-biotin. MALDITOF-MS revealed a single major peak corresponding to the modified peptide.

(E) TCEP-reduced sample results in a 1,010.77 Da peptide ion, corresponding to the  $\beta$ -catenin peptide without the N-terminal Ala and with a remnant from the cleavable biotin tag.

(F) MS/MS spectrum of the  $\beta$ -catenin peptide (116-124) after N-CLAP. The peptide was detected using ESI-Q-TOF analysis with a score of 16.89 and an SPI of 88.8% by Spectrum Mill database searching. The MS/MS spectrum (i) demonstrates that the peptide contains the remnant of the cleaved N-terminal EZ-Link Sulfo NHS-SS-biotin adduct and (ii) confirms the loss of the N-terminal Ala.

(G) MS/MS spectra of the unmodified c-Myc peptide.

(H) PITC-treated c-Myc peptide. The MS/MS spectrum is consistent with two PITC modifications, with one PITC adduct on the N-terminal amine, while the other adduct is on the  $\epsilon$ -amine of the lysine in the c-Myc peptide.

(I) PITC- and TFA-treated c-Myc peptide. The MS/MS spectrum indicates a loss of the N-terminal residue, which is consistent with the TFA-mediated intramolecular cyclization that releases the first residue. The PITC adduct on the lysine remains on the peptide.

(J) PITC-, TFA- and EZ-Link-Sulfo-NHS-SS-biotin-treated c-Myc peptide. The MS/MS spectrum exhibits a shift in the *b*-ion series consistent with the N-terminal modification by the biotinylation reagent and the PITC-modified lysine. (K) PITC-, TFA-, EZ-Link-Sulfo-NHS-SS-biotin-, and TCEP-treated c-Myc peptide. The MS/MS spectrum indicates the expected cleavage of the disulfide in the biotinylation reagent. The PITC adduct on the  $\epsilon$ -amine of the lysine residue results in an uncharged amino acid adduct. Because PITC-modified lysine is not charged, complex MS/MS spectra due to the presence of internal unmodified basic residues in peptides are avoided. Additionally, the PITC modification did not impair peptide fragmentation, indicating that MS/MS spectra obtained from PITC-modified peptides can be used for peptide identification. N-terminal modifications are shown in red text and the PITC modification on lysine is indicated by an asterisk. The symbols \, /, and | represent *b* -ions, *y*-ions, and both *b*-ions and *y*-ions, respectively. The peptide sequence and modification is shown in the spectra and the *b*-ions and *y*-ions are labeled.

1. Mahrus S, et al. (2008) Global sequencing of proteolytic cleavage sites in apoptosis by specific labeling of protein N termini. *Cell* 134:866-876.

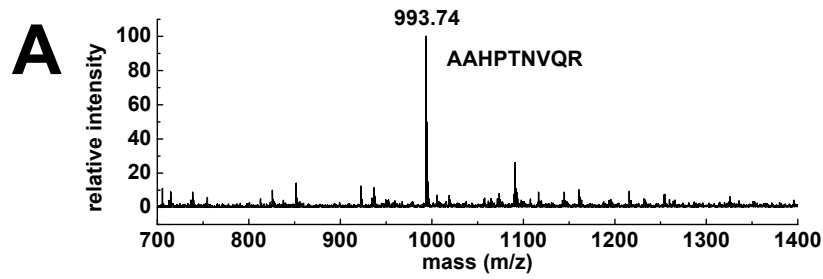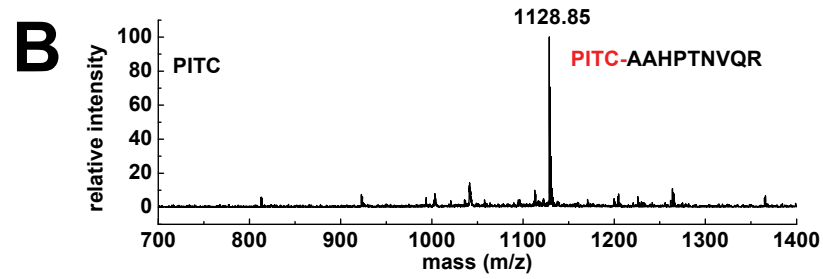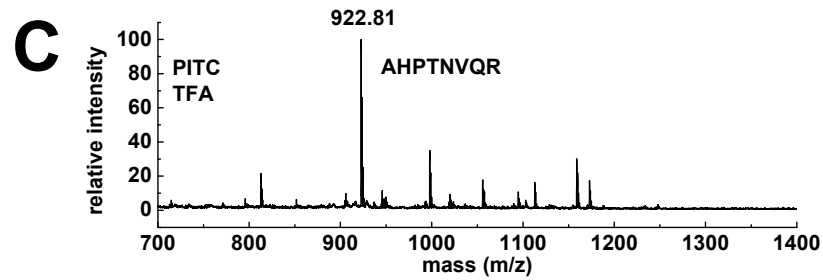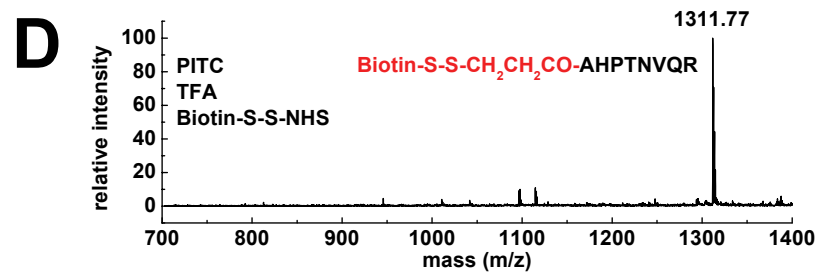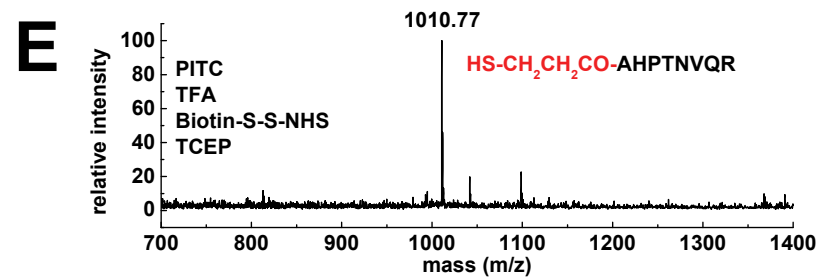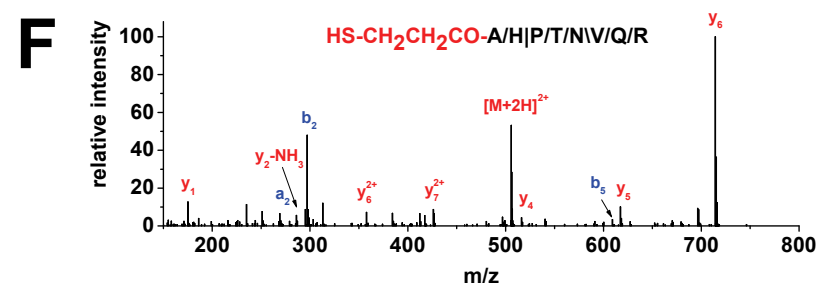

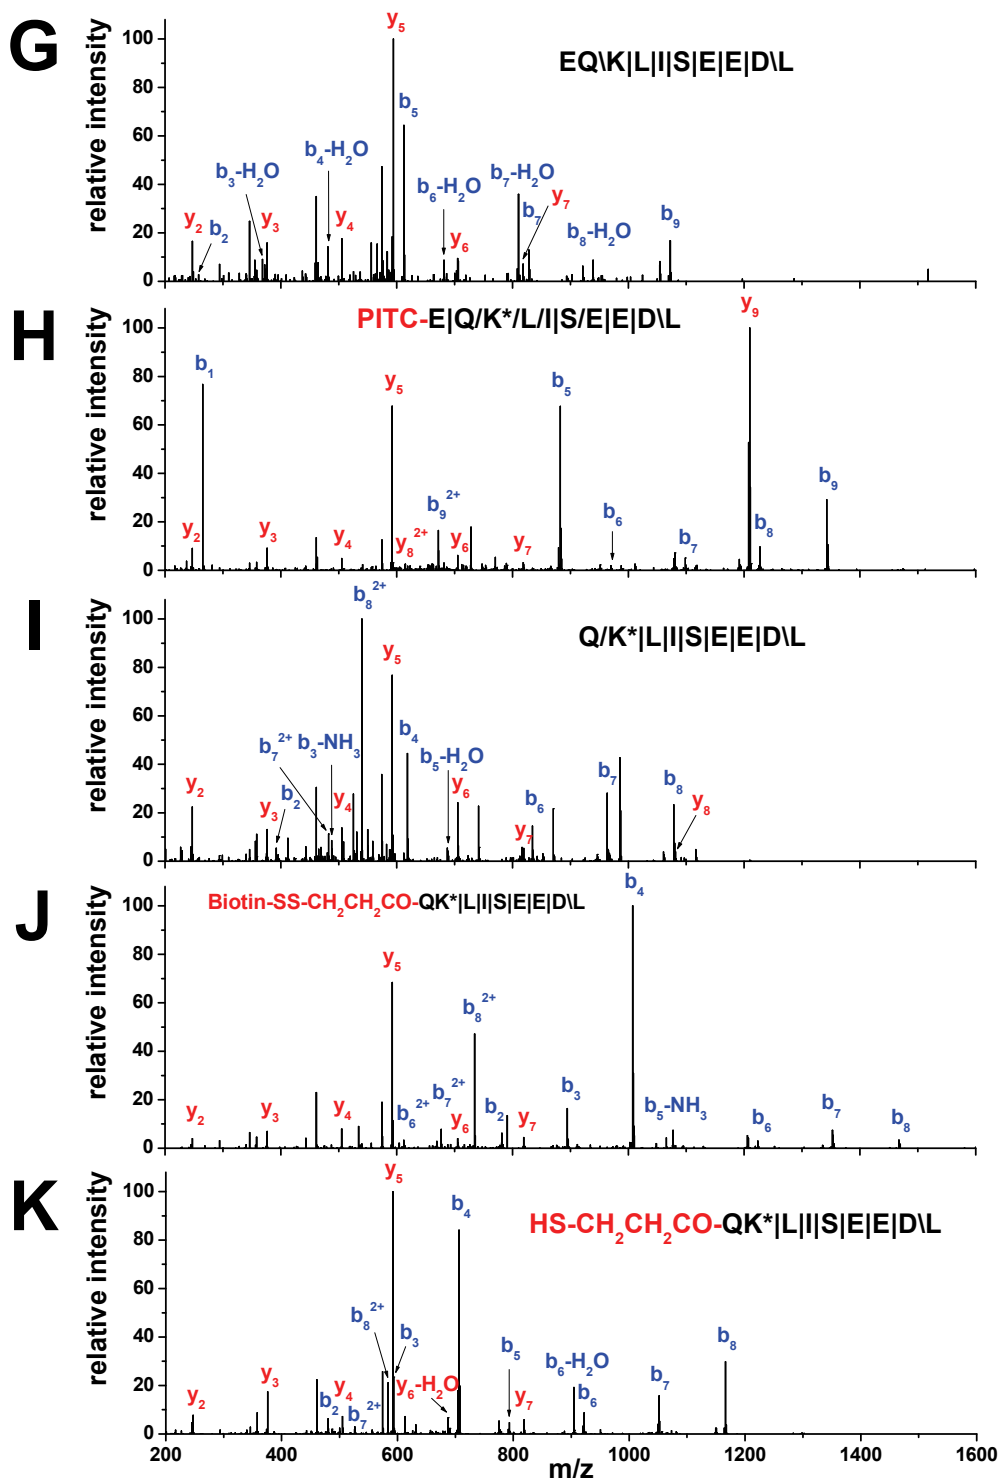

**Fig. S3.** MS/MS spectrum of neutravidin-purified and TCEP-eluted N-terminal peptide from RNase A obtained using N-CLAP.

The fragmentation pattern established the identity of the peptide and confirmed the N-terminal and lysine modification. The N-terminal modification is shown in red text and the PITC modification on lysine is indicated by an asterisk. The symbols \, /, and | represent *b*-ions, *y*-ions, and both *b*-ions and *y*-ions, respectively. The peptide sequence and modification is shown in the spectra and the *b*-ions and *y*-ions are labeled.

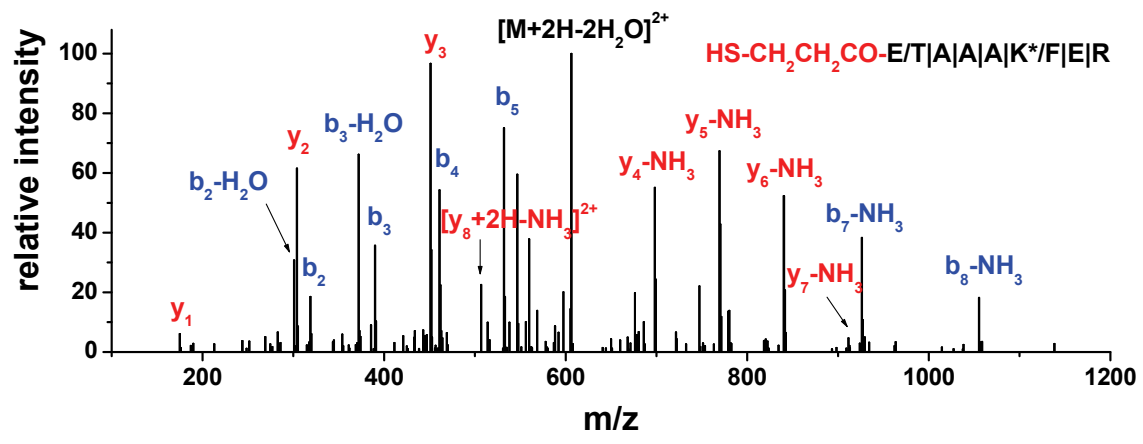

**Fig. S4.** MS/MS spectra of N-CLAP peptides identified in Jurkat T-cells.

The peptide rank, score, the percentage of assigned spectrum intensity of total spectrum intensity (SPI), sequence map, mass of precursor ion ( $MH^+$ ), precursor ion mass error ( $MH^+$  error), protein molecular weight (MW), Swiss-Prot accession number, and protein name are listed above the table. The symbols \, /, and | represent *b*-ions, *y*-ions, and both *b*-ions and *y*-ions, respectively.

The table shows the experimental MS/MS fragments and the matched theoretical MS/MS fragments as well as the peak intensity, score of each fragment, matched ions, and delta mass of the fragment deviating from its theoretical mass.

In the spectra, matched ions are shown in red vertical segments and labeled as *b* or *y*-ions, while the unmatched ions are shown in black vertical segments. Some of the red vertical segments are not labeled automatically by Spectrum Mill because of the lack of space in the spectra. The detailed information about these peaks can be obtained from the table of mass fragments.

In total, 278 N-CLAP peptides have been identified. Among them, 80 peptides are derived from the predicted protein N-termini (denoted by “N” at the beginning of the number of the spectra). These peptides comprise N-terminal peptides from proteins that exhibited either no or moderate trimming of the N terminus (e.g., up to three amino acids).

Thirty-eight (38) N-CLAP peptides are obtained from N-termini of proteins with removed signal peptides or transit peptides (denoted by “S” at the beginning of the number of the spectra).

Twenty-three (23) N-CLAP peptides are derived from caspase cleavages in Jurkat T-cells after cisplatin treatment (denoted by “C” at the beginning of the number of the spectra).

Another 137 N-CLAP peptides are identified from protein internal cleavages (denoted by “I” at the beginning of the number of the spectra). The number at the left upper corner of each spectrum corresponds to the number in Tables S1, S2, S3, and S4, respectively.

N1

Detailed Results

| Rank | Score | SP1 (%) | BC8 | # Unmatched Ions | Sequence                          | MH <sup>+</sup> Calculated (Da) | MH <sup>+</sup> Error (Da) | MH <sup>+</sup> Error (ppm) | Protein MW/pi (Da) | Species | Accession # | MS-Digest Index # | Protein Name                                                                |
|------|-------|---------|-----|------------------|-----------------------------------|---------------------------------|----------------------------|-----------------------------|--------------------|---------|-------------|-------------------|-----------------------------------------------------------------------------|
| 1    | 18.48 | 90.0    | 9   | 7/26             | (V) QVAIR(Y)MID/DVA/P G D/P/R (Q) | 1808.8410                       | 0.0141                     | 8.8                         | 21488.5/6.43       | HUMAN   | Q8BV67      | 349116            | 1,2-dihydroxy-3-keto-5-methylthiopentene dioxygenase - Homo sapiens (Human) |

  

| Fragment-Ion (m/z)      | 88.097 | 169.082 | 172.042 | 217.085 | 268.126 | 272.173 | 278.175 | 288.102 | 288.103 | 448.186 | 474.182 | 641.274 | 696.210 | 812.308 | 837.248 | 868.289 <sup>+2</sup> | 881.775 <sup>+2</sup> | 727.335 | 788.284 | 782.282 | 842.386 | 857.481 | 873.401 | 1138.487 | 1322.648 |
|-------------------------|--------|---------|---------|---------|---------|---------|---------|---------|---------|---------|---------|---------|---------|---------|---------|-----------------------|-----------------------|---------|---------|---------|---------|---------|---------|----------|----------|
| Frag. Inten. (% of TIC) | 1.03   | 0.13    | 1.06    | 5.75    | 1.92    | 19.48   | 2.99    | 8.69    | 1.03    | 3.33    | 8.44    | 11.01   | 1.09    | 2.61    | 6.52    | 1.29                  | 1.37                  | 1.75    | 1.30    | 1.48    | 3.36    | 1.10    | 5.49    | 6.61     | 1.15     |
| Rel. Inten. (% of BP)   | 5.29   | 0.55    | 5.46    | 29.53   | 9.86    | 100.00  | 15.37   | 44.61   | 5.26    | 17.12   | 43.34   | 56.52   | 5.61    | 13.40   | 33.49   | 6.64                  | 7.04                  | 9.02    | 5.68    | 7.61    | 17.26   | 5.63    | 28.18   | 33.94    | 5.89     |
| Score                   | -0.05  | 2.00    | -0.05   | 0.50    | 0.75    | 1.50    | -0.15   | 0.50    | -0.05   | 0.50    | 1.50    | 0.75    | 1.50    | 0.50    | 0.50    | -0.07                 | 1.50                  | 1.50    | 0.50    | -0.08   | 1.50    | -0.06   | 1.50    | 1.50     | 1.50     |
| Ion-type                |        | W       |         | b1      | AW      | Y2      |         | b2      |         | a3      | b3      | Y5      | YMDDA   | y6      | b6      |                       | y1 <sup>+2</sup>      |         | y7      | b5      | y8      |         | y9      | y10      | y11      |
| Delta ppm               |        | 1.4     |         | -2.5    | -0.8    | 3.2     |         | 0.2     |         | -3.0    | 0.3     | 1.5     | 11.9    | -0.8    | 1.4     |                       | -3.4                  |         | -5.0    | -2.1    |         | 0.8     |         | -3.3     | -0.4     |

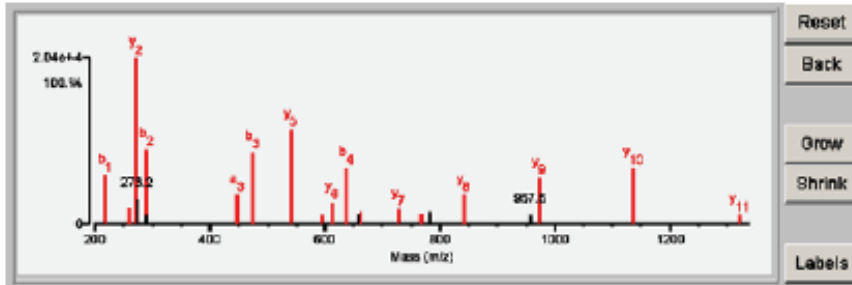

N2

Detailed Results

| Rank | Score | SP1 (%) | BC8 | # Unmatched Ions | Sequence                                | MH <sup>+</sup> Calculated (Da) | MH <sup>+</sup> Error (Da) | MH <sup>+</sup> Error (ppm) | Protein MW/pi (Da) | Species | Accession # | MS-Digest Index # | Protein Name                                                          |
|------|-------|---------|-----|------------------|-----------------------------------------|---------------------------------|----------------------------|-----------------------------|--------------------|---------|-------------|-------------------|-----------------------------------------------------------------------|
| 1    | 18.13 | 81.8    | 12  | 7/26             | (P) L I E HVAIVR(E)GALR/K/R/P D/L/R (I) | 2088.9728                       | 0.0078                     | 3.8                         | 46631.8/6.46       | HUMAN   | Q16008      | 445057            | 26S proteasome non-ATPase regulatory subunit 6 - Homo sapiens (Human) |

  

| Fragment-Ion (m/z)      | 88.097 | 175.121 | 288.203 | 316.128 | 446.170 | 488.187 | 500.281 | 630.268 | 658.286 | 814.316 | 870.276 | 887.308 | 818.330 | 838.470 | 877.430 | 881.432 | 846.389 | 874.482 | 885.484 | 1002.406 | 1061.609 | 1116.479 | 1144.582 | 1287.633 | 1273.899 |
|-------------------------|--------|---------|---------|---------|---------|---------|---------|---------|---------|---------|---------|---------|---------|---------|---------|---------|---------|---------|---------|----------|----------|----------|----------|----------|----------|
| Frag. Inten. (% of TIC) | 0.05   | 1.74    | 1.30    | 1.75    | 4.64    | 2.05    | 6.58    | 1.31    | 6.56    | 4.00    | 2.39    | 6.40    | 4.09    | 3.39    | 1.20    | 7.59    | 2.33    | 21.62   | 1.23    | 8.03     | 1.12     | 5.22     | 3.06     | 1.07     | 1.25     |
| Rel. Inten. (% of BP)   | 0.22   | 8.04    | 6.02    | 8.12    | 21.47   | 9.54    | 30.43   | 6.07    | 30.37   | 18.51   | 11.07   | 25.62   | 18.90   | 15.67   | 5.53    | 35.12   | 10.80   | 100.00  | 5.69    | 37.14    | 5.17     | 24.17    | 14.14    | 4.96     | 5.82     |
| Score                   | 0.22   | 1.50    | 1.50    | -0.08   | 0.75    | -0.10   | 1.50    | 0.50    | 1.50    | 0.25    | 0.75    | 0.50    | 0.50    | -0.16   | 1.50    | -0.35   | 0.50    | 1.50    | -0.06   | 0.50     | -0.05    | 0.50     | 1.50     | -0.05    | 1.50     |
| Ion-type                |        | L1      | y1      | y2      | b3      |         | y4      | a4      | b4      | y5      | b5-NH2  | b5      | b6      |         | y6      |         | b7      | y7      |         | b8       |          | b9       | y9       | y10      |          |
| Delta ppm               | 5.5    | 12.3    |         | -1.4    |         | -14.0   |         | -2.6    | -23.9   |         | 8.9     | 4.7     | -19.3   |         | -6.0    |         | 12.0    | 4.4     |         | -3.9     |          | -12.7    | -9.8     |          | 2.6      |

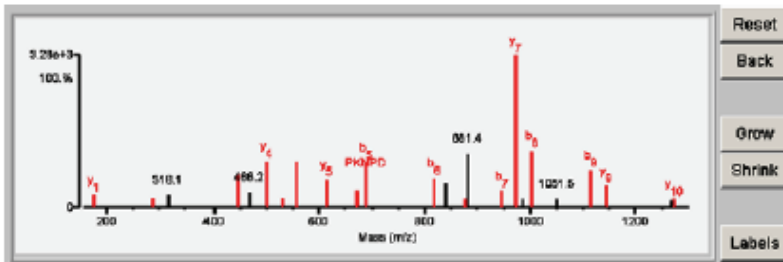



# N3

## Detailed Results

| Rank                    | Score  | SPI (%) | BCS    | # Unmatched Ions | Sequence                                          | MH <sup>+</sup> Calculated (Da) | MH <sup>+</sup> Error (Da) | MH <sup>+</sup> Error (ppm) | Protein MW/pi (Da) | Species | Accession # | MS-Digest Index # | Protein Name                                     |         |                     |         |                     |         |         |                    |         |         |         |         |         |
|-------------------------|--------|---------|--------|------------------|---------------------------------------------------|---------------------------------|----------------------------|-----------------------------|--------------------|---------|-------------|-------------------|--------------------------------------------------|---------|---------------------|---------|---------------------|---------|---------|--------------------|---------|---------|---------|---------|---------|
| 1                       | 12.29  | 71.4    | 8      | 8/25             | (P) G V V E V K D V N / N / Q / E / E / V / R (A) | 1841.8673                       | 0.0069                     | 3.8                         | 16060.6/10.31      | HUMAN   | P39019      | 559683            | 40S ribosomal protein S19 - Homo sapiens (Human) |         |                     |         |                     |         |         |                    |         |         |         |         |         |
| Fragment-ion (m/z)      | 70.065 | 72.081  | 84.081 | 86.096           | 94.065                                            | 110.071                         | 120.081                    | 129.102                     | 173.125            | 175.115 | 201.121     | 241.074           | 245.093                                          | 274.183 | 328.130             | 385.154 | 421.252             | 427.207 | 550.292 | 569.848            | 678.351 | 789.373 | 806.418 | 903.386 | 920.444 |
| Frac. Inten. (% of TIC) | 0.00   | 0.90    | 4.02   | 7.02             | 4.22                                              | 2.89                            | 0.09                       | 0.07                        | 5.20               | 6.27    | 3.77        | 2.41              | 4.84                                             | 3.04    | 7.83                | 2.42    | 5.59                | 6.22    | 8.43    | 2.72               | 10.00   | 2.21    | 3.14    | 3.09    | 4.23    |
| Rel. Inten. (% of BP)   | 0.04   | 8.87    | 40.15  | 70.21            | 42.15                                             | 28.87                           | 0.90                       | 0.74                        | 52.02              | 62.65   | 37.65       | 24.10             | 46.40                                            | 30.37   | 76.29               | 24.23   | 55.94               | 62.20   | 84.28   | 27.18              | 100.00  | 22.07   | 31.41   | 30.88   | 42.27   |
| Score                   | 0.20   | 0.50    | -0.40  | -0.70            | -0.42                                             | -0.27                           | 1.00                       | 0.20                        | 0.50               | 1.50    | 0.75        | -0.24             | 0.50                                             | 1.50    | 0.25                | -0.24   | 1.50                | 0.25    | 1.50    | -0.27              | 1.50    | 1.50    | 1.50    | 1.50    | 1.50    |
| Ion-type                | PR     | V       | V      | V                | V                                                 | F                               | F                          | RKQ                         | TV-28              | y1      | TV          |                   | b2                                               | y2      | b3-H <sub>2</sub> O | y3      | b4-H <sub>2</sub> O | y4      | y5      | y6-NH <sub>3</sub> | y6      | y6      | y6      | y7      | y7      |
| Delta ppm               | -7.5   | 7.3     |        |                  |                                                   |                                 | -2.3                       | -2.6                        | -25.7              | -21.4   | -19.2       |                   | -14.0                                            | -16.7   | -12.3               |         | -8.7                | 12.3    | -11.0   |                    | 33.1    |         |         |         |         |

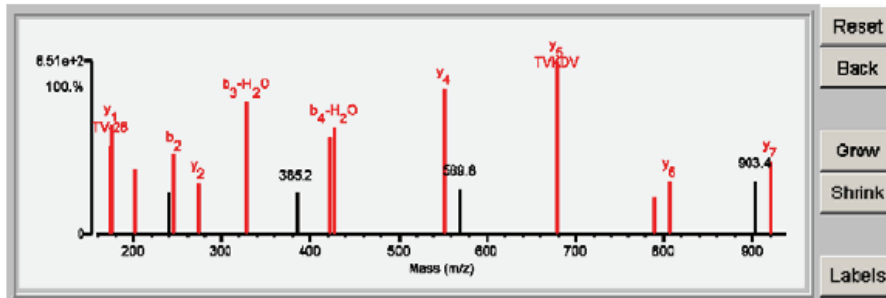

# N4

## Detailed Results

| Rank                    | Score  | SPI (%) | BCS    | # Unmatched Ions | Sequence                                      | MH <sup>+</sup> Calculated (Da) | MH <sup>+</sup> Error (Da) | MH <sup>+</sup> Error (ppm) | Protein MW/pi (Da) | Species | Accession # | MS-Digest Index # | Protein Name                                     |                    |         |         |         |         |         |         |         |         |           |         |         |
|-------------------------|--------|---------|--------|------------------|-----------------------------------------------|---------------------------------|----------------------------|-----------------------------|--------------------|---------|-------------|-------------------|--------------------------------------------------|--------------------|---------|---------|---------|---------|---------|---------|---------|---------|-----------|---------|---------|
| 1                       | 15.20  | 78.8    | 7      | 7/25             | (O) E / V / Q / L / Y / E / S / R / P / R (K) | 1439.8837                       | 0.0089                     | 6.2                         | 8878.8/10.18       | HUMAN   | P82273      | 583257            | 40S ribosomal protein S29 - Homo sapiens (Human) |                    |         |         |         |         |         |         |         |         |           |         |         |
| Fragment-ion (m/z)      | 70.066 | 84.043  | 88.087 | 110.071          | 127.031                                       | 128.084                         | 130.084                    | 132.077                     | 138.074            | 169.090 | 176.121     | 198.087           | 228.084                                          | 255.146            | 272.174 | 273.178 | 363.183 | 370.209 | 409.234 | 483.194 | 496.267 | 695.288 | 698.808+2 | 882.342 | 845.408 |
| Frac. Inten. (% of TIC) | 0.00   | 2.75    | 0.36   | 0.32             | 5.55                                          | 2.59                            | 0.13                       | 2.40                        | 0.35               | 0.31    | 5.82        | 10.62             | 15.70                                            | 3.21               | 7.50    | 2.23    | 4.29    | 4.43    | 2.28    | 2.24    | 8.25    | 4.63    | 2.78      | 7.00    | 3.15    |
| Rel. Inten. (% of BP)   | 0.02   | 17.55   | 2.30   | 2.05             | 42.38                                         | 15.50                           | 0.80                       | 15.31                       | 2.21               | 1.95    | 37.05       | 67.62             | 100.00                                           | 20.46              | 47.75   | 14.19   | 27.32   | 28.24   | 14.52   | 14.28   | 52.56   | 29.47   | 17.72     | 44.60   | 20.04   |
| Score                   | 0.20   | -0.18   | 0.22   | 1.00             | -0.42                                         | -0.16                           |                            | -0.15                       | 1.00               | 2.00    | 1.50        | 0.50              | 0.50                                             | 0.50               | 1.50    | -0.14   | -0.27   | 0.75    | 1.50    | 1.50    | 1.50    | 1.50    | 1.50      | 1.50    | 1.50    |
| Ion-type                | PR     | L1      | H      | H                |                                               |                                 | W                          |                             | Y                  | W       | y1          | a1                | b1                                               | y2-NH <sub>3</sub> | y2      |         | QQL     | QQL     | y3      | y4      | y4      | y4      | y4        | y4      | y4      |
| Delta ppm               | 1.1    |         | 5.5    | -7.0             |                                               |                                 |                            |                             | -11.0              | -8.5    | 10.0        | -19.5             | -5.2                                             | -1.4               | 8.0     |         |         | -1.9    | 9.2     |         | -10.6   | -1.5    | 7.7       | 0.2     | 1.2     |

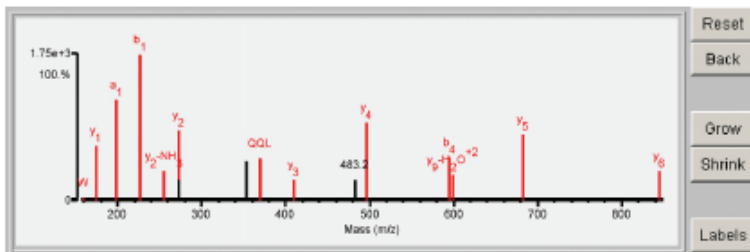

N5

Detailed Results

| Rank | Score | SPI (%) | BCS | # Unmodified Ions | Sequence                | MH <sup>+</sup> Calculated (Da) | MH <sup>+</sup> Error (Da) | MH <sup>+</sup> Error (ppm) | Protein MW/pI (Da) | Species | Accession # | MS-Digest Index # | Protein Name                                     |
|------|-------|---------|-----|-------------------|-------------------------|---------------------------------|----------------------------|-----------------------------|--------------------|---------|-------------|-------------------|--------------------------------------------------|
| 1    | 18.83 | 85.8    | 5   | 6/25              | (-) V/I/I/G/S/L A/R (A) | 827.4192                        | -0.0019                    | -2.3                        | 8847.8/12.16       | HUMAN   | P82881      | 584927            | 40S ribosomal protein S30 - Homo sapiens (Human) |

  

| Fragment-Ion (m/z)      | 80.045 | 70.084 | 72.078 | 78.037 | 88.084 | 110.088 | 111.070 | 112.088 | 116.088 | 158.088 | 180.078 | 176.118 | 185.085 | 228.130 | 240.134 | 311.873 <sup>+2</sup> | 320.878 <sup>+2</sup> | 325.130 | 342.207 | 369.241 | 370.210 <sup>+2</sup> | 448.271 | 486.283 | 603.282 | 640.355 |
|-------------------------|--------|--------|--------|--------|--------|---------|---------|---------|---------|---------|---------|---------|---------|---------|---------|-----------------------|-----------------------|---------|---------|---------|-----------------------|---------|---------|---------|---------|
| Frag. Inten. (% of TIC) | 0.92   | 0.00   | 0.08   | 1.03   | 0.09   | 1.05    | 1.90    | 0.02    | 1.18    | 1.41    | 4.20    | 5.27    | 2.53    | 1.53    | 1.13    | 2.74                  | 35.38                 | 4.02    | 0.72    | 0.81    | 0.86                  | 3.36    | 1.58    | 24.78   | 3.41    |
| Rel. Inten. (% of BP)   | 2.59   | 0.00   | 0.23   | 2.92   | 0.25   | 2.97    | 5.38    | 0.06    | 3.33    | 3.99    | 11.86   | 14.88   | 7.15    | 4.33    | 3.19    | 7.73                  | 100.00                | 11.35   | 2.04    | 2.30    | 2.43                  | 9.50    | 4.45    | 70.03   | 9.64    |
| Score                   | -0.03  | 0.20   | 0.50   | -0.03  | 0.22   | 1.00    | -0.05   | 0.33    | -0.03   | 0.50    | 0.50    | 1.50    | 0.75    | 0.50    | -0.03   | 0.50                  | 1.50                  | 0.50    | 1.50    | 1.50    | 1.50                  | 1.50    | 1.50    | 1.50    | 1.50    |
| Ion-type                |        | PR     | V      |        | LI     | H       |         |         |         | Y1-NH3  | B1      | Y1      | H0      | Y2-NH3  |         | Y5-H2O <sup>+2</sup>  | Y5 <sup>+2</sup>      | D2      | Y3-NH3  | Y3      | Y7 <sup>+2</sup>      | Y4      | Y5-H2O  | Y5      | Y5      |
| Delta ppm               |        | -18.9  | -17.7  |        | -28.2  | -20.7   |         | -31.4   |         | -26.5   | -28.5   | -19.1   | -20.8   |         | -0.1    | -3.9                  | -3.5                  | -12.6   | -19.2   | 2.1     | 1.5                   | -3.3    | -0.1    | -4.0    | 4.3     |

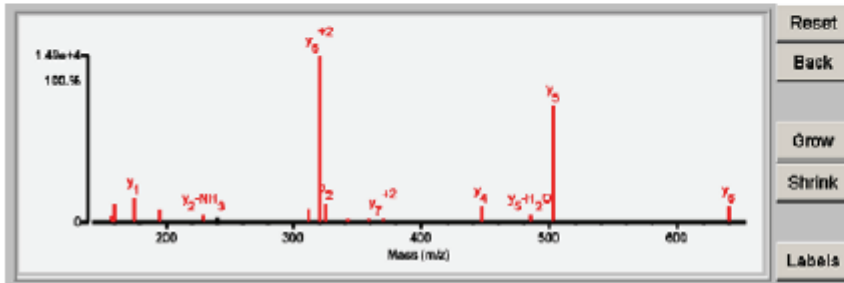

N6

Detailed Results

| Rank | Score | SPI (%) | BCS | # Unmodified Ions | Sequence                      | MH <sup>+</sup> Calculated (Da) | MH <sup>+</sup> Error (Da) | MH <sup>+</sup> Error (ppm) | Protein MW/pI (Da) | Species | Accession # | MS-Digest Index # | Protein Name                                            |
|------|-------|---------|-----|-------------------|-------------------------------|---------------------------------|----------------------------|-----------------------------|--------------------|---------|-------------|-------------------|---------------------------------------------------------|
| 1    | 13.50 | 86.1    | 7   | 12/26             | (-) K/I/E/H/P/T/V/Y/S D/R (S) | 1493.8341                       | 0.0047                     | 3.3                         | 17258.3/10.68      | HUMAN   | G8UNX3      | 507333            | 60S ribosomal protein L25-like 1 - Homo sapiens (Human) |
| 1    | 13.50 | 86.1    | 7   | 12/26             | (-) K/I/E/H/P/T/V/Y/S D/R (S) | 1493.8341                       | 0.0047                     | 3.3                         | 17258.3/10.68      | HUMAN   | P81264      | 507348            | 60S ribosomal protein L25 - Homo sapiens (Human)        |

  

| Fragment-Ion (m/z)      | 70.070 | 84.088 | 120.078 | 121.078 | 242.147 | 282.116 | 352.110 | 377.186 | 378.137 | 408.123 | 411.218 <sup>+2</sup> | 488.230 <sup>+2</sup> | 478.214 | 520.183 | 570.371 | 577.298 | 813.228 | 818.189 | 882.273 <sup>+2</sup> | 883.283 <sup>+2</sup> | 724.358 | 821.421 | 836.473 | 1022.473 | 1082.634 |
|-------------------------|--------|--------|---------|---------|---------|---------|---------|---------|---------|---------|-----------------------|-----------------------|---------|---------|---------|---------|---------|---------|-----------------------|-----------------------|---------|---------|---------|----------|----------|
| Frag. Inten. (% of TIC) | 2.77   | 2.34   | 0.29    | 1.78    | 1.87    | 10.76   | 3.60    | 2.24    | 2.35    | 4.83    | 10.14                 | 4.01                  | 6.88    | 4.65    | 2.23    | 2.97    | 1.85    | 2.12    | 2.57                  | 3.89                  | 2.36    | 12.70   | 5.64    | 3.46     | 1.90     |
| Rel. Inten. (% of BP)   | 21.81  | 18.41  | 2.32    | 14.01   | 14.75   | 84.78   | 28.37   | 17.64   | 18.52   | 38.03   | 79.90                 | 31.57                 | 52.61   | 36.62   | 17.54   | 23.36   | 14.57   | 16.67   | 20.25                 | 30.63                 | 19.55   | 100.00  | 44.44   | 27.27    | 14.99    |
| Score                   | -0.22  | -0.18  | 1.00    | -0.14   | -0.15   | 0.75    | 0.50    | 1.50    | -0.19   | -0.38   | 1.50                  | 1.50                  | -0.37   | -0.18   | -0.18   | 7.2     | 0.50    | -0.17   | -0.20                 | -0.31                 | 1.50    | 1.50    | 1.50    | -0.27    | 1.50     |
| Ion-type                |        |        | F       |         |         | FN      | b1      | y3      |         |         | y7 <sup>+2</sup>      | y8 <sup>+2</sup>      | y4      |         |         | y5      | b3      |         |                       |                       | y8      | y7      | y8      | y9       | y9       |
| Delta ppm               |        |        | -16.5   |         |         | -19.1   | -15.6   | -34.0   |         |         | 16.2                  |                       | -23.6   |         |         | 7.2     | 0.6     |         |                       |                       | -9.4    | 6.5     | 15.5    |          | 6.7      |

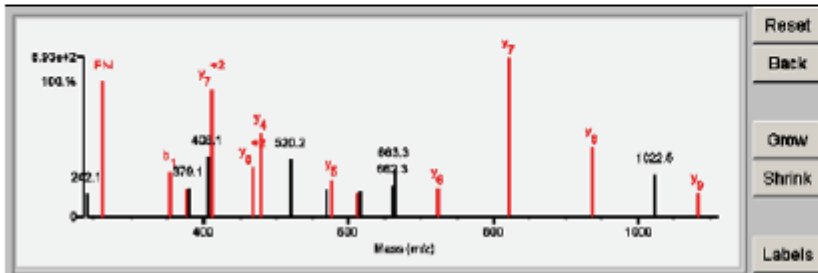

N7

Detailed Results

| Rank | Score | SP1 (%) | BCS | # Unmatched Ions | Sequence                              | MH <sup>+</sup> Calculated (Da) | MH <sup>+</sup> Error (Da) | MH <sup>+</sup> Error (ppm) | Protein MW/pi (Da) | Species | Accession #            | MS-Digest Index #     | Protein Name                                                       |
|------|-------|---------|-----|------------------|---------------------------------------|---------------------------------|----------------------------|-----------------------------|--------------------|---------|------------------------|-----------------------|--------------------------------------------------------------------|
| 1    | 20.81 | 87.4    | 7   | 2/25             | (-) I I L I L I E I V I W I W I R (I) | 1068.6883                       | 0.0094                     | 8.2                         | 3433.218.84        | HUMAN   | <a href="#">Q15144</a> | <a href="#">35681</a> | Actin-related protein 2/3 complex subunit 2 - Homo sapiens (Human) |

  

| Fragment-Ion (m/z)      | 72.080 | 86.088 | 87.101 | 174.086 | 176.118 | 198.180 | 202.082 | 216.140 | 227.178 | 243.198 | 288.184 | 280.188 | 316.174 | 368.214 | 372.702 <sup>+2</sup> | 388.183 | 409.208 | 428.267 | 428.251 <sup>+2</sup> | 602.274 | 657.313 | 813.288 | 831.314 | 744.388 | 867.485 |
|-------------------------|--------|--------|--------|---------|---------|---------|---------|---------|---------|---------|---------|---------|---------|---------|-----------------------|---------|---------|---------|-----------------------|---------|---------|---------|---------|---------|---------|
| Frac. Inten. (% of TIC) | 0.02   | 0.83   | 1.80   | 4.73    | 1.82    | 4.07    | 1.04    | 0.75    | 3.07    | 1.77    | 5.82    | 0.82    | 14.28   | 1.67    | 1.70                  | 0.75    | 5.12    | 3.13    | 2.89                  | 9.70    | 2.34    | 2.64    | 16.28   | 9.52    | 3.41    |
| Rel. Inten. (% of BP)   | 0.14   | 5.10   | 11.06  | 29.04   | 11.20   | 25.01   | 6.37    | 4.63    | 18.88   | 10.88   | 35.74   | 5.03    | 87.72   | 10.23   | 10.46                 | 4.70    | 31.42   | 19.25   | 17.77                 | 59.58   | 14.39   | 15.19   | 100.00  | 58.48   | 20.94   |
| Score                   | 0.50   | 0.22   | -0.11  | 0.50    | 1.50    | 0.50    | 0.50    | 0.75    | 0.75    | 1.50    | -0.05   | 0.50    | 0.75    | 1.50    | 0.50                  | 1.50    | 1.50    | 0.50    | 1.50                  | 0.50    | 0.50    | 0.50    | 1.50    | 1.50    | 1.50    |
| Ion-type                | V      | LI     |        | a1      | y1      | LL-28   | b1      | LE-28   | LL      | LE      | y2      |         | b2      | LLE     | y6 <sup>+2</sup>      | y3-NH3  | y3      | b3      | y7 <sup>+2</sup>      | y4      | b4      | y5-H2O  | y5      | y6      | y7      |
| Delta ppm               | -14.9  | 17.1   |        | 2.8     | -5.0    | -9.5    | 6.3     | -1.5    | -0.4    | 5.6     | 7.3     |         | -3.1    | -14.6   | -4.5                  | 12.0    | 11.1    | -5.0    | 12.1                  | 1.0     | 20.4    | -11.7   | -3.3    | -1.7    | 1.4     |

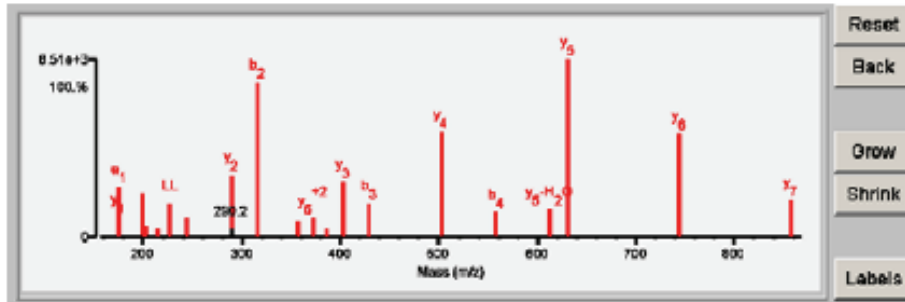

N8

Detailed Results

| Rank | Score | SP1 (%) | BCS | # Unmatched Ions | Sequence                                                | MH <sup>+</sup> Calculated (Da) | MH <sup>+</sup> Error (Da) | MH <sup>+</sup> Error (ppm) | Protein MW/pi (Da) | Species | Accession #            | MS-Digest Index #     | Protein Name                                                       |
|------|-------|---------|-----|------------------|---------------------------------------------------------|---------------------------------|----------------------------|-----------------------------|--------------------|---------|------------------------|-----------------------|--------------------------------------------------------------------|
| 1    | 15.11 | 71.4    | 11  | 7/25             | (P) A T R R S L M D P D F K (L) G R N A (L) L P I R (S) | 2779.3438                       | -0.0086                    | -1.3                        | 20546.898.77       | HUMAN   | <a href="#">Q15145</a> | <a href="#">31832</a> | Actin-related protein 2/3 complex subunit 3 - Homo sapiens (Human) |

  

| Fragment-Ion (m/z)      | 84.081 | 86.086 | 136.075 | 175.118 | 385.255 | 498.337 | 611.418 | 653.751 <sup>+2</sup> | 682.458 | 729.774 <sup>+2</sup> | 738.786 <sup>+2</sup> | 776.308 <sup>+2</sup> | 785.314           | 795.324 <sup>+2</sup> | 841.840 <sup>+2</sup> | 851.885 <sup>+2</sup> | 878.387 | 884.581 | 993.372 | 1002.917 <sup>+2</sup> | 1038.461 <sup>+2</sup> | 1049.442 <sup>+2</sup> | 1064.958 <sup>+2</sup> | 1097.850 | 1210.748 |
|-------------------------|--------|--------|---------|---------|---------|---------|---------|-----------------------|---------|-----------------------|-----------------------|-----------------------|-------------------|-----------------------|-----------------------|-----------------------|---------|---------|---------|------------------------|------------------------|------------------------|------------------------|----------|----------|
| Frac. Inten. (% of TIC) | 1.87   | 0.21   | 0.09    | 1.80    | 15.40   | 7.15    | 2.96    | 2.11                  | 3.78    | 10.38                 | 2.55                  | 3.99                  | 1.88              | 3.33                  | 2.80                  | 2.67                  | 2.19    | 10.75   | 5.47    | 6.11                   | 2.70                   | 1.91                   | 4.80                   | 1.75     |          |
| Rel. Inten. (% of BP)   | 12.13  | 1.38   | 0.37    | 11.67   | 100.00  | 48.45   | 18.81   | 13.71                 | 24.38   | 87.27                 | 18.57                 | 25.94                 | 12.19             | 21.62                 | 18.21                 | 17.31                 | 14.23   | 88.82   | 35.48   | 38.70                  | 11.34                  | 18.11                  | 12.41                  | 31.17    | 11.35    |
| Score                   | -0.12  | 0.22   | 1.00    | 1.50    | 1.50    | 1.50    | 1.50    | 0.50                  | 1.50    | -0.67                 | -0.17                 | 0.25                  | 0.50              | -0.22                 | 0.50                  | -0.17                 | 0.50    | 1.50    | 0.50    | -0.40                  | -0.11                  | 1.50                   | 0.50                   | 1.50     |          |
| Ion-type                | LI     | Y      | Y       | y1      | y5      | y4      | y5      | b11 <sup>+2</sup>     | y6      | b12-H2O <sup>+2</sup> | b12                   | b11 <sup>+2</sup>     | b13 <sup>+2</sup> | b13 <sup>+2</sup>     | b13 <sup>+2</sup>     | b7                    | y9      | b6      |         |                        | b17 <sup>+2</sup>      | b18 <sup>+2</sup>      | y10                    | y11      |          |
| Delta ppm               | -8.1   | -5.1   | -3.7    | -1.2    | -4.9    | -9.7    | 4.8     | -3.8                  |         | 0.2                   | 2.0                   |                       | -18.0             |                       | 14.7                  | -5.3                  | -9.7    |         |         |                        | -6.8                   | -9.0                   | 0.4                    | 11.4     |          |

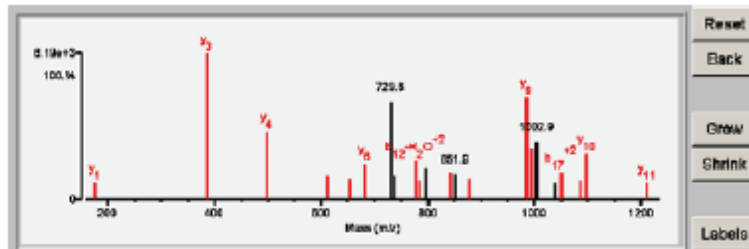

N9

Detailed Results

| Rank | Score | SPI (%) | BCS | # Unmatched Ions | Sequence                                                        | MH <sup>+</sup> Calculated (Da) | MH <sup>+</sup> Error (Da) | MH <sup>+</sup> Error (ppm) | Protein MW/pi (Da) | Species | Accession #            | MS-Digest Index #    | Protein Name                               |
|------|-------|---------|-----|------------------|-----------------------------------------------------------------|---------------------------------|----------------------------|-----------------------------|--------------------|---------|------------------------|----------------------|--------------------------------------------|
| 1    | 10.18 | 84.1    | 8   | 11/26            | (P) A R L L L Q D L I S L S Y T T T / T T I / A / P P S / R (V) | 2884.2821                       | 0.0127                     | 4.8                         | 41622.819.07       | HUMAN   | <a href="#">Q00787</a> | <a href="#">7083</a> | Acyl-CoA desaturase - Homo sapiens (Human) |

  

| Fragment-ion (m/z)      | 70.064 | 86.097 | 138.075 | 189.081 | 175.118        | 410.178        | 447.231        | 466.261        | 527.287                             | 641.270+2      | 666.278        | 828.342        | 740.378        | 780.886                             | 802.373+2                           | 819.342+2                           | 828.378                             | 862.883+2                           | 878.417+2                           | 881.380                             | 926.410+2                           | 943.527                             | 946.426+2                           | 1000.004                            | 1009.997                            |
|-------------------------|--------|--------|---------|---------|----------------|----------------|----------------|----------------|-------------------------------------|----------------|----------------|----------------|----------------|-------------------------------------|-------------------------------------|-------------------------------------|-------------------------------------|-------------------------------------|-------------------------------------|-------------------------------------|-------------------------------------|-------------------------------------|-------------------------------------|-------------------------------------|-------------------------------------|
| Frac. Inten. (% of TIC) | 0.00   | 0.27   | 0.19    | 2.60    | 3.06           | 2.92           | 2.61           | 24.11          | 5.22                                | 3.38           | 3.20           | 4.42           | 2.72           | 2.55                                | 3.76                                | 3.70                                | 5.99                                | 7.12                                | 2.75                                | 3.77                                | 2.99                                | 3.26                                | 4.12                                | 2.71                                | 2.60                                |
| Rel. Inten. (% of BP)   | 0.02   | 1.12   | 0.79    | 10.75   | 12.68          | 12.13          | 10.92          | 100.00         | 21.53                               | 14.02          | 13.26          | 18.32          | 11.28          | 10.57                               | 15.60                               | 15.33                               | 24.89                               | 29.52                               | 11.41                               | 16.93                               | 12.37                               | 13.52                               | 17.98                               | 11.24                               | 10.79                               |
| Score                   | 0.20   | 0.22   | 1.00    | 0.75    | 1.50           | 0.50           | -0.11          | 1.50           | 1.50                                | 0.50           | -0.13          | 1.50           | -0.11          | -0.11                               | 0.25                                | -0.16                               | -0.25                               | 0.25                                | -0.11                               | 0.50                                | -0.12                               | 1.50                                | -0.17                               | -0.11                               | -0.11                               |
| Ion-type                | PR     | LI     | Y       | AP      | y <sub>1</sub> | b <sub>3</sub> | y <sub>4</sub> | y <sub>5</sub> | b <sub>14</sub> -NH <sub>3</sub> +2 | y <sub>6</sub> | y <sub>6</sub> | y <sub>6</sub> | y <sub>6</sub> | b <sub>14</sub> -NH <sub>3</sub> +2 | b <sub>14</sub> -NH <sub>3</sub> +2 | b <sub>14</sub> -NH <sub>3</sub> +2 | b <sub>14</sub> -NH <sub>3</sub> +2 | b <sub>14</sub> -NH <sub>3</sub> +2 | b <sub>14</sub> -NH <sub>3</sub> +2 | b <sub>14</sub> -NH <sub>3</sub> +2 | b <sub>14</sub> -NH <sub>3</sub> +2 | b <sub>14</sub> -NH <sub>3</sub> +2 | b <sub>14</sub> -NH <sub>3</sub> +2 | b <sub>14</sub> -NH <sub>3</sub> +2 | b <sub>14</sub> -NH <sub>3</sub> +2 |
| Delta ppm               | -11.8  | 11.3   | -4.3    | -42.9   | -6.0           | -18.6          |                | -12.1          | 6.0                                 | 30.7           |                | 0.6            |                |                                     | 26.9                                |                                     |                                     | 8.7                                 |                                     | -4.1                                |                                     | 7.1                                 |                                     |                                     |                                     |

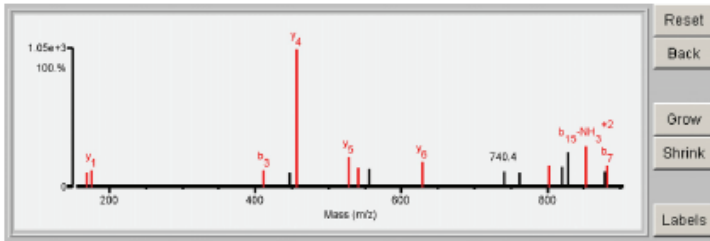

N10

Detailed Results

| Rank | Score | SPI (%) | BCS | # Unmatched Ions | Sequence                      | MH <sup>+</sup> Calculated (Da) | MH <sup>+</sup> Error (Da) | MH <sup>+</sup> Error (ppm) | Protein MW/pi (Da) | Species | Accession #            | MS-Digest Index #     | Protein Name                                 |
|------|-------|---------|-----|------------------|-------------------------------|---------------------------------|----------------------------|-----------------------------|--------------------|---------|------------------------|-----------------------|----------------------------------------------|
| 1    | 15.80 | 86.2    | 6   | 4/24             | (P) T / V / E / L / Y / R (N) | 997.4659                        | 0.0004                     | 0.4                         | 57561.4/5.84       | HUMAN   | <a href="#">Q9BZZ5</a> | <a href="#">23249</a> | Apoptosis inhibitor 5 - Homo sapiens (Human) |

  

| Fragment-ion (m/z)      | 70.065 | 72.082 | 74.061 | 84.046 | 86.096 | 99.029 | 102.055 | 110.071 | 136.078                          | 172.043        | 175.119 | 201.121 | 229.120                          | 271.109                         | 321.153 | 323.090        | 338.182           | 404.719+2      | 418.167        | 451.267        | 580.304                          | 691.344        | 709.346        | 808.413 |
|-------------------------|--------|--------|--------|--------|--------|--------|---------|---------|----------------------------------|----------------|---------|---------|----------------------------------|---------------------------------|---------|----------------|-------------------|----------------|----------------|----------------|----------------------------------|----------------|----------------|---------|
| Frac. Inten. (% of TIC) | 0.00   | 1.14   | 3.92   | 0.10   | 0.28   | 3.34   | 0.09    | 3.87    | 0.17                             | 2.22           | 7.91    | 3.62    | 3.87                             | 7.89                            | 2.98    | 2.88           | 6.37              | 3.55           | 2.22           | 6.09           | 13.55                            | 3.16           | 15.82          | 5.89    |
| Rel. Inten. (% of BP)   | 0.02   | 7.22   | 24.79  | 0.61   | 1.75   | 21.09  | 0.58    | 23.21   | 1.04                             | 14.02          | 49.98   | 22.24   | 23.18                            | 48.61                           | 18.88   | 18.05          | 40.26             | 22.41          | 14.06          | 38.51          | 85.83                            | 19.94          | 100.00         | 35.94   |
| Score                   | 0.20   | 0.50   | -0.25  | 1.00   | 0.22   | -0.21  |         | -0.23   | 1.00                             | 0.25           | 1.50    | 0.50    | 0.75                             | 0.25                            | 0.50    | -0.18          | 1.50              | 1.50           | 0.50           | 1.50           | 1.50                             | 0.50           | 1.50           | 1.50    |
| Ion-type                | PR     | V      |        | E      | LI     |        | E       | Y       | b <sub>1</sub> -H <sub>2</sub> O | y <sub>1</sub> | VE-28   | VE      | b <sub>2</sub> -H <sub>2</sub> O | y <sub>2</sub> -NH <sub>3</sub> |         | y <sub>2</sub> | y <sub>6</sub> +2 | b <sub>3</sub> | y <sub>3</sub> | y <sub>4</sub> | y <sub>5</sub> -H <sub>2</sub> O | y <sub>5</sub> | y <sub>6</sub> |         |
| Delta ppm               | -4.6   | 10.0   |        | 23.9   | -1.5   |        |         | 19.2    |                                  | -6.2           | 2.6     | -18.7   | 2.3                              | -12.1                           | -9.8    |                | -1.7              | 14.3           | 3.7            | 1.7            | -9.2                             | 4.5            | -8.4           | -9.1    |

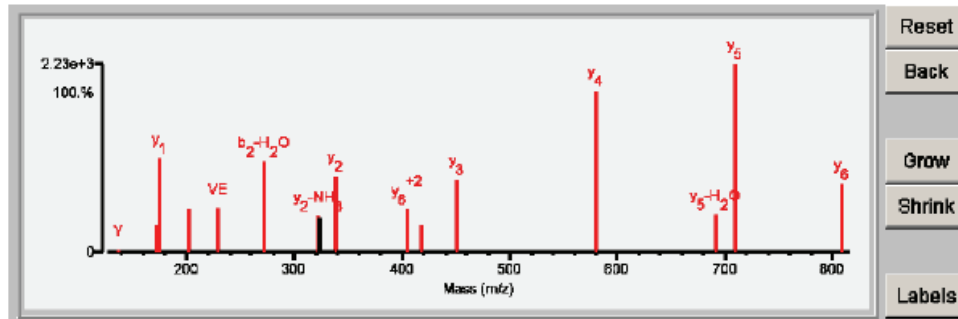

# N11

## Detailed Results

| Rank | Score | SPI (%) | BCS | # Unmatched Ions | Sequence                 | MH <sup>+</sup> Calculated (Da) | MH <sup>+</sup> Error (Da) | MH <sup>+</sup> Error (ppm) | Protein MW (kDa) | Species | Accession #            | MS-Digest Index #      | Protein Name                                                    |
|------|-------|---------|-----|------------------|--------------------------|---------------------------------|----------------------------|-----------------------------|------------------|---------|------------------------|------------------------|-----------------------------------------------------------------|
| 1    | 17.95 | 88.0    | 8   | 8/26             | (V)I[A]E[L]Y/T/S/D/R (E) | 1163.6668                       | 0.0065                     | 4.8                         | 82943.3/6.90     | HUMAN   | <a href="#">Q43776</a> | <a href="#">828343</a> | Asparaginyl-tRNA synthetase, cytoplasmic - Homo sapiens (Human) |

  

| Fragment-ion (m/z)      | 72.082 | 86.097 | 114.082 | 133.061 | 136.071 | 174.096 | 175.126 | 201.087 | 202.090 | 209.084 | 279.128 | 274.192 | 290.144 | 314.175 | 369.172 | 377.176 | 402.187 | 404.186 <sup>+2</sup> | 478.247 | 516.266 | 667.082 | 858.310 | 752.888 | 881.429 | 862.467 |
|-------------------------|--------|--------|---------|---------|---------|---------|---------|---------|---------|---------|---------|---------|---------|---------|---------|---------|---------|-----------------------|---------|---------|---------|---------|---------|---------|---------|
| Frac. Inten. (% of TIC) | 0.07   | 0.19   | 1.89    | 2.76    | 0.04    | 3.94    | 3.34    | 5.95    | 7.51    | 1.43    | 7.04    | 1.61    | 1.69    | 1.37    | 1.48    | 6.96    | 9.71    | 1.66                  | 8.09    | 4.94    | 1.64    | 12.57   | 7.20    | 3.82    | 3.09    |
| Rel. Inten. (% of BP)   | 0.55   | 1.51   | 15.04   | 21.98   | 0.35    | 31.33   | 26.61   | 47.33   | 59.77   | 11.35   | 55.98   | 12.82   | 13.41   | 10.90   | 11.79   | 55.35   | 77.27   | 13.18                 | 64.38   | 39.30   | 13.06   | 100.00  | 57.31   | 30.40   | 24.58   |
| Score                   | 0.50   | 0.22   | -0.15   | -0.22   | 1.00    | 0.50    | 1.50    | 0.75    | 0.50    | -0.11   | 0.50    | -0.13   | 1.50    | 0.75    | 0.50    | 1.50    | 0.50    | -0.13                 | 1.50    | 0.50    | -0.13   | 1.50    | 1.50    | 1.50    | 1.50    |
| Ion-type                | V      | LI     |         | Y       |         | a1      | y1      | AE      | b1      |         | b2      |         | y2      | AEL     | y3-H2O  | y3      | b3      |                       | y4      | b4      |         | y5      | y6      | y7      | y8      |
| Delta ppm               | 11.4   | 5.5    |         |         | -37.4   |         | -5.8    | 32.8    | -6.4    | -1.5    |         |         | -0.1    | -6.2    | 7.5     | 11.8    | -8.3    | -8.8                  | 0.8     | 0.8     |         | 1.1     | -7.6    | -8.1    | -6.5    |

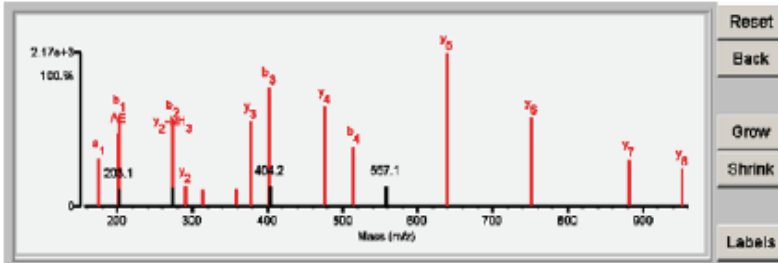

# N12

## Detailed Results

| Rank | Score | SPI (%) | BCS | # Unmatched Ions | Sequence                         | MH <sup>+</sup> Calculated (Da) | MH <sup>+</sup> Error (Da) | MH <sup>+</sup> Error (ppm) | Protein MW (kDa) | Species | Accession #            | MS-Digest Index #     | Protein Name                                                 |
|------|-------|---------|-----|------------------|----------------------------------|---------------------------------|----------------------------|-----------------------------|------------------|---------|------------------------|-----------------------|--------------------------------------------------------------|
| 1    | 12.42 | 82.9    | 7   | 8/25             | (V)P[P]V[Q]V[S]P L I K L/G R (Y) | 1626.8859                       | 0.0009                     | 0.5                         | 7933.2/9.34      | HUMAN   | <a href="#">P56385</a> | <a href="#">42799</a> | ATP synthase subunit e, mitochondrial - Homo sapiens (Human) |

  

| Fragment-ion (m/z)      | 70.067 | 72.078 | 86.097 | 158.061 | 159.070 | 186.060 | 232.136 | 283.111 | 341.145 | 354.185 | 382.179 | 399.205 | 510.229 | 609.304 | 696.341 | 883.576 | 925.520 | 931.547 | 1018.597 | 1024.572 | 1110.700 | 1117.645 | 1245.704 | 1348.752 | 1441.837 |
|-------------------------|--------|--------|--------|---------|---------|---------|---------|---------|---------|---------|---------|---------|---------|---------|---------|---------|---------|---------|----------|----------|----------|----------|----------|----------|----------|
| Frac. Inten. (% of TIC) | 0.01   | 0.06   | 0.14   | 7.61    | 1.74    | 11.14   | 2.22    | 11.43   | 2.05    | 5.35    | 9.82    | 1.53    | 5.59    | 4.82    | 1.91    | 3.11    | 3.52    | 4.00    | 8.41     | 1.91     | 1.89     | 6.08     | 2.83     | 1.57     | 1.68     |
| Rel. Inten. (% of BP)   | 0.05   | 0.55   | 1.26   | 66.58   | 15.25   | 97.43   | 19.41   | 100.00  | 17.97   | 46.83   | 84.14   | 13.34   | 48.94   | 42.15   | 16.74   | 27.22   | 30.81   | 35.02   | 73.62    | 16.69    | 14.74    | 53.04    | 24.79    | 13.70    | 14.88    |
| Score                   | 0.20   | 0.50   | 0.22   | 0.50    | -0.15   | 0.50    | 1.50    | 0.50    | -0.18   | 0.50    | 0.50    | -0.13   | 0.50    | 0.50    | 0.50    | -0.27   | -0.31   | 1.50    | 1.50     | 1.50     | 1.50     | 1.50     | 1.50     | -0.14    | 1.50     |
| Ion-type                | PR     | V      | LI     | a1      |         | b1      | y2      | b2      |         | a3      | b3      |         | b4      | b5      | b6      |         |         | y7      | y8       |          | y9       | y10      |          |          |          |
| Delta ppm               | 26.8   | -37.1  | 7.8    | -19.7   |         | 1.5     | -17.3   | -3.8    |         | -1.9    | -4.2    |         | -19.6   | -6.6    | 1.3     |         |         | -8.3    | 10.5     |          | -9.4     | -7.9     |          |          |          |

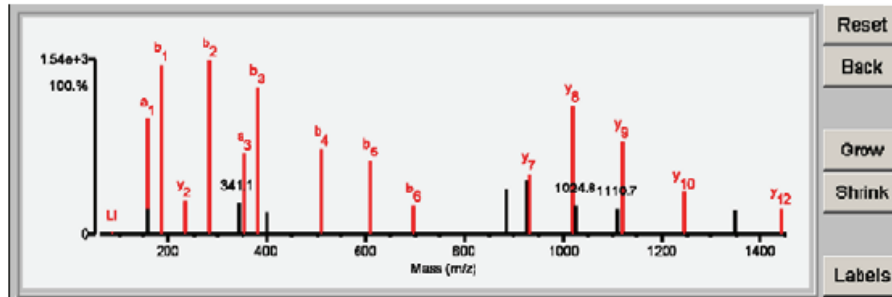

# N13

## Detailed Results

| Rank                    | Score  | SPI (%) | BCS    | # Unmatched Ions | Sequence                | MH <sup>+</sup> Calculated (Da) | MH <sup>+</sup> Error (Da) | MH <sup>+</sup> Error (ppm) | Protein MW/pI (Da) | Species | Accession #            | MS-Digest Index #     | Protein Name                               |         |         |         |         |         |         |         |         |         |         |         |         |
|-------------------------|--------|---------|--------|------------------|-------------------------|---------------------------------|----------------------------|-----------------------------|--------------------|---------|------------------------|-----------------------|--------------------------------------------|---------|---------|---------|---------|---------|---------|---------|---------|---------|---------|---------|---------|
| 1                       | 12.81  | 64.7    | 7      | 10/25            | (-) S L/S/A/E/Y/L/R (E) | 1068.5030                       | 0.0025                     | 2.3                         | 10116.6/6.07       | HUMAN   | <a href="#">Q9H3K6</a> | <a href="#">56707</a> | BolA-like protein 2 - Homo sapiens (Human) |         |         |         |         |         |         |         |         |         |         |         |         |
| Fragment-Ion (m/z)      | 70.066 | 72.079  | 86.097 | 102.054          | 129.107                 | 136.076                         | 172.041                    | 173.124                     | 175.117            | 190.069 | 201.114                | 218.041               | 223.104                                    | 288.114 | 288.198 | 328.134 | 400.135 | 451.268 | 482.196 | 490.257 | 580.304 | 651.339 | 721.362 | 738.383 | 851.473 |
| Frac. Inten. (% of TIC) | 0.01   | 5.23    | 1.26   | 0.13             | 0.09                    | 0.17                            | 3.20                       | 3.58                        | 4.57               | 2.80    | 3.17                   | 3.72                  | 3.20                                       | 3.21    | 3.43    | 2.98    | 3.92    | 5.79    | 3.30    | 3.90    | 4.92    | 9.97    | 3.25    | 17.07   | 7.15    |
| Rel. Inten. (% of BP)   | 0.04   | 30.66   | 7.39   | 0.77             | 0.51                    | 1.00                            | 18.74                      | 20.87                       | 26.79              | 16.40   | 18.57                  | 21.79                 | 18.72                                      | 18.79   | 20.09   | 17.45   | 22.98   | 33.89   | 19.36   | 22.85   | 28.83   | 58.40   | 19.06   | 100.00  | 41.89   |
| Score                   | 0.20   | -0.31   | 0.22   | 1.00             | 0.20                    | 1.00                            | -0.19                      | -0.21                       | 1.50               | -0.16   | -0.19                  | 0.50                  | -0.19                                      | 0.75    | 1.50    | -0.17   | -0.23   | 1.50    | -0.19   | -0.23   | 1.50    | 1.50    | 0.50    | 1.50    | 1.50    |
| Ion-type                | PR     |         | LI     | E                | RKQ                     | Y                               |                            |                             | y1                 |         |                        | b1                    |                                            | SAE     | y2      |         |         | y3      |         |         | y4      | y5      | y6-NH3  | y6      | y7      |
| Delta ppm               | 11.1   |         | 10.2   | -13.3            | 37.6                    | 3.7                             |                            |                             | -9.4               |         |                        | -36.5                 |                                            | -21.9   | -16.7   |         |         | 3.2     |         |         | -7.6    | -10.8   | 14.8    | 7.2     | 12.3    |

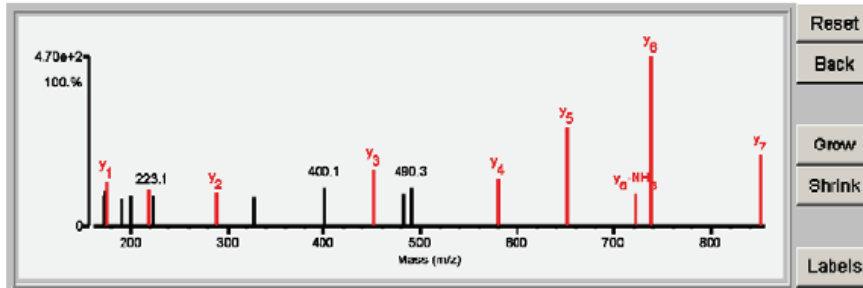

# N14

## Detailed Results

| Rank                    | Score  | SPI (%) | BCS     | # Unmatched Ions | Sequence                               | MH <sup>+</sup> Calculated (Da) | MH <sup>+</sup> Error (Da) | MH <sup>+</sup> Error (ppm) | Protein MW/pI (Da) | Species | Accession #            | MS-Digest Index #     | Protein Name                                           |         |         |         |         |         |         |          |          |          |          |          |          |
|-------------------------|--------|---------|---------|------------------|----------------------------------------|---------------------------------|----------------------------|-----------------------------|--------------------|---------|------------------------|-----------------------|--------------------------------------------------------|---------|---------|---------|---------|---------|---------|----------|----------|----------|----------|----------|----------|
| 1                       | 28.72  | 100.0   | 13      | 0/26             | (-) V G QNEVAIAIAIVIEIIEIVIS/G V/R (Q) | 1701.8476                       | 0.0009                     | 0.6                         | 13196.0/4.87       | HUMAN   | <a href="#">G98HQ2</a> | <a href="#">59581</a> | CDKN2AP N-terminal-like protein - Homo sapiens (Human) |         |         |         |         |         |         |          |          |          |          |          |          |
| Fragment-Ion (m/z)      | 88.088 | 176.118 | 244.088 | 302.118          | 316.128                                | 331.209                         | 418.238                    | 481.154                     | 502.188            | 517.304 | 573.233                | 650.384               | 644.271                                                | 716.307 | 758.438 | 814.388 | 888.478 | 948.418 | 987.541 | 1058.578 | 1072.444 | 1128.617 | 1186.581 | 1200.848 | 1284.805 |
| Frac. Inten. (% of TIC) | 0.07   | 3.92    | 2.17    | 1.38             | 1.64                                   | 7.03                            | 6.53                       | 3.39                        | 6.90               | 4.73    | 9.23                   | 1.23                  | 7.15                                                   | 6.98    | 1.58    | 5.48    | 5.29    | 0.94    | 5.87    | 5.90     | 1.97     | 4.05     | 2.61     | 2.25     | 1.72     |
| Rel. Inten. (% of BP)   | 0.75   | 42.42   | 23.49   | 14.98            | 17.81                                  | 76.11                           | 70.77                      | 36.72                       | 74.78              | 51.25   | 100.00                 | 13.28                 | 77.44                                                  | 75.64   | 17.11   | 59.31   | 57.30   | 10.15   | 63.60   | 63.92    | 21.30    | 43.82    | 28.25    | 24.32    | 18.60    |
| Score                   | 0.22   | 1.50    | 0.75    | 0.50             | 0.75                                   | 1.50                            | 1.50                       | 0.50                        | 1.50               | 0.50    | 1.50                   | 0.50                  | 0.50                                                   | 1.50    | 0.50    | 1.50    | 1.50    | 0.50    | 1.50    | 1.50     | 0.50     | 1.50     | 0.50     | 1.50     | 0.50     |
| Ion-type                | LI     | y1      | GQE     | b3               | GGEA                                   | y3                              | y4                         | b4                          | b5                 | y5      | b6                     | y6                    | b7                                                     | y7      | b8      | y7      | b9      | y8      | b10     | y9       | b11      | y10      | b12      | y11      | b13      |
| Delta ppm               | -4.9   | -6.0    | 7.0     | 1.7              | -5.7                                   | 0.2                             | -5.6                       | -16.0                       | -3.8               | -9.4    | -2.8                   | 0.9                   | -0.8                                                   | -3.0    | 3.1     | -11.5   | -2.6    | -1.0    | -5.6    | -5.2     | -17.0    | -3.3     | -13.3    | -8.1     | -7.9     |

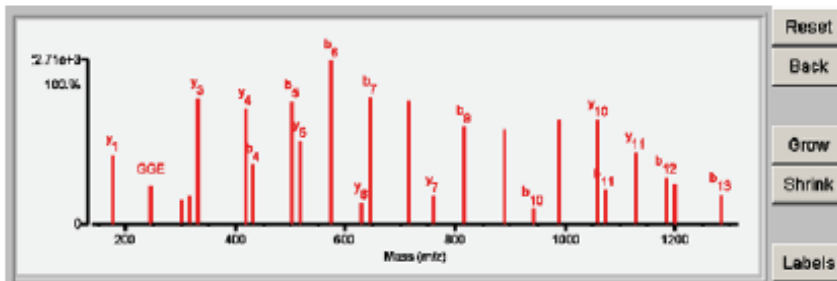

# N15

## Detailed Results

| Rank | Score | SPI (%) | BCS | # Unmatched Ions | Sequence                                            | MH <sup>+</sup> Calculated (Da) | MH <sup>+</sup> Error (Da) | MH <sup>+</sup> Error (ppm) | Protein MW (Da) | Species | Accession #                                     | MS-Digest Index # | Protein Name                                           |
|------|-------|---------|-----|------------------|-----------------------------------------------------|---------------------------------|----------------------------|-----------------------------|-----------------|---------|-------------------------------------------------|-------------------|--------------------------------------------------------|
| 1    | 22.46 | 97.8    | 11  | 1/26             | (V) G G E A I A I A I V E I E I I V I S / G V R (Q) | 1802.7782                       | -0.0016                    | -0.9                        | 13188.014.87    | HUMAN   | <a href="#">Q99HQ2</a><br><a href="#">58581</a> |                   | CDKN2AP N-terminal-like protein - Homo sapiens (Human) |

  

| Fragment-ion (m/z)      | 70.086 | 72.082 | 88.097 | 198.077 | 176.119 | 187.076 | 551.210 | 408.130 | 418.242 | 474.188 | 517.309 | 646.204 | 618.242 | 830.384 | 715.311 | 769.441 | 844.368 | 888.474 | 973.377 | 987.668 | 1068.584 | 1088.488 | 1128.828 | 1186.557 | 1200.878 |
|-------------------------|--------|--------|--------|---------|---------|---------|---------|---------|---------|---------|---------|---------|---------|---------|---------|---------|---------|---------|---------|---------|----------|----------|----------|----------|----------|
| Frac. Inten. (% of TIC) | 0.00   | 0.12   | 0.39   | 2.22    | 4.83    | 1.49    | 9.72    | 6.95    | 6.20    | 8.79    | 2.98    | 10.15   | 7.13    | 1.76    | 4.68    | 1.68    | 1.84    | 6.46    | 2.73    | 4.95    | 5.65     | 1.78     | 3.99     | 1.86     | 1.52     |
| Rel. Inten. (% of BP)   | 0.01   | 1.19   | 3.88   | 21.87   | 47.59   | 14.70   | 95.82   | 69.55   | 61.13   | 86.64   | 29.34   | 100.00  | 70.28   | 17.38   | 46.14   | 16.59   | 18.14   | 63.65   | 26.95   | 48.85   | 55.72    | 17.53    | 39.36    | 18.37    | 15.98    |
| Score                   | 0.20   | 0.50   | 0.22   | -0.22   | 1.50    | 0.75    | 1.50    | 0.50    | 1.50    | 0.50    | 1.50    | 0.50    | 0.50    | 1.50    | 0.50    | 1.50    | 0.50    | 1.50    | 0.50    | 1.50    | 1.50     | 0.50     | 1.50     | 0.50     | 1.50     |
| Ion-type                | PR     | V      | LI     |         | Y1      | GE      | Y3      | b4      | y4      | b5      | y5      | b5      | b7      | y6      | b6      | y7      | b9      | y8      | b10     | y9      | y10      | b11      | y11      | b12      | y12      |
| Delta ppm               | 16.8   | 11.4   | 10.2   |         | 0.8     | 20.7    | 2.3     | 3.0     | 3.2     | 5.7     | 0.2     | 0.5     | 2.4     | -14.5   | 3.3     | 6.8     | 7.1     | -4.9    | -18.0   | 9.1     | -0.2     | 15.9     | 6.1      | 8.3      | 14.6     |

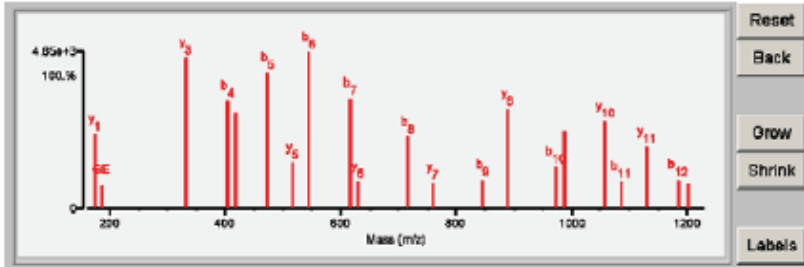

# N16

## Detailed Results

| Rank | Score | SPI (%) | BCS | # Unmatched Ions | Sequence                                      | MH <sup>+</sup> Calculated (Da) | MH <sup>+</sup> Error (Da) | MH <sup>+</sup> Error (ppm) | Protein MW (Da) | Species | Accession #                                     | MS-Digest Index # | Protein Name                                                       |
|------|-------|---------|-----|------------------|-----------------------------------------------|---------------------------------|----------------------------|-----------------------------|-----------------|---------|-------------------------------------------------|-------------------|--------------------------------------------------------------------|
| 1    | 10.23 | 58.2    | 8   | 11/25            | (A) L / S / A / Z / T E / S / B I / Y / R (A) | 1393.6416                       | -0.0033                    | -2.4                        | 23973.819.93    | HUMAN   | <a href="#">O14569</a><br><a href="#">59943</a> |                   | Cytochrome b561 domain-containing protein 2 - Homo sapiens (Human) |

  

| Fragment-ion (m/z)      | 86.094 | 136.077 | 174.086 | 175.115 | 183.108 | 271.109 | 290.126 | 338.176 | 342.145 | 388.662 | 460.242 | 488.210 | 519.761 | 553.289 <sup>+2</sup> | 588.306 | 588.761 | 596.792 | 597.279 | 607.250 | 610.273 | 675.366 | 804.358 | 905.441 | 1034.485 | 1192.551 |
|-------------------------|--------|---------|---------|---------|---------|---------|---------|---------|---------|---------|---------|---------|---------|-----------------------|---------|---------|---------|---------|---------|---------|---------|---------|---------|----------|----------|
| Frac. Inten. (% of TIC) | 0.14   | 0.09    | 3.08    | 7.61    | 3.41    | 4.40    | 3.38    | 2.72    | 5.15    | 3.02    | 3.45    | 4.20    | 3.24    | 4.06                  | 7.22    | 3.33    | 3.25    | 7.07    | 2.68    | 2.83    | 5.98    | 4.94    | 4.11    | 6.37     | 4.26     |
| Rel. Inten. (% of BP)   | 1.83   | 1.23    | 40.20   | 100.00  | 44.82   | 57.87   | 44.37   | 35.74   | 67.72   | 39.75   | 45.38   | 55.23   | 42.59   | 53.35                 | 94.87   | 43.81   | 42.69   | 92.94   | 35.28   | 37.16   | 78.58   | 64.87   | 54.06   | 83.71    | 55.94    |
| Score                   | 0.22   | 1.00    | -0.40   | 1.50    | -0.45   | 0.25    | -0.44   | 1.50    | 0.25    | -0.40   | -0.45   | -0.55   | -0.43   | 1.50                  | 1.50    | -0.44   | 1.50    | -0.93   | -0.35   | 0.50    | 1.50    | -0.65   | 1.50    | 1.50     | 1.50     |
| Ion-type                | LI     | Y       |         | y1      |         | b2-H2O  |         | y2      | b3-H2O  |         |         |         |         | y9 <sup>+2</sup>      | y4      |         | y++10   |         |         | b+++10  | y5      |         | y7      | y8       | y10      |
| Delta ppm               | -25.9  | 6.7     |         | -20.9   |         | -11.4   |         | -19.2   | -13.7   |         |         |         |         | 39.3                  | -33.1   |         | 14.3    |         |         | 6.9     | 13.2    |         | -7.2    | -5.0     | -7.2     |

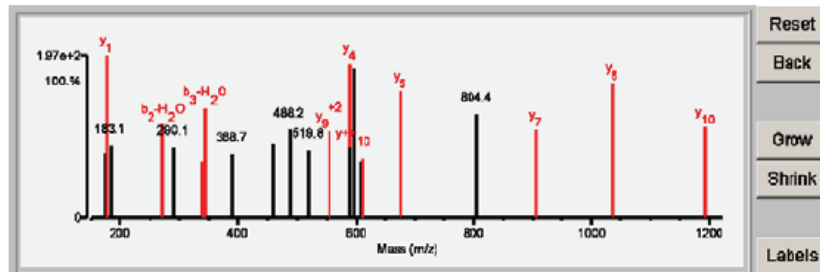



# N17

## Detailed Results

| Rank | Score | SPI (%) | BCS | # Unmatched Ions | Sequence                  | MH <sup>+</sup> Calculated (Da) | MH <sup>+</sup> Error (Da) | MH <sup>+</sup> Error (ppm) | Protein MW (Da) | Species | Accession # | MS-Digest Index # | Protein Name                                                          |
|------|-------|---------|-----|------------------|---------------------------|---------------------------------|----------------------------|-----------------------------|-----------------|---------|-------------|-------------------|-----------------------------------------------------------------------|
| 1    | 10.33 | 88.3    | 6   | 10/26            | (-) A/P E/V/L/P K/P R (M) | 1228.8188                       | 0.0004                     | 0.3                         | 8781.6/10.38    | HUMAN   | P09889      | 101889            | Cytochrome c oxidase polypeptide Vlc precursor - Homo sapiens (Human) |

  

| Fragment-Ion (m/z)      | 70.088 | 88.088 | 186.107 | 227.102 | 272.170 | 305.151 | 328.170 | 388.188 | 411.288 | 438.188 | 439.266 | 467.212 | 488.291 <sup>+2</sup> | 488.298 <sup>+2</sup> | 487.318 | 635.795 <sup>+2</sup> | 638.274          | 632.332 | 652.388 | 708.488 | 723.382 | 745.414 | 784.402 | 844.486 |       |
|-------------------------|--------|--------|---------|---------|---------|---------|---------|---------|---------|---------|---------|---------|-----------------------|-----------------------|---------|-----------------------|------------------|---------|---------|---------|---------|---------|---------|---------|-------|
| Frag. Inten. (% of TIC) | 0.01   | 0.04   | 3.16    | 8.38    | 1.94    | 1.15    | 8.31    | 4.31    | 1.12    | 1.31    | 2.35    | 1.18    | 7.27                  | 5.02                  | 6.05    | 5.00                  | 12.31            | 2.82    | 13.08   | 1.21    | 2.04    | 2.49    | 5.03    | 1.31    | 3.08  |
| Rel. Inten. (% of BP)   | 0.04   | 0.32   | 24.17   | 64.06   | 14.82   | 8.79    | 63.54   | 32.93   | 8.58    | 9.99    | 18.00   | 9.05    | 55.57                 | 38.36                 | 46.26   | 38.25                 | 94.08            | 21.57   | 100.00  | 9.25    | 15.60   | 19.07   | 38.47   | 10.01   | 23.56 |
| Score                   | 0.20   | 0.22   | 0.50    | 0.75    | 1.50    | -0.09   | 0.75    | 0.50    | 0.50    | -0.10   | 0.75    | 0.50    | -0.56                 | 0.50                  | -0.46   | -0.38                 | 1.50             | -0.22   | 1.50    | -0.09   | -0.16   | -0.19   | 1.50    | -0.10   | 1.50  |
| Ion-type                | PR     | LI     | PE-28   | PE      | Y2      |         | PEV     | b3      | EVLP-28 |         | EVLP    | a4      |                       | b4                    |         |                       | y8 <sup>+2</sup> |         | y4      |         |         | y5      | y6      |         |       |
| Delta ppm               | 6.8    | -4.9   | -10.1   | -8.9    | -5.7    |         | -6.0    | 0.4     | -6.6    |         | -2.1    | -1.8    | -3.0                  |                       |         |                       | 1.5              |         | -2.9    |         |         | -5.7    |         | -1.3    |       |

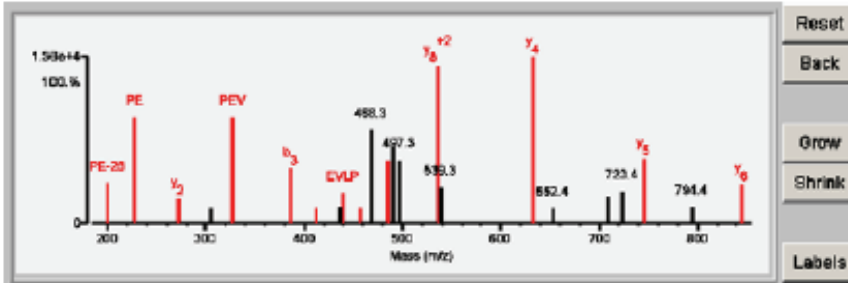

# N18

## Detailed Results

| Rank | Score | SPI (%) | BCS | # Unmatched Ions | Sequence                | MH <sup>+</sup> Calculated (Da) | MH <sup>+</sup> Error (Da) | MH <sup>+</sup> Error (ppm) | Protein MW (Da) | Species | Accession # | MS-Digest Index # | Protein Name                                                          |
|------|-------|---------|-----|------------------|-------------------------|---------------------------------|----------------------------|-----------------------------|-----------------|---------|-------------|-------------------|-----------------------------------------------------------------------|
| 1    | 12.16 | 78.2    | 6   | 9/26             | (A) P(E)V(L)P K/P R (M) | 1168.6788                       | 0.0031                     | 2.7                         | 8781.6/10.38    | HUMAN   | P09889      | 101888            | Cytochrome c oxidase polypeptide Vlc precursor - Homo sapiens (Human) |

  

| Fragment-Ion (m/z)      | 70.084 | 72.081 | 88.087 | 84.086 | 168.084 | 188.068 | 187.081 | 270.142 | 272.171 | 287.107 | 315.100 | 316.870 | 388.188 | 388.174 | 414.188 | 487.314 | 527.248 | 638.289 | 610.404 | 632.333 | 652.382 | 708.488 | 746.421 | 844.477 | 873.507 |
|-------------------------|--------|--------|--------|--------|---------|---------|---------|---------|---------|---------|---------|---------|---------|---------|---------|---------|---------|---------|---------|---------|---------|---------|---------|---------|---------|
| Frag. Inten. (% of TIC) | 0.00   | 0.04   | 0.04   | 1.16   | 3.91    | 10.93   | 1.26    | 0.81    | 1.54    | 1.42    | 17.19   | 0.73    | 0.63    | 3.72    | 12.81   | 7.63    | 1.71    | 4.76    | 2.60    | 15.97   | 1.95    | 1.03    | 5.51    | 1.74    | 0.92    |
| Rel. Inten. (% of BP)   | 0.01   | 0.23   | 0.24   | 6.72   | 22.74   | 63.57   | 7.30    | 4.74    | 8.94    | 8.24    | 100.00  | 4.27    | 3.65    | 21.61   | 74.48   | 44.36   | 9.92    | 27.71   | 15.10   | 92.90   | 11.37   | 5.97    | 32.06   | 10.12   | 5.33    |
| Score                   | 0.20   | 0.50   | 0.22   | -0.07  | 0.50    | 0.50    | -0.07   | -0.05   | 1.50    | 0.50    | 0.50    | 1.50    | -0.04   | 0.50    | 0.50    | -0.44   | 0.50    | -0.28   | -0.15   | 1.50    | -0.11   | -0.06   | 1.50    | 1.50    | 1.50    |
| Ion-type                | PR     | V      | LI     |        | a1      | b1      |         |         | y2      | a2      | b2      | y**4    |         | a3      | b3      |         | b4      |         |         | y4      |         |         | y5      | y6      | y7      |
| Delta ppm               | -10.4  | 8.7    | 3.2    |        | -5.1    | -9.3    |         |         | -1.9    | 0.3     | -7.0    | -1.9    |         | -4.2    | -5.9    |         | -9.7    |         |         | -0.8    |         |         | 4.7     | -10.4   | -22.6   |

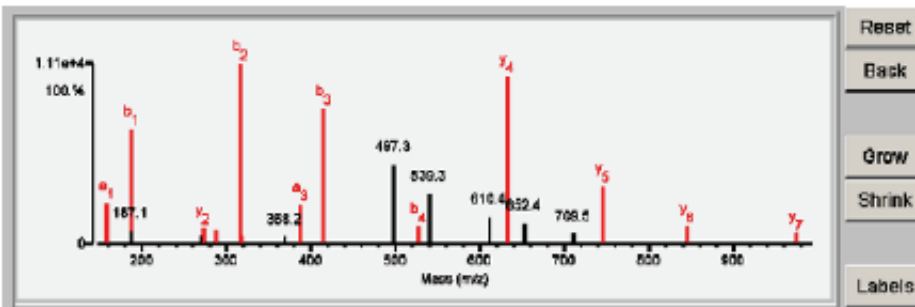



# N19

## Detailed Results

| Rank | Score | SP1 (%) | BCS | # Unmatched Ions | Sequence                          | MH+ Calculated (Da) | MH+ Error (Da) | MH+ Error (ppm) | Protein MW/pi (Da) | Species | Accession #            | MS-Digest Index #      | Protein Name                                                   |
|------|-------|---------|-----|------------------|-----------------------------------|---------------------|----------------|-----------------|--------------------|---------|------------------------|------------------------|----------------------------------------------------------------|
| 1    | 23.47 | 100.0   | 11  | 0/25             | (F) F/L/I/I/L/D/T/R/L/P/A/R/R (V) | 1480.7308           | 0.0053         | 3.8             | 14195.46.88        | HUMAN   | <a href="#">A8NHQ4</a> | <a href="#">131177</a> | D-dopachrome decarboxylase-like protein - Homo sapiens (Human) |
| 1    | 23.47 | 100.0   | 11  | 0/25             | (F) F/L/I/I/L/D/T/R/L/P/A/R/R (V) | 1480.7308           | 0.0053         | 3.8             | 12711.819.72       | HUMAN   | <a href="#">P30048</a> | <a href="#">143883</a> | D-dopachrome decarboxylase - Homo sapiens (Human)              |

  

| Fragment-Ion (m/z)      | 88.097 | 176.119 | 243.135 | 289.190 | 348.160 | 390.196 | 440.231 | 467.262 | 471.250 | 478.200 | 488.285 <sup>+2</sup> | 670.338 | 681.283 | 818.329 <sup>+2</sup> | 828.341 <sup>+2</sup> | 884.377 | 786.423 | 788.353 | 807.358 | 882.438 | 900.463 | 998.618 | 1013.638 | 1084.488 | 1142.678 |
|-------------------------|--------|---------|---------|---------|---------|---------|---------|---------|---------|---------|-----------------------|---------|---------|-----------------------|-----------------------|---------|---------|---------|---------|---------|---------|---------|----------|----------|----------|
| Frag. Inten. (% of TIC) | 0.26   | 1.76    | 4.75    | 0.85    | 7.41    | 0.94    | 1.14    | 24.37   | 1.15    | 10.23   | 0.94                  | 4.49    | 4.11    | 0.92                  | 0.95                  | 3.06    | 3.46    | 1.25    | 1.78    | 1.94    | 9.11    | 0.97    | 5.45     | 6.58     | 2.11     |
| Rel. Inten. (% of BP)   | 1.07   | 7.23    | 19.50   | 3.47    | 30.40   | 3.86    | 4.69    | 100.00  | 4.73    | 41.59   | 3.86                  | 18.44   | 16.85   | 3.77                  | 3.91                  | 12.57   | 14.19   | 5.13    | 7.31    | 7.98    | 37.37   | 3.97    | 22.37    | 27.02    | 8.66     |
| Score                   | 0.22   | 1.50    | 0.75    | 1.50    | 0.50    | 1.50    | 0.50    | 1.50    | 0.75    | 0.50    | 1.50                  | 0.50    | 0.50    | 1.50                  | 1.50                  | 1.50    | 1.50    | 0.25    | 0.50    | 0.50    | 1.50    | 0.50    | 1.50     | 0.50     | 1.50     |
| Ion-type                | LI     | Y1      | EL      | Y2      | b2      | Y3      | Y4-NH3  | Y4      | LELD    | b5      | Y5-H2O <sup>+2</sup>  | Y5      | b4      | Y11-H2O <sup>+2</sup> | Y11 <sup>+2</sup>     | Y6      | Y7      | b6-H2O  | b6      | Y8-H2O  | Y8      | Y9-NH3  | Y9       | b8       | Y10      |
| Delta ppm               | 6.7    | 0.3     | -0.9    | -6.5    | 1.3     | -12.2   | 12.5    | 0.1     | 7.8     | -3.0    | -4.2                  | 4.5     | -5.1    | -2.4                  | 7.7                   | -2.6    | -4.9    | 4.1     | -3.5    | -7.6    | -0.6    | 4.8     | 0.7      | -1.5     | -2.2     |

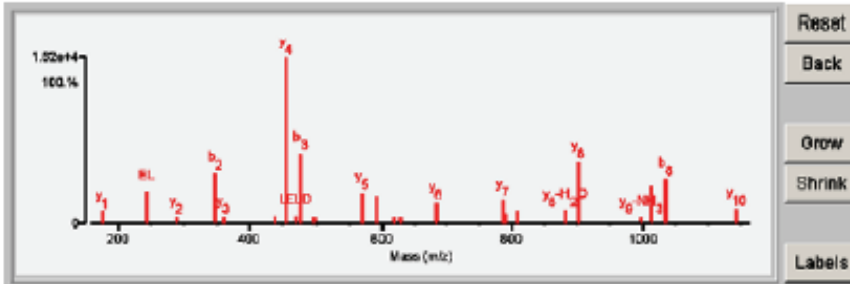

# N20

## Detailed Results

| Rank | Score | SP1 (%) | BCS | # Unmatched Ions | Sequence                                        | MH+ Calculated (Da) | MH+ Error (Da) | MH+ Error (ppm) | Protein MW/pi (Da) | Species | Accession #            | MS-Digest Index #      | Protein Name                                                        |
|------|-------|---------|-----|------------------|-------------------------------------------------|---------------------|----------------|-----------------|--------------------|---------|------------------------|------------------------|---------------------------------------------------------------------|
| 1    | 14.08 | 89.4    | 8   | 9/26             | (-) F Y   L   Y   E   M   V   D   T   V   R (I) | 1386.7011           | 0.0013         | 0.9             | 22918.014.47       | HUMAN   | <a href="#">Q9Y635</a> | <a href="#">538241</a> | DNA-directed RNA polymerase III subunit RPC8 - Homo sapiens (Human) |

  

| Fragment-Ion (m/z)      | 70.088 | 72.082 | 88.088 | 120.077 | 147.108 | 167.089 | 175.114 | 248.167 | 336.142 | 376.229 | 385.170 | 448.226 | 480.262 | 608.218 | 624.237 | 647.304 | 689.338 | 720.382 | 848.394 | 871.469 | 914.641 | 931.481 | 948.618 | 977.421 | 1081.678 |
|-------------------------|--------|--------|--------|---------|---------|---------|---------|---------|---------|---------|---------|---------|---------|---------|---------|---------|---------|---------|---------|---------|---------|---------|---------|---------|----------|
| Frag. Inten. (% of TIC) | 0.00   | 0.68   | 0.13   | 0.11    | 3.35    | 3.23    | 3.41    | 3.17    | 16.44   | 3.18    | 3.57    | 4.60    | 3.48    | 3.62    | 2.94    | 3.33    | 3.12    | 6.46    | 8.38    | 3.91    | 3.00    | 3.03    | 8.27    | 3.77    | 4.82     |
| Rel. Inten. (% of BP)   | 0.02   | 4.13   | 0.78   | 0.66    | 20.36   | 19.61   | 20.73   | 19.30   | 100.00  | 19.33   | 21.73   | 27.96   | 21.14   | 22.01   | 17.90   | 20.27   | 18.95   | 39.29   | 50.93   | 23.79   | 18.21   | 18.43   | 50.31   | 22.91   | 29.33    |
| Score                   | 0.20   | 0.50   | 0.22   | 1.00    | -0.20   | -0.20   | 1.50    | -0.19   | 0.50    | 1.50    | -0.22   | 0.50    | 1.50    | -0.22   | -0.18   | 0.50    | 1.50    | 1.50    | 1.50    | 1.50    | -0.24   | -0.18   | 0.50    | 1.50    | 1.50     |
| Ion-type                | PR     | V      | LI     | F       | Y1      | Y2      | Y3      | b2      | Y3      | Y4      | b3      | Y4      | Y4      | Y5      | b4      | Y5      | Y6      | Y6      | Y7      | Y7      | Y8      | Y8      | Y9-NH3  | Y9      | Y9       |
| Delta ppm               | 8.2    | 21.1   | 18.3   | -33.1   |         |         | -27.7   |         | -4.1    | -15.3   |         | -5.9    | -19.8   |         | 14.3    | 9.0     | 15.0    | -23.4   |         |         |         | 38.1    | 38.0    | 9.3     |          |

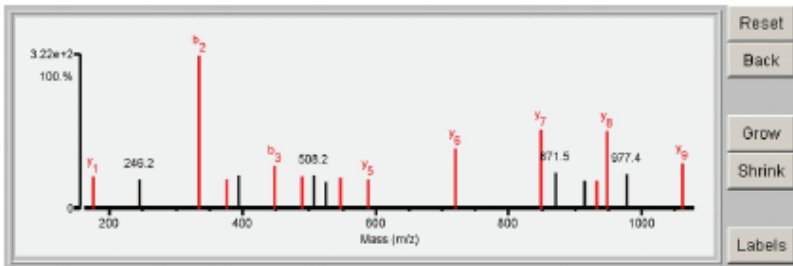

# N21

## Detailed Results

| Rank | Score | SPI (%) | BCS | # Unmatched Ions | Sequence                     | MH <sup>+</sup> Calculated (Da) | MH <sup>+</sup> Error (Da) | MH <sup>+</sup> Error (ppm) | Protein MW/pl (Da) | Species | Accession #            | MS-Digest Index #      | Protein Name                                             |
|------|-------|---------|-----|------------------|------------------------------|---------------------------------|----------------------------|-----------------------------|--------------------|---------|------------------------|------------------------|----------------------------------------------------------|
| 1    | 12.04 | 57.2    | 9   | 11/25            | (G)KID/Y/Y Q/T/L/G/L/A/R (G) | 1550.7130                       | 0.0305                     | 19.7                        | 38044.3/8.74       | HUMAN   | <a href="#">P25685</a> | <a href="#">141963</a> | DnaJ homolog subfamily B member 1 - Homo sapiens (Human) |

  

| Fragment-ion (m/z)     | 70.067 | 72.080 | 84.081 | 86.096 | 94.065 | 136.075 | 175.118 | 246.158 | 251.103 | 259.062 | 352.120 | 359.239 | 374.090 | 416.265 | 529.346 | 537.161 | 630.395 | 659.304 | 700.206 | 740.443 | 759.456 | 911.313 | 921.518 | 1084.582 | 1199.638 |
|------------------------|--------|--------|--------|--------|--------|---------|---------|---------|---------|---------|---------|---------|---------|---------|---------|---------|---------|---------|---------|---------|---------|---------|---------|----------|----------|
| Frac. Inten.(% of TIC) | 0.00   | 3.73   | 2.86   | 0.20   | 3.24   | 0.88    | 3.50    | 3.31    | 3.18    | 5.67    | 3.32    | 3.47    | 5.25    | 8.77    | 4.61    | 5.84    | 9.57    | 2.40    | 2.57    | 2.35    | 4.58    | 3.43    | 11.03   | 2.35     | 4.07     |
| Rel. Inten.(% of BP)   | 0.02   | 33.85  | 25.93  | 1.84   | 29.40  | 6.17    | 31.74   | 30.03   | 28.84   | 51.40   | 30.09   | 31.48   | 47.57   | 79.55   | 41.82   | 52.99   | 86.81   | 21.76   | 23.34   | 21.34   | 41.57   | 31.10   | 100.00  | 21.30    | 36.96    |
| Score                  | 0.20   | -0.34  | -0.26  | 0.22   | -0.29  | 1.00    | 1.50    | 1.50    | -0.29   | -0.51   | 0.50    | 1.50    | -0.48   | 1.50    | 1.50    | -0.53   | 1.50    | -0.22   | -0.23   | 0.50    | -0.42   | -0.31   | 1.50    | 1.50     | 1.50     |
| Ion-type               | PR     |        |        | LI     |        | Y       | y1      | y2      |         |         | b1      | y3      |         | y4      | y5      |         | y6      |         |         | y7-H2O  |         |         | y8      | y9       | y10      |
| Delta ppm              | 26.8   |        |        | -4.9   |        | -8.0    | -4.9    | 8.7     |         |         | 10.8    |         | -3.4    | 7.5     | 1.6     |         | 3.0     |         |         | 2.5     |         |         | 2.8     | 3.3      | 26.7     |

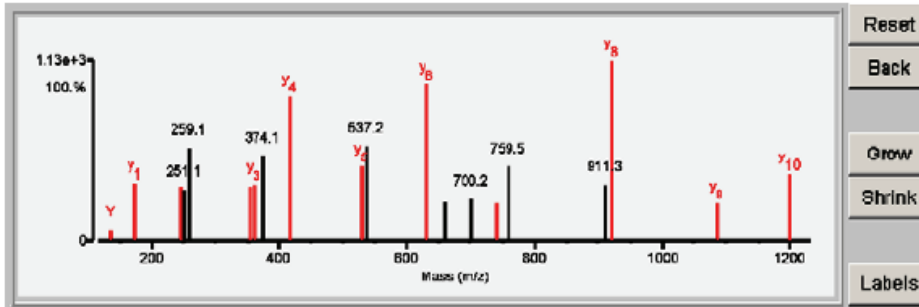

# N22

## Detailed Results

| Rank | Score | SPI (%) | BCS | # Unmatched Ions | Sequence                   | MH <sup>+</sup> Calculated (Da) | MH <sup>+</sup> Error (Da) | MH <sup>+</sup> Error (ppm) | Protein MW/pl (Da) | Species | Accession #            | MS-Digest Index #      | Protein Name                                             |
|------|-------|---------|-----|------------------|----------------------------|---------------------------------|----------------------------|-----------------------------|--------------------|---------|------------------------|------------------------|----------------------------------------------------------|
| 1    | 11.26 | 61.9    | 7   | 9/25             | (V)D Y/Y/E/V/L G/V/Q/R (H) | 1329.6144                       | 0.0096                     | 7.2                         | 36087.2/9.17       | HUMAN   | <a href="#">O75190</a> | <a href="#">141991</a> | DnaJ homolog subfamily B member 6 - Homo sapiens (Human) |

  

| Fragment-ion (m/z)     | 60.052 | 70.066 | 72.080 | 86.097 | 129.099 | 136.075 | 137.080 | 175.118 | 212.100 | 215.134 | 246.156 | 251.063 | 265.113 | 293.117 | 299.142 | 303.174 | 367.094 | 402.247 | 431.185 | 459.268 <sup>+2</sup> | 530.163 | 572.353 | 671.421 | 758.283 | 800.454 |
|------------------------|--------|--------|--------|--------|---------|---------|---------|---------|---------|---------|---------|---------|---------|---------|---------|---------|---------|---------|---------|-----------------------|---------|---------|---------|---------|---------|
| Frac. Inten.(% of TIC) | 2.54   | 0.00   | 0.13   | 0.53   | 0.07    | 0.73    | 3.14    | 5.55    | 2.49    | 2.72    | 2.49    | 3.38    | 2.73    | 4.37    | 3.91    | 3.24    | 4.59    | 2.84    | 2.83    | 14.59                 | 6.37    | 8.90    | 10.41   | 3.02    | 8.40    |
| Rel. Inten.(% of BP)   | 17.38  | 0.03   | 0.91   | 3.63   | 0.51    | 4.99    | 21.53   | 38.05   | 17.07   | 18.65   | 17.09   | 23.15   | 18.71   | 29.96   | 26.81   | 22.19   | 31.48   | 19.48   | 19.38   | 100.00                | 43.65   | 60.95   | 71.36   | 20.71   | 57.52   |
| Score                  | -0.17  | 0.20   | 0.50   | 0.22   | 0.20    | 1.00    | -0.22   | 1.50    | -0.17   | -0.19   | -0.17   | -0.23   | 0.50    | 0.75    | -0.27   | 1.50    | 0.50    | 1.50    | -0.19   | -1.00                 | 0.50    | 1.50    | 1.50    | 0.50    | 1.50    |
| Ion-type               | PR     |        | V      | LI     | RKQ     | Y       |         | y1      |         |         |         | YE-28   | YE      |         |         | y2      | b2      | y3      |         |                       | b3      | y5      | y6      | b5      | y7      |
| Delta ppm              | 5.3    |        | -6.6   | 3.2    | -27.4   | -5.8    |         | -6.0    |         |         |         | -22.9   | 9.6     |         |         | -11.0   | -6.9    | 3.1     |         |                       | 5.5     | 2.1     | 1.2     | 14.9    | -10.7   |

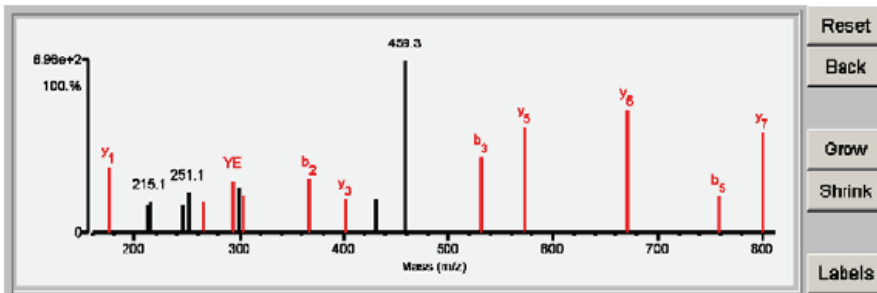

# N23

## Detailed Results

| Rank | Score | SPI (%) | BCS | # Unmatched Ions | Sequence                                | MH <sup>+</sup> Calculated (Da) | MH <sup>+</sup> Error (Da) | MH <sup>+</sup> Error (ppm) | Protein MW/pl (Da) | Species | Accession #            | MS-Digest Index #      | Protein Name                               |
|------|-------|---------|-----|------------------|-----------------------------------------|---------------------------------|----------------------------|-----------------------------|--------------------|---------|------------------------|------------------------|--------------------------------------------|
| 1    | 10.02 | 61.2    | 7   | 11/25            | (-) V V W I E / E / V / D / Q I / R (A) | 1179.5827                       | 0.0001                     | 0.0                         | 95338.7/6.41       | HUMAN   | <a href="#">P13639</a> | <a href="#">154511</a> | Elongation factor 2 - Homo sapiens (Human) |

  

| Fragment-ion (m/z)      | 60.044 | 70.067 | 72.081 | 84.043 | 86.096 | 87.055 | 110.071 | 120.079 | 160.078 | 175.114 | 188.076 | 234.118 | 302.113 | 345.156 | 357.203 | 399.218 | 416.264 | 463.249 <sup>+2</sup> | 523.289 | 531.286 | 630.350 | 653.305 | 731.406 | 765.307 | 878.464 |
|-------------------------|--------|--------|--------|--------|--------|--------|---------|---------|---------|---------|---------|---------|---------|---------|---------|---------|---------|-----------------------|---------|---------|---------|---------|---------|---------|---------|
| Frac. Inten. (% of TIC) | 3.62   | 0.01   | 0.25   | 8.68   | 0.49   | 0.19   | 2.78    | 0.20    | 11.44   | 5.92    | 5.59    | 3.05    | 4.25    | 2.79    | 3.09    | 4.11    | 2.58    | 2.78                  | 2.60    | 5.61    | 6.05    | 2.64    | 14.20   | 2.70    | 4.44    |
| Rel. Inten. (% of BP)   | 26.47  | 0.06   | 1.77   | 61.15  | 3.42   | 1.36   | 19.43   | 1.41    | 80.52   | 41.70   | 39.36   | 21.45   | 29.92   | 19.67   | 21.79   | 28.91   | 18.04   | 19.46                 | 18.29   | 39.50   | 42.58   | 18.60   | 100.00  | 18.99   | 31.29   |
| Score                   | -0.25  | 0.20   | 0.50   | -0.61  | 0.22   | 0.33   | -0.19   | 1.00    | 0.50    | 1.50    | 0.50    | -0.21   | 0.50    | -0.20   | -0.22   | -0.29   | 1.50    | -0.19                 | -0.18   | 1.50    | 1.50    | -0.19   | 1.50    | -0.19   | 1.50    |
| Ion-type                |        | PR     | V      |        | LI     | NR     |         | F       | a1      | y1      | b1      |         | b2      |         |         |         | y3      |                       |         | y4      | y5      |         | y6      | y7      |         |
| Delta ppm               |        | 19.6   | 3.1    |        | -0.3   | -4.5   |         | -13.1   | -15.4   | -28.3   | 6.0     |         | -18.2   |         |         |         | 6.5     |                       |         | -5.3    | -10.6   |         | 1.7     | -10.0   |         |

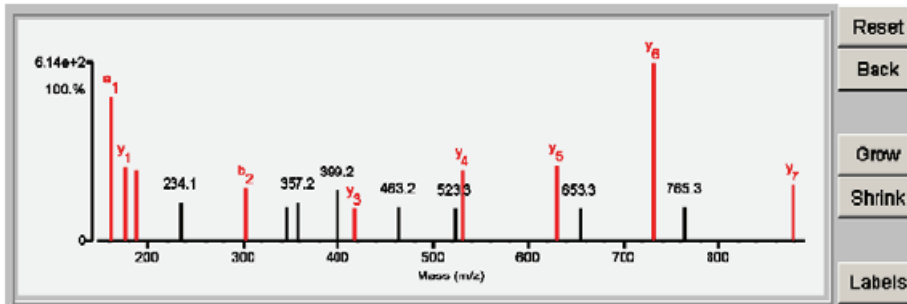

# N24

## Detailed Results

| Rank | Score | SPI (%) | BCS | # Unmatched Ions | Sequence                            | MH <sup>+</sup> Calculated (Da) | MH <sup>+</sup> Error (Da) | MH <sup>+</sup> Error (ppm) | Protein MW/pl (Da) | Species | Accession #            | MS-Digest Index #      | Protein Name                               |
|------|-------|---------|-----|------------------|-------------------------------------|---------------------------------|----------------------------|-----------------------------|--------------------|---------|------------------------|------------------------|--------------------------------------------|
| 1    | 18.18 | 84.2    | 6   | 8/25             | (V) N I T / T / V D / Q / I / R (A) | 1080.5143                       | 0.0067                     | 6.2                         | 96398.7/8.41       | HUMAN   | <a href="#">P13838</a> | <a href="#">164611</a> | Elongation factor 2 - Homo sapiens (Human) |

  

| Fragment-ion (m/z)      | 72.081 | 116.050 | 120.081 | 121.083 | 168.027 | 176.118 | 178.109 | 203.048 | 221.128 | 231.114             | 248.124 | 288.202 | 305.098 | 322.128 | 360.117 | 408.143 | 418.281                           | 430.738 <sup>+2</sup> | 433.154          | 439.740 <sup>+2</sup> | 451.186            | 614.268 | 830.367 | 731.404 | 878.473 |
|-------------------------|--------|---------|---------|---------|---------|---------|---------|---------|---------|---------------------|---------|---------|---------|---------|---------|---------|-----------------------------------|-----------------------|------------------|-----------------------|--------------------|---------|---------|---------|---------|
| Frac. Inten. (% of TIC) | 0.04   | 3.88    | 0.74    | 2.11    | 2.69    | 5.09    | 1.57    | 4.25    | 2.35    | 1.32                | 1.53    | 1.47    | 2.43    | 1.02    | 3.67    | 3.15    | 8.38                              | 2.60                  | 5.70             | 2.85                  | 1.81               | 1.01    | 19.32   | 16.52   | 4.10    |
| Rel. Inten. (% of BP)   | 0.21   | 20.07   | 3.83    | 10.52   | 13.91   | 25.35   | 8.15    | 22.02   | 12.15   | 6.94                | 7.93    | 7.59    | 12.57   | 5.28    | 19.00   | 16.38   | 43.37                             | 13.48                 | 29.50            | 14.75                 | 9.36               | 5.25    | 100.00  | 87.59   | 21.21   |
| Score                   | 0.50   | -0.20   | 1.00    | -0.11   | -0.14   | 1.50    | -0.08   | 0.50    | 0.50    | 0.75                | 1.50    | 0.50    | -0.13   | 0.50    | 0.50    | -0.15   | 1.50                              | 0.50                  | 0.25             | 1.50                  | 0.50               | 0.50    | 1.50    | 1.50    | 1.50    |
| Ion-type                |        | V       |         | F       |         | y1      |         | b1      | FT-28   | FT-H <sub>2</sub> O | FT      | y2      |         | b2      |         | y3      | y7+H <sub>2</sub> O <sup>+2</sup> | b3-H <sub>2</sub> O   | y7 <sup>+2</sup> | b3                    | y4-NH <sub>3</sub> | y5      | y6      | y7      |         |
| Delta ppm               |        | 7.3     |         | -2.3    |         | -4.9    |         | -6.3    | -5.2    | -1.3                | -2.7    | -1.8    |         | -0.6    | -3.1    | -1.4    | 1.7                               | -2.1                  | -0.8             | -2.2                  | -6.2               | -0.6    | -1.0    | -0.4    |         |

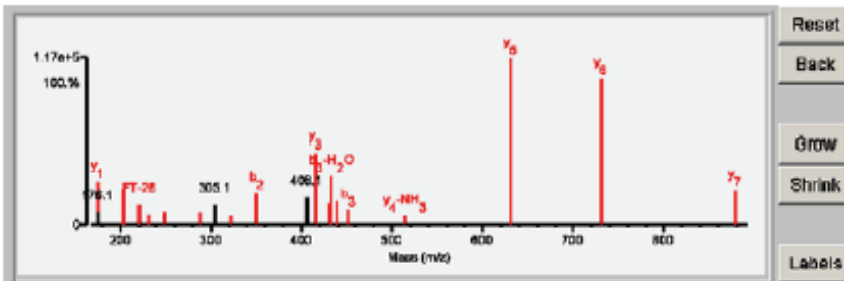

# N25

## Detailed Results

| Rank | Score | SPI (%) | BCS | # Unmatched Ions | Sequence                 | MH <sup>+</sup> Calculated (Da) | MH <sup>+</sup> Error (Da) | MH <sup>+</sup> Error (ppm) | Protein MW/pl (Da) | Species | Accession #            | MS-Digest Index #      | Protein Name                                                                |
|------|-------|---------|-----|------------------|--------------------------|---------------------------------|----------------------------|-----------------------------|--------------------|---------|------------------------|------------------------|-----------------------------------------------------------------------------|
| 1    | 14.94 | 68.2    | 7   | 10/25            | (-)KIP/I/L/L/Q/GH E/R(S) | 1413.7130                       | -0.0044                    | -3.1                        | 36502.0/5.38       | HUMAN   | <a href="#">Q13347</a> | <a href="#">160529</a> | Eukaryotic translation initiation factor 3 subunit I - Homo sapiens (Human) |

  

| Fragment-ion (m/z)     | 70.066 | 72.083 | 84.082 | 86.097 | 94.065 | 175.118 | 183.149 | 211.144 | 219.098 | 231.064 | 259.057 | 324.224 | 352.113 | 356.109 | 426.734          | 427.225 | 498.239 | 531.806 <sup>+2</sup> | 626.296 | 639.851 <sup>+2</sup> | 660.830 <sup>+2</sup> | 739.391 | 852.472 | 965.545 | 1062.600 |
|------------------------|--------|--------|--------|--------|--------|---------|---------|---------|---------|---------|---------|---------|---------|---------|------------------|---------|---------|-----------------------|---------|-----------------------|-----------------------|---------|---------|---------|----------|
| Frac. Inten.(% of TIC) | 0.01   | 2.38   | 3.35   | 0.25   | 2.08   | 1.49    | 3.57    | 2.06    | 1.66    | 1.98    | 2.87    | 2.76    | 5.96    | 2.32    | 1.52             | 2.00    | 2.25    | 21.38                 | 3.58    | 4.11                  | 8.99                  | 4.63    | 5.24    | 1.39    | 12.15    |
| Rel. Inten.(% of BP)   | 0.03   | 11.13  | 15.69  | 1.17   | 8.73   | 6.95    | 16.70   | 9.64    | 7.79    | 9.25    | 13.42   | 12.92   | 27.88   | 10.87   | 7.11             | 9.34    | 10.53   | 100.00                | 16.72   | 19.23                 | 42.06                 | 21.66   | 24.51   | 6.51    | 56.80    |
| Score                  | 0.20   | -0.11  | -0.16  | 0.22   | -0.10  | 1.50    | 0.50    | 0.75    | -0.08   | -0.09   | -0.13   | 0.75    | 0.50    | -0.11   | 1.50             | -0.09   | 1.50    | 1.50                  | 1.50    | 1.50                  | -0.19                 | -0.42   | 1.50    | 1.50    | 1.50     |
| Ion-type               | PR     |        |        | LI     |        | y1      | PI-28   | PI      |         |         |         | PIL     | b1      |         | y <sup>+</sup> 7 |         | y4      | y6 <sup>+2</sup>      | y5      |                       |                       | y6      | y7      | y8      | y9       |
| Delta ppm              |        | 6.8    |        | 2.0    |        | -6.8    | -6.5    | -7.1    |         |         |         | -16.2   | -8.3    |         | -9.7             |         | -6.3    | -0.5                  | -7.0    |                       |                       | 8.2     | 3.8     | -7.7    | -4.9     |

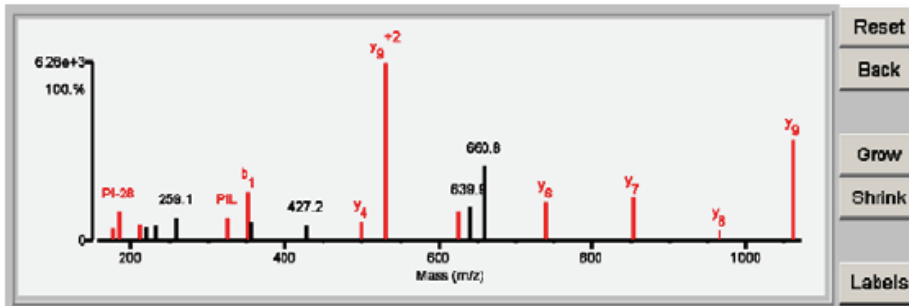

# N26

## Detailed Results

| Rank | Score | SPI (%) | BCS | # Unmatched Ions | Sequence                      | MH <sup>+</sup> Calculated (Da) | MH <sup>+</sup> Error (Da) | MH <sup>+</sup> Error (ppm) | Protein MW/pl (Da) | Species | Accession #            | MS-Digest Index #      | Protein Name                      |
|------|-------|---------|-----|------------------|-------------------------------|---------------------------------|----------------------------|-----------------------------|--------------------|---------|------------------------|------------------------|-----------------------------------|
| 1    | 11.16 | 62.0    | 8   | 11/25            | (P)A IIN/T/M/L/A/D/H A A/R(Q) | 1388.6483                       | 0.0126                     | 9.1                         | 123386.6/5.71      | HUMAN   | <a href="#">O14980</a> | <a href="#">705535</a> | Exportin-1 - Homo sapiens (Human) |

  

| Fragment-ion (m/z)     | 70.064 | 72.080 | 84.045 | 86.097 | 104.052 | 120.080 | 136.073 | 175.116 | 273.128 | 323.156 | 328.164 | 404.164 | 454.250 | 487.202 | 488.201 <sup>+2</sup> | 558.774 <sup>+2</sup> | 569.272 | 640.317 | 678.370 | 721.414 | 753.402 | 778.416 | 884.446 | 985.478 | 1116.517 |
|------------------------|--------|--------|--------|--------|---------|---------|---------|---------|---------|---------|---------|---------|---------|---------|-----------------------|-----------------------|---------|---------|---------|---------|---------|---------|---------|---------|----------|
| Frac. Inten.(% of TIC) | 0.00   | 4.65   | 3.48   | 0.93   | 5.43    | 4.00    | 2.91    | 3.82    | 8.54    | 2.78    | 2.66    | 3.17    | 6.68    | 2.30    | 2.50                  | 3.77                  | 3.26    | 9.47    | 2.85    | 2.85    | 6.06    | 3.98    | 5.55    | 5.84    | 2.73     |
| Rel. Inten.(% of BP)   | 0.03   | 48.00  | 36.70  | 9.85   | 57.36   | 42.27   | 30.76   | 40.36   | 90.16   | 29.12   | 28.13   | 33.44   | 69.47   | 24.28   | 26.39                 | 39.85                 | 34.47   | 100.00  | 30.13   | 30.09   | 64.03   | 42.07   | 58.62   | 61.68   | 28.79    |
| Score                  | 0.20   | -0.48  | -0.37  | 0.22   | -0.57   | -0.42   | -0.31   | 1.50    | 0.50    | -0.29   | -0.28   | 0.50    | 1.50    | 0.25    | -0.28                 | 1.50                  | 1.50    | 1.50    | -0.30   | -0.30   | 1.50    | -0.42   | 1.50    | 1.50    | 1.50     |
| Ion-type               | PR     |        |        | LI     |         |         |         | y1      | b2      |         |         | b3      | y4      | b4-H2O  |                       | y10 <sup>+2</sup>     | y5      | y6      |         |         |         | y7      | y8      | y9      | y10      |
| Delta ppm              |        | -13.2  |        | 12.5   |         |         |         | -15.7   | 1.0     |         |         | -9.7    | -4.6    | -7.9    |                       | 11.2                  | -12.2   | 0.7     |         |         | 1.7     | 6.3     | -10.7   | -10.6   |          |

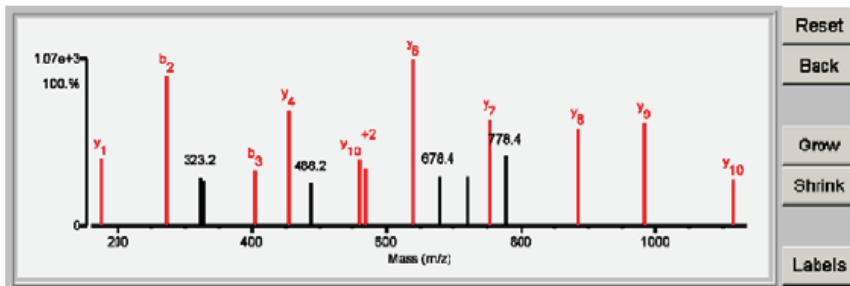

# N27

## Detailed Results

| Rank | Score | SPI (%) | BCS | # Unmatched Ions | Sequence          | MH <sup>+</sup> Calculated (Da) | MH <sup>+</sup> Error (Da) | MH <sup>+</sup> Error (ppm) | Protein MWpl (Da) | Species | Accession #             | MS-Digest Index #      | Protein Name                                          |
|------|-------|---------|-----|------------------|-------------------|---------------------------------|----------------------------|-----------------------------|-------------------|---------|-------------------------|------------------------|-------------------------------------------------------|
| 1    | 11.34 | 62.9    | 4   | 8/25             | (V)KIP/LN V/R (S) | 949.4746                        | 0.0025                     | 2.6                         | 191615.715.48     | HUMAN   | <a href="#">RQ00610</a> | <a href="#">87338</a>  | REVERSE Clathrin heavy chain 1 - Homo sapiens (Human) |
| 1    | 11.34 | 62.9    | 4   | 8/25             | (V)KIP/LN V/R (S) | 949.4746                        | 0.0025                     | 2.6                         | 187031.05.57      | HUMAN   | <a href="#">RP53675</a> | <a href="#">87344</a>  | REVERSE Clathrin heavy chain 2 - Homo sapiens (Human) |
| 1    | 11.34 | 62.9    | 4   | 8/25             | (P)KIP/LN V/R (V) | 949.4746                        | 0.0025                     | 2.6                         | 69413.2/5.94      | HUMAN   | <a href="#">P15311</a>  | <a href="#">172147</a> | Ezrin - Homo sapiens (Human)                          |
| 1    | 11.34 | 62.9    | 4   | 8/25             | (P)KIP/LN V/R (V) | 949.4746                        | 0.0025                     | 2.6                         | 68564.2/6.03      | HUMAN   | <a href="#">P35241</a>  | <a href="#">466757</a> | Radixin - Homo sapiens (Human)                        |

  

| Fragment-ion (m/z)      | 70.065 | 72.080 | 84.081 | 86.096 | 94.066 | 116.054 | 129.099 | 160.025 | 175.116 | 183.149 | 186.122 | 211.144 | 214.116 | 219.095 | 231.060 | 259.057 | 299.688 | 325.184 | 352.116 | 371.201 | 388.230 | 501.312 | 581.337 | 598.367 | 856.410 |
|-------------------------|--------|--------|--------|--------|--------|---------|---------|---------|---------|---------|---------|---------|---------|---------|---------|---------|---------|---------|---------|---------|---------|---------|---------|---------|---------|
| Frac. Inten. (% of TIC) | 0.01   | 0.04   | 8.66   | 0.06   | 12.73  | 3.01    | 0.04    | 1.16    | 2.47    | 4.48    | 1.66    | 2.02    | 1.85    | 1.79    | 3.79    | 1.48    | 14.30   | 3.06    | 2.40    | 1.48    | 5.01    | 4.62    | 1.70    | 18.20   | 4.54    |
| Rel. Inten. (% of BP)   | 0.08   | 0.21   | 47.03  | 0.26   | 69.94  | 18.53   | 0.22    | 6.37    | 13.58   | 24.60   | 8.66    | 11.12   | 9.07    | 9.84    | 20.85   | 8.12    | 78.56   | 16.76   | 13.18   | 8.04    | 27.50   | 24.81   | 9.38    | 100.00  | 24.86   |
| Score                   | 0.20   | 0.50   | -0.47  | 0.22   | -0.70  | -0.17   | 0.20    | -0.06   | 1.50    | 0.60    | 0.60    | 0.75    | 0.75    | -0.10   | -0.21   | -0.08   | 1.50    | 0.75    | 0.50    | 1.50    | 1.50    | 1.50    | 1.50    | 1.50    | -0.25   |
| Ion-type                | PR     | V      |        | LI     |        |         | RKQ     |         | y1      | PI-28   | NV-28   | PI      | NV      |         |         |         | y++5    | PIN     | b1      | y3-NH3  | y3      | y4      | y5-NH3  | y6      |         |
| Delta ppm               | 3.9    | -12.1  |        | -3.8   |        |         | -25.1   |         | -18.0   | -6.4    | -16.1   | -6.2    | -16.9   |         |         |         | 1.0     | -12.4   | 0.3     | -7.7    | -1.5    | -4.3    | -6.3    | -0.2    |         |

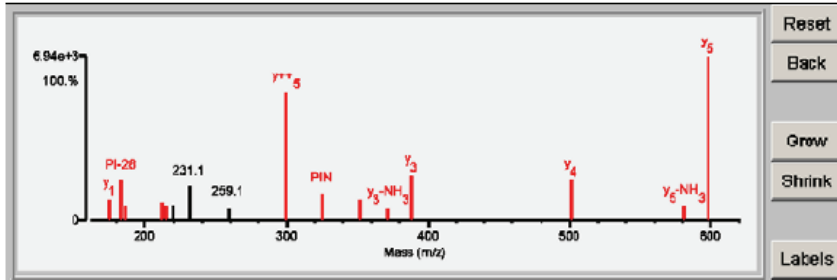

# N28

## Detailed Results

| Rank | Score | SPI (%) | BCS | # Unmatched Ions | Sequence                         | MH <sup>+</sup> Calculated (Da) | MH <sup>+</sup> Error (Da) | MH <sup>+</sup> Error (ppm) | Protein MWpl (Da) | Species | Accession #            | MS-Digest Index #      | Protein Name                                 |
|------|-------|---------|-----|------------------|----------------------------------|---------------------------------|----------------------------|-----------------------------|-------------------|---------|------------------------|------------------------|----------------------------------------------|
| 1    | 10.70 | 60.1    | 8   | 9/25             | (A)VGNIINE/LPENILLELFTHV/PAR (Q) | 2576.3541                       | 0.0014                     | 0.6                         | 29746.9/5.52      | HUMAN   | <a href="#">Q9HAM3</a> | <a href="#">179237</a> | F-box only protein 44 - Homo sapiens (Human) |

  

| Fragment-ion (m/z)      | 72.080 | 86.096 | 160.079 | 188.073 | 244.095 | 341.145 | 343.204 | 359.137 | 442.280 | 454.217 | 457.686 <sup>+2</sup> | 472.217 | 495.234 | 698.291 | 714.307 | 756.727 | 777.937 | 874.982 | 875.496 <sup>+2</sup> | 931.530 <sup>+2</sup> | 948.979 | 1003.071 | 1043.236 | 1053.060 <sup>+2</sup> | 1110.133 |
|-------------------------|--------|--------|---------|---------|---------|---------|---------|---------|---------|---------|-----------------------|---------|---------|---------|---------|---------|---------|---------|-----------------------|-----------------------|---------|----------|----------|------------------------|----------|
| Frac. Inten. (% of TIC) | 0.18   | 0.37   | 3.51    | 5.52    | 2.57    | 2.62    | 2.52    | 5.13    | 2.43    | 2.70    | 2.85                  | 5.55    | 2.20    | 2.65    | 3.08    | 2.79    | 4.03    | 2.99    | 15.85                 | 5.05                  | 2.37    | 2.29     | 3.27     | 14.04                  | 3.53     |
| Rel. Inten. (% of BP)   | 1.14   | 2.33   | 22.16   | 34.81   | 16.19   | 15.89   | 15.91   | 32.37   | 15.34   | 17.02   | 17.98                 | 35.04   | 13.90   | 16.74   | 19.42   | 17.60   | 25.43   | 18.88   | 100.00                | 31.88                 | 14.95   | 14.48    | 20.65    | 88.58                  | 22.30    |
| Score                   | 0.50   | 0.22   | 0.60    | 0.50    | 0.75    | 0.75    | 1.50    | 0.50    | 1.60    | 0.75    | -0.18                 | 0.50    | -0.14   | 0.25    | -0.19   | -0.18   | -0.25   | 1.50    | -1.00                 | 1.50                  | 0.50    | -0.14    | -0.21    | 1.50                   | -0.22    |
| Ion-type                | V      | LI     | ai      | b1      | EN      | PEN     | y3      | b3      | y4      | PENI    | ba                    | ba      | be-NH3  |         |         |         | y++15   |         |                       | y16 <sup>+2</sup>     | b++16   |          |          | y18 <sup>+2</sup>      |          |
| Delta ppm               | -13.5  | -6.1   | -6.6    | -8.9    | 4.1     | -6.0    | -13.5   | -6.8    | 6.9     | -30.0   |                       | -13.2   |         | 12.7    |         |         |         | -7.5    |                       | -0.3                  | -14.9   |          |          | -12.8                  |          |

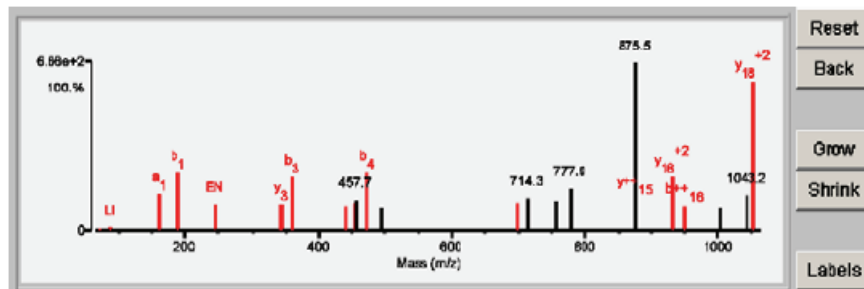

# N29

## Detailed Results

| Rank | Score | SPI (%) | BCS | # Unmatched Ions | Sequence               | MH <sup>+</sup> Calculated (Da) | MH <sup>+</sup> Error (Da) | MH <sup>+</sup> Error (ppm) | Protein MW pI (Da) | Species | Accession # | MS-Digest Index # | Protein Name                                    |
|------|-------|---------|-----|------------------|------------------------|---------------------------------|----------------------------|-----------------------------|--------------------|---------|-------------|-------------------|-------------------------------------------------|
| 1    | 19.84 | 98.4    | 8   | 2/25             | (G)YQIVIEITLISPGDGR(T) | 1346.9418                       | 0.0083                     | 6.2                         | 11960.817.88       | HUMAN   | P62942      | 183477            | FK506-binding protein 1A - Homo sapiens (Human) |

  

| Fragment-ion (m/z)      | 101.072 | 160.080 | 188.078 | 228.185 | 232.144 | 318.136 | 330.188 | 357.179 | 416.203 | 440.212 | 601.240 | 644.246 | 661.778 <sup>+2</sup>              | 670.786 <sup>+2</sup> | 678.780 <sup>+2</sup> | 688.274             | 827.284 | 845.283 | 701.358             | 740.370 | 802.408 | 846.408             | 813.490 | 831.450 | 1030.521 |
|-------------------------|---------|---------|---------|---------|---------|---------|---------|---------|---------|---------|---------|---------|------------------------------------|-----------------------|-----------------------|---------------------|---------|---------|---------------------|---------|---------|---------------------|---------|---------|----------|
| Frac. Inten. (% of TIC) | 0.10    | 2.09    | 4.30    | 0.86    | 2.57    | 14.69   | 0.76    | 1.39    | 6.05    | 0.76    | 10.20   | 3.36    | 0.85                               | 2.38                  | 0.84                  | 13.60               | 5.08    | 2.07    | 4.15                | 4.27    | 6.30    | 1.15                | 0.96    | 6.58    | 2.62     |
| Rel. Inten. (% of BP)   | 0.67    | 14.22   | 29.29   | 5.85    | 17.48   | 100.00  | 5.17    | 9.45    | 54.84   | 5.14    | 69.46   | 22.88   | 5.80                               | 16.23                 | 5.59                  | 92.58               | 34.60   | 14.12   | 28.22               | 29.07   | 42.91   | 7.93                | 6.51    | 44.82   | 17.84    |
| Score                   | 0.50    | 0.50    | 0.50    | 0.75    | 1.50    | 0.50    | 0.75    | 0.75    | 0.50    | -0.05   | 1.50    | 0.50    | -0.06                              | 0.50                  | 1.50                  | 1.50                | 0.25    | 0.50    | 1.50                | 0.25    | 1.50    | 0.50                | 0.50    | 1.50    | 1.50     |
| Ion-type                | QK      | a1      | b1      | QV      | y2      | b2      | VET     | QVE     | b3      | y2      | b4      | y6      | y11-H <sub>2</sub> O <sup>+2</sup> | y11 <sup>+2</sup>     | y6                    | b5-H <sub>2</sub> O | b6      | y7      | b6-H <sub>2</sub> O | y8      | b7      | y9-H <sub>2</sub> O | y9      | y10     |          |
| Delta ppm               | 12.5    | 0.3     | 4.9     | -2.0    | 14.6    | 2.7     | 4.1     | 2.1     | 2.7     | 2.2     | 0.6     |         |                                    | -0.7                  | -1.6                  | 1.2                 | 2.9     | 0.3     | 0.7                 | 5.2     | 0.3     | -0.5                | -8.5    | 1.8     | 4.6      |

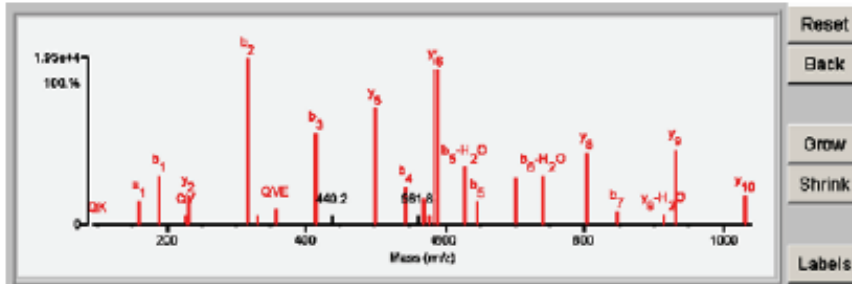

# N30

## Detailed Results

| Rank | Score | SPI (%) | BCS | # Unmatched Ions | Sequence              | MH <sup>+</sup> Calculated (Da) | MH <sup>+</sup> Error (Da) | MH <sup>+</sup> Error (ppm) | Protein MW pI (Da) | Species | Accession # | MS-Digest Index # | Protein Name                                    |
|------|-------|---------|-----|------------------|-----------------------|---------------------------------|----------------------------|-----------------------------|--------------------|---------|-------------|-------------------|-------------------------------------------------|
| 1    | 17.34 | 85.2    | 8   | 5/25             | (V)QIVIEITLISPGDGR(T) | 1246.5732                       | 0.0009                     | 0.7                         | 11950.817.88       | HUMAN   | P62942      | 183477            | FK506-binding protein 1A - Homo sapiens (Human) |

  

| Fragment-ion (m/z)      | 70.063 | 72.082 | 84.044 | 86.099 | 102.087 | 172.038 | 175.122 | 201.138 | 217.066 | 229.115 | 232.137 | 312.152              | 316.138 | 330.167 | 464.229 | 501.237             | 528.202 | 546.214 | 588.266 | 701.344 | 747.265 | 802.403 | 913.435             | 931.442 | 1030.502 |
|-------------------------|--------|--------|--------|--------|---------|---------|---------|---------|---------|---------|---------|----------------------|---------|---------|---------|---------------------|---------|---------|---------|---------|---------|---------|---------------------|---------|----------|
| Frac. Inten. (% of TIC) | 0.00   | 0.15   | 0.08   | 0.12   | 2.07    | 4.70    | 2.18    | 2.38    | 17.69   | 3.59    | 4.05    | 3.42                 | 3.11    | 3.18    | 3.47    | 5.47                | 6.58    | 2.40    | 12.48   | 4.72    | 2.13    | 6.79    | 2.61                | 5.81    | 2.81     |
| Rel. Inten. (% of BP)   | 0.01   | 0.84   | 0.43   | 0.66   | 11.71   | 26.58   | 12.35   | 13.48   | 100.00  | 20.31   | 22.91   | 19.31                | 17.60   | 17.97   | 19.60   | 30.91               | 31.55   | 13.55   | 70.57   | 26.68   | 12.03   | 32.74   | 14.78               | 32.86   | 15.91    |
| Score                   | 0.20   | 0.50   | 1.00   | 0.22   | -0.12   | -0.27   | 1.50    | -0.13   | 0.50    | 0.75    | 1.50    | 0.50                 | 0.50    | 0.75    | -0.20   | 1.50                | 0.25    | 0.50    | 1.50    | 1.50    | -0.12   | 1.50    | 0.50                | 1.50    | 1.50     |
| Ion-type                | PR     | V      | E      | LI     |         | y1      | b1      | VE      | b1      | VE      | y2      | VET-H <sub>2</sub> O | b2      | b++5    | y6      | b4-H <sub>2</sub> O | b4      | y6      | b4      | y6      | y7      | y6      | y9-H <sub>2</sub> O | y9      | y10      |
| Delta ppm               | -31.8  | 10.0   | -1.1   | 31.1   |         | 15.7    |         |         | 5.4     | -17.4   | -14.3   | -14.4                | 14.4    |         | -9.2    | -20.7               | -18.3   | -12.6   | -20.1   |         | -3.4    | -2.2    | -6.3                | -13.8   |          |

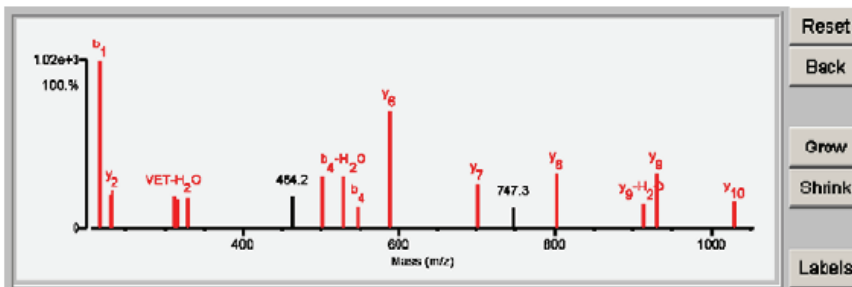

# N31

## Detailed Results

| Rank                                                                                                                                                                                                                                                                                                                                                                                                                                                                                                                                                                                                                                                                                                                                                                                                                                                                                                                                                                                                                                                                                                                                                                                                                                                                                                                                                                                                                                                                                                                                                                                                                                                                                                                                                                                                                                                                                                                                                                                                                                                                                                                                                                                                                                                                                                                            | Score  | SPI (%) | BCS     | # Unmatched Ions | Sequence                              | MH <sup>+</sup> Calculated (Da) | MH <sup>+</sup> Error (Da) | MH <sup>+</sup> Error (ppm) | Protein MW/pl (Da) | Species | Accession #            | MS-Digest Index #      | Protein Name                               |                    |         |         |         |         |         |          |          |          |          |          |          |         |         |         |         |         |         |         |         |          |          |          |          |          |          |                        |      |      |      |      |      |      |      |       |      |      |      |      |      |      |      |      |      |      |      |      |      |      |      |      |      |                      |      |      |      |      |      |       |       |        |       |       |      |       |       |       |       |       |       |       |       |       |      |       |       |      |      |       |      |      |      |      |      |      |      |      |      |      |       |      |       |      |      |       |      |      |       |      |       |      |      |       |       |          |   |    |    |    |    |    |    |    |    |    |  |    |  |    |    |  |    |    |  |     |  |    |     |  |  |           |      |      |       |     |      |      |      |      |      |      |  |       |  |      |     |  |      |      |  |      |  |       |      |  |  |
|---------------------------------------------------------------------------------------------------------------------------------------------------------------------------------------------------------------------------------------------------------------------------------------------------------------------------------------------------------------------------------------------------------------------------------------------------------------------------------------------------------------------------------------------------------------------------------------------------------------------------------------------------------------------------------------------------------------------------------------------------------------------------------------------------------------------------------------------------------------------------------------------------------------------------------------------------------------------------------------------------------------------------------------------------------------------------------------------------------------------------------------------------------------------------------------------------------------------------------------------------------------------------------------------------------------------------------------------------------------------------------------------------------------------------------------------------------------------------------------------------------------------------------------------------------------------------------------------------------------------------------------------------------------------------------------------------------------------------------------------------------------------------------------------------------------------------------------------------------------------------------------------------------------------------------------------------------------------------------------------------------------------------------------------------------------------------------------------------------------------------------------------------------------------------------------------------------------------------------------------------------------------------------------------------------------------------------|--------|---------|---------|------------------|---------------------------------------|---------------------------------|----------------------------|-----------------------------|--------------------|---------|------------------------|------------------------|--------------------------------------------|--------------------|---------|---------|---------|---------|---------|----------|----------|----------|----------|----------|----------|---------|---------|---------|---------|---------|---------|---------|---------|----------|----------|----------|----------|----------|----------|------------------------|------|------|------|------|------|------|------|-------|------|------|------|------|------|------|------|------|------|------|------|------|------|------|------|------|------|----------------------|------|------|------|------|------|-------|-------|--------|-------|-------|------|-------|-------|-------|-------|-------|-------|-------|-------|-------|------|-------|-------|------|------|-------|------|------|------|------|------|------|------|------|------|------|-------|------|-------|------|------|-------|------|------|-------|------|-------|------|------|-------|-------|----------|---|----|----|----|----|----|----|----|----|----|--|----|--|----|----|--|----|----|--|-----|--|----|-----|--|--|-----------|------|------|-------|-----|------|------|------|------|------|------|--|-------|--|------|-----|--|------|------|--|------|--|-------|------|--|--|
| 1                                                                                                                                                                                                                                                                                                                                                                                                                                                                                                                                                                                                                                                                                                                                                                                                                                                                                                                                                                                                                                                                                                                                                                                                                                                                                                                                                                                                                                                                                                                                                                                                                                                                                                                                                                                                                                                                                                                                                                                                                                                                                                                                                                                                                                                                                                                               | 15.54  | 79.2    | 12      | 7/25             | (G) I QGVDAVKLILIA/DVVA/P S A I/R (E) | 1959.0554                       | 0.0095                     | 4.8                         | 42593.2/8.80       | HUMAN   | <a href="#">P39748</a> | <a href="#">180389</a> | Flap endonuclease 1 - Homo sapiens (Human) |                    |         |         |         |         |         |          |          |          |          |          |          |         |         |         |         |         |         |         |         |          |          |          |          |          |          |                        |      |      |      |      |      |      |      |       |      |      |      |      |      |      |      |      |      |      |      |      |      |      |      |      |      |                      |      |      |      |      |      |       |       |        |       |       |      |       |       |       |       |       |       |       |       |       |      |       |       |      |      |       |      |      |      |      |      |      |      |      |      |      |       |      |       |      |      |       |      |      |       |      |       |      |      |       |       |          |   |    |    |    |    |    |    |    |    |    |  |    |  |    |    |  |    |    |  |     |  |    |     |  |  |           |      |      |       |     |      |      |      |      |      |      |  |       |  |      |     |  |      |      |  |      |  |       |      |  |  |
| <table border="1"> <thead> <tr> <th>Fragment-ion (m/z)</th> <th>72.081</th><th>86.098</th><th>101.068</th><th>175.119</th><th>330.153</th><th>387.171</th><th>500.252</th><th>543.324</th><th>571.289</th><th>614.361</th><th>643.251</th><th>713.423</th><th>741.346</th><th>828.452</th><th>834.404</th><th>854.417</th><th>899.491</th><th>947.485</th><th>967.507</th><th>1012.574</th><th>1038.539</th><th>1060.558</th><th>1125.659</th><th>1295.699</th><th>1366.734</th> </tr> </thead> <tbody> <tr> <td>Frac. Inten.(% of TIC)</td> <td>0.03</td><td>0.04</td><td>0.04</td><td>1.72</td><td>1.35</td><td>7.38</td><td>4.89</td><td>17.59</td><td>7.64</td><td>6.10</td><td>1.34</td><td>2.87</td><td>6.78</td><td>4.63</td><td>2.62</td><td>5.17</td><td>7.72</td><td>3.10</td><td>3.79</td><td>6.31</td><td>1.25</td><td>2.34</td><td>2.85</td><td>1.11</td><td>1.35</td> </tr> <tr> <td>Rel. Inten.(% of BP)</td> <td>0.17</td><td>0.25</td><td>0.22</td><td>9.80</td><td>7.66</td><td>41.94</td><td>27.78</td><td>100.00</td><td>43.46</td><td>34.66</td><td>7.62</td><td>16.31</td><td>38.45</td><td>26.34</td><td>14.87</td><td>29.42</td><td>43.88</td><td>17.64</td><td>21.53</td><td>35.88</td><td>7.12</td><td>13.31</td><td>16.20</td><td>6.29</td><td>7.87</td> </tr> <tr> <td>Score</td> <td>0.60</td><td>0.22</td><td>0.50</td><td>1.50</td><td>0.50</td><td>0.50</td><td>0.50</td><td>1.50</td><td>0.50</td><td>1.50</td><td>-0.08</td><td>1.50</td><td>-0.38</td><td>1.50</td><td>0.50</td><td>-0.29</td><td>1.50</td><td>0.50</td><td>-0.22</td><td>1.50</td><td>-0.07</td><td>0.50</td><td>1.50</td><td>-0.08</td><td>-0.08</td> </tr> <tr> <td>Ion-type</td> <td>V</td><td>LI</td><td>QK</td><td>y1</td><td>b2</td><td>b3</td><td>b4</td><td>y5</td><td>b5</td><td>y6</td><td></td><td>y7</td><td></td><td>y8</td><td>b6</td><td></td><td>y9</td><td>b7</td><td></td><td>y10</td><td></td><td>b8</td><td>y11</td><td></td><td></td> </tr> <tr> <td>Delta ppm</td> <td>-3.8</td><td>14.8</td><td>-32.0</td><td>2.0</td><td>10.9</td><td>-0.7</td><td>-6.5</td><td>-1.0</td><td>-4.8</td><td>-1.8</td><td></td><td>-11.0</td><td></td><td>-6.4</td><td>3.4</td><td></td><td>-3.9</td><td>-0.4</td><td></td><td>-4.2</td><td></td><td>-10.4</td><td>-2.9</td><td></td><td></td> </tr> </tbody> </table> |        |         |         |                  |                                       |                                 |                            |                             |                    |         |                        |                        |                                            | Fragment-ion (m/z) | 72.081  | 86.098  | 101.068 | 175.119 | 330.153 | 387.171  | 500.252  | 543.324  | 571.289  | 614.361  | 643.251  | 713.423 | 741.346 | 828.452 | 834.404 | 854.417 | 899.491 | 947.485 | 967.507 | 1012.574 | 1038.539 | 1060.558 | 1125.659 | 1295.699 | 1366.734 | Frac. Inten.(% of TIC) | 0.03 | 0.04 | 0.04 | 1.72 | 1.35 | 7.38 | 4.89 | 17.59 | 7.64 | 6.10 | 1.34 | 2.87 | 6.78 | 4.63 | 2.62 | 5.17 | 7.72 | 3.10 | 3.79 | 6.31 | 1.25 | 2.34 | 2.85 | 1.11 | 1.35 | Rel. Inten.(% of BP) | 0.17 | 0.25 | 0.22 | 9.80 | 7.66 | 41.94 | 27.78 | 100.00 | 43.46 | 34.66 | 7.62 | 16.31 | 38.45 | 26.34 | 14.87 | 29.42 | 43.88 | 17.64 | 21.53 | 35.88 | 7.12 | 13.31 | 16.20 | 6.29 | 7.87 | Score | 0.60 | 0.22 | 0.50 | 1.50 | 0.50 | 0.50 | 0.50 | 1.50 | 0.50 | 1.50 | -0.08 | 1.50 | -0.38 | 1.50 | 0.50 | -0.29 | 1.50 | 0.50 | -0.22 | 1.50 | -0.07 | 0.50 | 1.50 | -0.08 | -0.08 | Ion-type | V | LI | QK | y1 | b2 | b3 | b4 | y5 | b5 | y6 |  | y7 |  | y8 | b6 |  | y9 | b7 |  | y10 |  | b8 | y11 |  |  | Delta ppm | -3.8 | 14.8 | -32.0 | 2.0 | 10.9 | -0.7 | -6.5 | -1.0 | -4.8 | -1.8 |  | -11.0 |  | -6.4 | 3.4 |  | -3.9 | -0.4 |  | -4.2 |  | -10.4 | -2.9 |  |  |
| Fragment-ion (m/z)                                                                                                                                                                                                                                                                                                                                                                                                                                                                                                                                                                                                                                                                                                                                                                                                                                                                                                                                                                                                                                                                                                                                                                                                                                                                                                                                                                                                                                                                                                                                                                                                                                                                                                                                                                                                                                                                                                                                                                                                                                                                                                                                                                                                                                                                                                              | 72.081 | 86.098  | 101.068 | 175.119          | 330.153                               | 387.171                         | 500.252                    | 543.324                     | 571.289            | 614.361 | 643.251                | 713.423                | 741.346                                    | 828.452            | 834.404 | 854.417 | 899.491 | 947.485 | 967.507 | 1012.574 | 1038.539 | 1060.558 | 1125.659 | 1295.699 | 1366.734 |         |         |         |         |         |         |         |         |          |          |          |          |          |          |                        |      |      |      |      |      |      |      |       |      |      |      |      |      |      |      |      |      |      |      |      |      |      |      |      |      |                      |      |      |      |      |      |       |       |        |       |       |      |       |       |       |       |       |       |       |       |       |      |       |       |      |      |       |      |      |      |      |      |      |      |      |      |      |       |      |       |      |      |       |      |      |       |      |       |      |      |       |       |          |   |    |    |    |    |    |    |    |    |    |  |    |  |    |    |  |    |    |  |     |  |    |     |  |  |           |      |      |       |     |      |      |      |      |      |      |  |       |  |      |     |  |      |      |  |      |  |       |      |  |  |
| Frac. Inten.(% of TIC)                                                                                                                                                                                                                                                                                                                                                                                                                                                                                                                                                                                                                                                                                                                                                                                                                                                                                                                                                                                                                                                                                                                                                                                                                                                                                                                                                                                                                                                                                                                                                                                                                                                                                                                                                                                                                                                                                                                                                                                                                                                                                                                                                                                                                                                                                                          | 0.03   | 0.04    | 0.04    | 1.72             | 1.35                                  | 7.38                            | 4.89                       | 17.59                       | 7.64               | 6.10    | 1.34                   | 2.87                   | 6.78                                       | 4.63               | 2.62    | 5.17    | 7.72    | 3.10    | 3.79    | 6.31     | 1.25     | 2.34     | 2.85     | 1.11     | 1.35     |         |         |         |         |         |         |         |         |          |          |          |          |          |          |                        |      |      |      |      |      |      |      |       |      |      |      |      |      |      |      |      |      |      |      |      |      |      |      |      |      |                      |      |      |      |      |      |       |       |        |       |       |      |       |       |       |       |       |       |       |       |       |      |       |       |      |      |       |      |      |      |      |      |      |      |      |      |      |       |      |       |      |      |       |      |      |       |      |       |      |      |       |       |          |   |    |    |    |    |    |    |    |    |    |  |    |  |    |    |  |    |    |  |     |  |    |     |  |  |           |      |      |       |     |      |      |      |      |      |      |  |       |  |      |     |  |      |      |  |      |  |       |      |  |  |
| Rel. Inten.(% of BP)                                                                                                                                                                                                                                                                                                                                                                                                                                                                                                                                                                                                                                                                                                                                                                                                                                                                                                                                                                                                                                                                                                                                                                                                                                                                                                                                                                                                                                                                                                                                                                                                                                                                                                                                                                                                                                                                                                                                                                                                                                                                                                                                                                                                                                                                                                            | 0.17   | 0.25    | 0.22    | 9.80             | 7.66                                  | 41.94                           | 27.78                      | 100.00                      | 43.46              | 34.66   | 7.62                   | 16.31                  | 38.45                                      | 26.34              | 14.87   | 29.42   | 43.88   | 17.64   | 21.53   | 35.88    | 7.12     | 13.31    | 16.20    | 6.29     | 7.87     |         |         |         |         |         |         |         |         |          |          |          |          |          |          |                        |      |      |      |      |      |      |      |       |      |      |      |      |      |      |      |      |      |      |      |      |      |      |      |      |      |                      |      |      |      |      |      |       |       |        |       |       |      |       |       |       |       |       |       |       |       |       |      |       |       |      |      |       |      |      |      |      |      |      |      |      |      |      |       |      |       |      |      |       |      |      |       |      |       |      |      |       |       |          |   |    |    |    |    |    |    |    |    |    |  |    |  |    |    |  |    |    |  |     |  |    |     |  |  |           |      |      |       |     |      |      |      |      |      |      |  |       |  |      |     |  |      |      |  |      |  |       |      |  |  |
| Score                                                                                                                                                                                                                                                                                                                                                                                                                                                                                                                                                                                                                                                                                                                                                                                                                                                                                                                                                                                                                                                                                                                                                                                                                                                                                                                                                                                                                                                                                                                                                                                                                                                                                                                                                                                                                                                                                                                                                                                                                                                                                                                                                                                                                                                                                                                           | 0.60   | 0.22    | 0.50    | 1.50             | 0.50                                  | 0.50                            | 0.50                       | 1.50                        | 0.50               | 1.50    | -0.08                  | 1.50                   | -0.38                                      | 1.50               | 0.50    | -0.29   | 1.50    | 0.50    | -0.22   | 1.50     | -0.07    | 0.50     | 1.50     | -0.08    | -0.08    |         |         |         |         |         |         |         |         |          |          |          |          |          |          |                        |      |      |      |      |      |      |      |       |      |      |      |      |      |      |      |      |      |      |      |      |      |      |      |      |      |                      |      |      |      |      |      |       |       |        |       |       |      |       |       |       |       |       |       |       |       |       |      |       |       |      |      |       |      |      |      |      |      |      |      |      |      |      |       |      |       |      |      |       |      |      |       |      |       |      |      |       |       |          |   |    |    |    |    |    |    |    |    |    |  |    |  |    |    |  |    |    |  |     |  |    |     |  |  |           |      |      |       |     |      |      |      |      |      |      |  |       |  |      |     |  |      |      |  |      |  |       |      |  |  |
| Ion-type                                                                                                                                                                                                                                                                                                                                                                                                                                                                                                                                                                                                                                                                                                                                                                                                                                                                                                                                                                                                                                                                                                                                                                                                                                                                                                                                                                                                                                                                                                                                                                                                                                                                                                                                                                                                                                                                                                                                                                                                                                                                                                                                                                                                                                                                                                                        | V      | LI      | QK      | y1               | b2                                    | b3                              | b4                         | y5                          | b5                 | y6      |                        | y7                     |                                            | y8                 | b6      |         | y9      | b7      |         | y10      |          | b8       | y11      |          |          |         |         |         |         |         |         |         |         |          |          |          |          |          |          |                        |      |      |      |      |      |      |      |       |      |      |      |      |      |      |      |      |      |      |      |      |      |      |      |      |      |                      |      |      |      |      |      |       |       |        |       |       |      |       |       |       |       |       |       |       |       |       |      |       |       |      |      |       |      |      |      |      |      |      |      |      |      |      |       |      |       |      |      |       |      |      |       |      |       |      |      |       |       |          |   |    |    |    |    |    |    |    |    |    |  |    |  |    |    |  |    |    |  |     |  |    |     |  |  |           |      |      |       |     |      |      |      |      |      |      |  |       |  |      |     |  |      |      |  |      |  |       |      |  |  |
| Delta ppm                                                                                                                                                                                                                                                                                                                                                                                                                                                                                                                                                                                                                                                                                                                                                                                                                                                                                                                                                                                                                                                                                                                                                                                                                                                                                                                                                                                                                                                                                                                                                                                                                                                                                                                                                                                                                                                                                                                                                                                                                                                                                                                                                                                                                                                                                                                       | -3.8   | 14.8    | -32.0   | 2.0              | 10.9                                  | -0.7                            | -6.5                       | -1.0                        | -4.8               | -1.8    |                        | -11.0                  |                                            | -6.4               | 3.4     |         | -3.9    | -0.4    |         | -4.2     |          | -10.4    | -2.9     |          |          |         |         |         |         |         |         |         |         |          |          |          |          |          |          |                        |      |      |      |      |      |      |      |       |      |      |      |      |      |      |      |      |      |      |      |      |      |      |      |      |      |                      |      |      |      |      |      |       |       |        |       |       |      |       |       |       |       |       |       |       |       |       |      |       |       |      |      |       |      |      |      |      |      |      |      |      |      |      |       |      |       |      |      |       |      |      |       |      |       |      |      |       |       |          |   |    |    |    |    |    |    |    |    |    |  |    |  |    |    |  |    |    |  |     |  |    |     |  |  |           |      |      |       |     |      |      |      |      |      |      |  |       |  |      |     |  |      |      |  |      |  |       |      |  |  |

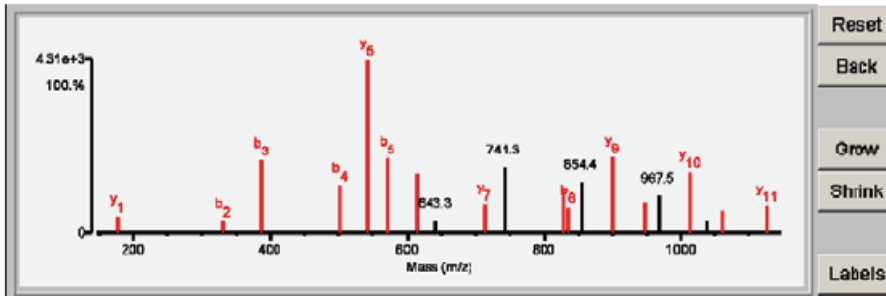

# N32

## Detailed Results

| Rank                                                                                                                                                                                                                                                                                                                                                                                                                                                                                                                                                                                                                                                                                                                                                                                                                                                                                                                                                                                                                                                                                                                                                                                                                                                                                                                                                                                                                                                                                                                                                                                                                                                                                                                                                                                                                                                                                                                                                                                                                                                                                                                                                                                                                                                                                                                                                                                                                          | Score  | SPI (%) | BCS    | # Unmatched Ions | Sequence                                      | MH <sup>+</sup> Calculated (Da) | MH <sup>+</sup> Error (Da) | MH <sup>+</sup> Error (ppm) | Protein MW/pl (Da) | Species | Accession #            | MS-Digest Index #     | Protein Name                                            |                       |         |                       |                       |                       |                       |         |                       |                       |         |                       |         |         |         |                       |         |                       |                       |                       |                       |         |                       |                       |         |                       |         |                        |      |      |      |      |      |      |      |      |       |      |      |      |      |      |      |      |      |      |      |      |      |      |      |      |      |                      |      |      |      |       |      |      |       |       |        |       |       |       |       |       |       |       |       |       |       |       |       |       |       |       |       |       |      |      |      |       |      |      |      |      |      |      |      |      |      |       |      |       |       |      |       |      |       |       |      |       |      |          |    |   |    |    |   |       |    |    |    |     |  |    |    |  |    |  |                       |  |  |    |  |    |  |    |           |     |      |      |  |     |      |     |      |      |      |      |       |      |  |      |  |  |      |  |       |  |       |  |     |
|-------------------------------------------------------------------------------------------------------------------------------------------------------------------------------------------------------------------------------------------------------------------------------------------------------------------------------------------------------------------------------------------------------------------------------------------------------------------------------------------------------------------------------------------------------------------------------------------------------------------------------------------------------------------------------------------------------------------------------------------------------------------------------------------------------------------------------------------------------------------------------------------------------------------------------------------------------------------------------------------------------------------------------------------------------------------------------------------------------------------------------------------------------------------------------------------------------------------------------------------------------------------------------------------------------------------------------------------------------------------------------------------------------------------------------------------------------------------------------------------------------------------------------------------------------------------------------------------------------------------------------------------------------------------------------------------------------------------------------------------------------------------------------------------------------------------------------------------------------------------------------------------------------------------------------------------------------------------------------------------------------------------------------------------------------------------------------------------------------------------------------------------------------------------------------------------------------------------------------------------------------------------------------------------------------------------------------------------------------------------------------------------------------------------------------|--------|---------|--------|------------------|-----------------------------------------------|---------------------------------|----------------------------|-----------------------------|--------------------|---------|------------------------|-----------------------|---------------------------------------------------------|-----------------------|---------|-----------------------|-----------------------|-----------------------|-----------------------|---------|-----------------------|-----------------------|---------|-----------------------|---------|---------|---------|-----------------------|---------|-----------------------|-----------------------|-----------------------|-----------------------|---------|-----------------------|-----------------------|---------|-----------------------|---------|------------------------|------|------|------|------|------|------|------|------|-------|------|------|------|------|------|------|------|------|------|------|------|------|------|------|------|------|----------------------|------|------|------|-------|------|------|-------|-------|--------|-------|-------|-------|-------|-------|-------|-------|-------|-------|-------|-------|-------|-------|-------|-------|-------|-------|------|------|------|-------|------|------|------|------|------|------|------|------|------|-------|------|-------|-------|------|-------|------|-------|-------|------|-------|------|----------|----|---|----|----|---|-------|----|----|----|-----|--|----|----|--|----|--|-----------------------|--|--|----|--|----|--|----|-----------|-----|------|------|--|-----|------|-----|------|------|------|------|-------|------|--|------|--|--|------|--|-------|--|-------|--|-----|
| 1                                                                                                                                                                                                                                                                                                                                                                                                                                                                                                                                                                                                                                                                                                                                                                                                                                                                                                                                                                                                                                                                                                                                                                                                                                                                                                                                                                                                                                                                                                                                                                                                                                                                                                                                                                                                                                                                                                                                                                                                                                                                                                                                                                                                                                                                                                                                                                                                                             | 12.19  | 69.9    | 7      | 8/25             | (P) YVQVYPA L T P E Q K K/E/L/S D/I/A H R (I) | 2745.2622                       | 0.0160                     | 5.8                         | 39420.2/8.30       | HUMAN   | <a href="#">P04075</a> | <a href="#">15959</a> | Fructose-bisphosphate aldolase A - Homo sapiens (Human) |                       |         |                       |                       |                       |                       |         |                       |                       |         |                       |         |         |         |                       |         |                       |                       |                       |                       |         |                       |                       |         |                       |         |                        |      |      |      |      |      |      |      |      |       |      |      |      |      |      |      |      |      |      |      |      |      |      |      |      |      |                      |      |      |      |       |      |      |       |       |        |       |       |       |       |       |       |       |       |       |       |       |       |       |       |       |       |       |      |      |      |       |      |      |      |      |      |      |      |      |      |       |      |       |       |      |       |      |       |       |      |       |      |          |    |   |    |    |   |       |    |    |    |     |  |    |    |  |    |  |                       |  |  |    |  |    |  |    |           |     |      |      |  |     |      |     |      |      |      |      |       |      |  |      |  |  |      |  |       |  |       |  |     |
| <table border="1"> <thead> <tr> <th>Fragment-ion (m/z)</th> <th>70.065</th><th>84.044</th><th>86.097</th><th>94.066</th><th>101.071</th><th>136.075</th><th>141.103</th><th>169.097</th><th>224.075</th><th>252.069</th><th>282.182</th><th>380.124</th><th>383.221</th><th>457.242<sup>+2</sup></th><th>496.297</th><th>611.335<sup>+2</sup></th><th>659.001<sup>+3</sup></th><th>672.993<sup>+3</sup></th><th>690.019<sup>+3</sup></th><th>696.345</th><th>775.924<sup>+2</sup></th><th>796.895<sup>+2</sup></th><th>811.432</th><th>817.881<sup>+2</sup></th><th>940.488</th> </tr> </thead> <tbody> <tr> <td>Frac. Inten.(% of TIC)</td> <td>0.01</td><td>0.15</td><td>0.23</td><td>3.00</td><td>0.27</td><td>0.28</td><td>3.50</td><td>7.97</td><td>13.49</td><td>7.92</td><td>2.86</td><td>9.90</td><td>5.69</td><td>4.20</td><td>3.33</td><td>3.08</td><td>3.31</td><td>4.10</td><td>3.37</td><td>4.01</td><td>4.09</td><td>4.83</td><td>3.23</td><td>4.18</td><td>3.00</td> </tr> <tr> <td>Rel. Inten.(% of BP)</td> <td>0.10</td><td>1.15</td><td>1.72</td><td>22.24</td><td>1.98</td><td>2.08</td><td>25.98</td><td>59.08</td><td>100.00</td><td>58.74</td><td>21.22</td><td>73.40</td><td>42.20</td><td>31.17</td><td>24.66</td><td>22.82</td><td>24.56</td><td>30.38</td><td>24.98</td><td>29.72</td><td>30.30</td><td>35.79</td><td>23.92</td><td>30.96</td><td>22.24</td> </tr> <tr> <td>Score</td> <td>0.20</td><td>1.00</td><td>0.22</td><td>-0.22</td><td>0.50</td><td>1.00</td><td>0.50</td><td>0.75</td><td>0.50</td><td>0.50</td><td>0.75</td><td>0.50</td><td>1.50</td><td>-0.31</td><td>1.50</td><td>-0.23</td><td>-0.25</td><td>0.50</td><td>-0.25</td><td>1.50</td><td>-0.30</td><td>-0.36</td><td>1.50</td><td>-0.31</td><td>1.50</td> </tr> <tr> <td>Ion-type</td> <td>PR</td><td>E</td><td>LI</td><td>QK</td><td>Y</td><td>PA-28</td><td>PA</td><td>a1</td><td>b1</td><td>PAL</td><td></td><td>b2</td><td>y3</td><td></td><td>y4</td><td></td><td>y15-H2O<sup>+3</sup></td><td></td><td></td><td>y6</td><td></td><td>y7</td><td></td><td>y8</td> </tr> <tr> <td>Delta ppm</td> <td>2.5</td><td>-8.2</td><td>10.2</td><td></td><td>1.8</td><td>-2.1</td><td>0.4</td><td>-9.2</td><td>-1.7</td><td>-3.9</td><td>-1.5</td><td>-12.3</td><td>17.0</td><td></td><td>-4.3</td><td></td><td></td><td>-6.8</td><td></td><td>-18.8</td><td></td><td>-12.5</td><td></td><td>3.6</td> </tr> </tbody> </table> |        |         |        |                  |                                               |                                 |                            |                             |                    |         |                        |                       |                                                         | Fragment-ion (m/z)    | 70.065  | 84.044                | 86.097                | 94.066                | 101.071               | 136.075 | 141.103               | 169.097               | 224.075 | 252.069               | 282.182 | 380.124 | 383.221 | 457.242 <sup>+2</sup> | 496.297 | 611.335 <sup>+2</sup> | 659.001 <sup>+3</sup> | 672.993 <sup>+3</sup> | 690.019 <sup>+3</sup> | 696.345 | 775.924 <sup>+2</sup> | 796.895 <sup>+2</sup> | 811.432 | 817.881 <sup>+2</sup> | 940.488 | Frac. Inten.(% of TIC) | 0.01 | 0.15 | 0.23 | 3.00 | 0.27 | 0.28 | 3.50 | 7.97 | 13.49 | 7.92 | 2.86 | 9.90 | 5.69 | 4.20 | 3.33 | 3.08 | 3.31 | 4.10 | 3.37 | 4.01 | 4.09 | 4.83 | 3.23 | 4.18 | 3.00 | Rel. Inten.(% of BP) | 0.10 | 1.15 | 1.72 | 22.24 | 1.98 | 2.08 | 25.98 | 59.08 | 100.00 | 58.74 | 21.22 | 73.40 | 42.20 | 31.17 | 24.66 | 22.82 | 24.56 | 30.38 | 24.98 | 29.72 | 30.30 | 35.79 | 23.92 | 30.96 | 22.24 | Score | 0.20 | 1.00 | 0.22 | -0.22 | 0.50 | 1.00 | 0.50 | 0.75 | 0.50 | 0.50 | 0.75 | 0.50 | 1.50 | -0.31 | 1.50 | -0.23 | -0.25 | 0.50 | -0.25 | 1.50 | -0.30 | -0.36 | 1.50 | -0.31 | 1.50 | Ion-type | PR | E | LI | QK | Y | PA-28 | PA | a1 | b1 | PAL |  | b2 | y3 |  | y4 |  | y15-H2O <sup>+3</sup> |  |  | y6 |  | y7 |  | y8 | Delta ppm | 2.5 | -8.2 | 10.2 |  | 1.8 | -2.1 | 0.4 | -9.2 | -1.7 | -3.9 | -1.5 | -12.3 | 17.0 |  | -4.3 |  |  | -6.8 |  | -18.8 |  | -12.5 |  | 3.6 |
| Fragment-ion (m/z)                                                                                                                                                                                                                                                                                                                                                                                                                                                                                                                                                                                                                                                                                                                                                                                                                                                                                                                                                                                                                                                                                                                                                                                                                                                                                                                                                                                                                                                                                                                                                                                                                                                                                                                                                                                                                                                                                                                                                                                                                                                                                                                                                                                                                                                                                                                                                                                                            | 70.065 | 84.044  | 86.097 | 94.066           | 101.071                                       | 136.075                         | 141.103                    | 169.097                     | 224.075            | 252.069 | 282.182                | 380.124               | 383.221                                                 | 457.242 <sup>+2</sup> | 496.297 | 611.335 <sup>+2</sup> | 659.001 <sup>+3</sup> | 672.993 <sup>+3</sup> | 690.019 <sup>+3</sup> | 696.345 | 775.924 <sup>+2</sup> | 796.895 <sup>+2</sup> | 811.432 | 817.881 <sup>+2</sup> | 940.488 |         |         |                       |         |                       |                       |                       |                       |         |                       |                       |         |                       |         |                        |      |      |      |      |      |      |      |      |       |      |      |      |      |      |      |      |      |      |      |      |      |      |      |      |      |                      |      |      |      |       |      |      |       |       |        |       |       |       |       |       |       |       |       |       |       |       |       |       |       |       |       |       |      |      |      |       |      |      |      |      |      |      |      |      |      |       |      |       |       |      |       |      |       |       |      |       |      |          |    |   |    |    |   |       |    |    |    |     |  |    |    |  |    |  |                       |  |  |    |  |    |  |    |           |     |      |      |  |     |      |     |      |      |      |      |       |      |  |      |  |  |      |  |       |  |       |  |     |
| Frac. Inten.(% of TIC)                                                                                                                                                                                                                                                                                                                                                                                                                                                                                                                                                                                                                                                                                                                                                                                                                                                                                                                                                                                                                                                                                                                                                                                                                                                                                                                                                                                                                                                                                                                                                                                                                                                                                                                                                                                                                                                                                                                                                                                                                                                                                                                                                                                                                                                                                                                                                                                                        | 0.01   | 0.15    | 0.23   | 3.00             | 0.27                                          | 0.28                            | 3.50                       | 7.97                        | 13.49              | 7.92    | 2.86                   | 9.90                  | 5.69                                                    | 4.20                  | 3.33    | 3.08                  | 3.31                  | 4.10                  | 3.37                  | 4.01    | 4.09                  | 4.83                  | 3.23    | 4.18                  | 3.00    |         |         |                       |         |                       |                       |                       |                       |         |                       |                       |         |                       |         |                        |      |      |      |      |      |      |      |      |       |      |      |      |      |      |      |      |      |      |      |      |      |      |      |      |      |                      |      |      |      |       |      |      |       |       |        |       |       |       |       |       |       |       |       |       |       |       |       |       |       |       |       |       |      |      |      |       |      |      |      |      |      |      |      |      |      |       |      |       |       |      |       |      |       |       |      |       |      |          |    |   |    |    |   |       |    |    |    |     |  |    |    |  |    |  |                       |  |  |    |  |    |  |    |           |     |      |      |  |     |      |     |      |      |      |      |       |      |  |      |  |  |      |  |       |  |       |  |     |
| Rel. Inten.(% of BP)                                                                                                                                                                                                                                                                                                                                                                                                                                                                                                                                                                                                                                                                                                                                                                                                                                                                                                                                                                                                                                                                                                                                                                                                                                                                                                                                                                                                                                                                                                                                                                                                                                                                                                                                                                                                                                                                                                                                                                                                                                                                                                                                                                                                                                                                                                                                                                                                          | 0.10   | 1.15    | 1.72   | 22.24            | 1.98                                          | 2.08                            | 25.98                      | 59.08                       | 100.00             | 58.74   | 21.22                  | 73.40                 | 42.20                                                   | 31.17                 | 24.66   | 22.82                 | 24.56                 | 30.38                 | 24.98                 | 29.72   | 30.30                 | 35.79                 | 23.92   | 30.96                 | 22.24   |         |         |                       |         |                       |                       |                       |                       |         |                       |                       |         |                       |         |                        |      |      |      |      |      |      |      |      |       |      |      |      |      |      |      |      |      |      |      |      |      |      |      |      |      |                      |      |      |      |       |      |      |       |       |        |       |       |       |       |       |       |       |       |       |       |       |       |       |       |       |       |       |      |      |      |       |      |      |      |      |      |      |      |      |      |       |      |       |       |      |       |      |       |       |      |       |      |          |    |   |    |    |   |       |    |    |    |     |  |    |    |  |    |  |                       |  |  |    |  |    |  |    |           |     |      |      |  |     |      |     |      |      |      |      |       |      |  |      |  |  |      |  |       |  |       |  |     |
| Score                                                                                                                                                                                                                                                                                                                                                                                                                                                                                                                                                                                                                                                                                                                                                                                                                                                                                                                                                                                                                                                                                                                                                                                                                                                                                                                                                                                                                                                                                                                                                                                                                                                                                                                                                                                                                                                                                                                                                                                                                                                                                                                                                                                                                                                                                                                                                                                                                         | 0.20   | 1.00    | 0.22   | -0.22            | 0.50                                          | 1.00                            | 0.50                       | 0.75                        | 0.50               | 0.50    | 0.75                   | 0.50                  | 1.50                                                    | -0.31                 | 1.50    | -0.23                 | -0.25                 | 0.50                  | -0.25                 | 1.50    | -0.30                 | -0.36                 | 1.50    | -0.31                 | 1.50    |         |         |                       |         |                       |                       |                       |                       |         |                       |                       |         |                       |         |                        |      |      |      |      |      |      |      |      |       |      |      |      |      |      |      |      |      |      |      |      |      |      |      |      |      |                      |      |      |      |       |      |      |       |       |        |       |       |       |       |       |       |       |       |       |       |       |       |       |       |       |       |       |      |      |      |       |      |      |      |      |      |      |      |      |      |       |      |       |       |      |       |      |       |       |      |       |      |          |    |   |    |    |   |       |    |    |    |     |  |    |    |  |    |  |                       |  |  |    |  |    |  |    |           |     |      |      |  |     |      |     |      |      |      |      |       |      |  |      |  |  |      |  |       |  |       |  |     |
| Ion-type                                                                                                                                                                                                                                                                                                                                                                                                                                                                                                                                                                                                                                                                                                                                                                                                                                                                                                                                                                                                                                                                                                                                                                                                                                                                                                                                                                                                                                                                                                                                                                                                                                                                                                                                                                                                                                                                                                                                                                                                                                                                                                                                                                                                                                                                                                                                                                                                                      | PR     | E       | LI     | QK               | Y                                             | PA-28                           | PA                         | a1                          | b1                 | PAL     |                        | b2                    | y3                                                      |                       | y4      |                       | y15-H2O <sup>+3</sup> |                       |                       | y6      |                       | y7                    |         | y8                    |         |         |         |                       |         |                       |                       |                       |                       |         |                       |                       |         |                       |         |                        |      |      |      |      |      |      |      |      |       |      |      |      |      |      |      |      |      |      |      |      |      |      |      |      |      |                      |      |      |      |       |      |      |       |       |        |       |       |       |       |       |       |       |       |       |       |       |       |       |       |       |       |       |      |      |      |       |      |      |      |      |      |      |      |      |      |       |      |       |       |      |       |      |       |       |      |       |      |          |    |   |    |    |   |       |    |    |    |     |  |    |    |  |    |  |                       |  |  |    |  |    |  |    |           |     |      |      |  |     |      |     |      |      |      |      |       |      |  |      |  |  |      |  |       |  |       |  |     |
| Delta ppm                                                                                                                                                                                                                                                                                                                                                                                                                                                                                                                                                                                                                                                                                                                                                                                                                                                                                                                                                                                                                                                                                                                                                                                                                                                                                                                                                                                                                                                                                                                                                                                                                                                                                                                                                                                                                                                                                                                                                                                                                                                                                                                                                                                                                                                                                                                                                                                                                     | 2.5    | -8.2    | 10.2   |                  | 1.8                                           | -2.1                            | 0.4                        | -9.2                        | -1.7               | -3.9    | -1.5                   | -12.3                 | 17.0                                                    |                       | -4.3    |                       |                       | -6.8                  |                       | -18.8   |                       | -12.5                 |         | 3.6                   |         |         |         |                       |         |                       |                       |                       |                       |         |                       |                       |         |                       |         |                        |      |      |      |      |      |      |      |      |       |      |      |      |      |      |      |      |      |      |      |      |      |      |      |      |      |                      |      |      |      |       |      |      |       |       |        |       |       |       |       |       |       |       |       |       |       |       |       |       |       |       |       |       |      |      |      |       |      |      |      |      |      |      |      |      |      |       |      |       |       |      |       |      |       |       |      |       |      |          |    |   |    |    |   |       |    |    |    |     |  |    |    |  |    |  |                       |  |  |    |  |    |  |    |           |     |      |      |  |     |      |     |      |      |      |      |       |      |  |      |  |  |      |  |       |  |       |  |     |

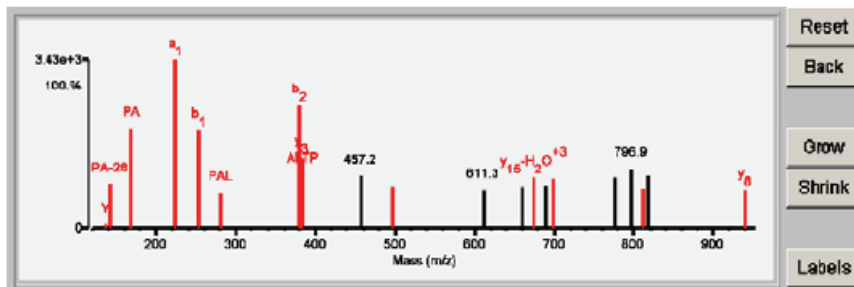



# N33

## Detailed Results

| Rank                   | Score  | SPI (%) | BCS    | # Unmatched Ions | Sequence                                       | MH <sup>+</sup> Calculated (Da) | MH <sup>+</sup> Error (Da) | MH <sup>+</sup> Error (ppm) | Protein MW pl (Da)                | Species | Accession #            | MS-Digest Index #     | Protein Name                                            |                       |         |         |         |                       |         |                       |         |         |         |          |          |
|------------------------|--------|---------|--------|------------------|------------------------------------------------|---------------------------------|----------------------------|-----------------------------|-----------------------------------|---------|------------------------|-----------------------|---------------------------------------------------------|-----------------------|---------|---------|---------|-----------------------|---------|-----------------------|---------|---------|---------|----------|----------|
| 1                      | 10.70  | 68.8    | 13     | 8/25             | (P)H\S\Y P A\L\S A E\Q\K K/E/L/S/D/I/A L/R (I) | 2614.2251                       | 0.0177                     | 6.8                         | 39456.1/6.41                      | HUMAN   | <a href="#">P09972</a> | <a href="#">15997</a> | Fructose-bisphosphate aldolase C - Homo sapiens (Human) |                       |         |         |         |                       |         |                       |         |         |         |          |          |
| Fragment-ion (m/z)     | 70.066 | 72.081  | 86.096 | 143.061          | 175.119                                        | 226.070                         | 313.105                    | 359.243                     | 449.200 <sup>+2</sup>             | 458.144 | 472.321                | 587.345               | 644.255                                                 | 671.781 <sup>+2</sup> | 674.375 | 757.330 | 787.449 | 796.057 <sup>+3</sup> | 803.349 | 826.065 <sup>+3</sup> | 894.392 | 916.509 | 976.477 | 1044.417 | 1172.548 |
| Frac. Inten.(% of TIC) | 0.00   | 4.30    | 0.35   | 4.17             | 4.72                                           | 4.66                            | 3.35                       | 3.93                        | 2.86                              | 8.39    | 4.13                   | 3.53                  | 4.63                                                    | 6.70                  | 7.34    | 4.95    | 3.72    | 3.28                  | 3.40    | 3.03                  | 3.03    | 6.20    | 3.33    | 3.19     | 2.82     |
| Rel. Inten.(% of BP)   | 0.05   | 51.28   | 4.13   | 48.78            | 56.31                                          | 55.56                           | 39.92                      | 46.83                       | 34.06                             | 100.00  | 49.27                  | 42.09                 | 55.18                                                   | 79.87                 | 87.56   | 58.97   | 44.37   | 39.11                 | 40.80   | 36.09                 | 36.15   | 73.96   | 39.74   | 37.98    | 33.63    |
| Score                  | 0.20   | -0.51   | 0.22   | -0.50            | 1.50                                           | 0.50                            | 0.50                       | 1.50                        | 0.25                              | 0.25    | 1.50                   | 1.50                  | 0.50                                                    | -0.80                 | 1.50    | 0.50    | 1.50    | -0.39                 | -0.41   | -0.36                 | -0.36   | 1.50    | -0.40   | 0.50     | 0.50     |
| Ion-type               | PR     |         | LI     |                  | y1                                             | b1                              | b2                         | y3                          | b3-H <sub>2</sub> O <sup>+2</sup> | y4      | y5                     | bs                    | y6                                                      | y6                    | b6      | y7      | y8      |                       |         |                       | y8      | b9      | b10     | b10      | b10      |
| Delta ppm              | 11.1   |         | -4.9   |                  | -2.6                                           | 20.0                            | 23.3                       | 9.1                         | -0.6                              | -14.5   | -6.1                   | -10.4                 | 6.4                                                     |                       | -12.0   | -5.9    | -22.5   |                       |         |                       | -0.7    |         | -28.6   | 36.7     |          |

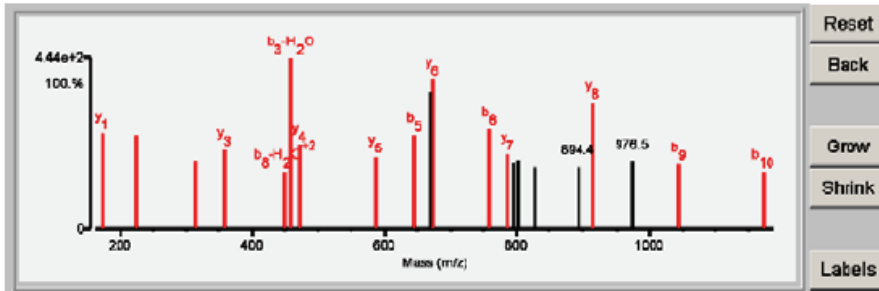

Reset  
Back  
Grow  
Shrink  
Labels

# N34

## Detailed Results

| Rank                   | Score  | SPI (%) | BCS    | # Unmatched Ions | Sequence                       | MH <sup>+</sup> Calculated (Da) | MH <sup>+</sup> Error (Da) | MH <sup>+</sup> Error (ppm) | Protein MW pl (Da) | Species | Accession #            | MS-Digest Index #      | Protein Name                                                                             |         |                  |                       |                       |         |                       |         |         |         |         |          |          |
|------------------------|--------|---------|--------|------------------|--------------------------------|---------------------------------|----------------------------|-----------------------------|--------------------|---------|------------------------|------------------------|------------------------------------------------------------------------------------------|---------|------------------|-----------------------|-----------------------|---------|-----------------------|---------|---------|---------|---------|----------|----------|
| 1                      | 19.14  | 81.3    | 10     | 6/25             | (C)G I E A Y/L/R/Y/E/V/E/R (T) | 1537.7620                       | -0.0023                    | -1.5                        | 78806.9/6.66       | HUMAN   | <a href="#">Q06210</a> | <a href="#">206239</a> | Glucosamine-fructose-6-phosphate aminotransferase [isomerizing] 1 - Homo sapiens (Human) |         |                  |                       |                       |         |                       |         |         |         |         |          |          |
| Fragment-ion (m/z)     | 70.065 | 72.081  | 86.097 | 94.065           | 101.071                        | 102.057                         | 120.081                    | 136.077                     | 175.118            | 259.111 | 272.172                | 371.236                | 406.180                                                                                  | 477.212 | 508.292          | 566.805 <sup>+2</sup> | 640.337 <sup>+2</sup> | 671.349 | 683.341 <sup>+2</sup> | 702.856 | 718.320 | 785.409 | 898.485 | 1061.536 | 1132.580 |
| Frac. Inten.(% of TIC) | 0.01   | 0.26    | 0.53   | 3.53             | 2.54                           | 2.67                            | 0.30                       | 0.16                        | 3.68               | 4.34    | 9.21                   | 4.08                   | 5.73                                                                                     | 10.45   | 2.92             | 3.08                  | 7.57                  | 3.27    | 3.18                  | 3.85    | 2.88    | 6.95    | 6.28    | 6.97     | 5.57     |
| Rel. Inten.(% of BP)   | 0.05   | 2.51    | 5.12   | 33.81            | 24.33                          | 25.57                           | 2.87                       | 1.54                        | 35.17              | 41.50   | 88.14                  | 38.85                  | 54.86                                                                                    | 100.00  | 27.92            | 29.52                 | 72.47                 | 31.25   | 30.42                 | 36.83   | 27.57   | 66.46   | 60.07   | 66.71    | 53.33    |
| Score                  | 0.20   | 0.50    | 0.22   | -0.34            | -0.24                          | -0.26                           | 1.00                       | 1.00                        | 1.50               | 0.50    | 1.50                   | 1.50                   | 0.50                                                                                     | 0.50    | 1.50             | 1.50                  | 1.50                  | 1.50    | -0.30                 | -0.37   | -0.28   | 1.50    | 1.50    | 1.50     | 1.50     |
| Ion-type               | PR     | V       | LI     |                  |                                | F                               | Y                          | y1                          | b2                 | y2      | y3                     | b3                     | b4                                                                                       | y4      | y9 <sup>+2</sup> | y10 <sup>+2</sup>     | y6                    |         |                       |         | y6      | y7      | y6      | y9       | y9       |
| Delta ppm              | -7.5   | 5.9     | 9.0    |                  |                                | -2.3                            | 8.2                        | -6.6                        | -5.0               | 1.4     | -10.9                  | -0.5                   | -11.1                                                                                    | -14.6   | 10.9             | 5.9                   | -20.5                 |         |                       |         | 4.7     | -4.6    | -15.6   | -8.3     |          |

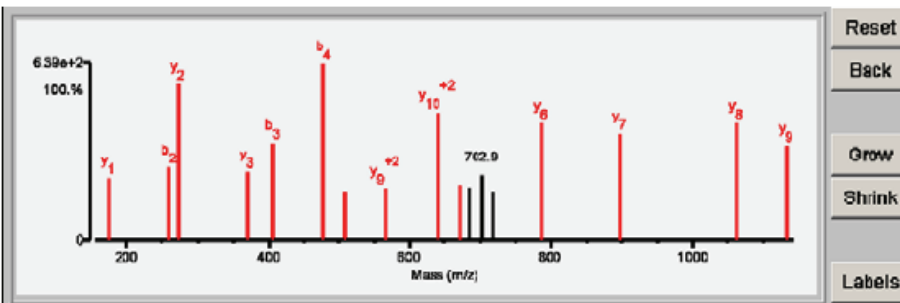

Reset  
Back  
Grow  
Shrink  
Labels



# N35

## Detailed Results

| Rank | Score | SPI (%) | BCS | # Unmatched Ions | Sequence                    | MH <sup>+</sup> Calculated (Da) | MH <sup>+</sup> Error (Da) | MH <sup>+</sup> Error (ppm) | Protein MW/pi (Da) | Species | Accession # | M8-Digest Index # | Protein Name                                       |
|------|-------|---------|-----|------------------|-----------------------------|---------------------------------|----------------------------|-----------------------------|--------------------|---------|-------------|-------------------|----------------------------------------------------|
| 1    | 11.84 | 68.7    | 8   | 8/24             | (-) F P V T V V T P V R (G) | 1426.7236                       | 0.0078                     | 6.3                         | 23368.016.43       | HUMAN   | P09211      | 227826            | Glutathione S-transferase P - Homo sapiens (Human) |

  

| Fragment-Ion (m/z)      | 70.088 | 72.080 | 86.097 | 87.100 | 102.067 | 110.070 | 120.080 | 138.075 | 168.084        | 169.072 | 188.082        | 285.113        | 371.236        | 448.181        | 618.307                          | 629.228 | 808.293+2                        | 828.276 | 841.339        | 881.357        | 748.402         | 760.446 | 878.478 | 1240.894 |
|-------------------------|--------|--------|--------|--------|---------|---------|---------|---------|----------------|---------|----------------|----------------|----------------|----------------|----------------------------------|---------|----------------------------------|---------|----------------|----------------|-----------------|---------|---------|----------|
| Frag. Inten. (% of TIC) | 0.01   | 0.20   | 17.05  | 3.28   | 2.95    | 4.16    | 0.20    | 0.15    | 7.81           | 2.57    | 9.16           | 7.51           | 2.93           | 2.92           | 2.71                             | 3.14    | 3.86                             | 3.90    | 3.30           | 4.48           | 3.10            | 7.14    | 3.14    | 4.32     |
| Rel. Inten. (% of BP)   | 0.04   | 1.19   | 100.00 | 19.23  | 17.33   | 24.41   | 1.15    | 0.89    | 45.82          | 15.09   | 53.75          | 44.07          | 17.20          | 17.15          | 15.91                            | 18.41   | 22.63                            | 22.85   | 19.35          | 26.29          | 18.16           | 41.89   | 18.42   | 25.34    |
| Score                   | 0.20   | 0.50   | -1.00  | -0.19  | -0.17   | -0.24   | 1.00    | 1.00    | 0.50           | -0.15   | 0.50           | 0.50           | 1.50           | 0.50           | 1.50                             | 0.25    | -0.23                            | 0.25    | -0.19          | 1.50           | -0.18           | 1.50    | 1.50    | 1.50     |
| Ion-type                | PR     | V      |        |        |         |         | F       | Y       | a <sub>1</sub> |         | b <sub>1</sub> | y <sub>3</sub> | b <sub>3</sub> | y <sub>4</sub> | b <sub>4</sub> -H <sub>2</sub> O |         | b <sub>5</sub> -H <sub>2</sub> O |         | y <sub>6</sub> | y <sub>7</sub> | y <sub>10</sub> |         |         |          |
| Delta ppm               | 5.3    | -6.6   |        |        |         |         | -3.1    | -7.3    | -0.7           |         | 12.2           | 3.9            | -14.4          | 12.3           | -2.8                             | 25.0    |                                  | -9.9    |                | -22.3          |                 | 5.9     | -34.8   | 17.4     |

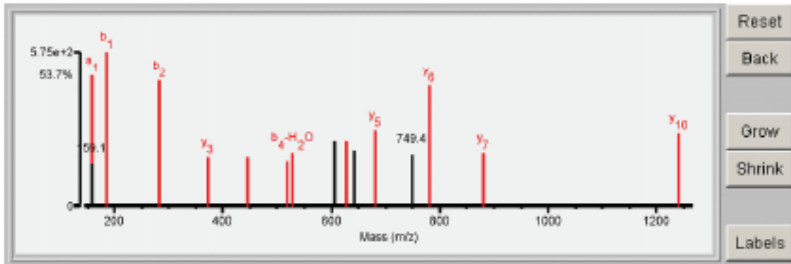

# N36

## Detailed Results

| Rank | Score | SPI (%) | BCS | # Unmatched Ions | Sequence                  | MH <sup>+</sup> Calculated (Da) | MH <sup>+</sup> Error (Da) | MH <sup>+</sup> Error (ppm) | Protein MW/pi (Da) | Species | Accession # | M8-Digest Index # | Protein Name                                       |
|------|-------|---------|-----|------------------|---------------------------|---------------------------------|----------------------------|-----------------------------|--------------------|---------|-------------|-------------------|----------------------------------------------------|
| 1    | 17.46 | 86.7    | 8   | 6/25             | (P) P Y T V V T P V R (G) | 1328.8708                       | 0.0040                     | 3.0                         | 28568.016.43       | HUMAN   | P09211      | 227826            | Glutathione S-transferase P - Homo sapiens (Human) |

  

| Fragment-Ion (m/z)      | 70.088 | 86.095 | 138.077 | 168.082        | 175.118        | 188.068        | 187.081 | 321.128        | 348.121        | 371.240        | 404.183 | 408.138 | 422.178        | 432.188                          | 450.187        | 518.305        | 531.228                          | 548.237        | 848.305 | 851.388        | 780.438        | 811.387        | 878.608        | 880.665        | 1143.812 |
|-------------------------|--------|--------|---------|----------------|----------------|----------------|---------|----------------|----------------|----------------|---------|---------|----------------|----------------------------------|----------------|----------------|----------------------------------|----------------|---------|----------------|----------------|----------------|----------------|----------------|----------|
| Frag. Inten. (% of TIC) | 0.00   | 1.00   | 0.02    | 2.63           | 1.16           | 7.62           | 0.68    | 1.29           | 3.38           | 3.88           | 0.71    | 0.77    | 0.70           | 14.43                            | 4.53           | 5.21           | 12.06                            | 3.47           | 1.16    | 7.65           | 17.30          | 0.74           | 5.35           | 3.27           | 0.98     |
| Rel. Inten. (% of BP)   | 0.01   | 5.78   | 0.12    | 15.22          | 6.69           | 44.05          | 3.95    | 7.48           | 19.56          | 22.40          | 4.10    | 4.44    | 4.05           | 83.38                            | 25.20          | 30.14          | 69.69                            | 20.05          | 6.70    | 44.20          | 100.00         | 4.25           | 30.94          | 18.93          | 5.64     |
| Score                   | 0.20   | -0.05  | 1.00    | 0.50           | 1.50           | 0.50           | -0.04   | 0.50           | 0.50           | 1.50           | -0.04   | -0.04   | 0.50           | 0.25                             | 0.50           | 1.50           | 0.25                             | 0.50           | -0.07   | 1.50           | 1.50           | 0.50           | 1.50           | 1.50           | 1.50     |
| Ion-type                | PR     | Y      |         | a <sub>1</sub> | y <sub>1</sub> | b <sub>1</sub> |         | a <sub>2</sub> | b <sub>2</sub> | y <sub>3</sub> |         |         | a <sub>3</sub> | b <sub>3</sub> -H <sub>2</sub> O | b <sub>3</sub> | y <sub>4</sub> | b <sub>4</sub> -H <sub>2</sub> O | b <sub>4</sub> |         | y <sub>5</sub> | y <sub>6</sub> | y <sub>7</sub> | y <sub>8</sub> | y <sub>9</sub> |          |
| Delta ppm               | 13.9   |        | 8.2     | -13.3          | -4.9           | -6.6           |         | -6.3           | -5.9           | 0.2            |         |         | 1.1            | -2.9                             | -7.4           | -7.0           | -0.9                             | -2.8           |         | -4.8           | -2.3           | -4.4           | -2.8           | -1.1           | -7.2     |

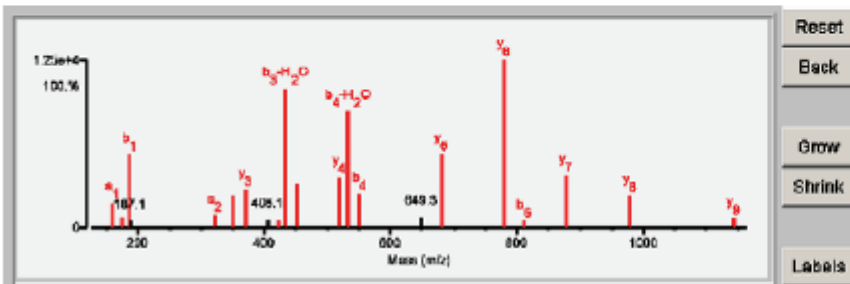

# N37

## Detailed Results

| Rank | Score | SPI (%) | BCS | # Unmatched Ions | Sequence                      | MH <sup>+</sup> Calculated (Da) | MH <sup>+</sup> Error (Da) | MH <sup>+</sup> Error (ppm) | Protein MW/pi (Da) | Species | Accession #            | MS-Digest Index #      | Protein Name                                                  |
|------|-------|---------|-----|------------------|-------------------------------|---------------------------------|----------------------------|-----------------------------|--------------------|---------|------------------------|------------------------|---------------------------------------------------------------|
| 1    | 20.94 | 96.7    | 10  | 3/25             | (-) P M P I V W Z N Y P R (A) | 1375.6861                       | 0.0234                     | 17.0                        | 12476.47.73        | HUMAN   | <a href="#">P14174</a> | <a href="#">335335</a> | Macrophage migration inhibitory factor - Homo sapiens (Human) |

  

| Fragment-ion (m/z)      | 70.066 | 86.096 | 94.066 | 120.082 | 158.065 | 175.119 | 186.060 | 261.164 | 272.173 | 289.107 | 317.101 | 371.239 | 436.179 | 464.174 | 485.291 | 577.257 | 586.338 | 676.340 <sup>+2</sup> | 700.383 | 782.424 | 799.456 | 912.535 | 917.446 | 1059.608 | 1190.620 |
|-------------------------|--------|--------|--------|---------|---------|---------|---------|---------|---------|---------|---------|---------|---------|---------|---------|---------|---------|-----------------------|---------|---------|---------|---------|---------|----------|----------|
| Frac. inten. (% of TIC) | 0.00   | 0.07   | 1.19   | 0.04    | 2.07    | 1.22    | 12.30   | 1.01    | 6.59    | 4.04    | 11.32   | 1.45    | 2.28    | 9.56    | 2.59    | 4.39    | 2.15    | 1.04                  | 7.51    | 2.17    | 14.05   | 6.68    | 1.02    | 3.71     | 1.56     |
| Rel. inten. (% of BP)   | 0.02   | 0.49   | 8.50   | 0.28    | 14.74   | 8.66    | 87.52   | 7.18    | 46.89   | 28.71   | 80.55   | 10.29   | 16.22   | 67.99   | 18.41   | 31.21   | 15.29   | 7.43                  | 53.44   | 15.46   | 100.00  | 47.49   | 7.27    | 26.37    | 11.10    |
| Score                   | 0.20   | 0.22   | -0.08  | 1.00    | 0.50    | 1.50    | 0.50    | 0.75    | 1.50    | 0.50    | 0.50    | 1.50    | 0.50    | 0.50    | 1.50    | 0.50    | 1.50    | -0.07                 | 1.50    | 1.50    | 1.50    | 1.50    | -0.07   | 1.50     | 1.50     |
| Ion-type                | PR     | LI     |        | F       | a1      | y1      | b1      | F1      | y2      | a2      | b2      | y3      | a3      | b3      | y4      | b4      | y5      |                       | y6      | y7-NH3  | y7      | y6      |         | y9       | y10      |
| Delta ppm               | 18.2   | -0.3   |        | 11.0    | 6.3     | 0.8     | 1.5     | 10.1    | 5.5     | 8.3     | 4.4     | -2.2    | 13.3    | 12.9    | 16.4    | 8.7     | 12.9    |                       | 13.3    | 10.4    | 16.8    | 9.7     |         | 12.3     | -13.1    |

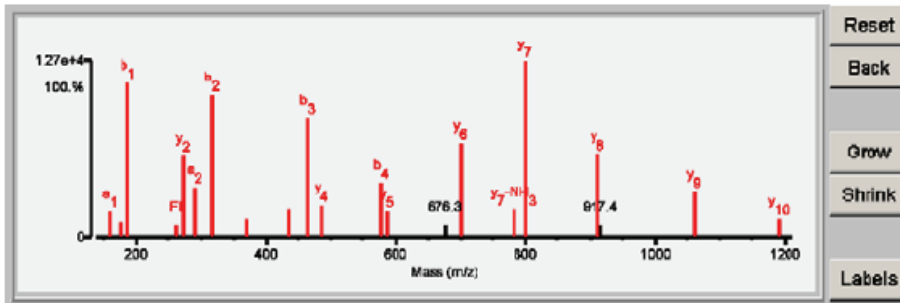

# N38

## Detailed Results

| Rank | Score | SPI (%) | BCS | # Unmatched Ions | Sequence                     | MH <sup>+</sup> Calculated (Da) | MH <sup>+</sup> Error (Da) | MH <sup>+</sup> Error (ppm) | Protein MW/pi (Da) | Species | Accession #            | MS-Digest Index #      | Protein Name                                                  |
|------|-------|---------|-----|------------------|------------------------------|---------------------------------|----------------------------|-----------------------------|--------------------|---------|------------------------|------------------------|---------------------------------------------------------------|
| 1    | 22.24 | 96.7    | 8   | 3/26             | (P)M F I V V W Y K V P R (A) | 1278.8833                       | 0.0060                     | 3.8                         | 12476.47.73        | HUMAN   | <a href="#">P14174</a> | <a href="#">335335</a> | Macrophage migration inhibitory factor - Homo sapiens (Human) |

  

| Fragment-ion (m/z)      | 86.087 | 120.082 | 121.086 | 144.048 | 233.186 | 261.180 | 272.172 | 278.178 | 367.116          | 371.240 | 400.228 <sup>+2</sup> | 462.202 | 468.788 <sup>+2</sup> | 480.188          | 485.280 | 630.300 <sup>+2</sup> | 676.267 | 688.353 | 682.368 | 700.374 | 782.419 | 786.442 | 912.624 | 1007.488 | 1068.688 |
|-------------------------|--------|---------|---------|---------|---------|---------|---------|---------|------------------|---------|-----------------------|---------|-----------------------|------------------|---------|-----------------------|---------|---------|---------|---------|---------|---------|---------|----------|----------|
| Frac. inten. (% of TIC) | 0.12   | 0.60    | 1.61    | 1.34    | 2.99    | 2.07    | 9.76    | 1.39    | 18.57            | 1.47    | 0.90                  | 1.21    | 0.96                  | 8.76             | 1.92    | 1.38                  | 2.40    | 2.98    | 2.14    | 12.59   | 2.05    | 17.07   | 3.19    | 1.54     | 0.99     |
| Rel. inten. (% of BP)   | 0.65   | 3.24    | 8.69    | 7.19    | 15.08   | 11.15   | 52.55   | 7.50    | 100.00           | 7.50    | 4.35                  | 6.52    | 5.17                  | 47.14            | 10.33   | 7.44                  | 12.94   | 16.03   | 11.53   | 67.78   | 11.02   | 91.93   | 17.20   | 8.28     | 5.34     |
| Score                   | 0.22   | 1.00    | -0.09   | -0.07   | 0.50    | 0.75    | 1.50    | -0.07   | 0.50             | 1.50    | 1.50                  | 0.50    | 1.50                  | 0.50             | 1.50    | 1.50                  | 0.50    | 0.50    | 0.50    | 1.50    | 1.50    | 1.50    | 1.50    | 0.50     | 1.50     |
| Ion-type                | LI     | F       |         | F1-28   | F1      | y2      | b2      | y5      | y7 <sup>+2</sup> | a5      | y8 <sup>+2</sup>      | b3      | y4                    | y9 <sup>+2</sup> | b4      | y6                    | y6-H2O  | y6      | y7-NH3  | y7      | y6      |         | b6      | y6       |          |
| Delta ppm               | 10.2   | 7.7     |         | -1.4    | -4.4    | 0.3     | -2.9    | -0.5    | 3.6              | -5.5    | 2.6                   | -2.5    | 2.6                   | -2.5             | 0.7     | -1.0                  | -1.3    | 3.3     | 7.5     | 0.6     | 4.7     | -0.1    | -2.2    | -3.6     | -8.4     |

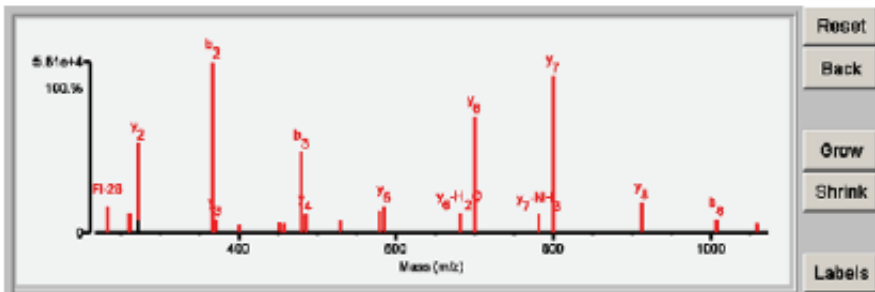

# N39

## Detailed Results

| Rank | Score | SPI (%) | BCS | # Unmatched Ions | Sequence                      | MH <sup>+</sup> Calculated (Da) | MH <sup>+</sup> Error (Da) | MH <sup>+</sup> Error (ppm) | Protein MWip1 (Da) | Species | Accession # | MS-Digest Index # | Protein Name                                                  |
|------|-------|---------|-----|------------------|-------------------------------|---------------------------------|----------------------------|-----------------------------|--------------------|---------|-------------|-------------------|---------------------------------------------------------------|
| 1    | 17.01 | 87.7    | 7   | 6/25             | (M) F I I V V N T H V P R (A) | 1147.6828                       | 0.0076                     | 6.5                         | 12478.4779         | HUMAN   | P14174      | 335335            | Macrophage migration inhibitory factor - Homo sapiens (Human) |

  

| Fragment-ion (m/z)      | 70.084 | 72.081 | 86.098 | 110.088 | 120.077 | 176.118 | 186.161 | 208.078 | 218.097 | 238.082 | 256.140 | 270.072 | 272.172 | 315.181 | 349.180 | 429.188 | 481.168 | 485.281 | 488.788 <sup>+2</sup> | 588.334 | 582.363 | 700.374 | 732.411 | 799.447 | 812.621 |     |      |
|-------------------------|--------|--------|--------|---------|---------|---------|---------|---------|---------|---------|---------|---------|---------|---------|---------|---------|---------|---------|-----------------------|---------|---------|---------|---------|---------|---------|-----|------|
| Frac. Inten. (% of TIC) | 0.00   | 0.20   | 1.41   | 2.25    | 0.16    | 2.51    | 4.56    | 3.41    | 2.49    | 1.52    | 3.69    | 1.84    | 7.15    | 1.80    | 8.40    | 2.10    | 1.82    | 2.53    | 1.80                  | 4.70    | 6.42    | 18.43   | 4.53    | 14.38   | 1.90    |     |      |
| Rel. Inten. (% of BP)   | 0.01   | 1.09   | 7.65   | 12.22   | 0.86    | 13.61   | 24.74   | 18.49   | 13.51   | 8.23    | 20.05   | 10.01   | 38.84   | 9.79    | 45.50   | 11.37   | 9.85    | 13.72   | 9.75                  | 25.49   | 34.81   | 100.00  | 24.57   | 78.07   | 10.28   |     |      |
| Score                   | 0.20   | 0.50   | 0.22   | -0.12   | 1.00    | 1.50    | -0.25   | 0.50    | 0.75    | 0.50    | 0.50    | -0.10   | 1.50    | 0.75    | 0.50    | 0.75    | -0.10   | 1.50    | -0.10                 | 1.50    | 0.50    | 1.50    | 0.50    | 1.50    | 1.50    |     |      |
| Ion-type                | PR     | V      | LI     |         | F       | Y1      |         | a1      | TN      | b1      | y2-NH3  |         | Y2      | TNV     | b2      | NTNV    |         | y4      |                       | y5      | y5-H2O  | y6      | y7-NH3  | y7      | y8      |     |      |
| Delta ppm               |        | -8.9   | 7.3    | -6.1    |         | -28.9   |         | -7.7    |         | -8.5    | -9.2    | 28.5    | -19.1   |         | 2.1     | -20.3   | 1.6     | -28.7   |                       | -5.3    |         | 5.7     | -14.2   | 0.3     | -5.9    | 6.0 | -5.4 |

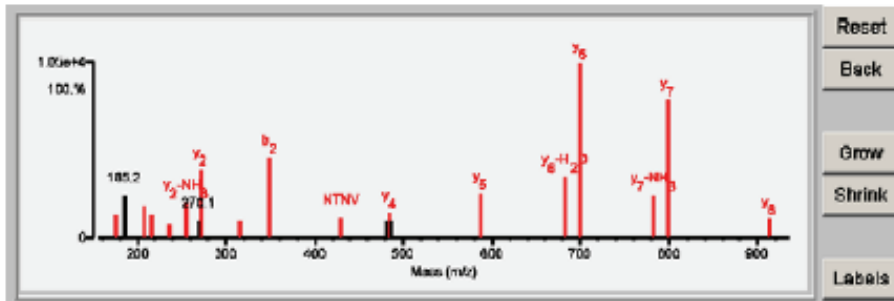

# N40

## Detailed Results

| Rank | Score | SPI (%) | BCS | # Unmatched Ions | Sequence                      | MH <sup>+</sup> Calculated (Da) | MH <sup>+</sup> Error (Da) | MH <sup>+</sup> Error (ppm) | Protein MWip1 (Da) | Species | Accession # | MS-Digest Index # | Protein Name                                                                       |
|------|-------|---------|-----|------------------|-------------------------------|---------------------------------|----------------------------|-----------------------------|--------------------|---------|-------------|-------------------|------------------------------------------------------------------------------------|
| 1    | 13.72 | 83.6    | 7   | 7/25             | (-) V I N I L I A Q I V R (D) | 1042.6078                       | 0.0012                     | 1.1                         | 6961.2903          | HUMAN   | O75438      | 368007            | NADH dehydrogenase [ubiquinone] 1 beta subcomplex subunit 1 - Homo sapiens (Human) |

  

| Fragment-ion (m/z)      | 72.081 | 84.083 | 86.097 | 87.054 | 158.088 | 160.078 | 175.119 | 185.167 | 188.072 | 200.140 | 214.153 | 242.145 | 274.188 | 302.118 | 370.171 | 387.207 <sup>+2</sup> | 387.274 | 415.196 | 498.305 | 528.288 | 628.416 | 741.508 | 751.465 | 838.477 | 855.537 |
|-------------------------|--------|--------|--------|--------|---------|---------|---------|---------|---------|---------|---------|---------|---------|---------|---------|-----------------------|---------|---------|---------|---------|---------|---------|---------|---------|---------|
| Frac. Inten. (% of TIC) | 0.23   | 1.38   | 0.33   | 0.19   | 1.95    | 15.03   | 4.72    | 1.87    | 8.94    | 6.32    | 2.13    | 5.28    | 1.58    | 8.21    | 1.51    | 2.30                  | 4.73    | 3.23    | 1.90    | 1.44    | 13.37   | 3.35    | 1.71    | 1.47    | 7.07    |
| Rel. Inten. (% of BP)   | 1.51   | 9.18   | 2.19   | 1.29   | 12.98   | 100.00  | 31.39   | 11.13   | 59.51   | 42.08   | 14.19   | 34.99   | 10.51   | 54.68   | 10.06   | 15.31                 | 31.45   | 21.50   | 12.82   | 9.55    | 88.99   | 22.29   | 11.37   | 9.75    | 47.06   |
| Score                   | 0.50   | -0.09  | 0.22   | 0.33   | 0.50    | 0.50    | 1.50    | -0.11   | 0.50    | -0.42   | 0.50    | 0.75    | 1.50    | 0.50    | -0.10   | -0.15                 | 1.50    | 0.50    | 0.50    | 0.50    | 1.50    | 1.50    | -0.11   | -0.10   | 1.50    |
| Ion-type                | V      |        | LI     | NR     | y1-NH3  | a1      | y1      |         | b1      | QI-28   | QI      | y2      | b2      |         |         | y3                    | b3      | y4-NH3  | b4      | y5      | y6      |         |         | y7      |         |
| Delta ppm               |        | 3.1    |        | 3.2    | -14.8   | -28.5   | -12.9   | 0.8     |         | -13.7   | -14.9   | -25.7   | 2.7     | 1.7     |         | 6.4                   | -13.9   | 3.7     | 2.8     | 3.5     | 13.0    |         |         | -5.3    |         |

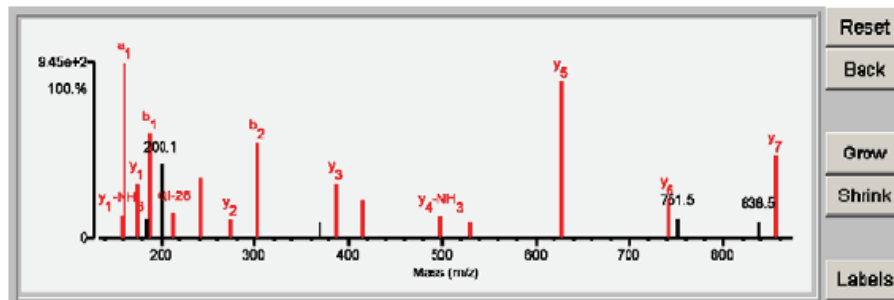

# N41

## Detailed Results

| Rank | Score | SPI (%) | BCS | # Unmatched Ions | Sequence              | MH <sup>+</sup> Calculated (Da) | MH <sup>+</sup> Error (Da) | MH <sup>+</sup> Error (ppm) | Protein MW/PI (Da) | Species | Accession #            | MS-Digest Index #      | Protein Name                                                                       |
|------|-------|---------|-----|------------------|-----------------------|---------------------------------|----------------------------|-----------------------------|--------------------|---------|------------------------|------------------------|------------------------------------------------------------------------------------|
| 1    | 11.40 | 71.5    | 6   | 11/25            | (V)N(L)L(Q)/I/V/R (D) | 943.5393                        | 0.0126                     | 13.3                        | 6961.2/9.03        | HUMAN   | <a href="#">O75438</a> | <a href="#">368007</a> | NADH dehydrogenase [ubiquinone] 1 beta subcomplex subunit 1 - Homo sapiens (Human) |

  

| Fragment-ion (m/z)      | 72.080 | 86.097 | 87.100 | 115.047 | 142.095 | 175.116 | 197.140 | 199.178 | 203.500 | 224.139 | 249.157 | 257.162 | 271.118 | 274.191 | 288.137 | 316.130 | 370.246 | 384.194 | 387.267 | 429.226 | 497.334 | 514.578 | 515.330 | 628.420 | 741.504 |
|-------------------------|--------|--------|--------|---------|---------|---------|---------|---------|---------|---------|---------|---------|---------|---------|---------|---------|---------|---------|---------|---------|---------|---------|---------|---------|---------|
| Frac. Inten. (% of TIC) | 0.05   | 0.80   | 2.62   | 3.02    | 1.69    | 5.47    | 1.73    | 3.78    | 7.01    | 1.93    | 2.60    | 2.59    | 3.87    | 4.32    | 3.37    | 6.82    | 2.94    | 1.83    | 3.66    | 1.90    | 3.64    | 1.82    | 21.65   | 6.83    | 4.06    |
| Rel. Inten. (% of BP)   | 0.23   | 3.71   | 12.09  | 13.95   | 7.83    | 25.26   | 7.98    | 17.48   | 32.36   | 8.89    | 12.02   | 11.98   | 17.89   | 19.95   | 15.58   | 31.50   | 13.58   | 8.45    | 16.91   | 8.77    | 16.82   | 8.39    | 100.00  | 31.56   | 18.71   |
| Score                   | 0.50   | 0.22   | -0.12  | -0.14   | -0.08   | 1.50    | -0.08   | -0.17   | 0.50    | -0.09   | -0.12   | 0.50    | -0.18   | 1.50    | 0.50    | 0.50    | 0.50    | -0.08   | 1.50    | 0.50    | -0.17   | -0.08   | 1.50    | 1.50    | 1.50    |
| Ion-type                | V      | LI     |        |         |         | y1      |         |         | b1      |         |         | y2-NH3  |         | y2      | a2      | b2      | y3-NH3  |         | y3      | b3      |         |         | y4      | y5      | y6      |
| Delta ppm               | -16.3  | 6.7    |        |         |         | -15.7   |         |         | 2.0     |         |         | 3.8     |         | 13.6    | -7.1    | -10.0   | 1.9     |         | -10.9   | 18.8    |         |         | 0.6     | 9.9     | 8.2     |

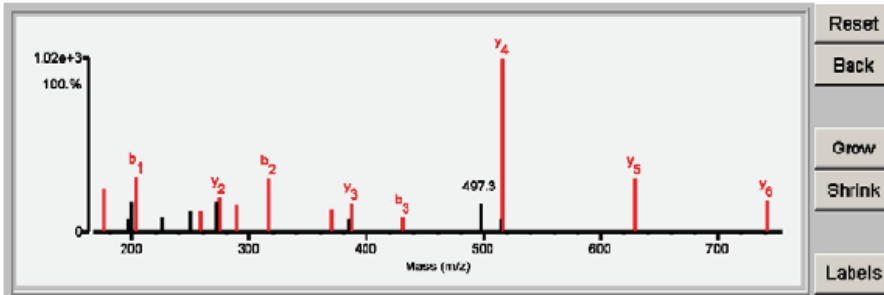

Reset  
Back  
Grow  
Shrink  
Labels

# N42

## Detailed Results

| Rank | Score | SPI (%) | BCS | # Unmatched Ions | Sequence                                   | MH <sup>+</sup> Calculated (Da) | MH <sup>+</sup> Error (Da) | MH <sup>+</sup> Error (ppm) | Protein MW/PI (Da) | Species | Accession #            | MS-Digest Index #      | Protein Name                                                 |
|------|-------|---------|-----|------------------|--------------------------------------------|---------------------------------|----------------------------|-----------------------------|--------------------|---------|------------------------|------------------------|--------------------------------------------------------------|
| 1    | 24.15 | 88.9    | 14  | 1/25             | (-)Y/K(R)T(V)F(F)D/I(A)Y/D/G/E/P L/G R (V) | 2084.0001                       | 0.0012                     | 0.8                         | 18012.9/7.88       | HUMAN   | <a href="#">P82837</a> | <a href="#">428886</a> | Peptidyl-prolyl cis-trans isomerase A - Homo sapiens (Human) |

  

| Fragment-ion (m/z)      | 88.096 | 282.158 | 280.184 | 302.118 | 442.275 | 482.205 | 500.218 | 671.315 | 681.273 | 688.284 | 828.338 | 743.384 | 748.361 | 842.430 | 857.831 <sup>+2</sup> | 888.848 <sup>+2</sup> | 883.430 | 913.489 | 923.868 <sup>+2</sup> | 1028.538 | 1121.531 | 1141.577 | 1182.588 | 1288.848 | 1436.710 |
|-------------------------|--------|---------|---------|---------|---------|---------|---------|---------|---------|---------|---------|---------|---------|---------|-----------------------|-----------------------|---------|---------|-----------------------|----------|----------|----------|----------|----------|----------|
| Frac. Inten. (% of TIC) | 0.03   | 1.82    | 1.05    | 1.04    | 10.97   | 7.62    | 1.86    | 1.35    | 14.52   | 5.44    | 3.87    | 5.18    | 3.55    | 4.12    | 0.93                  | 5.77                  | 1.79    | 4.90    | 1.73                  | 1.26     | 2.03     | 2.57     | 2.60     | 4.22     | 9.74     |
| Rel. Inten. (% of BP)   | 0.18   | 12.55   | 7.33    | 7.18    | 75.53   | 52.47   | 12.78   | 9.34    | 100.00  | 37.48   | 26.67   | 35.64   | 24.54   | 28.40   | 6.39                  | 39.75                 | 12.33   | 33.74   | 11.94                 | 8.71     | 13.99    | 17.72    | 17.91    | 29.05    | 67.09    |
| Score                   | 0.22   | 1.50    | -0.07   | 0.50    | 1.50    | 0.25    | 0.50    | 1.50    | 0.25    | 0.50    | 1.50    | 1.50    | 0.50    | 1.50    | 0.50                  | 1.50                  | 0.50    | 1.50    | 0.50                  | 1.50     | 0.50     | 1.50     | 0.50     | 1.50     | 1.50     |
| Ion-type                | LI     | y2      |         | b2      | y4      | b4-H2O  | b4      | a5      | b5-H2O  | b5      | y7      | b6      | y6      | b6      | y6-H2O <sup>+2</sup>  | y6 <sup>+2</sup>      | b7      | y9      | y17 <sup>+2</sup>     | y10      | b9       | y11      | b10      | y12      | a13      |
| Delta ppm               | -11.9  | -11.7   |         | 1.7     | -4.2    | -9.9    | -1.7    | 37.7    | -5.4    | -4.4    | -4.5    | -5.3    | -5.6    | -8.1    | -14.3                 | 0.3                   | 7.3     | -5.3    | -4.9                  | -18.6    | -3.4     | -6.6     | -4.4     | -5.8     | 11.1     |

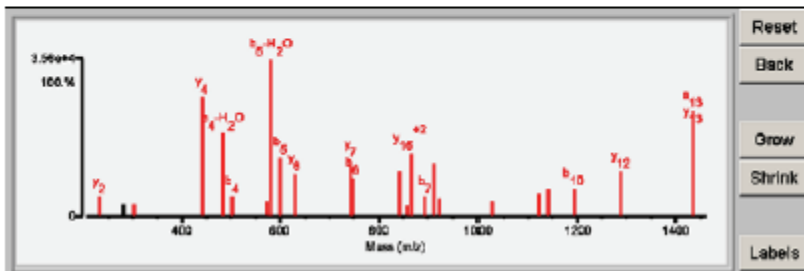

Reset  
Back  
Grow  
Shrink  
Labels

# N43

## Detailed Results

| Rank                                                                                                                                                                                                                                                                                                                                                                                                                                                                                                                                                                                                                                                                                                                                                                                                                                                                                                                                                                                                                                                                                                                                                                                                                                                                                                                                                                                                                                                                                                                                                                                                                                                                                                                                                                                                                                                                                                                                                                                                                                                                                                                                                                                                                                                                                                                                                                                                                                                                                                                                                                                                                                                                                                                                                                                                                                              | Score          | SP1 (%) | BCS                              | # Unmatched Ions | Sequence                                   | MH <sup>+</sup> Calculated (Da)  | MH <sup>+</sup> Error (Da) | MH <sup>+</sup> Error (ppm) | Protein MW(kDa) | Species        | Accession #    | MS-Digest Index # | Protein Name                                                 |                    |                |                               |                |                |                |                 |                |                 |                 |                 |                 |         |         |         |         |                       |         |         |          |          |          |          |          |          |          |                         |      |      |      |      |      |       |      |      |      |      |      |      |      |      |      |      |      |      |      |      |      |      |      |      |      |                       |       |       |       |       |       |        |       |       |       |       |       |       |       |       |       |       |       |       |       |       |       |       |       |       |       |       |      |       |      |      |      |      |      |      |      |      |      |      |      |      |      |      |      |      |      |      |      |      |      |      |      |          |                |  |                                  |                |                |                                  |                |                |       |                |                |        |                |                |                |                               |                |                |                |                 |                |                 |                 |                 |                 |           |       |  |      |      |      |      |       |       |     |      |      |      |      |       |      |      |     |     |      |      |      |      |      |      |      |
|---------------------------------------------------------------------------------------------------------------------------------------------------------------------------------------------------------------------------------------------------------------------------------------------------------------------------------------------------------------------------------------------------------------------------------------------------------------------------------------------------------------------------------------------------------------------------------------------------------------------------------------------------------------------------------------------------------------------------------------------------------------------------------------------------------------------------------------------------------------------------------------------------------------------------------------------------------------------------------------------------------------------------------------------------------------------------------------------------------------------------------------------------------------------------------------------------------------------------------------------------------------------------------------------------------------------------------------------------------------------------------------------------------------------------------------------------------------------------------------------------------------------------------------------------------------------------------------------------------------------------------------------------------------------------------------------------------------------------------------------------------------------------------------------------------------------------------------------------------------------------------------------------------------------------------------------------------------------------------------------------------------------------------------------------------------------------------------------------------------------------------------------------------------------------------------------------------------------------------------------------------------------------------------------------------------------------------------------------------------------------------------------------------------------------------------------------------------------------------------------------------------------------------------------------------------------------------------------------------------------------------------------------------------------------------------------------------------------------------------------------------------------------------------------------------------------------------------------------|----------------|---------|----------------------------------|------------------|--------------------------------------------|----------------------------------|----------------------------|-----------------------------|-----------------|----------------|----------------|-------------------|--------------------------------------------------------------|--------------------|----------------|-------------------------------|----------------|----------------|----------------|-----------------|----------------|-----------------|-----------------|-----------------|-----------------|---------|---------|---------|---------|-----------------------|---------|---------|----------|----------|----------|----------|----------|----------|----------|-------------------------|------|------|------|------|------|-------|------|------|------|------|------|------|------|------|------|------|------|------|------|------|------|------|------|------|------|-----------------------|-------|-------|-------|-------|-------|--------|-------|-------|-------|-------|-------|-------|-------|-------|-------|-------|-------|-------|-------|-------|-------|-------|-------|-------|-------|-------|------|-------|------|------|------|------|------|------|------|------|------|------|------|------|------|------|------|------|------|------|------|------|------|------|------|----------|----------------|--|----------------------------------|----------------|----------------|----------------------------------|----------------|----------------|-------|----------------|----------------|--------|----------------|----------------|----------------|-------------------------------|----------------|----------------|----------------|-----------------|----------------|-----------------|-----------------|-----------------|-----------------|-----------|-------|--|------|------|------|------|-------|-------|-----|------|------|------|------|-------|------|------|-----|-----|------|------|------|------|------|------|------|
| 1                                                                                                                                                                                                                                                                                                                                                                                                                                                                                                                                                                                                                                                                                                                                                                                                                                                                                                                                                                                                                                                                                                                                                                                                                                                                                                                                                                                                                                                                                                                                                                                                                                                                                                                                                                                                                                                                                                                                                                                                                                                                                                                                                                                                                                                                                                                                                                                                                                                                                                                                                                                                                                                                                                                                                                                                                                                 | 23.86          | 98.7    | 13                               | 1/25             | (V)K/P T(V)I(F)I(D)I(A)Y(D)G/E/P L/G R (V) | 1894.8917                        | 0.0002                     | 0.1                         | 18012.97.88     | HUMAN          | P82937         | 428898            | Peptidyl-prolyl cis-trans isomerase A - Homo sapiens (Human) |                    |                |                               |                |                |                |                 |                |                 |                 |                 |                 |         |         |         |         |                       |         |         |          |          |          |          |          |          |          |                         |      |      |      |      |      |       |      |      |      |      |      |      |      |      |      |      |      |      |      |      |      |      |      |      |      |                       |       |       |       |       |       |        |       |       |       |       |       |       |       |       |       |       |       |       |       |       |       |       |       |       |       |       |      |       |      |      |      |      |      |      |      |      |      |      |      |      |      |      |      |      |      |      |      |      |      |      |      |          |                |  |                                  |                |                |                                  |                |                |       |                |                |        |                |                |                |                               |                |                |                |                 |                |                 |                 |                 |                 |           |       |  |      |      |      |      |       |       |     |      |      |      |      |       |      |      |     |     |      |      |      |      |      |      |      |
| <table border="1"> <thead> <tr> <th>Fragment-Ion (m/z)</th> <th>232.137</th> <th>280.169</th> <th>383.137</th> <th>401.148</th> <th>442.274</th> <th>482.206</th> <th>600.213</th> <th>671.312</th> <th>682.316</th> <th>828.336</th> <th>847.286</th> <th>707.338</th> <th>743.364</th> <th>784.334</th> <th>842.432</th> <th>889.848<sup>+2</sup></th> <th>906.388</th> <th>913.475</th> <th>1022.487</th> <th>1026.668</th> <th>1088.600</th> <th>1141.674</th> <th>1182.671</th> <th>1288.845</th> <th>1436.717</th> </tr> </thead> <tbody> <tr> <td>Frag. Inten. (% of TIC)</td> <td>2.38</td> <td>1.33</td> <td>6.58</td> <td>1.65</td> <td>9.94</td> <td>12.39</td> <td>5.37</td> <td>1.76</td> <td>1.25</td> <td>4.68</td> <td>4.77</td> <td>1.80</td> <td>5.29</td> <td>2.01</td> <td>4.62</td> <td>5.85</td> <td>1.56</td> <td>4.09</td> <td>3.26</td> <td>1.46</td> <td>2.41</td> <td>3.63</td> <td>1.81</td> <td>3.74</td> <td>6.37</td> </tr> <tr> <td>Rel. Inten. (% of BP)</td> <td>19.18</td> <td>10.77</td> <td>53.09</td> <td>13.35</td> <td>80.25</td> <td>100.00</td> <td>43.35</td> <td>14.17</td> <td>10.05</td> <td>37.79</td> <td>38.51</td> <td>14.55</td> <td>42.69</td> <td>16.22</td> <td>37.33</td> <td>47.19</td> <td>12.57</td> <td>33.04</td> <td>26.29</td> <td>11.81</td> <td>19.42</td> <td>29.30</td> <td>14.62</td> <td>30.15</td> <td>51.39</td> </tr> <tr> <td>Score</td> <td>1.50</td> <td>-0.11</td> <td>0.25</td> <td>0.50</td> <td>1.50</td> <td>0.25</td> <td>0.50</td> <td>1.50</td> <td>0.75</td> <td>1.50</td> <td>0.50</td> <td>0.75</td> <td>1.50</td> <td>0.50</td> <td>1.50</td> <td>1.50</td> <td>0.50</td> <td>1.50</td> <td>0.50</td> <td>1.50</td> <td>0.50</td> <td>1.50</td> <td>0.50</td> <td>1.50</td> <td>1.50</td> </tr> <tr> <td>Ion-type</td> <td>Y<sub>2</sub></td> <td></td> <td>b<sub>3</sub>+H<sub>2</sub>O</td> <td>b<sub>3</sub></td> <td>y<sub>4</sub></td> <td>b<sub>4</sub>+H<sub>2</sub>O</td> <td>b<sub>4</sub></td> <td>y<sub>5</sub></td> <td>PTVFF</td> <td>y<sub>6</sub></td> <td>b<sub>5</sub></td> <td>PTVFFD</td> <td>y<sub>7</sub></td> <td>b<sub>6</sub></td> <td>y<sub>8</sub></td> <td>a<sub>16</sub><sup>+2</sup></td> <td>b<sub>7</sub></td> <td>y<sub>9</sub></td> <td>b<sub>8</sub></td> <td>y<sub>10</sub></td> <td>b<sub>9</sub></td> <td>y<sub>11</sub></td> <td>b<sub>10</sub></td> <td>y<sub>12</sub></td> <td>y<sub>13</sub></td> </tr> <tr> <td>Delta ppm</td> <td>-15.0</td> <td></td> <td>-6.4</td> <td>-3.3</td> <td>-7.3</td> <td>-5.3</td> <td>-11.1</td> <td>-13.5</td> <td>1.6</td> <td>-8.0</td> <td>-2.6</td> <td>-4.7</td> <td>-5.6</td> <td>-27.3</td> <td>-5.2</td> <td>36.4</td> <td>6.3</td> <td>1.7</td> <td>20.5</td> <td>-0.2</td> <td>-3.3</td> <td>-9.6</td> <td>-0.5</td> <td>-6.1</td> <td>-3.3</td> </tr> </tbody> </table> |                |         |                                  |                  |                                            |                                  |                            |                             |                 |                |                |                   |                                                              | Fragment-Ion (m/z) | 232.137        | 280.169                       | 383.137        | 401.148        | 442.274        | 482.206         | 600.213        | 671.312         | 682.316         | 828.336         | 847.286         | 707.338 | 743.364 | 784.334 | 842.432 | 889.848 <sup>+2</sup> | 906.388 | 913.475 | 1022.487 | 1026.668 | 1088.600 | 1141.674 | 1182.671 | 1288.845 | 1436.717 | Frag. Inten. (% of TIC) | 2.38 | 1.33 | 6.58 | 1.65 | 9.94 | 12.39 | 5.37 | 1.76 | 1.25 | 4.68 | 4.77 | 1.80 | 5.29 | 2.01 | 4.62 | 5.85 | 1.56 | 4.09 | 3.26 | 1.46 | 2.41 | 3.63 | 1.81 | 3.74 | 6.37 | Rel. Inten. (% of BP) | 19.18 | 10.77 | 53.09 | 13.35 | 80.25 | 100.00 | 43.35 | 14.17 | 10.05 | 37.79 | 38.51 | 14.55 | 42.69 | 16.22 | 37.33 | 47.19 | 12.57 | 33.04 | 26.29 | 11.81 | 19.42 | 29.30 | 14.62 | 30.15 | 51.39 | Score | 1.50 | -0.11 | 0.25 | 0.50 | 1.50 | 0.25 | 0.50 | 1.50 | 0.75 | 1.50 | 0.50 | 0.75 | 1.50 | 0.50 | 1.50 | 1.50 | 0.50 | 1.50 | 0.50 | 1.50 | 0.50 | 1.50 | 0.50 | 1.50 | 1.50 | Ion-type | Y <sub>2</sub> |  | b <sub>3</sub> +H <sub>2</sub> O | b <sub>3</sub> | y <sub>4</sub> | b <sub>4</sub> +H <sub>2</sub> O | b <sub>4</sub> | y <sub>5</sub> | PTVFF | y <sub>6</sub> | b <sub>5</sub> | PTVFFD | y <sub>7</sub> | b <sub>6</sub> | y <sub>8</sub> | a <sub>16</sub> <sup>+2</sup> | b <sub>7</sub> | y <sub>9</sub> | b <sub>8</sub> | y <sub>10</sub> | b <sub>9</sub> | y <sub>11</sub> | b <sub>10</sub> | y <sub>12</sub> | y <sub>13</sub> | Delta ppm | -15.0 |  | -6.4 | -3.3 | -7.3 | -5.3 | -11.1 | -13.5 | 1.6 | -8.0 | -2.6 | -4.7 | -5.6 | -27.3 | -5.2 | 36.4 | 6.3 | 1.7 | 20.5 | -0.2 | -3.3 | -9.6 | -0.5 | -6.1 | -3.3 |
| Fragment-Ion (m/z)                                                                                                                                                                                                                                                                                                                                                                                                                                                                                                                                                                                                                                                                                                                                                                                                                                                                                                                                                                                                                                                                                                                                                                                                                                                                                                                                                                                                                                                                                                                                                                                                                                                                                                                                                                                                                                                                                                                                                                                                                                                                                                                                                                                                                                                                                                                                                                                                                                                                                                                                                                                                                                                                                                                                                                                                                                | 232.137        | 280.169 | 383.137                          | 401.148          | 442.274                                    | 482.206                          | 600.213                    | 671.312                     | 682.316         | 828.336        | 847.286        | 707.338           | 743.364                                                      | 784.334            | 842.432        | 889.848 <sup>+2</sup>         | 906.388        | 913.475        | 1022.487       | 1026.668        | 1088.600       | 1141.674        | 1182.671        | 1288.845        | 1436.717        |         |         |         |         |                       |         |         |          |          |          |          |          |          |          |                         |      |      |      |      |      |       |      |      |      |      |      |      |      |      |      |      |      |      |      |      |      |      |      |      |      |                       |       |       |       |       |       |        |       |       |       |       |       |       |       |       |       |       |       |       |       |       |       |       |       |       |       |       |      |       |      |      |      |      |      |      |      |      |      |      |      |      |      |      |      |      |      |      |      |      |      |      |      |          |                |  |                                  |                |                |                                  |                |                |       |                |                |        |                |                |                |                               |                |                |                |                 |                |                 |                 |                 |                 |           |       |  |      |      |      |      |       |       |     |      |      |      |      |       |      |      |     |     |      |      |      |      |      |      |      |
| Frag. Inten. (% of TIC)                                                                                                                                                                                                                                                                                                                                                                                                                                                                                                                                                                                                                                                                                                                                                                                                                                                                                                                                                                                                                                                                                                                                                                                                                                                                                                                                                                                                                                                                                                                                                                                                                                                                                                                                                                                                                                                                                                                                                                                                                                                                                                                                                                                                                                                                                                                                                                                                                                                                                                                                                                                                                                                                                                                                                                                                                           | 2.38           | 1.33    | 6.58                             | 1.65             | 9.94                                       | 12.39                            | 5.37                       | 1.76                        | 1.25            | 4.68           | 4.77           | 1.80              | 5.29                                                         | 2.01               | 4.62           | 5.85                          | 1.56           | 4.09           | 3.26           | 1.46            | 2.41           | 3.63            | 1.81            | 3.74            | 6.37            |         |         |         |         |                       |         |         |          |          |          |          |          |          |          |                         |      |      |      |      |      |       |      |      |      |      |      |      |      |      |      |      |      |      |      |      |      |      |      |      |      |                       |       |       |       |       |       |        |       |       |       |       |       |       |       |       |       |       |       |       |       |       |       |       |       |       |       |       |      |       |      |      |      |      |      |      |      |      |      |      |      |      |      |      |      |      |      |      |      |      |      |      |      |          |                |  |                                  |                |                |                                  |                |                |       |                |                |        |                |                |                |                               |                |                |                |                 |                |                 |                 |                 |                 |           |       |  |      |      |      |      |       |       |     |      |      |      |      |       |      |      |     |     |      |      |      |      |      |      |      |
| Rel. Inten. (% of BP)                                                                                                                                                                                                                                                                                                                                                                                                                                                                                                                                                                                                                                                                                                                                                                                                                                                                                                                                                                                                                                                                                                                                                                                                                                                                                                                                                                                                                                                                                                                                                                                                                                                                                                                                                                                                                                                                                                                                                                                                                                                                                                                                                                                                                                                                                                                                                                                                                                                                                                                                                                                                                                                                                                                                                                                                                             | 19.18          | 10.77   | 53.09                            | 13.35            | 80.25                                      | 100.00                           | 43.35                      | 14.17                       | 10.05           | 37.79          | 38.51          | 14.55             | 42.69                                                        | 16.22              | 37.33          | 47.19                         | 12.57          | 33.04          | 26.29          | 11.81           | 19.42          | 29.30           | 14.62           | 30.15           | 51.39           |         |         |         |         |                       |         |         |          |          |          |          |          |          |          |                         |      |      |      |      |      |       |      |      |      |      |      |      |      |      |      |      |      |      |      |      |      |      |      |      |      |                       |       |       |       |       |       |        |       |       |       |       |       |       |       |       |       |       |       |       |       |       |       |       |       |       |       |       |      |       |      |      |      |      |      |      |      |      |      |      |      |      |      |      |      |      |      |      |      |      |      |      |      |          |                |  |                                  |                |                |                                  |                |                |       |                |                |        |                |                |                |                               |                |                |                |                 |                |                 |                 |                 |                 |           |       |  |      |      |      |      |       |       |     |      |      |      |      |       |      |      |     |     |      |      |      |      |      |      |      |
| Score                                                                                                                                                                                                                                                                                                                                                                                                                                                                                                                                                                                                                                                                                                                                                                                                                                                                                                                                                                                                                                                                                                                                                                                                                                                                                                                                                                                                                                                                                                                                                                                                                                                                                                                                                                                                                                                                                                                                                                                                                                                                                                                                                                                                                                                                                                                                                                                                                                                                                                                                                                                                                                                                                                                                                                                                                                             | 1.50           | -0.11   | 0.25                             | 0.50             | 1.50                                       | 0.25                             | 0.50                       | 1.50                        | 0.75            | 1.50           | 0.50           | 0.75              | 1.50                                                         | 0.50               | 1.50           | 1.50                          | 0.50           | 1.50           | 0.50           | 1.50            | 0.50           | 1.50            | 0.50            | 1.50            | 1.50            |         |         |         |         |                       |         |         |          |          |          |          |          |          |          |                         |      |      |      |      |      |       |      |      |      |      |      |      |      |      |      |      |      |      |      |      |      |      |      |      |      |                       |       |       |       |       |       |        |       |       |       |       |       |       |       |       |       |       |       |       |       |       |       |       |       |       |       |       |      |       |      |      |      |      |      |      |      |      |      |      |      |      |      |      |      |      |      |      |      |      |      |      |      |          |                |  |                                  |                |                |                                  |                |                |       |                |                |        |                |                |                |                               |                |                |                |                 |                |                 |                 |                 |                 |           |       |  |      |      |      |      |       |       |     |      |      |      |      |       |      |      |     |     |      |      |      |      |      |      |      |
| Ion-type                                                                                                                                                                                                                                                                                                                                                                                                                                                                                                                                                                                                                                                                                                                                                                                                                                                                                                                                                                                                                                                                                                                                                                                                                                                                                                                                                                                                                                                                                                                                                                                                                                                                                                                                                                                                                                                                                                                                                                                                                                                                                                                                                                                                                                                                                                                                                                                                                                                                                                                                                                                                                                                                                                                                                                                                                                          | Y <sub>2</sub> |         | b <sub>3</sub> +H <sub>2</sub> O | b <sub>3</sub>   | y <sub>4</sub>                             | b <sub>4</sub> +H <sub>2</sub> O | b <sub>4</sub>             | y <sub>5</sub>              | PTVFF           | y <sub>6</sub> | b <sub>5</sub> | PTVFFD            | y <sub>7</sub>                                               | b <sub>6</sub>     | y <sub>8</sub> | a <sub>16</sub> <sup>+2</sup> | b <sub>7</sub> | y <sub>9</sub> | b <sub>8</sub> | y <sub>10</sub> | b <sub>9</sub> | y <sub>11</sub> | b <sub>10</sub> | y <sub>12</sub> | y <sub>13</sub> |         |         |         |         |                       |         |         |          |          |          |          |          |          |          |                         |      |      |      |      |      |       |      |      |      |      |      |      |      |      |      |      |      |      |      |      |      |      |      |      |      |                       |       |       |       |       |       |        |       |       |       |       |       |       |       |       |       |       |       |       |       |       |       |       |       |       |       |       |      |       |      |      |      |      |      |      |      |      |      |      |      |      |      |      |      |      |      |      |      |      |      |      |      |          |                |  |                                  |                |                |                                  |                |                |       |                |                |        |                |                |                |                               |                |                |                |                 |                |                 |                 |                 |                 |           |       |  |      |      |      |      |       |       |     |      |      |      |      |       |      |      |     |     |      |      |      |      |      |      |      |
| Delta ppm                                                                                                                                                                                                                                                                                                                                                                                                                                                                                                                                                                                                                                                                                                                                                                                                                                                                                                                                                                                                                                                                                                                                                                                                                                                                                                                                                                                                                                                                                                                                                                                                                                                                                                                                                                                                                                                                                                                                                                                                                                                                                                                                                                                                                                                                                                                                                                                                                                                                                                                                                                                                                                                                                                                                                                                                                                         | -15.0          |         | -6.4                             | -3.3             | -7.3                                       | -5.3                             | -11.1                      | -13.5                       | 1.6             | -8.0           | -2.6           | -4.7              | -5.6                                                         | -27.3              | -5.2           | 36.4                          | 6.3            | 1.7            | 20.5           | -0.2            | -3.3           | -9.6            | -0.5            | -6.1            | -3.3            |         |         |         |         |                       |         |         |          |          |          |          |          |          |          |                         |      |      |      |      |      |       |      |      |      |      |      |      |      |      |      |      |      |      |      |      |      |      |      |      |      |                       |       |       |       |       |       |        |       |       |       |       |       |       |       |       |       |       |       |       |       |       |       |       |       |       |       |       |      |       |      |      |      |      |      |      |      |      |      |      |      |      |      |      |      |      |      |      |      |      |      |      |      |          |                |  |                                  |                |                |                                  |                |                |       |                |                |        |                |                |                |                               |                |                |                |                 |                |                 |                 |                 |                 |           |       |  |      |      |      |      |       |       |     |      |      |      |      |       |      |      |     |     |      |      |      |      |      |      |      |

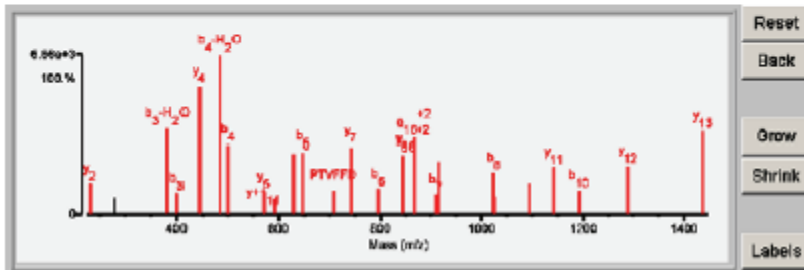

# N44

## Detailed Results

| Rank                                                                                                                                                                                                                                                                                                                                                                                                                                                                                                                                                                                                                                                                                                                                                                                                                                                                                                                                                                                                                                                                                                                                                                                                                                                                                                                                                                                                                                                                                                                                                                                                                                                                                                                                                                                                                                                                                                                                                                                                                                                                                                                                                                                                                                                                                                                                                                                                                                                                                                                                                                                                                                                                                                                                                                                                                         | Score  | SP1 (%) | BCS     | # Unmatched Ions | Sequence                                 | MH <sup>+</sup> Calculated (Da) | MH <sup>+</sup> Error (Da) | MH <sup>+</sup> Error (ppm)      | Protein MW(kDa) | Species        | Accession #    | MS-Digest Index # | Protein Name                                                 |                    |                |                                  |                |                |                |                |                 |                |                 |                 |                 |         |         |         |         |         |         |         |         |         |          |          |          |          |          |                         |      |      |      |      |      |      |      |      |      |       |      |      |      |      |      |      |      |      |      |      |      |      |      |      |      |                       |      |      |      |       |       |       |      |       |       |        |       |       |       |       |       |      |       |       |       |       |       |       |       |       |       |       |      |      |      |      |      |      |       |      |      |      |      |      |      |      |      |      |      |      |      |      |      |      |      |      |      |          |   |    |   |                |                                  |                |  |                                  |                |                |                |                |                |                |                |                                  |                |                |                |                |                 |                |                 |                 |                 |           |       |       |       |       |       |       |  |       |       |       |       |       |      |       |       |       |       |       |       |      |       |       |       |       |       |
|------------------------------------------------------------------------------------------------------------------------------------------------------------------------------------------------------------------------------------------------------------------------------------------------------------------------------------------------------------------------------------------------------------------------------------------------------------------------------------------------------------------------------------------------------------------------------------------------------------------------------------------------------------------------------------------------------------------------------------------------------------------------------------------------------------------------------------------------------------------------------------------------------------------------------------------------------------------------------------------------------------------------------------------------------------------------------------------------------------------------------------------------------------------------------------------------------------------------------------------------------------------------------------------------------------------------------------------------------------------------------------------------------------------------------------------------------------------------------------------------------------------------------------------------------------------------------------------------------------------------------------------------------------------------------------------------------------------------------------------------------------------------------------------------------------------------------------------------------------------------------------------------------------------------------------------------------------------------------------------------------------------------------------------------------------------------------------------------------------------------------------------------------------------------------------------------------------------------------------------------------------------------------------------------------------------------------------------------------------------------------------------------------------------------------------------------------------------------------------------------------------------------------------------------------------------------------------------------------------------------------------------------------------------------------------------------------------------------------------------------------------------------------------------------------------------------------|--------|---------|---------|------------------|------------------------------------------|---------------------------------|----------------------------|----------------------------------|-----------------|----------------|----------------|-------------------|--------------------------------------------------------------|--------------------|----------------|----------------------------------|----------------|----------------|----------------|----------------|-----------------|----------------|-----------------|-----------------|-----------------|---------|---------|---------|---------|---------|---------|---------|---------|---------|----------|----------|----------|----------|----------|-------------------------|------|------|------|------|------|------|------|------|------|-------|------|------|------|------|------|------|------|------|------|------|------|------|------|------|------|-----------------------|------|------|------|-------|-------|-------|------|-------|-------|--------|-------|-------|-------|-------|-------|------|-------|-------|-------|-------|-------|-------|-------|-------|-------|-------|------|------|------|------|------|------|-------|------|------|------|------|------|------|------|------|------|------|------|------|------|------|------|------|------|------|----------|---|----|---|----------------|----------------------------------|----------------|--|----------------------------------|----------------|----------------|----------------|----------------|----------------|----------------|----------------|----------------------------------|----------------|----------------|----------------|----------------|-----------------|----------------|-----------------|-----------------|-----------------|-----------|-------|-------|-------|-------|-------|-------|--|-------|-------|-------|-------|-------|------|-------|-------|-------|-------|-------|-------|------|-------|-------|-------|-------|-------|
| 1                                                                                                                                                                                                                                                                                                                                                                                                                                                                                                                                                                                                                                                                                                                                                                                                                                                                                                                                                                                                                                                                                                                                                                                                                                                                                                                                                                                                                                                                                                                                                                                                                                                                                                                                                                                                                                                                                                                                                                                                                                                                                                                                                                                                                                                                                                                                                                                                                                                                                                                                                                                                                                                                                                                                                                                                                            | 22.41  | 98.3    | 12      | 1/25             | (N)P T(V)I(F)I(D)I(A)Y(D)G/E/P L/G R (V) | 1820.8867                       | -0.0204                    | -11.2                            | 18012.97.88     | HUMAN          | P82937         | 428898            | Peptidyl-prolyl cis-trans isomerase A - Homo sapiens (Human) |                    |                |                                  |                |                |                |                |                 |                |                 |                 |                 |         |         |         |         |         |         |         |         |         |          |          |          |          |          |                         |      |      |      |      |      |      |      |      |      |       |      |      |      |      |      |      |      |      |      |      |      |      |      |      |      |                       |      |      |      |       |       |       |      |       |       |        |       |       |       |       |       |      |       |       |       |       |       |       |       |       |       |       |      |      |      |      |      |      |       |      |      |      |      |      |      |      |      |      |      |      |      |      |      |      |      |      |      |          |   |    |   |                |                                  |                |  |                                  |                |                |                |                |                |                |                |                                  |                |                |                |                |                 |                |                 |                 |                 |           |       |       |       |       |       |       |  |       |       |       |       |       |      |       |       |       |       |       |       |      |       |       |       |       |       |
| <table border="1"> <thead> <tr> <th>Fragment-Ion (m/z)</th> <th>72.078</th> <th>88.096</th> <th>120.078</th> <th>232.137</th> <th>269.088</th> <th>287.103</th> <th>340.168</th> <th>368.180</th> <th>388.171</th> <th>442.271</th> <th>533.238</th> <th>671.307</th> <th>828.336</th> <th>880.297</th> <th>743.364</th> <th>777.318</th> <th>796.330</th> <th>842.427</th> <th>913.484</th> <th>979.453</th> <th>1026.636</th> <th>1078.613</th> <th>1141.598</th> <th>1288.832</th> <th>1436.888</th> </tr> </thead> <tbody> <tr> <td>Frag. Inten. (% of TIC)</td> <td>0.02</td> <td>0.09</td> <td>0.03</td> <td>2.15</td> <td>2.20</td> <td>1.97</td> <td>0.74</td> <td>8.19</td> <td>8.18</td> <td>11.56</td> <td>8.92</td> <td>1.28</td> <td>5.21</td> <td>3.68</td> <td>7.68</td> <td>0.82</td> <td>4.15</td> <td>5.39</td> <td>7.36</td> <td>6.44</td> <td>2.11</td> <td>2.70</td> <td>2.17</td> <td>3.48</td> <td>3.57</td> </tr> <tr> <td>Rel. Inten. (% of BP)</td> <td>0.20</td> <td>0.81</td> <td>0.23</td> <td>18.59</td> <td>19.03</td> <td>16.15</td> <td>6.44</td> <td>70.88</td> <td>70.80</td> <td>100.00</td> <td>77.22</td> <td>11.10</td> <td>45.08</td> <td>31.89</td> <td>66.47</td> <td>7.11</td> <td>35.95</td> <td>46.68</td> <td>63.70</td> <td>55.72</td> <td>18.22</td> <td>23.33</td> <td>18.76</td> <td>30.08</td> <td>30.92</td> </tr> <tr> <td>Score</td> <td>0.50</td> <td>0.22</td> <td>1.00</td> <td>1.50</td> <td>0.25</td> <td>0.50</td> <td>-0.06</td> <td>0.25</td> <td>0.50</td> <td>1.50</td> <td>0.50</td> <td>1.50</td> <td>1.50</td> <td>0.50</td> <td>1.50</td> <td>0.25</td> <td>0.50</td> <td>1.50</td> <td>1.50</td> <td>0.50</td> <td>1.50</td> <td>0.50</td> <td>1.50</td> <td>1.50</td> <td>1.50</td> </tr> <tr> <td>Ion-type</td> <td>V</td> <td>LI</td> <td>F</td> <td>Y<sub>2</sub></td> <td>b<sub>2</sub>+H<sub>2</sub>O</td> <td>b<sub>2</sub></td> <td></td> <td>b<sub>3</sub>+H<sub>2</sub>O</td> <td>b<sub>3</sub></td> <td>y<sub>4</sub></td> <td>b<sub>4</sub></td> <td>y<sub>5</sub></td> <td>y<sub>6</sub></td> <td>b<sub>5</sub></td> <td>y<sub>7</sub></td> <td>b<sub>6</sub>+H<sub>2</sub>O</td> <td>b<sub>6</sub></td> <td>y<sub>8</sub></td> <td>y<sub>9</sub></td> <td>b<sub>8</sub></td> <td>y<sub>10</sub></td> <td>b<sub>9</sub></td> <td>y<sub>11</sub></td> <td>y<sub>12</sub></td> <td>y<sub>13</sub></td> </tr> <tr> <td>Delta ppm</td> <td>-21.9</td> <td>-13.1</td> <td>-25.4</td> <td>-16.0</td> <td>-31.0</td> <td>-14.6</td> <td></td> <td>-12.6</td> <td>-11.7</td> <td>-14.8</td> <td>-14.1</td> <td>-22.8</td> <td>-8.9</td> <td>-22.3</td> <td>-19.4</td> <td>-13.1</td> <td>-11.4</td> <td>-11.0</td> <td>-10.7</td> <td>-7.7</td> <td>-22.3</td> <td>-14.6</td> <td>-16.6</td> <td>-16.4</td> <td>-23.2</td> </tr> </tbody> </table> |        |         |         |                  |                                          |                                 |                            |                                  |                 |                |                |                   |                                                              | Fragment-Ion (m/z) | 72.078         | 88.096                           | 120.078        | 232.137        | 269.088        | 287.103        | 340.168         | 368.180        | 388.171         | 442.271         | 533.238         | 671.307 | 828.336 | 880.297 | 743.364 | 777.318 | 796.330 | 842.427 | 913.484 | 979.453 | 1026.636 | 1078.613 | 1141.598 | 1288.832 | 1436.888 | Frag. Inten. (% of TIC) | 0.02 | 0.09 | 0.03 | 2.15 | 2.20 | 1.97 | 0.74 | 8.19 | 8.18 | 11.56 | 8.92 | 1.28 | 5.21 | 3.68 | 7.68 | 0.82 | 4.15 | 5.39 | 7.36 | 6.44 | 2.11 | 2.70 | 2.17 | 3.48 | 3.57 | Rel. Inten. (% of BP) | 0.20 | 0.81 | 0.23 | 18.59 | 19.03 | 16.15 | 6.44 | 70.88 | 70.80 | 100.00 | 77.22 | 11.10 | 45.08 | 31.89 | 66.47 | 7.11 | 35.95 | 46.68 | 63.70 | 55.72 | 18.22 | 23.33 | 18.76 | 30.08 | 30.92 | Score | 0.50 | 0.22 | 1.00 | 1.50 | 0.25 | 0.50 | -0.06 | 0.25 | 0.50 | 1.50 | 0.50 | 1.50 | 1.50 | 0.50 | 1.50 | 0.25 | 0.50 | 1.50 | 1.50 | 0.50 | 1.50 | 0.50 | 1.50 | 1.50 | 1.50 | Ion-type | V | LI | F | Y <sub>2</sub> | b <sub>2</sub> +H <sub>2</sub> O | b <sub>2</sub> |  | b <sub>3</sub> +H <sub>2</sub> O | b <sub>3</sub> | y <sub>4</sub> | b <sub>4</sub> | y <sub>5</sub> | y <sub>6</sub> | b <sub>5</sub> | y <sub>7</sub> | b <sub>6</sub> +H <sub>2</sub> O | b <sub>6</sub> | y <sub>8</sub> | y <sub>9</sub> | b <sub>8</sub> | y <sub>10</sub> | b <sub>9</sub> | y <sub>11</sub> | y <sub>12</sub> | y <sub>13</sub> | Delta ppm | -21.9 | -13.1 | -25.4 | -16.0 | -31.0 | -14.6 |  | -12.6 | -11.7 | -14.8 | -14.1 | -22.8 | -8.9 | -22.3 | -19.4 | -13.1 | -11.4 | -11.0 | -10.7 | -7.7 | -22.3 | -14.6 | -16.6 | -16.4 | -23.2 |
| Fragment-Ion (m/z)                                                                                                                                                                                                                                                                                                                                                                                                                                                                                                                                                                                                                                                                                                                                                                                                                                                                                                                                                                                                                                                                                                                                                                                                                                                                                                                                                                                                                                                                                                                                                                                                                                                                                                                                                                                                                                                                                                                                                                                                                                                                                                                                                                                                                                                                                                                                                                                                                                                                                                                                                                                                                                                                                                                                                                                                           | 72.078 | 88.096  | 120.078 | 232.137          | 269.088                                  | 287.103                         | 340.168                    | 368.180                          | 388.171         | 442.271        | 533.238        | 671.307           | 828.336                                                      | 880.297            | 743.364        | 777.318                          | 796.330        | 842.427        | 913.484        | 979.453        | 1026.636        | 1078.613       | 1141.598        | 1288.832        | 1436.888        |         |         |         |         |         |         |         |         |         |          |          |          |          |          |                         |      |      |      |      |      |      |      |      |      |       |      |      |      |      |      |      |      |      |      |      |      |      |      |      |      |                       |      |      |      |       |       |       |      |       |       |        |       |       |       |       |       |      |       |       |       |       |       |       |       |       |       |       |      |      |      |      |      |      |       |      |      |      |      |      |      |      |      |      |      |      |      |      |      |      |      |      |      |          |   |    |   |                |                                  |                |  |                                  |                |                |                |                |                |                |                |                                  |                |                |                |                |                 |                |                 |                 |                 |           |       |       |       |       |       |       |  |       |       |       |       |       |      |       |       |       |       |       |       |      |       |       |       |       |       |
| Frag. Inten. (% of TIC)                                                                                                                                                                                                                                                                                                                                                                                                                                                                                                                                                                                                                                                                                                                                                                                                                                                                                                                                                                                                                                                                                                                                                                                                                                                                                                                                                                                                                                                                                                                                                                                                                                                                                                                                                                                                                                                                                                                                                                                                                                                                                                                                                                                                                                                                                                                                                                                                                                                                                                                                                                                                                                                                                                                                                                                                      | 0.02   | 0.09    | 0.03    | 2.15             | 2.20                                     | 1.97                            | 0.74                       | 8.19                             | 8.18            | 11.56          | 8.92           | 1.28              | 5.21                                                         | 3.68               | 7.68           | 0.82                             | 4.15           | 5.39           | 7.36           | 6.44           | 2.11            | 2.70           | 2.17            | 3.48            | 3.57            |         |         |         |         |         |         |         |         |         |          |          |          |          |          |                         |      |      |      |      |      |      |      |      |      |       |      |      |      |      |      |      |      |      |      |      |      |      |      |      |      |                       |      |      |      |       |       |       |      |       |       |        |       |       |       |       |       |      |       |       |       |       |       |       |       |       |       |       |      |      |      |      |      |      |       |      |      |      |      |      |      |      |      |      |      |      |      |      |      |      |      |      |      |          |   |    |   |                |                                  |                |  |                                  |                |                |                |                |                |                |                |                                  |                |                |                |                |                 |                |                 |                 |                 |           |       |       |       |       |       |       |  |       |       |       |       |       |      |       |       |       |       |       |       |      |       |       |       |       |       |
| Rel. Inten. (% of BP)                                                                                                                                                                                                                                                                                                                                                                                                                                                                                                                                                                                                                                                                                                                                                                                                                                                                                                                                                                                                                                                                                                                                                                                                                                                                                                                                                                                                                                                                                                                                                                                                                                                                                                                                                                                                                                                                                                                                                                                                                                                                                                                                                                                                                                                                                                                                                                                                                                                                                                                                                                                                                                                                                                                                                                                                        | 0.20   | 0.81    | 0.23    | 18.59            | 19.03                                    | 16.15                           | 6.44                       | 70.88                            | 70.80           | 100.00         | 77.22          | 11.10             | 45.08                                                        | 31.89              | 66.47          | 7.11                             | 35.95          | 46.68          | 63.70          | 55.72          | 18.22           | 23.33          | 18.76           | 30.08           | 30.92           |         |         |         |         |         |         |         |         |         |          |          |          |          |          |                         |      |      |      |      |      |      |      |      |      |       |      |      |      |      |      |      |      |      |      |      |      |      |      |      |      |                       |      |      |      |       |       |       |      |       |       |        |       |       |       |       |       |      |       |       |       |       |       |       |       |       |       |       |      |      |      |      |      |      |       |      |      |      |      |      |      |      |      |      |      |      |      |      |      |      |      |      |      |          |   |    |   |                |                                  |                |  |                                  |                |                |                |                |                |                |                |                                  |                |                |                |                |                 |                |                 |                 |                 |           |       |       |       |       |       |       |  |       |       |       |       |       |      |       |       |       |       |       |       |      |       |       |       |       |       |
| Score                                                                                                                                                                                                                                                                                                                                                                                                                                                                                                                                                                                                                                                                                                                                                                                                                                                                                                                                                                                                                                                                                                                                                                                                                                                                                                                                                                                                                                                                                                                                                                                                                                                                                                                                                                                                                                                                                                                                                                                                                                                                                                                                                                                                                                                                                                                                                                                                                                                                                                                                                                                                                                                                                                                                                                                                                        | 0.50   | 0.22    | 1.00    | 1.50             | 0.25                                     | 0.50                            | -0.06                      | 0.25                             | 0.50            | 1.50           | 0.50           | 1.50              | 1.50                                                         | 0.50               | 1.50           | 0.25                             | 0.50           | 1.50           | 1.50           | 0.50           | 1.50            | 0.50           | 1.50            | 1.50            | 1.50            |         |         |         |         |         |         |         |         |         |          |          |          |          |          |                         |      |      |      |      |      |      |      |      |      |       |      |      |      |      |      |      |      |      |      |      |      |      |      |      |      |                       |      |      |      |       |       |       |      |       |       |        |       |       |       |       |       |      |       |       |       |       |       |       |       |       |       |       |      |      |      |      |      |      |       |      |      |      |      |      |      |      |      |      |      |      |      |      |      |      |      |      |      |          |   |    |   |                |                                  |                |  |                                  |                |                |                |                |                |                |                |                                  |                |                |                |                |                 |                |                 |                 |                 |           |       |       |       |       |       |       |  |       |       |       |       |       |      |       |       |       |       |       |       |      |       |       |       |       |       |
| Ion-type                                                                                                                                                                                                                                                                                                                                                                                                                                                                                                                                                                                                                                                                                                                                                                                                                                                                                                                                                                                                                                                                                                                                                                                                                                                                                                                                                                                                                                                                                                                                                                                                                                                                                                                                                                                                                                                                                                                                                                                                                                                                                                                                                                                                                                                                                                                                                                                                                                                                                                                                                                                                                                                                                                                                                                                                                     | V      | LI      | F       | Y <sub>2</sub>   | b <sub>2</sub> +H <sub>2</sub> O         | b <sub>2</sub>                  |                            | b <sub>3</sub> +H <sub>2</sub> O | b <sub>3</sub>  | y <sub>4</sub> | b <sub>4</sub> | y <sub>5</sub>    | y <sub>6</sub>                                               | b <sub>5</sub>     | y <sub>7</sub> | b <sub>6</sub> +H <sub>2</sub> O | b <sub>6</sub> | y <sub>8</sub> | y <sub>9</sub> | b <sub>8</sub> | y <sub>10</sub> | b <sub>9</sub> | y <sub>11</sub> | y <sub>12</sub> | y <sub>13</sub> |         |         |         |         |         |         |         |         |         |          |          |          |          |          |                         |      |      |      |      |      |      |      |      |      |       |      |      |      |      |      |      |      |      |      |      |      |      |      |      |      |                       |      |      |      |       |       |       |      |       |       |        |       |       |       |       |       |      |       |       |       |       |       |       |       |       |       |       |      |      |      |      |      |      |       |      |      |      |      |      |      |      |      |      |      |      |      |      |      |      |      |      |      |          |   |    |   |                |                                  |                |  |                                  |                |                |                |                |                |                |                |                                  |                |                |                |                |                 |                |                 |                 |                 |           |       |       |       |       |       |       |  |       |       |       |       |       |      |       |       |       |       |       |       |      |       |       |       |       |       |
| Delta ppm                                                                                                                                                                                                                                                                                                                                                                                                                                                                                                                                                                                                                                                                                                                                                                                                                                                                                                                                                                                                                                                                                                                                                                                                                                                                                                                                                                                                                                                                                                                                                                                                                                                                                                                                                                                                                                                                                                                                                                                                                                                                                                                                                                                                                                                                                                                                                                                                                                                                                                                                                                                                                                                                                                                                                                                                                    | -21.9  | -13.1   | -25.4   | -16.0            | -31.0                                    | -14.6                           |                            | -12.6                            | -11.7           | -14.8          | -14.1          | -22.8             | -8.9                                                         | -22.3              | -19.4          | -13.1                            | -11.4          | -11.0          | -10.7          | -7.7           | -22.3           | -14.6          | -16.6           | -16.4           | -23.2           |         |         |         |         |         |         |         |         |         |          |          |          |          |          |                         |      |      |      |      |      |      |      |      |      |       |      |      |      |      |      |      |      |      |      |      |      |      |      |      |      |                       |      |      |      |       |       |       |      |       |       |        |       |       |       |       |       |      |       |       |       |       |       |       |       |       |       |       |      |      |      |      |      |      |       |      |      |      |      |      |      |      |      |      |      |      |      |      |      |      |      |      |      |          |   |    |   |                |                                  |                |  |                                  |                |                |                |                |                |                |                |                                  |                |                |                |                |                 |                |                 |                 |                 |           |       |       |       |       |       |       |  |       |       |       |       |       |      |       |       |       |       |       |       |      |       |       |       |       |       |

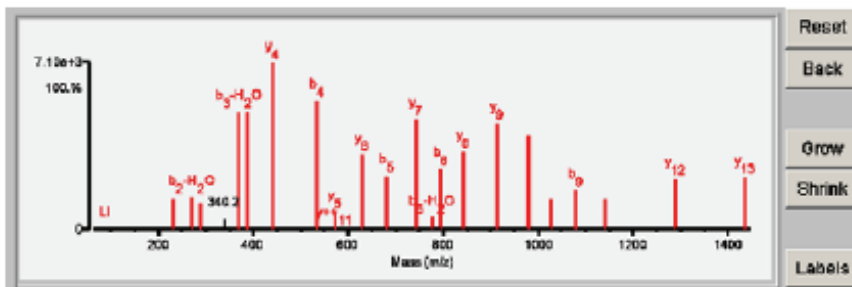

# N45

## Detailed Results

| Rank | Score | SPI (%) | BCS | # Unmatched Ions | Sequence                                                           | MH <sup>+</sup> Calculated (Da) | MH <sup>+</sup> Error (Da) | MH <sup>+</sup> Error (ppm) | Protein MWpl (Da) | Species | Accession #   | MS-Digest Index # | Protein Name                      |
|------|-------|---------|-----|------------------|--------------------------------------------------------------------|---------------------------------|----------------------------|-----------------------------|-------------------|---------|---------------|-------------------|-----------------------------------|
| 1    | 28.87 | 100.0   | 13  | 0/25             | (F)G G L I L I G I D I V I A I P K F R / A / W / Y E / V / G R (I) | 2088.0383                       | 0.0018                     | 0.8                         | 26035.18.00       | HUMAN   | P30041 431821 |                   | Perlecan-6 - Homo sapiens (Human) |

  

| Fragment-ion (m/z)      | 88.086 | 282.141 | 318.151 | 331.207 | 388.221 | 428.217 | 468.245 | 533.302 | 642.289 | 688.328 | 698.321 | 847.342 | 714.347 | 718.378 | 813.418 | 800.917 <sup>+2</sup> | 847.419 | 884.464 | 887.468 <sup>+2</sup> | 1206.688 | 1278.826 | 1376.880 | 1480.708 | 1647.742 | 1860.832 |
|-------------------------|--------|---------|---------|---------|---------|---------|---------|---------|---------|---------|---------|---------|---------|---------|---------|-----------------------|---------|---------|-----------------------|----------|----------|----------|----------|----------|----------|
| Frac. Inten. (% of TIC) | 0.03   | 4.88    | 5.96    | 0.94    | 1.35    | 15.48   | 0.91    | 0.75    | 11.38   | 0.71    | 2.82    | 0.92    | 5.38    | 1.15    | 7.05    | 1.48                  | 1.07    | 3.58    | 1.05                  | 16.28    | 9.53     | 1.40     | 1.13     | 3.92     | 0.85     |
| Rel. Inten. (% of BP)   | 0.16   | 29.98   | 36.56   | 5.75    | 8.28    | 95.08   | 5.52    | 4.60    | 69.90   | 4.39    | 17.34   | 5.67    | 33.06   | 7.09    | 43.30   | 9.09                  | 6.57    | 22.01   | 6.47                  | 100.00   | 58.51    | 8.52     | 6.95     | 24.11    | 5.19     |
| Score                   | 0.22   | 1.50    | 0.50    | 1.50    | 0.75    | 0.50    | 0.75    | 1.50    | 0.50    | 0.75    | 0.50    | 1.50    | 0.50    | 1.50    | 0.50    | 1.50                  | 1.50    | 0.50    | 1.50                  | 1.50     | 1.50     | 1.50     | 1.50     | 1.50     | 1.50     |
| Ion-type                | L1     | y1      | b3      | y1      | LLGD    | b4      | LGDVA   | y5      | b5      | LLGDVA  | b5      | y6      | b7      | y7      | b8      | y16 <sup>+2</sup>     | y6      | b9      | y17 <sup>+2</sup>     | y11      | y12      | y13      | y14      | y15      | y16      |
| Delta ppm               | -4.9   | 0.4     | -9.7    | -4.0    | -10.0   | -2.8    | -3.9    | -3.7    | -4.4    | -7.8    | -4.4    | -7.4    | -5.0    | -5.2    | -3.3    | -1.2                  | -9.6    | -2.2    | -2.1                  | -2.6     | -2.5     | -2.2     | -10.3    | -1.8     | 1.9      |

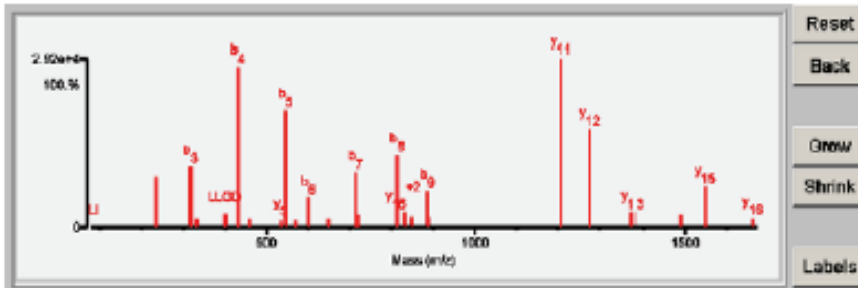

# N46

## Detailed Results

| Rank | Score | SPI (%) | BCS | # Unmatched Ions | Sequence                                           | MH <sup>+</sup> Calculated (Da) | MH <sup>+</sup> Error (Da) | MH <sup>+</sup> Error (ppm) | Protein MWpl (Da) | Species | Accession #   | MS-Digest Index # | Protein Name                                                                 |
|------|-------|---------|-----|------------------|----------------------------------------------------|---------------------------------|----------------------------|-----------------------------|-------------------|---------|---------------|-------------------|------------------------------------------------------------------------------|
| 1    | 15.71 | 72.0    | 9   | 9/25             | (P)G H I L I Q I E I G F / G C V / V / T N / R (F) | 1604.7308                       | 0.0039                     | 2.4                         | 44965.6/8.66      | HUMAN   | Q8NC51 399931 |                   | Plasminogen activator inhibitor 1 RNA-binding protein - Homo sapiens (Human) |

  

| Fragment-ion (m/z)      | 86.095 | 110.067 | 175.120 | 283.084 | 284.089 | 390.200 | 396.168 | 489.280 | 519.240 | 524.227 | 653.253 | 724.408           | 730.338 <sup>+2</sup> | 737.341 <sup>+2</sup> | 748.366 | 755.812 <sup>+2</sup> | 771.368 | 775.087 | 856.383 | 857.879 | 938.898 | 952.449 | 1081.501 | 1209.558 | 1322.644 |
|-------------------------|--------|---------|---------|---------|---------|---------|---------|---------|---------|---------|---------|-------------------|-----------------------|-----------------------|---------|-----------------------|---------|---------|---------|---------|---------|---------|----------|----------|----------|
| Frac. Inten. (% of TIC) | 0.07   | 0.16    | 3.18    | 15.90   | 3.04    | 2.94    | 7.85    | 2.65    | 2.32    | 3.16    | 2.64    | 2.27              | 2.23                  | 2.68                  | 4.43    | 3.76                  | 4.79    | 2.22    | 3.27    | 2.90    | 3.05    | 8.73    | 5.89     | 6.02     | 3.24     |
| Rel. Inten. (% of BP)   | 0.42   | 0.98    | 20.03   | 100.00  | 19.15   | 18.52   | 49.37   | 16.68   | 14.59   | 19.90   | 16.59   | 14.28             | 14.01                 | 16.86                 | 27.88   | 23.67                 | 30.12   | 13.98   | 20.57   | 18.23   | 19.18   | 64.94   | 37.03    | 41.86    | 20.35    |
| Score                   | 0.22   | 1.00    | 1.50    | 0.50    | -0.19   | 1.50    | 0.50    | 1.50    | 0.75    | 0.50    | 0.50    | -0.14             | 1.50                  | -0.17                 | 1.50    | -0.24                 | -0.30   | -0.14   | -0.21   | -0.18   | -0.19   | 1.50    | 1.50     | 1.50     | 1.50     |
| Ion-type                | L1     | H       | y1      | b2      |         | y3      | b3      | y4      | QEGFG   | b4      | b5      | y13 <sup>+2</sup> | y7                    |                       |         |                       |         |         |         |         |         | y9      | y10      | y11      | y12      |
| Delta ppm               | -21.2  | -36.1   | 4.3     | -12.5   |         | -23.5   | -6.6    | 3.3     | 37.0    | -4.9    | -30.0   | -28.5             | -14.3                 |                       |         |                       |         |         |         |         |         | -18.6   | -7.7     | -8.3     | -6.5     |

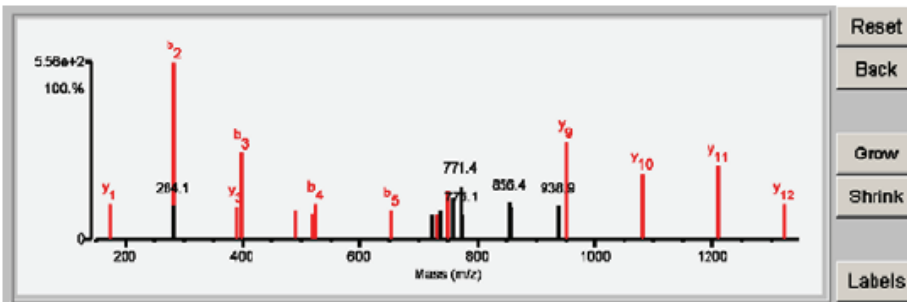

# N47

## Detailed Results

| Rank | Score | SPI (%) | BCS | # Unmatched Ions | Sequence                              | MH <sup>+</sup> Calculated (Da) | MH <sup>+</sup> Error (Da) | MH <sup>+</sup> Error (ppm) | Protein MW/pI (Da) | Species | Accession #            | MS-Digest Index #      | Protein Name                                           |
|------|-------|---------|-----|------------------|---------------------------------------|---------------------------------|----------------------------|-----------------------------|--------------------|---------|------------------------|------------------------|--------------------------------------------------------|
| 1    | 10.38 | 75.8    | 4   | 12/25            | (P) L / P / V / A / L / Q / T / R (L) | 985.5488                        | 0.0058                     | 5.9                         | 30472.4/5.92       | HUMAN   | <a href="#">Q80828</a> | <a href="#">431011</a> | Polyglutamine-binding protein 1 - Homo sapiens (Human) |

  

| Fragment-Ion (m/z)      | 70.085 | 72.080 | 88.098 | 120.079 | 130.048 | 138.076 | 168.080 | 188.130 | 170.139 | 174.093 | 176.110 | 197.128 | 288.168 | 367.152 | 388.221 | 392.738 | 395.236 | 404.228 <sup>+2</sup> | 492.187 | 517.311 | 543.223 | 570.287 | 588.360 | 687.413 | 784.475 |
|-------------------------|--------|--------|--------|---------|---------|---------|---------|---------|---------|---------|---------|---------|---------|---------|---------|---------|---------|-----------------------|---------|---------|---------|---------|---------|---------|---------|
| Frac. Inten. (% of TIC) | 0.02   | 0.05   | 0.39   | 4.07    | 1.53    | 2.12    | 1.55    | 11.83   | 1.75    | 2.94    | 2.35    | 6.12    | 2.60    | 1.50    | 1.76    | 10.66   | 1.51    | 2.63                  | 1.70    | 4.65    | 2.03    | 1.48    | 22.40   | 9.30    | 3.08    |
| Rel. Inten. (% of BP)   | 0.10   | 0.22   | 1.73   | 18.16   | 6.83    | 9.45    | 6.92    | 52.79   | 7.80    | 13.11   | 10.50   | 27.32   | 11.60   | 6.68    | 7.85    | 47.59   | 6.73    | 11.72                 | 7.58    | 20.74   | 9.05    | 6.61    | 100.00  | 41.53   | 13.76   |
| Score                   | 0.20   | 0.50   | 0.22   | -0.18   | -0.07   | -0.09   | 0.50    | 0.50    | -0.08   | 0.50    | -0.10   | 0.75    | 0.75    | -0.07   | -0.08   | 1.50    | -0.07   | -0.12                 | -0.08   | 1.50    | -0.09   | -0.07   | 1.50    | 1.50    | 1.50    |
| Ion-type                | PR     | V      | LI     |         |         |         | Y1-NH3  | PV-28   |         | 31      |         | PV      | PVA     |         |         | Y++7    |         |                       |         | Y4      |         |         | Y5      | Y6      | Y7      |
| Delta ppm               | -1.8   | -14.9  | -10.8  |         |         |         | 0.6     | -9.7    |         | -14.4   |         | -20.0   | 3.1     |         |         | 1.0     |         |                       |         | 3.7     |         |         | 5.6     | -2.3    | 9.6     |

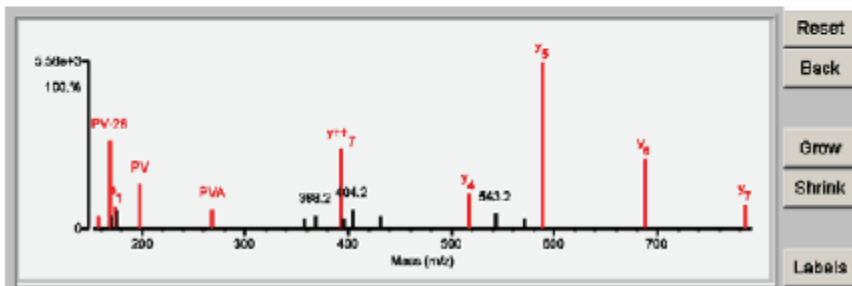

# N48

## Detailed Results

| Rank | Score | SPI (%) | BCS | # Unmatched Ions | Sequence                                                  | MH <sup>+</sup> Calculated (Da) | MH <sup>+</sup> Error (Da) | MH <sup>+</sup> Error (ppm) | Protein MW/pI (Da) | Species | Accession #            | MS-Digest Index #      | Protein Name                                                        |
|------|-------|---------|-----|------------------|-----------------------------------------------------------|---------------------------------|----------------------------|-----------------------------|--------------------|---------|------------------------|------------------------|---------------------------------------------------------------------|
| 1    | 13.38 | 82.1    | 7   | 8/25             | (P) G / P / T / P / S / G / T / M / V / G / S / G / R (3) | 1381.8114                       | 0.0016                     | 1.1                         | 9874.5/11.57       | HUMAN   | <a href="#">P80498</a> | <a href="#">585058</a> | Protein transport protein Sec61 subunit beta - Homo sapiens (Human) |

  

| Fragment-Ion (m/z)      | 70.085 | 171.110 | 186.104 | 243.078 | 248.054 | 257.067 | 286.117 | 318.128 | 344.132 | 388.642 | 408.202 | 423.158 | 483.210 | 500.738 <sup>+2</sup> | 608.743 <sup>+2</sup> | 683.948 | 686.288 <sup>+2</sup> | 689.778 <sup>+2</sup> | 808.814 <sup>+2</sup> | 819.808 | 786.380 | 834.385 | 900.038 | 921.422 | 1018.507 |
|-------------------------|--------|---------|---------|---------|---------|---------|---------|---------|---------|---------|---------|---------|---------|-----------------------|-----------------------|---------|-----------------------|-----------------------|-----------------------|---------|---------|---------|---------|---------|----------|
| Frac. Inten. (% of TIC) | 0.00   | 9.57    | 5.85    | 1.79    | 2.35    | 2.62    | 1.52    | 5.17    | 9.77    | 1.49    | 1.59    | 1.77    | 1.85    | 3.16                  | 13.67                 | 1.66    | 1.98                  | 4.51                  | 4.62                  | 2.90    | 1.70    | 5.30    | 1.61    | 2.27    | 11.15    |
| Rel. Inten. (% of BP)   | 0.02   | 70.05   | 42.90   | 13.12   | 17.17   | 19.19   | 11.88   | 37.87   | 71.47   | 10.93   | 11.64   | 12.98   | 13.54   | 23.15                 | 100.00                | 12.13   | 14.49                 | 33.00                 | 33.80                 | 21.23   | 12.45   | 38.78   | 11.77   | 16.54   | 81.61    |
| Score                   | 0.20   | 0.50    | 0.75    | 0.50    | -0.17   | -0.19   | -0.12   | 0.50    | 0.50    | -0.11   | 1.50    | 0.25    | 1.50    | 0.50                  | -0.12                 | -0.14   | -0.14                 | 0.50                  | 1.50                  | -0.21   | -0.12   | 1.50    | -0.12   | 1.50    | 1.50     |
| Ion-type                | PR     | TP-28   | TP      | b2      |         |         | 88      | b3      | 36      | b4+H2O  | 36      | b4+H2O  | 36      | Y11+H2O <sup>+2</sup> | Y11 <sup>+2</sup>     |         |                       | Y13+H2O <sup>+2</sup> | Y13 <sup>+2</sup>     |         |         | 39      | 39      | 39      | 39       |
| Delta ppm               | 35.3   | -32.8   | -23.2   | -12.7   |         |         | -13.8   | 10.5    |         |         | -7.3    | -33.9   | -34.6   | -11.1                 | -11.3                 |         |                       | -30.3                 | 23.9                  |         |         | -13.3   | -18.1   | 15.5    |          |

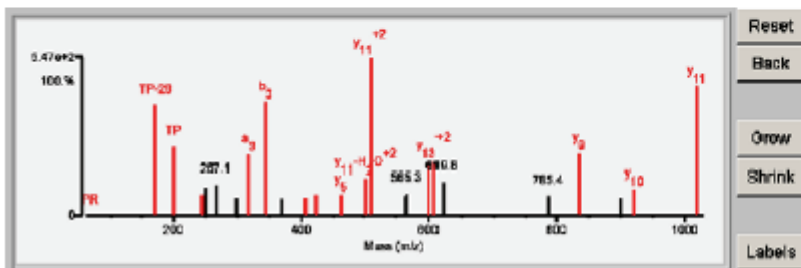



# N49

## Detailed Results

| Rank | Score | SPI (%) | BCS | # Unmatched Ions | Sequence                                                                            | MH <sup>+</sup> Calculated (Da) | MH <sup>+</sup> Error (Da) | MH <sup>+</sup> Error (ppm) | Protein MWipl (Da) | Species | Accession #            | MS-Digest Index #      | Protein Name                                                           |
|------|-------|---------|-----|------------------|-------------------------------------------------------------------------------------|---------------------------------|----------------------------|-----------------------------|--------------------|---------|------------------------|------------------------|------------------------------------------------------------------------|
| 1    | 14.47 | 71.5    | 8   | 10/25            | (V) M <sup>+</sup> Σ <sup>+</sup> K <sup>+</sup> /P/S/P L L <sup>+</sup> /V/G/R (E) | 1449.7051                       | 0.0080                     | 5.5                         | 52164.5/5.37       | HUMAN   | <a href="#">Q13283</a> | <a href="#">194989</a> | Ras GTPase-activating protein-binding protein 1 - Homo sapiens (Human) |
| 1    | 14.47 | 71.5    | 8   | 10/25            | (V) M <sup>+</sup> Σ <sup>+</sup> K <sup>+</sup> /P/S/P L L <sup>+</sup> /V/G/R (E) | 1449.7051                       | 0.0080                     | 5.5                         | 54121.4/5.41       | HUMAN   | <a href="#">Q9UN86</a> | <a href="#">194995</a> | Ras GTPase-activating protein-binding protein 2 - Homo sapiens (Human) |

  

| Fragment-ion (m/z)      | 70.066 | 72.081 | 84.081 | 86.096 | 94.067 | 102.055 | 136.074 | 143.062 | 144.048 | 175.121 | 192.051 | 220.048 | 232.144 | 300.098          | 327.716 | 331.207 | 349.089          | 419.766 <sup>+2</sup> | 504.793 <sup>+2</sup> | 519.138 | 654.429 | 656.371 <sup>+2</sup> | 741.452 | 838.517 | 1008.569 |
|-------------------------|--------|--------|--------|--------|--------|---------|---------|---------|---------|---------|---------|---------|---------|------------------|---------|---------|------------------|-----------------------|-----------------------|---------|---------|-----------------------|---------|---------|----------|
| Frac. Inten. (% of TIC) | 0.00   | 0.05   | 5.38   | 0.13   | 2.25   | 0.13    | 1.54    | 1.51    | 3.73    | 1.53    | 2.00    | 7.88    | 2.32    | 3.53             | 2.38    | 2.21    | 11.50            | 6.99                  | 2.70                  | 3.56    | 3.12    | 1.76                  | 1.31    | 30.00   | 2.48     |
| Rel. Inten. (% of BP)   | 0.01   | 0.16   | 17.94  | 0.44   | 7.50   | 0.44    | 5.15    | 5.03    | 12.43   | 5.10    | 6.67    | 26.25   | 7.73    | 11.76            | 7.95    | 7.36    | 38.33            | 23.29                 | 8.99                  | 11.88   | 10.39   | 5.88                  | 4.35    | 100.00  | 8.28     |
| Score                   | 0.20   | 0.50   | -0.18  | 0.22   | -0.07  | 1.00    | -0.05   | -0.05   | -0.12   | 1.50    | 0.50    | 0.50    | 1.50    | -0.12            | 1.50    | 1.50    | 0.50             | 1.50                  | -0.09                 | -0.12   | 1.50    | -0.06                 | 1.50    | 1.50    | -0.08    |
| Ion-type                | PR     | V      |        | LI     |        | E       |         |         | y1      | a1      | b1      | y2      |         | y <sup>++6</sup> | y3      | b2      | y <sup>8+2</sup> |                       |                       | y6      |         | y7                    | y8      |         |          |
| Delta ppm               | 12.5   | -1.0   |        | -3.8   |        | -0.5    |         |         | 12.3    | -4.8    | 4.8     | 14.6    |         | -6.4             | -6.5    | -3.0    | 11.5             |                       |                       | -1.3    |         | -12.6                 | -12.6   | 3.4     |          |

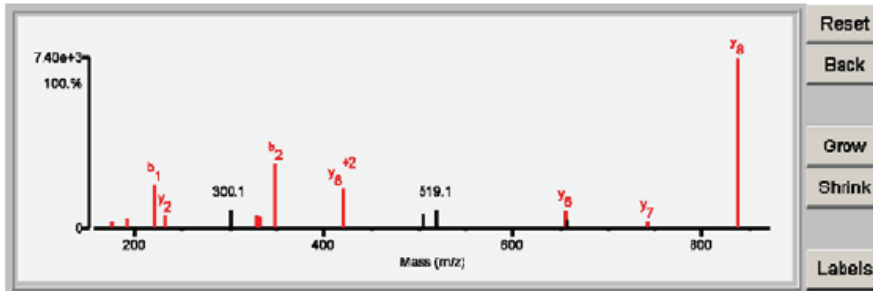

# N50

## Detailed Results

| Rank | Score | SPI (%) | BCS | # Unmatched Ions | Sequence                                                                                                   | MH <sup>+</sup> Calculated (Da) | MH <sup>+</sup> Error (Da) | MH <sup>+</sup> Error (ppm) | Protein MWipl (Da) | Species | Accession #            | MS-Digest Index #      | Protein Name                                                |
|------|-------|---------|-----|------------------|------------------------------------------------------------------------------------------------------------|---------------------------------|----------------------------|-----------------------------|--------------------|---------|------------------------|------------------------|-------------------------------------------------------------|
| 1    | 21.08 | 91.9    | 11  | 3/25             | (P) W <sup>+</sup> I <sup>+</sup> V <sup>+</sup> L <sup>+</sup> /P/S/G S S <sup>+</sup> /R/Q D/L/S Q/R (V) | 1875.9018                       | 0.0126                     | 6.7                         | 34769.3/6.15       | HUMAN   | <a href="#">P11908</a> | <a href="#">436229</a> | Ribose-phosphate pyrophosphokinase 2 - Homo sapiens (Human) |

  

| Fragment-ion (m/z)      | 70.064 | 72.080 | 86.097 | 101.070 | 110.071 | 120.080 | 175.117 | 203.048 | 213.156 | 271.110 | 288.140 | 302.182 | 316.135 | 390.209 | 415.199 | 442.228 <sup>+2</sup> | 503.293 | 557.777           | 591.277 | 601.287 <sup>+2</sup> | 674.817 <sup>+2</sup> | 722.350 <sup>+2</sup>              | 731.362 <sup>+2</sup> | 746.371 | 780.898 <sup>+2</sup> |
|-------------------------|--------|--------|--------|---------|---------|---------|---------|---------|---------|---------|---------|---------|---------|---------|---------|-----------------------|---------|-------------------|---------|-----------------------|-----------------------|------------------------------------|-----------------------|---------|-----------------------|
| Frac. Inten. (% of TIC) | 0.00   | 0.14   | 0.81   | 0.07    | 0.17    | 0.19    | 4.27    | 2.46    | 2.51    | 3.14    | 4.94    | 2.21    | 12.85   | 2.40    | 4.84    | 2.80                  | 2.88    | 2.73              | 2.77    | 10.90                 | 11.40                 | 2.37                               | 13.78                 | 2.35    | 7.21                  |
| Rel. Inten. (% of BP)   | 0.02   | 1.02   | 5.90   | 0.48    | 1.23    | 1.35    | 30.95   | 17.86   | 18.24   | 22.77   | 35.84   | 16.04   | 91.79   | 17.43   | 35.09   | 20.32                 | 20.91   | 19.82             | 20.13   | 79.09                 | 82.71                 | 17.18                              | 100.00                | 17.05   | 52.30                 |
| Score                   | 0.20   | 0.50   | 0.22   | 0.50    | 1.00    | 1.00    | 1.50    | 0.50    | 0.75    | -0.23   | 0.50    | -0.18   | 0.50    | 1.50    | 0.50    | 1.50                  | 1.50    | 1.50              | -0.20   | 1.50                  | 1.50                  | 0.50                               | 1.50                  | 1.50    | 1.50                  |
| Ion-type                | PR     | V      | LI     | QK      | H       | F       | y1      | b1      | VL      |         | a2      | b2      | b3      | y3      | b3      | y <sup>7+2</sup>      | y4      | y <sup>++10</sup> |         | y11 <sup>+2</sup>     | y12 <sup>+2</sup>     | y13-H <sub>2</sub> O <sup>+2</sup> | y13 <sup>+2</sup>     | y6      | y14 <sup>+2</sup>     |
| Delta ppm               | -20.3  | -8.0   | 4.3    | -5.3    | -6.1    | -6.5    | -11.1   | -9.8    | -20.9   |         | 3.3     |         | 5.5     | -2.7    | -8.1    | 11.9                  | -2.0    | 20.9              |         | 9.1                   | 1.6                   | -3.5                               | 6.2                   | -11.4   | 7.7                   |

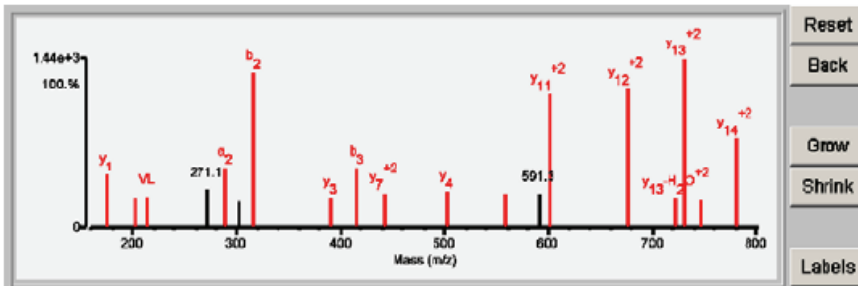



# N51

## Detailed Results

| Rank | Score | SPI (%) | BCS | # Unmatched Ions | Sequence            | MH <sup>+</sup> Calculated (Da) | MH <sup>+</sup> Error (Da) | MH <sup>+</sup> Error (ppm) | Protein MW/Pl (Da) | Species | Accession #            | MS-Digest Index #      | Protein Name                                  |
|------|-------|---------|-----|------------------|---------------------|---------------------------------|----------------------------|-----------------------------|--------------------|---------|------------------------|------------------------|-----------------------------------------------|
| 1    | 12.25 | 66.7    | 7   | 11/25            | (V)KILFIZGNL/P/R(E) | 1280.6642                       | 0.0045                     | 3.5                         | 40148.8/6.28       | HUMAN   | <a href="#">Q9BQ04</a> | <a href="#">470753</a> | RNA-binding protein 4B - Homo sapiens (Human) |
| 1    | 12.25 | 66.7    | 7   | 11/25            | (V)KILFIZGNL/P/R(E) | 1280.6642                       | 0.0045                     | 3.5                         | 40314.1/6.61       | HUMAN   | <a href="#">Q9BWF3</a> | <a href="#">470765</a> | RNA-binding protein 4 - Homo sapiens (Human)  |

  

| Fragment-ion (m/z)     | 70.065 | 84.080 | 86.097 | 87.101 | 94.064 | 95.068 | 120.080 | 175.120 | 219.093 | 233.164 | 255.147 | 259.056 | 260.055 | 261.163 | 272.171 | 352.115 | 372.138 | 388.107 | 499.285 | 519.214 | 556.320 | 669.403 | 816.465 | 929.562 | 1187.643 |
|------------------------|--------|--------|--------|--------|--------|--------|---------|---------|---------|---------|---------|---------|---------|---------|---------|---------|---------|---------|---------|---------|---------|---------|---------|---------|----------|
| Frac. Inten.(% of TIC) | 0.00   | 2.73   | 0.80   | 1.53   | 5.60   | 1.21   | 0.13    | 1.92    | 1.47    | 2.94    | 1.82    | 2.29    | 1.21    | 1.46    | 5.11    | 2.98    | 7.39    | 1.57    | 1.50    | 6.40    | 17.31   | 16.01   | 9.08    | 6.02    | 1.96     |
| Rel. Inten.(% of BP)   | 0.01   | 15.78  | 3.48   | 8.82   | 32.34  | 6.97   | 0.75    | 11.08   | 8.48    | 16.99   | 9.34    | 13.22   | 6.99    | 8.45    | 29.54   | 17.19   | 42.71   | 9.06    | 8.66    | 36.96   | 100.00  | 92.47   | 52.31   | 34.78   | 11.27    |
| Score                  | 0.20   | -0.16  | 0.22   | -0.09  | -0.32  | -0.07  | 1.00    | 1.50    | -0.08   | 0.50    | 0.50    | -0.13   | -0.07   | 0.75    | 1.50    | 0.50    | -0.43   | -0.09   | 1.50    | 1.50    | 1.50    | 1.50    | 1.50    | 1.50    | -0.11    |
| Ion-type               | PR     |        | LI     |        |        |        | F       | y1      |         | FI-28   | y2-NH3  |         |         | FI      | y2      | b1      |         |         | y4      |         | y5      | y6      | y7      | y8      |          |
| Delta ppm              | -6.1   |        | 12.5   |        |        |        | -9.8    | 6.6     |         | -10.5   | 6.8     |         |         | 6.7     | -4.1    | -2.5    |         |         | -28.3   |         |         | -2.6    | -9.4    | 5.9     |          |

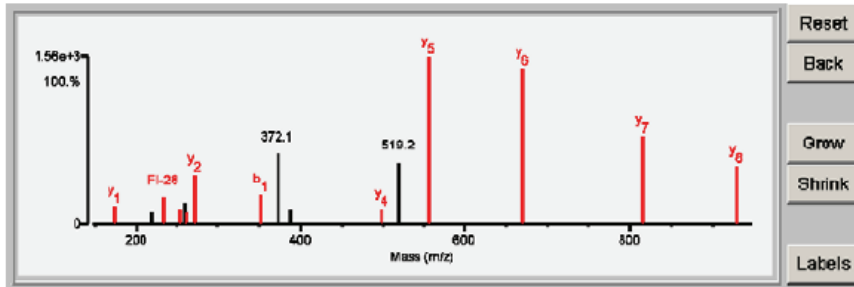

# N52

## Detailed Results

| Rank | Score | SPI (%) | BCS | # Unmatched Ions | Sequence                     | MH <sup>+</sup> Calculated (Da) | MH <sup>+</sup> Error (Da) | MH <sup>+</sup> Error (ppm) | Protein MW/Pl (Da) | Species | Accession #            | MS-Digest Index #      | Protein Name                                    |
|------|-------|---------|-----|------------------|------------------------------|---------------------------------|----------------------------|-----------------------------|--------------------|---------|------------------------|------------------------|-------------------------------------------------|
| 1    | 15.32 | 80.7    | 9   | 6/25             | (A)PVLZBIVIVIAIDVAGAFIL/R(H) | 1568.7890                       | 0.0055                     | 3.5                         | 46675.2/6.72       | HUMAN   | <a href="#">Q9ULX3</a> | <a href="#">374303</a> | RNA-binding protein NOB1 - Homo sapiens (Human) |

  

| Fragment-ion (m/z)     | 70.064 | 72.079 | 84.044 | 86.096 | 102.053 | 104.058 | 110.071 | 120.080 | 158.063 | 175.116 | 186.057 | 285.132 | 364.112 | 393.203 | 540.262 | 551.231          | 578.317 <sup>+2</sup> | 634.363 | 650.306 | 723.350 <sup>+2</sup> | 749.384 | 820.413 | 919.496 | 962.431 | 1018.554 |
|------------------------|--------|--------|--------|--------|---------|---------|---------|---------|---------|---------|---------|---------|---------|---------|---------|------------------|-----------------------|---------|---------|-----------------------|---------|---------|---------|---------|----------|
| Frac. Inten.(% of TIC) | 0.01   | 0.14   | 0.15   | 0.52   | 0.09    | 2.88    | 0.25    | 0.10    | 3.28    | 7.65    | 8.47    | 5.28    | 2.99    | 4.12    | 3.63    | 10.43            | 6.00                  | 6.73    | 8.01    | 2.88                  | 3.46    | 5.28    | 8.86    | 2.84    | 5.97     |
| Rel. Inten.(% of BP)   | 0.09   | 1.34   | 1.39   | 4.94   | 0.62    | 27.58   | 2.42    | 0.94    | 31.43   | 73.31   | 81.18   | 50.65   | 28.64   | 39.54   | 34.82   | 100.00           | 57.54                 | 64.53   | 76.74   | 27.62                 | 33.16   | 50.59   | 84.88   | 27.24   | 57.20    |
| Score                  | 0.20   | 0.50   | 1.00   | 0.22   |         | -0.28   | 1.00    | 1.00    | 0.50    | 1.50    | 0.50    | 0.50    | -0.29   | -0.40   | -0.35   | 0.50             | 1.50                  | 1.50    | 0.75    | -0.28                 | 1.50    | 1.50    | 1.50    | -0.27   | 1.50     |
| Ion-type               | PR     | V      | E      | LI     | E       |         | H       | F       | a1      | y1      | b1      | b2      |         |         | b4      | y1 <sup>+2</sup> | y8                    |         | b5      |                       | b6      | b7      | y9      |         | y10      |
| Delta ppm              | -10.4  | -26.0  | -2.3   | -1.5   |         |         | -6.1    | -6.5    | -9.5    | -16.9   | -13.0   | 12.8    |         |         | 2.3     | -0.9             | -6.8                  |         | 13.0    |                       | -13.7   | -22.0   |         | -13.4   |          |

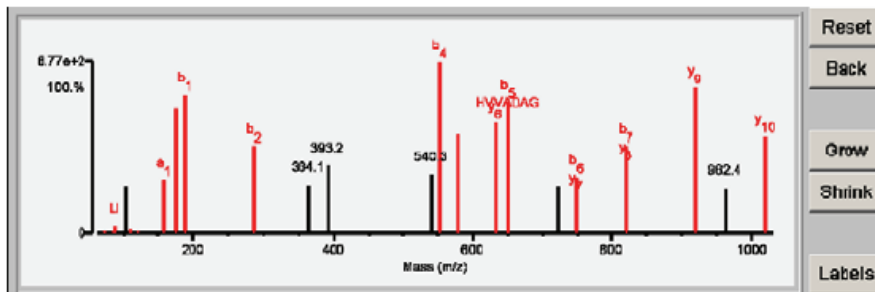

# N53

## Detailed Results

| Rank | Score | SP1 (%) | BC3 | # Unmatched ions | Sequence                          | MH <sup>+</sup> Calculated (Da) | MH <sup>+</sup> Error (Da) | MH <sup>+</sup> Error (ppm) | Protein MW/pi (Da) | Species | Accession #            | MS-Digest Index #      | Protein Name                                    |
|------|-------|---------|-----|------------------|-----------------------------------|---------------------------------|----------------------------|-----------------------------|--------------------|---------|------------------------|------------------------|-------------------------------------------------|
| 1    | 15.45 | 67.9    | 8   | 9/25             | (P) V/E/E(V)V/A/D/A C A T L/X (H) | 1471.7362                       | 0.0057                     | 3.8                         | 48876.2/6.72       | HUMAN   | <a href="#">Q9ULX3</a> | <a href="#">374383</a> | RNA-binding protein NOB1 - Homo sapiens (Human) |

  

| Fragment-Ion (m/z)      | 80.043 | 70.084 | 72.078 | 88.088 | 94.086 | 110.072 | 120.078 | 176.122        | 207.111 | 304.130 | 322.138        | 454.178 | 520.248 <sup>+2</sup> | 553.239 <sup>+2</sup> | 578.323 <sup>+2</sup>         | 834.388        | 842.830 <sup>+2</sup>         | 862.323        | 890.040        | 892.838 | 748.393 | 820.441 | 853.390 | 919.482        | 1018.558        |
|-------------------------|--------|--------|--------|--------|--------|---------|---------|----------------|---------|---------|----------------|---------|-----------------------|-----------------------|-------------------------------|----------------|-------------------------------|----------------|----------------|---------|---------|---------|---------|----------------|-----------------|
| Frac. Inten. (% of TIC) | 3.78   | 0.00   | 0.22   | 0.58   | 3.22   | 0.43    | 0.09    | 6.69           | 3.70    | 2.86    | 3.05           | 9.89    | 3.56                  | 5.88                  | 3.44                          | 6.64           | 4.34                          | 4.03           | 3.32           | 3.08    | 5.21    | 7.08    | 3.33    | 9.32           | 6.28            |
| Rel. Inten. (% of BP)   | 38.18  | 0.04   | 2.19   | 5.88   | 32.57  | 4.35    | 0.89    | 67.58          | 37.42   | 28.91   | 30.75          | 100.00  | 35.97                 | 59.26                 | 34.80                         | 67.15          | 43.84                         | 40.78          | 33.59          | 31.18   | 52.65   | 71.55   | 33.65   | 94.24          | 63.49           |
| Score                   | -0.38  | 0.20   | 0.50   | 0.22   | -0.33  | 1.00    | 1.00    | 1.50           | 0.75    | -0.29   | -0.31          | 0.50    | -0.36                 | -0.59                 | 1.50                          | 1.50           | 1.50                          | 0.50           | -0.34          | -0.31   | 1.50    | 1.50    | -0.34   | 1.50           | 1.50            |
| Ion-type                |        | PR     | V      | LI     |        | H       | F       | y <sub>1</sub> | EH      |         | b <sub>3</sub> |         |                       |                       | y <sub>11</sub> <sup>+2</sup> | y <sub>6</sub> | y <sub>12</sub> <sup>+2</sup> | b <sub>5</sub> | y <sub>7</sub> |         |         |         |         | y <sub>6</sub> | y <sub>10</sub> |
| Delta ppm               |        | -17.5  | -37.1  | -4.9   |        | 8.4     | -16.5   | 19.7           | 2.3     |         | 4.5            |         |                       |                       | 11.1                          | 3.4            | -12.9                         | 14.9           |                |         | -1.3    | 11.4    |         | -8.3           | -8.7            |

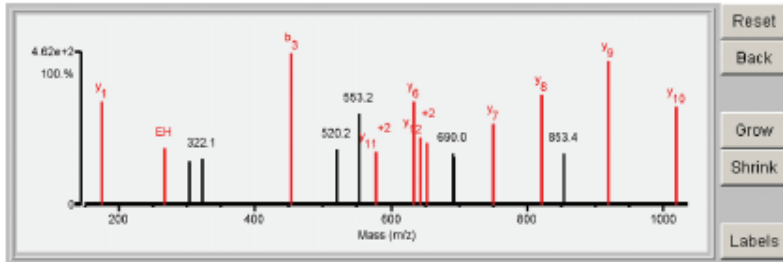

# N54

## Detailed Results

| Rank | Score | SP1 (%) | BC3 | # Unmatched ions | Sequence              | MH <sup>+</sup> Calculated (Da) | MH <sup>+</sup> Error (Da) | MH <sup>+</sup> Error (ppm) | Protein MW/pi (Da) | Species | Accession #            | MS-Digest Index #      | Protein Name                                              |
|------|-------|---------|-----|------------------|-----------------------|---------------------------------|----------------------------|-----------------------------|--------------------|---------|------------------------|------------------------|-----------------------------------------------------------|
| 1    | 16.44 | 94.9    | 8   | 6/25             | (V) L/D(L)D/L/Y/R (V) | 876.4817                        | 0.0022                     | 2.2                         | 58777.8/8.05       | HUMAN   | <a href="#">P48681</a> | <a href="#">828417</a> | Geryl-tRNA synthetase, cytoplasmic - Homo sapiens (Human) |

  

| Fragment-Ion (m/z)      | 88.067 | 88.088 | 94.083 | 120.081 | 132.103 | 168.084                         | 174.085        | 175.116        | 177.045 | 201.123 | 202.089        | 203.088 | 228.115 | 305.182                         | 317.108        | 322.185        | 344.147 | 402.186        | 430.204        | 435.287        | 632.287                          | 660.287        | 683.387        | 780.380                          | 778.408        |
|-------------------------|--------|--------|--------|---------|---------|---------------------------------|----------------|----------------|---------|---------|----------------|---------|---------|---------------------------------|----------------|----------------|---------|----------------|----------------|----------------|----------------------------------|----------------|----------------|----------------------------------|----------------|
| Frac. Inten. (% of TIC) | 0.69   | 1.02   | 1.13   | 0.05    | 1.02    | 1.20                            | 17.81          | 5.82           | 0.92    | 4.93    | 7.72           | 1.00    | 1.68    | 1.43                            | 1.77           | 2.90           | 3.02    | 0.78           | 0.82           | 6.46           | 0.83                             | 12.53          | 7.70           | 0.80                             | 15.98          |
| Rel. Inten. (% of BP)   | 3.86   | 5.75   | 6.37   | 0.29    | 5.72    | 6.71                            | 100.00         | 32.71          | 5.15    | 27.70   | 43.37          | 5.60    | 9.46    | 8.04                            | 9.92           | 16.28          | 16.98   | 4.36           | 4.59           | 36.26          | 4.68                             | 70.40          | 43.22          | 4.47                             | 89.73          |
| Score                   | 0.22   | -0.06  | -0.06  | 1.00    | -0.06   | 0.50                            | 0.50           | 1.50           | -0.05   | 0.50    | 0.50           | -0.06   | 0.75    | 0.50                            | 0.50           | 1.50           | 0.75    | 0.50           | 0.50           | 1.50           | 0.50                             | 1.50           | 1.50           | 0.50                             | 1.50           |
| Ion-type                |        | LI     |        |         | F       | y <sub>1</sub> -NH <sub>3</sub> | a <sub>1</sub> | y <sub>1</sub> |         | DL-28   | b <sub>1</sub> |         | DL      | y <sub>2</sub> -NH <sub>3</sub> | b <sub>2</sub> | y <sub>2</sub> | DLD     | a <sub>3</sub> | b <sub>3</sub> | y <sub>3</sub> | y <sub>4</sub> -H <sub>2</sub> O | y <sub>4</sub> | y <sub>5</sub> | y <sub>5</sub> -H <sub>2</sub> O | y <sub>5</sub> |
| Delta ppm               |        | 9.0    |        |         | 4.4     | 6.9                             | -5.2           | -4.9           |         | -6.8    | -6.1           |         | -20.4   | 4.5                             | -29.2          | -6.4           | 3.4     | -29.9          | 4.6            | -9.7           | -1.0                             | -2.7           | 7.5            | -25.0                            | -0.6           |

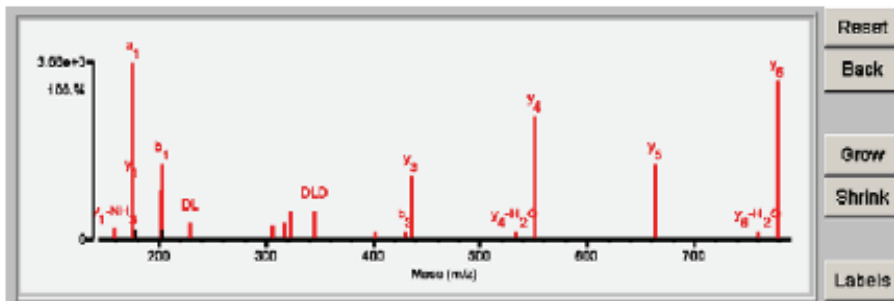

# N55

## Detailed Results

| Rank                                                                                                                                                                                                                                                                                                                                                                                                                                                                                                                                                                                                                                                                                                                                                                                                                                                                                                                                                                                                                                                                                                                                                                                                                                                                                                                                                                                                                                                                                                                                                                                                                                                                                                                                                                                                                                                                                                                                                                                                                                                                                                                                                                                                                                                                                                                                                                                                                                                                                                                         | Score  | SP1 (%) | BC8    | # Unmatched Ions | Sequence                      | MH <sup>+</sup> Calculated (Da) | MH <sup>+</sup> Error (Da) | MH <sup>+</sup> Error (ppm) | Protein MW/pI (Da) | Species | Accession # | MS-Digest Index # | Protein Name                                                             |                    |         |         |         |         |         |         |         |         |         |         |          |         |         |         |         |         |         |         |         |         |         |         |         |         |          |                         |      |      |      |      |      |      |      |      |      |      |      |      |      |      |      |      |      |      |      |      |       |      |       |      |      |                       |       |      |       |      |       |       |       |       |       |       |       |       |       |       |       |       |      |       |       |       |       |       |        |       |       |       |       |      |       |      |      |      |      |      |      |      |      |      |      |       |      |      |      |      |      |      |      |      |      |      |      |          |  |    |  |   |       |    |    |    |    |        |    |    |     |        |    |        |    |    |    |    |        |    |    |    |    |           |  |      |  |      |       |      |     |      |       |      |     |      |       |  |       |       |     |     |     |     |       |       |      |       |       |
|------------------------------------------------------------------------------------------------------------------------------------------------------------------------------------------------------------------------------------------------------------------------------------------------------------------------------------------------------------------------------------------------------------------------------------------------------------------------------------------------------------------------------------------------------------------------------------------------------------------------------------------------------------------------------------------------------------------------------------------------------------------------------------------------------------------------------------------------------------------------------------------------------------------------------------------------------------------------------------------------------------------------------------------------------------------------------------------------------------------------------------------------------------------------------------------------------------------------------------------------------------------------------------------------------------------------------------------------------------------------------------------------------------------------------------------------------------------------------------------------------------------------------------------------------------------------------------------------------------------------------------------------------------------------------------------------------------------------------------------------------------------------------------------------------------------------------------------------------------------------------------------------------------------------------------------------------------------------------------------------------------------------------------------------------------------------------------------------------------------------------------------------------------------------------------------------------------------------------------------------------------------------------------------------------------------------------------------------------------------------------------------------------------------------------------------------------------------------------------------------------------------------------|--------|---------|--------|------------------|-------------------------------|---------------------------------|----------------------------|-----------------------------|--------------------|---------|-------------|-------------------|--------------------------------------------------------------------------|--------------------|---------|---------|---------|---------|---------|---------|---------|---------|---------|---------|----------|---------|---------|---------|---------|---------|---------|---------|---------|---------|---------|---------|---------|---------|----------|-------------------------|------|------|------|------|------|------|------|------|------|------|------|------|------|------|------|------|------|------|------|------|-------|------|-------|------|------|-----------------------|-------|------|-------|------|-------|-------|-------|-------|-------|-------|-------|-------|-------|-------|-------|-------|------|-------|-------|-------|-------|-------|--------|-------|-------|-------|-------|------|-------|------|------|------|------|------|------|------|------|------|------|-------|------|------|------|------|------|------|------|------|------|------|------|----------|--|----|--|---|-------|----|----|----|----|--------|----|----|-----|--------|----|--------|----|----|----|----|--------|----|----|----|----|-----------|--|------|--|------|-------|------|-----|------|-------|------|-----|------|-------|--|-------|-------|-----|-----|-----|-----|-------|-------|------|-------|-------|
| 1                                                                                                                                                                                                                                                                                                                                                                                                                                                                                                                                                                                                                                                                                                                                                                                                                                                                                                                                                                                                                                                                                                                                                                                                                                                                                                                                                                                                                                                                                                                                                                                                                                                                                                                                                                                                                                                                                                                                                                                                                                                                                                                                                                                                                                                                                                                                                                                                                                                                                                                            | 18.45  | 82.1    | 9      | 3/25             | (-) L(I)S(L/D)T(L/D)D/V/R (R) | 1280.8191                       | 0.0080                     | 4.7                         | 20825.4/8.48       | HUMAN   | P87812      | 584885            | Signal peptidase complex catalytic subunit SEC11A - Homo sapiens (Human) |                    |         |         |         |         |         |         |         |         |         |         |          |         |         |         |         |         |         |         |         |         |         |         |         |         |          |                         |      |      |      |      |      |      |      |      |      |      |      |      |      |      |      |      |      |      |      |      |       |      |       |      |      |                       |       |      |       |      |       |       |       |       |       |       |       |       |       |       |       |       |      |       |       |       |       |       |        |       |       |       |       |      |       |      |      |      |      |      |      |      |      |      |      |       |      |      |      |      |      |      |      |      |      |      |      |          |  |    |  |   |       |    |    |    |    |        |    |    |     |        |    |        |    |    |    |    |        |    |    |    |    |           |  |      |  |      |       |      |     |      |       |      |     |      |       |  |       |       |     |     |     |     |       |       |      |       |       |
| <table border="1"> <thead> <tr> <th>Fragment-Ion (m/z)</th> <th>80.044</th> <th>88.088</th> <th>84.085</th> <th>120.082</th> <th>173.127</th> <th>174.084</th> <th>176.121</th> <th>201.123</th> <th>202.086</th> <th>271.110</th> <th>274.188</th> <th>288.123</th> <th>318.148</th> <th>358.187</th> <th>384.188</th> <th>388.208</th> <th>488.228</th> <th>504.244</th> <th>517.237</th> <th>617.327</th> <th>784.388</th> <th>881.380</th> <th>878.418</th> <th>882.481</th> <th>1078.624</th> </tr> </thead> <tbody> <tr> <td>Frag. Inten. (% of TIC)</td> <td>2.04</td> <td>0.42</td> <td>1.85</td> <td>0.05</td> <td>3.41</td> <td>4.48</td> <td>2.66</td> <td>3.12</td> <td>3.41</td> <td>1.63</td> <td>5.99</td> <td>4.51</td> <td>7.17</td> <td>4.04</td> <td>3.92</td> <td>2.76</td> <td>1.35</td> <td>4.75</td> <td>3.67</td> <td>4.45</td> <td>10.42</td> <td>2.08</td> <td>15.26</td> <td>2.25</td> <td>4.25</td> </tr> <tr> <td>Rel. Inten. (% of BP)</td> <td>13.38</td> <td>2.75</td> <td>12.17</td> <td>0.40</td> <td>22.32</td> <td>29.25</td> <td>17.46</td> <td>20.42</td> <td>22.38</td> <td>10.70</td> <td>39.25</td> <td>29.53</td> <td>46.99</td> <td>26.45</td> <td>25.69</td> <td>18.09</td> <td>8.84</td> <td>31.22</td> <td>24.05</td> <td>29.22</td> <td>68.30</td> <td>13.64</td> <td>100.00</td> <td>14.75</td> <td>28.05</td> </tr> <tr> <td>Score</td> <td>-0.13</td> <td>0.22</td> <td>-0.12</td> <td>1.00</td> <td>0.50</td> <td>0.50</td> <td>1.50</td> <td>0.75</td> <td>0.50</td> <td>0.25</td> <td>1.50</td> <td>0.50</td> <td>0.75</td> <td>-0.25</td> <td>0.25</td> <td>1.50</td> <td>0.25</td> <td>1.50</td> <td>0.50</td> <td>1.50</td> <td>1.50</td> <td>0.50</td> <td>1.50</td> <td>1.50</td> <td>1.50</td> </tr> <tr> <td>Ion-type</td> <td></td> <td>LI</td> <td></td> <td>F</td> <td>8L-28</td> <td>81</td> <td>Y1</td> <td>8L</td> <td>81</td> <td>b2+H2O</td> <td>Y2</td> <td>b2</td> <td>8LD</td> <td>b3+H2O</td> <td>Y3</td> <td>b4+H2O</td> <td>Y4</td> <td>Y4</td> <td>Y5</td> <td>Y6</td> <td>Y7-H2O</td> <td>Y7</td> <td>Y8</td> <td>Y9</td> <td>Y9</td> </tr> <tr> <td>Delta ppm</td> <td></td> <td>-0.3</td> <td></td> <td>13.5</td> <td>-15.3</td> <td>-9.2</td> <td>9.4</td> <td>-9.8</td> <td>-21.9</td> <td>-7.3</td> <td>0.5</td> <td>-0.9</td> <td>-16.2</td> <td></td> <td>-20.2</td> <td>-22.1</td> <td>5.8</td> <td>6.2</td> <td>6.5</td> <td>3.2</td> <td>-10.1</td> <td>-23.3</td> <td>-1.8</td> <td>-14.1</td> <td>-11.8</td> </tr> </tbody> </table> |        |         |        |                  |                               |                                 |                            |                             |                    |         |             |                   |                                                                          | Fragment-Ion (m/z) | 80.044  | 88.088  | 84.085  | 120.082 | 173.127 | 174.084 | 176.121 | 201.123 | 202.086 | 271.110 | 274.188  | 288.123 | 318.148 | 358.187 | 384.188 | 388.208 | 488.228 | 504.244 | 517.237 | 617.327 | 784.388 | 881.380 | 878.418 | 882.481 | 1078.624 | Frag. Inten. (% of TIC) | 2.04 | 0.42 | 1.85 | 0.05 | 3.41 | 4.48 | 2.66 | 3.12 | 3.41 | 1.63 | 5.99 | 4.51 | 7.17 | 4.04 | 3.92 | 2.76 | 1.35 | 4.75 | 3.67 | 4.45 | 10.42 | 2.08 | 15.26 | 2.25 | 4.25 | Rel. Inten. (% of BP) | 13.38 | 2.75 | 12.17 | 0.40 | 22.32 | 29.25 | 17.46 | 20.42 | 22.38 | 10.70 | 39.25 | 29.53 | 46.99 | 26.45 | 25.69 | 18.09 | 8.84 | 31.22 | 24.05 | 29.22 | 68.30 | 13.64 | 100.00 | 14.75 | 28.05 | Score | -0.13 | 0.22 | -0.12 | 1.00 | 0.50 | 0.50 | 1.50 | 0.75 | 0.50 | 0.25 | 1.50 | 0.50 | 0.75 | -0.25 | 0.25 | 1.50 | 0.25 | 1.50 | 0.50 | 1.50 | 1.50 | 0.50 | 1.50 | 1.50 | 1.50 | Ion-type |  | LI |  | F | 8L-28 | 81 | Y1 | 8L | 81 | b2+H2O | Y2 | b2 | 8LD | b3+H2O | Y3 | b4+H2O | Y4 | Y4 | Y5 | Y6 | Y7-H2O | Y7 | Y8 | Y9 | Y9 | Delta ppm |  | -0.3 |  | 13.5 | -15.3 | -9.2 | 9.4 | -9.8 | -21.9 | -7.3 | 0.5 | -0.9 | -16.2 |  | -20.2 | -22.1 | 5.8 | 6.2 | 6.5 | 3.2 | -10.1 | -23.3 | -1.8 | -14.1 | -11.8 |
| Fragment-Ion (m/z)                                                                                                                                                                                                                                                                                                                                                                                                                                                                                                                                                                                                                                                                                                                                                                                                                                                                                                                                                                                                                                                                                                                                                                                                                                                                                                                                                                                                                                                                                                                                                                                                                                                                                                                                                                                                                                                                                                                                                                                                                                                                                                                                                                                                                                                                                                                                                                                                                                                                                                           | 80.044 | 88.088  | 84.085 | 120.082          | 173.127                       | 174.084                         | 176.121                    | 201.123                     | 202.086            | 271.110 | 274.188     | 288.123           | 318.148                                                                  | 358.187            | 384.188 | 388.208 | 488.228 | 504.244 | 517.237 | 617.327 | 784.388 | 881.380 | 878.418 | 882.481 | 1078.624 |         |         |         |         |         |         |         |         |         |         |         |         |         |          |                         |      |      |      |      |      |      |      |      |      |      |      |      |      |      |      |      |      |      |      |      |       |      |       |      |      |                       |       |      |       |      |       |       |       |       |       |       |       |       |       |       |       |       |      |       |       |       |       |       |        |       |       |       |       |      |       |      |      |      |      |      |      |      |      |      |      |       |      |      |      |      |      |      |      |      |      |      |      |          |  |    |  |   |       |    |    |    |    |        |    |    |     |        |    |        |    |    |    |    |        |    |    |    |    |           |  |      |  |      |       |      |     |      |       |      |     |      |       |  |       |       |     |     |     |     |       |       |      |       |       |
| Frag. Inten. (% of TIC)                                                                                                                                                                                                                                                                                                                                                                                                                                                                                                                                                                                                                                                                                                                                                                                                                                                                                                                                                                                                                                                                                                                                                                                                                                                                                                                                                                                                                                                                                                                                                                                                                                                                                                                                                                                                                                                                                                                                                                                                                                                                                                                                                                                                                                                                                                                                                                                                                                                                                                      | 2.04   | 0.42    | 1.85   | 0.05             | 3.41                          | 4.48                            | 2.66                       | 3.12                        | 3.41               | 1.63    | 5.99        | 4.51              | 7.17                                                                     | 4.04               | 3.92    | 2.76    | 1.35    | 4.75    | 3.67    | 4.45    | 10.42   | 2.08    | 15.26   | 2.25    | 4.25     |         |         |         |         |         |         |         |         |         |         |         |         |         |          |                         |      |      |      |      |      |      |      |      |      |      |      |      |      |      |      |      |      |      |      |      |       |      |       |      |      |                       |       |      |       |      |       |       |       |       |       |       |       |       |       |       |       |       |      |       |       |       |       |       |        |       |       |       |       |      |       |      |      |      |      |      |      |      |      |      |      |       |      |      |      |      |      |      |      |      |      |      |      |          |  |    |  |   |       |    |    |    |    |        |    |    |     |        |    |        |    |    |    |    |        |    |    |    |    |           |  |      |  |      |       |      |     |      |       |      |     |      |       |  |       |       |     |     |     |     |       |       |      |       |       |
| Rel. Inten. (% of BP)                                                                                                                                                                                                                                                                                                                                                                                                                                                                                                                                                                                                                                                                                                                                                                                                                                                                                                                                                                                                                                                                                                                                                                                                                                                                                                                                                                                                                                                                                                                                                                                                                                                                                                                                                                                                                                                                                                                                                                                                                                                                                                                                                                                                                                                                                                                                                                                                                                                                                                        | 13.38  | 2.75    | 12.17  | 0.40             | 22.32                         | 29.25                           | 17.46                      | 20.42                       | 22.38              | 10.70   | 39.25       | 29.53             | 46.99                                                                    | 26.45              | 25.69   | 18.09   | 8.84    | 31.22   | 24.05   | 29.22   | 68.30   | 13.64   | 100.00  | 14.75   | 28.05    |         |         |         |         |         |         |         |         |         |         |         |         |         |          |                         |      |      |      |      |      |      |      |      |      |      |      |      |      |      |      |      |      |      |      |      |       |      |       |      |      |                       |       |      |       |      |       |       |       |       |       |       |       |       |       |       |       |       |      |       |       |       |       |       |        |       |       |       |       |      |       |      |      |      |      |      |      |      |      |      |      |       |      |      |      |      |      |      |      |      |      |      |      |          |  |    |  |   |       |    |    |    |    |        |    |    |     |        |    |        |    |    |    |    |        |    |    |    |    |           |  |      |  |      |       |      |     |      |       |      |     |      |       |  |       |       |     |     |     |     |       |       |      |       |       |
| Score                                                                                                                                                                                                                                                                                                                                                                                                                                                                                                                                                                                                                                                                                                                                                                                                                                                                                                                                                                                                                                                                                                                                                                                                                                                                                                                                                                                                                                                                                                                                                                                                                                                                                                                                                                                                                                                                                                                                                                                                                                                                                                                                                                                                                                                                                                                                                                                                                                                                                                                        | -0.13  | 0.22    | -0.12  | 1.00             | 0.50                          | 0.50                            | 1.50                       | 0.75                        | 0.50               | 0.25    | 1.50        | 0.50              | 0.75                                                                     | -0.25              | 0.25    | 1.50    | 0.25    | 1.50    | 0.50    | 1.50    | 1.50    | 0.50    | 1.50    | 1.50    | 1.50     |         |         |         |         |         |         |         |         |         |         |         |         |         |          |                         |      |      |      |      |      |      |      |      |      |      |      |      |      |      |      |      |      |      |      |      |       |      |       |      |      |                       |       |      |       |      |       |       |       |       |       |       |       |       |       |       |       |       |      |       |       |       |       |       |        |       |       |       |       |      |       |      |      |      |      |      |      |      |      |      |      |       |      |      |      |      |      |      |      |      |      |      |      |          |  |    |  |   |       |    |    |    |    |        |    |    |     |        |    |        |    |    |    |    |        |    |    |    |    |           |  |      |  |      |       |      |     |      |       |      |     |      |       |  |       |       |     |     |     |     |       |       |      |       |       |
| Ion-type                                                                                                                                                                                                                                                                                                                                                                                                                                                                                                                                                                                                                                                                                                                                                                                                                                                                                                                                                                                                                                                                                                                                                                                                                                                                                                                                                                                                                                                                                                                                                                                                                                                                                                                                                                                                                                                                                                                                                                                                                                                                                                                                                                                                                                                                                                                                                                                                                                                                                                                     |        | LI      |        | F                | 8L-28                         | 81                              | Y1                         | 8L                          | 81                 | b2+H2O  | Y2          | b2                | 8LD                                                                      | b3+H2O             | Y3      | b4+H2O  | Y4      | Y4      | Y5      | Y6      | Y7-H2O  | Y7      | Y8      | Y9      | Y9       |         |         |         |         |         |         |         |         |         |         |         |         |         |          |                         |      |      |      |      |      |      |      |      |      |      |      |      |      |      |      |      |      |      |      |      |       |      |       |      |      |                       |       |      |       |      |       |       |       |       |       |       |       |       |       |       |       |       |      |       |       |       |       |       |        |       |       |       |       |      |       |      |      |      |      |      |      |      |      |      |      |       |      |      |      |      |      |      |      |      |      |      |      |          |  |    |  |   |       |    |    |    |    |        |    |    |     |        |    |        |    |    |    |    |        |    |    |    |    |           |  |      |  |      |       |      |     |      |       |      |     |      |       |  |       |       |     |     |     |     |       |       |      |       |       |
| Delta ppm                                                                                                                                                                                                                                                                                                                                                                                                                                                                                                                                                                                                                                                                                                                                                                                                                                                                                                                                                                                                                                                                                                                                                                                                                                                                                                                                                                                                                                                                                                                                                                                                                                                                                                                                                                                                                                                                                                                                                                                                                                                                                                                                                                                                                                                                                                                                                                                                                                                                                                                    |        | -0.3    |        | 13.5             | -15.3                         | -9.2                            | 9.4                        | -9.8                        | -21.9              | -7.3    | 0.5         | -0.9              | -16.2                                                                    |                    | -20.2   | -22.1   | 5.8     | 6.2     | 6.5     | 3.2     | -10.1   | -23.3   | -1.8    | -14.1   | -11.8    |         |         |         |         |         |         |         |         |         |         |         |         |         |          |                         |      |      |      |      |      |      |      |      |      |      |      |      |      |      |      |      |      |      |      |      |       |      |       |      |      |                       |       |      |       |      |       |       |       |       |       |       |       |       |       |       |       |       |      |       |       |       |       |       |        |       |       |       |       |      |       |      |      |      |      |      |      |      |      |      |      |       |      |      |      |      |      |      |      |      |      |      |      |          |  |    |  |   |       |    |    |    |    |        |    |    |     |        |    |        |    |    |    |    |        |    |    |    |    |           |  |      |  |      |       |      |     |      |       |      |     |      |       |  |       |       |     |     |     |     |       |       |      |       |       |

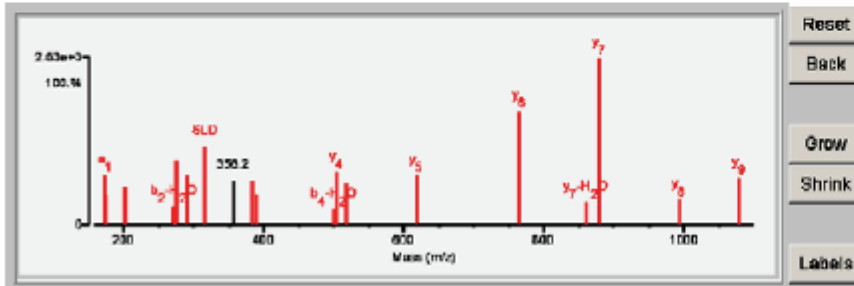

# N56

## Detailed Results

| Rank                                                                                                                                                                                                                                                                                                                                                                                                                                                                                                                                                                                                                                                                                                                                                                                                                                                                                                                                                                                                                                                                                                                                                                                                                                                                                                                                                                                                                                                                                                                                                                                                                                                                                                                                                                                                                                                                                                                                                                                                                                                                                                                                                                                                                                                                                                                                                                                                                                                                                                                                                                                                                                    | Score  | SP1 (%) | BC8     | # Unmatched Ions | Sequence                             | MH <sup>+</sup> Calculated (Da) | MH <sup>+</sup> Error (Da) | MH <sup>+</sup> Error (ppm) | Protein MW/pI (Da) | Species | Accession # | MS-Digest Index # | Protein Name                                                      |                    |                       |         |         |         |                       |                   |          |          |          |          |          |         |         |         |                       |         |         |         |                       |          |          |          |          |          |          |                         |      |      |      |      |      |       |      |      |      |      |      |      |      |      |      |      |      |      |      |      |      |      |      |      |      |                       |      |      |       |       |       |        |       |       |       |       |       |       |       |       |       |       |       |       |       |       |       |       |       |       |       |       |      |      |      |      |      |      |      |      |      |      |      |      |      |      |      |      |      |      |      |      |      |      |      |      |      |          |   |    |    |    |    |    |     |    |    |    |    |        |    |    |                       |    |        |    |                   |    |    |    |    |    |     |           |      |     |     |      |      |      |       |       |     |      |      |      |      |     |                       |       |      |      |       |                   |      |      |       |      |      |      |
|-----------------------------------------------------------------------------------------------------------------------------------------------------------------------------------------------------------------------------------------------------------------------------------------------------------------------------------------------------------------------------------------------------------------------------------------------------------------------------------------------------------------------------------------------------------------------------------------------------------------------------------------------------------------------------------------------------------------------------------------------------------------------------------------------------------------------------------------------------------------------------------------------------------------------------------------------------------------------------------------------------------------------------------------------------------------------------------------------------------------------------------------------------------------------------------------------------------------------------------------------------------------------------------------------------------------------------------------------------------------------------------------------------------------------------------------------------------------------------------------------------------------------------------------------------------------------------------------------------------------------------------------------------------------------------------------------------------------------------------------------------------------------------------------------------------------------------------------------------------------------------------------------------------------------------------------------------------------------------------------------------------------------------------------------------------------------------------------------------------------------------------------------------------------------------------------------------------------------------------------------------------------------------------------------------------------------------------------------------------------------------------------------------------------------------------------------------------------------------------------------------------------------------------------------------------------------------------------------------------------------------------------|--------|---------|---------|------------------|--------------------------------------|---------------------------------|----------------------------|-----------------------------|--------------------|---------|-------------|-------------------|-------------------------------------------------------------------|--------------------|-----------------------|---------|---------|---------|-----------------------|-------------------|----------|----------|----------|----------|----------|---------|---------|---------|-----------------------|---------|---------|---------|-----------------------|----------|----------|----------|----------|----------|----------|-------------------------|------|------|------|------|------|-------|------|------|------|------|------|------|------|------|------|------|------|------|------|------|------|------|------|------|------|-----------------------|------|------|-------|-------|-------|--------|-------|-------|-------|-------|-------|-------|-------|-------|-------|-------|-------|-------|-------|-------|-------|-------|-------|-------|-------|-------|------|------|------|------|------|------|------|------|------|------|------|------|------|------|------|------|------|------|------|------|------|------|------|------|------|----------|---|----|----|----|----|----|-----|----|----|----|----|--------|----|----|-----------------------|----|--------|----|-------------------|----|----|----|----|----|-----|-----------|------|-----|-----|------|------|------|-------|-------|-----|------|------|------|------|-----|-----------------------|-------|------|------|-------|-------------------|------|------|-------|------|------|------|
| 1                                                                                                                                                                                                                                                                                                                                                                                                                                                                                                                                                                                                                                                                                                                                                                                                                                                                                                                                                                                                                                                                                                                                                                                                                                                                                                                                                                                                                                                                                                                                                                                                                                                                                                                                                                                                                                                                                                                                                                                                                                                                                                                                                                                                                                                                                                                                                                                                                                                                                                                                                                                                                                       | 24.47  | 100.0   | 12      | 0/26             | (-) V/L(L)E(S)E(Q) F(L)T/R/L/T/R (L) | 1785.9041                       | -0.0031                    | -1.8                        | 14670.0/10.06      | HUMAN   | P37108      | 806887            | Signal recognition particle 14 kDa protein - Homo sapiens (Human) |                    |                       |         |         |         |                       |                   |          |          |          |          |          |         |         |         |                       |         |         |         |                       |          |          |          |          |          |          |                         |      |      |      |      |      |       |      |      |      |      |      |      |      |      |      |      |      |      |      |      |      |      |      |      |      |                       |      |      |       |       |       |        |       |       |       |       |       |       |       |       |       |       |       |       |       |       |       |       |       |       |       |       |      |      |      |      |      |      |      |      |      |      |      |      |      |      |      |      |      |      |      |      |      |      |      |      |      |          |   |    |    |    |    |    |     |    |    |    |    |        |    |    |                       |    |        |    |                   |    |    |    |    |    |     |           |      |     |     |      |      |      |       |       |     |      |      |      |      |     |                       |       |      |      |       |                   |      |      |       |      |      |      |
| <table border="1"> <thead> <tr> <th>Fragment-Ion (m/z)</th> <th>72.082</th> <th>88.087</th> <th>176.118</th> <th>243.134</th> <th>278.188</th> <th>301.168</th> <th>368.214</th> <th>388.248</th> <th>414.243</th> <th>518.292</th> <th>643.284</th> <th>812.308</th> <th>818.337</th> <th>830.324</th> <th>724.983<sup>+2</sup></th> <th>732.424</th> <th>741.345</th> <th>768.348</th> <th>788.808<sup>+2</sup></th> <th>1007.542</th> <th>1094.484</th> <th>1108.681</th> <th>1147.671</th> <th>1223.820</th> <th>1362.887</th> </tr> </thead> <tbody> <tr> <td>Frag. Inten. (% of TIC)</td> <td>0.06</td> <td>0.31</td> <td>2.80</td> <td>1.97</td> <td>5.23</td> <td>13.18</td> <td>2.17</td> <td>5.07</td> <td>8.39</td> <td>4.50</td> <td>5.82</td> <td>1.56</td> <td>7.23</td> <td>2.05</td> <td>1.57</td> <td>5.78</td> <td>3.12</td> <td>1.48</td> <td>1.65</td> <td>3.91</td> <td>5.80</td> <td>2.58</td> <td>1.82</td> <td>6.97</td> <td>4.95</td> </tr> <tr> <td>Rel. Inten. (% of BP)</td> <td>0.46</td> <td>2.37</td> <td>21.24</td> <td>14.93</td> <td>39.66</td> <td>100.00</td> <td>16.47</td> <td>39.44</td> <td>63.65</td> <td>34.13</td> <td>44.11</td> <td>11.87</td> <td>54.87</td> <td>15.58</td> <td>11.92</td> <td>43.85</td> <td>23.63</td> <td>11.31</td> <td>12.54</td> <td>29.65</td> <td>43.99</td> <td>19.56</td> <td>13.80</td> <td>52.87</td> <td>37.55</td> </tr> <tr> <td>Score</td> <td>0.50</td> <td>0.22</td> <td>1.50</td> <td>0.75</td> <td>1.50</td> <td>0.50</td> <td>0.75</td> <td>1.50</td> <td>0.50</td> <td>1.50</td> <td>0.50</td> <td>1.50</td> <td>1.50</td> <td>0.50</td> <td>0.50</td> <td>1.50</td> <td>0.25</td> <td>0.50</td> <td>1.50</td> <td>1.50</td> <td>0.50</td> <td>1.50</td> <td>0.50</td> <td>1.50</td> <td>1.50</td> </tr> <tr> <td>Ion-type</td> <td>V</td> <td>LI</td> <td>Y1</td> <td>EL</td> <td>Y2</td> <td>b2</td> <td>LLE</td> <td>Y3</td> <td>b3</td> <td>Y4</td> <td>b4</td> <td>b5-H2O</td> <td>Y5</td> <td>b5</td> <td>Y12+H2O<sup>+2</sup></td> <td>Y6</td> <td>b6-H2O</td> <td>b6</td> <td>Y13<sup>+2</sup></td> <td>Y7</td> <td>b7</td> <td>Y8</td> <td>b8</td> <td>Y9</td> <td>Y10</td> </tr> <tr> <td>Delta ppm</td> <td>14.2</td> <td>0.9</td> <td>2.0</td> <td>-5.5</td> <td>-3.0</td> <td>-0.5</td> <td>-14.6</td> <td>-11.8</td> <td>0.2</td> <td>-2.3</td> <td>-2.8</td> <td>-1.4</td> <td>-6.2</td> <td>9.3</td> <td>Y12+H2O<sup>+2</sup></td> <td>-16.6</td> <td>-0.7</td> <td>-6.1</td> <td>-15.3</td> <td>Y13<sup>+2</sup></td> <td>-9.5</td> <td>-3.2</td> <td>-12.1</td> <td>-0.7</td> <td>-5.3</td> <td>-1.4</td> </tr> </tbody> </table> |        |         |         |                  |                                      |                                 |                            |                             |                    |         |             |                   |                                                                   | Fragment-Ion (m/z) | 72.082                | 88.087  | 176.118 | 243.134 | 278.188               | 301.168           | 368.214  | 388.248  | 414.243  | 518.292  | 643.284  | 812.308 | 818.337 | 830.324 | 724.983 <sup>+2</sup> | 732.424 | 741.345 | 768.348 | 788.808 <sup>+2</sup> | 1007.542 | 1094.484 | 1108.681 | 1147.671 | 1223.820 | 1362.887 | Frag. Inten. (% of TIC) | 0.06 | 0.31 | 2.80 | 1.97 | 5.23 | 13.18 | 2.17 | 5.07 | 8.39 | 4.50 | 5.82 | 1.56 | 7.23 | 2.05 | 1.57 | 5.78 | 3.12 | 1.48 | 1.65 | 3.91 | 5.80 | 2.58 | 1.82 | 6.97 | 4.95 | Rel. Inten. (% of BP) | 0.46 | 2.37 | 21.24 | 14.93 | 39.66 | 100.00 | 16.47 | 39.44 | 63.65 | 34.13 | 44.11 | 11.87 | 54.87 | 15.58 | 11.92 | 43.85 | 23.63 | 11.31 | 12.54 | 29.65 | 43.99 | 19.56 | 13.80 | 52.87 | 37.55 | Score | 0.50 | 0.22 | 1.50 | 0.75 | 1.50 | 0.50 | 0.75 | 1.50 | 0.50 | 1.50 | 0.50 | 1.50 | 1.50 | 0.50 | 0.50 | 1.50 | 0.25 | 0.50 | 1.50 | 1.50 | 0.50 | 1.50 | 0.50 | 1.50 | 1.50 | Ion-type | V | LI | Y1 | EL | Y2 | b2 | LLE | Y3 | b3 | Y4 | b4 | b5-H2O | Y5 | b5 | Y12+H2O <sup>+2</sup> | Y6 | b6-H2O | b6 | Y13 <sup>+2</sup> | Y7 | b7 | Y8 | b8 | Y9 | Y10 | Delta ppm | 14.2 | 0.9 | 2.0 | -5.5 | -3.0 | -0.5 | -14.6 | -11.8 | 0.2 | -2.3 | -2.8 | -1.4 | -6.2 | 9.3 | Y12+H2O <sup>+2</sup> | -16.6 | -0.7 | -6.1 | -15.3 | Y13 <sup>+2</sup> | -9.5 | -3.2 | -12.1 | -0.7 | -5.3 | -1.4 |
| Fragment-Ion (m/z)                                                                                                                                                                                                                                                                                                                                                                                                                                                                                                                                                                                                                                                                                                                                                                                                                                                                                                                                                                                                                                                                                                                                                                                                                                                                                                                                                                                                                                                                                                                                                                                                                                                                                                                                                                                                                                                                                                                                                                                                                                                                                                                                                                                                                                                                                                                                                                                                                                                                                                                                                                                                                      | 72.082 | 88.087  | 176.118 | 243.134          | 278.188                              | 301.168                         | 368.214                    | 388.248                     | 414.243            | 518.292 | 643.284     | 812.308           | 818.337                                                           | 830.324            | 724.983 <sup>+2</sup> | 732.424 | 741.345 | 768.348 | 788.808 <sup>+2</sup> | 1007.542          | 1094.484 | 1108.681 | 1147.671 | 1223.820 | 1362.887 |         |         |         |                       |         |         |         |                       |          |          |          |          |          |          |                         |      |      |      |      |      |       |      |      |      |      |      |      |      |      |      |      |      |      |      |      |      |      |      |      |      |                       |      |      |       |       |       |        |       |       |       |       |       |       |       |       |       |       |       |       |       |       |       |       |       |       |       |       |      |      |      |      |      |      |      |      |      |      |      |      |      |      |      |      |      |      |      |      |      |      |      |      |      |          |   |    |    |    |    |    |     |    |    |    |    |        |    |    |                       |    |        |    |                   |    |    |    |    |    |     |           |      |     |     |      |      |      |       |       |     |      |      |      |      |     |                       |       |      |      |       |                   |      |      |       |      |      |      |
| Frag. Inten. (% of TIC)                                                                                                                                                                                                                                                                                                                                                                                                                                                                                                                                                                                                                                                                                                                                                                                                                                                                                                                                                                                                                                                                                                                                                                                                                                                                                                                                                                                                                                                                                                                                                                                                                                                                                                                                                                                                                                                                                                                                                                                                                                                                                                                                                                                                                                                                                                                                                                                                                                                                                                                                                                                                                 | 0.06   | 0.31    | 2.80    | 1.97             | 5.23                                 | 13.18                           | 2.17                       | 5.07                        | 8.39               | 4.50    | 5.82        | 1.56              | 7.23                                                              | 2.05               | 1.57                  | 5.78    | 3.12    | 1.48    | 1.65                  | 3.91              | 5.80     | 2.58     | 1.82     | 6.97     | 4.95     |         |         |         |                       |         |         |         |                       |          |          |          |          |          |          |                         |      |      |      |      |      |       |      |      |      |      |      |      |      |      |      |      |      |      |      |      |      |      |      |      |      |                       |      |      |       |       |       |        |       |       |       |       |       |       |       |       |       |       |       |       |       |       |       |       |       |       |       |       |      |      |      |      |      |      |      |      |      |      |      |      |      |      |      |      |      |      |      |      |      |      |      |      |      |          |   |    |    |    |    |    |     |    |    |    |    |        |    |    |                       |    |        |    |                   |    |    |    |    |    |     |           |      |     |     |      |      |      |       |       |     |      |      |      |      |     |                       |       |      |      |       |                   |      |      |       |      |      |      |
| Rel. Inten. (% of BP)                                                                                                                                                                                                                                                                                                                                                                                                                                                                                                                                                                                                                                                                                                                                                                                                                                                                                                                                                                                                                                                                                                                                                                                                                                                                                                                                                                                                                                                                                                                                                                                                                                                                                                                                                                                                                                                                                                                                                                                                                                                                                                                                                                                                                                                                                                                                                                                                                                                                                                                                                                                                                   | 0.46   | 2.37    | 21.24   | 14.93            | 39.66                                | 100.00                          | 16.47                      | 39.44                       | 63.65              | 34.13   | 44.11       | 11.87             | 54.87                                                             | 15.58              | 11.92                 | 43.85   | 23.63   | 11.31   | 12.54                 | 29.65             | 43.99    | 19.56    | 13.80    | 52.87    | 37.55    |         |         |         |                       |         |         |         |                       |          |          |          |          |          |          |                         |      |      |      |      |      |       |      |      |      |      |      |      |      |      |      |      |      |      |      |      |      |      |      |      |      |                       |      |      |       |       |       |        |       |       |       |       |       |       |       |       |       |       |       |       |       |       |       |       |       |       |       |       |      |      |      |      |      |      |      |      |      |      |      |      |      |      |      |      |      |      |      |      |      |      |      |      |      |          |   |    |    |    |    |    |     |    |    |    |    |        |    |    |                       |    |        |    |                   |    |    |    |    |    |     |           |      |     |     |      |      |      |       |       |     |      |      |      |      |     |                       |       |      |      |       |                   |      |      |       |      |      |      |
| Score                                                                                                                                                                                                                                                                                                                                                                                                                                                                                                                                                                                                                                                                                                                                                                                                                                                                                                                                                                                                                                                                                                                                                                                                                                                                                                                                                                                                                                                                                                                                                                                                                                                                                                                                                                                                                                                                                                                                                                                                                                                                                                                                                                                                                                                                                                                                                                                                                                                                                                                                                                                                                                   | 0.50   | 0.22    | 1.50    | 0.75             | 1.50                                 | 0.50                            | 0.75                       | 1.50                        | 0.50               | 1.50    | 0.50        | 1.50              | 1.50                                                              | 0.50               | 0.50                  | 1.50    | 0.25    | 0.50    | 1.50                  | 1.50              | 0.50     | 1.50     | 0.50     | 1.50     | 1.50     |         |         |         |                       |         |         |         |                       |          |          |          |          |          |          |                         |      |      |      |      |      |       |      |      |      |      |      |      |      |      |      |      |      |      |      |      |      |      |      |      |      |                       |      |      |       |       |       |        |       |       |       |       |       |       |       |       |       |       |       |       |       |       |       |       |       |       |       |       |      |      |      |      |      |      |      |      |      |      |      |      |      |      |      |      |      |      |      |      |      |      |      |      |      |          |   |    |    |    |    |    |     |    |    |    |    |        |    |    |                       |    |        |    |                   |    |    |    |    |    |     |           |      |     |     |      |      |      |       |       |     |      |      |      |      |     |                       |       |      |      |       |                   |      |      |       |      |      |      |
| Ion-type                                                                                                                                                                                                                                                                                                                                                                                                                                                                                                                                                                                                                                                                                                                                                                                                                                                                                                                                                                                                                                                                                                                                                                                                                                                                                                                                                                                                                                                                                                                                                                                                                                                                                                                                                                                                                                                                                                                                                                                                                                                                                                                                                                                                                                                                                                                                                                                                                                                                                                                                                                                                                                | V      | LI      | Y1      | EL               | Y2                                   | b2                              | LLE                        | Y3                          | b3                 | Y4      | b4          | b5-H2O            | Y5                                                                | b5                 | Y12+H2O <sup>+2</sup> | Y6      | b6-H2O  | b6      | Y13 <sup>+2</sup>     | Y7                | b7       | Y8       | b8       | Y9       | Y10      |         |         |         |                       |         |         |         |                       |          |          |          |          |          |          |                         |      |      |      |      |      |       |      |      |      |      |      |      |      |      |      |      |      |      |      |      |      |      |      |      |      |                       |      |      |       |       |       |        |       |       |       |       |       |       |       |       |       |       |       |       |       |       |       |       |       |       |       |       |      |      |      |      |      |      |      |      |      |      |      |      |      |      |      |      |      |      |      |      |      |      |      |      |      |          |   |    |    |    |    |    |     |    |    |    |    |        |    |    |                       |    |        |    |                   |    |    |    |    |    |     |           |      |     |     |      |      |      |       |       |     |      |      |      |      |     |                       |       |      |      |       |                   |      |      |       |      |      |      |
| Delta ppm                                                                                                                                                                                                                                                                                                                                                                                                                                                                                                                                                                                                                                                                                                                                                                                                                                                                                                                                                                                                                                                                                                                                                                                                                                                                                                                                                                                                                                                                                                                                                                                                                                                                                                                                                                                                                                                                                                                                                                                                                                                                                                                                                                                                                                                                                                                                                                                                                                                                                                                                                                                                                               | 14.2   | 0.9     | 2.0     | -5.5             | -3.0                                 | -0.5                            | -14.6                      | -11.8                       | 0.2                | -2.3    | -2.8        | -1.4              | -6.2                                                              | 9.3                | Y12+H2O <sup>+2</sup> | -16.6   | -0.7    | -6.1    | -15.3                 | Y13 <sup>+2</sup> | -9.5     | -3.2     | -12.1    | -0.7     | -5.3     | -1.4    |         |         |                       |         |         |         |                       |          |          |          |          |          |          |                         |      |      |      |      |      |       |      |      |      |      |      |      |      |      |      |      |      |      |      |      |      |      |      |      |      |                       |      |      |       |       |       |        |       |       |       |       |       |       |       |       |       |       |       |       |       |       |       |       |       |       |       |       |      |      |      |      |      |      |      |      |      |      |      |      |      |      |      |      |      |      |      |      |      |      |      |      |      |          |   |    |    |    |    |    |     |    |    |    |    |        |    |    |                       |    |        |    |                   |    |    |    |    |    |     |           |      |     |     |      |      |      |       |       |     |      |      |      |      |     |                       |       |      |      |       |                   |      |      |       |      |      |      |

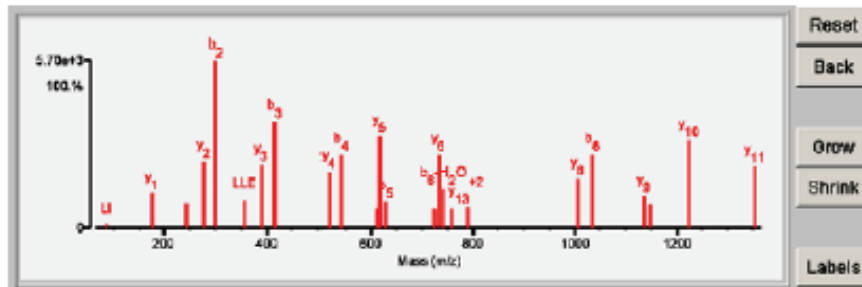



# N59

## Detailed Results

| Rank | Score | SPI (%) | BCS | # Unmatched Ions | Sequence                                                                                                             | MH <sup>+</sup> Calculated (Da) | MH <sup>+</sup> Error (Da) | MH <sup>+</sup> Error (ppm) | Protein MW (Da) | Species | Accession # | MS-Digest Index # | Protein Name                                       |
|------|-------|---------|-----|------------------|----------------------------------------------------------------------------------------------------------------------|---------------------------------|----------------------------|-----------------------------|-----------------|---------|-------------|-------------------|----------------------------------------------------|
| 1    | 18.43 | 87.7    | 12  | 8/26             | (P)A G P P V Q V A V P P P P P V P T E P K Q P T E E E A S S K E D S A P / S K P P V V / G I / I / Y / P P E V R (N) | 6488.8401                       | 0.0237                     | 4.3                         | 88888.8/5.16    | HUMAN   | Q15468      | 593085            | Splicing factor 3 subunit 1 - Homo sapiens (Human) |

  

| Fragment-ion (m/z)      | 70.084 | 86.093 | 218.084 | 326.188 | 382.201 | 385.183 | 413.183 | 488.293 | 541.253 | 586.344 | 598.248 | 812.277 | 894.380 | 711.343 | 716.411 | 857.436 | 894.627 | 970.621 | 1140.821 | 1277.288 | 1295.860 | 1425.183 | 1436.820 | 1603.778 | 1882.978 |
|-------------------------|--------|--------|---------|---------|---------|---------|---------|---------|---------|---------|---------|---------|---------|---------|---------|---------|---------|---------|----------|----------|----------|----------|----------|----------|----------|
| Frac. Inten. (% of TIC) | 0.00   | 0.07   | 2.15    | 2.55    | 2.16    | 2.21    | 4.79    | 1.65    | 1.90    | 4.03    | 2.43    | 25.26   | 16.92   | 5.89    | 2.36    | 3.71    | 1.69    | 2.24    | 4.69     | 1.92     | 1.80     | 2.02     | 3.45     | 2.21     | 1.91     |
| Rel. Inten. (% of BP)   | 0.01   | 0.26   | 8.52    | 10.11   | 6.57    | 8.74    | 18.98   | 6.52    | 7.53    | 15.94   | 9.64    | 100.00  | 66.98   | 23.31   | 9.34    | 14.70   | 6.88    | 8.87    | 18.58    | 7.59     | 7.13     | 8.00     | 13.55    | 8.75     | 7.56     |
| Score                   | 0.20   | 0.22   | -0.09   | 0.75    | 0.75    | 0.50    | 0.50    | 0.75    | 0.50    | 0.75    | 1.50    | 0.50    | 1.50    | 0.50    | -0.09   | 1.50    | -0.07   | 1.50    | 1.50     | -0.08    | 0.50     | -0.08    | 1.50     | -0.09    | 1.50     |
| Ion-type                | FR     | LI     |         | PVQ     | GPVQ    | a4      | b4      | PVVGI   | b5      | PPPPVP  | y+++15  | b6      |         | b7      |         | y7      |         | y8      |          |          | b13      |          | y13      |          | y16      |
| Delta ppm               | -17.5  | -39.8  |         | -0.1    | -21.4   | -22.3   | -8.5    | -21.9   | 15.0    | 5.3     | 423.8   | -8.8    | -12.0   | -10.1   |         | -19.3   |         | -14.7   |          |          | -25.4    |          | -7.4     |          | -25.0    |

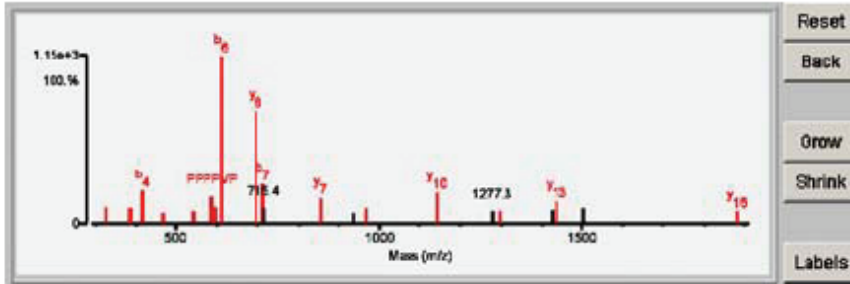

# N60

## Detailed Results

| Rank | Score | SPI (%) | BCS | # Unmatched Ions | Sequence                                      | MH <sup>+</sup> Calculated (Da) | MH <sup>+</sup> Error (Da) | MH <sup>+</sup> Error (ppm) | Protein MW (Da) | Species | Accession # | MS-Digest Index # | Protein Name                                        |
|------|-------|---------|-----|------------------|-----------------------------------------------|---------------------------------|----------------------------|-----------------------------|-----------------|---------|-------------|-------------------|-----------------------------------------------------|
| 1    | 15.62 | 81.9    | 7   | 8/25             | (-) E / L / I / Y / N / L / T / L / Q / R (A) | 1255.6504                       | 0.0034                     | 2.7                         | 135578.1/5.13   | HUMAN   | Q15393      | 593101            | Splicing factor 3B subunit 3 - Homo sapiens (Human) |

  

| Fragment-ion (m/z)      | 72.082 | 86.097 | 88.041 | 102.053 | 120.081 | 136.076 | 175.116 | 201.122 | 208.077 | 249.154 | 303.172 | 349.155 | 416.261 | 454.249 <sup>+2</sup> | 488.288 | 512.217 | 517.306 | 521.941 | 570.299 <sup>+2</sup> | 727.411 | 744.434 | 822.412 | 890.483 | 907.492 | 1020.391 |
|-------------------------|--------|--------|--------|---------|---------|---------|---------|---------|---------|---------|---------|---------|---------|-----------------------|---------|---------|---------|---------|-----------------------|---------|---------|---------|---------|---------|----------|
| Frac. Inten. (% of TIC) | 4.22   | 1.30   | 1.76   | 2.02    | 0.18    | 0.16    | 6.81    | 2.02    | 3.85    | 2.05    | 2.43    | 11.88   | 4.18    | 1.90                  | 2.21    | 3.59    | 11.84   | 1.72    | 2.07                  | 3.03    | 13.33   | 1.80    | 2.37    | 10.26   | 3.23     |
| Rel. Inten. (% of BP)   | 31.68  | 9.75   | 13.22  | 15.19   | 1.32    | 1.22    | 49.61   | 15.19   | 28.88   | 15.39   | 18.24   | 88.95   | 31.37   | 14.23                 | 16.59   | 28.94   | 88.78   | 12.87   | 15.52                 | 22.75   | 100.00  | 13.52   | 17.76   | 78.92   | 24.19    |
| Score                   | -0.32  | 0.22   | -0.13  | -0.15   | 1.00    | 1.00    | 1.50    | -0.15   | 0.50    | -0.15   | 1.50    | 0.50    | 1.50    | 1.50                  | -0.17   | 0.50    | 1.50    | -0.13   | -0.16                 | 0.50    | 1.50    | 0.25    | 0.50    | 1.50    | 1.50     |
| Ion-type                |        | LI     |        |         | F       | Y       | y1      |         | a1      |         | y2      | b2      | y3      | y7 <sup>+2</sup>      |         | b3      | y4      |         |                       | y6-NH3  | y6      | b6-H2O  | y7-NH3  | y7      | y8       |
| Delta ppm               |        | 0.9    |        |         | -2.3    | 0.1     | -16.9   |         | -13.3   |         | -18.6   | -12.7   | -2.4    | -10.7                 |         | -10.3   | -7.3    |         |                       | 1.2     | -2.6    | 31.2    | 11.5    | -8.3    | 7.2      |

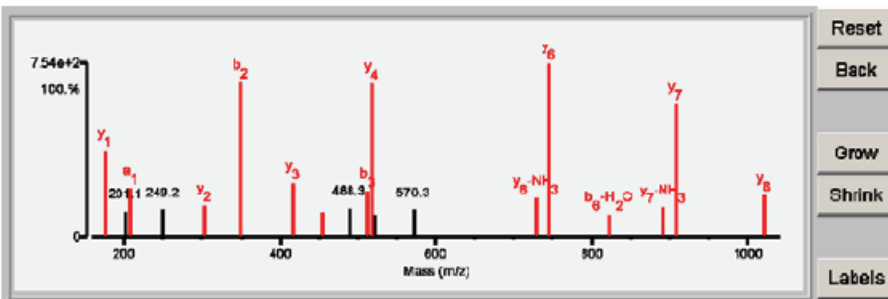

# N61

## Detailed Results

| Rank | Score | SPI (%) | BCS | # Unmatched Ions | Sequence                                  | MH <sup>+</sup> Calculated (Da) | MH <sup>+</sup> Error (Da) | MH <sup>+</sup> Error (ppm) | Protein MWpl (Da) | Species | Accession #            | MS-Digest Index #      | Protein Name                                   |
|------|-------|---------|-----|------------------|-------------------------------------------|---------------------------------|----------------------------|-----------------------------|-------------------|---------|------------------------|------------------------|------------------------------------------------|
| 1    | 26.22 | 100.0   | 14  | 0/25             | (Q) QIR DVLMEIGITIA/E D/F/A/D/Q/F/L/R (V) | 2068.8898                       | 0.0042                     | 2.0                         | 30384.27.84       | HUMAN   | <a href="#">O16280</a> | <a href="#">814211</a> | Surfeit locus protein 4 - Homo sapiens (Human) |

  

| Fragment-ion (m/z)      | 88.067 | 175.119 | 217.068 | 288.188 | 343.160 | 436.287 | 448.132 | 531.216 | 559.217 | 683.324 | 678.366 | 690.268 | 747.251 | 749.398 | 830.308             | 848.319 | 896.455 | 901.341             | 821.831*2 | 1140.529 | 1211.556 | 1312.688 | 1351.808             | 1389.833 | 1500.899 |      |
|-------------------------|--------|---------|---------|---------|---------|---------|---------|---------|---------|---------|---------|---------|---------|---------|---------------------|---------|---------|---------------------|-----------|----------|----------|----------|----------------------|----------|----------|------|
| Frac. Inten. (% of TIC) | 0.04   | 4.15    | 4.69    | 1.55    | 1.92    | 4.13    | 11.78   | 1.29    | 17.00   | 1.68    | 2.93    | 4.30    | 1.41    | 2.14    | 1.99                | 2.32    | 2.32    | 4.07                | 1.33      | 5.21     | 5.63     | 2.15     | 1.66                 | 9.39     | 4.91     |      |
| Rel. Inten. (% of BP)   | 0.22   | 24.41   | 27.57   | 9.20    | 11.30   | 24.28   | 69.29   | 7.58    | 100.00  | 9.85    | 17.22   | 25.28   | 8.29    | 12.59   | 11.70               | 13.64   | 13.61   | 23.96               | 7.81      | 30.65    | 33.10    | 12.62    | 9.78                 | 55.23    | 28.89    |      |
| Score                   | 0.22   | 1.50    | 0.50    | 1.50    | 0.75    | 1.50    | 0.50    | 0.75    | 0.50    | 1.50    | 1.50    | 0.50    | 1.50    | 0.50    | 1.50                | 0.50    | 1.50    | 0.25                | 1.50      | 1.50     | 1.50     | 1.50     | 1.50                 | 1.50     | 1.50     |      |
| Ion-type                | LI     | y1      | b1      | y2      | NDL     | y3      | b3      | y4      | b4      | y5      | b5      | y6      | b6      | y7      | b7-H <sub>2</sub> O | y8      | y7      | b8-H <sub>2</sub> O | y16*2     | y9       | y10      | y11      | y12-H <sub>2</sub> O | y12      | y13      |      |
| Delta ppm               | 12.5   | -1.4    | 2.1     | -17.8   | -5.9    | -9.7    | -7.9    | -17.8   | NDLMO   | -4.2    | -9.8    | -2.9    | -5.0    | -39.8   | -1.8                | -12.7   | -11.3   | -8.7                | -15.6     | 11.5     | -2.7     | -11.6    | -14.4                | -16.1    | -4.1     | 13.2 |

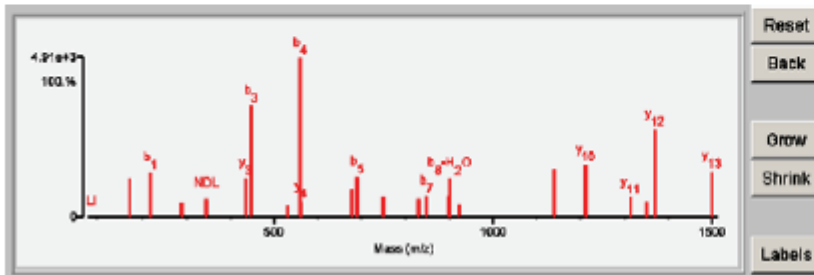

# N62

## Detailed Results

| Rank | Score | SPI (%) | BCS | # Unmatched Ions | Sequence            | MH <sup>+</sup> Calculated (Da) | MH <sup>+</sup> Error (Da) | MH <sup>+</sup> Error (ppm) | Protein MWpl (Da) | Species | Accession #            | MS-Digest Index #      | Protein Name                                             |
|------|-------|---------|-----|------------------|---------------------|---------------------------------|----------------------------|-----------------------------|-------------------|---------|------------------------|------------------------|----------------------------------------------------------|
| 1    | 13.04 | 79.5    | 5   | 6/25             | (P) E N V A E R (S) | 773.3610                        | 0.0023                     | 2.9                         | 57924.67.96       | HUMAN   | <a href="#">P50991</a> | <a href="#">639723</a> | T-complex protein 1 subunit delta - Homo sapiens (Human) |

  

| Fragment-ion (m/z)      | 70.066 | 72.081 | 84.045 | 85.030 | 87.055 | 102.053 | 106.033 | 140.081 | 141.100 | 144.048 | 169.095 | 172.043 | 175.120 | 186.123 | 190.054 | 214.118 | 218.048 | 255.143 | 261.635 | 272.172 | 332.094 | 343.208 | 442.277 | 539.291 | 556.318 |
|-------------------------|--------|--------|--------|--------|--------|---------|---------|---------|---------|---------|---------|---------|---------|---------|---------|---------|---------|---------|---------|---------|---------|---------|---------|---------|---------|
| Frac. Inten. (% of TIC) | 0.01   | 0.19   | 0.12   | 2.99   | 0.21   | 0.08    | 5.11    | 1.79    | 1.73    | 2.16    | 2.14    | 6.71    | 7.91    | 4.52    | 6.64    | 1.85    | 6.03    | 6.22    | 1.71    | 7.54    | 2.27    | 13.76   | 4.85    | 4.37    | 9.29    |
| Rel. Inten. (% of BP)   | 0.04   | 1.38   | 0.88   | 21.74  | 1.54   | 0.80    | 37.17   | 13.00   | 12.55   | 15.71   | 15.55   | 48.78   | 57.47   | 32.85   | 49.28   | 13.44   | 43.80   | 45.19   | 12.48   | 54.82   | 16.46   | 100.00  | 33.77   | 31.79   | 67.52   |
| Score                   | 0.20   | 0.50   | 1.00   | -0.22  | 0.33   | -0.37   | -0.13   | 0.50    | 0.75    | -0.18   | 0.75    | -0.49   | 1.50    | 0.50    | 0.50    | 0.75    | 0.50    | 0.50    | -0.12   | 1.50    | 0.50    | 1.50    | 1.50    | 0.50    | 1.50    |
| Ion-type                | PR     | V      | E      |        | NR     | E       |         | AP-28   | AP      |         | AP      |         | y1      | NV-28   | a1      | NV      | b1      | y2-NH3  |         | y2      | b2      | y3      | y4      | y5-NH3  | y6      |
| Delta ppm               | 5.3    | -1.0   | 7.3    |        | 1.3    |         |         | -21.5   |         | -17.5   |         |         | 3.7     | -11.8   | -3.4    | -8.5    | -3.9    | -10.1   |         | -0.4    | 5.8     | -2.1    | -1.5    | -4.7    | -3.5    |

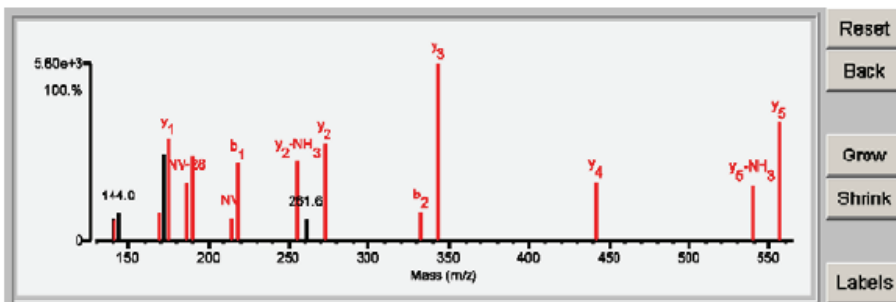

# N63

## Detailed Results

| Rank | Score | SPI (%) | BCS | # Unmatched Ions | Sequence                                | MH <sup>+</sup> Calculated (Da) | MH <sup>+</sup> Error (Da) | MH <sup>+</sup> Error (ppm) | Protein MW/pi (Da) | Species | Accession #            | MS-Digest Index #      | Protein Name                                                              |
|------|-------|---------|-----|------------------|-----------------------------------------|---------------------------------|----------------------------|-----------------------------|--------------------|---------|------------------------|------------------------|---------------------------------------------------------------------------|
| 1    | 20.17 | 86.9    | 11  | 5/25             | (A) V I A P L I A I A I V Y S V P R (L) | 1598.9338                       | 0.0043                     | 2.7                         | 34037.8/8.90       | HUMAN   | <a href="#">Q9Y320</a> | <a href="#">671473</a> | Thioredoxin domain-containing protein 14 precursor - Homo sapiens (Human) |

  

| Fragment-ion (m/z)      | 72.082 | 74.064 | 86.096 | 136.074 | 211.146        | 272.168        | 301.157 | 324.219        | 371.243 | 373.201 <sup>+2</sup> | 395.274        | 458.271        | 469.243        | 583.332        | 614.387 <sup>+2</sup> | 621.331        | 720.393 <sup>+2</sup> | 766.451         | 833.489         | 879.525         | 904.527         | 960.155         | 1017.628        | 1227.736        | 1298.791        |
|-------------------------|--------|--------|--------|---------|----------------|----------------|---------|----------------|---------|-----------------------|----------------|----------------|----------------|----------------|-----------------------|----------------|-----------------------|-----------------|-----------------|-----------------|-----------------|-----------------|-----------------|-----------------|-----------------|
| Frac. Inten. (% of TIC) | 0.09   | 1.65   | 0.52   | 0.05    | 2.33           | 4.77           | 13.39   | 2.08           | 9.04    | 3.70                  | 2.61           | 3.65           | 3.14           | 2.09           | 7.75                  | 2.33           | 3.76                  | 2.38            | 6.37            | 1.65            | 4.74            | 1.80            | 1.81            | 16.39           | 1.81            |
| Rel. Inten. (% of BP)   | 0.56   | 10.09  | 3.16   | 0.33    | 14.21          | 29.10          | 81.74   | 12.67          | 55.18   | 22.59                 | 15.92          | 22.27          | 19.17          | 12.73          | 47.31                 | 14.25          | 22.95                 | 14.55           | 38.89           | 10.08           | 28.90           | 11.61           | 11.02           | 100.00          | 11.02           |
| Score                   | 0.60   | -0.10  | 0.22   | 1.00    | 0.75           | 1.50           | 0.50    | 0.75           | 1.50    | -0.23                 | 0.75           | 1.50           | 0.50           | -0.13          | 1.50                  | 1.50           | -0.23                 | 0.50            | 1.50            | 0.50            | 1.50            | -0.12           | 1.50            | 1.50            | 1.50            |
| Ion-type                | V      | LI     | Y      | PL      | Y <sub>2</sub> | b <sub>2</sub> | PLI     | y <sub>3</sub> | PLIA    | y <sub>4</sub>        | b <sub>4</sub> | y <sub>5</sub> | y <sub>6</sub> | y <sub>7</sub> | y <sub>8</sub>        | y <sub>9</sub> | y <sub>10</sub>       | y <sub>11</sub> | y <sub>12</sub> | y <sub>13</sub> | y <sub>14</sub> | y <sub>15</sub> | y <sub>16</sub> | y <sub>17</sub> | y <sub>18</sub> |
| Delta ppm               | 23.9   |        | -2.6   | -11.0   | 4.3            | -14.0          | -6.8    | -32.3          | 8.8     |                       | 20.5           | -2.7           | -13.9          |                | 17.4                  | -7.4           |                       | -4.4            | 0.9             | -15.3           | 2.2             |                 | 18.6            | -8.2            | 5.7             |

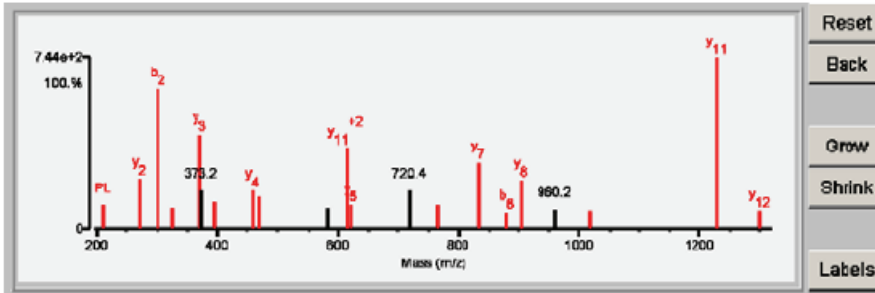

# N64

## Detailed Results

| Rank | Score | SPI (%) | BCS | # Unmatched Ions | Sequence                          | MH <sup>+</sup> Calculated (Da) | MH <sup>+</sup> Error (Da) | MH <sup>+</sup> Error (ppm) | Protein MW/pi (Da) | Species | Accession #            | MS-Digest Index #      | Protein Name                                 |
|------|-------|---------|-----|------------------|-----------------------------------|---------------------------------|----------------------------|-----------------------------|--------------------|---------|------------------------|------------------------|----------------------------------------------|
| 1    | 15.26 | 75.3    | 8   | 9/25             | (S) P T I P P L F S L P E A R (T) | 1412.7242                       | -0.0045                    | -3.2                        | 75666.7/4.92       | HUMAN   | <a href="#">Q96FV9</a> | <a href="#">647051</a> | THO complex subunit 1 - Homo sapiens (Human) |

  

| Fragment-ion (m/z)      | 70.066 | 72.079 | 86.096 | 120.081 | 158.062        | 175.115        | 211.140 | 215.140        | 246.156                          | 269.100        | 287.103        | 338.154        | 356.206        | 472.250        | 513.199        | 532.280        | 563.820 <sup>+2</sup> | 672.373         | 819.431         | 819.520         | 823.902         | 828.366         | 881.482         | 1029.576        | 1126.615        |
|-------------------------|--------|--------|--------|---------|----------------|----------------|---------|----------------|----------------------------------|----------------|----------------|----------------|----------------|----------------|----------------|----------------|-----------------------|-----------------|-----------------|-----------------|-----------------|-----------------|-----------------|-----------------|-----------------|
| Frac. Inten. (% of TIC) | 0.01   | 2.12   | 0.25   | 0.07    | 2.75           | 2.77           | 2.10    | 2.47           | 3.12                             | 1.90           | 2.10           | 3.16           | 2.33           | 2.26           | 3.99           | 2.08           | 37.45                 | 4.95            | 3.15            | 3.04            | 2.39            | 2.40            | 3.16            | 7.12            | 2.85            |
| Rel. Inten. (% of BP)   | 0.04   | 5.55   | 0.66   | 0.17    | 7.35           | 7.40           | 5.60    | 6.59           | 8.34                             | 5.08           | 5.60           | 8.44           | 6.22           | 6.05           | 10.66          | 5.55           | 100.00                | 13.23           | 8.42            | 8.12            | 6.39            | 6.40            | 8.44            | 19.02           | 7.60            |
| Score                   | 0.20   | -0.06  | 0.22   | 1.00    | 0.50           | 1.50           | 0.75    | -0.07          | 1.50                             | 0.25           | 0.50           | -0.08          | -0.06          | 1.50           | -0.11          | -0.06          | 1.50                  | 1.50            | 1.50            | -0.08           | -0.06           | 0.50            | -0.08           | 1.50            | 1.50            |
| Ion-type                | PR     | LI     | LI     | F       | a <sub>1</sub> | y <sub>1</sub> | LP      | y <sub>2</sub> | b <sub>2</sub> -H <sub>2</sub> O | b <sub>2</sub> | y <sub>3</sub> | y <sub>4</sub> | y <sub>5</sub> | y <sub>6</sub> | y <sub>7</sub> | y <sub>8</sub> | y <sub>9</sub>        | y <sub>10</sub> | y <sub>11</sub> | y <sub>12</sub> | y <sub>13</sub> | y <sub>14</sub> | y <sub>15</sub> | y <sub>16</sub> | y <sub>17</sub> |
| Delta ppm               | 5.3    |        | -1.5   | -1.5    | -14.0          | -22.6          | -24.2   |                | -0.7                             | 12.5           | -14.3          |                |                | -2.0           |                |                | 6.6                   | 8.2             | -6.5            |                 |                 | -37.7           |                 | 3.3             | -9.2            |

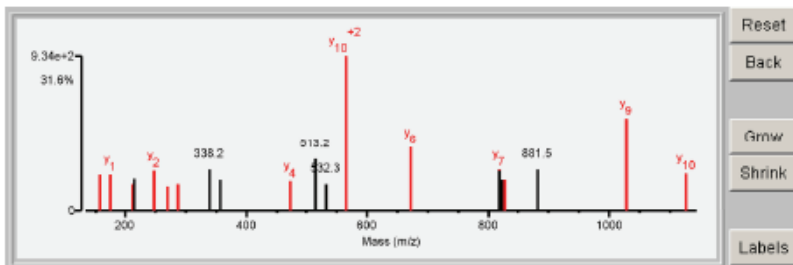



# N65

## Detailed Results

| Rank | Score | SPI (%) | BCS | # Unmatched Ions | Sequence                    | MH <sup>+</sup> Calculated (Da) | MH <sup>+</sup> Error (Da) | MH <sup>+</sup> Error (ppm) | Protein MW (Da) | Species | Accession #      | MS-Digest Index #                           | Protein Name |
|------|-------|---------|-----|------------------|-----------------------------|---------------------------------|----------------------------|-----------------------------|-----------------|---------|------------------|---------------------------------------------|--------------|
| 1    | 19.43 | 96.7    | 7   | 3/25             | (P) V I A G I S E L P R (R) | 916.4667                        | 0.0014                     | 1.8                         | 35716.2/6.61    | HUMAN   | P04818<br>972838 | Thymidylate synthase - Homo sapiens (Human) |              |

  

| Fragment-ion (m/z)      | 70.065 | 72.061 | 88.097 | 129.086 | 160.078 | 161.080 | 176.118 | 188.073 | 189.080 | 265.143 | 269.110 | 272.170 | 282.182 | 301.167 <sup>+2</sup> | 318.131 | 320.873 <sup>+2</sup> | 368.182 <sup>+2</sup> | 385.187 <sup>+2</sup> | 386.263 | 614.298 | 601.328 | 640.338 | 658.348 | 711.376 | 728.385 |
|-------------------------|--------|--------|--------|---------|---------|---------|---------|---------|---------|---------|---------|---------|---------|-----------------------|---------|-----------------------|-----------------------|-----------------------|---------|---------|---------|---------|---------|---------|---------|
| Frac. Inten. (% of TIC) | 0.00   | 0.19   | 0.05   | 1.52    | 17.51   | 1.55    | 1.79    | 8.13    | 1.09    | 2.68    | 2.85    | 4.51    | 1.69    | 1.05                  | 1.94    | 1.90                  | 5.65                  | 1.90                  | 5.87    | 3.86    | 5.04    | 1.27    | 12.25   | 1.72    | 13.89   |
| Rel. Inten. (% of BP)   | 0.01   | 1.09   | 0.27   | 8.65    | 100.00  | 8.79    | 10.15   | 46.20   | 6.19    | 15.21   | 15.20   | 25.62   | 9.63    | 5.95                  | 11.00   | 10.77                 | 32.06                 | 10.77                 | 33.36   | 21.93   | 28.61   | 7.22    | 69.59   | 9.79    | 78.89   |
| Score                   | 0.20   | 0.50   | 0.22   | 0.75    | 0.50    | -0.09   | 1.50    | 0.50    | -0.06   | 0.50    | 0.50    | 1.50    | -0.10   | 1.50                  | 0.50    | 0.50                  | 1.50                  | 1.50                  | 1.50    | 1.50    | 1.50    | 0.50    | 1.50    | 0.50    | 1.50    |
| Ion-type                | PR     | V      | LI     | QIKR    | b1      | y1      | b1      | y1      | b1      | y2-NH3  | b2      | y2      | y2      | y5 <sup>+2</sup>      | b3      | y6+H2O <sup>+2</sup>  | y7+H2O <sup>+2</sup>  | y7 <sup>+2</sup>      | y3      | y4      | y5      | y6+H2O  | y6      | y7+H2O  | y7      |
| Delta ppm               | -0.4   | -1.0   | 2.0    | -7.4    | -13.5   | -15.9   | -5.4    | -8.9    | -7.7    | -5.2    | -6.3    | -5.5    | -8.7    | -2.5                  | -3.5    | -4.2                  | -5.7                  | -4.6                  | -3.2    | -4.5    | -4.8    | -4.9    | -5.3    |         |         |

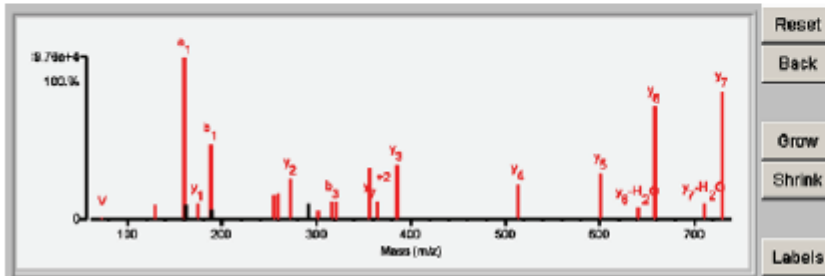

# N66

## Detailed Results

| Rank | Score | SPI (%) | BCS | # Unmatched Ions | Sequence                                            | MH <sup>+</sup> Calculated (Da) | MH <sup>+</sup> Error (Da) | MH <sup>+</sup> Error (ppm) | Protein MW (Da) | Species | Accession #      | MS-Digest Index #                             | Protein Name |
|------|-------|---------|-----|------------------|-----------------------------------------------------|---------------------------------|----------------------------|-----------------------------|-----------------|---------|------------------|-----------------------------------------------|--------------|
| 1    | 19.71 | 84.6    | 11  | 4/25             | (-) Q I L V T E I Q I L D I L I F I P E / C / R (V) | 1687.7931                       | 0.0097                     | 5.7                         | 19661.0/6.31    | HUMAN   | Q9Y3C4<br>656951 | TP53RK-binding protein - Homo sapiens (Human) |              |

  

| Fragment-ion (m/z)      | 70.065 | 72.063 | 86.097 | 110.072 | 175.116 | 217.065 | 278.122 | 330.145 | 504.221 | 568.266           | 629.304 <sup>+2</sup> | 651.299 | 658.355 <sup>+2</sup> | 696.321 | 736.384 <sup>+2</sup> | 740.349 | 764.370 | 872.449 | 879.395 | 924.429 | 992.474 | 1037.516 | 1120.537 | 1184.561 | 1257.600 |
|-------------------------|--------|--------|--------|---------|---------|---------|---------|---------|---------|-------------------|-----------------------|---------|-----------------------|---------|-----------------------|---------|---------|---------|---------|---------|---------|----------|----------|----------|----------|
| Frac. Inten. (% of TIC) | 0.01   | 3.43   | 0.18   | 0.25    | 4.17    | 5.58    | 4.33    | 3.90    | 7.34    | 2.87              | 9.01                  | 4.21    | 4.73                  | 3.37    | 4.77                  | 4.13    | 6.15    | 3.14    | 4.29    | 4.07    | 4.93    | 3.33     | 5.24     | 3.09     | 3.51     |
| Rel. Inten. (% of BP)   | 0.07   | 38.05  | 1.85   | 2.82    | 46.23   | 61.88   | 48.10   | 43.28   | 81.50   | 31.91             | 100.00                | 46.69   | 52.45                 | 37.36   | 52.92                 | 45.88   | 68.30   | 34.88   | 47.64   | 45.12   | 54.66   | 36.91    | 58.15    | 34.27    | 38.91    |
| Score                   | 0.20   | -0.38  | 0.22   | 1.00    | 1.50    | 0.50    | 1.50    | 0.50    | 1.50    | 0.50              | 1.50                  | 1.50    | -0.52                 | 0.50    | 1.50                  | -0.46   | 1.50    | -0.35   | 1.50    | 0.50    | 1.50    | 0.50     | 1.50     | 0.50     | 1.50     |
| Ion-type                | PR     | LI     | H      | y1      | b1      | y2      | b2      | y4      | b4      | y10 <sup>+2</sup> | y5                    | b5      | y12 <sup>+2</sup>     | b6      | y7                    | y8      | b7      | y7      | b7      | y8      | b8      | y9       | b9       | y10      |          |
| Delta ppm               | 2.5    | 10.2   | 6.8    | -16.3   | -2.9    | -20.6   | -12.7   | -5.7    | 17.1    | -2.7              | 10.9                  | 8.7     | 16.9                  | -7.7    | -8.7                  | 4.2     | -13.0   | 6.4     | -7.2    | -14.1   | -3.9    |          |          |          |          |

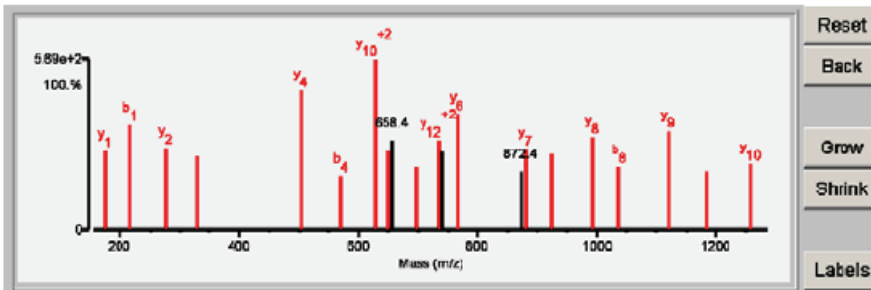



# N67

## Detailed Results

| Rank | Score | SPI (%) | BCS | # Unmatched Ions | Sequence                  | MH <sup>+</sup> Calculated (Da) | MH <sup>+</sup> Error (Da) | MH <sup>+</sup> Error (ppm) | Protein MW/pl (Da) | Species | Accession #            | MS-Digest Index #      | Protein Name                                                          |
|------|-------|---------|-----|------------------|---------------------------|---------------------------------|----------------------------|-----------------------------|--------------------|---------|------------------------|------------------------|-----------------------------------------------------------------------|
| 1    | 12.12 | 71.2    | 5   | 9/25             | (T) V/B/N/L/Y L F D/R (N) | 1264.6143                       | 0.0048                     | 3.8                         | 16831.7/9.22       | HUMAN   | <a href="#">Q9Y5R8</a> | <a href="#">656855</a> | Trafficking protein particle complex subunit 1 - Homo sapiens (Human) |

  

| Fragment-ion (m/z)      | 70.067 | 72.082 | 84.042 | 86.095 | 89.063 | 110.071 | 120.082 | 136.076 | 138.052 | 175.118 | 252.105 | 272.170 | 276.164 | 325.133 | 341.693 <sup>+2</sup> | 382.197 | 417.214 | 439.173 | 504.283 | 539.279 <sup>+2</sup> | 552.259 | 713.363 | 799.463 | 826.449 | 940.485 |
|-------------------------|--------|--------|--------|--------|--------|---------|---------|---------|---------|---------|---------|---------|---------|---------|-----------------------|---------|---------|---------|---------|-----------------------|---------|---------|---------|---------|---------|
| Frac. Inten. (% of TIC) | 0.01   | 0.20   | 4.89   | 0.31   | 2.57   | 0.60    | 0.15    | 0.14    | 2.63    | 10.32   | 3.45    | 2.44    | 2.79    | 8.21    | 2.94                  | 3.31    | 3.62    | 4.53    | 3.75    | 12.53                 | 5.02    | 6.87    | 3.64    | 3.49    | 11.59   |
| Rel. Inten. (% of BP)   | 0.08   | 1.56   | 39.07  | 2.46   | 20.48  | 4.77    | 1.18    | 1.14    | 21.02   | 82.40   | 27.51   | 19.50   | 22.26   | 65.53   | 23.50                 | 26.41   | 28.88   | 36.20   | 29.98   | 100.00                | 40.09   | 54.84   | 29.04   | 27.89   | 82.55   |
| Score                   | 0.20   | 0.50   | -0.39  | 0.22   | -0.20  | 1.00    | 1.00    | 1.00    | -0.21   | 1.50    | 0.75    | -0.20   | -0.22   | 0.50    | -0.24                 | -0.26   | -0.29   | 0.50    | 0.75    | 1.50                  | 0.50    | 1.50    | -0.29   | 1.50    | 1.50    |
| Ion-type                | PR     | V      |        | LI     |        | H       | F       | Y       |         | y1      | HN      |         |         | b2      |                       |         |         | b3      | NLYL    | y8 <sup>+2</sup>      | b4      | y5      |         | y6      | y7      |
| Delta ppm               | 29.6   | 11.4   |        | -18.6  |        | 1.1     | 9.4     | 5.2     |         | -7.1    | -19.5   |         |         | -4.3    |                       |         |         | -9.6    | 0.5     | 3.1                   | -3.2    | 2.0     |         | 4.3     | -4.0    |

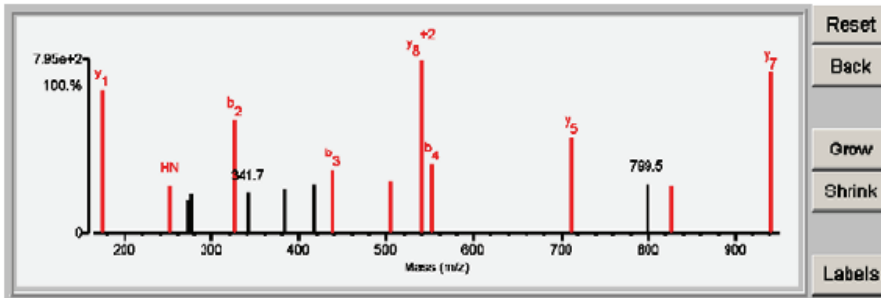

# N68

## Detailed Results

| Rank | Score | SPI (%) | BCS | # Unmatched Ions | Sequence                          | MH <sup>+</sup> Calculated (Da) | MH <sup>+</sup> Error (Da) | MH <sup>+</sup> Error (ppm) | Protein MW/pl (Da) | Species | Accession #            | MS-Digest Index #      | Protein Name                               |
|------|-------|---------|-----|------------------|-----------------------------------|---------------------------------|----------------------------|-----------------------------|--------------------|---------|------------------------|------------------------|--------------------------------------------|
| 1    | 16.30 | 51.2    | 9   | 8/25             | (-) K/L/L T/B/N/L/L/S/S E V/R (G) | 1740.9036                       | 0.0065                     | 3.7                         | 14199.5/5.21       | HUMAN   | <a href="#">Q9UI30</a> | <a href="#">657277</a> | TRM112-like protein - Homo sapiens (Human) |

  

| Fragment-ion (m/z)      | 70.066 | 72.083 | 84.081 | 86.097 | 94.066 | 110.072 | 116.058 | 120.082 | 175.119 | 239.117 | 252.113 | 259.056 | 352.110 | 372.143 | 498.273          | 531.792 <sup>+2</sup> | 549.956 <sup>+3</sup> | 585.308 | 638.862 <sup>+2</sup> | 695.395 <sup>+2</sup> | 698.389 | 811.489 | 824.429 <sup>+2</sup> | 925.523 | 1062.576 |
|-------------------------|--------|--------|--------|--------|--------|---------|---------|---------|---------|---------|---------|---------|---------|---------|------------------|-----------------------|-----------------------|---------|-----------------------|-----------------------|---------|---------|-----------------------|---------|----------|
| Frac. Inten. (% of TIC) | 0.00   | 0.07   | 3.28   | 0.77   | 18.61  | 0.27    | 2.47    | 2.73    | 4.17    | 2.19    | 2.12    | 2.22    | 2.75    | 2.49    | 2.13             | 5.25                  | 7.72                  | 7.43    | 3.80                  | 4.57                  | 4.82    | 2.92    | 9.25                  | 5.72    | 2.25     |
| Rel. Inten. (% of BP)   | 0.02   | 0.37   | 17.82  | 4.14   | 100.00 | 1.47    | 13.27   | 14.64   | 22.42   | 11.76   | 11.40   | 11.95   | 14.78   | 13.36   | 11.47            | 28.20                 | 41.47                 | 39.91   | 20.43                 | 24.54                 | 25.87   | 15.88   | 49.71                 | 30.72   | 12.09    |
| Score                   | 0.20   | 0.50   | -0.18  | 0.22   | -1.00  | 1.00    | -0.13   | -0.15   | 1.50    | 0.75    | 0.75    | -0.12   | 0.50    | -0.13   | 1.50             | 1.50                  | -0.41                 | 1.50    | 1.50                  | 1.50                  | 1.50    | -0.50   | 1.50                  | 1.50    | 1.50     |
| Ion-type                | PR     | V      |        | LI     |        | H       |         | TH      | HN      |         | HN      |         | b1      | y4      | y9 <sup>+2</sup> |                       |                       | y5      | y11 <sup>+2</sup>     | y12 <sup>+2</sup>     | y6      | y7      | y8                    | y9      |          |
| Delta ppm               | 18.2   | 28.1   |        | 11.3   |        | 2.1     |         |         | -2.0    | 6.8     | 11.8    |         | -17.0   |         | -9.8             |                       |                       | -3.8    | 3.4                   | -9.9                  | -8.2    | 12.9    |                       | -4.0    |          |

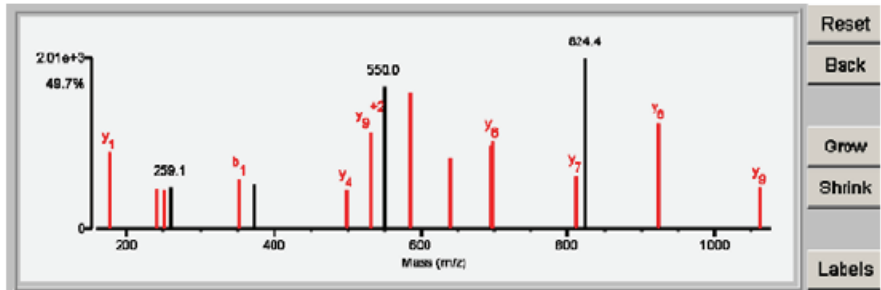

# N69

## Detailed Results

| Rank                    | Score   | SPI (%) | BCS     | # Unmatched Ions | Sequence                                                                 | MH <sup>+</sup> Calculated (Da)  | MH <sup>+</sup> Error (Da) | MH <sup>+</sup> Error (ppm) | Protein MW/Pl (Da)               | Species | Accession #   | MS-Digest Index #                                                | Protein Name                       |                |          |          |          |          |          |          |          |          |          |                      |          |
|-------------------------|---------|---------|---------|------------------|--------------------------------------------------------------------------|----------------------------------|----------------------------|-----------------------------|----------------------------------|---------|---------------|------------------------------------------------------------------|------------------------------------|----------------|----------|----------|----------|----------|----------|----------|----------|----------|----------|----------------------|----------|
| 1                       | 24.39   | 94.8    | 13      | 2/25             | (P)K E E P A A L L I R I L F I K / R I / A / Y / Q / R R / L / Y / R (S) | 2476.2368                        | 0.0099                     | 4.0                         | 53165.715.83                     | HUMAN   | P23381 632343 | Tryptophanyl-tRNA synthetase, cytoplasmic - Homo sapiens (Human) |                                    |                |          |          |          |          |          |          |          |          |          |                      |          |
| Fragment-ion (m/z)      | 175.118 | 274.184 | 387.270 | 573.335          | 611.341                                                                  | 656.238                          | 701.399                    | 724.416                     | 769.317                          | 802.436 | 873.479       | 906.410                                                          | 1026.551 <sup>+2</sup>             | 1029.493       | 1030.071 | 1073.591 | 1142.540 | 1150.559 | 1187.624 | 1289.607 | 1334.696 | 1447.787 | 1576.826 | 1585.777             | 1688.959 |
| Frac. Inten. (% of TIC) | 5.86    | 2.35    | 3.38    | 7.38             | 3.01                                                                     | 2.06                             | 3.65                       | 1.83                        | 7.23                             | 6.81    | 8.67          | 3.59                                                             | 2.46                               | 6.38           | 3.28     | 3.77     | 5.37     | 1.96     | 4.49     | 2.94     | 5.19     | 2.03     | 2.46     | 1.81                 | 2.06     |
| Rel. Inten. (% of BP)   | 67.54   | 27.13   | 38.99   | 84.88            | 34.70                                                                    | 23.80                            | 42.14                      | 21.07                       | 83.38                            | 78.51   | 100.00        | 41.36                                                            | 28.36                              | 73.63          | 37.88    | 43.51    | 61.98    | 22.63    | 51.74    | 33.87    | 59.91    | 23.39    | 28.37    | 20.93                | 23.74    |
| Score                   | 1.50    | 1.50    | 1.50    | 1.50             | 0.75                                                                     | 0.25                             | 1.50                       | 1.50                        | 0.25                             | 1.50    | 1.50          | 0.50                                                             | 0.50                               | 0.50           | -0.38    | 1.50     | 0.50     | -0.23    | 1.50     | 0.50     | 1.50     | 1.50     | 1.50     | 0.25                 | 1.50     |
| Ion-type                | y1      | y2      | y5      | y5               | PASLLE                                                                   | b <sub>6</sub> -H <sub>2</sub> O | y6                         | y <sup>++13</sup>           | b <sub>7</sub> -H <sub>2</sub> O | y7      | y6            | b <sub>8</sub>                                                   | y19-H <sub>2</sub> O <sup>+2</sup> | b <sub>9</sub> |          | y10      | b10      |          | y11      | b11      | y12      | y13      | y14      | b14-H <sub>2</sub> O | y15      |
| Delta ppm               | -8.3    | -13.7   | -3.2    | -0.5             | 0.5                                                                      | 3.3                              | 6.8                        |                             | -3.7                             | -7.2    | -0.4          | -4.9                                                             | -8.7                               | 35.0           |          | -3.5     | -0.5     |          | -11.7    | -2.1     | -7.7     | -2.3     | -2.9     | 11.9                 | 25.1     |

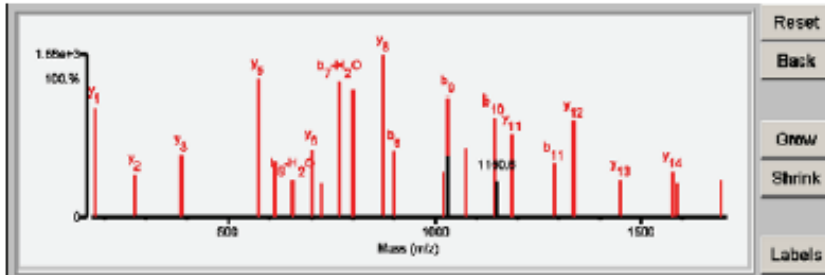

# N70

## Detailed Results

| Rank                    | Score  | SPI (%) | BCS    | # Unmatched Ions | Sequence                   | MH <sup>+</sup> Calculated (Da) | MH <sup>+</sup> Error (Da) | MH <sup>+</sup> Error (ppm) | Protein MW/Pl (Da) | Species | Accession #   | MS-Digest Index #                                     | Protein Name   |                       |         |                |                       |         |                       |         |         |                       |                |          |          |
|-------------------------|--------|---------|--------|------------------|----------------------------|---------------------------------|----------------------------|-----------------------------|--------------------|---------|---------------|-------------------------------------------------------|----------------|-----------------------|---------|----------------|-----------------------|---------|-----------------------|---------|---------|-----------------------|----------------|----------|----------|
| 1                       | 14.02  | 83.1    | 7      | 9/25             | (P)D/PVAIAEILIPFFYGSISR(A) | 1765.8367                       | 0.0061                     | 3.4                         | 69872.777.79       | HUMAN   | P43403 777339 | Tyrosine-protein kinase ZAP-70 - Homo sapiens (Human) |                |                       |         |                |                       |         |                       |         |         |                       |                |          |          |
| Fragment-ion (m/z)      | 70.064 | 72.081  | 86.096 | 110.073          | 175.113                    | 185.166                         | 301.089                    | 322.190                     | 372.119            | 377.194 | 490.277       | 518.248                                               | 580.211        | 662.352 <sup>+2</sup> | 681.244 | 693.295        | 697.870 <sup>+2</sup> | 706.430 | 781.910 <sup>+2</sup> | 813.399 | 848.931 | 862.414 <sup>+2</sup> | 894.380        | 1073.535 | 1186.630 |
| Frac. Inten. (% of TIC) | 0.00   | 2.31    | 0.15   | 0.11             | 1.72                       | 1.56                            | 1.57                       | 1.79                        | 2.17               | 1.89    | 1.56          | 1.87                                                  | 7.73           | 3.31                  | 2.04    | 7.94           | 1.82                  | 2.19    | 26.03                 | 2.22    | 1.51    | 1.60                  | 1.56           | 19.61    | 5.73     |
| Rel. Inten. (% of BP)   | 0.01   | 8.88    | 0.59   | 0.43             | 6.60                       | 6.00                            | 6.04                       | 6.87                        | 8.33               | 7.26    | 6.00          | 7.18                                                  | 29.69          | 12.70                 | 7.84    | 30.51          | 6.99                  | 8.43    | 100.00                | 8.53    | 5.80    | 6.14                  | 5.98           | 75.33    | 21.99    |
| Score                   | 0.20   | -0.09   | 0.22   | 1.00             | 1.50                       | -0.06                           | 0.50                       | 0.75                        | 0.50               | 0.75    | 0.75          | -0.07                                                 | 0.50           | 1.50                  | -0.08   | 0.50           | 1.50                  | -0.08   | 1.50                  | -0.09   | -0.06   | -0.06                 | -0.06          | 1.50     | 1.50     |
| Ion-type                | PR     |         | LI     | H                | y1                         |                                 | b <sub>2</sub>             | AHL                         | b <sub>3</sub>     | PAAH    | AAHLP         |                                                       | b <sub>5</sub> | y11 <sup>+2</sup>     |         | b <sub>6</sub> | y12 <sup>+2</sup>     |         | y14 <sup>+2</sup>     |         |         |                       | y <sub>9</sub> | y10      |          |
| Delta ppm               | -13.2  |         | -9.6   | 16.6             | -35.1                      |                                 | 9.7                        | 6.0                         | -11.8              | 0.3     | -2.5          |                                                       | -14.0          | 8.7                   |         | -11.9          | 8.7                   |         | 0.3                   |         |         |                       | -6.0           | 3.7      |          |

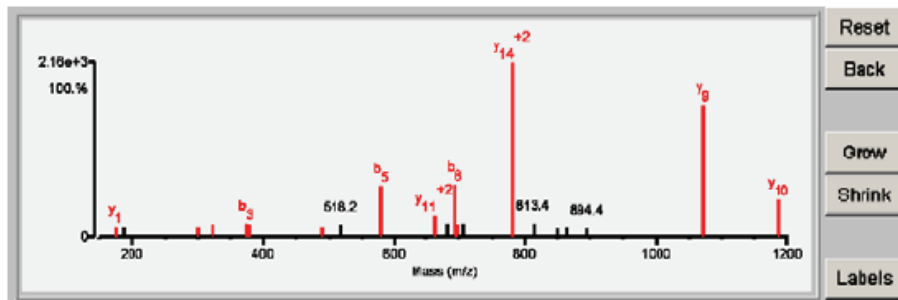

# N71

## Detailed Results

| Rank | Score | SPI (%) | BCS | # Unmatched Ions | Sequence                          | MH <sup>+</sup> Calculated (Da) | MH <sup>+</sup> Error (Da) | MH <sup>+</sup> Error (ppm) | Protein MW <sub>pl</sub> (Da) | Species | Accession # | MS-Digest Index # | Protein Name                                                 |
|------|-------|---------|-----|------------------|-----------------------------------|---------------------------------|----------------------------|-----------------------------|-------------------------------|---------|-------------|-------------------|--------------------------------------------------------------|
| 1    | 20.03 | 82.7    | 11  | 4/26             | (V)KLTAEILIIHQAAIQ/TIT/WA/Y/R (D) | 2242.0895                       | -0.0098                    | -4.4                        | 28416.718.71                  | HUMAN   | P09881      | 573058            | U2 small nuclear ribonucleoprotein A' - Homo sapiens (Human) |

  

| Fragment-ion (m/z)      | 88.099 | 176.118        | 274.186        | 278.182 | 346.223        | 458.284        | 648.238                          | 690.314        | 619.270                          | 873.280 | 723.378        | 788.320        | 788.348 | 861.428        | 878.401        | 898.434 | 922.473        | 992.487        | 1233.578                         | 1260.805        | 1320.850        | 1363.878        | 1891.870        | 1478.768        | 1882.770        |
|-------------------------|--------|----------------|----------------|---------|----------------|----------------|----------------------------------|----------------|----------------------------------|---------|----------------|----------------|---------|----------------|----------------|---------|----------------|----------------|----------------------------------|-----------------|-----------------|-----------------|-----------------|-----------------|-----------------|
| Frac. Inten. (% of TIC) | 0.05   | 6.63           | 1.39           | 1.81    | 2.70           | 4.07           | 1.19                             | 5.74           | 2.01                             | 1.62    | 8.95           | 6.31           | 1.67    | 6.23           | 7.51           | 2.23    | 7.40           | 10.63          | 1.26                             | 6.90            | 5.82            | 3.29            | 1.42            | 1.72            | 1.45            |
| Rel. Inten. (% of BP)   | 0.45   | 62.40          | 13.12          | 17.05   | 25.37          | 38.28          | 11.19                            | 53.95          | 18.87                            | 15.21   | 84.22          | 59.37          | 15.70   | 58.57          | 70.62          | 20.95   | 69.62          | 100.00         | 11.84                            | 64.91           | 54.75           | 30.94           | 13.38           | 15.19           | 13.63           |
| Score                   | 0.22   | 1.90           | 1.50           | -0.17   | 1.50           | 1.90           | 0.25                             | 1.50           | 0.25                             | -0.15   | 1.50           | 0.50           | -0.16   | 1.50           | 0.50           | -0.21   | 1.50           | 0.50           | 1.50                             | 1.50            | 1.50            | 1.50            | 1.50            | 1.50            | 0.90            |
| Ion-type                | LI     | y <sub>1</sub> | y <sub>2</sub> |         | y <sub>3</sub> | y <sub>4</sub> | b <sub>3</sub> -H <sub>2</sub> O | y <sub>5</sub> | b <sub>4</sub> -H <sub>2</sub> O |         | y <sub>6</sub> | b <sub>5</sub> |         | a <sub>6</sub> | b <sub>6</sub> |         | y <sub>8</sub> | b <sub>7</sub> | y <sub>11</sub> -NH <sub>3</sub> | y <sub>11</sub> | b <sub>10</sub> | a <sub>11</sub> | b <sub>11</sub> | y <sub>13</sub> | b <sub>13</sub> |
| Delta ppm               | -4.9   | -8.3           | -9.7           |         | -4.3           | -7.2           | -1.4                             | -2.3           | -7.4                             |         | -3.3           | -10.0          |         |                | -11.6          |         | -0.9           | -8.5           | -5.4                             | -7.3            | -2.9            |                 | 1.2             | -16.9           | -13.4           |

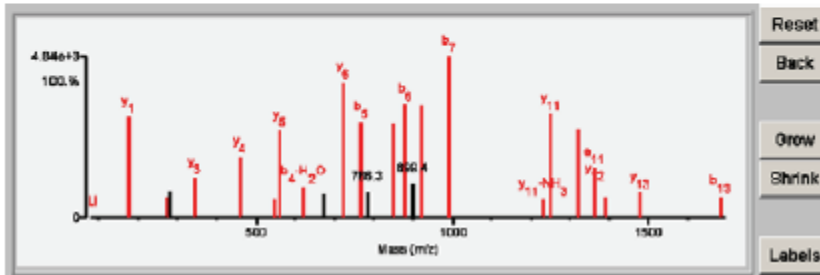

# N72

## Detailed Results

| Rank | Score | SPI (%) | BCS | # Unmatched Ions | Sequence            | MH <sup>+</sup> Calculated (Da) | MH <sup>+</sup> Error (Da) | MH <sup>+</sup> Error (ppm) | Protein MW <sub>pl</sub> (Da) | Species | Accession # | MS-Digest Index # | Protein Name                                    |
|------|-------|---------|-----|------------------|---------------------|---------------------------------|----------------------------|-----------------------------|-------------------------------|---------|-------------|-------------------|-------------------------------------------------|
| 1    | 11.81 | 78.0    | 6   | 9/25             | (-)IΣIV/C/N D/R (L) | 1035.4598                       | 0.0109                     | 10.6                        | 8547.018.58                   | HUMAN   | Q9BZL1      | 677685            | Ubiquitin-like protein 5 - Homo sapiens (Human) |

  

| Fragment-ion (m/z)      | 70.067 | 72.081 | 84.044 | 86.096 | 102.055 | 158.089 | 168.103                         | 174.092        | 175.118        | 183.105 | 201.113 | 202.092        | 227.177 | 251.067 | 331.130        | 337.119 | 404.183        | 430.197        | 444.705 <sup>+2</sup> | 507.193        | 537.753 | 606.264        | 692.900 | 705.338        | 834.378        |
|-------------------------|--------|--------|--------|--------|---------|---------|---------------------------------|----------------|----------------|---------|---------|----------------|---------|---------|----------------|---------|----------------|----------------|-----------------------|----------------|---------|----------------|---------|----------------|----------------|
| Frac. Inten. (% of TIC) | 0.00   | 0.32   | 0.13   | 0.28   | 0.28    | 1.97    | 1.71                            | 12.46          | 7.27           | 2.44    | 2.23    | 9.50           | 1.81    | 5.31    | 6.57           | 1.81    | 3.76           | 2.63           | 2.20                  | 8.84           | 2.59    | 13.67          | 1.92    | 5.88           | 3.62           |
| Rel. Inten. (% of BP)   | 0.03   | 2.34   | 0.95   | 1.88   | 2.06    | 14.44   | 12.50                           | 91.15          | 53.19          | 17.88   | 16.30   | 69.50          | 13.27   | 38.87   | 48.10          | 13.24   | 27.54          | 19.27          | 16.11                 | 70.57          | 18.95   | 100.00         | 14.03   | 43.06          | 26.51          |
| Score                   | 0.20   | 0.50   |        | 0.22   | 1.00    | 0.50    | -0.12                           | 0.50           | 1.50           | -0.18   | -0.16   | 0.50           | -0.13   | -0.39   | 0.50           | -0.13   | 1.50           | 0.50           | -0.16                 | 1.50           | -0.19   | 1.50           | -0.14   | 1.50           | 1.50           |
| Ion-type                | PR     | V      |        | E      | LI      | E       | y <sub>1</sub> -NH <sub>3</sub> | a <sub>1</sub> | y <sub>1</sub> |         |         | b <sub>1</sub> |         |         | b <sub>2</sub> |         | y <sub>3</sub> | b <sub>3</sub> |                       | y <sub>4</sub> |         | y <sub>5</sub> |         | y <sub>6</sub> | y <sub>7</sub> |
| Delta ppm               | 21.0   | 5.9    |        | -7.3   | 4.4     | -22.8   |                                 | -24.7          | -6.6           |         |         | 3.8            |         |         | -9.1           |         | -15.1          | -11.0          |                       | -10.1          |         | -3.7           |         | 4.3            | 0.7            |

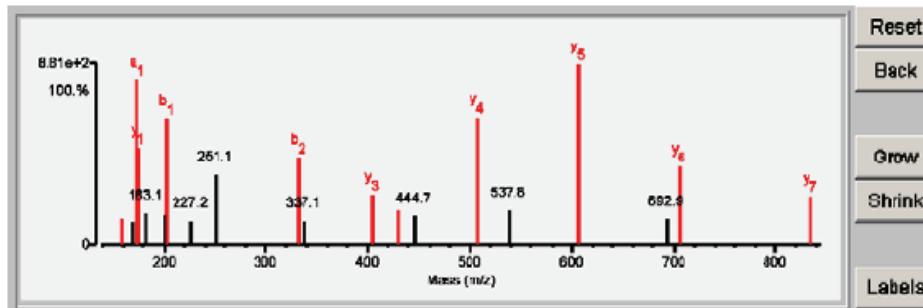

# N73

## Detailed Results

| Rank                    | Score  | SPI (%) | BCS    | # Unmatched Ions | Sequence                           | MH <sup>+</sup> Calculated (Da) | MH <sup>+</sup> Error (Da) | MH <sup>+</sup> Error (ppm) | Protein MW/pI (Da)    | Species               | Accession #                                     | MS-Digest Index # | Protein Name                                            |                       |         |                       |                       |         |         |         |                       |         |         |          |          |
|-------------------------|--------|---------|--------|------------------|------------------------------------|---------------------------------|----------------------------|-----------------------------|-----------------------|-----------------------|-------------------------------------------------|-------------------|---------------------------------------------------------|-----------------------|---------|-----------------------|-----------------------|---------|---------|---------|-----------------------|---------|---------|----------|----------|
| 1                       | 23.88  | 88.7    | 10     | 1/26             | (-)N/V/D/E/V/N/L/L/V/E/E/I/I/R (L) | 1908.8331                       | 0.0121                     | 6.3                         | 9056.5/5.88           | HUMAN                 | <a href="#">Q9P1F3</a><br><a href="#">76776</a> |                   | Uncharacterized protein C6orf115 - Homo sapiens (Human) |                       |         |                       |                       |         |         |         |                       |         |         |          |          |
| Fragment-ion (m/z)      | 72.081 | 88.098  | 87.056 | 110.088          | 120.081                            | 175.118                         | 205.048                    | 312.178                     | 333.173 <sup>+2</sup> | 342.180 <sup>+2</sup> | 381.710 <sup>+2</sup>                           | 435.288           | 448.268 <sup>+2</sup>                                   | 505.228 <sup>+2</sup> | 554.304 | 581.788 <sup>+2</sup> | 587.888 <sup>+3</sup> | 886.336 | 883.348 | 782.413 | 801.810 <sup>+2</sup> | 886.487 | 888.357 | 1008.441 | 1122.627 |
| Frac. Inten. (% of TIC) | 0.22   | 0.83    | 0.08   | 0.04             | 1.30                               | 3.48                            | 1.19                       | 2.09                        | 2.18                  | 1.04                  | 4.14                                            | 2.81              | 2.33                                                    | 3.79                  | 5.35    | 1.97                  | 1.04                  | 1.35    | 13.97   | 16.76   | 1.58                  | 2.00    | 14.25   | 12.38    | 3.83     |
| Rel. Inten. (% of BP)   | 1.31   | 4.93    | 0.45   | 0.23             | 7.76                               | 20.82                           | 7.11                       | 12.46                       | 13.02                 | 6.19                  | 24.67                                           | 16.74             | 13.88                                                   | 22.62                 | 31.89   | 11.76                 | 6.19                  | 8.07    | 83.36   | 100.00  | 5.40                  | 11.95   | 85.03   | 73.84    | 22.86    |
| Score                   | 0.50   | 0.22    | 0.33   | 1.00             | -0.08                              | 1.50                            | 0.50                       | 1.50                        | 0.50                  | 1.50                  | 1.50                                            | 1.50              | 1.50                                                    | 0.50                  | 1.50    | 0.50                  | 1.50                  | 1.50    | 1.50    | 1.50    | 1.50                  | 1.50    | 0.50    | 0.50     | 0.50     |
| Ion-type                | V      | LI      | NR     | H                |                                    | y1                              | b1                         | y2                          | y5-H2O <sup>+2</sup>  | y5 <sup>+2</sup>      | y6 <sup>+2</sup>                                | y6                | y7 <sup>+2</sup>                                        | b8 <sup>+2</sup>      | y4      | b9 <sup>+2</sup>      | a14 <sup>+3</sup>     | y5-H2O  | y6      | y8      | y13 <sup>+2</sup>     | y7      | b7      | b6       | b9       |
| Delta ppm               | 1.7    | -1.5    | -5.6   | -17.9            |                                    | -1.4                            | -2.9                       | 0.1                         | 1.8                   | 9.1                   | -2.6                                            | 2.5               | 4.8                                                     | -2.7                  | -0.2    | 2.1                   |                       | -2.8    | -1.9    | -2.7    | -6.2                  | -2.4    | -1.0    | -1.0     | 1.1      |

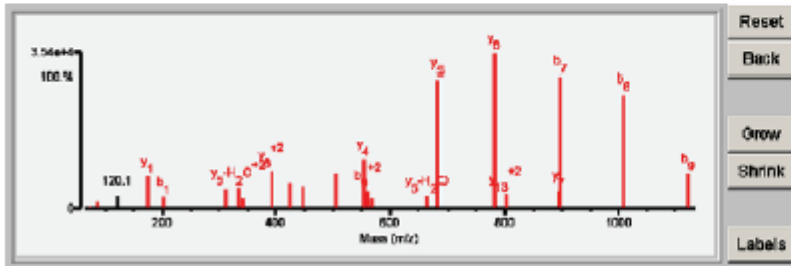

# N74

## Detailed Results

| Rank                    | Score  | SPI (%) | BCS    | # Unmatched Ions | Sequence                            | MH <sup>+</sup> Calculated (Da) | MH <sup>+</sup> Error (Da) | MH <sup>+</sup> Error (ppm) | Protein MW/pI (Da) | Species | Accession #                                     | MS-Digest Index # | Protein Name                                            |         |         |         |         |         |                       |         |         |         |         |         |         |
|-------------------------|--------|---------|--------|------------------|-------------------------------------|---------------------------------|----------------------------|-----------------------------|--------------------|---------|-------------------------------------------------|-------------------|---------------------------------------------------------|---------|---------|---------|---------|---------|-----------------------|---------|---------|---------|---------|---------|---------|
| 1                       | 11.28  | 59.0    | 9      | 9/25             | (N) V D E E/V/N L/L/V/E/E/I/I/R (L) | 1789.8901                       | 0.0064                     | 3.6                         | 9056.5/5.86        | HUMAN   | <a href="#">Q9P1F3</a><br><a href="#">76775</a> |                   | Uncharacterized protein C6orf115 - Homo sapiens (Human) |         |         |         |         |         |                       |         |         |         |         |         |         |
| Fragment-ion (m/z)      | 70.065 | 72.080  | 86.097 | 94.065           | 110.071                             | 120.078                         | 136.075                    | 160.075                     | 175.117            | 187.144 | 312.171                                         | 358.164           | 391.715 <sup>+2</sup>                                   | 425.258 | 439.217 | 524.160 | 554.300 | 569.195 | 621.359 <sup>+2</sup> | 655.690 | 665.343 | 668.273 | 683.340 | 782.373 | 895.390 |
| Frac. Inten. (% of TIC) | 0.00   | 0.45    | 0.75   | 2.66             | 0.21                                | 2.75                            | 3.10                       | 3.03                        | 3.29               | 3.16    | 4.11                                            | 5.64              | 3.79                                                    | 5.46    | 6.57    | 2.94    | 2.73    | 4.62    | 2.82                  | 2.79    | 3.24    | 2.70    | 7.88    | 14.19   | 11.12   |
| Rel. Inten. (% of BP)   | 0.03   | 3.20    | 5.27   | 18.74            | 1.48                                | 19.36                           | 21.81                      | 21.32                       | 23.20              | 22.29   | 28.87                                           | 39.71             | 26.71                                                   | 38.50   | 46.30   | 20.75   | 19.25   | 32.56   | 19.86                 | 19.67   | 22.85   | 19.00   | 55.52   | 100.00  | 78.34   |
| Score                   | 0.20   | 0.50    | 0.22   | -0.19            | 1.00                                | -0.19                           | -0.22                      | 0.50                        | 1.50               | -0.22   | 1.50                                            | 0.75              | 1.50                                                    | 1.50    | -0.46   | -0.21   | 1.50    | 0.50    | -0.20                 | -0.20   | 0.50    | 1.50    | 1.50    | 1.50    | 0.50    |
| Ion-type                | PR     | V       | LI     |                  | H                                   |                                 | a1                         | y1                          | y2                 | VEE     | y6 <sup>+2</sup>                                | y3                | b+++                                                    | b4      |         | b4      |         | y5-H2O  | b5                    | b+++11  | b7      |         |         |         |         |
| Delta ppm               | -0.4   | -9.4    | 3.2    |                  | -1.6                                |                                 | -31.0                      | -13.4                       |                    | -21.3   | 5.4                                             | 10.2              | -9.2                                                    |         |         | 38.0    | -15.3   |         | 9.5                   | 1.7     | 25.7    |         |         |         |         |

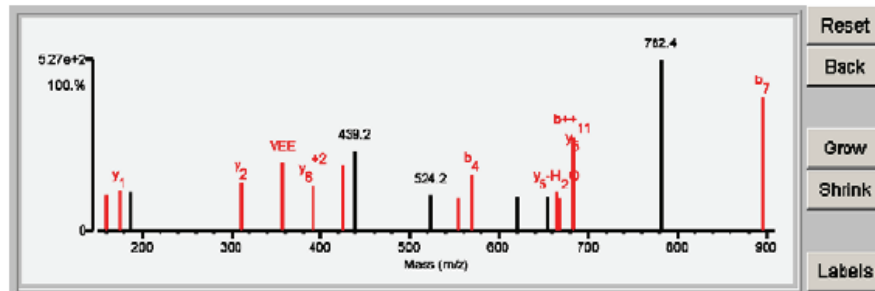

# N75

## Detailed Results

| Rank                    | Score  | SPI (%) | BCS    | # Unmatched Ions | Sequence                                  | MH <sup>+</sup> Calculated (Da) | MH <sup>+</sup> Error (Da) | MH <sup>+</sup> Error (ppm) | Protein MW/pl (Da) | Species | Accession #            | MS-Digest Index #      | Protein Name                                   |         |         |         |                       |         |         |         |         |         |         |         |          |
|-------------------------|--------|---------|--------|------------------|-------------------------------------------|---------------------------------|----------------------------|-----------------------------|--------------------|---------|------------------------|------------------------|------------------------------------------------|---------|---------|---------|-----------------------|---------|---------|---------|---------|---------|---------|---------|----------|
| 1                       | 14.98  | 77.2    | 9      | 7/25             | (-) F V A E L N N I L L N T E T P D R (A) | 1733.8527                       | -0.0040                    | -2.3                        | 29793.5/6.36       | HUMAN   | <a href="#">Q0PNE2</a> | <a href="#">650933</a> | UPF0405 protein TMEM103 - Homo sapiens (Human) |         |         |         |                       |         |         |         |         |         |         |         |          |
| Fragment-ion (m/z)      | 70.067 | 72.080  | 84.045 | 86.097           | 110.070                                   | 120.081                         | 136.073                    | 175.121                     | 208.082            | 229.114 | 335.146                | 387.195                | 464.187                                        | 488.247 | 576.796 | 686.857 | 690.811 <sup>+2</sup> | 703.337 | 778.365 | 805.342 | 816.412 | 918.437 | 929.506 | 935.438 | 1157.598 |
| Frac. Inten. (% of TIC) | 0.00   | 0.29    | 0.10   | 0.15             | 2.71                                      | 0.11                            | 3.17                       | 3.40                        | 3.94               | 3.66    | 5.95                   | 13.51                  | 4.63                                           | 6.36    | 3.25    | 3.23    | 3.51                  | 7.81    | 4.17    | 6.17    | 8.08    | 7.14    | 3.16    | 2.79    | 2.69     |
| Rel. Inten. (% of BP)   | 0.04   | 2.18    | 0.71   | 1.13             | 20.10                                     | 0.84                            | 23.46                      | 25.17                       | 29.17              | 27.10   | 44.03                  | 100.00                 | 34.32                                          | 47.11   | 24.07   | 23.95   | 25.98                 | 57.85   | 30.90   | 45.70   | 59.82   | 52.89   | 23.36   | 20.85   | 19.93    |
| Score                   | 0.20   | 0.50    | 1.00   | 0.22             | -0.20                                     | 1.00                            | -0.23                      | 1.50                        | 0.50               | 0.75    | 0.50                   | 1.50                   | 0.50                                           | 1.50    | -0.24   | -0.24   | -0.26                 | 1.50    | -0.31   | 0.50    | 1.50    | 0.50    | 1.50    | -0.21   | 1.50     |
| Ion-type                | PR     | V       | E      | LI               |                                           | F                               |                            | y1                          | a1                 | VE      | b2                     |                        | b3                                             | y4      |         |         | y6                    |         | b6      | y7      | b7      | y8      |         | y10     |          |
| Delta ppm               | 23.9   | -5.2    | 2.5    | 3.2              |                                           | 1.9                             |                            | 10.0                        | 7.4                | -24.8   | 8.7                    |                        | -8.4                                           | 1.8     | 0.3     |         |                       | -0.2    |         | -18.0   | -11.5   | -3.2    | 0.8     |         | 6.4      |

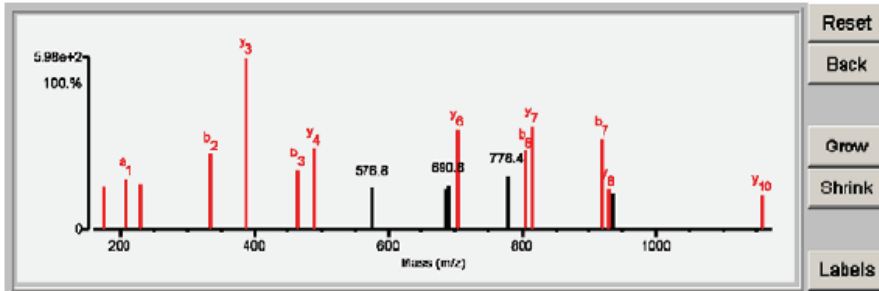

# N76

## Detailed Results

| Rank                    | Score  | SPI (%) | BCS    | # Unmatched Ions | Sequence                                | MH <sup>+</sup> Calculated (Da) | MH <sup>+</sup> Error (Da) | MH <sup>+</sup> Error (ppm) | Protein MW/pl (Da) | Species | Accession #            | MS-Digest Index #      | Protein Name                                                           |                     |         |         |                     |         |         |         |         |         |         |         |          |
|-------------------------|--------|---------|--------|------------------|-----------------------------------------|---------------------------------|----------------------------|-----------------------------|--------------------|---------|------------------------|------------------------|------------------------------------------------------------------------|---------------------|---------|---------|---------------------|---------|---------|---------|---------|---------|---------|---------|----------|
| 1                       | 19.42  | 91.1    | 10     | 2/25             | (V) F V E I S I V I V I V D V L N R (F) | 1364.6879                       | -0.0017                    | -1.3                        | 360278.0/5.94      | HUMAN   | <a href="#">Q96RL7</a> | <a href="#">698431</a> | Vacuolar protein sorting-associated protein 13A - Homo sapiens (Human) |                     |         |         |                     |         |         |         |         |         |         |         |          |
| Fragment-ion (m/z)      | 60.047 | 70.065  | 72.082 | 84.045           | 86.096                                  | 102.055                         | 120.080                    | 175.117                     | 199.074            | 208.076 | 236.070                | 289.153                | 365.115                                                                | 402.233             | 434.140 | 452.142 | 501.316             | 533.202 | 551.220 | 616.332 | 650.272 | 715.407 | 814.470 | 913.535 | 1000.568 |
| Frac. Inten. (% of TIC) | 1.56   | 0.00    | 0.10   | 0.05             | 0.28                                    | 0.07                            | 0.10                       | 5.34                        | 7.32               | 4.79    | 5.20                   | 1.79                   | 1.49                                                                   | 2.51                | 12.10   | 1.64    | 3.31                | 11.44   | 1.68    | 4.64    | 2.79    | 10.02   | 17.80   | 2.00    | 1.88     |
| Rel. Inten. (% of BP)   | 8.76   | 0.01    | 0.57   | 0.27             | 1.60                                    | 0.38                            | 0.54                       | 29.97                       | 41.09              | 26.93   | 29.20                  | 10.05                  | 8.39                                                                   | 14.10               | 67.99   | 9.21    | 18.58               | 64.23   | 9.43    | 26.07   | 15.67   | 58.28   | 100.00  | 11.25   | 11.14    |
| Score                   | -0.09  | 0.20    | 0.50   |                  | 0.22                                    | 1.00                            | 1.00                       | 1.50                        | -0.41              | 0.50    | 0.50                   | 1.50                   | 0.50                                                                   | 1.50                | 0.25    | 0.50    | 1.50                | 0.25    | 0.50    | 1.50    | 0.50    | 1.50    | 1.50    | 1.50    | 1.50     |
| Ion-type                | PR     | V       | E      | LI               |                                         | E                               | F                          | y1                          | a1                 | b1      | y2                     | b2                     | y3                                                                     | b3-H <sub>2</sub> O | b3      | y4      | b4-H <sub>2</sub> O | b4      | y5      | b5      | y6      | y7      | y8      | y9      |          |
| Delta ppm               |        | -4.8    | 11.4   |                  | -6.1                                    | -4.5                            | -9.8                       | -13.4                       |                    | -22.4   | -21.5                  | -31.1                  | -8.1                                                                   | -32.2               | 1.1     | -16.1   | 2.5                 | -10.0   | 3.6     | -14.6   | -22.5   | -3.8    | -9.6    | -12.6   | -10.6    |

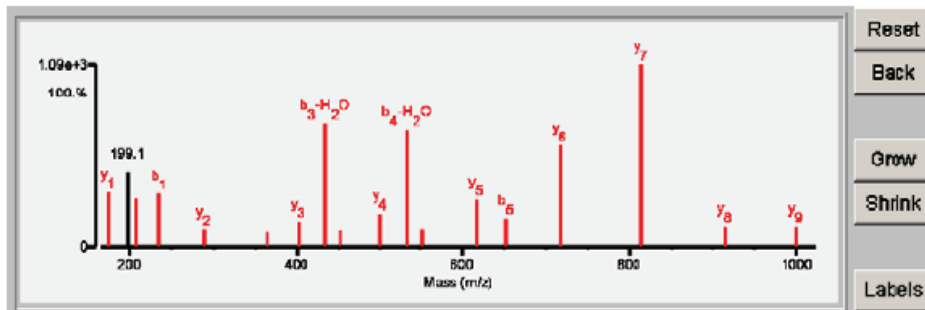

# N77

## Detailed Results

| Rank | Score | SPI (%) | BCS | # Unmatched Ions | Sequence                      | MH <sup>+</sup> Calculated (Da) | MH <sup>+</sup> Error (Da) | MH <sup>+</sup> Error (ppm) | Protein MW (Da) | Species | Accession #            | MS-Digest Index #      | Protein Name                                              |
|------|-------|---------|-----|------------------|-------------------------------|---------------------------------|----------------------------|-----------------------------|-----------------|---------|------------------------|------------------------|-----------------------------------------------------------|
| 1    | 15.84 | 88.8    | 8   | 8/25             | (V) L I L I (T) H I A / R (V) | 806.4847                        | 0.0044                     | 4.9                         | 24740.78.87     | HUMAN   | <a href="#">Q75388</a> | <a href="#">584753</a> | Vesicle-trafficking protein SEC22b - Homo sapiens (Human) |

  

| Fragment-Ion (m/z)      | 88.088 | 87.102 | 167.100 | 174.086 | 176.120 | 187.142 | 202.080 | 208.177 | 216.146 | 228.130 | 248.168 | 316.174 | 328.188 | 343.705 <sup>+2</sup> | 362.711 <sup>+2</sup> | 368.240 | 388.226 | 388.208 | 418.218 | 480.284 | 547.281 | 681.328 | 801.317 | 888.402            | 704.416 |
|-------------------------|--------|--------|---------|---------|---------|---------|---------|---------|---------|---------|---------|---------|---------|-----------------------|-----------------------|---------|---------|---------|---------|---------|---------|---------|---------|--------------------|---------|
| Frac. Inten. (% of TIC) | 1.16   | 1.97   | 1.47    | 9.46    | 2.43    | 1.32    | 3.50    | 1.27    | 2.70    | 1.33    | 2.10    | 5.26    | 1.29    | 5.67                  | 3.87                  | 7.47    | 2.01    | 2.30    | 2.13    | 10.50   | 1.36    | 17.63   | 2.21    | 2.31               | 7.31    |
| Rel. Inten. (% of BP)   | 6.59   | 11.17  | 8.34    | 53.60   | 13.76   | 7.47    | 19.87   | 7.18    | 15.30   | 7.52    | 11.92   | 29.82   | 7.30    | 32.17                 | 21.96                 | 42.38   | 11.41   | 13.06   | 12.06   | 59.59   | 7.74    | 100.00  | 12.52   | 13.09              | 41.47   |
| Score                   | 0.22   | -0.11  | -0.08   | 0.50    | 1.50    | 0.50    | 0.50    | -0.07   | 0.75    | 0.50    | 1.50    | 0.50    | -0.07   | 0.50                  | 1.50                  | 1.50    | -0.11   | 0.25    | 0.50    | 1.50    | 0.50    | 1.50    | -0.13   | 0.50               | 1.50    |
| Ion-type                | LI     |        |         | b1      | y1      | LT-28   | b1      |         | LT      | y2-NH3  | y2      |         |         | y6 <sup>+H2O</sup> +2 | y6 <sup>+2</sup>      | y3      |         | b3-H2O  | b3      | y4      | b4      | y5      |         | y6 <sup>+H2O</sup> | y6      |
| Delta ppm               | 16.0   |        |         | -2.9    | 7.1     | -17.6   | -3.6    |         | 22.7    | 2.1     | 5.8     |         |         | -1.5                  | 0.8                   | -1.2    |         | -6.5    | -7.8    | 5.9     | 33.5    | -0.8    |         | 0.3                | 3.3     |

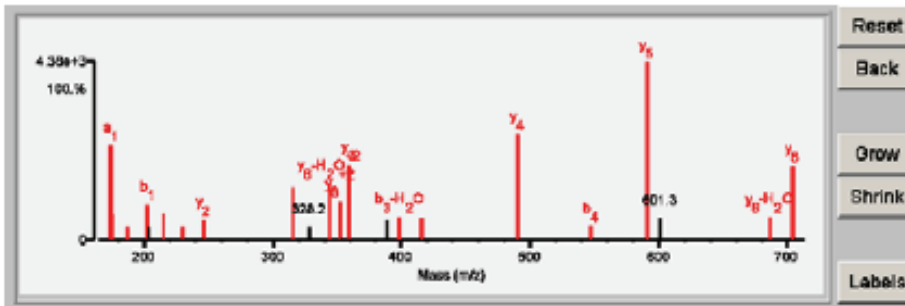

# N78

## Detailed Results

| Rank | Score | SPI (%) | BCS | # Unmatched Ions | Sequence                          | MH <sup>+</sup> Calculated (Da) | MH <sup>+</sup> Error (Da) | MH <sup>+</sup> Error (ppm) | Protein MW (Da) | Species | Accession #            | MS-Digest Index #      | Protein Name                                                          |
|------|-------|---------|-----|------------------|-----------------------------------|---------------------------------|----------------------------|-----------------------------|-----------------|---------|------------------------|------------------------|-----------------------------------------------------------------------|
| 1    | 12.52 | 68.2    | 7   | 3/25             | (-) L V L V L C D L R I P R R (C) | 1569.8934                       | 0.0219                     | 13.9                        | 20505.816.28    | HUMAN   | <a href="#">Q9UBQ0</a> | <a href="#">700045</a> | Vacuolar protein sorting-associated protein 29 - Homo sapiens (Human) |

  

| Fragment-Ion (m/z)      | 72.080 | 73.080 | 86.094 | 102.062 | 106.064 | 110.073 | 156.074 | 160.040 | 174.095 | 175.115 | 185.170 | 213.162 | 234.126 | 301.152 | 311.112 | 312.235 | 391.231 | 409.232 | 472.769          | 529.287 <sup>+2</sup> | 536.283 | 540.182 | 578.842 <sup>+2</sup> | 635.368 <sup>+2</sup> | 659.383 |
|-------------------------|--------|--------|--------|---------|---------|---------|---------|---------|---------|---------|---------|---------|---------|---------|---------|---------|---------|---------|------------------|-----------------------|---------|---------|-----------------------|-----------------------|---------|
| Frac. Inten. (% of TIC) | 0.83   | 2.89   | 0.38   | 2.93    | 4.59    | 0.15    | 2.80    | 4.81    | 3.78    | 2.74    | 8.91    | 6.77    | 3.72    | 2.66    | 2.71    | 2.54    | 4.35    | 9.22    | 5.27             | 7.38                  | 5.04    | 2.99    | 6.47                  | 3.45                  | 2.63    |
| Rel. Inten. (% of BP)   | 8.96   | 31.39  | 4.10   | 31.79   | 49.78   | 1.58    | 30.37   | 52.22   | 40.94   | 29.74   | 96.66   | 73.44   | 40.31   | 28.88   | 29.43   | 27.50   | 47.15   | 100.00  | 57.13            | 80.04                 | 54.62   | 32.46   | 70.18                 | 37.37                 | 28.53   |
| Score                   | 0.50   | -0.31  | 0.22   | -0.32   | -0.50   | 1.00    | -0.30   | -0.52   | 0.50    | 1.50    | 0.50    | 0.75    | -0.40   | 0.50    | -0.29   | 0.75    | -0.47   | 1.50    | 1.50             | 1.50                  | 0.75    | -0.32   | 1.50                  | 1.50                  | 1.50    |
| Ion-type                | V      |        | LI     |         |         | H       |         |         | a1      | y1      | VL-28   | VL      |         | b2      |         | VLV     |         | y3      | y <sup>++a</sup> | y9 <sup>+2</sup>      | GDLHI   |         | y10 <sup>+2</sup>     | y11 <sup>+2</sup>     | y6      |
| Delta ppm               | -5.2   |        | -23.5  |         |         | 11.1    |         |         | -2.9    | -23.7   |         | 4.9     |         | -22.4   |         | 17.4    |         | 3.8     | 27.1             | -21.6                 | -0.8    |         | 16.4                  | -11.3                 | 13.6    |

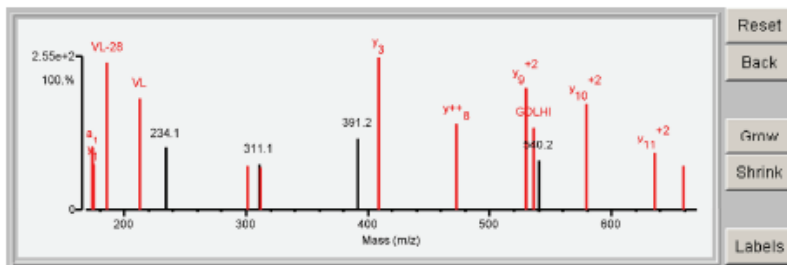

# N79

## Detailed Results

| Rank | Score | SP1 (%) | BC8 | # Unmatched Ions | Sequence                          | MH <sup>+</sup> Calculated (Da) | MH <sup>+</sup> Error (Da) | MH <sup>+</sup> Error (ppm) | Protein MW/pi (Da) | Species | Accession #            | M8-Digest Index #      | Protein Name                                                           |
|------|-------|---------|-----|------------------|-----------------------------------|---------------------------------|----------------------------|-----------------------------|--------------------|---------|------------------------|------------------------|------------------------------------------------------------------------|
| 1    | 18.48 | 86.0    | 8   | 3/26             | (V) I/V/R (V) I/V/A/D/L I/W/R (F) | 1316.8879                       | 0.0006                     | 0.3                         | 422382.3/8.38      | HUMAN   | <a href="#">Q709C8</a> | <a href="#">898448</a> | Vacuolar protein sorting-associated protein 13C - Homo sapiens (Human) |

  

| Fragment-Ion (m/z)      | 72.082 | 88.088 | 102.053 | 174.083 | 175.116 | 198.076 | 202.089 | 288.180 | 331.138 | 400.162 | 413.197 | 418.188 | 471.224 | 488.221 | 516.330 | 617.280 | 618.301 | 830.356 | 883.408 | 887.320 | 701.383 | 783.426 | 800.468 | 898.627 | 888.688 |
|-------------------------|--------|--------|---------|---------|---------|---------|---------|---------|---------|---------|---------|---------|---------|---------|---------|---------|---------|---------|---------|---------|---------|---------|---------|---------|---------|
| Frag. Inten. (% of TIC) | 0.08   | 0.16   | 0.07    | 3.65    | 2.25    | 2.18    | 2.42    | 3.21    | 3.03    | 13.33   | 1.74    | 3.63    | 1.05    | 10.75   | 2.52    | 4.25    | 1.75    | 4.75    | 1.13    | 1.12    | 9.68    | 1.26    | 19.26   | 2.73    | 3.93    |
| Rel. Inten. (% of BP)   | 0.40   | 0.85   | 0.38    | 18.98   | 11.66   | 11.30   | 12.57   | 16.55   | 15.72   | 69.17   | 9.01    | 18.86   | 5.45    | 55.78   | 13.08   | 22.08   | 9.15    | 24.88   | 5.88    | 5.83    | 50.26   | 6.54    | 100.00  | 14.19   | 20.40   |
| Score                   | 0.50   | 0.22   | 1.00    | 0.50    | 1.50    | -0.11   | 0.50    | 1.50    | 0.50    | 0.25    | -0.09   | 0.50    | -0.05   | 0.25    | 1.50    | 0.50    | 0.50    | 1.50    | 0.50    | 0.50    | 1.50    | 0.50    | 1.50    | 1.50    | 1.50    |
| Ion-type                | V      | LI     | E       | a1      | y1      |         |         | b1      | y2      | b2      | b3+H2O  |         |         | b4+H2O  | y4      | b4      | b5      | y5      | y6+H2O  | b5      | y5      | y7+NH3  | y7      | y8      | y9      |
| Delta ppm               | 11.4   | -7.3   | -20.1   | -17.9   | -22.0   |         |         | -10.0   | -7.5    | 12.9    | -7.9    |         |         | -4.8    | 0.4     | -6.5    | -1.6    | -3.1    | 37.2    | -27.5   | -1.9    | -14.3   | -8.6    | -4.9    | 2.8     |

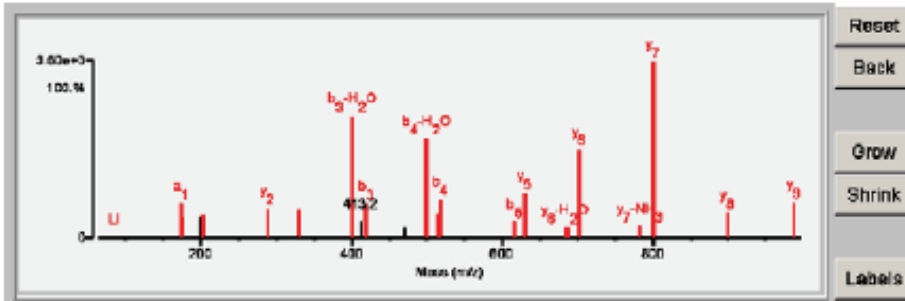

# N80

## Detailed Results

| Rank | Score | SP1 (%) | BC8 | # Unmatched Ions | Sequence                    | MH <sup>+</sup> Calculated (Da) | MH <sup>+</sup> Error (Da) | MH <sup>+</sup> Error (ppm) | Protein MW/pi (Da) | Species | Accession #            | M8-Digest Index #      | Protein Name                                    |
|------|-------|---------|-----|------------------|-----------------------------|---------------------------------|----------------------------|-----------------------------|--------------------|---------|------------------------|------------------------|-------------------------------------------------|
| 1    | 10.84 | 68.8    | 8   | 12/25            | (F) P/V/I/V/T/S/R/L/L/R (Q) | 1285.8981                       | 0.0062                     | 4.1                         | 88918.2/6.42       | HUMAN   | <a href="#">Q8NGW7</a> | <a href="#">706883</a> | Xaa-Pro aminopeptidase 1 - Homo sapiens (Human) |

  

| Fragment-Ion (m/z)      | 70.088 | 72.082 | 84.082 | 88.087 | 84.088 | 158.084 | 175.117 | 188.088 | 205.088 | 263.148 | 288.204 | 368.110 | 401.280 | 427.180 | 448.177 | 466.181 | 530.322 | 568.236 | 586.817*2 | 677.788*2 | 617.987 | 718.408 | 817.478 | 887.627 |       |
|-------------------------|--------|--------|--------|--------|--------|---------|---------|---------|---------|---------|---------|---------|---------|---------|---------|---------|---------|---------|-----------|-----------|---------|---------|---------|---------|-------|
| Frag. Inten. (% of TIC) | 0.00   | 0.05   | 4.58   | 0.08   | 4.18   | 4.43    | 2.00    | 8.32    | 1.92    | 1.44    | 1.16    | 1.18    | 15.54   | 1.68    | 1.52    | 1.46    | 4.92    | 1.46    | 2.17      | 1.58      | 1.47    | 5.64    | 21.87   | 8.38    | 2.94  |
| Rel. Inten. (% of BP)   | 0.01   | 0.26   | 20.95  | 0.35   | 19.13  | 20.25   | 5.14    | 38.05   | 8.79    | 6.57    | 5.29    | 5.40    | 71.05   | 7.67    | 6.96    | 6.67    | 22.51   | 6.70    | 9.92      | 7.21      | 6.72    | 25.79   | 100.00  | 38.36   | 13.45 |
| Score                   | 0.20   | 0.50   | -0.21  | 0.22   | -0.19  | 0.50    | 1.50    | 0.50    | -0.09   | -0.07   | -0.05   | 1.50    | -0.71   | 1.50    | -0.07   | 0.50    | -0.23   | 1.50    | -0.10     | -0.07     | -0.07   | 1.50    | 1.50    | 1.50    | -0.13 |
| Ion-type                | PR     | V      |        | LI     |        | a1      | y1      | b1      |         |         |         | y2      |         | y3      | b2      |         |         | y4      |           |           | y5      | y6      | y7      |         |       |
| Delta ppm               | 6.8    | 10.0   |        | 10.2   |        | -2.0    | -10.0   | -5.5    |         |         |         | 1.7     |         | 6.8     |         | 19.5    |         | -14.7   |           |           | 8.3     | -1.2    | 1.6     |         |       |

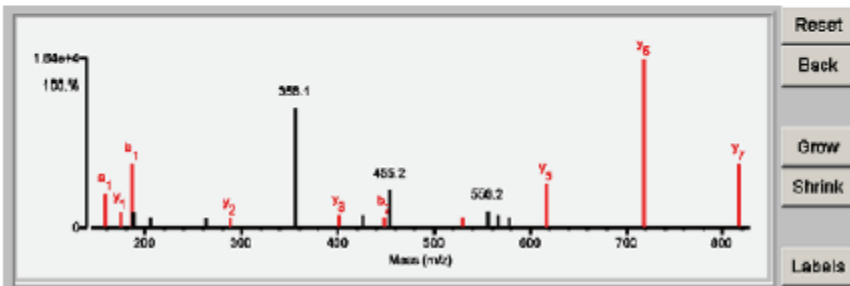



S1

Detailed Results

| Rank                                                                                                                                                                                                                                                                                                                                                                                                                                                                                                                                                                                                                                                                                                                                                                                                                                                                                                                                                                                                                                                                                                                                                                                                                                                                                                                                                                                                                                                                                                                                                                                                                                                                                                                                                                                                                                                                                                                                                                                                                                                                                                                                                                                                                                                                                                                                                                                                                                                                                                           | Score  | SPI (%) | BCS    | # Unmatched Ions | Sequence                                      | MH <sup>+</sup> Calculated (Da) | MH <sup>+</sup> Error (Da) | MH <sup>+</sup> Error (ppm) | Protein MW (Da) | Species | Accession # | MS-Digest Index # | Protein Name                                                          |                       |                   |         |         |         |         |         |         |         |          |          |          |         |         |                       |         |         |         |         |         |         |         |         |          |          |          |                         |      |      |      |      |      |      |      |      |      |      |      |      |      |       |      |      |      |      |      |      |      |      |      |      |      |                       |       |      |       |       |       |       |      |      |       |       |       |       |       |        |       |       |      |       |       |       |      |       |       |      |       |       |       |      |       |       |      |      |      |       |      |      |      |       |      |      |      |       |       |       |       |       |       |       |      |      |       |          |    |  |  |  |                     |    |    |  |    |    |    |    |  |                   |                   |  |  |  |  |  |  |  |     |     |  |           |  |     |  |  |       |      |       |  |       |      |       |  |       |       |      |  |  |  |  |  |  |  |      |     |  |
|----------------------------------------------------------------------------------------------------------------------------------------------------------------------------------------------------------------------------------------------------------------------------------------------------------------------------------------------------------------------------------------------------------------------------------------------------------------------------------------------------------------------------------------------------------------------------------------------------------------------------------------------------------------------------------------------------------------------------------------------------------------------------------------------------------------------------------------------------------------------------------------------------------------------------------------------------------------------------------------------------------------------------------------------------------------------------------------------------------------------------------------------------------------------------------------------------------------------------------------------------------------------------------------------------------------------------------------------------------------------------------------------------------------------------------------------------------------------------------------------------------------------------------------------------------------------------------------------------------------------------------------------------------------------------------------------------------------------------------------------------------------------------------------------------------------------------------------------------------------------------------------------------------------------------------------------------------------------------------------------------------------------------------------------------------------------------------------------------------------------------------------------------------------------------------------------------------------------------------------------------------------------------------------------------------------------------------------------------------------------------------------------------------------------------------------------------------------------------------------------------------------|--------|---------|--------|------------------|-----------------------------------------------|---------------------------------|----------------------------|-----------------------------|-----------------|---------|-------------|-------------------|-----------------------------------------------------------------------|-----------------------|-------------------|---------|---------|---------|---------|---------|---------|---------|----------|----------|----------|---------|---------|-----------------------|---------|---------|---------|---------|---------|---------|---------|---------|----------|----------|----------|-------------------------|------|------|------|------|------|------|------|------|------|------|------|------|------|-------|------|------|------|------|------|------|------|------|------|------|------|-----------------------|-------|------|-------|-------|-------|-------|------|------|-------|-------|-------|-------|-------|--------|-------|-------|------|-------|-------|-------|------|-------|-------|------|-------|-------|-------|------|-------|-------|------|------|------|-------|------|------|------|-------|------|------|------|-------|-------|-------|-------|-------|-------|-------|------|------|-------|----------|----|--|--|--|---------------------|----|----|--|----|----|----|----|--|-------------------|-------------------|--|--|--|--|--|--|--|-----|-----|--|-----------|--|-----|--|--|-------|------|-------|--|-------|------|-------|--|-------|-------|------|--|--|--|--|--|--|--|------|-----|--|
| 1                                                                                                                                                                                                                                                                                                                                                                                                                                                                                                                                                                                                                                                                                                                                                                                                                                                                                                                                                                                                                                                                                                                                                                                                                                                                                                                                                                                                                                                                                                                                                                                                                                                                                                                                                                                                                                                                                                                                                                                                                                                                                                                                                                                                                                                                                                                                                                                                                                                                                                              | 11.64  | 56.3    | 8      | 13/25            | (L) S G I A P Q A S A A D V V V V V E G R (R) | 1708.8435                       | -0.0048                    | -2.8                        | 44292.3/8.76    | HUMAN   | P09110      | 646165            | 3-ketoacyl-CoA thiolase, peroxisomal precursor - Homo sapiens (Human) |                       |                   |         |         |         |         |         |         |         |          |          |          |         |         |                       |         |         |         |         |         |         |         |         |          |          |          |                         |      |      |      |      |      |      |      |      |      |      |      |      |      |       |      |      |      |      |      |      |      |      |      |      |      |                       |       |      |       |       |       |       |      |      |       |       |       |       |       |        |       |       |      |       |       |       |      |       |       |      |       |       |       |      |       |       |      |      |      |       |      |      |      |       |      |      |      |       |       |       |       |       |       |       |      |      |       |          |    |  |  |  |                     |    |    |  |    |    |    |    |  |                   |                   |  |  |  |  |  |  |  |     |     |  |           |  |     |  |  |       |      |       |  |       |      |       |  |       |       |      |  |  |  |  |  |  |  |      |     |  |
| <table border="1"> <thead> <tr> <th>Fragment-Ion (m/z)</th> <th>68.052</th> <th>70.066</th> <th>72.076</th> <th>100.074</th> <th>215.045</th> <th>226.118</th> <th>233.053</th> <th>260.067</th> <th>369.188</th> <th>468.266</th> <th>567.317</th> <th>648.899</th> <th>666.390</th> <th>703.368<sup>+2</sup></th> <th>738.910</th> <th>739.428</th> <th>767.009</th> <th>777.834</th> <th>788.129</th> <th>792.604</th> <th>838.782</th> <th>881.525</th> <th>1109.605</th> <th>1180.647</th> <th>1214.550</th> </tr> </thead> <tbody> <tr> <td>Frac. Inten. (% of TIC)</td> <td>3.50</td> <td>0.00</td> <td>3.09</td> <td>3.44</td> <td>2.75</td> <td>7.06</td> <td>1.95</td> <td>2.02</td> <td>4.36</td> <td>4.08</td> <td>4.73</td> <td>3.32</td> <td>2.34</td> <td>21.25</td> <td>3.16</td> <td>4.18</td> <td>1.92</td> <td>5.98</td> <td>5.61</td> <td>2.48</td> <td>2.12</td> <td>3.74</td> <td>2.54</td> <td>2.07</td> <td>2.30</td> </tr> <tr> <td>Rel. Inten. (% of BP)</td> <td>16.50</td> <td>0.01</td> <td>14.54</td> <td>16.19</td> <td>12.93</td> <td>33.21</td> <td>9.20</td> <td>9.52</td> <td>20.53</td> <td>19.22</td> <td>22.27</td> <td>15.62</td> <td>10.99</td> <td>100.00</td> <td>14.88</td> <td>19.67</td> <td>9.04</td> <td>28.15</td> <td>26.39</td> <td>11.69</td> <td>9.97</td> <td>17.59</td> <td>11.96</td> <td>9.74</td> <td>10.85</td> </tr> <tr> <td>Score</td> <td>-0.16</td> <td>0.20</td> <td>-0.15</td> <td>-0.16</td> <td>0.25</td> <td>0.75</td> <td>0.50</td> <td>-0.10</td> <td>1.50</td> <td>1.50</td> <td>1.50</td> <td>-0.16</td> <td>1.50</td> <td>1.50</td> <td>1.50</td> <td>-0.20</td> <td>-0.09</td> <td>-0.28</td> <td>-0.26</td> <td>-0.12</td> <td>-0.10</td> <td>-0.18</td> <td>1.50</td> <td>1.50</td> <td>-0.11</td> </tr> <tr> <td>Ion-type</td> <td>PR</td> <td></td> <td></td> <td></td> <td>b2-H<sub>2</sub>O</td> <td>PQ</td> <td>b2</td> <td></td> <td>y3</td> <td>y4</td> <td>y5</td> <td>y6</td> <td></td> <td>y14<sup>+2</sup></td> <td>y<sup>++15</sup></td> <td></td> <td></td> <td></td> <td></td> <td></td> <td></td> <td></td> <td>y11</td> <td>y12</td> <td></td> </tr> <tr> <td>Delta ppm</td> <td></td> <td>5.3</td> <td></td> <td></td> <td>-19.5</td> <td>-9.4</td> <td>-30.7</td> <td></td> <td>-31.2</td> <td>-3.5</td> <td>-33.4</td> <td></td> <td>-21.9</td> <td>-18.0</td> <td>13.7</td> <td></td> <td></td> <td></td> <td></td> <td></td> <td></td> <td></td> <td>-0.8</td> <td>3.0</td> <td></td> </tr> </tbody> </table> |        |         |        |                  |                                               |                                 |                            |                             |                 |         |             |                   |                                                                       | Fragment-Ion (m/z)    | 68.052            | 70.066  | 72.076  | 100.074 | 215.045 | 226.118 | 233.053 | 260.067 | 369.188  | 468.266  | 567.317  | 648.899 | 666.390 | 703.368 <sup>+2</sup> | 738.910 | 739.428 | 767.009 | 777.834 | 788.129 | 792.604 | 838.782 | 881.525 | 1109.605 | 1180.647 | 1214.550 | Frac. Inten. (% of TIC) | 3.50 | 0.00 | 3.09 | 3.44 | 2.75 | 7.06 | 1.95 | 2.02 | 4.36 | 4.08 | 4.73 | 3.32 | 2.34 | 21.25 | 3.16 | 4.18 | 1.92 | 5.98 | 5.61 | 2.48 | 2.12 | 3.74 | 2.54 | 2.07 | 2.30 | Rel. Inten. (% of BP) | 16.50 | 0.01 | 14.54 | 16.19 | 12.93 | 33.21 | 9.20 | 9.52 | 20.53 | 19.22 | 22.27 | 15.62 | 10.99 | 100.00 | 14.88 | 19.67 | 9.04 | 28.15 | 26.39 | 11.69 | 9.97 | 17.59 | 11.96 | 9.74 | 10.85 | Score | -0.16 | 0.20 | -0.15 | -0.16 | 0.25 | 0.75 | 0.50 | -0.10 | 1.50 | 1.50 | 1.50 | -0.16 | 1.50 | 1.50 | 1.50 | -0.20 | -0.09 | -0.28 | -0.26 | -0.12 | -0.10 | -0.18 | 1.50 | 1.50 | -0.11 | Ion-type | PR |  |  |  | b2-H <sub>2</sub> O | PQ | b2 |  | y3 | y4 | y5 | y6 |  | y14 <sup>+2</sup> | y <sup>++15</sup> |  |  |  |  |  |  |  | y11 | y12 |  | Delta ppm |  | 5.3 |  |  | -19.5 | -9.4 | -30.7 |  | -31.2 | -3.5 | -33.4 |  | -21.9 | -18.0 | 13.7 |  |  |  |  |  |  |  | -0.8 | 3.0 |  |
| Fragment-Ion (m/z)                                                                                                                                                                                                                                                                                                                                                                                                                                                                                                                                                                                                                                                                                                                                                                                                                                                                                                                                                                                                                                                                                                                                                                                                                                                                                                                                                                                                                                                                                                                                                                                                                                                                                                                                                                                                                                                                                                                                                                                                                                                                                                                                                                                                                                                                                                                                                                                                                                                                                             | 68.052 | 70.066  | 72.076 | 100.074          | 215.045                                       | 226.118                         | 233.053                    | 260.067                     | 369.188         | 468.266 | 567.317     | 648.899           | 666.390                                                               | 703.368 <sup>+2</sup> | 738.910           | 739.428 | 767.009 | 777.834 | 788.129 | 792.604 | 838.782 | 881.525 | 1109.605 | 1180.647 | 1214.550 |         |         |                       |         |         |         |         |         |         |         |         |          |          |          |                         |      |      |      |      |      |      |      |      |      |      |      |      |      |       |      |      |      |      |      |      |      |      |      |      |      |                       |       |      |       |       |       |       |      |      |       |       |       |       |       |        |       |       |      |       |       |       |      |       |       |      |       |       |       |      |       |       |      |      |      |       |      |      |      |       |      |      |      |       |       |       |       |       |       |       |      |      |       |          |    |  |  |  |                     |    |    |  |    |    |    |    |  |                   |                   |  |  |  |  |  |  |  |     |     |  |           |  |     |  |  |       |      |       |  |       |      |       |  |       |       |      |  |  |  |  |  |  |  |      |     |  |
| Frac. Inten. (% of TIC)                                                                                                                                                                                                                                                                                                                                                                                                                                                                                                                                                                                                                                                                                                                                                                                                                                                                                                                                                                                                                                                                                                                                                                                                                                                                                                                                                                                                                                                                                                                                                                                                                                                                                                                                                                                                                                                                                                                                                                                                                                                                                                                                                                                                                                                                                                                                                                                                                                                                                        | 3.50   | 0.00    | 3.09   | 3.44             | 2.75                                          | 7.06                            | 1.95                       | 2.02                        | 4.36            | 4.08    | 4.73        | 3.32              | 2.34                                                                  | 21.25                 | 3.16              | 4.18    | 1.92    | 5.98    | 5.61    | 2.48    | 2.12    | 3.74    | 2.54     | 2.07     | 2.30     |         |         |                       |         |         |         |         |         |         |         |         |          |          |          |                         |      |      |      |      |      |      |      |      |      |      |      |      |      |       |      |      |      |      |      |      |      |      |      |      |      |                       |       |      |       |       |       |       |      |      |       |       |       |       |       |        |       |       |      |       |       |       |      |       |       |      |       |       |       |      |       |       |      |      |      |       |      |      |      |       |      |      |      |       |       |       |       |       |       |       |      |      |       |          |    |  |  |  |                     |    |    |  |    |    |    |    |  |                   |                   |  |  |  |  |  |  |  |     |     |  |           |  |     |  |  |       |      |       |  |       |      |       |  |       |       |      |  |  |  |  |  |  |  |      |     |  |
| Rel. Inten. (% of BP)                                                                                                                                                                                                                                                                                                                                                                                                                                                                                                                                                                                                                                                                                                                                                                                                                                                                                                                                                                                                                                                                                                                                                                                                                                                                                                                                                                                                                                                                                                                                                                                                                                                                                                                                                                                                                                                                                                                                                                                                                                                                                                                                                                                                                                                                                                                                                                                                                                                                                          | 16.50  | 0.01    | 14.54  | 16.19            | 12.93                                         | 33.21                           | 9.20                       | 9.52                        | 20.53           | 19.22   | 22.27       | 15.62             | 10.99                                                                 | 100.00                | 14.88             | 19.67   | 9.04    | 28.15   | 26.39   | 11.69   | 9.97    | 17.59   | 11.96    | 9.74     | 10.85    |         |         |                       |         |         |         |         |         |         |         |         |          |          |          |                         |      |      |      |      |      |      |      |      |      |      |      |      |      |       |      |      |      |      |      |      |      |      |      |      |      |                       |       |      |       |       |       |       |      |      |       |       |       |       |       |        |       |       |      |       |       |       |      |       |       |      |       |       |       |      |       |       |      |      |      |       |      |      |      |       |      |      |      |       |       |       |       |       |       |       |      |      |       |          |    |  |  |  |                     |    |    |  |    |    |    |    |  |                   |                   |  |  |  |  |  |  |  |     |     |  |           |  |     |  |  |       |      |       |  |       |      |       |  |       |       |      |  |  |  |  |  |  |  |      |     |  |
| Score                                                                                                                                                                                                                                                                                                                                                                                                                                                                                                                                                                                                                                                                                                                                                                                                                                                                                                                                                                                                                                                                                                                                                                                                                                                                                                                                                                                                                                                                                                                                                                                                                                                                                                                                                                                                                                                                                                                                                                                                                                                                                                                                                                                                                                                                                                                                                                                                                                                                                                          | -0.16  | 0.20    | -0.15  | -0.16            | 0.25                                          | 0.75                            | 0.50                       | -0.10                       | 1.50            | 1.50    | 1.50        | -0.16             | 1.50                                                                  | 1.50                  | 1.50              | -0.20   | -0.09   | -0.28   | -0.26   | -0.12   | -0.10   | -0.18   | 1.50     | 1.50     | -0.11    |         |         |                       |         |         |         |         |         |         |         |         |          |          |          |                         |      |      |      |      |      |      |      |      |      |      |      |      |      |       |      |      |      |      |      |      |      |      |      |      |      |                       |       |      |       |       |       |       |      |      |       |       |       |       |       |        |       |       |      |       |       |       |      |       |       |      |       |       |       |      |       |       |      |      |      |       |      |      |      |       |      |      |      |       |       |       |       |       |       |       |      |      |       |          |    |  |  |  |                     |    |    |  |    |    |    |    |  |                   |                   |  |  |  |  |  |  |  |     |     |  |           |  |     |  |  |       |      |       |  |       |      |       |  |       |       |      |  |  |  |  |  |  |  |      |     |  |
| Ion-type                                                                                                                                                                                                                                                                                                                                                                                                                                                                                                                                                                                                                                                                                                                                                                                                                                                                                                                                                                                                                                                                                                                                                                                                                                                                                                                                                                                                                                                                                                                                                                                                                                                                                                                                                                                                                                                                                                                                                                                                                                                                                                                                                                                                                                                                                                                                                                                                                                                                                                       | PR     |         |        |                  | b2-H <sub>2</sub> O                           | PQ                              | b2                         |                             | y3              | y4      | y5          | y6                |                                                                       | y14 <sup>+2</sup>     | y <sup>++15</sup> |         |         |         |         |         |         |         | y11      | y12      |          |         |         |                       |         |         |         |         |         |         |         |         |          |          |          |                         |      |      |      |      |      |      |      |      |      |      |      |      |      |       |      |      |      |      |      |      |      |      |      |      |      |                       |       |      |       |       |       |       |      |      |       |       |       |       |       |        |       |       |      |       |       |       |      |       |       |      |       |       |       |      |       |       |      |      |      |       |      |      |      |       |      |      |      |       |       |       |       |       |       |       |      |      |       |          |    |  |  |  |                     |    |    |  |    |    |    |    |  |                   |                   |  |  |  |  |  |  |  |     |     |  |           |  |     |  |  |       |      |       |  |       |      |       |  |       |       |      |  |  |  |  |  |  |  |      |     |  |
| Delta ppm                                                                                                                                                                                                                                                                                                                                                                                                                                                                                                                                                                                                                                                                                                                                                                                                                                                                                                                                                                                                                                                                                                                                                                                                                                                                                                                                                                                                                                                                                                                                                                                                                                                                                                                                                                                                                                                                                                                                                                                                                                                                                                                                                                                                                                                                                                                                                                                                                                                                                                      |        | 5.3     |        |                  | -19.5                                         | -9.4                            | -30.7                      |                             | -31.2           | -3.5    | -33.4       |                   | -21.9                                                                 | -18.0                 | 13.7              |         |         |         |         |         |         |         | -0.8     | 3.0      |          |         |         |                       |         |         |         |         |         |         |         |         |          |          |          |                         |      |      |      |      |      |      |      |      |      |      |      |      |      |       |      |      |      |      |      |      |      |      |      |      |      |                       |       |      |       |       |       |       |      |      |       |       |       |       |       |        |       |       |      |       |       |       |      |       |       |      |       |       |       |      |       |       |      |      |      |       |      |      |      |       |      |      |      |       |       |       |       |       |       |       |      |      |       |          |    |  |  |  |                     |    |    |  |    |    |    |    |  |                   |                   |  |  |  |  |  |  |  |     |     |  |           |  |     |  |  |       |      |       |  |       |      |       |  |       |       |      |  |  |  |  |  |  |  |      |     |  |

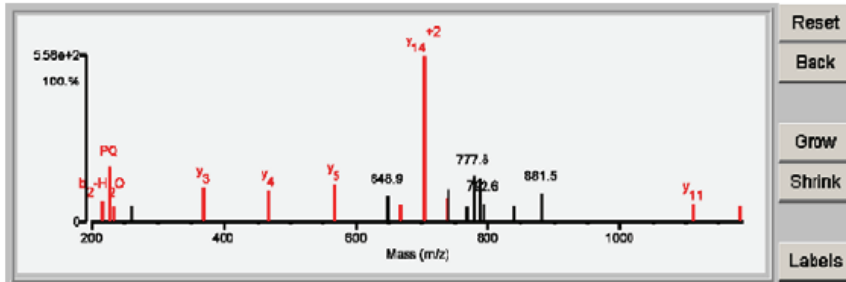

S2

Detailed Results

| Rank                                                                                                                                                                                                                                                                                                                                                                                                                                                                                                                                                                                                                                                                                                                                                                                                                                                                                                                                                                                                                                                                                                                                                                                                                                                                                                                                                                                                                                                                                                                                                                                                                                                                                                                                                                                                                                                                                                                                                                                                                                                                                                                                                                                                                                                                                                                                                                                                                                                                                                                                                                                                                                                    | Score  | SPI (%) | BCS     | # Unmatched Ions | Sequence                                    | MH <sup>+</sup> Calculated (Da) | MH <sup>+</sup> Error (Da) | MH <sup>+</sup> Error (ppm) | Protein MW (Da) | Species | Accession # | MS-Digest Index # | Protein Name                                                         |                    |                                    |                       |         |                       |         |                     |         |         |         |          |          |         |                       |         |                       |                       |         |                       |         |         |         |         |         |          |          |                         |      |      |      |      |      |      |      |      |      |      |      |      |      |      |      |       |      |      |      |      |      |      |      |      |      |                       |      |      |      |      |      |      |      |      |      |      |      |      |      |      |      |        |      |      |      |      |      |      |      |       |      |       |      |      |       |      |      |      |      |      |      |      |      |      |      |      |      |      |      |      |      |      |      |      |      |      |      |          |    |    |  |    |        |     |    |                       |      |    |    |    |                   |    |                                    |                   |    |                   |    |                     |    |    |    |     |     |           |      |     |  |     |      |      |     |      |       |       |      |      |     |     |     |     |      |     |     |      |     |      |      |      |      |
|---------------------------------------------------------------------------------------------------------------------------------------------------------------------------------------------------------------------------------------------------------------------------------------------------------------------------------------------------------------------------------------------------------------------------------------------------------------------------------------------------------------------------------------------------------------------------------------------------------------------------------------------------------------------------------------------------------------------------------------------------------------------------------------------------------------------------------------------------------------------------------------------------------------------------------------------------------------------------------------------------------------------------------------------------------------------------------------------------------------------------------------------------------------------------------------------------------------------------------------------------------------------------------------------------------------------------------------------------------------------------------------------------------------------------------------------------------------------------------------------------------------------------------------------------------------------------------------------------------------------------------------------------------------------------------------------------------------------------------------------------------------------------------------------------------------------------------------------------------------------------------------------------------------------------------------------------------------------------------------------------------------------------------------------------------------------------------------------------------------------------------------------------------------------------------------------------------------------------------------------------------------------------------------------------------------------------------------------------------------------------------------------------------------------------------------------------------------------------------------------------------------------------------------------------------------------------------------------------------------------------------------------------------|--------|---------|---------|------------------|---------------------------------------------|---------------------------------|----------------------------|-----------------------------|-----------------|---------|-------------|-------------------|----------------------------------------------------------------------|--------------------|------------------------------------|-----------------------|---------|-----------------------|---------|---------------------|---------|---------|---------|----------|----------|---------|-----------------------|---------|-----------------------|-----------------------|---------|-----------------------|---------|---------|---------|---------|---------|----------|----------|-------------------------|------|------|------|------|------|------|------|------|------|------|------|------|------|------|------|-------|------|------|------|------|------|------|------|------|------|-----------------------|------|------|------|------|------|------|------|------|------|------|------|------|------|------|------|--------|------|------|------|------|------|------|------|-------|------|-------|------|------|-------|------|------|------|------|------|------|------|------|------|------|------|------|------|------|------|------|------|------|------|------|------|------|----------|----|----|--|----|--------|-----|----|-----------------------|------|----|----|----|-------------------|----|------------------------------------|-------------------|----|-------------------|----|---------------------|----|----|----|-----|-----|-----------|------|-----|--|-----|------|------|-----|------|-------|-------|------|------|-----|-----|-----|-----|------|-----|-----|------|-----|------|------|------|------|
| 1                                                                                                                                                                                                                                                                                                                                                                                                                                                                                                                                                                                                                                                                                                                                                                                                                                                                                                                                                                                                                                                                                                                                                                                                                                                                                                                                                                                                                                                                                                                                                                                                                                                                                                                                                                                                                                                                                                                                                                                                                                                                                                                                                                                                                                                                                                                                                                                                                                                                                                                                                                                                                                                       | 22.80  | 98.2    | 10      | 1/26             | (S) D A K P I P L I T I L V S G I Q D R (V) | 1672.7386                       | 0.0048                     | 3.1                         | 17417.4/4.82    | HUMAN   | Q14681      | 7451              | Acyl carrier protein, mitochondrial precursor - Homo sapiens (Human) |                    |                                    |                       |         |                       |         |                     |         |         |         |          |          |         |                       |         |                       |                       |         |                       |         |         |         |         |         |          |          |                         |      |      |      |      |      |      |      |      |      |      |      |      |      |      |      |       |      |      |      |      |      |      |      |      |      |                       |      |      |      |      |      |      |      |      |      |      |      |      |      |      |      |        |      |      |      |      |      |      |      |       |      |       |      |      |       |      |      |      |      |      |      |      |      |      |      |      |      |      |      |      |      |      |      |      |      |      |      |          |    |    |  |    |        |     |    |                       |      |    |    |    |                   |    |                                    |                   |    |                   |    |                     |    |    |    |     |     |           |      |     |  |     |      |      |     |      |       |       |      |      |     |     |     |     |      |     |     |      |     |      |      |      |      |
| <table border="1"> <thead> <tr> <th>Fragment-Ion (m/z)</th> <th>70.087</th> <th>85.097</th> <th>104.063</th> <th>176.119</th> <th>280.201</th> <th>308.198</th> <th>336.078</th> <th>391.283</th> <th>408.240</th> <th>418.188</th> <th>432.128</th> <th>529.176</th> <th>571.318<sup>+2</sup></th> <th>688.312</th> <th>810.837<sup>+2</sup></th> <th>819.841<sup>+2</sup></th> <th>842.268</th> <th>885.386<sup>+2</sup></th> <th>717.363</th> <th>726.296</th> <th>743.313</th> <th>830.434</th> <th>881.478</th> <th>1141.816</th> <th>1238.888</th> </tr> </thead> <tbody> <tr> <td>Frac. Inten. (% of TIC)</td> <td>0.00</td> <td>0.03</td> <td>3.52</td> <td>1.03</td> <td>0.99</td> <td>1.08</td> <td>1.75</td> <td>0.97</td> <td>1.38</td> <td>2.23</td> <td>2.29</td> <td>1.53</td> <td>1.18</td> <td>2.48</td> <td>2.33</td> <td>52.95</td> <td>0.84</td> <td>3.53</td> <td>2.44</td> <td>0.88</td> <td>1.31</td> <td>3.66</td> <td>3.62</td> <td>5.65</td> <td>2.11</td> </tr> <tr> <td>Rel. Inten. (% of BP)</td> <td>0.01</td> <td>0.06</td> <td>7.23</td> <td>1.95</td> <td>1.88</td> <td>2.04</td> <td>3.31</td> <td>1.83</td> <td>2.61</td> <td>4.22</td> <td>4.33</td> <td>2.90</td> <td>2.23</td> <td>4.69</td> <td>4.41</td> <td>100.00</td> <td>1.99</td> <td>6.58</td> <td>4.62</td> <td>1.67</td> <td>2.47</td> <td>6.92</td> <td>6.84</td> <td>10.69</td> <td>3.99</td> </tr> <tr> <td>Score</td> <td>0.20</td> <td>0.22</td> <td>-0.07</td> <td>1.50</td> <td>0.50</td> <td>0.75</td> <td>0.50</td> <td>0.50</td> <td>0.50</td> <td>1.50</td> <td>0.50</td> <td>0.50</td> <td>1.50</td> <td>1.50</td> <td>1.50</td> <td>1.50</td> <td>0.50</td> <td>1.50</td> <td>1.50</td> <td>0.25</td> <td>0.50</td> <td>1.50</td> <td>1.50</td> <td>1.50</td> <td>1.50</td> </tr> <tr> <td>Ion-type</td> <td>PR</td> <td>LI</td> <td></td> <td>y1</td> <td>PPL-28</td> <td>PPL</td> <td>b2</td> <td>PPLT-H<sub>2</sub>O</td> <td>PPLT</td> <td>y8</td> <td>b5</td> <td>b4</td> <td>y10<sup>+2</sup></td> <td>y5</td> <td>y11-H<sub>2</sub>O<sup>+2</sup></td> <td>y11<sup>+2</sup></td> <td>b5</td> <td>y12<sup>+2</sup></td> <td>y6</td> <td>b6-H<sub>2</sub>O</td> <td>b6</td> <td>y7</td> <td>y8</td> <td>y10</td> <td>y11</td> </tr> <tr> <td>Delta ppm</td> <td>22.5</td> <td>4.3</td> <td></td> <td>1.4</td> <td>-7.3</td> <td>-6.4</td> <td>4.8</td> <td>-5.1</td> <td>-14.5</td> <td>-15.5</td> <td>-2.4</td> <td>-8.3</td> <td>2.8</td> <td>2.7</td> <td>2.3</td> <td>1.3</td> <td>-7.9</td> <td>5.1</td> <td>0.0</td> <td>-1.8</td> <td>1.8</td> <td>-3.7</td> <td>-5.6</td> <td>-5.1</td> <td>-5.2</td> </tr> </tbody> </table> |        |         |         |                  |                                             |                                 |                            |                             |                 |         |             |                   |                                                                      | Fragment-Ion (m/z) | 70.087                             | 85.097                | 104.063 | 176.119               | 280.201 | 308.198             | 336.078 | 391.283 | 408.240 | 418.188  | 432.128  | 529.176 | 571.318 <sup>+2</sup> | 688.312 | 810.837 <sup>+2</sup> | 819.841 <sup>+2</sup> | 842.268 | 885.386 <sup>+2</sup> | 717.363 | 726.296 | 743.313 | 830.434 | 881.478 | 1141.816 | 1238.888 | Frac. Inten. (% of TIC) | 0.00 | 0.03 | 3.52 | 1.03 | 0.99 | 1.08 | 1.75 | 0.97 | 1.38 | 2.23 | 2.29 | 1.53 | 1.18 | 2.48 | 2.33 | 52.95 | 0.84 | 3.53 | 2.44 | 0.88 | 1.31 | 3.66 | 3.62 | 5.65 | 2.11 | Rel. Inten. (% of BP) | 0.01 | 0.06 | 7.23 | 1.95 | 1.88 | 2.04 | 3.31 | 1.83 | 2.61 | 4.22 | 4.33 | 2.90 | 2.23 | 4.69 | 4.41 | 100.00 | 1.99 | 6.58 | 4.62 | 1.67 | 2.47 | 6.92 | 6.84 | 10.69 | 3.99 | Score | 0.20 | 0.22 | -0.07 | 1.50 | 0.50 | 0.75 | 0.50 | 0.50 | 0.50 | 1.50 | 0.50 | 0.50 | 1.50 | 1.50 | 1.50 | 1.50 | 0.50 | 1.50 | 1.50 | 0.25 | 0.50 | 1.50 | 1.50 | 1.50 | 1.50 | Ion-type | PR | LI |  | y1 | PPL-28 | PPL | b2 | PPLT-H <sub>2</sub> O | PPLT | y8 | b5 | b4 | y10 <sup>+2</sup> | y5 | y11-H <sub>2</sub> O <sup>+2</sup> | y11 <sup>+2</sup> | b5 | y12 <sup>+2</sup> | y6 | b6-H <sub>2</sub> O | b6 | y7 | y8 | y10 | y11 | Delta ppm | 22.5 | 4.3 |  | 1.4 | -7.3 | -6.4 | 4.8 | -5.1 | -14.5 | -15.5 | -2.4 | -8.3 | 2.8 | 2.7 | 2.3 | 1.3 | -7.9 | 5.1 | 0.0 | -1.8 | 1.8 | -3.7 | -5.6 | -5.1 | -5.2 |
| Fragment-Ion (m/z)                                                                                                                                                                                                                                                                                                                                                                                                                                                                                                                                                                                                                                                                                                                                                                                                                                                                                                                                                                                                                                                                                                                                                                                                                                                                                                                                                                                                                                                                                                                                                                                                                                                                                                                                                                                                                                                                                                                                                                                                                                                                                                                                                                                                                                                                                                                                                                                                                                                                                                                                                                                                                                      | 70.087 | 85.097  | 104.063 | 176.119          | 280.201                                     | 308.198                         | 336.078                    | 391.283                     | 408.240         | 418.188 | 432.128     | 529.176           | 571.318 <sup>+2</sup>                                                | 688.312            | 810.837 <sup>+2</sup>              | 819.841 <sup>+2</sup> | 842.268 | 885.386 <sup>+2</sup> | 717.363 | 726.296             | 743.313 | 830.434 | 881.478 | 1141.816 | 1238.888 |         |                       |         |                       |                       |         |                       |         |         |         |         |         |          |          |                         |      |      |      |      |      |      |      |      |      |      |      |      |      |      |      |       |      |      |      |      |      |      |      |      |      |                       |      |      |      |      |      |      |      |      |      |      |      |      |      |      |      |        |      |      |      |      |      |      |      |       |      |       |      |      |       |      |      |      |      |      |      |      |      |      |      |      |      |      |      |      |      |      |      |      |      |      |      |          |    |    |  |    |        |     |    |                       |      |    |    |    |                   |    |                                    |                   |    |                   |    |                     |    |    |    |     |     |           |      |     |  |     |      |      |     |      |       |       |      |      |     |     |     |     |      |     |     |      |     |      |      |      |      |
| Frac. Inten. (% of TIC)                                                                                                                                                                                                                                                                                                                                                                                                                                                                                                                                                                                                                                                                                                                                                                                                                                                                                                                                                                                                                                                                                                                                                                                                                                                                                                                                                                                                                                                                                                                                                                                                                                                                                                                                                                                                                                                                                                                                                                                                                                                                                                                                                                                                                                                                                                                                                                                                                                                                                                                                                                                                                                 | 0.00   | 0.03    | 3.52    | 1.03             | 0.99                                        | 1.08                            | 1.75                       | 0.97                        | 1.38            | 2.23    | 2.29        | 1.53              | 1.18                                                                 | 2.48               | 2.33                               | 52.95                 | 0.84    | 3.53                  | 2.44    | 0.88                | 1.31    | 3.66    | 3.62    | 5.65     | 2.11     |         |                       |         |                       |                       |         |                       |         |         |         |         |         |          |          |                         |      |      |      |      |      |      |      |      |      |      |      |      |      |      |      |       |      |      |      |      |      |      |      |      |      |                       |      |      |      |      |      |      |      |      |      |      |      |      |      |      |      |        |      |      |      |      |      |      |      |       |      |       |      |      |       |      |      |      |      |      |      |      |      |      |      |      |      |      |      |      |      |      |      |      |      |      |      |          |    |    |  |    |        |     |    |                       |      |    |    |    |                   |    |                                    |                   |    |                   |    |                     |    |    |    |     |     |           |      |     |  |     |      |      |     |      |       |       |      |      |     |     |     |     |      |     |     |      |     |      |      |      |      |
| Rel. Inten. (% of BP)                                                                                                                                                                                                                                                                                                                                                                                                                                                                                                                                                                                                                                                                                                                                                                                                                                                                                                                                                                                                                                                                                                                                                                                                                                                                                                                                                                                                                                                                                                                                                                                                                                                                                                                                                                                                                                                                                                                                                                                                                                                                                                                                                                                                                                                                                                                                                                                                                                                                                                                                                                                                                                   | 0.01   | 0.06    | 7.23    | 1.95             | 1.88                                        | 2.04                            | 3.31                       | 1.83                        | 2.61            | 4.22    | 4.33        | 2.90              | 2.23                                                                 | 4.69               | 4.41                               | 100.00                | 1.99    | 6.58                  | 4.62    | 1.67                | 2.47    | 6.92    | 6.84    | 10.69    | 3.99     |         |                       |         |                       |                       |         |                       |         |         |         |         |         |          |          |                         |      |      |      |      |      |      |      |      |      |      |      |      |      |      |      |       |      |      |      |      |      |      |      |      |      |                       |      |      |      |      |      |      |      |      |      |      |      |      |      |      |      |        |      |      |      |      |      |      |      |       |      |       |      |      |       |      |      |      |      |      |      |      |      |      |      |      |      |      |      |      |      |      |      |      |      |      |      |          |    |    |  |    |        |     |    |                       |      |    |    |    |                   |    |                                    |                   |    |                   |    |                     |    |    |    |     |     |           |      |     |  |     |      |      |     |      |       |       |      |      |     |     |     |     |      |     |     |      |     |      |      |      |      |
| Score                                                                                                                                                                                                                                                                                                                                                                                                                                                                                                                                                                                                                                                                                                                                                                                                                                                                                                                                                                                                                                                                                                                                                                                                                                                                                                                                                                                                                                                                                                                                                                                                                                                                                                                                                                                                                                                                                                                                                                                                                                                                                                                                                                                                                                                                                                                                                                                                                                                                                                                                                                                                                                                   | 0.20   | 0.22    | -0.07   | 1.50             | 0.50                                        | 0.75                            | 0.50                       | 0.50                        | 0.50            | 1.50    | 0.50        | 0.50              | 1.50                                                                 | 1.50               | 1.50                               | 1.50                  | 0.50    | 1.50                  | 1.50    | 0.25                | 0.50    | 1.50    | 1.50    | 1.50     | 1.50     |         |                       |         |                       |                       |         |                       |         |         |         |         |         |          |          |                         |      |      |      |      |      |      |      |      |      |      |      |      |      |      |      |       |      |      |      |      |      |      |      |      |      |                       |      |      |      |      |      |      |      |      |      |      |      |      |      |      |      |        |      |      |      |      |      |      |      |       |      |       |      |      |       |      |      |      |      |      |      |      |      |      |      |      |      |      |      |      |      |      |      |      |      |      |      |          |    |    |  |    |        |     |    |                       |      |    |    |    |                   |    |                                    |                   |    |                   |    |                     |    |    |    |     |     |           |      |     |  |     |      |      |     |      |       |       |      |      |     |     |     |     |      |     |     |      |     |      |      |      |      |
| Ion-type                                                                                                                                                                                                                                                                                                                                                                                                                                                                                                                                                                                                                                                                                                                                                                                                                                                                                                                                                                                                                                                                                                                                                                                                                                                                                                                                                                                                                                                                                                                                                                                                                                                                                                                                                                                                                                                                                                                                                                                                                                                                                                                                                                                                                                                                                                                                                                                                                                                                                                                                                                                                                                                | PR     | LI      |         | y1               | PPL-28                                      | PPL                             | b2                         | PPLT-H <sub>2</sub> O       | PPLT            | y8      | b5          | b4                | y10 <sup>+2</sup>                                                    | y5                 | y11-H <sub>2</sub> O <sup>+2</sup> | y11 <sup>+2</sup>     | b5      | y12 <sup>+2</sup>     | y6      | b6-H <sub>2</sub> O | b6      | y7      | y8      | y10      | y11      |         |                       |         |                       |                       |         |                       |         |         |         |         |         |          |          |                         |      |      |      |      |      |      |      |      |      |      |      |      |      |      |      |       |      |      |      |      |      |      |      |      |      |                       |      |      |      |      |      |      |      |      |      |      |      |      |      |      |      |        |      |      |      |      |      |      |      |       |      |       |      |      |       |      |      |      |      |      |      |      |      |      |      |      |      |      |      |      |      |      |      |      |      |      |      |          |    |    |  |    |        |     |    |                       |      |    |    |    |                   |    |                                    |                   |    |                   |    |                     |    |    |    |     |     |           |      |     |  |     |      |      |     |      |       |       |      |      |     |     |     |     |      |     |     |      |     |      |      |      |      |
| Delta ppm                                                                                                                                                                                                                                                                                                                                                                                                                                                                                                                                                                                                                                                                                                                                                                                                                                                                                                                                                                                                                                                                                                                                                                                                                                                                                                                                                                                                                                                                                                                                                                                                                                                                                                                                                                                                                                                                                                                                                                                                                                                                                                                                                                                                                                                                                                                                                                                                                                                                                                                                                                                                                                               | 22.5   | 4.3     |         | 1.4              | -7.3                                        | -6.4                            | 4.8                        | -5.1                        | -14.5           | -15.5   | -2.4        | -8.3              | 2.8                                                                  | 2.7                | 2.3                                | 1.3                   | -7.9    | 5.1                   | 0.0     | -1.8                | 1.8     | -3.7    | -5.6    | -5.1     | -5.2     |         |                       |         |                       |                       |         |                       |         |         |         |         |         |          |          |                         |      |      |      |      |      |      |      |      |      |      |      |      |      |      |      |       |      |      |      |      |      |      |      |      |      |                       |      |      |      |      |      |      |      |      |      |      |      |      |      |      |      |        |      |      |      |      |      |      |      |       |      |       |      |      |       |      |      |      |      |      |      |      |      |      |      |      |      |      |      |      |      |      |      |      |      |      |      |          |    |    |  |    |        |     |    |                       |      |    |    |    |                   |    |                                    |                   |    |                   |    |                     |    |    |    |     |     |           |      |     |  |     |      |      |     |      |       |       |      |      |     |     |     |     |      |     |     |      |     |      |      |      |      |

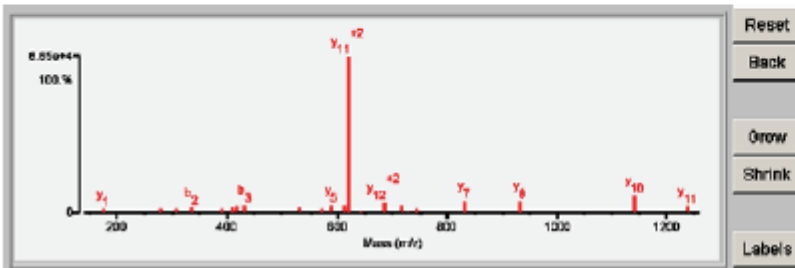



S3

Detailed Results

| Rank                    | Score  | SP1 (%) | BC3     | # Unmatched Ions | Sequence                             | MH <sup>+</sup> Calculated (Da) | MH <sup>+</sup> Error (Da) | MH <sup>+</sup> Error (ppm) | Protein MW (Da) | Species | Accession # | MS-Digest Index #                 | Protein Name                                                               |         |         |         |         |         |                       |         |         |          |          |          |          |
|-------------------------|--------|---------|---------|------------------|--------------------------------------|---------------------------------|----------------------------|-----------------------------|-----------------|---------|-------------|-----------------------------------|----------------------------------------------------------------------------|---------|---------|---------|---------|---------|-----------------------|---------|---------|----------|----------|----------|----------|
| 1                       | 15.88  | 89.7    | 11      | 10/25            | (Q)K I/T/G T/A/E/M/S/S I/L/E/E/R (I) | 1774.7808                       | 0.0085                     | 4.8                         | 68760.89.18     | HUMAN   | P26706      | 44288                             | ATP synthase subunit alpha, mitochondrial precursor - Homo sapiens (Human) |         |         |         |         |         |                       |         |         |          |          |          |          |
| Fragment-Ion (m/z)      | 84.083 | 175.122 | 259.083 | 304.183          | 352.111                              | 388.118                         | 433.189                    | 480.188                     | 518.185         | 548.296 | 671.204     | 688.277                           | 703.338 <sup>+2</sup>                                                      | 712.350 | 718.281 | 748.402 | 832.878 | 833.438 | 848.443 <sup>+2</sup> | 868.159 | 884.473 | 1083.620 | 1184.648 | 1322.820 | 1428.868 |
| Frac. Inten. (% of TIC) | 2.58   | 3.04    | 2.60    | 4.71             | 3.53                                 | 2.62                            | 3.11                       | 2.50                        | 2.78            | 5.51    | 4.55        | 2.48                              | 3.85                                                                       | 6.38    | 3.75    | 4.47    | 3.43    | 7.84    | 2.68                  | 2.79    | 5.64    | 6.55     | 6.23     | 3.63     | 2.65     |
| Rel. Inten. (% of BP)   | 34.12  | 38.71   | 33.12   | 60.11            | 45.02                                | 33.38                           | 39.66                      | 31.88                       | 35.48           | 70.30   | 57.57       | 31.61                             | 49.21                                                                      | 81.35   | 47.79   | 57.01   | 43.77   | 100.00  | 34.11                 | 35.62   | 71.94   | 83.46    | 79.47    | 46.31    | 33.81    |
| Score                   | -0.34  | 1.50    | -0.33   | 1.50             | 0.50                                 | -0.33                           | 1.50                       | 0.75                        | -0.35           | 1.50    | -0.58       | -0.32                             | 0.50                                                                       | 1.50    | -0.48   | 1.50    | -0.44   | 1.50    | -0.34                 | -0.36   | 1.50    | 1.50     | 1.50     | 1.50     | 1.50     |
| Ion-type                |        | Y1      |         | Y2               | b1                                   |                                 | Y3                         | TGTAE                       |                 | Y4      |             | Y1S <sup>+2</sup> O <sup>+2</sup> | Y <sup>+13</sup>                                                           |         | Y8      |         | Y7      |         | Y6                    |         | Y9      | Y10      | Y12      | Y13      |          |
| Delta ppm               |        | 15.7    |         | 6.1              | -13.0                                |                                 | -11.2                      | -14.3                       |                 | 12.4    |             | 4.1                               | 13.5                                                                       |         | -2.9    |         | 0.1     |         | -3.4                  |         | 0.8     | -7.3     | -4.3     | -12.4    |          |

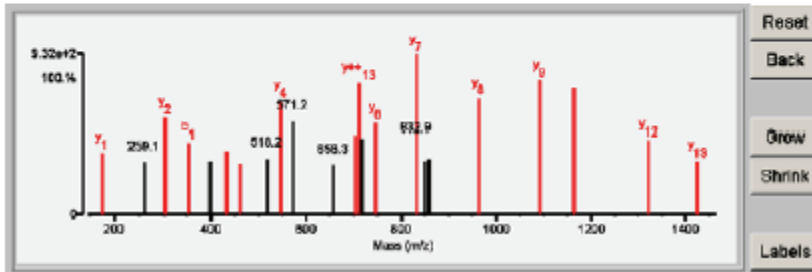

S4

Detailed Results

| Rank                    | Score  | SP1 (%) | BC3    | # Unmatched Ions | Sequence                       | MH <sup>+</sup> Calculated (Da) | MH <sup>+</sup> Error (Da) | MH <sup>+</sup> Error (ppm) | Protein MW (Da) | Species | Accession #      | MS-Digest Index #     | Protein Name                                                           |                       |                       |                       |                       |         |         |         |         |         |          |          |          |
|-------------------------|--------|---------|--------|------------------|--------------------------------|---------------------------------|----------------------------|-----------------------------|-----------------|---------|------------------|-----------------------|------------------------------------------------------------------------|-----------------------|-----------------------|-----------------------|-----------------------|---------|---------|---------|---------|---------|----------|----------|----------|
| 1                       | 11.89  | 70.7    | 4      | 12/26            | (P)Y/P/P L/P E/Y G/G E V/R (Y) | 1584.7545                       | 0.0028                     | 1.8                         | 28908.99.37     | HUMAN   | P24638           | 39487                 | ATP synthase subunit b, mitochondrial precursor - Homo sapiens (Human) |                       |                       |                       |                       |         |         |         |         |         |          |          |          |
| Fragment-Ion (m/z)      | 70.085 | 72.081  | 86.086 | 180.078          | 175.118                        | 233.090                         | 278.114                    | 280.188                     | 285.126         | 308.184 | 474.214          | 620.751 <sup>+2</sup> | 808.838                                                                | 807.842 <sup>+2</sup> | 825.813 <sup>+2</sup> | 827.818 <sup>+2</sup> | 867.347 <sup>+2</sup> | 874.343 | 878.822 | 868.478 | 806.478 | 847.425 | 1040.488 | 1116.819 | 1260.827 |
| Frac. Inten. (% of TIC) | 0.00   | 0.01    | 0.03   | 0.38             | 0.34                           | 0.42                            | 0.55                       | 0.50                        | 0.56            | 3.83    | 0.42             | 0.96                  | 14.09                                                                  | 3.15                  | 0.42                  | 6.50                  | 0.90                  | 60.20   | 0.65    | 0.78    | 1.07    | 0.41    | 2.69     | 0.34     | 0.82     |
| Rel. Inten. (% of BP)   | 0.00   | 0.02    | 0.05   | 0.62             | 0.57                           | 0.70                            | 0.91                       | 0.83                        | 0.94            | 6.36    | 0.69             | 1.59                  | 23.41                                                                  | 5.23                  | 0.69                  | 10.80                 | 1.50                  | 100.00  | 1.09    | 1.29    | 1.77    | 0.67    | 4.45     | 0.57     | 1.36     |
| Score                   | 0.20   | 0.50    | 0.22   | 0.50             | 1.50                           | -0.01                           | -0.01                      | 0.50                        | 0.50            | 0.75    | -0.01            | 1.50                  | -0.23                                                                  | -0.05                 | -0.11                 | -0.01                 | -0.01                 | 1.50    | -0.01   | -0.01   | -0.02   | -0.01   | 1.50     | -0.01    | 1.50     |
| Ion-type                | PR     | V       | LI     | a1               | Y1                             |                                 | PLP-28                     | b2                          | PLP             |         | Y8 <sup>+2</sup> | Y10 <sup>+2</sup>     | Y <sup>+11</sup>                                                       |                       | Y10 <sup>+2</sup>     | Y <sup>+11</sup>      |                       | Y8      |         | Y8      | Y9      | Y10     | Y10      | Y10      | Y10      |
| Delta ppm               | -1.8   | 8.7     | -15.4  | -23.5            | -17.4                          |                                 | -17.7                      | -9.2                        | -13.8           |         | -3.7             | -12.9                 |                                                                        |                       |                       |                       |                       | -6.3    |         |         |         |         | -11.4    |          | -6.6     |

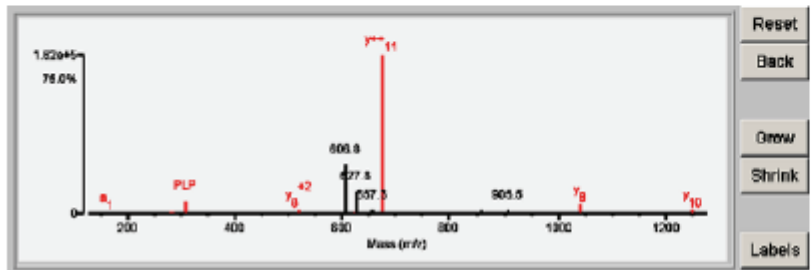

# S5

## Detailed Results

| Rank | Score | SPI (%) | BCS | # Unmatched Ions | Sequence                              | MH <sup>+</sup> Calculated (Da) | MH <sup>+</sup> Error (Da) | MH <sup>+</sup> Error (ppm) | Protein MW/pt (Da) | Species | Accession # | MS-Digest Index # | Protein Name                                                              |
|------|-------|---------|-----|------------------|---------------------------------------|---------------------------------|----------------------------|-----------------------------|--------------------|---------|-------------|-------------------|---------------------------------------------------------------------------|
| 1    | 14.69 | 75.2    | 9   | 10/25            | (A) A/G/S/R/P R/P K/A/G A/A/P G R (I) | 1622.7414                       | 0.0026                     | 1.6                         | 56568.215.26       | HUMAN   | P06576      | 45895             | ATP synthase subunit beta, mitochondrial precursor - Homo sapiens (Human) |

  

| Fragment-Ion (m/z)      | 160.042        | 288.100        | 333.187        | 371.137                          | 389.147        | 404.222        | 440.161                       | 458.168                          | 476.179        | 506.781 <sup>+2</sup> | 527.757 <sup>+2</sup>         | 532.280        | 574.286 <sup>+2</sup>         | 603.321        | 617.803 <sup>+2</sup>         | 717.368 <sup>+2</sup> | 735.365 <sup>+2</sup> | 744.361 <sup>+2</sup> | 756.334 <sup>+2</sup> | 963.474        | 1002.532 | 1012.548 | 1054.503 | 1147.582        | 1234.602        |
|-------------------------|----------------|----------------|----------------|----------------------------------|----------------|----------------|-------------------------------|----------------------------------|----------------|-----------------------|-------------------------------|----------------|-------------------------------|----------------|-------------------------------|-----------------------|-----------------------|-----------------------|-----------------------|----------------|----------|----------|----------|-----------------|-----------------|
| Frac. Inten. (% of TIC) | 2.43           | 4.35           | 1.66           | 9.06                             | 3.85           | 1.61           | 1.28                          | 18.92                            | 1.65           | 4.34                  | 2.25                          | 2.30           | 5.61                          | 1.76           | 2.38                          | 1.69                  | 1.57                  | 1.60                  | 1.80                  | 2.38           | 1.33     | 3.11     | 5.86     | 15.11           | 2.04            |
| Rel. Inten. (% of BP)   | 12.82          | 23.14          | 8.79           | 47.90                            | 20.51          | 8.53           | 6.77                          | 100.00                           | 8.70           | 22.96                 | 11.88                         | 12.16          | 29.64                         | 9.28           | 12.59                         | 8.96                  | 8.32                  | 8.44                  | 9.54                  | 12.58          | 7.08     | 18.42    | 30.96    | 79.87           | 10.77           |
| Score                   | 0.50           | 0.50           | 1.50           | 0.25                             | 0.50           | 1.50           | -0.07                         | 0.25                             | 0.50           | -0.23                 | -0.12                         | 1.50           | 1.50                          | 1.50           | 1.50                          | -0.06                 | -0.08                 | -0.08                 | -0.10                 | 1.50           | -0.07    | -0.16    | -0.31    | 1.50            | 1.50            |
| Ion-type                | b <sub>1</sub> | b <sub>2</sub> | y <sub>5</sub> | b <sub>3</sub> -H <sub>2</sub> O | b <sub>3</sub> | y <sub>6</sub> | y <sub>11</sub> <sup>+2</sup> | b <sub>4</sub> -H <sub>2</sub> O | b <sub>4</sub> | y <sub>6</sub>        | y <sub>11</sub> <sup>+2</sup> | y <sub>7</sub> | y <sub>12</sub> <sup>+2</sup> | y <sub>7</sub> | y <sub>12</sub> <sup>+2</sup> | -                     | -                     | -                     | -                     | y <sub>9</sub> | -        | -        | -        | y <sub>11</sub> | y <sub>12</sub> |
| Delta ppm               | -13.6          | -8.5           | -2.7           | -7.4                             | -7.8           | -6.9           | -                             | -7.2                             | -6.2           | -                     | -                             | -6.7           | -                             | 0.7            | -1.5                          | -                     | -                     | -                     | -                     | -9.3           | -        | -        | -        | -5.1            | 1.4             |

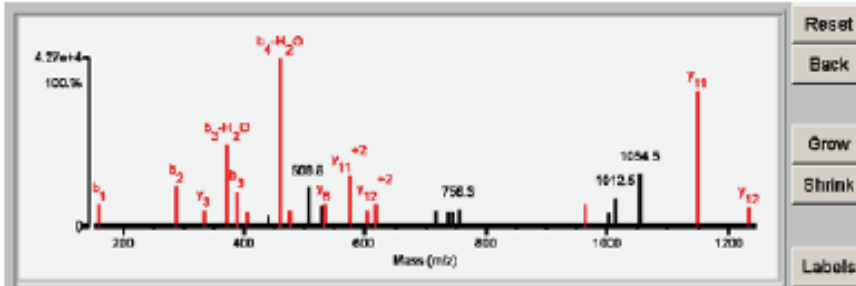

# S6

## Detailed Results

| Rank | Score | SPI (%) | BCS | # Unmatched Ions | Sequence                                | MH <sup>+</sup> Calculated (Da) | MH <sup>+</sup> Error (Da) | MH <sup>+</sup> Error (ppm) | Protein MW/pt (Da) | Species | Accession # | MS-Digest Index # | Protein Name                                                           |
|------|-------|---------|-----|------------------|-----------------------------------------|---------------------------------|----------------------------|-----------------------------|--------------------|---------|-------------|-------------------|------------------------------------------------------------------------|
| 1    | 11.56 | 51.2    | 8   | 13/25            | (F) A K/L/V/R/P P V Q V/Y/G I E/G/R (Y) | 2005.0510                       | 0.0001                     | 0.1                         | 23277.419.97       | HUMAN   | P48047      | 49683             | ATP synthase subunit O, mitochondrial precursor - Homo sapiens (Human) |

  

| Fragment-Ion (m/z)      | 72.080 | 84.046 | 84.078 | 86.096 | 84.064 | 120.082 | 133.063 | 136.076 | 143.063        | 175.123        | 232.141 | 323.103 | 330.094 | 442.272 | 454.202 | 531.287        | 607.832 <sup>+2</sup>         | 685.884                       | 694.346        | 735.420 <sup>+2</sup>         | 791.960 <sup>+2</sup>         | 793.413 <sup>+2</sup> | 818.531 | 912.459 | 956.503 <sup>+2</sup> |
|-------------------------|--------|--------|--------|--------|--------|---------|---------|---------|----------------|----------------|---------|---------|---------|---------|---------|----------------|-------------------------------|-------------------------------|----------------|-------------------------------|-------------------------------|-----------------------|---------|---------|-----------------------|
| Frac. Inten. (% of TIC) | 0.22   | 0.11   | 3.30   | 0.43   | 5.92   | 2.81    | 3.15    | 0.11    | 4.32           | 3.11           | 5.21    | 2.64    | 2.73    | 2.51    | 2.80    | 2.82           | 4.37                          | 3.87                          | 5.89           | 15.46                         | 9.58                          | 2.98                  | 4.19    | 2.53    | 8.96                  |
| Rel. Inten. (% of BP)   | 1.45   | 0.73   | 21.32  | 2.77   | 38.32  | 18.20   | 20.37   | 0.69    | 27.93          | 20.08          | 33.69   | 17.07   | 17.55   | 16.20   | 18.14   | 18.21          | 28.25                         | 25.04                         | 38.10          | 100.00                        | 61.95                         | 19.26                 | 27.07   | 16.34   | 57.97                 |
| Score                   | 0.50   | 1.00   | -0.21  | 0.22   | -0.36  | -0.16   | -0.20   | 1.00    | -0.28          | 1.50           | 1.50    | -0.17   | -0.18   | -0.16   | -0.18   | 1.50           | 1.50                          | 1.50                          | 1.50           | 1.50                          | 1.50                          | -0.19                 | -0.27   | -0.16   | -0.58                 |
| Ion-type                | V      | E      | L      | L      | L      | -       | -       | Y       | Y <sub>1</sub> | Y <sub>2</sub> | -       | -       | -       | -       | -       | y <sub>5</sub> | y <sub>11</sub> <sup>+2</sup> | Y <sub>12</sub> <sup>+2</sup> | Y <sub>6</sub> | y <sub>13</sub> <sup>+2</sup> | y <sub>14</sub> <sup>+2</sup> | -                     | -       | -       |                       |
| Delta ppm               | -6.0   | 16.8   | -      | -2.6   | -      | -       | -       | 3.7     | -              | 23.7           | -       | -       | -       | -       | -       | -3.6           | 4.1                           | 4.7                           | -6.3           | 6.5                           | 4.1                           | -                     | -       | -       |                       |

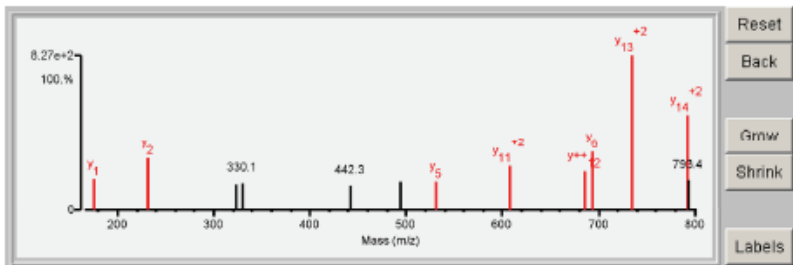

S7

Detailed Results

| Rank                    | Score  | SPI (%) | BCS     | # Unmatched ions | Sequence                                  | MH <sup>+</sup> Calculated (Da) | MH <sup>+</sup> Error (Da) | MH <sup>+</sup> Error (ppm) | Protein MW/pI (Da)    | Species | Accession #            | MS-Digest Index #     | Protein Name                                                     |         |                       |         |         |         |                       |                                   |                       |                       |                                   |                       |         |
|-------------------------|--------|---------|---------|------------------|-------------------------------------------|---------------------------------|----------------------------|-----------------------------|-----------------------|---------|------------------------|-----------------------|------------------------------------------------------------------|---------|-----------------------|---------|---------|---------|-----------------------|-----------------------------------|-----------------------|-----------------------|-----------------------------------|-----------------------|---------|
| 1                       | 10.23  | 59.1    | 7       | 14/25            | (F) G A D Q R R R R V D R R A G R I R (E) | 1735.7684                       | 0.0125                     | 7.2                         | 12248.99.34           | HUMAN   | <a href="#">Q9UII2</a> | <a href="#">41471</a> | ATPase inhibitor, mitochondrial precursor - Homo sapiens (Human) |         |                       |         |         |         |                       |                                   |                       |                       |                                   |                       |         |
| Fragment-ion (m/z)      | 86.097 | 159.018 | 233.058 | 267.064          | 358.712 <sup>+2</sup>                     | 416.235 <sup>+2</sup>           | 465.759                    | 481.153                     | 490.574 <sup>+3</sup> | 513.246 | 519.227                | 522.784 <sup>+2</sup> | 547.282                                                          | 555.944 | 561.295 <sup>+3</sup> | 562.249 | 587.802 | 607.797 | 630.819 <sup>+2</sup> | 686.347 <sup>+2</sup>             | 694.836 <sup>+2</sup> | 740.342 <sup>+2</sup> | 743.824 <sup>+2</sup>             | 752.354 <sup>+2</sup> | 787.356 |
| Frac. Inten. (% of TIC) | 0.10   | 4.24    | 2.32    | 2.50             | 4.43                                      | 2.02                            | 4.57                       | 4.39                        | 4.28                  | 2.80    | 2.17                   | 5.44                  | 2.43                                                             | 2.03    | 2.17                  | 3.10    | 3.69    | 2.80    | 20.52                 | 6.81                              | 7.58                  | 2.02                  | 2.24                              | 3.01                  | 2.93    |
| Rel. Inten. (% of BP)   | 0.51   | 20.84   | 11.32   | 12.17            | 21.57                                     | 9.86                            | 22.28                      | 21.40                       | 20.83                 | 13.63   | 10.59                  | 26.49                 | 11.82                                                            | 9.89    | 10.57                 | 15.11   | 17.98   | 12.67   | 100.00                | 33.17                             | 36.95                 | 9.83                  | 10.93                             | 14.66                 | 12.34   |
| Score                   | 0.22   | -0.21   | 0.50    | -0.12            | 1.50                                      | 1.50                            | 1.50                       | -0.21                       | -0.21                 | -0.14   | -0.11                  | 1.50                  | -0.12                                                            | -0.10   | -0.11                 | -0.15   | -0.18   | -0.13   | 1.50                  | 0.50                              | 1.50                  | -0.10                 | 0.50                              | 1.50                  | -0.12   |
| Ion-type                | LI     |         | 80      |                  | Y <sup>+2</sup>                           | Y <sup>+2</sup>                 | Y <sup>+2</sup>            | Y <sup>+2</sup>             |                       |         |                        | Y10 <sup>+2</sup>     |                                                                  |         |                       |         |         |         | Y12 <sup>+2</sup>     | Y13-NH <sub>2</sub> <sup>+2</sup> | Y13 <sup>+2</sup>     |                       | Y14-NH <sub>2</sub> <sup>+2</sup> | Y14 <sup>+2</sup>     |         |
| Delta ppm               | 12.5   |         | -10.1   |                  | 0.7                                       |                                 | 23.3                       | -1.1                        |                       |         |                        | 6.4                   |                                                                  |         |                       |         |         |         | 1.6                   | 18.8                              | -16.0                 |                       | -32.4                             | Y14 <sup>+2</sup>     | -9.0    |

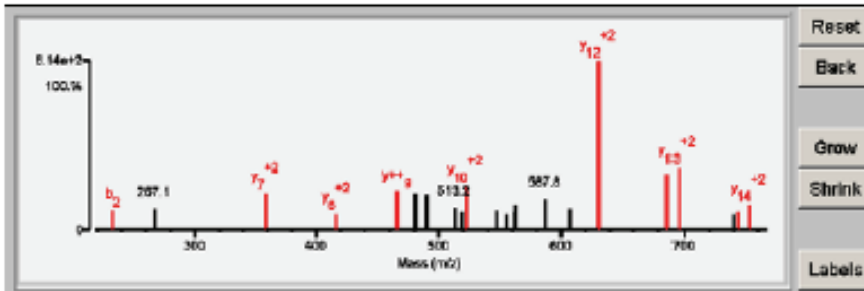

S8

Detailed Results

| Rank                    | Score  | SPI (%) | BCS     | # Unmatched ions | Sequence                                | MH <sup>+</sup> Calculated (Da) | MH <sup>+</sup> Error (Da) | MH <sup>+</sup> Error (ppm) | Protein MW/pI (Da) | Species               | Accession #            | MS-Digest Index #     | Protein Name                                                     |         |                       |                       |         |                       |                       |                       |                                   |                       |                       |                       |                       |
|-------------------------|--------|---------|---------|------------------|-----------------------------------------|---------------------------------|----------------------------|-----------------------------|--------------------|-----------------------|------------------------|-----------------------|------------------------------------------------------------------|---------|-----------------------|-----------------------|---------|-----------------------|-----------------------|-----------------------|-----------------------------------|-----------------------|-----------------------|-----------------------|-----------------------|
| 1                       | 16.73  | 75.7    | 10      | 9/25             | (G) A D Q R R R R V D R R A G R I R (E) | 1678.7449                       | 0.0124                     | 7.4                         | 12248.99.34        | HUMAN                 | <a href="#">Q9UII2</a> | <a href="#">41471</a> | ATPase inhibitor, mitochondrial precursor - Homo sapiens (Human) |         |                       |                       |         |                       |                       |                       |                                   |                       |                       |                       |                       |
| Fragment-ion (m/z)      | 80.047 | 88.044  | 175.119 | 244.094          | 251.068                                 | 273.056                         | 358.725 <sup>+2</sup>      | 416.228 <sup>+2</sup>       | 432.257            | 445.843 <sup>+3</sup> | 457.584 <sup>+3</sup>  | 463.911               | 465.774 <sup>+2</sup>                                            | 490.582 | 495.911 <sup>+3</sup> | 522.789 <sup>+2</sup> | 527.245 | 542.263 <sup>+3</sup> | 587.309 <sup>+2</sup> | 622.339 <sup>+2</sup> | 630.822                           | 686.343 <sup>+2</sup> | 694.850 <sup>+2</sup> | 743.348 <sup>+2</sup> | 752.374 <sup>+2</sup> |
| Frac. Inten. (% of TIC) | 2.42   | 4.13    | 1.87    | 2.99             | 3.22                                    | 2.42                            | 4.27                       | 3.40                        | 2.18               | 1.83                  | 2.34                   | 2.50                  | 3.48                                                             | 4.41    | 3.63                  | 5.49                  | 1.61    | 2.10                  | 8.65                  | 2.26                  | 19.18                             | 4.70                  | 4.51                  | 2.37                  | 4.28                  |
| Rel. Inten. (% of BP)   | 12.91  | 21.55   | 9.77    | 15.59            | 16.80                                   | 12.64                           | 22.52                      | 17.77                       | 11.40              | 8.52                  | 12.20                  | 13.07                 | 18.08                                                            | 23.04   | 18.94                 | 28.58                 | 8.43    | 10.99                 | 46.18                 | 11.78                 | 100.00                            | 24.58                 | 23.54                 | 12.37                 | 22.23                 |
| Score                   | -0.13  | -0.22   | 1.50    | 0.75             | -0.17                                   | 0.25                            | 1.50                       | 1.50                        | 1.50               | -0.09                 | 0.50                   | -0.13                 | 1.50                                                             | -0.29   | 0.50                  | 1.50                  | -0.08   | -0.11                 | 1.50                  | 1.50                  | -0.12                             | 1.50                  | 0.50                  | 1.50                  | 0.50                  |
| Ion-type                |        |         | Y1      | EN               |                                         | b2-H2O                          | Y <sup>+2</sup>            | Y <sup>+2</sup>             | Y <sup>+2</sup>    |                       | Y13-H2O <sup>+3</sup>  |                       | Y <sup>+2</sup>                                                  |         | Y14-H2O <sup>+3</sup> | Y10 <sup>+2</sup>     |         |                       | Y11 <sup>+2</sup>     | Y <sup>+2</sup>       | Y13-NH <sub>2</sub> <sup>+2</sup> | Y13 <sup>+2</sup>     | Y14-H2O <sup>+2</sup> | Y14 <sup>+2</sup>     | Y14 <sup>+2</sup>     |
| Delta ppm               |        |         | 0.3     | -1.6             |                                         | 4.9                             | 36.7                       | 6.7                         | 1.4                |                       | -0.4                   |                       | 32.0                                                             |         | 9.9                   | 15.0                  |         |                       | 12.5                  |                       | 12.4                              | 3.2                   | -10.9                 | 17.9                  |                       |

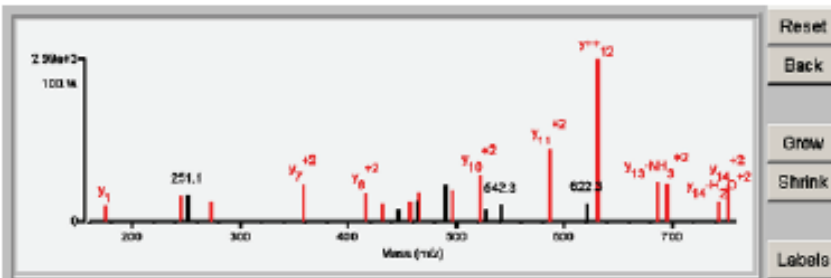

S9

Detailed Results

| Rank                    | Score  | SPI (%) | BCS     | # Unmatched Ions | Sequence                                         | MH <sup>+</sup> Calculated (Da) | MH <sup>+</sup> Error (Da) | MH <sup>+</sup> Error (ppm) | Protein MWip (Da)     | Species               | Accession #           | MS-Digest Index #     | Protein Name                                                     |                       |                       |                       |                       |                 |                 |                       |                       |                       |                       |                       |                       |
|-------------------------|--------|---------|---------|------------------|--------------------------------------------------|---------------------------------|----------------------------|-----------------------------|-----------------------|-----------------------|-----------------------|-----------------------|------------------------------------------------------------------|-----------------------|-----------------------|-----------------------|-----------------------|-----------------|-----------------|-----------------------|-----------------------|-----------------------|-----------------------|-----------------------|-----------------------|
| 1                       | 13.22  | 88.9    | 7       | 19/25            | (S)D I Q / A / E / N / V / D / R G A G A I R (E) | 1591.7129                       | 0.0000                     | 0.0                         | 12248.9534            | HUMAN                 | Q9J02                 | 41471                 | ATPase inhibitor, mitochondrial precursor - Homo sapiens (Human) |                       |                       |                       |                       |                 |                 |                       |                       |                       |                       |                       |                       |
| Fragment-ion (m/z)      | 86.066 | 101.072 | 158.025 | 204.029          | 205.037                                          | 249.055                         | 267.062                    | 358.714                     | 416.218 <sup>+2</sup> | 457.561 <sup>+3</sup> | 463.559 <sup>+3</sup> | 465.759 <sup>+2</sup> | 481.239 <sup>+2</sup>                                            | 507.762 <sup>+2</sup> | 513.229 <sup>+3</sup> | 514.229 <sup>+2</sup> | 516.758 <sup>+2</sup> | 522.780         | 523.284         | 578.793 <sup>+2</sup> | 587.290 <sup>+2</sup> | 621.796 <sup>+2</sup> | 630.820 <sup>+2</sup> | 686.324 <sup>+2</sup> | 694.831 <sup>+2</sup> |
| Frac. Inten. (% of TIC) | 0.06   | 0.08    | 5.18    | 3.91             | 1.78                                             | 2.08                            | 8.90                       | 2.83                        | 3.99                  | 7.99                  | 1.64                  | 3.83                  | 1.56                                                             | 1.83                  | 1.88                  | 2.86                  | 3.08                  | 6.64            | 2.77            | 1.67                  | 7.00                  | 2.13                  | 15.50                 | 9.62                  | 3.47                  |
| Rel. Inten. (% of BP)   | 0.35   | 0.51    | 33.40   | 25.29            | 11.17                                            | 13.43                           | 53.52                      | 18.26                       | 25.78                 | 48.77                 | 10.58                 | 24.71                 | 10.21                                                            | 10.49                 | 12.10                 | 18.44                 | 19.77                 | 36.37           | 17.85           | 10.80                 | 45.17                 | 13.72                 | 100.00                | 82.08                 | 22.38                 |
| Score                   | 0.22   | 0.90    | -0.33   | 0.50             | -0.11                                            | -0.13                           | -0.54                      | 1.50                        | 1.50                  | 0.50                  | 1.50                  | 1.50                  | -0.10                                                            | -0.10                 | -0.12                 | -0.18                 | -0.20                 | -0.18           | -0.18           | 1.50                  | 0.50                  | 1.50                  | 0.50                  | 1.50                  | 1.50                  |
| Ion-type                | LI     | OK      |         | b1               |                                                  |                                 |                            | Y <sup>++</sup>             |                       | Y <sup>++</sup>       | Y <sup>++</sup>       | Y <sup>++</sup>       | Y <sup>++</sup>                                                  | Y <sup>++</sup>       | Y <sup>++</sup>       | Y <sup>++</sup>       | Y <sup>++</sup>       | Y <sup>++</sup> | Y <sup>++</sup> | Y <sup>++</sup>       | Y <sup>++</sup>       | Y <sup>++</sup>       | Y <sup>++</sup>       | Y <sup>++</sup>       | Y <sup>++</sup>       |
| Delta ppm               | -8.4   | 7.5     |         | -22.6            |                                                  |                                 |                            | 6.0                         |                       | -16.4                 |                       |                       |                                                                  |                       |                       |                       |                       |                 |                 | 6.6                   | -20.1                 | -28.5                 | 2.7                   | -14.7                 | -23.9                 |

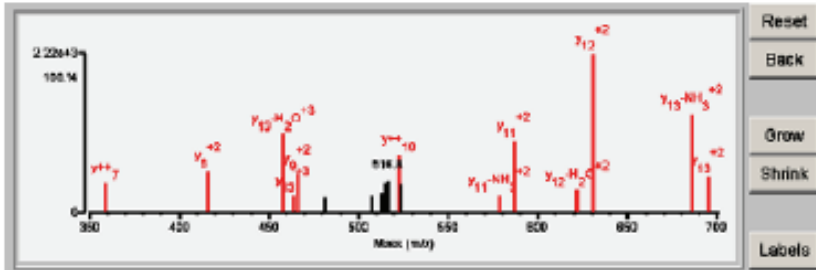

S10

Detailed Results

| Rank                    | Score  | SPI (%) | BCS    | # Unmatched Ions | Sequence                                                   | MH <sup>+</sup> Calculated (Da) | MH <sup>+</sup> Error (Da) | MH <sup>+</sup> Error (ppm) | Protein MWip (Da) | Species | Accession # | MS-Digest Index # | Protein Name                                                                      |         |         |         |         |                       |                       |         |         |         |         |          |          |
|-------------------------|--------|---------|--------|------------------|------------------------------------------------------------|---------------------------------|----------------------------|-----------------------------|-------------------|---------|-------------|-------------------|-----------------------------------------------------------------------------------|---------|---------|---------|---------|-----------------------|-----------------------|---------|---------|---------|---------|----------|----------|
| 1                       | 20.04  | 94.1    | 14     | 3/25             | (T)A T V A A Q A L A Q F V V P E T Q V S L L D N G L R (V) | 2606.3283                       | 0.0314                     | 12.1                        | 52646.1/5.94      | HUMAN   | P31930      | 461849            | Cytochrome b-c1 complex subunit 1, mitochondrial precursor - Homo sapiens (Human) |         |         |         |         |                       |                       |         |         |         |         |          |          |
| Fragment-ion (m/z)      | 72.082 | 74.060  | 86.097 | 120.081          | 175.115                                                    | 261.091                         | 362.151                    | 375.202                     | 390.145           | 408.160 | 459.271     | 479.196           | 555.285                                                                           | 558.233 | 574.290 | 678.291 | 687.380 | 712.385 <sup>+2</sup> | 721.384 <sup>+2</sup> | 791.381 | 800.465 | 887.502 | 986.553 | 1066.495 | 1441.765 |
| Frac. Inten. (% of TIC) | 0.06   | 1.87    | 0.08   | 0.19             | 1.95                                                       | 2.26                            | 1.97                       | 2.30                        | 4.43              | 3.33    | 4.87        | 6.06              | 2.08                                                                              | 2.01    | 3.41    | 11.34   | 4.83    | 4.22                  | 13.63                 | 2.53    | 2.48    | 8.03    | 3.04    | 4.98     | 8.08     |
| Rel. Inten. (% of BP)   | 0.46   | 13.74   | 0.44   | 1.39             | 14.30                                                      | 16.54                           | 14.46                      | 16.88                       | 32.51             | 24.41   | 35.75       | 44.45             | 15.23                                                                             | 14.78   | 25.00   | 83.19   | 35.41   | 30.93                 | 100.00                | 18.56   | 18.16   | 58.92   | 22.28   | 36.35    | 59.28    |
| Score                   | 0.50   | -0.14   | 0.22   | 1.00             | 1.50                                                       | 0.50                            | -0.14                      | 0.75                        | 0.25              | 0.50    | 1.50        | 0.50              | 0.75                                                                              | -0.15   | 1.50    | 0.50    | 1.50    | 0.50                  | 1.50                  | 1.50    | 1.50    | 1.50    | 1.50    | 0.50     | 1.50     |
| Ion-type                | V      |         | LI     | F                | y1                                                         | b2                              |                            | QVF                         | b3-H2O            | b3      | y4          | b4                | PETQV                                                                             |         | y5      | b6      | y6      | Y13-H2O <sup>+2</sup> | Y13 <sup>+2</sup>     | b7      | y7      | y8      | y9      | b9       | Y13      |
| Delta ppm               | 23.9   |         | 3.2    | 2.7              | -23.7                                                      | -1.3                            |                            | -3.9                        | -11.8             | 0.8     | 7.2         | -2.9              | 12.6                                                                              |         | -6.7    | -2.0    | 2.7     | 6.6                   | -3.3                  | 5.6     | 2.5     | 8.4     | -10.6   | -7.8     | 0.0      |

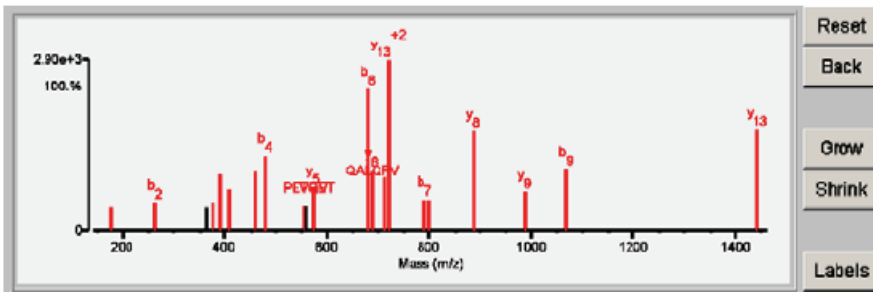

# S11

## Detailed Results

| Rank                    | Score   | SPI (%) | BCS     | # Unmatched Ions | Sequence                                            | MH <sup>+</sup> Calculated (Da) | MH <sup>+</sup> Error (Da) | MH <sup>+</sup> Error (ppm) | Protein MW/pi (Da) | Species | Accession #   | MS-Digest Index #                                                                 | Protein Name |         |         |          |                   |                        |          |          |          |          |          |          |          |      |
|-------------------------|---------|---------|---------|------------------|-----------------------------------------------------|---------------------------------|----------------------------|-----------------------------|--------------------|---------|---------------|-----------------------------------------------------------------------------------|--------------|---------|---------|----------|-------------------|------------------------|----------|----------|----------|----------|----------|----------|----------|------|
| 1                       | 23.84   | 98.4    | 15      | 1/25             | (G) D/P E E E N V E V E E L L V I D/P L/T/Y/V/R (E) | 2475.0803                       | 0.0084                     | 1.4                         | 10738.8439         | HUMAN   | P07819 481887 | Cytochrome b-c1 complex subunit 6, mitochondrial precursor - Homo sapiens (Human) |              |         |         |          |                   |                        |          |          |          |          |          |          |          |      |
| Fragment-ion (m/z)      | 175.118 | 274.184 | 375.234 | 476.273          | 486.182                                             | 614.217                         | 848.212                    | 888.418                     | 888.216            | 743.271 | 801.441       | 817.248                                                                           | 872.289      | 900.610 | 848.289 | 1013.601 | 1076.336          | 1138.517 <sup>+2</sup> | 1142.848 | 1204.378 | 1271.680 | 1933.424 | 1482.481 | 1676.642 | 1874.808 |      |
| Frac. Inten. (% of TIC) | 3.75    | 1.84    | 2.43    | 4.60             | 1.01                                                | 1.22                            | 0.95                       | 12.64                       | 1.63               | 1.53    | 25.16         | 3.14                                                                              | 1.56         | 5.38    | 3.20    | 3.28     | 3.27              | 2.25                   | 2.12     | 3.55     | 1.02     | 2.93     | 4.65     | 3.86     | 3.01     |      |
| Rel. Inten. (% of BP)   | 14.92   | 7.31    | 9.65    | 18.27            | 4.03                                                | 4.85                            | 3.79                       | 50.25                       | 6.47               | 6.09    | 100.00        | 12.47                                                                             | 6.18         | 21.37   | 12.70   | 13.04    | 12.99             | 8.95                   | 8.45     | 14.17    | 4.06     | 11.64    | 18.53    | 15.34    | 11.94    |      |
| Score                   | 1.50    | 1.50    | 1.50    | 1.50             | 0.75                                                | 0.75                            | 0.75                       | 1.50                        | 0.50               | 0.75    | 1.50          | 0.50                                                                              | -0.06        | 1.50    | 0.50    | 1.50     | 0.50              | 1.50                   | 1.50     | 0.50     | 1.50     | 0.50     | 0.50     | 0.50     | 0.50     | 0.50 |
| Ion-type                | y1      | y2      | y3      | y4               | PEEE                                                | PEEEE                           | EEEEEE                     | y6                          | b5                 | PEEEEE  | y7            | b6                                                                                | y8           | b7      | y9      | b8       | y10 <sup>+2</sup> | y10 <sup>+2</sup>      | y10      | b9       | y11      | b10      | b11      | b12      | b13      |      |
| Delta ppm               | -4.3    | -11.5   | -2.3    | -15.6            | 5.3                                                 | -24.4                           | -15.1                      | -5.5                        | 1.7                | -4.3    | -7.5          | -13.5                                                                             | -6.0         | -11.2   | 2.1     | -6.7     | -3.8              | 1.5                    | -5.5     | -3.0     | -2.7     | -5.7     | -7.3     | -8.8     |          |      |

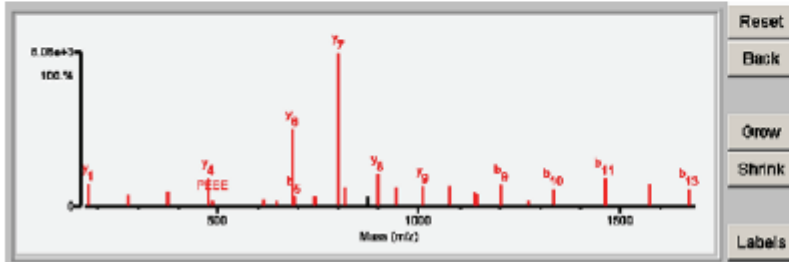

# S12

## Detailed Results

| Rank                    | Score  | SPI (%) | BCS    | # Unmatched Ions | Sequence                                    | MH <sup>+</sup> Calculated (Da) | MH <sup>+</sup> Error (Da) | MH <sup>+</sup> Error (ppm) | Protein MW/pi (Da) | Species          | Accession #           | MS-Digest Index #                                                                        | Protein Name |         |         |         |                       |                       |         |         |         |         |          |          |          |
|-------------------------|--------|---------|--------|------------------|---------------------------------------------|---------------------------------|----------------------------|-----------------------------|--------------------|------------------|-----------------------|------------------------------------------------------------------------------------------|--------------|---------|---------|---------|-----------------------|-----------------------|---------|---------|---------|---------|----------|----------|----------|
| 1                       | 18.24  | 87.6    | 12     | 4/25             | (A) E/V/S/V/V/K S E D/P/S/L/P/A/Y M D/R (R) | 2333.0035                       | 0.0115                     | 4.9                         | 19576.8952         | HUMAN            | P13073 101541         | Cytochrome c oxidase subunit 4 isoform 1, mitochondrial precursor - Homo sapiens (Human) |              |         |         |         |                       |                       |         |         |         |         |          |          |          |
| Fragment-ion (m/z)      | 70.064 | 72.082  | 84.045 | 86.097           | 120.079                                     | 141.102                         | 175.119                    | 226.062                     | 332.111            | 355.104          | 376.679 <sup>+2</sup> | 442.138                                                                                  | 523.197      | 541.205 | 584.252 | 640.276 | 655.288               | 725.782 <sup>+2</sup> | 752.336 | 810.318 | 865.410 | 952.451 | 1099.545 | 1141.429 | 1357.508 |
| Frac. Inten. (% of TIC) | 0.00   | 0.11    | 0.08   | 0.28             | 0.31                                        | 2.17                            | 5.58                       | 3.00                        | 3.01               | 2.77             | 9.34                  | 3.02                                                                                     | 4.58         | 3.54    | 1.93    | 5.14    | 2.72                  | 3.44                  | 28.76   | 5.02    | 3.51    | 4.66    | 1.83     | 2.70     | 2.54     |
| Rel. Inten. (% of BP)   | 0.01   | 0.37    | 0.20   | 0.98             | 1.09                                        | 7.55                            | 19.40                      | 10.43                       | 10.47              | 9.82             | 32.47                 | 10.49                                                                                    | 15.92        | 12.31   | 6.72    | 17.87   | 9.48                  | 11.97                 | 100.00  | 17.44   | 12.21   | 16.19   | 6.38     | 9.38     | 8.82     |
| Score                   | 0.20   | 0.50    | 1.00   | 0.22             | 1.00                                        | -0.08                           | 1.50                       | 0.50                        | 0.75               | 0.50             | 1.50                  | 0.50                                                                                     | 0.25         | 0.50    | 1.50    | 0.50    | 1.50                  | 0.25                  | 1.50    | -0.17   | 1.50    | 1.50    | 1.50     | -0.09    |          |
| Ion-type                | PR     | V       | E      | LI               | F                                           | y1                              | b1                         | SED                         | b2                 | y6 <sup>+2</sup> | b3                    | b4-H2O                                                                                   | b4           | y4      | b5      | y5      | b11-H2O <sup>+2</sup> | y6                    | y6      | y7      | y8      | y9      | y9       | y9       |          |
| Delta ppm               | -8.9   | 19.6    | 2.5    | 0.9              | -12.3                                       | 0.8                             | -16.2                      | 4.4                         | -12.6              | 14.5             | -5.6                  | -2.0                                                                                     | -6.7         | 4.1     | -1.9    | 2.4     | -15.1                 | -4.8                  | -16.0   | -4.8    | 18.7    |         |          |          |          |

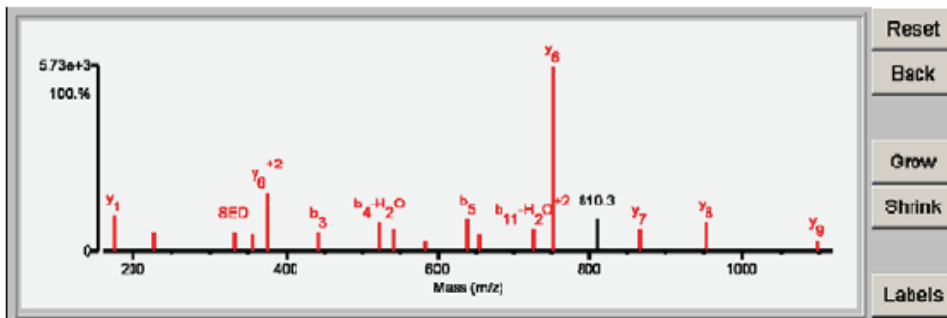

# S13

## Detailed Results

| Rank | Score | SPI (%) | BCS | # Unmatched Ions | Sequence                            | MH <sup>+</sup> Calculated (Da) | MH <sup>+</sup> Error (Da) | MH <sup>+</sup> Error (ppm) | Protein MW (pl) (Da) | Species | Accession # | MS-Digest Index # | Protein Name                                                                    |
|------|-------|---------|-----|------------------|-------------------------------------|---------------------------------|----------------------------|-----------------------------|----------------------|---------|-------------|-------------------|---------------------------------------------------------------------------------|
| 1    | 16.29 | 77.9    | 9   | 8/25             | (S) HIGIS QIEIT/DIE/E/F D I A R (W) | 1808.8231                       | 0.0032                     | 2.0                         | 18774.98.30          | HUMAN   | P20874      | 101827            | Cytochrome c oxidase subunit 5A, mitochondrial precursor - Homo sapiens (Human) |

  

| Fragment-ion (m/z)      | 188.087 | 228.082 | 227.084 | 248.168 | 283.090 | 384.895 | 438.180 | 488.091 | 488.188 | 508.268 | 522.717 | 632.700 | 627.218 | 837.282 | 781.304 | 788.322 | 807.788 | 843.288 | 881.336 | 982.444 | 1111.414 | 1328.636 | 1383.488 | 1383.640 | 1412.888 |
|-------------------------|---------|---------|---------|---------|---------|---------|---------|---------|---------|---------|---------|---------|---------|---------|---------|---------|---------|---------|---------|---------|----------|----------|----------|----------|----------|
| Frac. Inten. (% of TIC) | 2.15    | 12.91   | 1.54    | 12.87   | 3.05    | 1.88    | 2.78    | 4.92    | 3.57    | 2.18    | 2.03    | 1.55    | 4.43    | 1.80    | 1.73    | 5.62    | 3.81    | 1.82    | 3.80    | 3.49    | 3.71     | 3.77     | 4.99     | 7.72     | 1.85     |
| Rel. Inten. (% of BP)   | 16.93   | 100.00  | 11.93   | 99.67   | 23.66   | 14.53   | 21.56   | 38.09   | 27.55   | 16.88   | 15.74   | 11.98   | 34.33   | 13.94   | 13.40   | 43.53   | 29.50   | 14.08   | 29.40   | 27.07   | 28.70    | 29.19    | 36.65    | 59.75    | 14.34    |
| Score                   | 0.50    | 0.50    | -0.12   | 1.50    | 0.50    | -0.15   | -0.22   | -0.38   | 0.50    | 1.50    | -0.16   | -0.12   | 0.50    | 1.50    | 1.50    | -0.29   | 0.50    | 1.50    | 1.50    | 1.50    | 1.50     | 1.50     | 0.50     | 1.50     | -0.14    |
| Ion-type                | b1      | b1      |         | y2      | b2      |         |         | b4      | y4      |         |         | b6      | y6      |         | y6      |         | b7      | y7      | y8      | y9      | y11      | b11      | y12      |          |          |
| Delta ppm               | -16.4   | -15.4   |         | -0.7    | 10.8    |         |         | -16.7   | 8.8     |         |         | -2.8    | -3.0    |         | -18.4   |         | -33.6   | -32.2   | 33.1    | -35.6   | -7.4     | -4.5     | -18.5    |          |          |

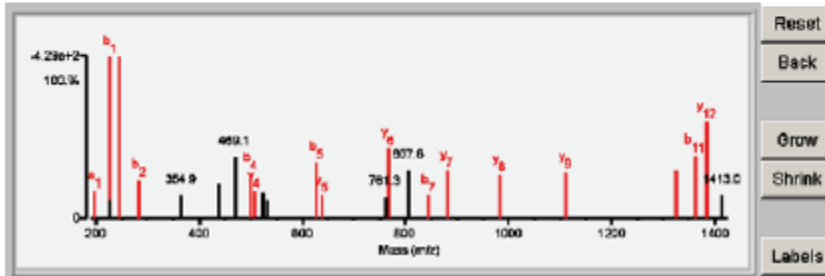

# S14

## Detailed Results

| Rank | Score | SPI (%) | BCS | # Unmatched Ions | Sequence                                                              | MH <sup>+</sup> Calculated (Da) | MH <sup>+</sup> Error (Da) | MH <sup>+</sup> Error (ppm) | Protein MW (pl) (Da) | Species | Accession # | MS-Digest Index # | Protein Name                                                                    |
|------|-------|---------|-----|------------------|-----------------------------------------------------------------------|---------------------------------|----------------------------|-----------------------------|----------------------|---------|-------------|-------------------|---------------------------------------------------------------------------------|
| 1    | 22.04 | 96.2    | 12  | 2/25             | (A) S G A \ G \ V \ P \ T \ D \ E \ E \ Q \ A \ T \ G \ L \ E \ R (E) | 1790.7861                       | 0.0044                     | 2.5                         | 13695.89.07          | HUMAN   | P10606      | 101649            | Cytochrome c oxidase subunit 5B, mitochondrial precursor - Homo sapiens (Human) |

  

| Fragment-ion (m/z)      | 70.064 | 133.058 | 175.118 | 215.042 | 290.077 | 304.158 | 329.090 | 347.101 | 418.184 | 446.163 | 474.262 | 572.224 | 575.306 | 646.343 | 664.311 <sup>++</sup> | 673.315            | 700.272 | 774.393 | 903.462 | 1014.471 | 1032.486 | 1248.574 | 1327.634 | 1345.624 | 1348.621 |
|-------------------------|--------|---------|---------|---------|---------|---------|---------|---------|---------|---------|---------|---------|---------|---------|-----------------------|--------------------|---------|---------|---------|----------|----------|----------|----------|----------|----------|
| Frac. Inten. (% of TIC) | 0.00   | 1.15    | 1.16    | 1.23    | 3.06    | 1.43    | 1.23    | 21.02   | 2.01    | 5.12    | 1.79    | 1.48    | 1.19    | 1.77    | 1.65                  | 23.41              | 1.19    | 1.26    | 1.44    | 0.71     | 1.57     | 0.86     | 1.21     | 20.45    | 2.62     |
| Rel. Inten. (% of BP)   | 0.00   | 4.91    | 4.97    | 5.25    | 13.09   | 6.09    | 5.25    | 89.80   | 8.57    | 21.87   | 7.63    | 6.31    | 5.08    | 7.58    | 7.05                  | 100.00             | 5.07    | 5.38    | 6.16    | 3.04     | 6.09     | 3.88     | 5.18     | 87.38    | 11.18    |
| Score                   | 0.20   | -0.05   | 1.50    | 0.25    | 0.50    | 1.50    | 0.25    | 0.50    | 0.50    | 1.50    | 0.75    | 1.50    | 1.50    | 1.50    | 0.50                  | 1.50               | PTDEEQ  | 1.50    | 1.50    | 1.50     | 0.50     | 1.50     | 0.50     | 1.50     | -0.11    |
| Ion-type                | PR     |         | y1      | b2-H2O  | b3      | y2      | b4-H2O  | b4      | a5      | b5      | y4      | PTDEE   | y5      | y5      | y12-H2O <sup>++</sup> | y <sup>++</sup> 12 | PTDEEQ  | y7      | y8      | y8       | y8-H2O   | y9       | y11      | y12-H2O  | y12      |
| Delta ppm               | -23.2  |         | -8.3    | -34.3   | -15.9   | -12.0   | -8.9    | -4.5    | 16.8    | -19.5   | -9.9    | 5.0     | -15.2   | -13.9   | 1.6                   | 0.2                | -11.2   | -22.9   | 9.8     | -13.9    | -9.3     | 3.3      | 15.9     | 1.1      |          |

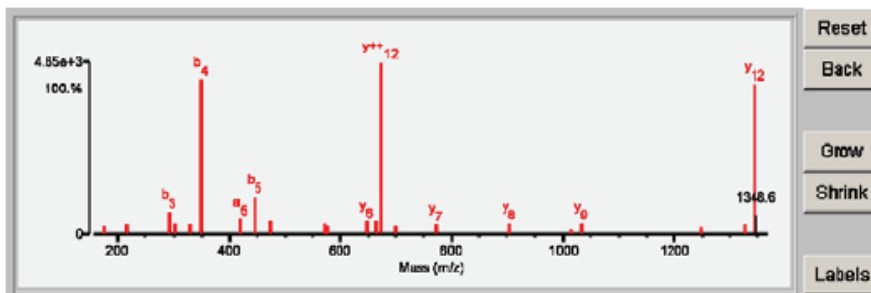

# S15

## Detailed Results

| Rank                                                                                                                                                                                                                                                                                                                                                                                                                                                                                                                                                                                                                                                                                                                                                                                                                                                                                                                                                                                                                                                                                                                                                                                                                                                                                                                                                                                                                                                                                                                                                                                                                                                                                                                                                                                                                                                                                                                                                                                                                                                                                                                                                                                                                                                                                                                                                                           | Score  | SPI (%) | BCS    | # Unmatched Ions | Sequence                                         | MH <sup>+</sup> Calculated (Da) | MH <sup>+</sup> Error (Da) | MH <sup>+</sup> Error (ppm) | Protein MW/pi (Da) | Species | Accession #   | MS-Digest Index #                                                           | Protein Name |                    |                       |         |         |         |                       |         |         |         |         |         |          |         |         |         |                       |         |         |         |                       |         |         |         |         |         |          |                         |      |      |      |      |      |      |      |      |      |      |      |      |      |      |       |      |      |      |       |      |      |      |      |      |      |                       |      |       |      |      |       |       |      |       |      |       |       |       |       |       |       |       |       |       |        |       |       |       |       |       |       |       |      |       |      |      |       |       |      |       |      |       |      |      |       |      |      |      |      |      |      |      |      |      |       |      |      |          |    |    |    |     |   |    |   |   |   |    |    |    |    |    |                  |     |    |      |                  |    |    |    |    |    |    |           |      |  |       |      |  |  |       |  |     |  |      |       |  |     |     |      |     |      |     |     |     |     |      |     |
|--------------------------------------------------------------------------------------------------------------------------------------------------------------------------------------------------------------------------------------------------------------------------------------------------------------------------------------------------------------------------------------------------------------------------------------------------------------------------------------------------------------------------------------------------------------------------------------------------------------------------------------------------------------------------------------------------------------------------------------------------------------------------------------------------------------------------------------------------------------------------------------------------------------------------------------------------------------------------------------------------------------------------------------------------------------------------------------------------------------------------------------------------------------------------------------------------------------------------------------------------------------------------------------------------------------------------------------------------------------------------------------------------------------------------------------------------------------------------------------------------------------------------------------------------------------------------------------------------------------------------------------------------------------------------------------------------------------------------------------------------------------------------------------------------------------------------------------------------------------------------------------------------------------------------------------------------------------------------------------------------------------------------------------------------------------------------------------------------------------------------------------------------------------------------------------------------------------------------------------------------------------------------------------------------------------------------------------------------------------------------------|--------|---------|--------|------------------|--------------------------------------------------|---------------------------------|----------------------------|-----------------------------|--------------------|---------|---------------|-----------------------------------------------------------------------------|--------------|--------------------|-----------------------|---------|---------|---------|-----------------------|---------|---------|---------|---------|---------|----------|---------|---------|---------|-----------------------|---------|---------|---------|-----------------------|---------|---------|---------|---------|---------|----------|-------------------------|------|------|------|------|------|------|------|------|------|------|------|------|------|------|-------|------|------|------|-------|------|------|------|------|------|------|-----------------------|------|-------|------|------|-------|-------|------|-------|------|-------|-------|-------|-------|-------|-------|-------|-------|-------|--------|-------|-------|-------|-------|-------|-------|-------|------|-------|------|------|-------|-------|------|-------|------|-------|------|------|-------|------|------|------|------|------|------|------|------|------|-------|------|------|----------|----|----|----|-----|---|----|---|---|---|----|----|----|----|----|------------------|-----|----|------|------------------|----|----|----|----|----|----|-----------|------|--|-------|------|--|--|-------|--|-----|--|------|-------|--|-----|-----|------|-----|------|-----|-----|-----|-----|------|-----|
| 1                                                                                                                                                                                                                                                                                                                                                                                                                                                                                                                                                                                                                                                                                                                                                                                                                                                                                                                                                                                                                                                                                                                                                                                                                                                                                                                                                                                                                                                                                                                                                                                                                                                                                                                                                                                                                                                                                                                                                                                                                                                                                                                                                                                                                                                                                                                                                                              | 15.38  | 73.9    | 7      | 7/25             | (S)D L A L L H I P P S V Y / P / W / S H / R (G) | 1821.8377                       | 0.0268                     | 14.7                        | 35390.19.15        | HUMAN   | P08574 114427 | Cytochrome c1, heme protein, mitochondrial precursor - Homo sapiens (Human) |              |                    |                       |         |         |         |                       |         |         |         |         |         |          |         |         |         |                       |         |         |         |                       |         |         |         |         |         |          |                         |      |      |      |      |      |      |      |      |      |      |      |      |      |      |       |      |      |      |       |      |      |      |      |      |      |                       |      |       |      |      |       |       |      |       |      |       |       |       |       |       |       |       |       |       |        |       |       |       |       |       |       |       |      |       |      |      |       |       |      |       |      |       |      |      |       |      |      |      |      |      |      |      |      |      |       |      |      |          |    |    |    |     |   |    |   |   |   |    |    |    |    |    |                  |     |    |      |                  |    |    |    |    |    |    |           |      |  |       |      |  |  |       |  |     |  |      |       |  |     |     |      |     |      |     |     |     |     |      |     |
| <table border="1"> <thead> <tr> <th>Fragment-ion (m/z)</th> <th>70.065</th><th>72.081</th><th>84.043</th><th>86.096</th><th>87.099</th><th>94.063</th><th>110.070</th><th>120.080</th><th>136.076</th><th>158.026</th><th>175.119</th><th>251.147</th><th>267.151</th><th>317.120</th><th>341.676<sup>+2</sup></th><th>380.190</th><th>399.210</th><th>445.218</th><th>563.776<sup>+2</sup></th><th>585.294</th><th>682.345</th><th>696.307</th><th>716.374</th><th>977.460</th><th>1126.550</th> </tr> </thead> <tbody> <tr> <td>Frac. Inten. (% of TIC)</td> <td>0.02</td><td>3.64</td><td>0.14</td><td>0.72</td><td>2.94</td><td>4.47</td><td>0.39</td><td>7.37</td><td>0.40</td><td>2.50</td><td>7.12</td><td>2.64</td><td>2.68</td><td>2.69</td><td>10.78</td><td>3.24</td><td>5.32</td><td>2.88</td><td>11.38</td><td>6.16</td><td>9.00</td><td>4.30</td><td>2.60</td><td>2.92</td><td>3.90</td> </tr> <tr> <td>Rel. Inten. (% of BP)</td> <td>0.16</td><td>32.03</td><td>1.27</td><td>6.36</td><td>26.87</td><td>39.27</td><td>3.41</td><td>64.80</td><td>3.54</td><td>22.02</td><td>62.57</td><td>23.22</td><td>22.66</td><td>22.81</td><td>94.79</td><td>28.47</td><td>46.75</td><td>25.12</td><td>100.00</td><td>54.11</td><td>79.13</td><td>37.82</td><td>22.82</td><td>26.70</td><td>34.27</td> </tr> <tr> <td>Score</td> <td>0.20</td><td>-0.32</td><td>1.00</td><td>0.22</td><td>-0.26</td><td>-0.39</td><td>1.00</td><td>-0.85</td><td>1.00</td><td>-0.22</td><td>1.50</td><td>0.75</td><td>-0.23</td><td>0.50</td><td>1.50</td><td>0.75</td><td>1.50</td><td>0.75</td><td>1.50</td><td>1.50</td><td>1.50</td><td>0.50</td><td>-0.23</td><td>0.50</td><td>1.50</td> </tr> <tr> <td>Ion-type</td> <td>LI</td><td>b2</td><td>b3</td><td>ELH</td><td>E</td><td>LI</td><td>H</td><td>Y</td><td>Y</td><td>LH</td><td>y1</td><td>b2</td><td>b5</td><td>b2</td><td>y5<sup>+2</sup></td><td>ELH</td><td>y3</td><td>PSYP</td><td>y6<sup>+2</sup></td><td>y4</td><td>y5</td><td>b5</td><td>b6</td><td>y9</td><td>y9</td> </tr> <tr> <td>Delta ppm</td> <td>-1.8</td><td></td><td>-11.8</td><td>-0.3</td><td></td><td></td><td>-11.6</td><td></td><td>0.8</td><td></td><td>-2.0</td><td>-15.7</td><td></td><td>5.8</td><td>3.2</td><td>-8.8</td><td>0.0</td><td>19.2</td><td>2.0</td><td>7.7</td><td>4.6</td><td>5.8</td><td>19.4</td><td>6.1</td> </tr> </tbody> </table> |        |         |        |                  |                                                  |                                 |                            |                             |                    |         |               |                                                                             |              | Fragment-ion (m/z) | 70.065                | 72.081  | 84.043  | 86.096  | 87.099                | 94.063  | 110.070 | 120.080 | 136.076 | 158.026 | 175.119  | 251.147 | 267.151 | 317.120 | 341.676 <sup>+2</sup> | 380.190 | 399.210 | 445.218 | 563.776 <sup>+2</sup> | 585.294 | 682.345 | 696.307 | 716.374 | 977.460 | 1126.550 | Frac. Inten. (% of TIC) | 0.02 | 3.64 | 0.14 | 0.72 | 2.94 | 4.47 | 0.39 | 7.37 | 0.40 | 2.50 | 7.12 | 2.64 | 2.68 | 2.69 | 10.78 | 3.24 | 5.32 | 2.88 | 11.38 | 6.16 | 9.00 | 4.30 | 2.60 | 2.92 | 3.90 | Rel. Inten. (% of BP) | 0.16 | 32.03 | 1.27 | 6.36 | 26.87 | 39.27 | 3.41 | 64.80 | 3.54 | 22.02 | 62.57 | 23.22 | 22.66 | 22.81 | 94.79 | 28.47 | 46.75 | 25.12 | 100.00 | 54.11 | 79.13 | 37.82 | 22.82 | 26.70 | 34.27 | Score | 0.20 | -0.32 | 1.00 | 0.22 | -0.26 | -0.39 | 1.00 | -0.85 | 1.00 | -0.22 | 1.50 | 0.75 | -0.23 | 0.50 | 1.50 | 0.75 | 1.50 | 0.75 | 1.50 | 1.50 | 1.50 | 0.50 | -0.23 | 0.50 | 1.50 | Ion-type | LI | b2 | b3 | ELH | E | LI | H | Y | Y | LH | y1 | b2 | b5 | b2 | y5 <sup>+2</sup> | ELH | y3 | PSYP | y6 <sup>+2</sup> | y4 | y5 | b5 | b6 | y9 | y9 | Delta ppm | -1.8 |  | -11.8 | -0.3 |  |  | -11.6 |  | 0.8 |  | -2.0 | -15.7 |  | 5.8 | 3.2 | -8.8 | 0.0 | 19.2 | 2.0 | 7.7 | 4.6 | 5.8 | 19.4 | 6.1 |
| Fragment-ion (m/z)                                                                                                                                                                                                                                                                                                                                                                                                                                                                                                                                                                                                                                                                                                                                                                                                                                                                                                                                                                                                                                                                                                                                                                                                                                                                                                                                                                                                                                                                                                                                                                                                                                                                                                                                                                                                                                                                                                                                                                                                                                                                                                                                                                                                                                                                                                                                                             | 70.065 | 72.081  | 84.043 | 86.096           | 87.099                                           | 94.063                          | 110.070                    | 120.080                     | 136.076            | 158.026 | 175.119       | 251.147                                                                     | 267.151      | 317.120            | 341.676 <sup>+2</sup> | 380.190 | 399.210 | 445.218 | 563.776 <sup>+2</sup> | 585.294 | 682.345 | 696.307 | 716.374 | 977.460 | 1126.550 |         |         |         |                       |         |         |         |                       |         |         |         |         |         |          |                         |      |      |      |      |      |      |      |      |      |      |      |      |      |      |       |      |      |      |       |      |      |      |      |      |      |                       |      |       |      |      |       |       |      |       |      |       |       |       |       |       |       |       |       |       |        |       |       |       |       |       |       |       |      |       |      |      |       |       |      |       |      |       |      |      |       |      |      |      |      |      |      |      |      |      |       |      |      |          |    |    |    |     |   |    |   |   |   |    |    |    |    |    |                  |     |    |      |                  |    |    |    |    |    |    |           |      |  |       |      |  |  |       |  |     |  |      |       |  |     |     |      |     |      |     |     |     |     |      |     |
| Frac. Inten. (% of TIC)                                                                                                                                                                                                                                                                                                                                                                                                                                                                                                                                                                                                                                                                                                                                                                                                                                                                                                                                                                                                                                                                                                                                                                                                                                                                                                                                                                                                                                                                                                                                                                                                                                                                                                                                                                                                                                                                                                                                                                                                                                                                                                                                                                                                                                                                                                                                                        | 0.02   | 3.64    | 0.14   | 0.72             | 2.94                                             | 4.47                            | 0.39                       | 7.37                        | 0.40               | 2.50    | 7.12          | 2.64                                                                        | 2.68         | 2.69               | 10.78                 | 3.24    | 5.32    | 2.88    | 11.38                 | 6.16    | 9.00    | 4.30    | 2.60    | 2.92    | 3.90     |         |         |         |                       |         |         |         |                       |         |         |         |         |         |          |                         |      |      |      |      |      |      |      |      |      |      |      |      |      |      |       |      |      |      |       |      |      |      |      |      |      |                       |      |       |      |      |       |       |      |       |      |       |       |       |       |       |       |       |       |       |        |       |       |       |       |       |       |       |      |       |      |      |       |       |      |       |      |       |      |      |       |      |      |      |      |      |      |      |      |      |       |      |      |          |    |    |    |     |   |    |   |   |   |    |    |    |    |    |                  |     |    |      |                  |    |    |    |    |    |    |           |      |  |       |      |  |  |       |  |     |  |      |       |  |     |     |      |     |      |     |     |     |     |      |     |
| Rel. Inten. (% of BP)                                                                                                                                                                                                                                                                                                                                                                                                                                                                                                                                                                                                                                                                                                                                                                                                                                                                                                                                                                                                                                                                                                                                                                                                                                                                                                                                                                                                                                                                                                                                                                                                                                                                                                                                                                                                                                                                                                                                                                                                                                                                                                                                                                                                                                                                                                                                                          | 0.16   | 32.03   | 1.27   | 6.36             | 26.87                                            | 39.27                           | 3.41                       | 64.80                       | 3.54               | 22.02   | 62.57         | 23.22                                                                       | 22.66        | 22.81              | 94.79                 | 28.47   | 46.75   | 25.12   | 100.00                | 54.11   | 79.13   | 37.82   | 22.82   | 26.70   | 34.27    |         |         |         |                       |         |         |         |                       |         |         |         |         |         |          |                         |      |      |      |      |      |      |      |      |      |      |      |      |      |      |       |      |      |      |       |      |      |      |      |      |      |                       |      |       |      |      |       |       |      |       |      |       |       |       |       |       |       |       |       |       |        |       |       |       |       |       |       |       |      |       |      |      |       |       |      |       |      |       |      |      |       |      |      |      |      |      |      |      |      |      |       |      |      |          |    |    |    |     |   |    |   |   |   |    |    |    |    |    |                  |     |    |      |                  |    |    |    |    |    |    |           |      |  |       |      |  |  |       |  |     |  |      |       |  |     |     |      |     |      |     |     |     |     |      |     |
| Score                                                                                                                                                                                                                                                                                                                                                                                                                                                                                                                                                                                                                                                                                                                                                                                                                                                                                                                                                                                                                                                                                                                                                                                                                                                                                                                                                                                                                                                                                                                                                                                                                                                                                                                                                                                                                                                                                                                                                                                                                                                                                                                                                                                                                                                                                                                                                                          | 0.20   | -0.32   | 1.00   | 0.22             | -0.26                                            | -0.39                           | 1.00                       | -0.85                       | 1.00               | -0.22   | 1.50          | 0.75                                                                        | -0.23        | 0.50               | 1.50                  | 0.75    | 1.50    | 0.75    | 1.50                  | 1.50    | 1.50    | 0.50    | -0.23   | 0.50    | 1.50     |         |         |         |                       |         |         |         |                       |         |         |         |         |         |          |                         |      |      |      |      |      |      |      |      |      |      |      |      |      |      |       |      |      |      |       |      |      |      |      |      |      |                       |      |       |      |      |       |       |      |       |      |       |       |       |       |       |       |       |       |       |        |       |       |       |       |       |       |       |      |       |      |      |       |       |      |       |      |       |      |      |       |      |      |      |      |      |      |      |      |      |       |      |      |          |    |    |    |     |   |    |   |   |   |    |    |    |    |    |                  |     |    |      |                  |    |    |    |    |    |    |           |      |  |       |      |  |  |       |  |     |  |      |       |  |     |     |      |     |      |     |     |     |     |      |     |
| Ion-type                                                                                                                                                                                                                                                                                                                                                                                                                                                                                                                                                                                                                                                                                                                                                                                                                                                                                                                                                                                                                                                                                                                                                                                                                                                                                                                                                                                                                                                                                                                                                                                                                                                                                                                                                                                                                                                                                                                                                                                                                                                                                                                                                                                                                                                                                                                                                                       | LI     | b2      | b3     | ELH              | E                                                | LI                              | H                          | Y                           | Y                  | LH      | y1            | b2                                                                          | b5           | b2                 | y5 <sup>+2</sup>      | ELH     | y3      | PSYP    | y6 <sup>+2</sup>      | y4      | y5      | b5      | b6      | y9      | y9       |         |         |         |                       |         |         |         |                       |         |         |         |         |         |          |                         |      |      |      |      |      |      |      |      |      |      |      |      |      |      |       |      |      |      |       |      |      |      |      |      |      |                       |      |       |      |      |       |       |      |       |      |       |       |       |       |       |       |       |       |       |        |       |       |       |       |       |       |       |      |       |      |      |       |       |      |       |      |       |      |      |       |      |      |      |      |      |      |      |      |      |       |      |      |          |    |    |    |     |   |    |   |   |   |    |    |    |    |    |                  |     |    |      |                  |    |    |    |    |    |    |           |      |  |       |      |  |  |       |  |     |  |      |       |  |     |     |      |     |      |     |     |     |     |      |     |
| Delta ppm                                                                                                                                                                                                                                                                                                                                                                                                                                                                                                                                                                                                                                                                                                                                                                                                                                                                                                                                                                                                                                                                                                                                                                                                                                                                                                                                                                                                                                                                                                                                                                                                                                                                                                                                                                                                                                                                                                                                                                                                                                                                                                                                                                                                                                                                                                                                                                      | -1.8   |         | -11.8  | -0.3             |                                                  |                                 | -11.6                      |                             | 0.8                |         | -2.0          | -15.7                                                                       |              | 5.8                | 3.2                   | -8.8    | 0.0     | 19.2    | 2.0                   | 7.7     | 4.6     | 5.8     | 19.4    | 6.1     |          |         |         |         |                       |         |         |         |                       |         |         |         |         |         |          |                         |      |      |      |      |      |      |      |      |      |      |      |      |      |      |       |      |      |      |       |      |      |      |      |      |      |                       |      |       |      |      |       |       |      |       |      |       |       |       |       |       |       |       |       |       |        |       |       |       |       |       |       |       |      |       |      |      |       |       |      |       |      |       |      |      |       |      |      |      |      |      |      |      |      |      |       |      |      |          |    |    |    |     |   |    |   |   |   |    |    |    |    |    |                  |     |    |      |                  |    |    |    |    |    |    |           |      |  |       |      |  |  |       |  |     |  |      |       |  |     |     |      |     |      |     |     |     |     |      |     |

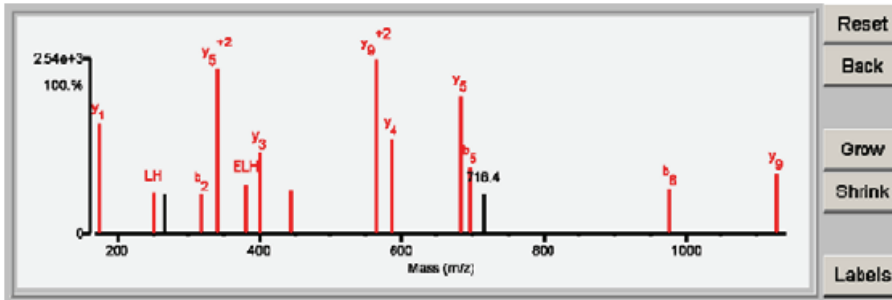

# S16

## Detailed Results

| Rank                                                                                                                                                                                                                                                                                                                                                                                                                                                                                                                                                                                                                                                                                                                                                                                                                                                                                                                                                                                                                                                                                                                                                                                                                                                                                                                                                                                                                                                                                                                                                                                                                                                                                                                                                                                                                                                                                                                                                                                                                                                                                                                                                                                                                                                                                                                                                                                                                      | Score  | SPI (%) | BCS     | # Unmatched Ions | Sequence                                             | MH <sup>+</sup> Calculated (Da) | MH <sup>+</sup> Error (Da) | MH <sup>+</sup> Error (ppm) | Protein MW/pi (Da) | Species | Accession #   | MS-Digest Index #                                                                                                                              | Protein Name |                    |         |         |          |                        |                        |                        |          |          |          |          |          |         |         |         |         |         |          |                        |                        |                        |          |          |          |          |          |                         |      |      |      |      |      |      |       |      |      |      |      |      |      |      |      |      |      |      |      |      |       |      |      |      |      |                       |      |       |       |       |       |       |       |       |       |       |       |       |       |       |       |       |       |       |       |       |        |       |       |       |       |       |      |      |      |      |      |      |      |      |      |       |      |       |      |      |      |      |      |       |       |       |      |      |       |       |      |          |    |    |    |    |    |    |    |    |    |    |    |        |       |    |    |     |     |     |         |     |     |     |     |     |     |           |      |       |      |      |       |      |      |      |      |      |  |       |       |     |     |      |  |  |  |      |      |  |  |  |       |
|---------------------------------------------------------------------------------------------------------------------------------------------------------------------------------------------------------------------------------------------------------------------------------------------------------------------------------------------------------------------------------------------------------------------------------------------------------------------------------------------------------------------------------------------------------------------------------------------------------------------------------------------------------------------------------------------------------------------------------------------------------------------------------------------------------------------------------------------------------------------------------------------------------------------------------------------------------------------------------------------------------------------------------------------------------------------------------------------------------------------------------------------------------------------------------------------------------------------------------------------------------------------------------------------------------------------------------------------------------------------------------------------------------------------------------------------------------------------------------------------------------------------------------------------------------------------------------------------------------------------------------------------------------------------------------------------------------------------------------------------------------------------------------------------------------------------------------------------------------------------------------------------------------------------------------------------------------------------------------------------------------------------------------------------------------------------------------------------------------------------------------------------------------------------------------------------------------------------------------------------------------------------------------------------------------------------------------------------------------------------------------------------------------------------------|--------|---------|---------|------------------|------------------------------------------------------|---------------------------------|----------------------------|-----------------------------|--------------------|---------|---------------|------------------------------------------------------------------------------------------------------------------------------------------------|--------------|--------------------|---------|---------|----------|------------------------|------------------------|------------------------|----------|----------|----------|----------|----------|---------|---------|---------|---------|---------|----------|------------------------|------------------------|------------------------|----------|----------|----------|----------|----------|-------------------------|------|------|------|------|------|------|-------|------|------|------|------|------|------|------|------|------|------|------|------|------|-------|------|------|------|------|-----------------------|------|-------|-------|-------|-------|-------|-------|-------|-------|-------|-------|-------|-------|-------|-------|-------|-------|-------|-------|-------|--------|-------|-------|-------|-------|-------|------|------|------|------|------|------|------|------|------|-------|------|-------|------|------|------|------|------|-------|-------|-------|------|------|-------|-------|------|----------|----|----|----|----|----|----|----|----|----|----|----|--------|-------|----|----|-----|-----|-----|---------|-----|-----|-----|-----|-----|-----|-----------|------|-------|------|------|-------|------|------|------|------|------|--|-------|-------|-----|-----|------|--|--|--|------|------|--|--|--|-------|
| 1                                                                                                                                                                                                                                                                                                                                                                                                                                                                                                                                                                                                                                                                                                                                                                                                                                                                                                                                                                                                                                                                                                                                                                                                                                                                                                                                                                                                                                                                                                                                                                                                                                                                                                                                                                                                                                                                                                                                                                                                                                                                                                                                                                                                                                                                                                                                                                                                                         | 14.85  | 80.0    | 10      | 7/25             | (D)D L V I P V K I P A P A K E V Y T S / G S V K (W) | 2357.1152                       | -0.9549                    | -2.1                        | 48640.50.01        | HUMAN   | P38857 388579 | Dihydrodipyrrole-residue succinyltransferase component of 2-oxoglutarate dehydrogenase complex, mitochondrial precursor - Homo sapiens (Human) |              |                    |         |         |          |                        |                        |                        |          |          |          |          |          |         |         |         |         |         |          |                        |                        |                        |          |          |          |          |          |                         |      |      |      |      |      |      |       |      |      |      |      |      |      |      |      |      |      |      |      |      |       |      |      |      |      |                       |      |       |       |       |       |       |       |       |       |       |       |       |       |       |       |       |       |       |       |       |        |       |       |       |       |       |      |      |      |      |      |      |      |      |      |       |      |       |      |      |      |      |      |       |       |       |      |      |       |       |      |          |    |    |    |    |    |    |    |    |    |    |    |        |       |    |    |     |     |     |         |     |     |     |     |     |     |           |      |       |      |      |       |      |      |      |      |      |  |       |       |     |     |      |  |  |  |      |      |  |  |  |       |
| <table border="1"> <thead> <tr> <th>Fragment-ion (m/z)</th> <th>38.096</th><th>317.113</th><th>416.102</th><th>446.232</th><th>458.218</th><th>517.230</th><th>598.288</th><th>616.298</th><th>678.323</th><th>795.344</th><th>875.404</th><th>887.411</th><th>962.436</th><th>971.451</th><th>990.466</th><th>991.475</th><th>1062.498</th><th>1085.524<sup>+2</sup></th><th>1103.542<sup>+2</sup></th><th>1123.539<sup>+2</sup></th><th>1377.658</th><th>1478.712</th><th>1695.768</th><th>1648.757</th><th>1741.779</th> </tr> </thead> <tbody> <tr> <td>Frac. Inten. (% of TIC)</td> <td>0.06</td><td>2.23</td><td>4.37</td><td>2.46</td><td>6.13</td><td>3.07</td><td>13.89</td><td>3.84</td><td>2.91</td><td>5.50</td><td>3.14</td><td>3.94</td><td>1.30</td><td>2.73</td><td>4.04</td><td>1.58</td><td>3.85</td><td>1.67</td><td>1.53</td><td>4.00</td><td>14.55</td><td>7.00</td><td>1.68</td><td>1.60</td><td>2.13</td> </tr> <tr> <td>Rel. Inten. (% of BP)</td> <td>0.44</td><td>18.30</td><td>32.02</td><td>17.07</td><td>42.16</td><td>21.07</td><td>96.17</td><td>26.40</td><td>19.88</td><td>38.33</td><td>21.58</td><td>27.06</td><td>13.25</td><td>16.74</td><td>27.75</td><td>10.87</td><td>38.45</td><td>11.40</td><td>10.54</td><td>27.53</td><td>100.00</td><td>46.13</td><td>11.56</td><td>10.96</td><td>14.62</td> </tr> <tr> <td>Score</td> <td>0.22</td><td>0.50</td><td>0.50</td><td>1.50</td><td>0.25</td><td>0.50</td><td>0.25</td><td>0.50</td><td>1.50</td><td>-0.36</td><td>0.50</td><td>-0.27</td><td>0.50</td><td>1.50</td><td>0.50</td><td>1.50</td><td>1.50</td><td>-0.11</td><td>-0.11</td><td>-0.28</td><td>1.50</td><td>1.50</td><td>-0.12</td><td>-0.11</td><td>1.50</td> </tr> <tr> <td>Ion-type</td> <td>LI</td><td>b2</td><td>b3</td><td>b4</td><td>y4</td><td>b4</td><td>b5</td><td>b5</td><td>y6</td><td>b6</td><td>b7</td><td>b7+H2O</td><td>y++17</td><td>b7</td><td>y9</td><td>y10</td><td>y13</td><td>b12</td><td>b12+H2O</td><td>y15</td><td>y14</td><td>y14</td><td>y14</td><td>y15</td><td>y15</td> </tr> <tr> <td>Delta ppm</td> <td>-2.6</td><td>-15.3</td><td>-9.6</td><td>-6.4</td><td>-10.2</td><td>-6.0</td><td>-5.7</td><td>-6.4</td><td>-4.1</td><td>-8.6</td><td></td><td>-18.9</td><td>-21.7</td><td>7.5</td><td>6.0</td><td>-7.8</td><td></td><td></td><td></td><td>-5.1</td><td>26.2</td><td></td><td></td><td></td><td>-24.1</td> </tr> </tbody> </table> |        |         |         |                  |                                                      |                                 |                            |                             |                    |         |               |                                                                                                                                                |              | Fragment-ion (m/z) | 38.096  | 317.113 | 416.102  | 446.232                | 458.218                | 517.230                | 598.288  | 616.298  | 678.323  | 795.344  | 875.404  | 887.411 | 962.436 | 971.451 | 990.466 | 991.475 | 1062.498 | 1085.524 <sup>+2</sup> | 1103.542 <sup>+2</sup> | 1123.539 <sup>+2</sup> | 1377.658 | 1478.712 | 1695.768 | 1648.757 | 1741.779 | Frac. Inten. (% of TIC) | 0.06 | 2.23 | 4.37 | 2.46 | 6.13 | 3.07 | 13.89 | 3.84 | 2.91 | 5.50 | 3.14 | 3.94 | 1.30 | 2.73 | 4.04 | 1.58 | 3.85 | 1.67 | 1.53 | 4.00 | 14.55 | 7.00 | 1.68 | 1.60 | 2.13 | Rel. Inten. (% of BP) | 0.44 | 18.30 | 32.02 | 17.07 | 42.16 | 21.07 | 96.17 | 26.40 | 19.88 | 38.33 | 21.58 | 27.06 | 13.25 | 16.74 | 27.75 | 10.87 | 38.45 | 11.40 | 10.54 | 27.53 | 100.00 | 46.13 | 11.56 | 10.96 | 14.62 | Score | 0.22 | 0.50 | 0.50 | 1.50 | 0.25 | 0.50 | 0.25 | 0.50 | 1.50 | -0.36 | 0.50 | -0.27 | 0.50 | 1.50 | 0.50 | 1.50 | 1.50 | -0.11 | -0.11 | -0.28 | 1.50 | 1.50 | -0.12 | -0.11 | 1.50 | Ion-type | LI | b2 | b3 | b4 | y4 | b4 | b5 | b5 | y6 | b6 | b7 | b7+H2O | y++17 | b7 | y9 | y10 | y13 | b12 | b12+H2O | y15 | y14 | y14 | y14 | y15 | y15 | Delta ppm | -2.6 | -15.3 | -9.6 | -6.4 | -10.2 | -6.0 | -5.7 | -6.4 | -4.1 | -8.6 |  | -18.9 | -21.7 | 7.5 | 6.0 | -7.8 |  |  |  | -5.1 | 26.2 |  |  |  | -24.1 |
| Fragment-ion (m/z)                                                                                                                                                                                                                                                                                                                                                                                                                                                                                                                                                                                                                                                                                                                                                                                                                                                                                                                                                                                                                                                                                                                                                                                                                                                                                                                                                                                                                                                                                                                                                                                                                                                                                                                                                                                                                                                                                                                                                                                                                                                                                                                                                                                                                                                                                                                                                                                                        | 38.096 | 317.113 | 416.102 | 446.232          | 458.218                                              | 517.230                         | 598.288                    | 616.298                     | 678.323            | 795.344 | 875.404       | 887.411                                                                                                                                        | 962.436      | 971.451            | 990.466 | 991.475 | 1062.498 | 1085.524 <sup>+2</sup> | 1103.542 <sup>+2</sup> | 1123.539 <sup>+2</sup> | 1377.658 | 1478.712 | 1695.768 | 1648.757 | 1741.779 |         |         |         |         |         |          |                        |                        |                        |          |          |          |          |          |                         |      |      |      |      |      |      |       |      |      |      |      |      |      |      |      |      |      |      |      |      |       |      |      |      |      |                       |      |       |       |       |       |       |       |       |       |       |       |       |       |       |       |       |       |       |       |       |        |       |       |       |       |       |      |      |      |      |      |      |      |      |      |       |      |       |      |      |      |      |      |       |       |       |      |      |       |       |      |          |    |    |    |    |    |    |    |    |    |    |    |        |       |    |    |     |     |     |         |     |     |     |     |     |     |           |      |       |      |      |       |      |      |      |      |      |  |       |       |     |     |      |  |  |  |      |      |  |  |  |       |
| Frac. Inten. (% of TIC)                                                                                                                                                                                                                                                                                                                                                                                                                                                                                                                                                                                                                                                                                                                                                                                                                                                                                                                                                                                                                                                                                                                                                                                                                                                                                                                                                                                                                                                                                                                                                                                                                                                                                                                                                                                                                                                                                                                                                                                                                                                                                                                                                                                                                                                                                                                                                                                                   | 0.06   | 2.23    | 4.37    | 2.46             | 6.13                                                 | 3.07                            | 13.89                      | 3.84                        | 2.91               | 5.50    | 3.14          | 3.94                                                                                                                                           | 1.30         | 2.73               | 4.04    | 1.58    | 3.85     | 1.67                   | 1.53                   | 4.00                   | 14.55    | 7.00     | 1.68     | 1.60     | 2.13     |         |         |         |         |         |          |                        |                        |                        |          |          |          |          |          |                         |      |      |      |      |      |      |       |      |      |      |      |      |      |      |      |      |      |      |      |      |       |      |      |      |      |                       |      |       |       |       |       |       |       |       |       |       |       |       |       |       |       |       |       |       |       |       |        |       |       |       |       |       |      |      |      |      |      |      |      |      |      |       |      |       |      |      |      |      |      |       |       |       |      |      |       |       |      |          |    |    |    |    |    |    |    |    |    |    |    |        |       |    |    |     |     |     |         |     |     |     |     |     |     |           |      |       |      |      |       |      |      |      |      |      |  |       |       |     |     |      |  |  |  |      |      |  |  |  |       |
| Rel. Inten. (% of BP)                                                                                                                                                                                                                                                                                                                                                                                                                                                                                                                                                                                                                                                                                                                                                                                                                                                                                                                                                                                                                                                                                                                                                                                                                                                                                                                                                                                                                                                                                                                                                                                                                                                                                                                                                                                                                                                                                                                                                                                                                                                                                                                                                                                                                                                                                                                                                                                                     | 0.44   | 18.30   | 32.02   | 17.07            | 42.16                                                | 21.07                           | 96.17                      | 26.40                       | 19.88              | 38.33   | 21.58         | 27.06                                                                                                                                          | 13.25        | 16.74              | 27.75   | 10.87   | 38.45    | 11.40                  | 10.54                  | 27.53                  | 100.00   | 46.13    | 11.56    | 10.96    | 14.62    |         |         |         |         |         |          |                        |                        |                        |          |          |          |          |          |                         |      |      |      |      |      |      |       |      |      |      |      |      |      |      |      |      |      |      |      |      |       |      |      |      |      |                       |      |       |       |       |       |       |       |       |       |       |       |       |       |       |       |       |       |       |       |       |        |       |       |       |       |       |      |      |      |      |      |      |      |      |      |       |      |       |      |      |      |      |      |       |       |       |      |      |       |       |      |          |    |    |    |    |    |    |    |    |    |    |    |        |       |    |    |     |     |     |         |     |     |     |     |     |     |           |      |       |      |      |       |      |      |      |      |      |  |       |       |     |     |      |  |  |  |      |      |  |  |  |       |
| Score                                                                                                                                                                                                                                                                                                                                                                                                                                                                                                                                                                                                                                                                                                                                                                                                                                                                                                                                                                                                                                                                                                                                                                                                                                                                                                                                                                                                                                                                                                                                                                                                                                                                                                                                                                                                                                                                                                                                                                                                                                                                                                                                                                                                                                                                                                                                                                                                                     | 0.22   | 0.50    | 0.50    | 1.50             | 0.25                                                 | 0.50                            | 0.25                       | 0.50                        | 1.50               | -0.36   | 0.50          | -0.27                                                                                                                                          | 0.50         | 1.50               | 0.50    | 1.50    | 1.50     | -0.11                  | -0.11                  | -0.28                  | 1.50     | 1.50     | -0.12    | -0.11    | 1.50     |         |         |         |         |         |          |                        |                        |                        |          |          |          |          |          |                         |      |      |      |      |      |      |       |      |      |      |      |      |      |      |      |      |      |      |      |      |       |      |      |      |      |                       |      |       |       |       |       |       |       |       |       |       |       |       |       |       |       |       |       |       |       |       |        |       |       |       |       |       |      |      |      |      |      |      |      |      |      |       |      |       |      |      |      |      |      |       |       |       |      |      |       |       |      |          |    |    |    |    |    |    |    |    |    |    |    |        |       |    |    |     |     |     |         |     |     |     |     |     |     |           |      |       |      |      |       |      |      |      |      |      |  |       |       |     |     |      |  |  |  |      |      |  |  |  |       |
| Ion-type                                                                                                                                                                                                                                                                                                                                                                                                                                                                                                                                                                                                                                                                                                                                                                                                                                                                                                                                                                                                                                                                                                                                                                                                                                                                                                                                                                                                                                                                                                                                                                                                                                                                                                                                                                                                                                                                                                                                                                                                                                                                                                                                                                                                                                                                                                                                                                                                                  | LI     | b2      | b3      | b4               | y4                                                   | b4                              | b5                         | b5                          | y6                 | b6      | b7            | b7+H2O                                                                                                                                         | y++17        | b7                 | y9      | y10     | y13      | b12                    | b12+H2O                | y15                    | y14      | y14      | y14      | y15      | y15      |         |         |         |         |         |          |                        |                        |                        |          |          |          |          |          |                         |      |      |      |      |      |      |       |      |      |      |      |      |      |      |      |      |      |      |      |      |       |      |      |      |      |                       |      |       |       |       |       |       |       |       |       |       |       |       |       |       |       |       |       |       |       |       |        |       |       |       |       |       |      |      |      |      |      |      |      |      |      |       |      |       |      |      |      |      |      |       |       |       |      |      |       |       |      |          |    |    |    |    |    |    |    |    |    |    |    |        |       |    |    |     |     |     |         |     |     |     |     |     |     |           |      |       |      |      |       |      |      |      |      |      |  |       |       |     |     |      |  |  |  |      |      |  |  |  |       |
| Delta ppm                                                                                                                                                                                                                                                                                                                                                                                                                                                                                                                                                                                                                                                                                                                                                                                                                                                                                                                                                                                                                                                                                                                                                                                                                                                                                                                                                                                                                                                                                                                                                                                                                                                                                                                                                                                                                                                                                                                                                                                                                                                                                                                                                                                                                                                                                                                                                                                                                 | -2.6   | -15.3   | -9.6    | -6.4             | -10.2                                                | -6.0                            | -5.7                       | -6.4                        | -4.1               | -8.6    |               | -18.9                                                                                                                                          | -21.7        | 7.5                | 6.0     | -7.8    |          |                        |                        | -5.1                   | 26.2     |          |          |          | -24.1    |         |         |         |         |         |          |                        |                        |                        |          |          |          |          |          |                         |      |      |      |      |      |      |       |      |      |      |      |      |      |      |      |      |      |      |      |      |       |      |      |      |      |                       |      |       |       |       |       |       |       |       |       |       |       |       |       |       |       |       |       |       |       |       |        |       |       |       |       |       |      |      |      |      |      |      |      |      |      |       |      |       |      |      |      |      |      |       |       |       |      |      |       |       |      |          |    |    |    |    |    |    |    |    |    |    |    |        |       |    |    |     |     |     |         |     |     |     |     |     |     |           |      |       |      |      |       |      |      |      |      |      |  |       |       |     |     |      |  |  |  |      |      |  |  |  |       |

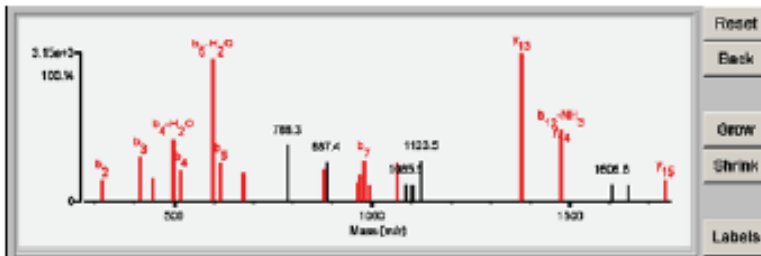



# S17

## Detailed Results

| Rank                    | Score  | SP1 (%) | BC3     | # Unmatched Ions | Sequence                               | MH <sup>+</sup> Calculated (Da) | MH <sup>+</sup> Error (Da) | MH <sup>+</sup> Error (ppm) | Protein MW/pI (Da) | Species | Accession # | M8-Digest Index # | Protein Name                                 |         |         |         |         |                     |          |          |          |          |          |          |          |
|-------------------------|--------|---------|---------|------------------|----------------------------------------|---------------------------------|----------------------------|-----------------------------|--------------------|---------|-------------|-------------------|----------------------------------------------|---------|---------|---------|---------|---------------------|----------|----------|----------|----------|----------|----------|----------|
| 1                       | 14.41  | 78.3    | 12      | 7/25             | (D) DAEVVDVID G TIV/E/ED L/G K/S/R (E) | 2085.8740                       | -0.0200                    | -8.8                        | 82488.3/4.78       | HUMAN   | P14826      | 185471            | Endoplasmic precursor - Homo sapiens (Human) |         |         |         |         |                     |          |          |          |          |          |          |          |
| Fragment-Ion (m/z)      | 72.061 | 88.085  | 128.068 | 176.118          | 204.030                                | 262.148                         | 333.073                    | 404.183                     | 432.137            | 488.221 | 547.168     | 582.273           | 648.236                                      | 810.386 | 818.324 | 838.412 | 875.408 | 1000.386            | 1088.480 | 1071.324 | 1074.488 | 1167.667 | 1232.624 | 1347.667 | 1440.814 |
| Frao. Inten. (% of TIC) | 0.12   | 0.10    | 2.59    | 2.48             | 4.23                                   | 5.98                            | 6.42                       | 2.25                        | 7.60               | 2.04    | 10.53       | 3.82              | 7.43                                         | 2.58    | 3.73    | 3.00    | 5.97    | 7.72                | 4.96     | 2.38     | 2.49     | 2.26     | 2.13     | 4.06     | 3.08     |
| Rel. Inten. (% of BP)   | 1.16   | 0.98    | 24.63   | 23.62            | 40.20                                  | 56.85                           | 61.00                      | 21.36                       | 72.21              | 19.42   | 100.00      | 36.33             | 70.57                                        | 24.55   | 35.46   | 28.49   | 56.75   | 73.30               | 47.11    | 22.63    | 23.70    | 21.48    | 20.27    | 38.59    | 29.25    |
| Score                   | 0.50   | 0.22    | -0.25   | 1.50             | 0.50                                   | 1.50                            | 0.50                       | 0.50                        | 0.50               | -0.19   | 0.50        | 1.50              | 0.50                                         | 1.50    | 0.50    | 1.50    | -0.57   | 0.25                | 1.50     | -0.23    | -0.24    | 1.50     | -0.20    | -0.39    | 1.50     |
| Ion-type                | V      | LI      |         | y1               | b1                                     | y2                              | b2                         | a3                          | b3                 |         | b4          | y4                | b5                                           | y6      | b6      | y7      |         | bg-H <sub>2</sub> O | y8       |          |          | y9       |          |          | y12      |
| Delta ppm               | 1.7    | -16.6   |         | -2.0             | -18.6                                  | -17.5                           | -8.7                       | 33.4                        | -16.7              |         | -22.2       | -14.2             | -8.3                                         | -9.5    | -13.4   | -24.7   |         | -9.2                | -16.4    |          |          | 17.8     |          |          | -19.9    |

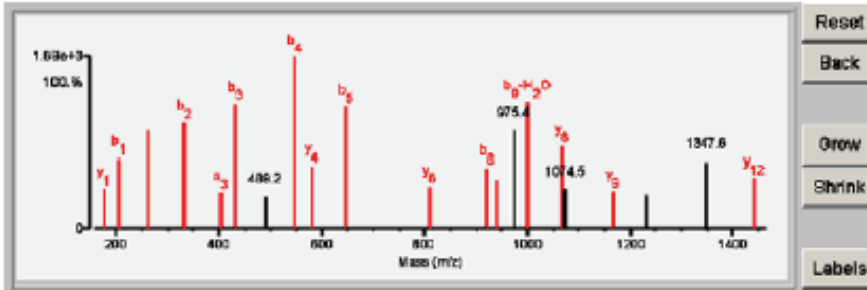

# S18

## Detailed Results

| Rank                    | Score  | SP1 (%) | BC3     | # Unmatched Ions | Sequence                    | MH <sup>+</sup> Calculated (Da) | MH <sup>+</sup> Error (Da) | MH <sup>+</sup> Error (ppm) | Protein MW/pI (Da) | Species | Accession # | M8-Digest Index # | Protein Name                                             |         |                                   |                       |         |         |                                   |                       |         |         |         |         |                    |
|-------------------------|--------|---------|---------|------------------|-----------------------------|---------------------------------|----------------------------|-----------------------------|--------------------|---------|-------------|-------------------|----------------------------------------------------------|---------|-----------------------------------|-----------------------|---------|---------|-----------------------------------|-----------------------|---------|---------|---------|---------|--------------------|
| 1                       | 22.82  | 88.7    | 8       | 3/25             | (E) EIQIP/R/E/T/A/A/Q/R (C) | 1214.6470                       | 0.0098                     | 3.2                         | 54980.0/6.48       | HUMAN   | Q88HE7      | 187818            | ERO1-like protein alpha precursor - Homo sapiens (Human) |         |                                   |                       |         |         |                                   |                       |         |         |         |         |                    |
| Fragment-Ion (m/z)      | 70.085 | 84.043  | 101.072 | 172.041          | 176.118                     | 190.062                         | 218.060                    | 218.060                     | 227.100            | 236.074 | 303.178     | 328.148           | 348.105                                                  | 374.217 | 377.700 <sup>+2</sup>             | 388.702 <sup>+2</sup> | 436.228 | 446.248 | 480.265 <sup>+2</sup>             | 488.258 <sup>+2</sup> | 648.308 | 876.348 | 772.381 | 868.446 | 880.488            |
| Frao. Inten. (% of TIC) | 0.00   | 0.06    | 0.17    | 1.41             | 0.95                        | 2.50                            | 5.91                       | 1.04                        | 0.63               | 0.87    | 0.65        | 1.15              | 3.09                                                     | 1.75    | 1.10                              | 4.51                  | 42.25   | 1.32    | 4.67                              | 0.72                  | 2.45    | 1.78    | 6.22    | 13.32   | 1.45               |
| Rel. Inten. (% of BP)   | 0.00   | 0.15    | 0.39    | 3.34             | 2.25                        | 5.91                            | 13.98                      | 2.47                        | 1.49               | 2.07    | 1.55        | 2.75              | 7.31                                                     | 4.15    | 2.61                              | 10.66                 | 100.00  | 3.13    | 11.06                             | 1.71                  | 5.81    | 4.21    | 14.72   | 31.54   | 3.42               |
| Score                   | 0.20   | 1.00    | 0.50    | -0.03            | 1.50                        | 0.50                            | 0.50                       | -0.02                       | 0.75               | -0.02   | 1.50        | 0.75              | 0.50                                                     | 1.50    | 0.50                              | 1.50                  | 1.50    | 1.50    | 1.50                              | 1.50                  | 1.50    | 1.50    | 1.50    | 1.50    | 1.50               |
| Ion-type                | PR     | E       | QH      |                  | y1                          | a1                              | b1                         |                             | PE                 |         | y2          | PET               | b2                                                       | y3      | y7-H <sub>2</sub> O <sup>+2</sup> | y7 <sup>+2</sup>      | y**8    | y4      | y9-H <sub>2</sub> O <sup>+2</sup> | y9 <sup>+2</sup>      | y5      | y6      | y7      | y8      | y9-NH <sub>3</sub> |
| Delta ppm               | -0.4   | -21.3   | 11.5    |                  | 0.3                         | -11.8                           | 1.6                        |                             | -17.7              |         | -5.7        | -16.5             | -9.3                                                     | 7.6     | 12.6                              | 2.2                   | 4.8     | -7.8    | 6.5                               | 5.2                   | 5.6     | 10.6    | -5.4    | -2.8    | -10.9              |

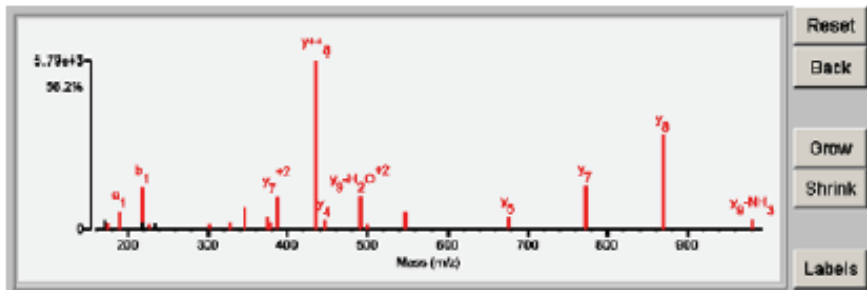



# S19

## Detailed Results

| Rank | Score | SPI (%) | BCS | # Unmatched Ions | Sequence                                                                                                                                                                                    | MH <sup>+</sup> Calculated (Da) | MH <sup>+</sup> Error (Da) | MH <sup>+</sup> Error (ppm) | Protein MW/pl (Da) | Species | Accession #            | MS-Digest Index #      | Protein Name                                                         |
|------|-------|---------|-----|------------------|---------------------------------------------------------------------------------------------------------------------------------------------------------------------------------------------|---------------------------------|----------------------------|-----------------------------|--------------------|---------|------------------------|------------------------|----------------------------------------------------------------------|
| 1    | 12.34 | 83.4    | 6   | 10/25            | (R) E <sup>+</sup> N <sup>+</sup> L <sup>+</sup> I <sup>+</sup> V <sup>+</sup> P <sup>+</sup> E <sup>+</sup> G <sup>+</sup> P <sup>+</sup> L <sup>+</sup> Y <sup>+</sup> R <sup>+</sup> (V) | 1359.6977                       | -0.0086                    | -6.3                        | 65034.6/8.23       | HUMAN   | <a href="#">Q969P0</a> | <a href="#">268031</a> | Immunoglobulin superfamily member 8 precursor - Homo sapiens (Human) |

  

| Fragment-ion (m/z)      | 70.066 | 72.082 | 84.047 | 86.096 | 94.066 | 101.071 | 110.071 | 136.076 | 157.130 | 175.121 | 183.121 | 185.084 | 218.047 | 251.066 | 289.117 | 308.220 | 317.116 | 416.229 <sup>+2</sup> | 430.198 | 529.267 | 558.252 | 605.335 | 744.354 | 831.433 | 930.496 |
|-------------------------|--------|--------|--------|--------|--------|---------|---------|---------|---------|---------|---------|---------|---------|---------|---------|---------|---------|-----------------------|---------|---------|---------|---------|---------|---------|---------|
| Frac. Inten. (% of TIC) | 0.01   | 0.23   | 0.08   | 0.28   | 1.64   | 1.28    | 3.41    | 0.11    | 1.30    | 2.86    | 1.18    | 1.80    | 3.18    | 1.51    | 1.88    | 1.83    | 18.42   | 4.72                  | 13.51   | 2.82    | 1.34    | 4.10    | 1.55    | 28.39   | 2.78    |
| Rel. Inten. (% of BP)   | 0.02   | 0.82   | 0.27   | 1.00   | 5.79   | 4.50    | 12.02   | 0.39    | 4.59    | 10.09   | 4.14    | 6.35    | 11.19   | 5.33    | 6.56    | 5.74    | 64.89   | 16.62                 | 47.68   | 9.95    | 4.71    | 14.43   | 5.45    | 100.00  | 9.78    |
| Score                   | 0.20   | 0.50   | 1.00   | 0.22   | -0.06  | -0.05   | -0.12   | 1.00    | -0.05   | 1.50    | -0.04   | -0.08   | 0.50    | -0.05   | 0.50    | -0.06   | 0.50    | 1.50                  | 0.50    | 0.50    | -0.05   | 1.50    | -0.06   | 1.50    | 1.50    |
| Ion-type                | PR     | V      | E      | L      |        |         | Y       |         |         | Y1      |         |         | b1      |         | a2      |         | b2      | y7 <sup>+2</sup>      | b3      | b4      |         | y5      |         | y7      | y8      |
| Delta ppm               | 8.2    | 18.4   | 31.1   | -8.1   |        |         | 2.3     |         |         | 12.8    |         |         | -8.5    |         | -18.9   |         | -4.6    | 16.8                  | -8.2    | -5.9    |         | -8.9    |         | -4.1    | -8.8    |

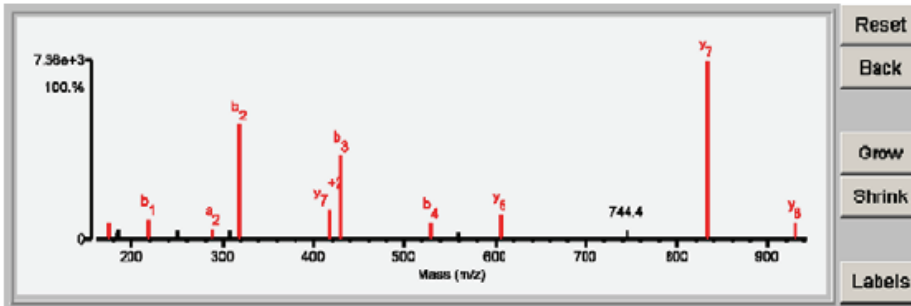

# S20

## Detailed Results

| Rank | Score | SPI (%) | BCS | # Unmatched Ions | Sequence                                                                                                                         | MH <sup>+</sup> Calculated (Da) | MH <sup>+</sup> Error (Da) | MH <sup>+</sup> Error (ppm) | Protein MW/pl (Da) | Species | Accession #            | MS-Digest Index #      | Protein Name                                                       |
|------|-------|---------|-----|------------------|----------------------------------------------------------------------------------------------------------------------------------|---------------------------------|----------------------------|-----------------------------|--------------------|---------|------------------------|------------------------|--------------------------------------------------------------------|
| 1    | 19.64 | 95.8    | 6   | 2/25             | (K) V <sup>+</sup> I <sup>+</sup> F <sup>+</sup> I <sup>+</sup> V <sup>+</sup> H <sup>+</sup> /V <sup>+</sup> R <sup>+</sup> (P) | 973.4924                        | 0.0033                     | 3.4                         | 30654.5/7.10       | HUMAN   | <a href="#">P13598</a> | <a href="#">262037</a> | Intercellular adhesion molecule 2 precursor - Homo sapiens (Human) |

  

| Fragment-ion (m/z)      | 70.064 | 72.082 | 86.097 | 110.071 | 120.081 | 121.083 | 160.078 | 175.119 | 188.074 | 209.136 | 237.134 | 249.125 | 274.186 | 277.116 | 311.171 <sup>+2</sup>             | 335.141 | 348.173              | 366.178 | 393.718         | 394.215            | 411.243 | 464.195 | 510.309 | 639.355 | 786.422 |
|-------------------------|--------|--------|--------|---------|---------|---------|---------|---------|---------|---------|---------|---------|---------|---------|-----------------------------------|---------|----------------------|---------|-----------------|--------------------|---------|---------|---------|---------|---------|
| Frac. Inten. (% of TIC) | 0.00   | 0.42   | 2.00   | 0.24    | 0.80    | 2.21    | 13.69   | 5.50    | 1.38    | 1.74    | 3.14    | 4.13    | 2.51    | 5.09    | 3.58                              | 2.47    | 1.60                 | 1.49    | 4.93            | 3.90               | 7.14    | 1.38    | 12.70   | 0.54    | 8.42    |
| Rel. Inten. (% of BP)   | 0.01   | 3.05   | 14.80  | 1.72    | 5.87    | 18.14   | 100.00  | 40.14   | 10.09   | 12.74   | 22.96   | 30.17   | 18.31   | 37.19   | 26.17                             | 18.04   | 11.70                | 10.90   | 35.98           | 28.62              | 52.18   | 10.07   | 92.75   | 69.70   | 61.48   |
| Score                   | 0.20   | 0.50   | -0.15  | 1.00    | 1.00    | -0.16   | 0.50    | 1.50    | 0.50    | 0.50    | 0.75    | 0.50    | 1.50    | 0.75    | 0.50                              | 0.50    | 0.50                 | 0.75    | 1.50            | 0.50               | 1.50    | 0.50    | 1.50    | 1.50    | 1.50    |
| Ion-type                | PR     | V      |        | H       | F       |         | a1      | y1      | b1      | HV-28   | HV      | FE-28   | y2      | FE      | y5-H <sub>2</sub> O <sup>+2</sup> | b2      | EVH-H <sub>2</sub> O | EVH     | y <sup>+8</sup> | y3-NH <sub>3</sub> | y3      | b3      | y4      | y5      | y6      |
| Delta ppm               | -14.6  | 10.0   |        | -0.7    | -2.3    |         | -12.2   | -2.6    | -7.8    | -23.8   | -7.2    |         | -4.6    | -11.5   | -18.3                             | -7.7    | 16.0                 | -1.9    | 3.3             | -11.0              | -8.9    | 19.6    | -11.3   | -3.1    | -4.8    |

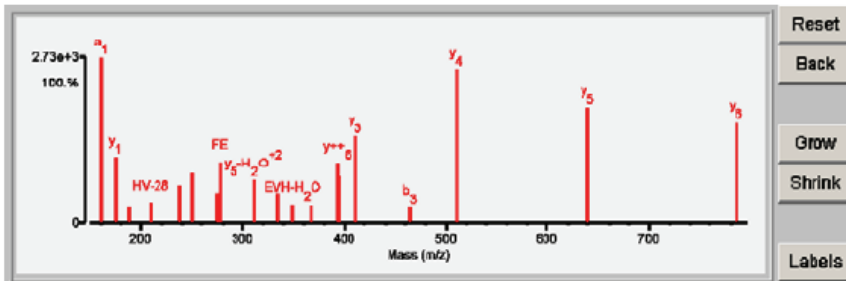

# S21

## Detailed Results

| Rank | Score | SPI (%) | BCS | # Unmatched Ions | Sequence                                      | MH <sup>+</sup> Calculated (Da) | MH <sup>+</sup> Error (Da) | MH <sup>+</sup> Error (ppm) | Protein MW/pl (Da) | Species | Accession #   | MS-Digest Index #                                                                               | Protein Name |
|------|-------|---------|-----|------------------|-----------------------------------------------|---------------------------------|----------------------------|-----------------------------|--------------------|---------|---------------|-------------------------------------------------------------------------------------------------|--------------|
| 1    | 18.86 | 90.9    | 11  | 5/25             | (S) T Q A A I T Q V I V I L N V I P E T R (V) | 1714.8792                       | 0.0017                     | 1.0                         | 54366.5/6.38       | HUMAN   | 075439 341571 | Mitochondrial-processing peptidase subunit beta, mitochondrial precursor - Homo sapiens (Human) |              |

  

| Fragment-ion (m/z)      | 72.081 | 169.132 | 172.039                          | 175.119        | 272.117 | 272.171 | 276.164        | 389.144        | 460.183        | 502.262        | 543.229                          | 561.243        | 601.332        | 708.311 | 715.369        | 725.307 | 788.360        | 826.454        | 887.414        | 927.523        | 1026.587 | 1154.666 | 1196.569                         | 1213.618        | 1255.713        |
|-------------------------|--------|---------|----------------------------------|----------------|---------|---------|----------------|----------------|----------------|----------------|----------------------------------|----------------|----------------|---------|----------------|---------|----------------|----------------|----------------|----------------|----------|----------|----------------------------------|-----------------|-----------------|
| Frac. Inten. (% of TIC) | 0.07   | 1.61    | 4.08                             | 3.55           | 1.75    | 1.89    | 2.71           | 5.69           | 6.92           | 23.06          | 3.18                             | 1.82           | 3.62           | 1.94    | 5.17           | 1.86    | 4.13           | 2.59           | 2.31           | 6.17           | 3.01     | 1.59     | 1.88                             | 5.73            | 3.67            |
| Rel. Inten. (% of BP)   | 0.28   | 7.00    | 17.68                            | 15.38          | 7.61    | 8.18    | 11.77          | 24.65          | 30.00          | 100.00         | 13.80                            | 7.88           | 15.71          | 8.42    | 22.42          | 8.05    | 17.91          | 11.24          | 10.02          | 26.76          | 13.07    | 6.88     | 8.16                             | 24.83           | 15.90           |
| Score                   | 0.50   | -0.07   | 0.25                             | 1.50           | -0.08   | -0.08   | 1.50           | 0.50           | 0.50           | 1.50           | 0.25                             | 0.50           | 1.50           | -0.08   | 1.50           | -0.08   | 0.50           | 1.50           | 0.50           | 1.50           | 1.50     | 1.50     | 0.25                             | 0.50            | 1.50            |
| Ion-type                | V      |         | b <sub>1</sub> -H <sub>2</sub> O | y <sub>1</sub> |         |         | y <sub>2</sub> | b <sub>3</sub> | b <sub>4</sub> | y <sub>4</sub> | b <sub>5</sub> -H <sub>2</sub> O | b <sub>5</sub> | y <sub>6</sub> |         | y <sub>6</sub> |         | b <sub>7</sub> | y <sub>7</sub> | b <sub>8</sub> | y <sub>8</sub> |          |          | b <sub>11</sub> -NH <sub>3</sub> | b <sub>11</sub> | y <sub>11</sub> |
| Delta ppm               | -1.0   |         | -27.2                            | 3.1            |         |         | -11.0          | -16.3          | -8.1           | -0.4           | 8.2                              | 14.4           | 2.8            |         | -6.8           |         | -1.8           | -3.6           | -17.7          | -3.0           | -7.4     | 11.0     | -24.8                            | -6.5            | 10.0            |

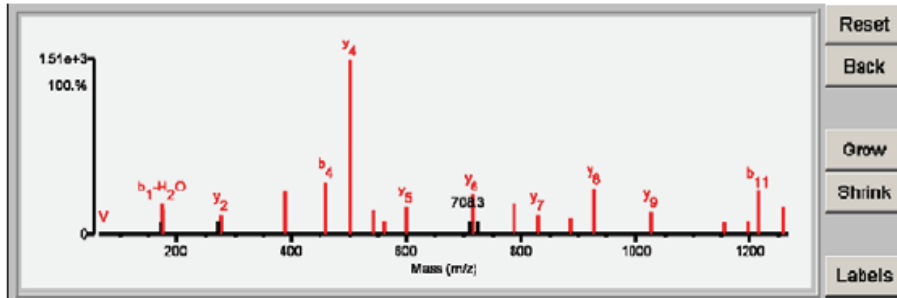

# S22

## Detailed Results

| Rank | Score | SPI (%) | BCS | # Unmatched Ions | Sequence                      | MH <sup>+</sup> Calculated (Da) | MH <sup>+</sup> Error (Da) | MH <sup>+</sup> Error (ppm) | Protein MW/pl (Da) | Species | Accession #   | MS-Digest Index #                                                                                           | Protein Name |
|------|-------|---------|-----|------------------|-------------------------------|---------------------------------|----------------------------|-----------------------------|--------------------|---------|---------------|-------------------------------------------------------------------------------------------------------------|--------------|
| 1    | 12.57 | 74.3    | 7   | 10/25            | (A) G V G G V V H I E P R (Y) | 1009.4884                       | 0.0027                     | 2.7                         | 12058.5/5.47       | HUMAN   | 095178 368021 | NADH dehydrogenase [ubiquinone] 1 beta subcomplex subunit 2, mitochondrial precursor - Homo sapiens (Human) |              |

  

| Fragment-ion (m/z)      | 70.065 | 72.079 | 93.044 | 95.064 | 110.070 | 111.072 | 112.089 | 115.085 | 140.079        | 146.027 | 158.029 | 158.094                         | 175.117        | 251.149 | 260.073        | 272.171        | 273.179 | 324.179 | 326.183 <sup>+2</sup>        | 362.183 | 379.241        | 401.205        | 468.208        | 514.293        | 651.350 |
|-------------------------|--------|--------|--------|--------|---------|---------|---------|---------|----------------|---------|---------|---------------------------------|----------------|---------|----------------|----------------|---------|---------|------------------------------|---------|----------------|----------------|----------------|----------------|---------|
| Frac. Inten. (% of TIC) | 0.01   | 0.09   | 1.78   | 1.88   | 0.55    | 3.00    | 0.08    | 2.30    | 2.05           | 2.76    | 3.87    | 1.80                            | 4.41           | 2.03    | 5.27           | 21.18          | 2.43    | 1.69    | 15.51                        | 3.31    | 3.39           | 4.39           | 1.95           | 6.85           | 7.64    |
| Rel. Inten. (% of BP)   | 0.03   | 0.43   | 8.43   | 8.89   | 2.61    | 14.14   | 0.27    | 10.87   | 9.68           | 13.05   | 18.27   | 7.54                            | 20.84          | 9.57    | 24.88          | 100.00         | 11.45   | 7.99    | 73.24                        | 15.81   | 15.99          | 20.71          | 9.20           | 32.36          | 36.07   |
| Score                   | 0.20   | 0.50   | -0.08  | -0.09  | 1.00    | -0.14   | 0.33    | -0.11   | -0.10          | 0.50    | -0.18   | 0.50                            | 1.50           | 0.75    | 0.50           | 1.50           | -0.11   | -0.08   | 1.50                         | -0.16   | -0.16          | 1.50           | 0.50           | 1.50           | 1.50    |
| Ion-type                | PR     | V      |        |        | H       |         | R       |         | b <sub>1</sub> |         |         | y <sub>1</sub> -NH <sub>3</sub> | y <sub>1</sub> | HI      | b <sub>3</sub> | y <sub>2</sub> |         |         | y <sub>5</sub> <sup>+2</sup> |         | y <sub>3</sub> | a <sub>5</sub> | y <sub>4</sub> | y <sub>5</sub> |         |
| Delta ppm               | -3.2   | -28.8  |        |        | -11.6   |         | 17.6    |         | -10.4          |         |         | 12.0                            | -14.0          | -10.2   | 6.3            | -1.5           |         |         | 3.7                          |         | -22.7          | 8.8            | -9.5           | -11.5          |         |

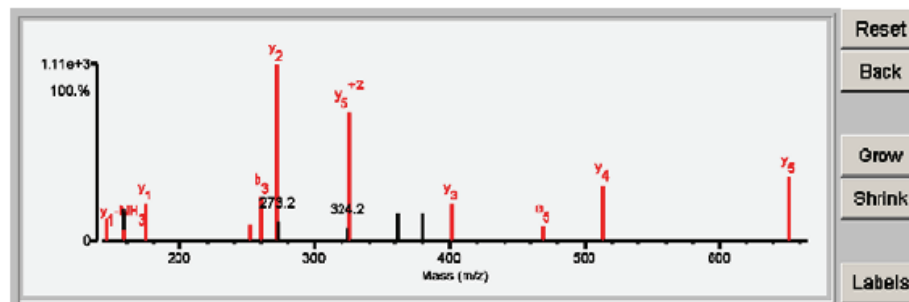

# S23

## Detailed Results

| Rank | Score | SPI (%) | BCS | # Unmatched Ions | Sequence               | MH <sup>+</sup> Calculated (Da) | MH <sup>+</sup> Error (Da) | MH <sup>+</sup> Error (ppm) | Protein MW (kDa) | Species | Accession #            | MS-Digest Index #      | Protein Name                                                                                   |
|------|-------|---------|-----|------------------|------------------------|---------------------------------|----------------------------|-----------------------------|------------------|---------|------------------------|------------------------|------------------------------------------------------------------------------------------------|
| 1    | 23.92 | 100.0   | 8   | 0/25             | (G)AIG(G)A(L)F/V/R (D) | 1015.5142                       | 0.0021                     | 2.1                         | 27391.7/8.21     | HUMAN   | <a href="#">P19404</a> | <a href="#">368451</a> | NADH dehydrogenase [ubiquinone] flavoprotein 2, mitochondrial precursor - Homo sapiens (Human) |

  

| Fragment-ion (m/z)      | 70.066 | 72.080 | 86.096 | 110.069 | 120.083 | 132.048 | 160.043 | 175.117 | 217.065 | 246.093 | 274.086 | 295.153 | 312.176 | 336.200 <sup>+2</sup> | 345.120 | 400.225 <sup>+2</sup> | 411.245 | 428.745         | 458.196 | 558.310 | 654.370 | 671.397 | 742.441 | 799.455 | 856.460 |
|-------------------------|--------|--------|--------|---------|---------|---------|---------|---------|---------|---------|---------|---------|---------|-----------------------|---------|-----------------------|---------|-----------------|---------|---------|---------|---------|---------|---------|---------|
| Frac. Inten. (% of TIC) | 0.00   | 0.08   | 0.22   | 0.10    | 0.07    | 6.63    | 5.02    | 8.69    | 4.55    | 1.75    | 11.30   | 1.92    | 3.08    | 3.08                  | 8.20    | 1.85                  | 6.62    | 3.08            | 1.72    | 13.16   | 1.83    | 9.90    | 2.62    | 1.79    | 2.76    |
| Rel. Inten. (% of BP)   | 0.02   | 0.59   | 1.70   | 0.73    | 0.53    | 50.37   | 38.15   | 66.07   | 34.80   | 13.29   | 85.90   | 14.61   | 23.40   | 23.29                 | 62.32   | 14.05                 | 50.32   | 23.40           | 13.04   | 100.00  | 13.88   | 75.21   | 19.92   | 13.64   | 20.94   |
| Score                   | 0.20   | 0.60   | 0.22   | 1.00    | 1.00    | 0.50    | 0.60    | 1.50    | 0.50    | 0.50    | 0.50    | 0.50    | 1.50    | 1.50                  | 0.50    | 1.50                  | 1.50    | 0.50            | 0.50    | 1.50    | 0.50    | 1.50    | 1.50    | 1.50    | 1.50    |
| Ion-type                | PR     | V      | LI     | H       | F       | a1      | b1      | y1      | b2      | a3      | b3      | y2-NH3  | y2      | y5 <sup>+2</sup>      | b4      | y7 <sup>+2</sup>      | y3      | y <sup>+8</sup> | b5      | y4      | y5-NH3  | y5      | y6      | y7      | y8      |
| Delta ppm               | 8.2    | -5.2   | -6.1   | -18.8   | 16.0    | -8.8    | -3.6    | -11.7   | -1.1    | 5.3     | -4.4    | 5.7     | -6.6    | -9.9                  | -10.5   | -17.5                 | -2.6    | 4.8             | -25.1   | -8.9    | -2.8    | -2.8    | 6.6     | -2.8    | -21.8   |

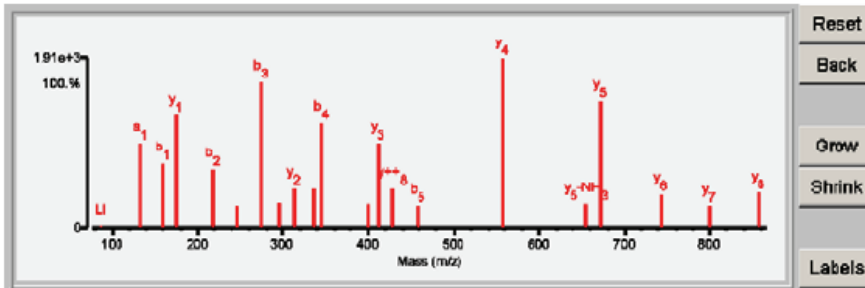

# S24

## Detailed Results

| Rank | Score | SPI (%) | BCS | # Unmatched Ions | Sequence                         | MH <sup>+</sup> Calculated (Da) | MH <sup>+</sup> Error (Da) | MH <sup>+</sup> Error (ppm) | Protein MW (kDa) | Species | Accession #            | MS-Digest Index #      | Protein Name                                                                                          |
|------|-------|---------|-----|------------------|----------------------------------|---------------------------------|----------------------------|-----------------------------|------------------|---------|------------------------|------------------------|-------------------------------------------------------------------------------------------------------|
| 1    | 9.43  | 82.4    | 4   | 14/26            | (E)R/A/G(A)D/T R F F Y R R R (N) | 1471.7434                       | 0.0081                     | 4.2                         | 30241.7/8.88     | HUMAN   | <a href="#">Q75488</a> | <a href="#">388277</a> | NADH dehydrogenase [ubiquinone] iron-sulfur protein 3, mitochondrial precursor - Homo sapiens (Human) |

  

| Fragment-ion (m/z)      | 70.086 | 251.074 | 285.807 | 304.100 | 314.183 | 317.647 | 328.208 <sup>+3</sup> | 387.183 | 408.688 <sup>+3</sup> | 432.814 <sup>+3</sup> | 444.849 | 481.832 <sup>+5</sup> | 488.030 | 476.232 | 482.787 <sup>+2</sup> | 485.177 | 585.776 | 673.281 | 678.290 <sup>+2</sup> | 684.814          | 684.841 <sup>+2</sup> | 804.828 <sup>+2</sup> | 813.340 <sup>+2</sup> | 848.873          | 849.365          |
|-------------------------|--------|---------|---------|---------|---------|---------|-----------------------|---------|-----------------------|-----------------------|---------|-----------------------|---------|---------|-----------------------|---------|---------|---------|-----------------------|------------------|-----------------------|-----------------------|-----------------------|------------------|------------------|
| Frac. Inten. (% of TIC) | 0.00   | 2.45    | 3.10    | 2.41    | 2.29    | 3.29    | 13.55                 | 2.37    | 2.22                  | 13.57                 | 2.70    | 2.37                  | 3.76    | 2.22    | 4.93                  | 2.40    | 2.89    | 2.16    | 2.30                  | 2.83             | 6.42                  | 5.38                  | 8.61                  | 2.33             | 3.52             |
| Rel. Inten. (% of BP)   | 0.02   | 18.03   | 22.83   | 17.74   | 16.87   | 23.82   | 99.82                 | 17.45   | 16.38                 | 100.00                | 19.91   | 17.49                 | 27.70   | 16.35   | 36.33                 | 17.67   | 21.27   | 15.88   | 16.98                 | 20.84            | 47.34                 | 39.61                 | 63.45                 | 17.20            | 25.95            |
| Score                   | 0.20   | -0.18   | -0.23   | 0.50    | -0.17   | -0.24   | 1.50                  | -0.17   | -0.16                 | 1.50                  | -0.20   | 1.50                  | -0.28   | -0.16   | 0.50                  | -0.18   | -0.21   | -0.16   | -0.17                 | 1.50             | 1.50                  | 0.50                  | 1.50                  | 1.50             | -0.25            |
| Ion-type                | PR     |         |         | b3      |         |         | y <sup>+3</sup>       |         |                       | y12 <sup>+3</sup>     |         | y15 <sup>+5</sup>     |         |         | y10-H2O <sup>+2</sup> |         |         |         |                       | y <sup>+10</sup> | y10 <sup>+2</sup>     | y11-NH3 <sup>+2</sup> | y11 <sup>+2</sup>     | y <sup>+12</sup> | y <sup>+12</sup> |
| Delta ppm               | 9.6    |         |         | 8.0     |         |         | 19.9                  |         |                       | 12.2                  |         | 1.5                   |         |         | 6.7                   |         |         |         |                       | -25.2            | 16.9                  | 1.2                   | -2.8                  | 19.9             |                  |

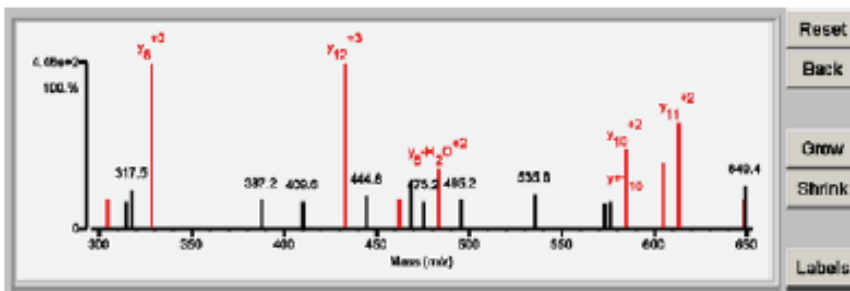

# S25

## Detailed Results

| Rank | Score | SPI (%) | BCS | # Unmatched Ions | Sequence                | MH <sup>+</sup> Calculated (Da) | MH <sup>+</sup> Error (Da) | MH <sup>+</sup> Error (ppm) | Protein MW/pl (Da) | Species | Accession #            | MS-Digest Index #      | Protein Name                           |
|------|-------|---------|-----|------------------|-------------------------|---------------------------------|----------------------------|-----------------------------|--------------------|---------|------------------------|------------------------|----------------------------------------|
| 1    | 13.19 | 77.5    | 6   | 7/25             | (W) E I T Z S R P R (T) | 1004.4466                       | 0.0018                     | 1.7                         | 30540.1/5.86       | HUMAN   | <a href="#">Q13162</a> | <a href="#">431899</a> | Peroxiredoxin-4 - Homo sapiens (Human) |

  

| Fragment-ion (m/z)      | 70.066 | 74.063 | 84.044 | 86.095 | 106.032 | 112.086 | 140.079 | 172.037 | 175.120 | 190.051 | 203.108 | 214.643 | 218.044 | 231.094 | 255.141 | 272.166 | 279.162 | 301.079 | 343.686 | 368.233 | 394.214 | 421.228 | 540.281 | 669.323 | 770.363 |
|-------------------------|--------|--------|--------|--------|---------|---------|---------|---------|---------|---------|---------|---------|---------|---------|---------|---------|---------|---------|---------|---------|---------|---------|---------|---------|---------|
| Frac. Inten. (% of TIC) | 0.01   | 3.99   | 0.10   | 3.39   | 2.63    | 0.09    | 2.78    | 4.91    | 6.74    | 4.02    | 3.14    | 3.03    | 7.43    | 4.80    | 4.85    | 6.08    | 4.17    | 6.23    | 3.21    | 2.47    | 12.17   | 2.31    | 4.49    | 3.77    | 3.17    |
| Rel. Inten. (% of BP)   | 0.07   | 32.74  | 0.84   | 27.85  | 21.62   | 0.77    | 22.81   | 40.33   | 55.42   | 33.03   | 25.83   | 24.91   | 61.04   | 39.48   | 39.84   | 49.93   | 34.28   | 51.17   | 26.41   | 20.33   | 100.00  | 19.02   | 36.86   | 30.99   | 26.07   |
| Score                   | 0.20   | -0.33  | 1.00   | -0.28  | -0.22   | 0.33    | -0.23   | -0.40   | 1.50    | 0.50    | 1.50    | 1.50    | 0.75    | 0.50    | 1.50    | 1.50    | 0.25    | 1.50    | 1.50    | -0.20   | 1.50    | -0.19   | 0.50    | 0.50    | 0.50    |
| Ion-type                | PR     |        | E      |        |         | R       |         |         | y1      | a1      | TE-28   | y++3    | b1      | TE      | y2-NH3  | y2      | y++4    | b2-H2O  | y++5    |         | y++6    | y4-NH3  | y5-NH3  | y6-NH3  |         |
| Delta ppm               | 9.6    |        | -7.0   |        |         | -11.8   |         |         | 6.8     | -18.1   | 20.0    | 12.3    | -22.7   | -22.3   | -17.9   | -19.9   | 2.7     | -23.1   | 10.1    |         | 19.1    |         | -15.3   | -12.5   | -21.5   |

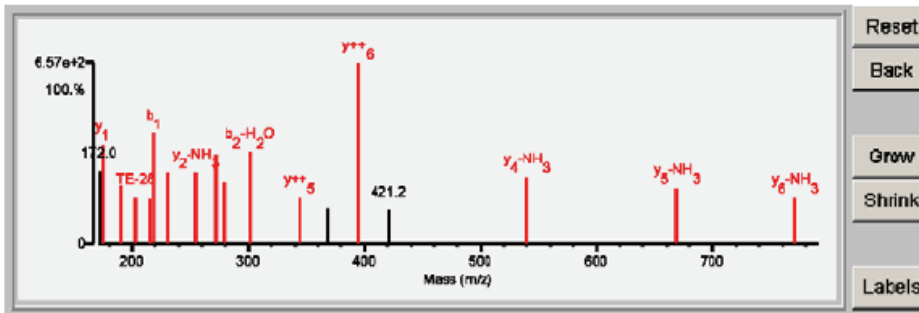

# S26

## Detailed Results

| Rank | Score | SPI (%) | BCS | # Unmatched Ions | Sequence                                | MH <sup>+</sup> Calculated (Da) | MH <sup>+</sup> Error (Da) | MH <sup>+</sup> Error (ppm) | Protein MW/pl (Da) | Species | Accession #            | MS-Digest Index #     | Protein Name                                   |
|------|-------|---------|-----|------------------|-----------------------------------------|---------------------------------|----------------------------|-----------------------------|--------------------|---------|------------------------|-----------------------|------------------------------------------------|
| 1    | 12.03 | 71.3    | 8   | 8/25             | (L) R L P G D C E V C I I S Y L G R (F) | 1655.7338                       | 0.0153                     | 9.2                         | 20256.7/8.69       | HUMAN   | <a href="#">P55145</a> | <a href="#">30621</a> | Protein ARMET precursor - Homo sapiens (Human) |

  

| Fragment-ion (m/z)      | 70.066 | 72.082 | 84.045 | 84.081 | 86.096 | 94.065 | 102.055 | 110.071 | 120.079 | 136.075 | 158.092 | 175.116 | 223.103 | 232.140 | 245.108 | 389.250 | 508.284 | 595.319 | 617.220 <sup>+2</sup> | 620.311 <sup>+2</sup> | 708.402 | 718.269 | 746.259 | 811.412 | 948.328 |
|-------------------------|--------|--------|--------|--------|--------|--------|---------|---------|---------|---------|---------|---------|---------|---------|---------|---------|---------|---------|-----------------------|-----------------------|---------|---------|---------|---------|---------|
| Frac. Inten. (% of TIC) | 0.01   | 0.45   | 0.11   | 2.52   | 0.84   | 3.49   | 0.07    | 4.37    | 6.02    | 0.25    | 5.78    | 8.28    | 2.47    | 3.45    | 4.02    | 2.92    | 8.46    | 11.27   | 2.45                  | 4.47                  | 3.60    | 2.70    | 12.02   | 6.23    | 3.98    |
| Rel. Inten. (% of BP)   | 0.08   | 3.73   | 0.82   | 20.93  | 5.34   | 29.01  | 0.60    | 36.34   | 50.10   | 2.05    | 47.92   | 68.89   | 20.54   | 28.71   | 33.41   | 24.29   | 70.37   | 93.75   | 20.40                 | 37.16                 | 29.94   | 22.46   | 100.00  | 51.81   | 33.13   |
| Score                   | 0.20   | 0.50   | 1.00   | -0.21  | 0.22   | -0.29  |         | -0.36   | -0.50   | 1.00    | 0.50    | 1.50    | -0.21   | 1.50    | -0.24   | 1.50    | 1.50    | 1.50    | -0.20                 | -0.37                 | 1.50    | 0.50    | 0.50    | 1.50    | 0.50    |
| Ion-type                | PR     | V      | E      |        | LI     |        | E       |         |         | Y       | y1-NH3  | y1      |         | y2      | b1      |         | y4      | y6      |                       | y6                    | a6      | b6      | y7      | b8      |         |
| Delta ppm               | 11.1   | 10.0   | 8.4    |        | -8.4   |        |         |         |         | -4.3    | -4.4    | -18.6   |         | -2.7    | 0.9     |         | -6.7    | -1.1    |                       | -2.7                  | 4.4     | -2.6    | -1.0    | -10.4   |         |

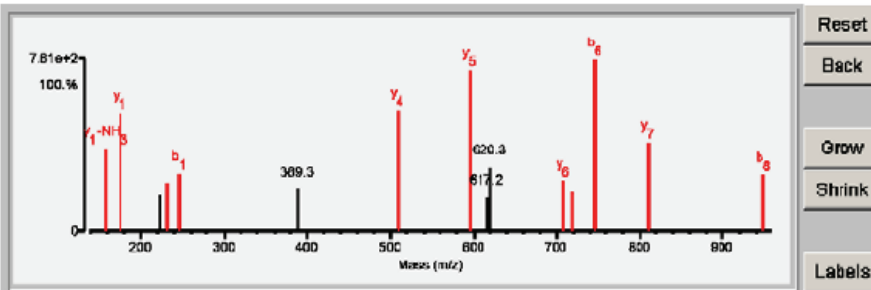

# S27

## Detailed Results

| Rank                    | Score  | SPI (%) | BCS     | # Unmatched Ions | Sequence                                              | MH <sup>+</sup> Calculated (Da) | MH <sup>+</sup> Error (Da) | MH <sup>+</sup> Error (ppm) | Protein MWpl (Da) | Species | Accession # | MS-Digest Index # | Protein Name                                                    |         |                       |                       |         |         |         |         |         |          |          |          |          |
|-------------------------|--------|---------|---------|------------------|-------------------------------------------------------|---------------------------------|----------------------------|-----------------------------|-------------------|---------|-------------|-------------------|-----------------------------------------------------------------|---------|-----------------------|-----------------------|---------|---------|---------|---------|---------|----------|----------|----------|----------|
| 1                       | 23.72  | 100.0   | 11      | 0/26             | (8) D V I L E I L I T I D / D / R / T / E / S / R (0) | 1840.7108                       | 0.0083                     | 2.0                         | 58782.71698       | HUMAN   | P30101      | 408818            | Protein disulfide-isomerase A3 precursor - Homo sapiens (Human) |         |                       |                       |         |         |         |         |         |          |          |          |          |
| Fragment-ion (m/z)      | 72.082 | 88.088  | 175.118 | 243.133          | 282.150                                               | 303.100                         | 342.200                    | 388.190                     | 381.183           | 418.184 | 538.268     | 545.228           | 562.302                                                         | 568.310 | 880.813 <sup>+2</sup> | 888.814 <sup>+2</sup> | 758.367 | 757.390 | 882.364 | 886.388 | 883.403 | 1078.483 | 1088.488 | 1207.621 | 1225.631 |
| Frac. Inten. (% of TIC) | 0.10   | 0.10    | 1.06    | 4.09             | 3.00                                                  | 12.06                           | 1.80                       | 0.87                        | 1.93              | 11.62   | 1.03        | 12.97             | 1.47                                                            | 3.01    | 1.37                  | 1.68                  | 2.30    | 2.35    | 7.11    | 1.27    | 13.52   | 1.14     | 8.00     | 1.21     | 4.95     |
| Rel. Inten. (% of BP)   | 0.71   | 0.75    | 7.81    | 30.22            | 22.16                                                 | 89.21                           | 13.30                      | 6.46                        | 14.31             | 85.91   | 7.63        | 95.91             | 10.84                                                           | 22.26   | 10.15                 | 12.39                 | 16.99   | 17.37   | 52.56   | 9.42    | 100.00  | 8.40     | 55.16    | 8.92     | 36.58    |
| Score                   | 0.50   | 0.22    | 1.50    | 0.75             | 1.50                                                  | 0.50                            | 0.75                       | 0.50                        | 1.50              | 0.50    | 1.50        | 0.50              | 1.50                                                            | 0.50    | 0.50                  | 1.50                  | 0.50    | 1.50    | 0.50    | 1.50    | 0.50    | 1.50     | 0.50     | 1.50     | 0.50     |
| Ion-type                | V      | LI      | y1      | EL               | y2                                                    | b2                              | VLE                        | bs                          | y3                | b3      | yl          | yl                | yl                                                              | yl      | yl                    | yl                    | yl      | yl      | yl      | yl      | yl      | yl       | yl       | yl       | yl       |
| Delta ppm               | 11.4   | -2.6    | -3.2    | -9.2             | -3.4                                                  | -5.7                            | -9.8                       | -2.7                        | -2.5              | -4.5    | -5.7        | -5.6              | -4.0                                                            | -4.0    | 9.9                   | 2.5                   | -4.1    | -2.6    | -5.3    | -7.6    | -3.6    | 2.3      | -1.7     | -1.5     | -1.5     |

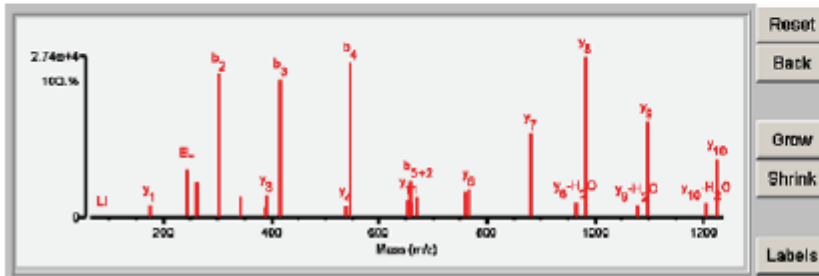

# S28

## Detailed Results

| Rank                    | Score   | SPI (%) | BCS     | # Unmatched Ions | Sequence                                          | MH <sup>+</sup> Calculated (Da) | MH <sup>+</sup> Error (Da) | MH <sup>+</sup> Error (ppm) | Protein MWpl (Da) | Species | Accession # | MS-Digest Index # | Protein Name                                                    |         |         |         |         |         |         |         |          |          |          |          |          |
|-------------------------|---------|---------|---------|------------------|---------------------------------------------------|---------------------------------|----------------------------|-----------------------------|-------------------|---------|-------------|-------------------|-----------------------------------------------------------------|---------|---------|---------|---------|---------|---------|---------|----------|----------|----------|----------|----------|
| 1                       | 18.02   | 94.8    | 8       | 4/25             | (L) Y S S S D D V I R I E I L I T P S N F N R (E) | 2031.8964                       | 0.0311                     | 15.3                        | 48121.61495       | HUMAN   | Q15084      | 406851            | Protein disulfide-isomerase A8 precursor - Homo sapiens (Human) |         |         |         |         |         |         |         |          |          |          |          |          |
| Fragment-ion (m/z)      | 175.120 | 321.085 | 377.138 | 405.135          | 408.122                                           | 440.187                         | 456.140                    | 474.144                     | 492.151           | 591.234 | 637.301     | 704.320           | 734.359                                                         | 743.232 | 791.373 | 835.412 | 842.293 | 893.188 | 948.501 | 955.380 | 1077.543 | 1084.433 | 1190.640 | 1197.463 | 1298.555 |
| Frac. Inten. (% of TIC) | 1.41    | 1.20    | 1.01    | 1.63             | 1.81                                              | 1.28                            | 1.89                       | 1.04                        | 5.58              | 2.74    | 0.93        | 1.38              | 22.20                                                           | 3.93    | 1.10    | 13.97   | 7.50    | 0.90    | 4.44    | 6.68    | 7.31     | 1.78     | 6.17     | 1.03     | 1.33     |
| Rel. Inten. (% of BP)   | 8.33    | 5.39    | 4.58    | 7.38             | 7.27                                              | 5.87                            | 8.52                       | 4.89                        | 25.16             | 12.94   | 4.20        | 6.14              | 100.00                                                          | 17.72   | 4.95    | 62.92   | 33.76   | 4.07    | 19.98   | 30.00   | 32.94    | 8.03     | 27.80    | 4.83     | 6.00     |
| Score                   | 1.50    | 0.25    | 0.75    | 0.75             | 0.25                                              | -0.08                           | -0.09                      | 0.50                        | 0.75              | 1.50    | 0.50        | 0.50              | 0.50                                                            | 0.50    | -0.05   | 1.50    | 0.50    | -0.04   | 1.50    | 0.50    | 1.50     | 0.50     | 0.50     | 0.50     | 0.50     |
| Ion-type                | y1      | b2-H2O  | SSSD    | SSDD             | b3-H2O                                            | SSSDD-H2O                       | SSSDDV                     | yl                          | SSSDDVI           | yl      | yl          | yl                | yl                                                              | yl      | yl      | yl      | yl      | yl      | yl      | yl      | yl       | yl       | yl       | yl       | yl       |
| Delta ppm               | 8.8     | -20.1   | 16.4    | 22.2             | -3.9                                              | -9.0                            | -14.5                      | 11.9                        | -6.7              | 12.9    | 0.9         | 16.1              | 7.2                                                             | 5.4     | 12.2    | 8.2     | 10.2    | 16.4    | 19.4    | -30.2   | 6.2      |          |          |          |          |

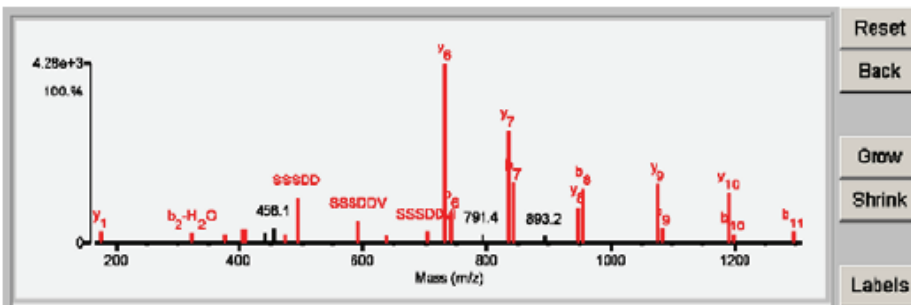

# S29

## Detailed Results

| Rank                    | Score  | SPI (%) | BCS     | # Unmatched Ions | Sequence                        | MH <sup>+</sup> Calculated (Da) | MH <sup>+</sup> Error (Da) | MH <sup>+</sup> Error (ppm) | Protein MWipl (Da) | Species | Accession #            | MS-Digest Index #      | Protein Name                                                 |                       |                       |                                    |                   |         |         |         |         |         |          |          |          |
|-------------------------|--------|---------|---------|------------------|---------------------------------|---------------------------------|----------------------------|-----------------------------|--------------------|---------|------------------------|------------------------|--------------------------------------------------------------|-----------------------|-----------------------|------------------------------------|-------------------|---------|---------|---------|---------|---------|----------|----------|----------|
| 1                       | 28.88  | 98.1    | 11      | 1/25             | (D) A/P/E/E/E/D/I/I/L/V/L/R (K) | 1484.7267                       | 0.0112                     | 7.5                         | 67118.8478         | HUMAN   | <a href="#">P07237</a> | <a href="#">408797</a> | Protein disulfide-isomerase precursor - Homo sapiens (Human) |                       |                       |                                    |                   |         |         |         |         |         |          |          |          |
| Fragment-ion (m/z)      | 70.086 | 175.117 | 198.106 | 227.101          | 288.208                         | 368.145                         | 388.747 <sup>+2</sup>      | 387.271                     | 486.181            | 600.356 | 656.306 <sup>+2</sup>  | 698.422                | 800.212                                                      | 818.828 <sup>+2</sup> | 860.338 <sup>+2</sup> | 868.347 <sup>+2</sup>              | 898.350           | 738.488 | 861.608 | 896.308 | 880.547 | 895.378 | 1108.686 | 1207.527 | 1238.804 |
| Frac. Inten. (% of TIC) | 0.00   | 2.57    | 1.35    | 3.62             | 1.94                            | 2.50                            | 1.05                       | 2.21                        | 1.23               | 3.33    | 2.57                   | 2.01                   | 2.09                                                         | 1.07                  | 1.85                  | 3.42                               | 49.82             | 4.62    | 2.33    | 1.03    | 2.64    | 1.05    | 2.61     | 1.00     | 1.98     |
| Rel. Inten. (% of BP)   | 0.01   | 5.17    | 2.70    | 7.26             | 3.89                            | 5.01                            | 2.11                       | 4.43                        | 2.45               | 6.58    | 5.35                   | 4.04                   | 4.19                                                         | 2.16                  | 3.72                  | 6.85                               | 100.00            | 9.27    | 4.68    | 2.06    | 5.30    | 2.13    | 5.24     | 2.02     | 3.98     |
| Score                   | 0.20   | 1.50    | 0.50    | 0.75             | 1.50                            | 0.75                            | 1.50                       | 1.50                        | 0.75               | 1.50    | 1.50                   | 0.75                   | 1.50                                                         | 0.75                  | 1.50                  | -0.04                              | 0.50              | 1.50    | 1.50    | 0.50    | 1.50    | 0.50    | 1.50     | 0.50     | 1.50     |
| Ion-type                | PR     | y1      | PE-28   | PE               | y0                              | PEE                             | y6 <sup>+2</sup>           | y8                          | PEEE               | y4      | y9 <sup>+2</sup>       | y5                     | PEEED                                                        | y10 <sup>+2</sup>     |                       | y11-H <sub>2</sub> O <sup>+2</sup> | y <sup>++11</sup> | y8      | y7      | b7      | y8      | b8      | y9       | b10      | y10      |
| Delta ppm               | 3.9    | -11.7   | -14.1   | -9.8             | 1.3                             | -6.8                            | 5.0                        | -1.1                        | -15.9              | -0.2    | 7.5                    | -3.5                   | -5.4                                                         | 11.0                  |                       | 5.8                                | 2.3               | 4.9     | -3.9    | -1.5    | -5.8    | -2.5    | 0.3      | -3.4     | -2.5     |

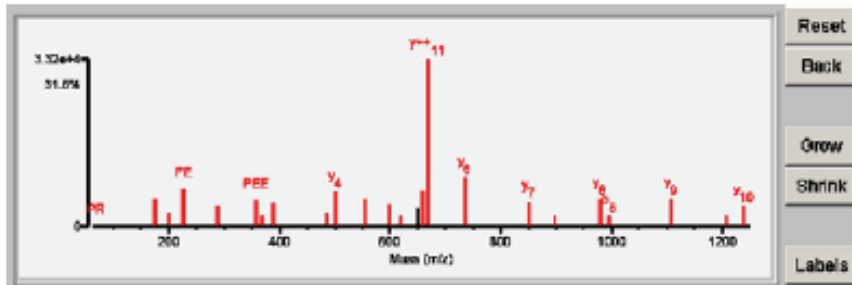

# S30

## Detailed Results

| Rank                    | Score  | SPI (%) | BCS    | # Unmatched Ions | Sequence                                      | MH <sup>+</sup> Calculated (Da) | MH <sup>+</sup> Error (Da) | MH <sup>+</sup> Error (ppm) | Protein MWipl (Da) | Species | Accession #            | MS-Digest Index #      | Protein Name                                      |                       |         |         |                   |         |         |         |         |         |         |         |          |
|-------------------------|--------|---------|--------|------------------|-----------------------------------------------|---------------------------------|----------------------------|-----------------------------|--------------------|---------|------------------------|------------------------|---------------------------------------------------|-----------------------|---------|---------|-------------------|---------|---------|---------|---------|---------|---------|---------|----------|
| 1                       | 22.30  | 98.3    | 9      | 1/25             | (D) G V I G G D I P I A I V I A I L P E R (R) | 1333.6681                       | 0.0004                     | 0.3                         | 57549.21630        | HUMAN   | <a href="#">P49257</a> | <a href="#">309375</a> | Protein ERGIC-53 precursor - Homo sapiens (Human) |                       |         |         |                   |         |         |         |         |         |         |         |          |
| Fragment-ion (m/z)      | 70.066 | 72.081  | 86.097 | 141.103          | 169.096                                       | 175.119                         | 245.095                    | 268.166                     | 302.118            | 329.144 | 339.203                | 391.216                | 409.231                                           | 430.759 <sup>+2</sup> | 474.165 | 522.314 | 545.293           | 571.208 | 593.347 | 642.256 | 692.415 | 741.327 | 763.459 | 860.512 | 1089.574 |
| Frac. Inten. (% of TIC) | 0.00   | 0.40    | 0.05   | 1.69             | 2.88                                          | 3.12                            | 5.89                       | 2.79                        | 2.87               | 4.80    | 2.55                   | 1.72                   | 12.64                                             | 12.42                 | 2.09    | 3.54    | 1.59              | 1.81    | 9.13    | 2.83    | 3.54    | 2.45    | 2.89    | 14.34   | 2.40     |
| Rel. Inten. (% of BP)   | 0.02   | 2.78    | 0.35   | 11.78            | 18.53                                         | 21.74                           | 41.11                      | 19.47                       | 20.02              | 33.47   | 17.76                  | 11.98                  | 88.19                                             | 86.60                 | 14.59   | 24.67   | 11.06             | 12.63   | 63.67   | 19.75   | 24.89   | 17.09   | 18.75   | 100.00  | 16.75    |
| Score                   | 0.20   | 0.50    | 0.22   | 0.50             | 0.75                                          | 1.50                            | 0.50                       | 0.75                        | 0.50               | 0.75    | 0.75                   | -0.12                  | 1.50                                              | 1.50                  | 0.50    | 1.50    | 1.50              | 0.50    | 1.50    | 0.50    | 1.50    | 0.50    | 1.50    | 1.50    | 1.50     |
| Ion-type                | PR     | V       | LI     | PA-28            | PA                                            | y1                              | b2                         | PAV                         | b3                 | VGGD    | PAVA                   | y3                     | y3                                                | y6 <sup>+2</sup>      | b5      | y4      | y <sup>++11</sup> | b6      | y6      | b7      | y6      | b8      | y7      | y8      | y11      |
| Delta ppm               | 5.3    | 8.7     | 0.9    | -3.1             | -11.5                                         | -0.9                            | -4.2                       | -4.3                        | -0.7               | -8.1    | -2.3                   | -0.1                   | -0.1                                              | 0.7                   | -3.8    | -1.5    | -1.1              | -20.3   | -7.4    | -0.4    | -7.2    | 2.8     | 1.9     | 2.2     | -5.2     |

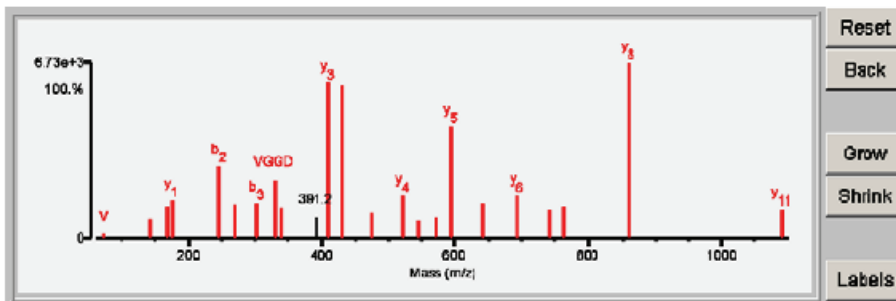

# S31

## Detailed Results

| Rank                    | Score  | SP1 (%) | BC8    | # Unmatched Ions | Sequence                            | MH <sup>+</sup> Calculated (Da) | MH <sup>+</sup> Error (Da) | MH <sup>+</sup> Error (ppm) | Protein MW (Da) | Species | Accession #                                  | MS-Digest Index # | Protein Name                                                                                            |         |         |         |                       |                 |         |                       |         |         |         |         |         |      |
|-------------------------|--------|---------|--------|------------------|-------------------------------------|---------------------------------|----------------------------|-----------------------------|-----------------|---------|----------------------------------------------|-------------------|---------------------------------------------------------------------------------------------------------|---------|---------|---------|-----------------------|-----------------|---------|-----------------------|---------|---------|---------|---------|---------|------|
| 1                       | 22.98  | 97.8    | 10     | 3/26             | (P) I/L/I/P/I/L/V/V/R/Q/I/T/G/R (G) | 1912.7298                       | -0.0048                    | -3.7                        | 30180.28.28     | HUMAN   | <a href="#">Q18740</a> <a href="#">88726</a> |                   | Putative ATP-dependent Clp protease proteolytic subunit, mitochondrial precursor - Homo sapiens (Human) |         |         |         |                       |                 |         |                       |         |         |         |         |         |      |
| Fragment-Ion (m/z)      | 70.085 | 72.081  | 86.086 | 87.089           | 175.118                             | 183.148                         | 184.160                    | 211.143                     | 212.148         | 232.140 | 310.212                                      | 315.173           | 333.187                                                                                                 | 408.279 | 412.225 | 481.246 | 490.781 <sup>+2</sup> | 499.785         | 538.322 | 658.328 <sup>+2</sup> | 690.288 | 699.367 | 788.423 | 901.508 | 988.668 |      |
| Frag. Inten. (% of TIC) | 0.00   | 0.02    | 0.45   | 1.02             | 0.50                                | 5.90                            | 0.66                       | 5.45                        | 0.72            | 0.67    | 3.70                                         | 2.03              | 0.58                                                                                                    | 1.04    | 0.70    | 1.66    | 1.22                  | 37.58           | 0.60    | 2.48                  | 3.61    | 5.98    | 9.31    | 1.69    | 12.43   |      |
| Rel. Inten. (% of BP)   | 0.01   | 0.05    | 1.19   | 2.71             | 1.34                                | 15.71                           | 1.74                       | 14.53                       | 1.52            | 1.79    | 9.85                                         | 5.40              | 1.53                                                                                                    | 2.75    | 1.85    | 4.42    | 3.25                  | 100.00          | 1.60    | 6.59                  | 9.61    | 15.91   | 24.77   | 4.49    | 33.07   |      |
| Score                   | 0.20   | 0.50    | 0.22   | -0.03            | 1.50                                | 0.50                            | -0.02                      | 0.75                        | -0.02           | 1.50    | 0.75                                         | 0.50              | 1.50                                                                                                    | 0.75    | 0.50    | 1.50    | 0.50                  | 1.50            | 0.75    | 1.50                  | 1.50    | 1.50    | 1.50    | 1.50    | 1.50    | 1.50 |
| Ion-type                | PR     | V       | LI     |                  | Y1                                  | P1-28                           |                            | P1                          |                 | Y2      | P1V                                          | b2                | Y3                                                                                                      | P1VV    | b3      | Y4      | b8 <sup>+2</sup>      | Y <sup>+2</sup> | P1VVE   | Y10 <sup>+2</sup>     | Y5      | Y6      | Y7      | Y8      | Y9      |      |
| Delta ppm               | -3.2   | 5.9     | -1.5   |                  | -4.3                                | -12.5                           |                            | -6.1                        |                 | -3.1    | -5.5                                         |                   | -4.5                                                                                                    | -6.7    | -5.9    | -2.5    |                       | -1.0            | -5.6    | -2.4                  | 0.4     | -0.4    | -4.2    | -4.7    | -3.5    |      |

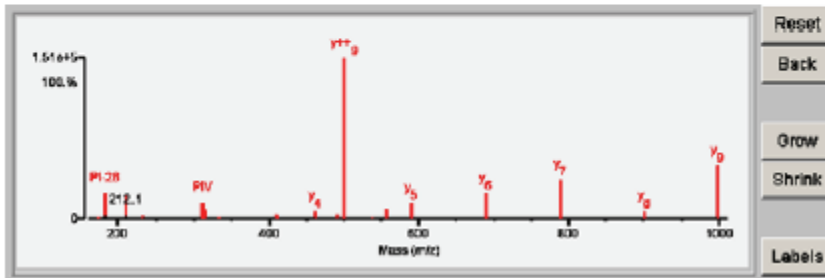

# S32

## Detailed Results

| Rank                    | Score  | SP1 (%) | BC8    | # Unmatched Ions | Sequence                    | MH <sup>+</sup> Calculated (Da) | MH <sup>+</sup> Error (Da) | MH <sup>+</sup> Error (ppm) | Protein MW (Da) | Species | Accession #                                   | MS-Digest Index # | Protein Name                                                                        |         |         |         |         |         |         |         |         |         |         |         |          |      |
|-------------------------|--------|---------|--------|------------------|-----------------------------|---------------------------------|----------------------------|-----------------------------|-----------------|---------|-----------------------------------------------|-------------------|-------------------------------------------------------------------------------------|---------|---------|---------|---------|---------|---------|---------|---------|---------|---------|---------|----------|------|
| 1                       | 17.12  | 81.4    | 8      | 4/25             | (E) E/L/T/T/V/S/L/V/L/R (S) | 1323.8481                       | 0.0117                     | 8.8                         | 17259.89.69     | HUMAN   | <a href="#">Q04857</a> <a href="#">807027</a> |                   | Single-stranded DNA-binding protein, mitochondrial precursor - Homo sapiens (Human) |         |         |         |         |         |         |         |         |         |         |         |          |      |
| Fragment-Ion (m/z)      | 70.087 | 84.041  | 86.086 | 84.084           | 102.056                     | 168.027                         | 175.117                    | 186.092                     | 208.100         | 218.088 | 287.088                                       | 304.181           | 338.120                                                                             | 408.128 | 417.248 | 471.154 | 488.189 | 482.280 | 618.319 | 680.219 | 828.404 | 718.431 | 817.478 | 818.528 | 1019.688 |      |
| Frag. Inten. (% of TIC) | 0.00   | 0.05    | 0.10   | 2.27             | 0.13                        | 2.70                            | 5.54                       | 4.41                        | 2.63            | 2.22    | 6.35                                          | 5.55              | 6.11                                                                                | 1.69    | 5.41    | 1.85    | 5.60    | 2.23    | 4.74    | 3.35    | 4.59    | 9.72    | 10.67   | 8.67    | 3.41     |      |
| Rel. Inten. (% of BP)   | 0.02   | 0.59    | 0.89   | 21.26            | 1.22                        | 25.29                           | 51.93                      | 41.28                       | 24.64           | 20.80   | 59.46                                         | 52.00             | 57.28                                                                               | 15.72   | 50.71   | 17.32   | 52.49   | 20.89   | 44.39   | 31.43   | 43.05   | 91.06   | 100.00  | 81.21   | 32.00    |      |
| Score                   | 0.20   | 0.22    | -0.21  | 1.00             | 0.25                        | 1.50                            | 0.50                       | 0.75                        | -0.21           | 0.25    | 1.50                                          | 0.25              | 0.50                                                                                | 0.50    | 1.50    | -0.17   | 0.25    | -0.21   | 1.50    | 0.25    | 1.50    | 1.50    | 1.50    | 1.50    | 1.50     | 1.50 |
| Ion-type                | PR     | E       | LI     |                  | E                           | b1-H2O                          | Y1                         | TT-H2O                      | TT              |         | b2-H2O                                        | Y2                | b3-H2O                                                                              | b3      | Y3      |         | b4-H2O  |         | Y4      | b5-H2O  | Y5      | Y6      | Y7      | Y8      | Y9       |      |
| Delta ppm               | 26.8   |         | -15.4  |                  | 0.4                         | -5.2                            | -8.9                       | -8.5                        | -19.4           |         | -11.2                                         | -0.8              | 3.6                                                                                 | -0.1    | 5.3     |         | 5.6     |         | 8.9     | 8.2     | 8.6     |         | 1.1     | 0.5     | 0.1      | -6.9 |

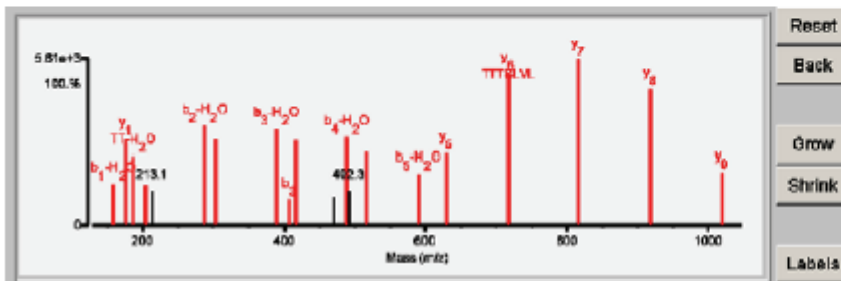



# S33

## Detailed Results

| Rank | Score | SPI (%) | BCS | # Unmatched Ions | Sequence                                  | MH <sup>+</sup> Calculated (Da) | MH <sup>+</sup> Error (Da) | MH <sup>+</sup> Error (ppm) | Protein MW/pl (Da) | Species | Accession #                                   | MS-Digest Index #                                                                                        | Protein Name |
|------|-------|---------|-----|------------------|-------------------------------------------|---------------------------------|----------------------------|-----------------------------|--------------------|---------|-----------------------------------------------|----------------------------------------------------------------------------------------------------------|--------------|
| 1    | 13.11 | 69.8    | 8   | 9/25             | (A) Q I T I A / A / A / T / A / P / R (I) | 974.4724                        | 0.0019                     | 2.0                         | 31629.9/9.03       | HUMAN   | <a href="#">P21912</a> <a href="#">135967</a> | Succinate dehydrogenase [ubiquinone] iron-sulfur subunit, mitochondrial precursor - Homo sapiens (Human) |              |

| Fragment-ion (m/z)      | 70.066 | 74.063 | 84.045 | 86.096 | 172.040 | 173.093 | 175.115 | 217.065 | 255.148 | 272.173 | 300.101 | 318.111 | 326.113 | 326.182 | 343.148 | 343.210 | 354.110 | 371.136 | 425.232 | 441.210 | 444.252 | 515.296 | 586.327 | 657.362 | 758.411 |
|-------------------------|--------|--------|--------|--------|---------|---------|---------|---------|---------|---------|---------|---------|---------|---------|---------|---------|---------|---------|---------|---------|---------|---------|---------|---------|---------|
| Frac. Inten. (% of TIC) | 0.00   | 1.54   | 6.25   | 1.43   | 10.05   | 2.31    | 2.87    | 5.22    | 6.95    | 2.44    | 5.15    | 2.00    | 3.16    | 2.66    | 2.66    | 2.06    | 1.64    | 3.22    | 1.58    | 1.85    | 5.96    | 6.13    | 12.91   | 3.36    | 6.90    |
| Rel. Inten. (% of BP)   | 0.02   | 11.91  | 48.44  | 11.09  | 77.85   | 17.87   | 19.91   | 40.42   | 53.81   | 18.92   | 39.87   | 15.63   | 24.51   | 20.69   | 20.60   | 15.98   | 12.68   | 24.91   | 12.23   | 14.35   | 46.15   | 47.48   | 100.00  | 26.00   | 53.47   |
| Score                   | 0.20   | -0.12  | -0.48  | -0.11  | -0.78   | 0.75    | 1.50    | 0.50    | 0.50    | 1.50    | 0.25    | 0.50    | -0.25   | 0.50    | -0.21   | 1.50    | -0.13   | 0.25    | -0.12   | -0.14   | 1.50    | 1.50    | 1.50    | 1.50    | 1.50    |
| Ion-type                | PR     |        |        |        | TA      | y1      | b1      | y2-NH3  | y2      | b2-H2O  | b2      |         | y3-NH3  |         | y3      |         | b3-H2O  |         |         | y4      | y5      | y6      | y7      | y8      |         |
| Delta ppm               | 5.3    |        |        |        | -3.8    | -20.3   | -2.0    | 11.1    | 4.0     | -4.2    | -5.1    |         | -1.2    |         | 2.8     |         | -10.4   |         |         | -10.4   | 4.6     | -6.9    | -8.4    | -5.7    |         |

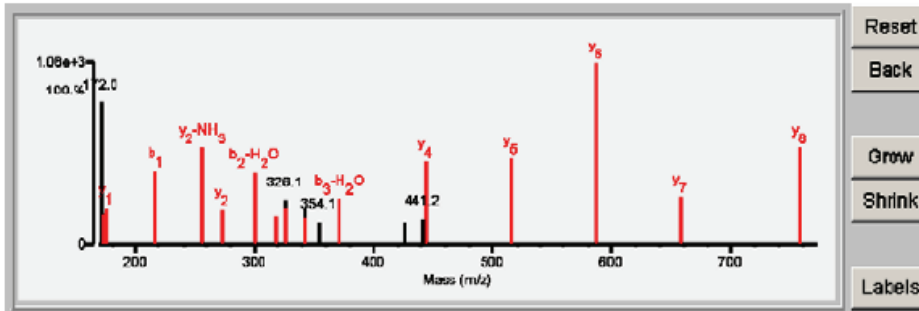

# S34

## Detailed Results

| Rank | Score | SPI (%) | BCS | # Unmatched Ions | Sequence                              | MH <sup>+</sup> Calculated (Da) | MH <sup>+</sup> Error (Da) | MH <sup>+</sup> Error (ppm) | Protein MW/pl (Da) | Species | Accession #                                  | MS-Digest Index #                                                            | Protein Name |
|------|-------|---------|-----|------------------|---------------------------------------|---------------------------------|----------------------------|-----------------------------|--------------------|---------|----------------------------------------------|------------------------------------------------------------------------------|--------------|
| 1    | 15.11 | 79.0    | 6   | 9/25             | (F) K I I P / I / E E / L E D / R (V) | 1464.6861                       | 0.0034                     | 2.3                         | 18929.7/5.30       | HUMAN   | <a href="#">P04234</a> <a href="#">73447</a> | T-cell surface glycoprotein CD3 delta chain precursor - Homo sapiens (Human) |              |

| Fragment-ion (m/z)      | 70.063 | 84.081 | 86.096 | 94.065 | 175.116 | 183.148 | 211.144 | 219.091 | 259.060 | 344.149 | 352.116 | 354.111 | 362.181 | 372.125 | 437.203 | 465.197 | 469.226          | 500.752 <sup>+2</sup> | 532.270 | 551.509 | 557.291 <sup>+2</sup> | 790.342 | 903.464 | 1000.488 | 1113.577 |
|-------------------------|--------|--------|--------|--------|---------|---------|---------|---------|---------|---------|---------|---------|---------|---------|---------|---------|------------------|-----------------------|---------|---------|-----------------------|---------|---------|----------|----------|
| Frac. Inten. (% of TIC) | 0.00   | 1.95   | 0.50   | 4.09   | 3.30    | 3.32    | 2.32    | 1.53    | 2.36    | 2.13    | 8.19    | 2.59    | 1.65    | 2.83    | 1.98    | 2.43    | 1.71             | 14.57                 | 2.10    | 1.93    | 4.30                  | 4.28    | 1.50    | 25.77    | 2.68     |
| Rel. Inten. (% of BP)   | 0.01   | 7.56   | 1.94   | 15.88  | 12.79   | 12.87   | 9.02    | 5.93    | 9.17    | 8.25    | 31.79   | 10.05   | 6.39    | 10.97   | 7.68    | 9.42    | 6.65             | 58.55                 | 8.14    | 7.47    | 16.70                 | 16.61   | 5.83    | 100.00   | 10.42    |
| Score                   | 0.20   | -0.08  | 0.22   | -0.16  | 1.50    | 0.50    | 0.75    | -0.06   | -0.06   | -0.08   | 0.50    | -0.10   | -0.06   | -0.11   | 0.50    | 0.50    | 0.75             | 1.50                  | 1.50    | -0.07   | 1.50                  | 1.50    | 1.50    | 1.50     | 1.50     |
| Ion-type                | PR     |        | LI     |        | y1      | PI-28   | PI      |         |         | b1      |         |         | a2      | b2      | PIEE    |         | y6 <sup>+2</sup> | y4                    | y5      | y6      | y7                    | y8      | y8      | y8       |          |
| Delta ppm               | -24.6  |        | -3.8   |        | -15.1   | -14.1   | -3.3    |         |         | 1.2     |         |         |         | -5.6    | -7.0    | -10.4   |                  | 1.8                   | -4.6    | -4.0    | -20.5                 | 25.0    | -6.3    | -1.7     |          |

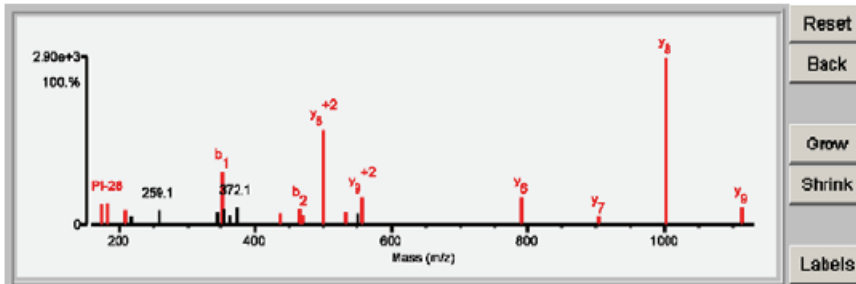



# S35

## Detailed Results

| Rank | Score | SPI (%) | BCS | # Unmatched Ions | Sequence                                          | MH <sup>+</sup> Calculated (Da) | MH <sup>+</sup> Error (Da) | MH <sup>+</sup> Error (ppm) | Protein MW (Da) | Species | Accession #            | MS-Digest Index #      | Protein Name                                                |
|------|-------|---------|-----|------------------|---------------------------------------------------|---------------------------------|----------------------------|-----------------------------|-----------------|---------|------------------------|------------------------|-------------------------------------------------------------|
| 1    | 20.78 | 87.7    | 9   | 2/25             | (T) T F R H I I Q / D / G / P D F / Q / D / R (V) | 1640.7009                       | 0.0190                     | 11.6                        | 18383.418.46    | HUMAN   | <a href="#">Q98767</a> | <a href="#">948813</a> | Thioredoxin, mitochondrial precursor - Homo sapiens (Human) |

  

| Fragment-Ion (m/z)      | 70.085 | 88.086 | 120.081 | 176.118 | 244.091 | 282.119 | 283.111 | 290.147 | 318.112 | 337.119 | 375.197 | 408.161 | 418.206 | 433.160 | 451.163 | 519.229 | 538.252 | 539.234 | 604.248 | 777.351 | 834.379 | 948.408 | 1059.450 | 1077.484 | 1190.645 |     |
|-------------------------|--------|--------|---------|---------|---------|---------|---------|---------|---------|---------|---------|---------|---------|---------|---------|---------|---------|---------|---------|---------|---------|---------|----------|----------|----------|-----|
| Frac. Inten. (% of TIC) | 0.00   | 0.09   | 0.16    | 2.15    | 1.09    | 11.02   | 1.13    | 1.89    | 3.61    | 2.00    | 1.25    | 1.23    | 2.44    | 1.23    | 10.31   | 1.07    | 1.93    | 1.39    | 9.10    | 3.55    | 10.68   | 10.03   | 6.29     | 14.13    | 2.23     |     |
| Rel. Inten. (% of BP)   | 0.01   | 0.62   | 1.14    | 15.23   | 7.72    | 77.95   | 7.88    | 13.37   | 25.57   | 14.12   | 8.87    | 8.71    | 17.25   | 8.71    | 72.95   | 7.59    | 13.68   | 9.80    | 64.42   | 25.10   | 75.59   | 70.96   | 44.47    | 100.00   | 15.76    |     |
| Score                   | 0.20   | 0.22   | 1.00    | 1.50    | 0.75    | 0.75    | 1.50    | 0.50    | 0.75    | 0.50    | 0.75    | -0.08   | 1.50    | 0.25    | 0.50    | -0.08   | 0.50    | 1.50    | 5.10    | 1.50    | 1.50    | 1.50    | 0.50     | 1.50     | 1.50     |     |
| Ion-type                | PR     | LI     | F       | Y1      | GD      | FN      | DF      | Y2      | b2-H2O  | b2      | FNII    | Y3      | b3-H2O  | b3      |         |         |         | aa      | Y++9    | ba      | Y6      | Y7      | Y8       | bs-NH3   | Y9       | Y10 |
| Delta ppm               | -0.4   | 19.4   | 4.4     | -5.4    | -10.2   | -2.3    | 26.1    | 5.5     | -0.3    | -10.5   | -17.3   | 0.8     | -11.6   | -5.9    |         |         |         | -5.1    | 0.7     | -1.0    | -2.6    | 6.3     | 1.6      | 6.3      | 4.0      | 0.9 |

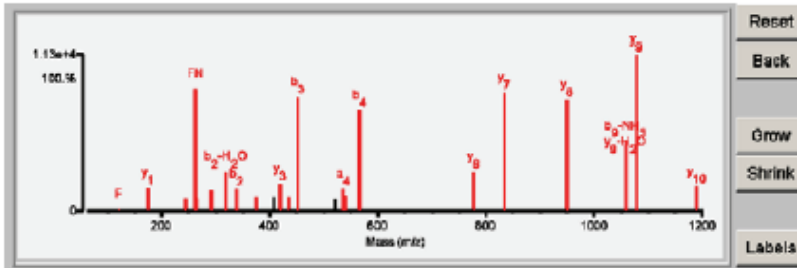

# S36

## Detailed Results

| Rank | Score | SPI (%) | BCS | # Unmatched Ions | Sequence                                                              | MH <sup>+</sup> Calculated (Da) | MH <sup>+</sup> Error (Da) | MH <sup>+</sup> Error (ppm) | Protein MW (Da) | Species | Accession #            | MS-Digest Index #      | Protein Name                                                                     |
|------|-------|---------|-----|------------------|-----------------------------------------------------------------------|---------------------------------|----------------------------|-----------------------------|-----------------|---------|------------------------|------------------------|----------------------------------------------------------------------------------|
| 1    | 14.67 | 78.7    | 9   | 10/25            | (A) G / P / P / P I / Q / I / D / G / E / F T / F / L / P A / G R (K) | 1999.9946                       | 0.0075                     | 3.8                         | 25205.9/4.39    | HUMAN   | <a href="#">Q13445</a> | <a href="#">652083</a> | Transmembrane emp24 domain-containing protein 1 precursor - Homo sapiens (Human) |

  

| Fragment-ion (m/z)      | 70.065 | 84.081 | 86.097 | 243.082 | 288.195 | 298.132 | 371.187 | 400.232 | 513.304 | 533.317 | 550.273 | 615.769+2 | 626.404 | 648.334 | 678.326 | 830.932 | 834.676 | 879.483+2 | 881.473 | 893.100 | 928.006+2 | 958.468 | 968.476 | 1021.600 | 1322.658 |
|-------------------------|--------|--------|--------|---------|---------|---------|---------|---------|---------|---------|---------|-----------|---------|---------|---------|---------|---------|-----------|---------|---------|-----------|---------|---------|----------|----------|
| Frac. Inten. (% of TIC) | 0.00   | 2.25   | 0.07   | 5.28    | 1.67    | 1.58    | 1.65    | 18.89   | 4.41    | 2.09    | 2.12    | 1.63      | 1.56    | 2.45    | 1.68    | 1.64    | 1.69    | 4.81      | 3.69    | 2.56    | 28.12     | 2.26    | 2.31    | 1.77     | 3.83     |
| Rel. Inten. (% of BP)   | 0.01   | 7.99   | 0.24   | 18.80   | 5.98    | 5.61    | 5.88    | 87.17   | 15.70   | 7.45    | 7.55    | 5.80      | 5.58    | 8.71    | 5.97    | 5.82    | 6.01    | 17.09     | 13.11   | 9.11    | 100.00    | 8.02    | 8.22    | 6.28     | 13.63    |
| Score                   | 0.20   | -0.08  | 0.22   | 0.50    | -0.08   | -0.08   | -0.08   | 1.50    | 1.50    | 0.75    | 0.50    | -0.08     | 1.50    | 0.75    | 0.50    | 1.50    | -0.08   | 1.50      | 1.50    | -0.09   | 1.50      | -0.08   | -0.08   | 1.50     | 1.50     |
| Ion-type                | PR     |        | LI     | b2      | Y5      | PPPIQD  | Y4      | Y5      | PPPIQD  | bs      | Y15+2   | Y6        | Y6      | PPPIQD  | b6      | Y++15   |         | Y16+2     |         |         | Y17+2     |         |         | Y9       | Y12      |
| Delta ppm               | -6.1   |        | 7.8    | 3.8     |         |         |         | 5.0     | -20.2   | 13.7    | 3.9     |           | 9.1     | -3.2    | -4.4    |         |         | 20.7      |         |         | 16.6      |         |         | 16.4     | -11.7    |

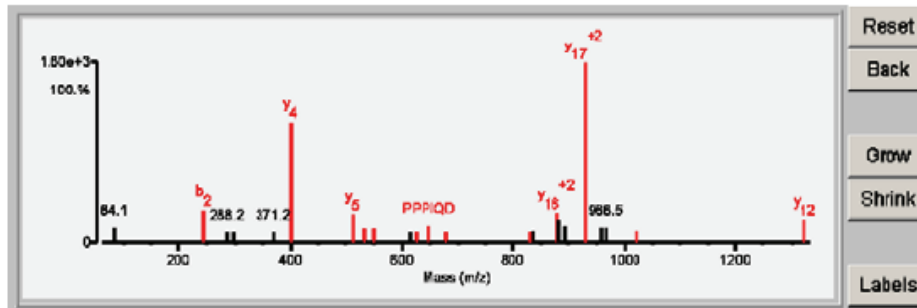

# S37

## Detailed Results

| Rank | Score | SPI (%) | BCS | # Unmatched Ions | Sequence                    | MH <sup>+</sup> Calculated (Da) | MH <sup>+</sup> Error (Da) | MH <sup>+</sup> Error (ppm) | Protein MW (Da) | Species | Accession # | MS-Digest Index # | Protein Name                                                                      |
|------|-------|---------|-----|------------------|-----------------------------|---------------------------------|----------------------------|-----------------------------|-----------------|---------|-------------|-------------------|-----------------------------------------------------------------------------------|
| 1    | 11.84 | 74.6    | 4   | 11/25            | (I) S F R H L P I N S R (K) | 1158.5724                       | -0.0001                    | -0.1                        | 24976.1/6.98    | HUMAN   | P49755      | 652147            | Transmembrane emp24 domain-containing protein 10 precursor - Homo sapiens (Human) |

| Fragment-Ion (m/z)      | 70.066 | 72.081 | 84.047 | 86.096 | 87.044 | 89.061 | 94.065 | 110.071 | 111.076 | 120.079 | 157.122 | 175.117 | 223.156 | 251.147 | 359.163 | 400.222 | 418.741 | 419.176 | 432.165 | 460.162 | 461.153 | 538.295 | 586.329 | 699.416 | 836.472 |
|-------------------------|--------|--------|--------|--------|--------|--------|--------|---------|---------|---------|---------|---------|---------|---------|---------|---------|---------|---------|---------|---------|---------|---------|---------|---------|---------|
| Frac. Inten. (% of TIC) | 0.00   | 2.53   | 1.77   | 0.18   | 2.27   | 3.20   | 1.97   | 0.85    | 2.11    | 0.20    | 1.95    | 2.61    | 2.97    | 3.05    | 2.08    | 2.70    | 1.85    | 2.49    | 5.72    | 9.53    | 1.81    | 2.62    | 30.63   | 11.47   | 3.46    |
| Rel. Inten. (% of BP)   | 0.01   | 8.25   | 5.77   | 0.60   | 7.42   | 10.46  | 6.42   | 2.76    | 6.88    | 0.66    | 6.36    | 8.52    | 9.68    | 9.97    | 6.74    | 8.83    | 6.02    | 8.11    | 18.67   | 31.11   | 5.89    | 8.55    | 100.00  | 37.46   | 11.31   |
| Score                   | 0.20   | -0.08  | -0.06  | 0.22   | -0.07  | -0.10  | -0.06  | 1.00    | -0.07   | 1.00    | -0.06   | 1.50    | 0.50    | 0.75    | 0.50    | -0.09   | 1.50    | -0.08   | 0.50    | 0.50    | -0.06   | -0.09   | 1.50    | 1.50    | 1.50    |
| Ion-type                | PR     |        |        | LI     |        |        |        | H       |         | F       |         | y1      | HL-28   | HL      | y3-NH3  |         | y4+7    |         | a3      | b3      |         |         | y5      | y6      | y7      |
| Delta ppm               | 12.6   |        |        | -2.6   |        |        |        | -1.6    |         | -16.6   |         | -12.3   | -1.6    | -15.7   | -13.2   |         | 2.4     |         | -14.1   | -8.3    |         |         | -3.6    | 2.1     | -1.4    |

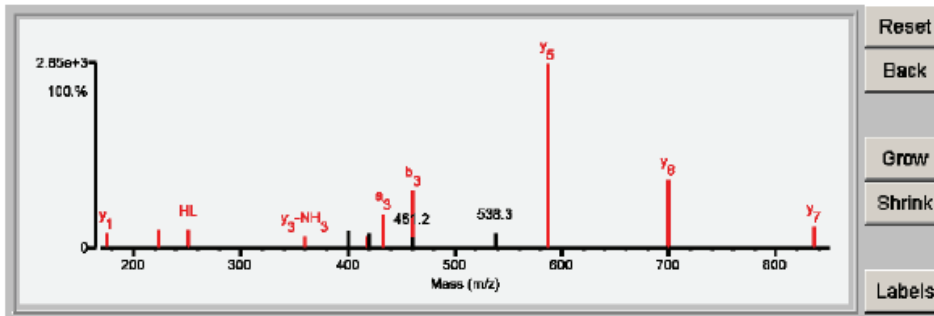

# S38

## Detailed Results

| Rank | Score | SPI (%) | BCS | # Unmatched Ions | Sequence                        | MH <sup>+</sup> Calculated (Da) | MH <sup>+</sup> Error (Da) | MH <sup>+</sup> Error (ppm) | Protein MW (Da) | Species | Accession # | MS-Digest Index # | Protein Name                                              |
|------|-------|---------|-----|------------------|---------------------------------|---------------------------------|----------------------------|-----------------------------|-----------------|---------|-------------|-------------------|-----------------------------------------------------------|
| 1    | 19.83 | 88.0    | 8   | 6/25             | (V) S E R T L T V N T D V R (P) | 1809.8083                       | 0.0030                     | 2.3                         | 18796.3/8.20    | HUMAN   | G988H8      | 107821            | UPF0556 protein C19orf10 precursor - Homo sapiens (Human) |

| Fragment-Ion (m/z)      | 70.066 | 102.056 | 120.080 | 130.048 | 138.075 | 158.027 | 171.112 | 176.118 | 198.104 | 274.188 | 282.144 | 287.070 | 388.216 | 485.282 <sup>+2</sup> | 484.286 <sup>+2</sup> | 503.273 <sup>+2</sup> | 586.280 | 688.208 | 688.217 | 807.318 | 885.288 | 706.387 | 807.486 | 808.487 | 1005.634 |
|-------------------------|--------|---------|---------|---------|---------|---------|---------|---------|---------|---------|---------|---------|---------|-----------------------|-----------------------|-----------------------|---------|---------|---------|---------|---------|---------|---------|---------|----------|
| Frac. Inten. (% of TIC) | 0.01   | 0.14    | 0.10    | 1.80    | 2.58    | 2.32    | 1.85    | 1.89    | 2.65    | 8.42    | 1.55    | 1.99    | 2.24    | 3.05                  | 2.83                  | 20.96                 | 3.27    | 2.61    | 2.67    | 12.67   | 2.82    | 5.24    | 5.47    | 3.14    | 7.32     |
| Rel. Inten. (% of BP)   | 0.02   | 0.67    | 0.47    | 8.60    | 12.30   | 11.08   | 8.83    | 9.00    | 12.63   | 40.20   | 9.30    | 9.48    | 10.68   | 14.73                 | 13.49                 | 100.00                | 15.60   | 12.45   | 12.76   | 60.44   | 13.47   | 25.02   | 26.09   | 14.98   | 34.91    |
| Score                   | 0.20   | 1.00    | 1.00    | -0.09   | -0.12   | 0.25    | 0.75    | 1.50    | 0.75    | 1.50    | -0.09   | 0.25    | 1.50    | -0.15                 | 0.50                  | 1.50                  | -0.12   | 0.25    | 1.50    | 0.25    | 1.50    | 1.50    | 1.50    | 1.50    | 1.50     |
| Ion-type                | PR     | E       | F       |         |         | b1+H2O  | VA      | y1      | PT      | y2      |         | b2+H2O  | y3      | y3+2                  | y3+2                  | y4                    |         | b5+H2O  | y5      | b6+H2O  | y6      | y7      | y7      | y8      | y9       |
| Delta ppm               | 3.5    | -0.5    | -3.1    |         |         | -7.1    | -11.7   | -6.0    | -22.7   | 1.2     |         | -3.9    | 1.3     | -3.3                  | 1.7                   | -4.1                  |         | -3.8    | -1.2    | -1.5    | -1.9    | -1.0    | 3.6     | 3.6     | -2.3     |

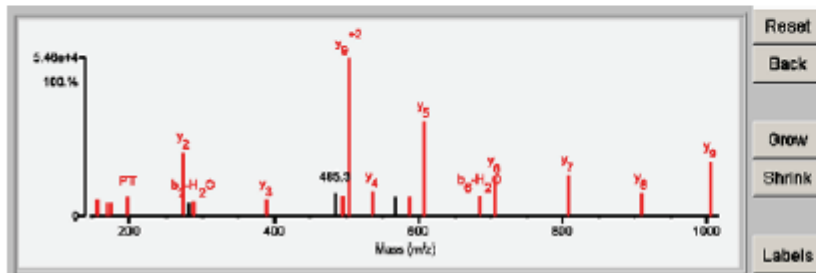

# C1

## Detailed Results

| Rank | Score | SPI (%) | BCS | # Unmatched Ions | Sequence                                       | MH <sup>+</sup> Calculated (Da) | MH <sup>+</sup> Error (Da) | MH <sup>+</sup> Error (ppm) | Protein MW/PI (Da) | Species | Accession # | MS-Digest Index # | Protein Name                                |
|------|-------|---------|-----|------------------|------------------------------------------------|---------------------------------|----------------------------|-----------------------------|--------------------|---------|-------------|-------------------|---------------------------------------------|
| 1    | 15.47 | 64.8    | 8   | 6/25             | (G)V T H T V I P I V E Q V A L P E A I L R (L) | 2238.1740                       | 0.0231                     | 10.3                        | 41737.0/5.29       | HUMAN   | P60709      | 10025             | Actin, cytoplasmic 1 - Homo sapiens (Human) |
| 1    | 15.47 | 64.8    | 8   | 6/25             | (G)V T H T V I P I V E Q V A L P E A I L R (L) | 2238.1740                       | 0.0231                     | 10.3                        | 41793.1/5.31       | HUMAN   | P63261      | 10123             | Actin, cytoplasmic 2 - Homo sapiens (Human) |

  

| Fragment-Ion (m/z)      | 70.064 | 72.081 | 86.097 | 110.071 | 136.075 | 175.119 | 235.125 | 305.197 <sup>+2</sup> | 350.130 | 353.726 <sup>+2</sup> | 436.233                          | 509.230                          | 608.291        | 626.304        | 650.704        | 676.863         | 677.361 <sup>+2</sup> | 684.375 <sup>+2</sup> | 697.331 <sup>+2</sup> | 706.437        | 806.946 <sup>+2</sup> | 819.522        | 836.451        | 890.560        | 1185.555        |
|-------------------------|--------|--------|--------|---------|---------|---------|---------|-----------------------|---------|-----------------------|----------------------------------|----------------------------------|----------------|----------------|----------------|-----------------|-----------------------|-----------------------|-----------------------|----------------|-----------------------|----------------|----------------|----------------|-----------------|
| Frac. Inten. (% of TIC) | 0.01   | 0.09   | 0.32   | 0.11    | 0.48    | 2.29    | 2.25    | 2.41                  | 2.85    | 7.37                  | 2.91                             | 3.01                             | 4.17           | 3.15           | 2.98           | 3.24            | 18.01                 | 2.38                  | 5.63                  | 15.07          | 6.23                  | 3.58           | 2.52           | 3.88           | 5.28            |
| Rel. Inten. (% of BP)   | 0.04   | 0.49   | 1.78   | 0.62    | 2.87    | 12.70   | 12.49   | 13.37                 | 14.89   | 40.94                 | 16.18                            | 16.74                            | 23.17          | 17.51          | 16.57          | 17.98           | 100.00                | 13.25                 | 31.26                 | 83.67          | 34.81                 | 19.91          | 13.99          | 21.45          | 29.52           |
| Score                   | 0.20   | 0.50   | 0.22   | 1.00    | 1.00    | 1.50    | 0.75    | 1.50                  | 0.75    | 1.50                  | -0.16                            | 0.25                             | 0.50           | 0.75           | -0.17          | -0.18           | -1.00                 | -0.13                 | -0.31                 | 1.50           | 1.50                  | 0.50           | 0.50           | 1.50           | 0.50            |
| Ion-type                | PR     | V      | LI     | H       | Y       | Y       | PH      | Y <sup>+2</sup>       | EGY     | Y <sup>+2</sup>       | b <sub>4</sub> -H <sub>2</sub> O | b <sub>5</sub> -H <sub>2</sub> O | b <sub>5</sub> | b <sub>5</sub> | b <sub>5</sub> | Y <sup>+2</sup> | Y <sup>+2</sup>       | Y <sup>+2</sup>       | Y <sup>6</sup>        | Y <sup>6</sup> | Y <sup>6</sup>        | Y <sup>7</sup> | Y <sup>7</sup> | Y <sup>8</sup> | b <sub>10</sub> |
| Delta ppm               | -11.8  | 7.3    | 0.9    | -6.1    | -3.6    | 0.8     | 20.6    | 4.6                   | -17.0   | 13.1                  | 21.8                             | 21.8                             | 8.9            | 9.5            | 30.9           | 32.8            |                       |                       |                       | 0.9            | 0.9                   | -0.2           | 2.3            | 19.7           | 3.1             |

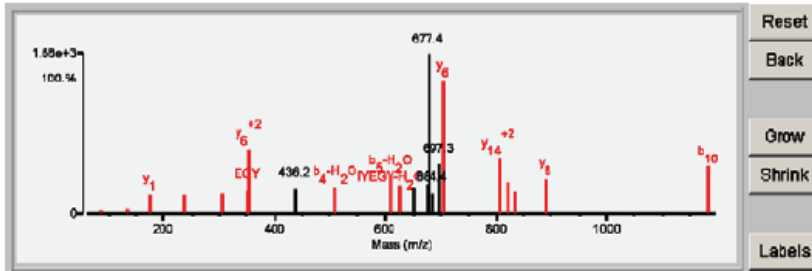

Reset  
Back  
Grow  
Shrink  
Labels

# C2

## Detailed Results

| Rank | Score | SPI (%) | BCS | # Unmatched Ions | Sequence                      | MH <sup>+</sup> Calculated (Da) | MH <sup>+</sup> Error (Da) | MH <sup>+</sup> Error (ppm) | Protein MW/PI (Da) | Species | Accession # | MS-Digest Index # | Protein Name                    |
|------|-------|---------|-----|------------------|-------------------------------|---------------------------------|----------------------------|-----------------------------|--------------------|---------|-------------|-------------------|---------------------------------|
| 1    | 8.89  | 88.8    | 5   | 14/26            | (M) S K R P D L T A A L R (D) | 1284.8282                       | 0.0005                     | 0.4                         | 63588.0/6.21       | HUMAN   | P17881      | 134111            | Desmin - Homo sapiens (Human)   |
| 1    | 8.89  | 88.8    | 5   | 14/26            | (V) S K R P D L T A A L R (D) | 1284.8282                       | 0.0005                     | 0.4                         | 63861.8/6.08       | HUMAN   | P08870      | 888231            | Vimentin - Homo sapiens (Human) |

  

| Fragment-Ion (m/z)      | 70.088 | 84.081 | 88.086 | 88.088 | 84.087 | 118.052        | 148.088        | 144.068 | 213.088        | 218.082        | 237.074        | 328.076        | 368.238        | 385.088        | 418.738 <sup>+2</sup>                          | 421.138                          | 428.747           | 430.271        | 504.783 <sup>+2</sup> | 513.777 <sup>+2</sup> | 531.322        | 810.412        | 758.494        | 858.488        | 1201.640       |
|-------------------------|--------|--------|--------|--------|--------|----------------|----------------|---------|----------------|----------------|----------------|----------------|----------------|----------------|------------------------------------------------|----------------------------------|-------------------|----------------|-----------------------|-----------------------|----------------|----------------|----------------|----------------|----------------|
| Frac. Inten. (% of TIC) | 0.00   | 1.91   | 0.11   | 1.37   | 2.61   | 1.33           | 6.94           | 0.99    | 2.40           | 1.15           | 2.95           | 5.56           | 1.22           | 1.77           | 1.52                                           | 2.24                             | 32.54             | 3.50           | 0.98                  | 3.98                  | 4.20           | 0.90           | 2.69           | 16.15          | 1.00           |
| Rel. Inten. (% of BP)   | 0.01   | 5.88   | 0.33   | 4.21   | 8.00   | 4.07           | 21.31          | 3.04    | 7.39           | 3.54           | 9.08           | 17.09          | 3.75           | 5.42           | 4.66                                           | 6.89                             | 100.00            | 10.74          | 3.00                  | 12.24                 | 12.89          | 2.76           | 8.25           | 49.63          | 3.07           |
| Score                   | 0.20   | -0.06  | 0.22   | -0.04  | -0.08  | -0.04          | -0.21          | -0.03   | 0.75           | -0.04          | -0.09          | -0.17          | 1.50           | -0.05          | 0.50                                           | 0.25                             | 1.50              | 1.50           | -0.03                 | -0.12                 | 1.50           | -0.03          | 1.50           | 1.50           | -0.03          |
| Ion-type                | PR     | LI     | LI     | LI     | LI     | Y <sup>6</sup> | Y <sup>6</sup> | PD      | Y <sup>6</sup> | Y <sup>6</sup> | Y <sup>6</sup> | Y <sup>6</sup> | Y <sup>6</sup> | Y <sup>6</sup> | Y <sup>6</sup> -H <sub>2</sub> O <sup>+2</sup> | b <sub>2</sub> -H <sub>2</sub> O | Y <sup>6</sup> +8 | Y <sup>6</sup> | Y <sup>6</sup>        | Y <sup>6</sup>        | Y <sup>6</sup> | Y <sup>6</sup> | Y <sup>6</sup> | Y <sup>6</sup> | Y <sup>6</sup> |
| Delta ppm               | 9.6    | -18.9  |        |        |        |                |                | 2.9     |                |                |                | -12.3          |                |                | -11.0                                          | -2.3                             | -1.8              | -13.8          |                       |                       | -4.7           |                | -2.1           | -3.5           |                |

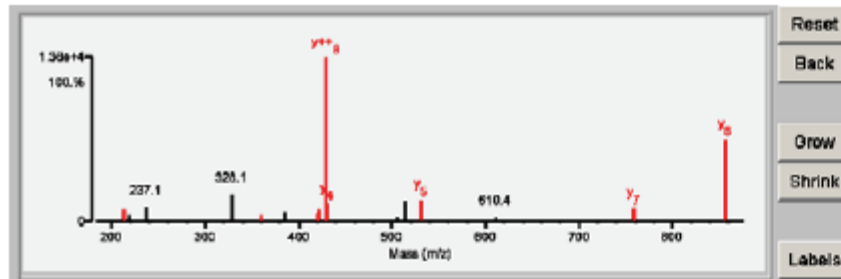

Reset  
Back  
Grow  
Shrink  
Labels

### C3

#### Detailed Results

| Rank                                                                                                                                                                                                                                                                                                                                                                                                                                                                                                                                                                                                                                                                                                                                                                                                                                                                                                                                                                                                                                                                                                                                                                                                                                                                                                                                                                                                                                                                                                                                                                                                                                                                                                                                                                                                                                                                                                                                                                                                                                                                                                                                                                                                                                                                                                                                                                                                                                                                                                                                                                             | Score   | SPI (%) | BCS     | # Unmatched Ions | Sequence                                                          | MH <sup>+</sup> Calculated (Da) | MH <sup>+</sup> Error (Da) | MH <sup>+</sup> Error (ppm) | Protein MW/pI (Da) | Species               | Accession # | MS-Digest Index # | Protein Name                                                     |                    |          |                        |                        |          |                      |                        |          |          |          |                       |          |         |          |          |          |                        |                        |          |          |                        |          |          |          |          |          |                         |      |      |      |      |      |      |      |       |      |      |       |      |      |      |      |      |      |      |      |      |      |      |      |      |      |                       |      |       |      |      |       |       |       |        |       |       |       |      |       |       |       |      |       |       |       |       |       |       |       |       |      |       |      |       |       |       |      |      |      |      |      |       |      |       |      |      |       |       |      |      |      |       |      |       |      |      |       |          |    |  |  |  |    |    |    |    |    |  |    |  |                      |    |  |  |                   |     |                      |  |     |  |     |     |  |           |     |  |  |  |     |       |      |      |      |  |      |  |     |     |  |  |     |      |      |  |       |  |     |       |  |
|----------------------------------------------------------------------------------------------------------------------------------------------------------------------------------------------------------------------------------------------------------------------------------------------------------------------------------------------------------------------------------------------------------------------------------------------------------------------------------------------------------------------------------------------------------------------------------------------------------------------------------------------------------------------------------------------------------------------------------------------------------------------------------------------------------------------------------------------------------------------------------------------------------------------------------------------------------------------------------------------------------------------------------------------------------------------------------------------------------------------------------------------------------------------------------------------------------------------------------------------------------------------------------------------------------------------------------------------------------------------------------------------------------------------------------------------------------------------------------------------------------------------------------------------------------------------------------------------------------------------------------------------------------------------------------------------------------------------------------------------------------------------------------------------------------------------------------------------------------------------------------------------------------------------------------------------------------------------------------------------------------------------------------------------------------------------------------------------------------------------------------------------------------------------------------------------------------------------------------------------------------------------------------------------------------------------------------------------------------------------------------------------------------------------------------------------------------------------------------------------------------------------------------------------------------------------------------|---------|---------|---------|------------------|-------------------------------------------------------------------|---------------------------------|----------------------------|-----------------------------|--------------------|-----------------------|-------------|-------------------|------------------------------------------------------------------|--------------------|----------|------------------------|------------------------|----------|----------------------|------------------------|----------|----------|----------|-----------------------|----------|---------|----------|----------|----------|------------------------|------------------------|----------|----------|------------------------|----------|----------|----------|----------|----------|-------------------------|------|------|------|------|------|------|------|-------|------|------|-------|------|------|------|------|------|------|------|------|------|------|------|------|------|------|-----------------------|------|-------|------|------|-------|-------|-------|--------|-------|-------|-------|------|-------|-------|-------|------|-------|-------|-------|-------|-------|-------|-------|-------|------|-------|------|-------|-------|-------|------|------|------|------|------|-------|------|-------|------|------|-------|-------|------|------|------|-------|------|-------|------|------|-------|----------|----|--|--|--|----|----|----|----|----|--|----|--|----------------------|----|--|--|-------------------|-----|----------------------|--|-----|--|-----|-----|--|-----------|-----|--|--|--|-----|-------|------|------|------|--|------|--|-----|-----|--|--|-----|------|------|--|-------|--|-----|-------|--|
| 1                                                                                                                                                                                                                                                                                                                                                                                                                                                                                                                                                                                                                                                                                                                                                                                                                                                                                                                                                                                                                                                                                                                                                                                                                                                                                                                                                                                                                                                                                                                                                                                                                                                                                                                                                                                                                                                                                                                                                                                                                                                                                                                                                                                                                                                                                                                                                                                                                                                                                                                                                                                | 13.96   | 78.9    | 11      | 10/25            | (F) L / G Q D D R G V R E / V / I L / Y / P A R / L / I R / R (L) | 2402.1392                       | -0.0050                    | -2.1                        | 26047.04/4.94      | HUMAN                 | Q9BRT9      | 596583            | DNA replication complex GINS protein SLD5 - Homo sapiens (Human) |                    |          |                        |                        |          |                      |                        |          |          |          |                       |          |         |          |          |          |                        |                        |          |          |                        |          |          |          |          |          |                         |      |      |      |      |      |      |      |       |      |      |       |      |      |      |      |      |      |      |      |      |      |      |      |      |      |                       |      |       |      |      |       |       |       |        |       |       |       |      |       |       |       |      |       |       |       |       |       |       |       |       |      |       |      |       |       |       |      |      |      |      |      |       |      |       |      |      |       |       |      |      |      |       |      |       |      |      |       |          |    |  |  |  |    |    |    |    |    |  |    |  |                      |    |  |  |                   |     |                      |  |     |  |     |     |  |           |     |  |  |  |     |       |      |      |      |  |      |  |     |     |  |  |     |      |      |  |       |  |     |       |  |
| <table border="1"> <thead> <tr> <th>Fragment-Ion (m/z)</th> <th>175.119</th> <th>251.072</th> <th>349.153</th> <th>369.096</th> <th>417.290</th> <th>530.323</th> <th>618.259</th> <th>827.460</th> <th>905.355</th> <th>912.856<sup>+2</sup></th> <th>928.501</th> <th>962.436</th> <th>1016.368</th> <th>1041.800</th> <th>1096.480</th> <th>1095.601<sup>+2</sup></th> <th>1101.026<sup>+2</sup></th> <th>1140.655</th> <th>1145.420</th> <th>1156.026<sup>+2</sup></th> <th>1163.405</th> <th>1204.569</th> <th>1262.497</th> <th>1361.537</th> <th>1362.562</th> </tr> </thead> <tbody> <tr> <td>Frac. Inten. (% of TIC)</td> <td>1.94</td> <td>2.35</td> <td>1.88</td> <td>1.82</td> <td>2.25</td> <td>2.89</td> <td>3.19</td> <td>20.34</td> <td>2.34</td> <td>2.28</td> <td>11.22</td> <td>2.02</td> <td>2.11</td> <td>7.18</td> <td>2.08</td> <td>1.89</td> <td>4.45</td> <td>5.93</td> <td>2.27</td> <td>2.53</td> <td>3.72</td> <td>2.23</td> <td>5.05</td> <td>4.06</td> <td>1.95</td> </tr> <tr> <td>Rel. Inten. (% of BP)</td> <td>9.53</td> <td>11.69</td> <td>9.24</td> <td>8.95</td> <td>11.07</td> <td>14.21</td> <td>15.70</td> <td>100.00</td> <td>11.51</td> <td>11.21</td> <td>55.15</td> <td>9.93</td> <td>10.37</td> <td>35.31</td> <td>10.24</td> <td>9.25</td> <td>21.85</td> <td>29.14</td> <td>11.15</td> <td>12.42</td> <td>18.30</td> <td>10.97</td> <td>24.80</td> <td>19.95</td> <td>9.60</td> </tr> <tr> <td>Score</td> <td>1.50</td> <td>-0.12</td> <td>-0.09</td> <td>-0.09</td> <td>1.50</td> <td>1.50</td> <td>0.50</td> <td>1.50</td> <td>0.50</td> <td>-0.11</td> <td>1.50</td> <td>-0.10</td> <td>0.25</td> <td>1.50</td> <td>-0.09</td> <td>-0.09</td> <td>1.50</td> <td>1.50</td> <td>0.25</td> <td>-0.12</td> <td>0.50</td> <td>-0.11</td> <td>0.50</td> <td>0.50</td> <td>-0.10</td> </tr> <tr> <td>Ion-type</td> <td>y1</td> <td></td> <td></td> <td></td> <td>y5</td> <td>y4</td> <td>b3</td> <td>y7</td> <td>b9</td> <td></td> <td>y8</td> <td></td> <td>b10-H<sub>2</sub>O</td> <td>y9</td> <td></td> <td></td> <td>y21<sup>+2</sup></td> <td>y10</td> <td>b11-H<sub>2</sub>O</td> <td></td> <td>b11</td> <td></td> <td>b12</td> <td>b13</td> <td></td> </tr> <tr> <td>Delta ppm</td> <td>0.3</td> <td></td> <td></td> <td></td> <td>9.8</td> <td>-12.6</td> <td>-0.7</td> <td>-3.2</td> <td>26.1</td> <td></td> <td>-0.7</td> <td></td> <td>4.5</td> <td>5.5</td> <td></td> <td></td> <td>4.0</td> <td>-6.1</td> <td>11.8</td> <td></td> <td>-10.0</td> <td></td> <td>9.2</td> <td>-11.9</td> <td></td> </tr> </tbody> </table> |         |         |         |                  |                                                                   |                                 |                            |                             |                    |                       |             |                   |                                                                  | Fragment-Ion (m/z) | 175.119  | 251.072                | 349.153                | 369.096  | 417.290              | 530.323                | 618.259  | 827.460  | 905.355  | 912.856 <sup>+2</sup> | 928.501  | 962.436 | 1016.368 | 1041.800 | 1096.480 | 1095.601 <sup>+2</sup> | 1101.026 <sup>+2</sup> | 1140.655 | 1145.420 | 1156.026 <sup>+2</sup> | 1163.405 | 1204.569 | 1262.497 | 1361.537 | 1362.562 | Frac. Inten. (% of TIC) | 1.94 | 2.35 | 1.88 | 1.82 | 2.25 | 2.89 | 3.19 | 20.34 | 2.34 | 2.28 | 11.22 | 2.02 | 2.11 | 7.18 | 2.08 | 1.89 | 4.45 | 5.93 | 2.27 | 2.53 | 3.72 | 2.23 | 5.05 | 4.06 | 1.95 | Rel. Inten. (% of BP) | 9.53 | 11.69 | 9.24 | 8.95 | 11.07 | 14.21 | 15.70 | 100.00 | 11.51 | 11.21 | 55.15 | 9.93 | 10.37 | 35.31 | 10.24 | 9.25 | 21.85 | 29.14 | 11.15 | 12.42 | 18.30 | 10.97 | 24.80 | 19.95 | 9.60 | Score | 1.50 | -0.12 | -0.09 | -0.09 | 1.50 | 1.50 | 0.50 | 1.50 | 0.50 | -0.11 | 1.50 | -0.10 | 0.25 | 1.50 | -0.09 | -0.09 | 1.50 | 1.50 | 0.25 | -0.12 | 0.50 | -0.11 | 0.50 | 0.50 | -0.10 | Ion-type | y1 |  |  |  | y5 | y4 | b3 | y7 | b9 |  | y8 |  | b10-H <sub>2</sub> O | y9 |  |  | y21 <sup>+2</sup> | y10 | b11-H <sub>2</sub> O |  | b11 |  | b12 | b13 |  | Delta ppm | 0.3 |  |  |  | 9.8 | -12.6 | -0.7 | -3.2 | 26.1 |  | -0.7 |  | 4.5 | 5.5 |  |  | 4.0 | -6.1 | 11.8 |  | -10.0 |  | 9.2 | -11.9 |  |
| Fragment-Ion (m/z)                                                                                                                                                                                                                                                                                                                                                                                                                                                                                                                                                                                                                                                                                                                                                                                                                                                                                                                                                                                                                                                                                                                                                                                                                                                                                                                                                                                                                                                                                                                                                                                                                                                                                                                                                                                                                                                                                                                                                                                                                                                                                                                                                                                                                                                                                                                                                                                                                                                                                                                                                               | 175.119 | 251.072 | 349.153 | 369.096          | 417.290                                                           | 530.323                         | 618.259                    | 827.460                     | 905.355            | 912.856 <sup>+2</sup> | 928.501     | 962.436           | 1016.368                                                         | 1041.800           | 1096.480 | 1095.601 <sup>+2</sup> | 1101.026 <sup>+2</sup> | 1140.655 | 1145.420             | 1156.026 <sup>+2</sup> | 1163.405 | 1204.569 | 1262.497 | 1361.537              | 1362.562 |         |          |          |          |                        |                        |          |          |                        |          |          |          |          |          |                         |      |      |      |      |      |      |      |       |      |      |       |      |      |      |      |      |      |      |      |      |      |      |      |      |      |                       |      |       |      |      |       |       |       |        |       |       |       |      |       |       |       |      |       |       |       |       |       |       |       |       |      |       |      |       |       |       |      |      |      |      |      |       |      |       |      |      |       |       |      |      |      |       |      |       |      |      |       |          |    |  |  |  |    |    |    |    |    |  |    |  |                      |    |  |  |                   |     |                      |  |     |  |     |     |  |           |     |  |  |  |     |       |      |      |      |  |      |  |     |     |  |  |     |      |      |  |       |  |     |       |  |
| Frac. Inten. (% of TIC)                                                                                                                                                                                                                                                                                                                                                                                                                                                                                                                                                                                                                                                                                                                                                                                                                                                                                                                                                                                                                                                                                                                                                                                                                                                                                                                                                                                                                                                                                                                                                                                                                                                                                                                                                                                                                                                                                                                                                                                                                                                                                                                                                                                                                                                                                                                                                                                                                                                                                                                                                          | 1.94    | 2.35    | 1.88    | 1.82             | 2.25                                                              | 2.89                            | 3.19                       | 20.34                       | 2.34               | 2.28                  | 11.22       | 2.02              | 2.11                                                             | 7.18               | 2.08     | 1.89                   | 4.45                   | 5.93     | 2.27                 | 2.53                   | 3.72     | 2.23     | 5.05     | 4.06                  | 1.95     |         |          |          |          |                        |                        |          |          |                        |          |          |          |          |          |                         |      |      |      |      |      |      |      |       |      |      |       |      |      |      |      |      |      |      |      |      |      |      |      |      |      |                       |      |       |      |      |       |       |       |        |       |       |       |      |       |       |       |      |       |       |       |       |       |       |       |       |      |       |      |       |       |       |      |      |      |      |      |       |      |       |      |      |       |       |      |      |      |       |      |       |      |      |       |          |    |  |  |  |    |    |    |    |    |  |    |  |                      |    |  |  |                   |     |                      |  |     |  |     |     |  |           |     |  |  |  |     |       |      |      |      |  |      |  |     |     |  |  |     |      |      |  |       |  |     |       |  |
| Rel. Inten. (% of BP)                                                                                                                                                                                                                                                                                                                                                                                                                                                                                                                                                                                                                                                                                                                                                                                                                                                                                                                                                                                                                                                                                                                                                                                                                                                                                                                                                                                                                                                                                                                                                                                                                                                                                                                                                                                                                                                                                                                                                                                                                                                                                                                                                                                                                                                                                                                                                                                                                                                                                                                                                            | 9.53    | 11.69   | 9.24    | 8.95             | 11.07                                                             | 14.21                           | 15.70                      | 100.00                      | 11.51              | 11.21                 | 55.15       | 9.93              | 10.37                                                            | 35.31              | 10.24    | 9.25                   | 21.85                  | 29.14    | 11.15                | 12.42                  | 18.30    | 10.97    | 24.80    | 19.95                 | 9.60     |         |          |          |          |                        |                        |          |          |                        |          |          |          |          |          |                         |      |      |      |      |      |      |      |       |      |      |       |      |      |      |      |      |      |      |      |      |      |      |      |      |      |                       |      |       |      |      |       |       |       |        |       |       |       |      |       |       |       |      |       |       |       |       |       |       |       |       |      |       |      |       |       |       |      |      |      |      |      |       |      |       |      |      |       |       |      |      |      |       |      |       |      |      |       |          |    |  |  |  |    |    |    |    |    |  |    |  |                      |    |  |  |                   |     |                      |  |     |  |     |     |  |           |     |  |  |  |     |       |      |      |      |  |      |  |     |     |  |  |     |      |      |  |       |  |     |       |  |
| Score                                                                                                                                                                                                                                                                                                                                                                                                                                                                                                                                                                                                                                                                                                                                                                                                                                                                                                                                                                                                                                                                                                                                                                                                                                                                                                                                                                                                                                                                                                                                                                                                                                                                                                                                                                                                                                                                                                                                                                                                                                                                                                                                                                                                                                                                                                                                                                                                                                                                                                                                                                            | 1.50    | -0.12   | -0.09   | -0.09            | 1.50                                                              | 1.50                            | 0.50                       | 1.50                        | 0.50               | -0.11                 | 1.50        | -0.10             | 0.25                                                             | 1.50               | -0.09    | -0.09                  | 1.50                   | 1.50     | 0.25                 | -0.12                  | 0.50     | -0.11    | 0.50     | 0.50                  | -0.10    |         |          |          |          |                        |                        |          |          |                        |          |          |          |          |          |                         |      |      |      |      |      |      |      |       |      |      |       |      |      |      |      |      |      |      |      |      |      |      |      |      |      |                       |      |       |      |      |       |       |       |        |       |       |       |      |       |       |       |      |       |       |       |       |       |       |       |       |      |       |      |       |       |       |      |      |      |      |      |       |      |       |      |      |       |       |      |      |      |       |      |       |      |      |       |          |    |  |  |  |    |    |    |    |    |  |    |  |                      |    |  |  |                   |     |                      |  |     |  |     |     |  |           |     |  |  |  |     |       |      |      |      |  |      |  |     |     |  |  |     |      |      |  |       |  |     |       |  |
| Ion-type                                                                                                                                                                                                                                                                                                                                                                                                                                                                                                                                                                                                                                                                                                                                                                                                                                                                                                                                                                                                                                                                                                                                                                                                                                                                                                                                                                                                                                                                                                                                                                                                                                                                                                                                                                                                                                                                                                                                                                                                                                                                                                                                                                                                                                                                                                                                                                                                                                                                                                                                                                         | y1      |         |         |                  | y5                                                                | y4                              | b3                         | y7                          | b9                 |                       | y8          |                   | b10-H <sub>2</sub> O                                             | y9                 |          |                        | y21 <sup>+2</sup>      | y10      | b11-H <sub>2</sub> O |                        | b11      |          | b12      | b13                   |          |         |          |          |          |                        |                        |          |          |                        |          |          |          |          |          |                         |      |      |      |      |      |      |      |       |      |      |       |      |      |      |      |      |      |      |      |      |      |      |      |      |      |                       |      |       |      |      |       |       |       |        |       |       |       |      |       |       |       |      |       |       |       |       |       |       |       |       |      |       |      |       |       |       |      |      |      |      |      |       |      |       |      |      |       |       |      |      |      |       |      |       |      |      |       |          |    |  |  |  |    |    |    |    |    |  |    |  |                      |    |  |  |                   |     |                      |  |     |  |     |     |  |           |     |  |  |  |     |       |      |      |      |  |      |  |     |     |  |  |     |      |      |  |       |  |     |       |  |
| Delta ppm                                                                                                                                                                                                                                                                                                                                                                                                                                                                                                                                                                                                                                                                                                                                                                                                                                                                                                                                                                                                                                                                                                                                                                                                                                                                                                                                                                                                                                                                                                                                                                                                                                                                                                                                                                                                                                                                                                                                                                                                                                                                                                                                                                                                                                                                                                                                                                                                                                                                                                                                                                        | 0.3     |         |         |                  | 9.8                                                               | -12.6                           | -0.7                       | -3.2                        | 26.1               |                       | -0.7        |                   | 4.5                                                              | 5.5                |          |                        | 4.0                    | -6.1     | 11.8                 |                        | -10.0    |          | 9.2      | -11.9                 |          |         |          |          |          |                        |                        |          |          |                        |          |          |          |          |          |                         |      |      |      |      |      |      |      |       |      |      |       |      |      |      |      |      |      |      |      |      |      |      |      |      |      |                       |      |       |      |      |       |       |       |        |       |       |       |      |       |       |       |      |       |       |       |       |       |       |       |       |      |       |      |       |       |       |      |      |      |      |      |       |      |       |      |      |       |       |      |      |      |       |      |       |      |      |       |          |    |  |  |  |    |    |    |    |    |  |    |  |                      |    |  |  |                   |     |                      |  |     |  |     |     |  |           |     |  |  |  |     |       |      |      |      |  |      |  |     |     |  |  |     |      |      |  |       |  |     |       |  |

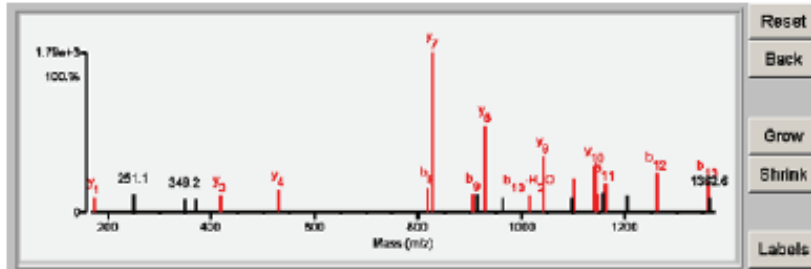

### C4

#### Detailed Results

| Rank                                                                                                                                                                                                                                                                                                                                                                                                                                                                                                                                                                                                                                                                                                                                                                                                                                                                                                                                                                                                                                                                                                                                                                                                                                                                                                                                                                                                                                                                                                                                                                                                                                                                                                                                                                                                                                                                                                                                                                                                                                                                                                                                                                                                                                                                                                                                                                                                                                                                            | Score  | SPI (%) | BCS     | # Unmatched Ions | Sequence                                                    | MH <sup>+</sup> Calculated (Da) | MH <sup>+</sup> Error (Da) | MH <sup>+</sup> Error (ppm) | Protein MW/pI (Da) | Species | Accession # | MS-Digest Index # | Protein Name                                                       |                    |         |         |         |         |         |                       |         |         |          |          |          |         |         |         |         |         |         |         |         |                       |         |         |          |          |          |                         |      |      |      |      |      |      |      |      |      |      |      |      |      |      |      |      |      |      |      |      |      |      |       |      |      |                       |       |      |      |       |       |       |       |       |       |       |       |       |       |       |       |       |       |       |       |       |       |       |        |       |       |       |       |      |      |       |      |       |      |       |       |      |      |      |       |      |       |       |      |       |      |       |       |      |      |      |      |          |  |    |   |  |    |  |    |  |  |    |    |    |  |    |  |  |    |  |    |  |  |    |     |     |     |           |  |       |      |  |     |  |      |  |  |     |       |      |  |      |  |  |       |  |      |  |  |      |      |      |      |
|---------------------------------------------------------------------------------------------------------------------------------------------------------------------------------------------------------------------------------------------------------------------------------------------------------------------------------------------------------------------------------------------------------------------------------------------------------------------------------------------------------------------------------------------------------------------------------------------------------------------------------------------------------------------------------------------------------------------------------------------------------------------------------------------------------------------------------------------------------------------------------------------------------------------------------------------------------------------------------------------------------------------------------------------------------------------------------------------------------------------------------------------------------------------------------------------------------------------------------------------------------------------------------------------------------------------------------------------------------------------------------------------------------------------------------------------------------------------------------------------------------------------------------------------------------------------------------------------------------------------------------------------------------------------------------------------------------------------------------------------------------------------------------------------------------------------------------------------------------------------------------------------------------------------------------------------------------------------------------------------------------------------------------------------------------------------------------------------------------------------------------------------------------------------------------------------------------------------------------------------------------------------------------------------------------------------------------------------------------------------------------------------------------------------------------------------------------------------------------|--------|---------|---------|------------------|-------------------------------------------------------------|---------------------------------|----------------------------|-----------------------------|--------------------|---------|-------------|-------------------|--------------------------------------------------------------------|--------------------|---------|---------|---------|---------|---------|-----------------------|---------|---------|----------|----------|----------|---------|---------|---------|---------|---------|---------|---------|---------|-----------------------|---------|---------|----------|----------|----------|-------------------------|------|------|------|------|------|------|------|------|------|------|------|------|------|------|------|------|------|------|------|------|------|------|-------|------|------|-----------------------|-------|------|------|-------|-------|-------|-------|-------|-------|-------|-------|-------|-------|-------|-------|-------|-------|-------|-------|-------|-------|-------|--------|-------|-------|-------|-------|------|------|-------|------|-------|------|-------|-------|------|------|------|-------|------|-------|-------|------|-------|------|-------|-------|------|------|------|------|----------|--|----|---|--|----|--|----|--|--|----|----|----|--|----|--|--|----|--|----|--|--|----|-----|-----|-----|-----------|--|-------|------|--|-----|--|------|--|--|-----|-------|------|--|------|--|--|-------|--|------|--|--|------|------|------|------|
| 1                                                                                                                                                                                                                                                                                                                                                                                                                                                                                                                                                                                                                                                                                                                                                                                                                                                                                                                                                                                                                                                                                                                                                                                                                                                                                                                                                                                                                                                                                                                                                                                                                                                                                                                                                                                                                                                                                                                                                                                                                                                                                                                                                                                                                                                                                                                                                                                                                                                                               | 12.89  | 81.2    | 9       | 11/26            | (S) I L K E / A / I / T / Y / D / G / A L / L / G / D R (S) | 1867.8874                       | -0.0114                    | -6.2                        | 27385.2/6.87       | HUMAN   | Q16068      | 288971            | Eukaryotic translation initiation factor 4H - Homo sapiens (Human) |                    |         |         |         |         |         |                       |         |         |          |          |          |         |         |         |         |         |         |         |         |                       |         |         |          |          |          |                         |      |      |      |      |      |      |      |      |      |      |      |      |      |      |      |      |      |      |      |      |      |      |       |      |      |                       |       |      |      |       |       |       |       |       |       |       |       |       |       |       |       |       |       |       |       |       |       |       |        |       |       |       |       |      |      |       |      |       |      |       |       |      |      |      |       |      |       |       |      |       |      |       |       |      |      |      |      |          |  |    |   |  |    |  |    |  |  |    |    |    |  |    |  |  |    |  |    |  |  |    |     |     |     |           |  |       |      |  |     |  |      |  |  |     |       |      |  |      |  |  |       |  |      |  |  |      |      |      |      |
| <table border="1"> <thead> <tr> <th>Fragment-Ion (m/z)</th> <th>72.080</th> <th>88.086</th> <th>108.076</th> <th>300.100</th> <th>347.188</th> <th>372.140</th> <th>480.260</th> <th>601.178</th> <th>672.228</th> <th>684.244</th> <th>844.367</th> <th>866.276</th> <th>886.314</th> <th>701.388</th> <th>748.322</th> <th>788.334</th> <th>778.361</th> <th>788.364</th> <th>816.418</th> <th>881.387<sup>+2</sup></th> <th>873.902</th> <th>879.488</th> <th>1080.524</th> <th>1193.809</th> <th>1284.848</th> </tr> </thead> <tbody> <tr> <td>Frac. Inten. (% of TIC)</td> <td>1.84</td> <td>0.12</td> <td>0.05</td> <td>2.22</td> <td>5.98</td> <td>4.01</td> <td>2.68</td> <td>6.25</td> <td>9.76</td> <td>1.72</td> <td>1.51</td> <td>6.53</td> <td>3.45</td> <td>3.60</td> <td>1.66</td> <td>2.55</td> <td>3.36</td> <td>2.43</td> <td>5.44</td> <td>2.24</td> <td>2.37</td> <td>8.95</td> <td>10.99</td> <td>5.96</td> <td>3.27</td> </tr> <tr> <td>Rel. Inten. (% of BP)</td> <td>16.74</td> <td>1.06</td> <td>0.48</td> <td>20.22</td> <td>63.49</td> <td>36.50</td> <td>24.40</td> <td>56.83</td> <td>88.82</td> <td>15.68</td> <td>13.78</td> <td>60.31</td> <td>31.41</td> <td>32.74</td> <td>15.14</td> <td>23.60</td> <td>30.61</td> <td>22.08</td> <td>49.52</td> <td>20.41</td> <td>21.52</td> <td>81.45</td> <td>100.00</td> <td>53.32</td> <td>29.73</td> </tr> <tr> <td>Score</td> <td>-0.17</td> <td>0.22</td> <td>1.00</td> <td>-0.20</td> <td>1.50</td> <td>-0.37</td> <td>1.50</td> <td>-0.57</td> <td>-0.89</td> <td>0.50</td> <td>1.50</td> <td>0.50</td> <td>-0.31</td> <td>1.50</td> <td>-0.15</td> <td>-0.24</td> <td>0.50</td> <td>-0.22</td> <td>1.50</td> <td>-0.20</td> <td>-0.22</td> <td>1.50</td> <td>1.50</td> <td>1.50</td> <td>1.50</td> </tr> <tr> <td>Ion-type</td> <td></td> <td>L1</td> <td>Y</td> <td></td> <td>y3</td> <td></td> <td>y4</td> <td></td> <td></td> <td>b3</td> <td>y6</td> <td>b4</td> <td></td> <td>y7</td> <td></td> <td></td> <td>b5</td> <td></td> <td>y8</td> <td></td> <td></td> <td>y9</td> <td>y10</td> <td>y11</td> <td>y12</td> </tr> <tr> <td>Delta ppm</td> <td></td> <td>-14.2</td> <td>-6.7</td> <td></td> <td>1.8</td> <td></td> <td>-3.3</td> <td></td> <td></td> <td>2.3</td> <td>-24.2</td> <td>-6.9</td> <td></td> <td>-9.2</td> <td></td> <td></td> <td>-16.1</td> <td></td> <td>-3.3</td> <td></td> <td></td> <td>-1.0</td> <td>-7.9</td> <td>-6.3</td> <td>-4.2</td> </tr> </tbody> </table> |        |         |         |                  |                                                             |                                 |                            |                             |                    |         |             |                   |                                                                    | Fragment-Ion (m/z) | 72.080  | 88.086  | 108.076 | 300.100 | 347.188 | 372.140               | 480.260 | 601.178 | 672.228  | 684.244  | 844.367  | 866.276 | 886.314 | 701.388 | 748.322 | 788.334 | 778.361 | 788.364 | 816.418 | 881.387 <sup>+2</sup> | 873.902 | 879.488 | 1080.524 | 1193.809 | 1284.848 | Frac. Inten. (% of TIC) | 1.84 | 0.12 | 0.05 | 2.22 | 5.98 | 4.01 | 2.68 | 6.25 | 9.76 | 1.72 | 1.51 | 6.53 | 3.45 | 3.60 | 1.66 | 2.55 | 3.36 | 2.43 | 5.44 | 2.24 | 2.37 | 8.95 | 10.99 | 5.96 | 3.27 | Rel. Inten. (% of BP) | 16.74 | 1.06 | 0.48 | 20.22 | 63.49 | 36.50 | 24.40 | 56.83 | 88.82 | 15.68 | 13.78 | 60.31 | 31.41 | 32.74 | 15.14 | 23.60 | 30.61 | 22.08 | 49.52 | 20.41 | 21.52 | 81.45 | 100.00 | 53.32 | 29.73 | Score | -0.17 | 0.22 | 1.00 | -0.20 | 1.50 | -0.37 | 1.50 | -0.57 | -0.89 | 0.50 | 1.50 | 0.50 | -0.31 | 1.50 | -0.15 | -0.24 | 0.50 | -0.22 | 1.50 | -0.20 | -0.22 | 1.50 | 1.50 | 1.50 | 1.50 | Ion-type |  | L1 | Y |  | y3 |  | y4 |  |  | b3 | y6 | b4 |  | y7 |  |  | b5 |  | y8 |  |  | y9 | y10 | y11 | y12 | Delta ppm |  | -14.2 | -6.7 |  | 1.8 |  | -3.3 |  |  | 2.3 | -24.2 | -6.9 |  | -9.2 |  |  | -16.1 |  | -3.3 |  |  | -1.0 | -7.9 | -6.3 | -4.2 |
| Fragment-Ion (m/z)                                                                                                                                                                                                                                                                                                                                                                                                                                                                                                                                                                                                                                                                                                                                                                                                                                                                                                                                                                                                                                                                                                                                                                                                                                                                                                                                                                                                                                                                                                                                                                                                                                                                                                                                                                                                                                                                                                                                                                                                                                                                                                                                                                                                                                                                                                                                                                                                                                                              | 72.080 | 88.086  | 108.076 | 300.100          | 347.188                                                     | 372.140                         | 480.260                    | 601.178                     | 672.228            | 684.244 | 844.367     | 866.276           | 886.314                                                            | 701.388            | 748.322 | 788.334 | 778.361 | 788.364 | 816.418 | 881.387 <sup>+2</sup> | 873.902 | 879.488 | 1080.524 | 1193.809 | 1284.848 |         |         |         |         |         |         |         |         |                       |         |         |          |          |          |                         |      |      |      |      |      |      |      |      |      |      |      |      |      |      |      |      |      |      |      |      |      |      |       |      |      |                       |       |      |      |       |       |       |       |       |       |       |       |       |       |       |       |       |       |       |       |       |       |       |        |       |       |       |       |      |      |       |      |       |      |       |       |      |      |      |       |      |       |       |      |       |      |       |       |      |      |      |      |          |  |    |   |  |    |  |    |  |  |    |    |    |  |    |  |  |    |  |    |  |  |    |     |     |     |           |  |       |      |  |     |  |      |  |  |     |       |      |  |      |  |  |       |  |      |  |  |      |      |      |      |
| Frac. Inten. (% of TIC)                                                                                                                                                                                                                                                                                                                                                                                                                                                                                                                                                                                                                                                                                                                                                                                                                                                                                                                                                                                                                                                                                                                                                                                                                                                                                                                                                                                                                                                                                                                                                                                                                                                                                                                                                                                                                                                                                                                                                                                                                                                                                                                                                                                                                                                                                                                                                                                                                                                         | 1.84   | 0.12    | 0.05    | 2.22             | 5.98                                                        | 4.01                            | 2.68                       | 6.25                        | 9.76               | 1.72    | 1.51        | 6.53              | 3.45                                                               | 3.60               | 1.66    | 2.55    | 3.36    | 2.43    | 5.44    | 2.24                  | 2.37    | 8.95    | 10.99    | 5.96     | 3.27     |         |         |         |         |         |         |         |         |                       |         |         |          |          |          |                         |      |      |      |      |      |      |      |      |      |      |      |      |      |      |      |      |      |      |      |      |      |      |       |      |      |                       |       |      |      |       |       |       |       |       |       |       |       |       |       |       |       |       |       |       |       |       |       |       |        |       |       |       |       |      |      |       |      |       |      |       |       |      |      |      |       |      |       |       |      |       |      |       |       |      |      |      |      |          |  |    |   |  |    |  |    |  |  |    |    |    |  |    |  |  |    |  |    |  |  |    |     |     |     |           |  |       |      |  |     |  |      |  |  |     |       |      |  |      |  |  |       |  |      |  |  |      |      |      |      |
| Rel. Inten. (% of BP)                                                                                                                                                                                                                                                                                                                                                                                                                                                                                                                                                                                                                                                                                                                                                                                                                                                                                                                                                                                                                                                                                                                                                                                                                                                                                                                                                                                                                                                                                                                                                                                                                                                                                                                                                                                                                                                                                                                                                                                                                                                                                                                                                                                                                                                                                                                                                                                                                                                           | 16.74  | 1.06    | 0.48    | 20.22            | 63.49                                                       | 36.50                           | 24.40                      | 56.83                       | 88.82              | 15.68   | 13.78       | 60.31             | 31.41                                                              | 32.74              | 15.14   | 23.60   | 30.61   | 22.08   | 49.52   | 20.41                 | 21.52   | 81.45   | 100.00   | 53.32    | 29.73    |         |         |         |         |         |         |         |         |                       |         |         |          |          |          |                         |      |      |      |      |      |      |      |      |      |      |      |      |      |      |      |      |      |      |      |      |      |      |       |      |      |                       |       |      |      |       |       |       |       |       |       |       |       |       |       |       |       |       |       |       |       |       |       |       |        |       |       |       |       |      |      |       |      |       |      |       |       |      |      |      |       |      |       |       |      |       |      |       |       |      |      |      |      |          |  |    |   |  |    |  |    |  |  |    |    |    |  |    |  |  |    |  |    |  |  |    |     |     |     |           |  |       |      |  |     |  |      |  |  |     |       |      |  |      |  |  |       |  |      |  |  |      |      |      |      |
| Score                                                                                                                                                                                                                                                                                                                                                                                                                                                                                                                                                                                                                                                                                                                                                                                                                                                                                                                                                                                                                                                                                                                                                                                                                                                                                                                                                                                                                                                                                                                                                                                                                                                                                                                                                                                                                                                                                                                                                                                                                                                                                                                                                                                                                                                                                                                                                                                                                                                                           | -0.17  | 0.22    | 1.00    | -0.20            | 1.50                                                        | -0.37                           | 1.50                       | -0.57                       | -0.89              | 0.50    | 1.50        | 0.50              | -0.31                                                              | 1.50               | -0.15   | -0.24   | 0.50    | -0.22   | 1.50    | -0.20                 | -0.22   | 1.50    | 1.50     | 1.50     | 1.50     |         |         |         |         |         |         |         |         |                       |         |         |          |          |          |                         |      |      |      |      |      |      |      |      |      |      |      |      |      |      |      |      |      |      |      |      |      |      |       |      |      |                       |       |      |      |       |       |       |       |       |       |       |       |       |       |       |       |       |       |       |       |       |       |       |        |       |       |       |       |      |      |       |      |       |      |       |       |      |      |      |       |      |       |       |      |       |      |       |       |      |      |      |      |          |  |    |   |  |    |  |    |  |  |    |    |    |  |    |  |  |    |  |    |  |  |    |     |     |     |           |  |       |      |  |     |  |      |  |  |     |       |      |  |      |  |  |       |  |      |  |  |      |      |      |      |
| Ion-type                                                                                                                                                                                                                                                                                                                                                                                                                                                                                                                                                                                                                                                                                                                                                                                                                                                                                                                                                                                                                                                                                                                                                                                                                                                                                                                                                                                                                                                                                                                                                                                                                                                                                                                                                                                                                                                                                                                                                                                                                                                                                                                                                                                                                                                                                                                                                                                                                                                                        |        | L1      | Y       |                  | y3                                                          |                                 | y4                         |                             |                    | b3      | y6          | b4                |                                                                    | y7                 |         |         | b5      |         | y8      |                       |         | y9      | y10      | y11      | y12      |         |         |         |         |         |         |         |         |                       |         |         |          |          |          |                         |      |      |      |      |      |      |      |      |      |      |      |      |      |      |      |      |      |      |      |      |      |      |       |      |      |                       |       |      |      |       |       |       |       |       |       |       |       |       |       |       |       |       |       |       |       |       |       |       |        |       |       |       |       |      |      |       |      |       |      |       |       |      |      |      |       |      |       |       |      |       |      |       |       |      |      |      |      |          |  |    |   |  |    |  |    |  |  |    |    |    |  |    |  |  |    |  |    |  |  |    |     |     |     |           |  |       |      |  |     |  |      |  |  |     |       |      |  |      |  |  |       |  |      |  |  |      |      |      |      |
| Delta ppm                                                                                                                                                                                                                                                                                                                                                                                                                                                                                                                                                                                                                                                                                                                                                                                                                                                                                                                                                                                                                                                                                                                                                                                                                                                                                                                                                                                                                                                                                                                                                                                                                                                                                                                                                                                                                                                                                                                                                                                                                                                                                                                                                                                                                                                                                                                                                                                                                                                                       |        | -14.2   | -6.7    |                  | 1.8                                                         |                                 | -3.3                       |                             |                    | 2.3     | -24.2       | -6.9              |                                                                    | -9.2               |         |         | -16.1   |         | -3.3    |                       |         | -1.0    | -7.9     | -6.3     | -4.2     |         |         |         |         |         |         |         |         |                       |         |         |          |          |          |                         |      |      |      |      |      |      |      |      |      |      |      |      |      |      |      |      |      |      |      |      |      |      |       |      |      |                       |       |      |      |       |       |       |       |       |       |       |       |       |       |       |       |       |       |       |       |       |       |       |        |       |       |       |       |      |      |       |      |       |      |       |       |      |      |      |       |      |       |       |      |       |      |       |       |      |      |      |      |          |  |    |   |  |    |  |    |  |  |    |    |    |  |    |  |  |    |  |    |  |  |    |     |     |     |           |  |       |      |  |     |  |      |  |  |     |       |      |  |      |  |  |       |  |      |  |  |      |      |      |      |

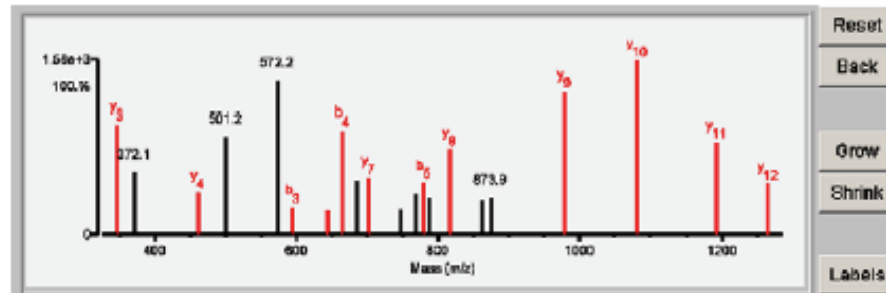

# C5

## Detailed Results

| Rank | Score | SP1 (%) | BCS | # Unmatched Ions | Sequence                | MH <sup>+</sup> Calculated (Da) | MH <sup>+</sup> Error (Da) | MH <sup>+</sup> Error (ppm) | Protein MW (Da) | Species | Accession # | MS-Digest Index # | Protein Name                                                          |
|------|-------|---------|-----|------------------|-------------------------|---------------------------------|----------------------------|-----------------------------|-----------------|---------|-------------|-------------------|-----------------------------------------------------------------------|
| 1    | 12.78 | 71.1    | 5   | 12/25            | (L) S/P/P/P Q/A A/R (R) | 811.4404                        | -0.0030                    | -3.3                        | 23410.1/8.24    | HUMAN   | P83118      | 197383            | HERV-H_3q26 provirus ancestral Gag polyprotein - Homo sapiens (Human) |

  

| Fragment-Ion (m/z)      | 70.086 | 88.087 | 112.088 | 128.057 | 173.132 | 175.122 | 183.084 | 228.118 | 283.152 | 311.888 <sup>+2</sup>            | 317.191 | 320.198 <sup>+2</sup> | 323.188 | 364.189 <sup>+2</sup> | 367.221 <sup>+2</sup> | 368.711 <sup>+2</sup> | 368.861 <sup>+2</sup> | 389.711 <sup>+2</sup> | 374.484 | 414.244 | 423.192 | 626.273            | 542.308 | 638.357 | 738.411 |
|-------------------------|--------|--------|---------|---------|---------|---------|---------|---------|---------|----------------------------------|---------|-----------------------|---------|-----------------------|-----------------------|-----------------------|-----------------------|-----------------------|---------|---------|---------|--------------------|---------|---------|---------|
| Frac. Inten. (% of TIC) | 0.01   | 2.68   | 0.04    | 3.10    | 1.92    | 2.03    | 1.22    | 3.04    | 1.78    | 1.59                             | 1.78    | 5.62                  | 1.53    | 1.19                  | 1.35                  | 38.44                 | 1.65                  | 3.03                  | 1.21    | 7.95    | 1.85    | 1.87               | 3.46    | 9.68    | 1.99    |
| Rel. Inten. (% of BP)   | 0.03   | 5.96   | 0.10    | 8.06    | 4.99    | 5.29    | 3.18    | 7.90    | 4.63    | 4.14                             | 4.62    | 14.63                 | 3.97    | 3.09                  | 3.51                  | 100.00                | 4.29                  | 7.88                  | 3.15    | 20.67   | 4.82    | 4.85               | 8.99    | 25.17   | 5.17    |
| Score                   | 0.20   | -0.07  | 0.33    | -0.06   | -0.05   | 1.50    | -0.03   | 0.75    | -0.05   | 0.50                             | 1.50    | 1.50                  | 0.75    | -0.03                 | -0.04                 | 1.50                  | -0.04                 | -0.08                 | -0.03   | -0.21   | -0.05   | 0.50               | 1.50    | 1.50    | 1.50    |
| Ion-type                | PR     |        | R       |         |         | Y1      |         | PQ      |         | 36-NH <sub>2</sub> <sup>+2</sup> | Y5      | Y6 <sup>+2</sup>      | PPQ     |                       | Y7 <sup>+2</sup>      |                       |                       |                       |         |         |         | Y5-NH <sub>2</sub> | Y5      | Y6      | Y7      |
| Delta ppm               | 11.1   |        | 11.4    |         |         | 15.7    |         | -5.8    |         | -3.5                             | -7.2    | 11.3                  | -15.1   |                       | 5.5                   |                       |                       |                       |         |         |         | -8.7               | 5.8     | -0.5    | 1.8     |

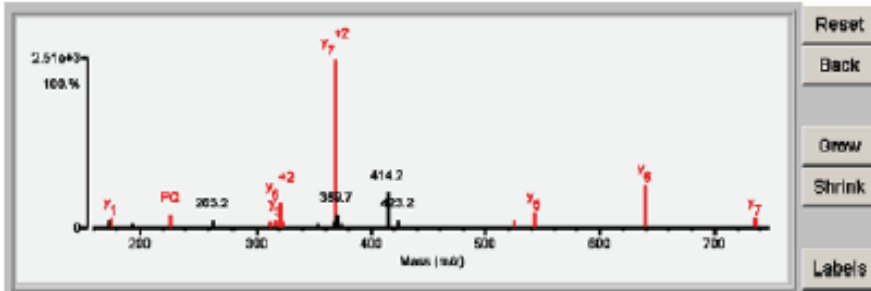

# C6

## Detailed Results

| Rank | Score | SP1 (%) | BCS | # Unmatched Ions | Sequence                                                        | MH <sup>+</sup> Calculated (Da) | MH <sup>+</sup> Error (Da) | MH <sup>+</sup> Error (ppm) | Protein MW (Da) | Species | Accession # | MS-Digest Index # | Protein Name                                           |
|------|-------|---------|-----|------------------|-----------------------------------------------------------------|---------------------------------|----------------------------|-----------------------------|-----------------|---------|-------------|-------------------|--------------------------------------------------------|
| 1    | 18.72 | 85.7    | 11  | 2/25             | (Q) A S A/S/T/R/P W A/A/A/T/P P R W/P P I I/Q Q D I Q/P Q R (K) | 3205.5623                       | -0.0170                    | -5.3                        | 119409.3/5.40   | HUMAN   | P48379      | 52251             | Large proline-rich protein BATS - Homo sapiens (Human) |

  

| Fragment-Ion (m/z)      | 300.100 | 318.110 | 390.206 | 426.208 | 447.151 | 487.249 | 530.189 | 548.198 | 596.318 | 609.299 | 609.290 | 663.358 <sup>+2</sup> | 677.238 | 668.005 <sup>+2</sup> | 1002.487 | 1017.037 <sup>+2</sup> | 1051.408 | 1052.541 <sup>+2</sup> | 1102.443 | 1173.478 | 1204.608 | 1265.150 <sup>+2</sup> | 1272.546 | 1325.707 | 1934.004 |
|-------------------------|---------|---------|---------|---------|---------|---------|---------|---------|---------|---------|---------|-----------------------|---------|-----------------------|----------|------------------------|----------|------------------------|----------|----------|----------|------------------------|----------|----------|----------|
| Frac. Inten. (% of TIC) | 1.38    | 1.51    | 1.24    | 1.25    | 2.96    | 2.83    | 4.37    | 1.58    | 4.88    | 3.00    | 8.19    | 5.43                  | 1.67    | 33.22                 | 1.00     | 2.95                   | 1.73     | 1.83                   | 1.40     | 1.84     | 1.05     | 9.28                   | 1.25     | 4.16     | 2.23     |
| Rel. Inten. (% of BP)   | 4.15    | 4.54    | 3.74    | 3.78    | 8.92    | 8.51    | 13.15   | 4.89    | 14.70   | 9.09    | 18.84   | 16.34                 | 5.02    | 100.00                | 3.02     | 8.87                   | 5.20     | 4.92                   | 4.23     | 5.55     | 3.15     | 27.89                  | 3.78     | 12.53    | 6.71     |
| Score                   | 0.25    | 0.50    | 1.50    | 0.75    | 0.50    | 0.75    | 0.25    | 0.50    | 0.75    | 0.75    | 0.25    | 1.50                  | 0.50    | -1.00                 | 1.50     | 1.50                   | 0.50     | 1.50                   | 0.50     | 0.50     | -0.05    | 1.50                   | 0.50     | 1.50     | 1.50     |
| Ion-type                | b3-HCO  | b3      | y3      | PWAA    | b4      | PWAAA   | b5-HCO  | b5      | WAAAAP  | PEWVP   | b5-HCO  | y11 <sup>+2</sup>     | b6      |                       | y5       | y17 <sup>+2</sup>      | b9       | y18 <sup>+2</sup>      | b10      | b11      |          | y22 <sup>+2</sup>      | b12      | y11      | y18      |
| Delta ppm               | -7.8    | -8.8    | -3.2    | -16.6   | -10.3   | -5.2    | -7.0    | -9.3    | -3.9    | -8.9    | -7.8    | -8.7                  | -11.5   |                       | -9.7     | -7.2                   | -8.8     | -20.8                  | -8.1     | -9.7     |          | -13.1                  | -9.4     | -7.5     | -4.9     |

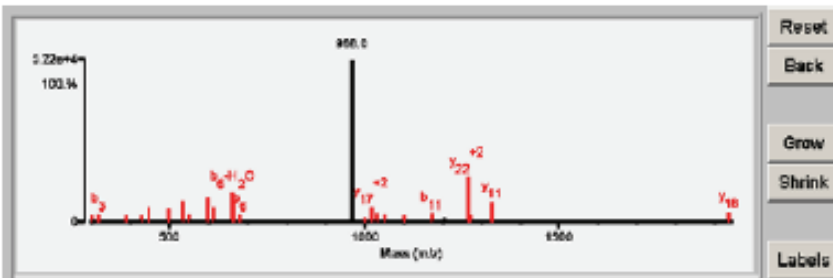

C7

Detailed Results

| Rank | Score | SP1 (%) | BCS | # Unmatched Ions | Sequence                | MH <sup>+</sup> Calculated (Da) | MH <sup>+</sup> Error (Da) | MH <sup>+</sup> Error (ppm) | Protein MW (Da) | Species | Accession # | MS-Digest Index # | Protein Name                     |
|------|-------|---------|-----|------------------|-------------------------|---------------------------------|----------------------------|-----------------------------|-----------------|---------|-------------|-------------------|----------------------------------|
| 1    | 14.28 | 79.4    | 7   | 8/26             | (T) T/A/A/Q/Q/E/L/R (T) | 1004.4830                       | -0.0000                    | -0.0                        | 22840.2/5.44    | HUMAN   | P36680      | 369021            | Myosin-10 - Homo sapiens (Human) |
| 1    | 14.28 | 79.4    | 7   | 8/26             | (S) T/A/A/Q/Q/E/L/R (S) | 1004.4830                       | -0.0000                    | -0.0                        | 226538.4/5.60   | HUMAN   | P36678      | 369138            | Myosin-9 - Homo sapiens (Human)  |

  

| Fragment-Ion (m/z)      | 70.084 | 72.082 | 74.081 | 110.069 | 116.086 | 143.084 | 175.120 | 183.078 | 200.100 | 207.078 | 243.080 | 281.092 | 288.201 | 332.128 <sup>+2</sup> | 337.198 <sup>+2</sup> | 417.262 | 452.167 | 506.248 | 628.270 | 645.302 | 658.348 | 673.382 | 698.266 | 744.391 | 816.428 |
|-------------------------|--------|--------|--------|---------|---------|---------|---------|---------|---------|---------|---------|---------|---------|-----------------------|-----------------------|---------|---------|---------|---------|---------|---------|---------|---------|---------|---------|
| Frac. Inten. (% of TIC) | 0.00   | 3.38   | 2.31   | 2.25    | 2.11    | 4.27    | 4.38    | 2.34    | 2.03    | 2.59    | 10.17   | 6.27    | 3.40    | 3.10                  | 2.19                  | 4.54    | 2.17    | 2.47    | 2.91    | 10.70   | 3.46    | 9.53    | 2.07    | 7.37    | 3.99    |
| Rel. Inten. (% of BP)   | 0.02   | 31.57  | 21.54  | 20.98   | 19.68   | 39.90   | 41.06   | 21.85   | 19.01   | 24.20   | 95.07   | 58.60   | 31.76   | 28.99                 | 20.43                 | 42.45   | 20.23   | 23.11   | 27.16   | 100.00  | 32.32   | 89.02   | 19.36   | 68.82   | 37.24   |
| Score                   | 0.20   | -0.32  | -0.22  | -0.21   | 0.50    | 0.75    | 1.50    | -0.22   | 0.75    | -0.34   | 0.25    | 0.50    | 1.50    | -0.29                 | 1.50                  | 1.50    | -0.20   | -0.23   | 0.50    | 1.50    | 0.50    | 1.50    | 0.25    | 1.50    | 1.50    |
| Ion-type                | PR     |        |        |         | AA-28   | AA      | Y1      |         | AQ      |         | b2-H2O  | b2      | Y2      |                       | Y5 <sup>-2</sup>      | Y3      |         |         | Y4-NH3  | Y4      | Y5-NH3  | Y5      | b5-H2O  | Y5      | Y7      |
| Delta ppm               | -16.1  |        |        |         | -24.2   | 10.5    | 4.8     |         | -7.3    |         | -2.8    | 1.7     | -7.7    |                       | 29.6                  | 14.6    |         |         | -14.3   | -3.5    | 18.7    | -0.4    | -33.2   | -11.7   | -13.8   |

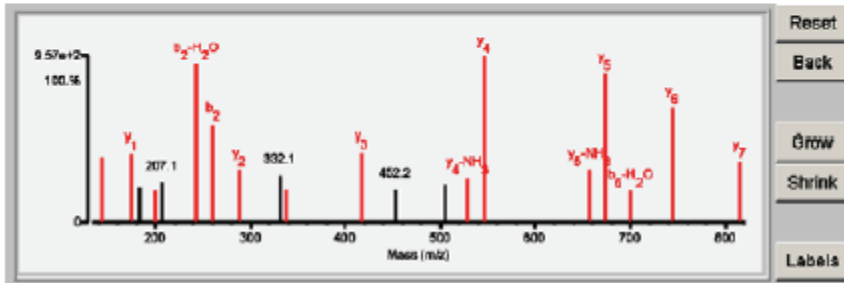

C8

Detailed Results

| Rank | Score | SP1 (%) | BCS | # Unmatched Ions | Sequence                                                | MH <sup>+</sup> Calculated (Da) | MH <sup>+</sup> Error (Da) | MH <sup>+</sup> Error (ppm) | Protein MW (Da) | Species | Accession # | MS-Digest Index # | Protein Name                                                |
|------|-------|---------|-----|------------------|---------------------------------------------------------|---------------------------------|----------------------------|-----------------------------|-----------------|---------|-------------|-------------------|-------------------------------------------------------------|
| 1    | 23.97 | 94.8    | 11  | 3/25             | (G) L V I R (T) P / Z / G / T / L / K / R / L / P R (V) | 1862.8407                       | 0.0014                     | 0.8                         | 46374.44/36     | HUMAN   | P55209      | 375991            | Nucleosome assembly protein 1-like 1 - Homo sapiens (Human) |

  

| Fragment-Ion (m/z)      | 72.081 | 86.097 | 213.084 | 229.117 | 272.171 | 301.158 | 330.164 | 385.253 | 430.199 | 442.170 | 472.287 | 531.347 | 541.232 | 588.304 <sup>+2</sup> | 601.328 | 617.326 <sup>+2</sup> | 628.277 | 672.838 <sup>+2</sup> | 714.416 | 722.879 <sup>+2</sup> | 877.489 | 934.501 | 1132.597 | 1233.842 | 1362.886 |
|-------------------------|--------|--------|---------|---------|---------|---------|---------|---------|---------|---------|---------|---------|---------|-----------------------|---------|-----------------------|---------|-----------------------|---------|-----------------------|---------|---------|----------|----------|----------|
| Frac. Inten. (% of TIC) | 0.26   | 0.05   | 1.39    | 4.13    | 5.99    | 7.85    | 3.13    | 1.67    | 10.58   | 2.58    | 1.84    | 8.98    | 1.25    | 8.57                  | 1.06    | 7.52                  | 1.72    | 1.18                  | 2.05    | 1.88                  | 1.39    | 1.45    | 20.18    | 3.90     | 1.41     |
| Rel. Inten. (% of BP)   | 1.27   | 0.24   | 6.81    | 20.45   | 28.04   | 38.90   | 15.52   | 8.27    | 52.45   | 12.78   | 8.11    | 34.33   | 8.19    | 42.45                 | 9.70    | 37.30                 | 8.53    | 5.77                  | 10.14   | 8.32                  | 6.88    | 7.10    | 100.00   | 19.21    | 6.97     |
| Score                   | 0.50   | 0.22   | -0.07   | 0.75    | 1.50    | 1.50    | 0.75    | 1.50    | 0.50    | -0.15   | 1.50    | 0.50    | -0.06   | 1.50                  | 1.50    | 0.50                  | 0.50    | 1.50                  | 0.50    | 1.50                  | 1.50    | 1.50    | 1.50     | 1.50     | 1.50     |
| Ion-type                | V      | LI     | VE      | Y2      | b2      | ESL     | Y3      | b3      | Y4      | b4      | Y5      | b5      | Y6      | y10 <sup>+2</sup>     | Y7      | y11 <sup>+2</sup>     | b6      | y12-H2O <sup>+2</sup> | Y8      | y13-NH3 <sup>+2</sup> | Y7      | Y8      | Y10      | Y11      | Y12      |
| Delta ppm               | 7.3    | 2.0    |         | -12.1   | -3.4    | -3.1    | -8.4    | -7.2    | -5.6    |         | -0.9    | -3.8    |         | 0.2                   | -4.3    | -2.9                  | -30.4   | -8.1                  | 2.4     | 13.3                  | -0.7    | 1.8     | -2.8     | -4.4     | -2.8     |

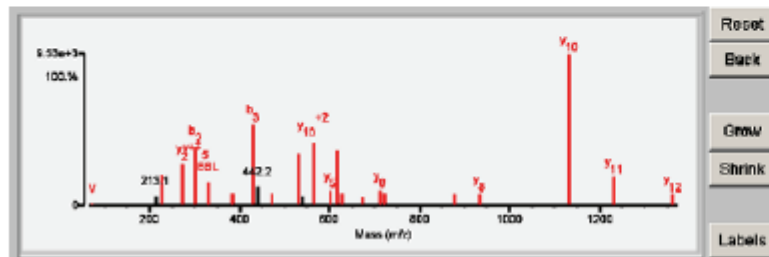

# C9

## Detailed Results

| Rank                                                                                                                                                                                                                                                                                                                                                                                                                                                                                                                                                                                                                                                                                                                                                                                                                                                                                                                                                                                                                                                                                                                                                                                                                                                                                                                                                                                                                                                                                                                                                                                                                                                                                                                                                                                                                                                                                                                                                                                                                                                                                                                                                                                                                                                                                                                                                                                                                                                                                                                                                                                                                                                                                             | Score  | SP1 (%) | BC8    | # Unmatched Ions | Sequence                          | MH <sup>+</sup> Calculated (Da) | MH <sup>+</sup> Error (Da) | MH <sup>+</sup> Error (ppm) | Protein MW (Da) | Species        | Accession #    | M3-Digest Index # | Protein Name                     |                    |                |                |                |                              |                |                |                |                                 |                 |                 |          |         |         |         |         |         |         |                       |         |         |         |         |          |          |          |                         |      |      |      |      |      |      |      |      |      |      |       |      |      |      |      |      |      |      |      |      |      |      |      |       |      |                       |      |      |      |       |      |       |      |      |       |      |        |       |      |      |       |      |       |       |       |       |      |       |      |       |       |       |      |      |      |       |      |      |       |      |       |      |      |      |       |      |      |      |      |      |      |      |       |      |      |      |      |          |    |   |    |  |                |                |  |    |  |                |                |    |  |                |                |                |                |                              |                |                |                |                                 |                 |                 |           |      |       |      |  |       |       |  |       |  |       |      |       |  |       |      |     |      |       |     |      |  |      |       |      |       |
|--------------------------------------------------------------------------------------------------------------------------------------------------------------------------------------------------------------------------------------------------------------------------------------------------------------------------------------------------------------------------------------------------------------------------------------------------------------------------------------------------------------------------------------------------------------------------------------------------------------------------------------------------------------------------------------------------------------------------------------------------------------------------------------------------------------------------------------------------------------------------------------------------------------------------------------------------------------------------------------------------------------------------------------------------------------------------------------------------------------------------------------------------------------------------------------------------------------------------------------------------------------------------------------------------------------------------------------------------------------------------------------------------------------------------------------------------------------------------------------------------------------------------------------------------------------------------------------------------------------------------------------------------------------------------------------------------------------------------------------------------------------------------------------------------------------------------------------------------------------------------------------------------------------------------------------------------------------------------------------------------------------------------------------------------------------------------------------------------------------------------------------------------------------------------------------------------------------------------------------------------------------------------------------------------------------------------------------------------------------------------------------------------------------------------------------------------------------------------------------------------------------------------------------------------------------------------------------------------------------------------------------------------------------------------------------------------|--------|---------|--------|------------------|-----------------------------------|---------------------------------|----------------------------|-----------------------------|-----------------|----------------|----------------|-------------------|----------------------------------|--------------------|----------------|----------------|----------------|------------------------------|----------------|----------------|----------------|---------------------------------|-----------------|-----------------|----------|---------|---------|---------|---------|---------|---------|-----------------------|---------|---------|---------|---------|----------|----------|----------|-------------------------|------|------|------|------|------|------|------|------|------|------|-------|------|------|------|------|------|------|------|------|------|------|------|------|-------|------|-----------------------|------|------|------|-------|------|-------|------|------|-------|------|--------|-------|------|------|-------|------|-------|-------|-------|-------|------|-------|------|-------|-------|-------|------|------|------|-------|------|------|-------|------|-------|------|------|------|-------|------|------|------|------|------|------|------|-------|------|------|------|------|----------|----|---|----|--|----------------|----------------|--|----|--|----------------|----------------|----|--|----------------|----------------|----------------|----------------|------------------------------|----------------|----------------|----------------|---------------------------------|-----------------|-----------------|-----------|------|-------|------|--|-------|-------|--|-------|--|-------|------|-------|--|-------|------|-----|------|-------|-----|------|--|------|-------|------|-------|
| 1                                                                                                                                                                                                                                                                                                                                                                                                                                                                                                                                                                                                                                                                                                                                                                                                                                                                                                                                                                                                                                                                                                                                                                                                                                                                                                                                                                                                                                                                                                                                                                                                                                                                                                                                                                                                                                                                                                                                                                                                                                                                                                                                                                                                                                                                                                                                                                                                                                                                                                                                                                                                                                                                                                | 18.34  | 88.1    | 9      | 5/25             | (D) I I V I R I W V V R R L R (E) | 1444.7817                       | -0.0072                    | -5.0                        | 70288.716.20    | HUMAN          | P13788 421947  |                   | Plastin-2 - Homo sapiens (Human) |                    |                |                |                |                              |                |                |                |                                 |                 |                 |          |         |         |         |         |         |         |                       |         |         |         |         |          |          |          |                         |      |      |      |      |      |      |      |      |      |      |       |      |      |      |      |      |      |      |      |      |      |      |      |       |      |                       |      |      |      |       |      |       |      |      |       |      |        |       |      |      |       |      |       |       |       |       |      |       |      |       |       |       |      |      |      |       |      |      |       |      |       |      |      |      |       |      |      |      |      |      |      |      |       |      |      |      |      |          |    |   |    |  |                |                |  |    |  |                |                |    |  |                |                |                |                |                              |                |                |                |                                 |                 |                 |           |      |       |      |  |       |       |  |       |  |       |      |       |  |       |      |     |      |       |     |      |  |      |       |      |       |
| <table border="1"> <thead> <tr> <th>Fragment-Ion (m/z)</th> <th>70.086</th> <th>72.078</th> <th>88.098</th> <th>120.080</th> <th>174.090</th> <th>175.114</th> <th>185.184</th> <th>214.117</th> <th>279.134</th> <th>288.186</th> <th>315.172</th> <th>327.189</th> <th>355.194</th> <th>389.246</th> <th>414.238</th> <th>618.284</th> <th>628.284</th> <th>666.794<sup>+2</sup></th> <th>832.337</th> <th>731.401</th> <th>784.412</th> <th>817.478</th> <th>1014.488</th> <th>1081.628</th> <th>1130.583</th> </tr> </thead> <tbody> <tr> <td>Frag. Inten. (% of TIC)</td> <td>0.00</td> <td>0.08</td> <td>0.51</td> <td>1.87</td> <td>1.74</td> <td>2.08</td> <td>1.82</td> <td>1.57</td> <td>4.27</td> <td>1.43</td> <td>18.55</td> <td>2.46</td> <td>1.51</td> <td>1.50</td> <td>6.51</td> <td>1.75</td> <td>3.21</td> <td>2.10</td> <td>5.98</td> <td>9.21</td> <td>1.30</td> <td>7.18</td> <td>1.81</td> <td>16.57</td> <td>4.77</td> </tr> <tr> <td>Rel. Inten. (% of BP)</td> <td>0.01</td> <td>0.42</td> <td>3.31</td> <td>10.08</td> <td>9.40</td> <td>11.24</td> <td>9.80</td> <td>8.44</td> <td>23.01</td> <td>7.71</td> <td>100.00</td> <td>13.28</td> <td>8.67</td> <td>8.09</td> <td>35.11</td> <td>9.43</td> <td>17.38</td> <td>11.33</td> <td>32.24</td> <td>49.66</td> <td>7.00</td> <td>38.71</td> <td>9.75</td> <td>88.35</td> <td>25.74</td> </tr> <tr> <td>Score</td> <td>0.20</td> <td>0.50</td> <td>0.22</td> <td>-0.10</td> <td>0.50</td> <td>1.50</td> <td>-0.10</td> <td>0.75</td> <td>-0.23</td> <td>1.50</td> <td>0.50</td> <td>0.75</td> <td>-0.09</td> <td>1.50</td> <td>0.50</td> <td>1.50</td> <td>1.50</td> <td>1.50</td> <td>1.50</td> <td>1.50</td> <td>-0.07</td> <td>1.50</td> <td>0.50</td> <td>1.50</td> <td>1.50</td> </tr> <tr> <td>Ion-type</td> <td>PR</td> <td>V</td> <td>LI</td> <td></td> <td>b<sub>1</sub></td> <td>y<sub>1</sub></td> <td></td> <td>WN</td> <td></td> <td>y<sub>2</sub></td> <td>b<sub>2</sub></td> <td>WN</td> <td></td> <td>y<sub>3</sub></td> <td>b<sub>3</sub></td> <td>y<sub>4</sub></td> <td>b<sub>4</sub></td> <td>y<sub>5</sub><sup>+2</sup></td> <td>y<sub>6</sub></td> <td>y<sub>7</sub></td> <td>y<sub>8</sub></td> <td>y<sub>9</sub>-NH<sub>2</sub></td> <td>y<sub>10</sub></td> <td>y<sub>11</sub></td> </tr> <tr> <td>Delta ppm</td> <td>-0.4</td> <td>-25.0</td> <td>-4.9</td> <td></td> <td>-30.5</td> <td>-27.7</td> <td></td> <td>-14.5</td> <td></td> <td>-25.1</td> <td>-8.8</td> <td>-14.6</td> <td></td> <td>-13.3</td> <td>-9.7</td> <td>2.3</td> <td>-3.5</td> <td>-13.4</td> <td>0.8</td> <td>-4.4</td> <td></td> <td>-9.0</td> <td>-13.7</td> <td>-0.8</td> <td>-10.5</td> </tr> </tbody> </table> |        |         |        |                  |                                   |                                 |                            |                             |                 |                |                |                   |                                  | Fragment-Ion (m/z) | 70.086         | 72.078         | 88.098         | 120.080                      | 174.090        | 175.114        | 185.184        | 214.117                         | 279.134         | 288.186         | 315.172  | 327.189 | 355.194 | 389.246 | 414.238 | 618.284 | 628.284 | 666.794 <sup>+2</sup> | 832.337 | 731.401 | 784.412 | 817.478 | 1014.488 | 1081.628 | 1130.583 | Frag. Inten. (% of TIC) | 0.00 | 0.08 | 0.51 | 1.87 | 1.74 | 2.08 | 1.82 | 1.57 | 4.27 | 1.43 | 18.55 | 2.46 | 1.51 | 1.50 | 6.51 | 1.75 | 3.21 | 2.10 | 5.98 | 9.21 | 1.30 | 7.18 | 1.81 | 16.57 | 4.77 | Rel. Inten. (% of BP) | 0.01 | 0.42 | 3.31 | 10.08 | 9.40 | 11.24 | 9.80 | 8.44 | 23.01 | 7.71 | 100.00 | 13.28 | 8.67 | 8.09 | 35.11 | 9.43 | 17.38 | 11.33 | 32.24 | 49.66 | 7.00 | 38.71 | 9.75 | 88.35 | 25.74 | Score | 0.20 | 0.50 | 0.22 | -0.10 | 0.50 | 1.50 | -0.10 | 0.75 | -0.23 | 1.50 | 0.50 | 0.75 | -0.09 | 1.50 | 0.50 | 1.50 | 1.50 | 1.50 | 1.50 | 1.50 | -0.07 | 1.50 | 0.50 | 1.50 | 1.50 | Ion-type | PR | V | LI |  | b <sub>1</sub> | y <sub>1</sub> |  | WN |  | y <sub>2</sub> | b <sub>2</sub> | WN |  | y <sub>3</sub> | b <sub>3</sub> | y <sub>4</sub> | b <sub>4</sub> | y <sub>5</sub> <sup>+2</sup> | y <sub>6</sub> | y <sub>7</sub> | y <sub>8</sub> | y <sub>9</sub> -NH <sub>2</sub> | y <sub>10</sub> | y <sub>11</sub> | Delta ppm | -0.4 | -25.0 | -4.9 |  | -30.5 | -27.7 |  | -14.5 |  | -25.1 | -8.8 | -14.6 |  | -13.3 | -9.7 | 2.3 | -3.5 | -13.4 | 0.8 | -4.4 |  | -9.0 | -13.7 | -0.8 | -10.5 |
| Fragment-Ion (m/z)                                                                                                                                                                                                                                                                                                                                                                                                                                                                                                                                                                                                                                                                                                                                                                                                                                                                                                                                                                                                                                                                                                                                                                                                                                                                                                                                                                                                                                                                                                                                                                                                                                                                                                                                                                                                                                                                                                                                                                                                                                                                                                                                                                                                                                                                                                                                                                                                                                                                                                                                                                                                                                                                               | 70.086 | 72.078  | 88.098 | 120.080          | 174.090                           | 175.114                         | 185.184                    | 214.117                     | 279.134         | 288.186        | 315.172        | 327.189           | 355.194                          | 389.246            | 414.238        | 618.284        | 628.284        | 666.794 <sup>+2</sup>        | 832.337        | 731.401        | 784.412        | 817.478                         | 1014.488        | 1081.628        | 1130.583 |         |         |         |         |         |         |                       |         |         |         |         |          |          |          |                         |      |      |      |      |      |      |      |      |      |      |       |      |      |      |      |      |      |      |      |      |      |      |      |       |      |                       |      |      |      |       |      |       |      |      |       |      |        |       |      |      |       |      |       |       |       |       |      |       |      |       |       |       |      |      |      |       |      |      |       |      |       |      |      |      |       |      |      |      |      |      |      |      |       |      |      |      |      |          |    |   |    |  |                |                |  |    |  |                |                |    |  |                |                |                |                |                              |                |                |                |                                 |                 |                 |           |      |       |      |  |       |       |  |       |  |       |      |       |  |       |      |     |      |       |     |      |  |      |       |      |       |
| Frag. Inten. (% of TIC)                                                                                                                                                                                                                                                                                                                                                                                                                                                                                                                                                                                                                                                                                                                                                                                                                                                                                                                                                                                                                                                                                                                                                                                                                                                                                                                                                                                                                                                                                                                                                                                                                                                                                                                                                                                                                                                                                                                                                                                                                                                                                                                                                                                                                                                                                                                                                                                                                                                                                                                                                                                                                                                                          | 0.00   | 0.08    | 0.51   | 1.87             | 1.74                              | 2.08                            | 1.82                       | 1.57                        | 4.27            | 1.43           | 18.55          | 2.46              | 1.51                             | 1.50               | 6.51           | 1.75           | 3.21           | 2.10                         | 5.98           | 9.21           | 1.30           | 7.18                            | 1.81            | 16.57           | 4.77     |         |         |         |         |         |         |                       |         |         |         |         |          |          |          |                         |      |      |      |      |      |      |      |      |      |      |       |      |      |      |      |      |      |      |      |      |      |      |      |       |      |                       |      |      |      |       |      |       |      |      |       |      |        |       |      |      |       |      |       |       |       |       |      |       |      |       |       |       |      |      |      |       |      |      |       |      |       |      |      |      |       |      |      |      |      |      |      |      |       |      |      |      |      |          |    |   |    |  |                |                |  |    |  |                |                |    |  |                |                |                |                |                              |                |                |                |                                 |                 |                 |           |      |       |      |  |       |       |  |       |  |       |      |       |  |       |      |     |      |       |     |      |  |      |       |      |       |
| Rel. Inten. (% of BP)                                                                                                                                                                                                                                                                                                                                                                                                                                                                                                                                                                                                                                                                                                                                                                                                                                                                                                                                                                                                                                                                                                                                                                                                                                                                                                                                                                                                                                                                                                                                                                                                                                                                                                                                                                                                                                                                                                                                                                                                                                                                                                                                                                                                                                                                                                                                                                                                                                                                                                                                                                                                                                                                            | 0.01   | 0.42    | 3.31   | 10.08            | 9.40                              | 11.24                           | 9.80                       | 8.44                        | 23.01           | 7.71           | 100.00         | 13.28             | 8.67                             | 8.09               | 35.11          | 9.43           | 17.38          | 11.33                        | 32.24          | 49.66          | 7.00           | 38.71                           | 9.75            | 88.35           | 25.74    |         |         |         |         |         |         |                       |         |         |         |         |          |          |          |                         |      |      |      |      |      |      |      |      |      |      |       |      |      |      |      |      |      |      |      |      |      |      |      |       |      |                       |      |      |      |       |      |       |      |      |       |      |        |       |      |      |       |      |       |       |       |       |      |       |      |       |       |       |      |      |      |       |      |      |       |      |       |      |      |      |       |      |      |      |      |      |      |      |       |      |      |      |      |          |    |   |    |  |                |                |  |    |  |                |                |    |  |                |                |                |                |                              |                |                |                |                                 |                 |                 |           |      |       |      |  |       |       |  |       |  |       |      |       |  |       |      |     |      |       |     |      |  |      |       |      |       |
| Score                                                                                                                                                                                                                                                                                                                                                                                                                                                                                                                                                                                                                                                                                                                                                                                                                                                                                                                                                                                                                                                                                                                                                                                                                                                                                                                                                                                                                                                                                                                                                                                                                                                                                                                                                                                                                                                                                                                                                                                                                                                                                                                                                                                                                                                                                                                                                                                                                                                                                                                                                                                                                                                                                            | 0.20   | 0.50    | 0.22   | -0.10            | 0.50                              | 1.50                            | -0.10                      | 0.75                        | -0.23           | 1.50           | 0.50           | 0.75              | -0.09                            | 1.50               | 0.50           | 1.50           | 1.50           | 1.50                         | 1.50           | 1.50           | -0.07          | 1.50                            | 0.50            | 1.50            | 1.50     |         |         |         |         |         |         |                       |         |         |         |         |          |          |          |                         |      |      |      |      |      |      |      |      |      |      |       |      |      |      |      |      |      |      |      |      |      |      |      |       |      |                       |      |      |      |       |      |       |      |      |       |      |        |       |      |      |       |      |       |       |       |       |      |       |      |       |       |       |      |      |      |       |      |      |       |      |       |      |      |      |       |      |      |      |      |      |      |      |       |      |      |      |      |          |    |   |    |  |                |                |  |    |  |                |                |    |  |                |                |                |                |                              |                |                |                |                                 |                 |                 |           |      |       |      |  |       |       |  |       |  |       |      |       |  |       |      |     |      |       |     |      |  |      |       |      |       |
| Ion-type                                                                                                                                                                                                                                                                                                                                                                                                                                                                                                                                                                                                                                                                                                                                                                                                                                                                                                                                                                                                                                                                                                                                                                                                                                                                                                                                                                                                                                                                                                                                                                                                                                                                                                                                                                                                                                                                                                                                                                                                                                                                                                                                                                                                                                                                                                                                                                                                                                                                                                                                                                                                                                                                                         | PR     | V       | LI     |                  | b <sub>1</sub>                    | y <sub>1</sub>                  |                            | WN                          |                 | y <sub>2</sub> | b <sub>2</sub> | WN                |                                  | y <sub>3</sub>     | b <sub>3</sub> | y <sub>4</sub> | b <sub>4</sub> | y <sub>5</sub> <sup>+2</sup> | y <sub>6</sub> | y <sub>7</sub> | y <sub>8</sub> | y <sub>9</sub> -NH <sub>2</sub> | y <sub>10</sub> | y <sub>11</sub> |          |         |         |         |         |         |         |                       |         |         |         |         |          |          |          |                         |      |      |      |      |      |      |      |      |      |      |       |      |      |      |      |      |      |      |      |      |      |      |      |       |      |                       |      |      |      |       |      |       |      |      |       |      |        |       |      |      |       |      |       |       |       |       |      |       |      |       |       |       |      |      |      |       |      |      |       |      |       |      |      |      |       |      |      |      |      |      |      |      |       |      |      |      |      |          |    |   |    |  |                |                |  |    |  |                |                |    |  |                |                |                |                |                              |                |                |                |                                 |                 |                 |           |      |       |      |  |       |       |  |       |  |       |      |       |  |       |      |     |      |       |     |      |  |      |       |      |       |
| Delta ppm                                                                                                                                                                                                                                                                                                                                                                                                                                                                                                                                                                                                                                                                                                                                                                                                                                                                                                                                                                                                                                                                                                                                                                                                                                                                                                                                                                                                                                                                                                                                                                                                                                                                                                                                                                                                                                                                                                                                                                                                                                                                                                                                                                                                                                                                                                                                                                                                                                                                                                                                                                                                                                                                                        | -0.4   | -25.0   | -4.9   |                  | -30.5                             | -27.7                           |                            | -14.5                       |                 | -25.1          | -8.8           | -14.6             |                                  | -13.3              | -9.7           | 2.3            | -3.5           | -13.4                        | 0.8            | -4.4           |                | -9.0                            | -13.7           | -0.8            | -10.5    |         |         |         |         |         |         |                       |         |         |         |         |          |          |          |                         |      |      |      |      |      |      |      |      |      |      |       |      |      |      |      |      |      |      |      |      |      |      |      |       |      |                       |      |      |      |       |      |       |      |      |       |      |        |       |      |      |       |      |       |       |       |       |      |       |      |       |       |       |      |      |      |       |      |      |       |      |       |      |      |      |       |      |      |      |      |      |      |      |       |      |      |      |      |          |    |   |    |  |                |                |  |    |  |                |                |    |  |                |                |                |                |                              |                |                |                |                                 |                 |                 |           |      |       |      |  |       |       |  |       |  |       |      |       |  |       |      |     |      |       |     |      |  |      |       |      |       |

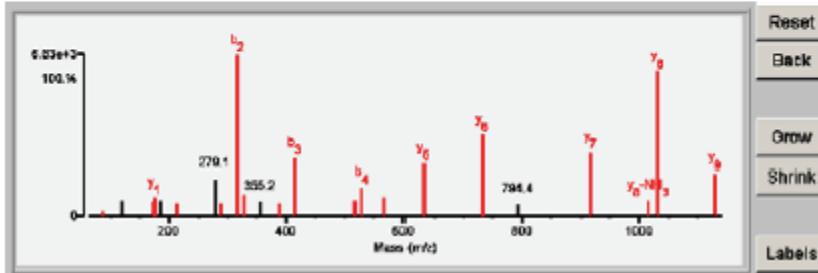

# C10

## Detailed Results

| Rank                                                                                                                                                                                                                                                                                                                                                                                                                                                                                                                                                                                                                                                                                                                                                                                                                                                                                                                                                                                                                                                                                                                                                                                                                                                                                                                                                                                                                                                                                                                                                                                                                                                                                                                                                                                                                                                                                                                                                                                                                                                                                                                                                                                                                                                                                                                                                                                                                                                                                                                                                                                                                                                                                     | Score  | SP1 (%) | BC8     | # Unmatched Ions | Sequence                            | MH <sup>+</sup> Calculated (Da) | MH <sup>+</sup> Error (Da) | MH <sup>+</sup> Error (ppm) | Protein MW (Da) | Species | Accession #   | M3-Digest Index # | Protein Name                                          |                    |                                                 |                               |         |                |                 |                 |                 |                 |                 |                 |          |         |         |         |                       |                       |         |         |         |         |         |          |          |          |          |                         |      |      |      |      |      |      |      |      |      |      |      |      |      |      |      |       |      |      |      |      |      |      |      |      |      |                       |      |      |      |      |      |      |      |       |      |      |      |      |      |      |      |        |      |      |      |      |      |      |      |      |      |       |      |      |      |      |      |      |       |      |      |      |       |      |      |       |      |      |       |       |      |       |       |       |       |      |      |          |    |    |       |    |                |     |  |                |                |       |  |                |       |  |                                                 |                               |  |                |                 |                 |                 |                 |                 |                 |           |      |     |       |      |      |      |  |      |      |      |  |       |      |  |      |      |  |      |  |  |  |  |  |     |       |
|------------------------------------------------------------------------------------------------------------------------------------------------------------------------------------------------------------------------------------------------------------------------------------------------------------------------------------------------------------------------------------------------------------------------------------------------------------------------------------------------------------------------------------------------------------------------------------------------------------------------------------------------------------------------------------------------------------------------------------------------------------------------------------------------------------------------------------------------------------------------------------------------------------------------------------------------------------------------------------------------------------------------------------------------------------------------------------------------------------------------------------------------------------------------------------------------------------------------------------------------------------------------------------------------------------------------------------------------------------------------------------------------------------------------------------------------------------------------------------------------------------------------------------------------------------------------------------------------------------------------------------------------------------------------------------------------------------------------------------------------------------------------------------------------------------------------------------------------------------------------------------------------------------------------------------------------------------------------------------------------------------------------------------------------------------------------------------------------------------------------------------------------------------------------------------------------------------------------------------------------------------------------------------------------------------------------------------------------------------------------------------------------------------------------------------------------------------------------------------------------------------------------------------------------------------------------------------------------------------------------------------------------------------------------------------------|--------|---------|---------|------------------|-------------------------------------|---------------------------------|----------------------------|-----------------------------|-----------------|---------|---------------|-------------------|-------------------------------------------------------|--------------------|-------------------------------------------------|-------------------------------|---------|----------------|-----------------|-----------------|-----------------|-----------------|-----------------|-----------------|----------|---------|---------|---------|-----------------------|-----------------------|---------|---------|---------|---------|---------|----------|----------|----------|----------|-------------------------|------|------|------|------|------|------|------|------|------|------|------|------|------|------|------|-------|------|------|------|------|------|------|------|------|------|-----------------------|------|------|------|------|------|------|------|-------|------|------|------|------|------|------|------|--------|------|------|------|------|------|------|------|------|------|-------|------|------|------|------|------|------|-------|------|------|------|-------|------|------|-------|------|------|-------|-------|------|-------|-------|-------|-------|------|------|----------|----|----|-------|----|----------------|-----|--|----------------|----------------|-------|--|----------------|-------|--|-------------------------------------------------|-------------------------------|--|----------------|-----------------|-----------------|-----------------|-----------------|-----------------|-----------------|-----------|------|-----|-------|------|------|------|--|------|------|------|--|-------|------|--|------|------|--|------|--|--|--|--|--|-----|-------|
| 1                                                                                                                                                                                                                                                                                                                                                                                                                                                                                                                                                                                                                                                                                                                                                                                                                                                                                                                                                                                                                                                                                                                                                                                                                                                                                                                                                                                                                                                                                                                                                                                                                                                                                                                                                                                                                                                                                                                                                                                                                                                                                                                                                                                                                                                                                                                                                                                                                                                                                                                                                                                                                                                                                        | 15.01  | 81.5    | 8       | 8/26             | (A) L P Y T D Q G Y T A F G V R (E) | 1898.7786                       | 0.0091                     | 5.3                         | 28131.85.48     | HUMAN   | Q76884 803388 |                   | Pre-mRNA-splicing factor SPF27 - Homo sapiens (Human) |                    |                                                 |                               |         |                |                 |                 |                 |                 |                 |                 |          |         |         |         |                       |                       |         |         |         |         |         |          |          |          |          |                         |      |      |      |      |      |      |      |      |      |      |      |      |      |      |      |       |      |      |      |      |      |      |      |      |      |                       |      |      |      |      |      |      |      |       |      |      |      |      |      |      |      |        |      |      |      |      |      |      |      |      |      |       |      |      |      |      |      |      |       |      |      |      |       |      |      |       |      |      |       |       |      |       |       |       |       |      |      |          |    |    |       |    |                |     |  |                |                |       |  |                |       |  |                                                 |                               |  |                |                 |                 |                 |                 |                 |                 |           |      |     |       |      |      |      |  |      |      |      |  |       |      |  |      |      |  |      |  |  |  |  |  |     |       |
| <table border="1"> <thead> <tr> <th>Fragment-Ion (m/z)</th> <th>70.088</th> <th>88.097</th> <th>238.122</th> <th>281.128</th> <th>288.143</th> <th>408.191</th> <th>418.227</th> <th>428.281</th> <th>488.288</th> <th>628.218</th> <th>663.330</th> <th>828.334</th> <th>851.278</th> <th>883.304</th> <th>740.844<sup>+2</sup></th> <th>748.850<sup>+2</sup></th> <th>807.898</th> <th>882.416</th> <th>878.485</th> <th>981.453</th> <th>981.894</th> <th>1000.417</th> <th>1071.415</th> <th>1091.518</th> <th>1238.568</th> </tr> </thead> <tbody> <tr> <td>Frag. Inten. (% of TIC)</td> <td>0.00</td> <td>0.07</td> <td>1.70</td> <td>2.43</td> <td>1.79</td> <td>1.58</td> <td>1.78</td> <td>6.75</td> <td>3.57</td> <td>3.61</td> <td>2.00</td> <td>2.48</td> <td>3.05</td> <td>2.15</td> <td>2.25</td> <td>45.20</td> <td>4.41</td> <td>1.99</td> <td>1.82</td> <td>1.57</td> <td>1.63</td> <td>1.51</td> <td>1.45</td> <td>3.03</td> <td>2.19</td> </tr> <tr> <td>Rel. Inten. (% of BP)</td> <td>0.00</td> <td>0.16</td> <td>3.75</td> <td>5.38</td> <td>3.97</td> <td>3.45</td> <td>3.95</td> <td>14.95</td> <td>7.89</td> <td>7.98</td> <td>4.42</td> <td>5.45</td> <td>6.78</td> <td>4.76</td> <td>4.98</td> <td>100.00</td> <td>9.75</td> <td>4.40</td> <td>4.02</td> <td>3.46</td> <td>3.62</td> <td>3.35</td> <td>3.20</td> <td>6.70</td> <td>4.84</td> </tr> <tr> <td>Score</td> <td>0.20</td> <td>0.22</td> <td>0.50</td> <td>0.75</td> <td>0.50</td> <td>0.75</td> <td>-0.04</td> <td>1.50</td> <td>1.50</td> <td>0.75</td> <td>-0.04</td> <td>1.50</td> <td>0.75</td> <td>-0.05</td> <td>0.50</td> <td>1.50</td> <td>-0.10</td> <td>-0.04</td> <td>1.50</td> <td>-0.03</td> <td>-0.04</td> <td>-0.03</td> <td>-0.03</td> <td>1.50</td> <td>1.50</td> </tr> <tr> <td>Ion-type</td> <td>PR</td> <td>LI</td> <td>PY-28</td> <td>PY</td> <td>b<sub>2</sub></td> <td>PYF</td> <td></td> <td>y<sub>3</sub></td> <td>y<sub>4</sub></td> <td>PYFDQ</td> <td></td> <td>y<sub>8</sub></td> <td>PYFDG</td> <td></td> <td>y<sub>13</sub>-H<sub>2</sub>O<sup>+2</sup></td> <td>y<sub>13</sub><sup>+2</sup></td> <td></td> <td>y<sub>9</sub></td> <td>y<sub>10</sub></td> <td>y<sub>11</sub></td> <td>y<sub>12</sub></td> <td>y<sub>13</sub></td> <td>y<sub>14</sub></td> <td>y<sub>15</sub></td> </tr> <tr> <td>Delta ppm</td> <td>15.8</td> <td>2.0</td> <td>-31.1</td> <td>-4.1</td> <td>-2.6</td> <td>-3.6</td> <td></td> <td>-2.1</td> <td>-6.4</td> <td>-3.5</td> <td></td> <td>-11.8</td> <td>-4.3</td> <td></td> <td>-3.4</td> <td>-2.7</td> <td></td> <td>-0.1</td> <td></td> <td></td> <td></td> <td></td> <td></td> <td>3.7</td> <td>-16.7</td> </tr> </tbody> </table> |        |         |         |                  |                                     |                                 |                            |                             |                 |         |               |                   |                                                       | Fragment-Ion (m/z) | 70.088                                          | 88.097                        | 238.122 | 281.128        | 288.143         | 408.191         | 418.227         | 428.281         | 488.288         | 628.218         | 663.330  | 828.334 | 851.278 | 883.304 | 740.844 <sup>+2</sup> | 748.850 <sup>+2</sup> | 807.898 | 882.416 | 878.485 | 981.453 | 981.894 | 1000.417 | 1071.415 | 1091.518 | 1238.568 | Frag. Inten. (% of TIC) | 0.00 | 0.07 | 1.70 | 2.43 | 1.79 | 1.58 | 1.78 | 6.75 | 3.57 | 3.61 | 2.00 | 2.48 | 3.05 | 2.15 | 2.25 | 45.20 | 4.41 | 1.99 | 1.82 | 1.57 | 1.63 | 1.51 | 1.45 | 3.03 | 2.19 | Rel. Inten. (% of BP) | 0.00 | 0.16 | 3.75 | 5.38 | 3.97 | 3.45 | 3.95 | 14.95 | 7.89 | 7.98 | 4.42 | 5.45 | 6.78 | 4.76 | 4.98 | 100.00 | 9.75 | 4.40 | 4.02 | 3.46 | 3.62 | 3.35 | 3.20 | 6.70 | 4.84 | Score | 0.20 | 0.22 | 0.50 | 0.75 | 0.50 | 0.75 | -0.04 | 1.50 | 1.50 | 0.75 | -0.04 | 1.50 | 0.75 | -0.05 | 0.50 | 1.50 | -0.10 | -0.04 | 1.50 | -0.03 | -0.04 | -0.03 | -0.03 | 1.50 | 1.50 | Ion-type | PR | LI | PY-28 | PY | b <sub>2</sub> | PYF |  | y <sub>3</sub> | y <sub>4</sub> | PYFDQ |  | y <sub>8</sub> | PYFDG |  | y <sub>13</sub> -H <sub>2</sub> O <sup>+2</sup> | y <sub>13</sub> <sup>+2</sup> |  | y <sub>9</sub> | y <sub>10</sub> | y <sub>11</sub> | y <sub>12</sub> | y <sub>13</sub> | y <sub>14</sub> | y <sub>15</sub> | Delta ppm | 15.8 | 2.0 | -31.1 | -4.1 | -2.6 | -3.6 |  | -2.1 | -6.4 | -3.5 |  | -11.8 | -4.3 |  | -3.4 | -2.7 |  | -0.1 |  |  |  |  |  | 3.7 | -16.7 |
| Fragment-Ion (m/z)                                                                                                                                                                                                                                                                                                                                                                                                                                                                                                                                                                                                                                                                                                                                                                                                                                                                                                                                                                                                                                                                                                                                                                                                                                                                                                                                                                                                                                                                                                                                                                                                                                                                                                                                                                                                                                                                                                                                                                                                                                                                                                                                                                                                                                                                                                                                                                                                                                                                                                                                                                                                                                                                       | 70.088 | 88.097  | 238.122 | 281.128          | 288.143                             | 408.191                         | 418.227                    | 428.281                     | 488.288         | 628.218 | 663.330       | 828.334           | 851.278                                               | 883.304            | 740.844 <sup>+2</sup>                           | 748.850 <sup>+2</sup>         | 807.898 | 882.416        | 878.485         | 981.453         | 981.894         | 1000.417        | 1071.415        | 1091.518        | 1238.568 |         |         |         |                       |                       |         |         |         |         |         |          |          |          |          |                         |      |      |      |      |      |      |      |      |      |      |      |      |      |      |      |       |      |      |      |      |      |      |      |      |      |                       |      |      |      |      |      |      |      |       |      |      |      |      |      |      |      |        |      |      |      |      |      |      |      |      |      |       |      |      |      |      |      |      |       |      |      |      |       |      |      |       |      |      |       |       |      |       |       |       |       |      |      |          |    |    |       |    |                |     |  |                |                |       |  |                |       |  |                                                 |                               |  |                |                 |                 |                 |                 |                 |                 |           |      |     |       |      |      |      |  |      |      |      |  |       |      |  |      |      |  |      |  |  |  |  |  |     |       |
| Frag. Inten. (% of TIC)                                                                                                                                                                                                                                                                                                                                                                                                                                                                                                                                                                                                                                                                                                                                                                                                                                                                                                                                                                                                                                                                                                                                                                                                                                                                                                                                                                                                                                                                                                                                                                                                                                                                                                                                                                                                                                                                                                                                                                                                                                                                                                                                                                                                                                                                                                                                                                                                                                                                                                                                                                                                                                                                  | 0.00   | 0.07    | 1.70    | 2.43             | 1.79                                | 1.58                            | 1.78                       | 6.75                        | 3.57            | 3.61    | 2.00          | 2.48              | 3.05                                                  | 2.15               | 2.25                                            | 45.20                         | 4.41    | 1.99           | 1.82            | 1.57            | 1.63            | 1.51            | 1.45            | 3.03            | 2.19     |         |         |         |                       |                       |         |         |         |         |         |          |          |          |          |                         |      |      |      |      |      |      |      |      |      |      |      |      |      |      |      |       |      |      |      |      |      |      |      |      |      |                       |      |      |      |      |      |      |      |       |      |      |      |      |      |      |      |        |      |      |      |      |      |      |      |      |      |       |      |      |      |      |      |      |       |      |      |      |       |      |      |       |      |      |       |       |      |       |       |       |       |      |      |          |    |    |       |    |                |     |  |                |                |       |  |                |       |  |                                                 |                               |  |                |                 |                 |                 |                 |                 |                 |           |      |     |       |      |      |      |  |      |      |      |  |       |      |  |      |      |  |      |  |  |  |  |  |     |       |
| Rel. Inten. (% of BP)                                                                                                                                                                                                                                                                                                                                                                                                                                                                                                                                                                                                                                                                                                                                                                                                                                                                                                                                                                                                                                                                                                                                                                                                                                                                                                                                                                                                                                                                                                                                                                                                                                                                                                                                                                                                                                                                                                                                                                                                                                                                                                                                                                                                                                                                                                                                                                                                                                                                                                                                                                                                                                                                    | 0.00   | 0.16    | 3.75    | 5.38             | 3.97                                | 3.45                            | 3.95                       | 14.95                       | 7.89            | 7.98    | 4.42          | 5.45              | 6.78                                                  | 4.76               | 4.98                                            | 100.00                        | 9.75    | 4.40           | 4.02            | 3.46            | 3.62            | 3.35            | 3.20            | 6.70            | 4.84     |         |         |         |                       |                       |         |         |         |         |         |          |          |          |          |                         |      |      |      |      |      |      |      |      |      |      |      |      |      |      |      |       |      |      |      |      |      |      |      |      |      |                       |      |      |      |      |      |      |      |       |      |      |      |      |      |      |      |        |      |      |      |      |      |      |      |      |      |       |      |      |      |      |      |      |       |      |      |      |       |      |      |       |      |      |       |       |      |       |       |       |       |      |      |          |    |    |       |    |                |     |  |                |                |       |  |                |       |  |                                                 |                               |  |                |                 |                 |                 |                 |                 |                 |           |      |     |       |      |      |      |  |      |      |      |  |       |      |  |      |      |  |      |  |  |  |  |  |     |       |
| Score                                                                                                                                                                                                                                                                                                                                                                                                                                                                                                                                                                                                                                                                                                                                                                                                                                                                                                                                                                                                                                                                                                                                                                                                                                                                                                                                                                                                                                                                                                                                                                                                                                                                                                                                                                                                                                                                                                                                                                                                                                                                                                                                                                                                                                                                                                                                                                                                                                                                                                                                                                                                                                                                                    | 0.20   | 0.22    | 0.50    | 0.75             | 0.50                                | 0.75                            | -0.04                      | 1.50                        | 1.50            | 0.75    | -0.04         | 1.50              | 0.75                                                  | -0.05              | 0.50                                            | 1.50                          | -0.10   | -0.04          | 1.50            | -0.03           | -0.04           | -0.03           | -0.03           | 1.50            | 1.50     |         |         |         |                       |                       |         |         |         |         |         |          |          |          |          |                         |      |      |      |      |      |      |      |      |      |      |      |      |      |      |      |       |      |      |      |      |      |      |      |      |      |                       |      |      |      |      |      |      |      |       |      |      |      |      |      |      |      |        |      |      |      |      |      |      |      |      |      |       |      |      |      |      |      |      |       |      |      |      |       |      |      |       |      |      |       |       |      |       |       |       |       |      |      |          |    |    |       |    |                |     |  |                |                |       |  |                |       |  |                                                 |                               |  |                |                 |                 |                 |                 |                 |                 |           |      |     |       |      |      |      |  |      |      |      |  |       |      |  |      |      |  |      |  |  |  |  |  |     |       |
| Ion-type                                                                                                                                                                                                                                                                                                                                                                                                                                                                                                                                                                                                                                                                                                                                                                                                                                                                                                                                                                                                                                                                                                                                                                                                                                                                                                                                                                                                                                                                                                                                                                                                                                                                                                                                                                                                                                                                                                                                                                                                                                                                                                                                                                                                                                                                                                                                                                                                                                                                                                                                                                                                                                                                                 | PR     | LI      | PY-28   | PY               | b <sub>2</sub>                      | PYF                             |                            | y <sub>3</sub>              | y <sub>4</sub>  | PYFDQ   |               | y <sub>8</sub>    | PYFDG                                                 |                    | y <sub>13</sub> -H <sub>2</sub> O <sup>+2</sup> | y <sub>13</sub> <sup>+2</sup> |         | y <sub>9</sub> | y <sub>10</sub> | y <sub>11</sub> | y <sub>12</sub> | y <sub>13</sub> | y <sub>14</sub> | y <sub>15</sub> |          |         |         |         |                       |                       |         |         |         |         |         |          |          |          |          |                         |      |      |      |      |      |      |      |      |      |      |      |      |      |      |      |       |      |      |      |      |      |      |      |      |      |                       |      |      |      |      |      |      |      |       |      |      |      |      |      |      |      |        |      |      |      |      |      |      |      |      |      |       |      |      |      |      |      |      |       |      |      |      |       |      |      |       |      |      |       |       |      |       |       |       |       |      |      |          |    |    |       |    |                |     |  |                |                |       |  |                |       |  |                                                 |                               |  |                |                 |                 |                 |                 |                 |                 |           |      |     |       |      |      |      |  |      |      |      |  |       |      |  |      |      |  |      |  |  |  |  |  |     |       |
| Delta ppm                                                                                                                                                                                                                                                                                                                                                                                                                                                                                                                                                                                                                                                                                                                                                                                                                                                                                                                                                                                                                                                                                                                                                                                                                                                                                                                                                                                                                                                                                                                                                                                                                                                                                                                                                                                                                                                                                                                                                                                                                                                                                                                                                                                                                                                                                                                                                                                                                                                                                                                                                                                                                                                                                | 15.8   | 2.0     | -31.1   | -4.1             | -2.6                                | -3.6                            |                            | -2.1                        | -6.4            | -3.5    |               | -11.8             | -4.3                                                  |                    | -3.4                                            | -2.7                          |         | -0.1           |                 |                 |                 |                 |                 | 3.7             | -16.7    |         |         |         |                       |                       |         |         |         |         |         |          |          |          |          |                         |      |      |      |      |      |      |      |      |      |      |      |      |      |      |      |       |      |      |      |      |      |      |      |      |      |                       |      |      |      |      |      |      |      |       |      |      |      |      |      |      |      |        |      |      |      |      |      |      |      |      |      |       |      |      |      |      |      |      |       |      |      |      |       |      |      |       |      |      |       |       |      |       |       |       |       |      |      |          |    |    |       |    |                |     |  |                |                |       |  |                |       |  |                                                 |                               |  |                |                 |                 |                 |                 |                 |                 |           |      |     |       |      |      |      |  |      |      |      |  |       |      |  |      |      |  |      |  |  |  |  |  |     |       |

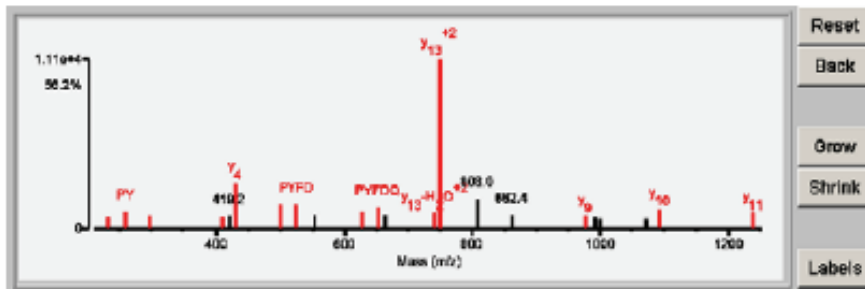



# C11

## Detailed Results

| Rank                    | Score  | SP1 (%) | BCS     | # Unmatched Ions | Sequence                                             | MH <sup>+</sup> Calculated (Da) | MH <sup>+</sup> Error (Da) | MH <sup>+</sup> Error (ppm) | Protein MW (Da) | Species | Accession #   | MS-Digest Index #                                                               | Protein Name |         |         |         |         |         |         |         |         |         |          |          |          |
|-------------------------|--------|---------|---------|------------------|------------------------------------------------------|---------------------------------|----------------------------|-----------------------------|-----------------|---------|---------------|---------------------------------------------------------------------------------|--------------|---------|---------|---------|---------|---------|---------|---------|---------|---------|----------|----------|----------|
| 1                       | 17.41  | 78.9    | 13      | 8/25             | (N)G D V C V Q D C L I Q M V T F D I I Q T A T R (T) | 2182.9800                       | 0.0173                     | 7.9                         | 58113.115.07    | HUMAN   | P07802 583787 | Proactivator polypeptide precursor [Contains: Saposin-A - Homo sapiens (Human)] |              |         |         |         |         |         |         |         |         |         |          |          |          |
| Fragment-Ion (m/z)      | 72.081 | 88.097  | 104.066 | 188.087          | 206.087                                              | 282.121                         | 274.188                    | 332.129                     | 346.227         | 380.120 | 448.288       | 483.130                                                                         | 583.188      | 674.322 | 683.230 | 882.281 | 887.404 | 802.441 | 808.227 | 822.308 | 803.484 | 821.378 | 1002.668 | 1133.588 | 1261.852 |
| Frag. Inten. (% of TIC) | 0.91   | 0.25    | 2.74    | 2.98             | 3.64                                                 | 2.10                            | 2.86                       | 5.67                        | 3.03            | 7.68    | 5.02          | 4.19                                                                            | 2.93         | 7.68    | 2.45    | 2.18    | 3.70    | 5.95    | 2.25    | 2.25    | 16.09   | 2.80    | 3.54     | 4.75     | 2.38     |
| Rel. Inten. (% of BP)   | 5.63   | 1.54    | 17.01   | 18.50            | 22.66                                                | 13.03                           | 17.76                      | 35.22                       | 18.84           | 47.72   | 31.22         | 25.07                                                                           | 18.18        | 47.72   | 15.20   | 13.54   | 22.97   | 36.97   | 14.01   | 13.95   | 100.00  | 17.39   | 22.00    | 29.51    | 14.79    |
| Score                   | 0.50   | 0.22    | -0.17   | -0.18            | -0.23                                                | -0.13                           | 1.50                       | 0.75                        | 1.50            | 0.50    | 1.50          | 0.50                                                                            | 0.75         | 1.50    | -0.15   | -0.14   | 1.50    | 1.50    | 0.50    | -0.14   | 1.50    | -0.17   | 1.50     | 1.50     | 1.50     |
| Ion-type                | V      | LI      |         |                  |                                                      |                                 | y2                         | a3                          | y3              | b3      | y4            | b4                                                                              | a5           | y5      |         |         | y6      | y7      | b7      |         | y8      |         | y9       | y10      | y11      |
| Delta ppm               | 8.7    | 5.5     |         |                  |                                                      |                                 | -3.9                       | 1.6                         | 6.4             | -11.1   | -6.9          | -5.1                                                                            | -15.5        | -16.1   |         |         | -16.3   | -0.8    | -0.1    |         | 5.3     | 1.1     | -9.4     | -4.0     |          |

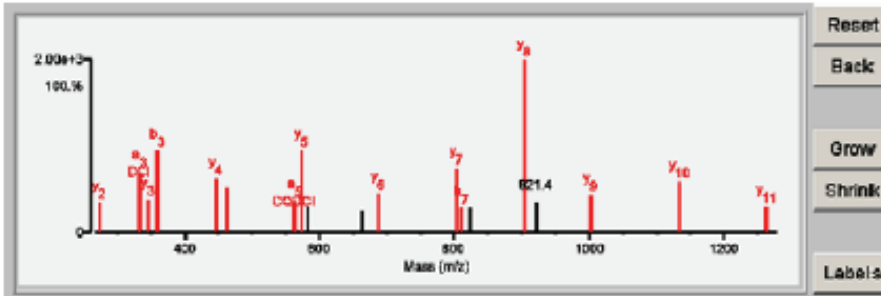

# C12

## Detailed Results

| Rank                    | Score  | SP1 (%) | BCS     | # Unmatched Ions | Sequence                                       | MH <sup>+</sup> Calculated (Da) | MH <sup>+</sup> Error (Da) | MH <sup>+</sup> Error (ppm) | Protein MW (Da) | Species | Accession #   | MS-Digest Index #                             | Protein Name                                    |                               |                                                 |                               |                       |         |         |         |         |                                   |                 |                                   |          |
|-------------------------|--------|---------|---------|------------------|------------------------------------------------|---------------------------------|----------------------------|-----------------------------|-----------------|---------|---------------|-----------------------------------------------|-------------------------------------------------|-------------------------------|-------------------------------------------------|-------------------------------|-----------------------|---------|---------|---------|---------|-----------------------------------|-----------------|-----------------------------------|----------|
| 1                       | 15.19  | 78.1    | 12      | 5/26             | (N)E E A A L L E E R A T M T I R K L L Y R (Y) | 2387.1489                       | 0.0080                     | 3.3                         | 58271.84.27     | HUMAN   | O15355 428683 | Protein phosphatase 1G - Homo sapiens (Human) |                                                 |                               |                                                 |                               |                       |         |         |         |         |                                   |                 |                                   |          |
| Fragment-Ion (m/z)      | 88.089 | 102.068 | 104.063 | 176.118          | 278.167                                        | 347.081                         | 371.883 <sup>+2</sup>      | 388.253                     | 418.126         | 488.166 | 602.341       | 631.373                                       | 682.777 <sup>+2</sup>                           | 841.784 <sup>+2</sup>         | 742.616 <sup>+3</sup>                           | 748.828 <sup>+2</sup>         | 767.828 <sup>+2</sup> | 780.419 | 806.353 | 873.601 | 874.643 | 1181.482                          | 1284.656        | 1282.582                          | 1488.823 |
| Frag. Inten. (% of TIC) | 0.28   | 0.08    | 6.46    | 3.06             | 4.76                                           | 2.46                            | 2.09                       | 3.74                        | 3.33            | 4.12    | 2.17          | 3.88                                          | 3.23                                            | 2.79                          | 2.43                                            | 7.09                          | 5.83                  | 10.28   | 5.93    | 4.92    | 5.26    | 4.00                              | 4.98            | 3.67                              | 3.16     |
| Rel. Inten. (% of BP)   | 2.73   | 0.75    | 62.79   | 29.64            | 46.35                                          | 23.96                           | 20.37                      | 36.42                       | 32.40           | 40.05   | 21.10         | 37.73                                         | 31.44                                           | 27.17                         | 23.64                                           | 69.02                         | 56.74                 | 100.00  | 57.66   | 47.82   | 51.21   | 38.96                             | 48.46           | 35.66                             | 30.79    |
| Score                   | 0.22   | 1.00    | -0.63   | 1.50             | 1.50                                           | 0.50                            | -0.20                      | 1.50                        | 0.50            | 1.50    | 1.50          | 0.50                                          | 0.25                                            | 0.50                          | -0.24                                           | 0.25                          | 0.50                  | 1.50    | -0.58   | 1.50    | 1.50    | -0.39                             | 1.50            | 0.25                              | 0.25     |
| Ion-type                | LI     | E       |         | y1               | y2                                             | b2                              |                            | y3                          | b3              | b4      | y4            | y5                                            | b <sub>11</sub> +H <sub>2</sub> O <sup>+2</sup> | b <sub>11</sub> <sup>+2</sup> | b <sub>13</sub> +H <sub>2</sub> O <sup>+2</sup> | b <sub>13</sub> <sup>+2</sup> | y6                    |         | y7      | y8      |         | b <sub>11</sub> +H <sub>2</sub> O | b <sub>11</sub> | b <sub>13</sub> +H <sub>2</sub> O |          |
| Delta ppm               | 25.3   | 26.9    |         | -8.3             | -33.4                                          | -30.1                           |                            | 5.2                         | -8.3            | -22.4   | 13.2          | -7.4                                          | -4.7                                            | -1.1                          | 4.8                                             | -4.0                          | -1.4                  | -3.0    | -6.4    |         |         | 2.0                               | -1.2            | -12.0                             |          |

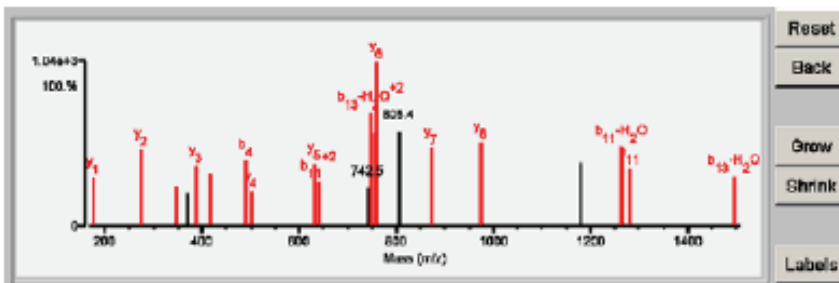



# C13

## Detailed Results

| Rank                                                                                                                                                                                                                                                                                                                                                                                                                                                                                                                                                                                                                                                                                                                                                                                                                                                                                                                                                                                                                                                                                                                                                                                                                                                                                                                                                                                                                                                                                                                                                                                                                                                                                                                                                                                                                                                                                                                                                                                                                                                                                                                                                                                                                                                                                                                                                                                                                                                                                                                                                                         | Score  | SPI (%) | BCS     | # Unmatched Ions | Sequence                             | MH <sup>+</sup> Calculated (Da) | MH <sup>+</sup> Error (Da) | MH <sup>+</sup> Error (ppm) | Protein MW (kDa) | Species | Accession #            | MS-Digest Index #      | Protein Name                                                                         |                    |         |         |         |                     |         |                     |         |                     |                     |         |                     |         |         |         |         |         |         |         |         |         |         |         |         |         |         |                         |      |      |      |      |      |      |      |      |      |      |      |       |      |      |      |      |      |      |      |      |      |      |       |      |      |                       |      |      |      |      |       |      |      |       |      |       |       |       |       |       |       |       |      |       |       |      |       |       |        |       |       |       |      |      |      |      |      |      |      |      |       |      |      |      |      |      |      |      |      |      |      |      |      |      |      |      |      |          |   |    |   |    |    |    |    |    |    |    |    |    |    |    |    |    |    |                     |    |                     |    |                     |                     |    |                     |           |      |     |      |      |       |      |      |     |  |      |     |      |      |     |     |     |      |      |     |       |     |      |     |       |     |
|------------------------------------------------------------------------------------------------------------------------------------------------------------------------------------------------------------------------------------------------------------------------------------------------------------------------------------------------------------------------------------------------------------------------------------------------------------------------------------------------------------------------------------------------------------------------------------------------------------------------------------------------------------------------------------------------------------------------------------------------------------------------------------------------------------------------------------------------------------------------------------------------------------------------------------------------------------------------------------------------------------------------------------------------------------------------------------------------------------------------------------------------------------------------------------------------------------------------------------------------------------------------------------------------------------------------------------------------------------------------------------------------------------------------------------------------------------------------------------------------------------------------------------------------------------------------------------------------------------------------------------------------------------------------------------------------------------------------------------------------------------------------------------------------------------------------------------------------------------------------------------------------------------------------------------------------------------------------------------------------------------------------------------------------------------------------------------------------------------------------------------------------------------------------------------------------------------------------------------------------------------------------------------------------------------------------------------------------------------------------------------------------------------------------------------------------------------------------------------------------------------------------------------------------------------------------------|--------|---------|---------|------------------|--------------------------------------|---------------------------------|----------------------------|-----------------------------|------------------|---------|------------------------|------------------------|--------------------------------------------------------------------------------------|--------------------|---------|---------|---------|---------------------|---------|---------------------|---------|---------------------|---------------------|---------|---------------------|---------|---------|---------|---------|---------|---------|---------|---------|---------|---------|---------|---------|---------|---------|-------------------------|------|------|------|------|------|------|------|------|------|------|------|-------|------|------|------|------|------|------|------|------|------|------|-------|------|------|-----------------------|------|------|------|------|-------|------|------|-------|------|-------|-------|-------|-------|-------|-------|-------|------|-------|-------|------|-------|-------|--------|-------|-------|-------|------|------|------|------|------|------|------|------|-------|------|------|------|------|------|------|------|------|------|------|------|------|------|------|------|------|----------|---|----|---|----|----|----|----|----|----|----|----|----|----|----|----|----|----|---------------------|----|---------------------|----|---------------------|---------------------|----|---------------------|-----------|------|-----|------|------|-------|------|------|-----|--|------|-----|------|------|-----|-----|-----|------|------|-----|-------|-----|------|-----|-------|-----|
| 1                                                                                                                                                                                                                                                                                                                                                                                                                                                                                                                                                                                                                                                                                                                                                                                                                                                                                                                                                                                                                                                                                                                                                                                                                                                                                                                                                                                                                                                                                                                                                                                                                                                                                                                                                                                                                                                                                                                                                                                                                                                                                                                                                                                                                                                                                                                                                                                                                                                                                                                                                                            | 20.83  | 88.8    | 11      | 1/26             | (A) A/N/E/L/V/R(I/T/L/A/A/T/A/R) (E) | 1932.8828                       | 0.0077                     | 5.8                         | 88707.4/6.25     | HUMAN   | <a href="#">Q8P998</a> | <a href="#">407708</a> | Pyridoxal-dependent decarboxylase domain-containing protein 1 - Homo sapiens (Human) |                    |         |         |         |                     |         |                     |         |                     |                     |         |                     |         |         |         |         |         |         |         |         |         |         |         |         |         |         |                         |      |      |      |      |      |      |      |      |      |      |      |       |      |      |      |      |      |      |      |      |      |      |       |      |      |                       |      |      |      |      |       |      |      |       |      |       |       |       |       |       |       |       |      |       |       |      |       |       |        |       |       |       |      |      |      |      |      |      |      |      |       |      |      |      |      |      |      |      |      |      |      |      |      |      |      |      |      |          |   |    |   |    |    |    |    |    |    |    |    |    |    |    |    |    |    |                     |    |                     |    |                     |                     |    |                     |           |      |     |      |      |       |      |      |     |  |      |     |      |      |     |     |     |      |      |     |       |     |      |     |       |     |
| <table border="1"> <thead> <tr> <th>Fragment-Ion (m/z)</th> <th>72.081</th> <th>88.097</th> <th>102.068</th> <th>132.060</th> <th>160.042</th> <th>176.121</th> <th>248.169</th> <th>289.087</th> <th>290.088</th> <th>347.205</th> <th>374.178</th> <th>402.189</th> <th>418.240</th> <th>488.282</th> <th>501.243</th> <th>602.387</th> <th>680.281</th> <th>703.418</th> <th>713.323</th> <th>731.319</th> <th>814.444</th> <th>828.397</th> <th>832.464</th> <th>813.484</th> <th>931.624</th> </tr> </thead> <tbody> <tr> <td>Frag. Inten. (% of TIC)</td> <td>0.04</td> <td>0.16</td> <td>0.07</td> <td>1.16</td> <td>4.82</td> <td>1.25</td> <td>1.32</td> <td>8.46</td> <td>1.22</td> <td>3.38</td> <td>3.39</td> <td>12.35</td> <td>5.52</td> <td>7.88</td> <td>7.57</td> <td>3.03</td> <td>1.34</td> <td>5.43</td> <td>2.73</td> <td>1.25</td> <td>1.55</td> <td>3.83</td> <td>13.86</td> <td>1.89</td> <td>6.51</td> </tr> <tr> <td>Rel. Inten. (% of BP)</td> <td>0.25</td> <td>1.16</td> <td>0.52</td> <td>8.36</td> <td>34.80</td> <td>8.99</td> <td>9.54</td> <td>61.09</td> <td>8.77</td> <td>24.36</td> <td>24.49</td> <td>89.15</td> <td>39.85</td> <td>56.84</td> <td>54.82</td> <td>21.86</td> <td>9.70</td> <td>39.19</td> <td>19.68</td> <td>9.02</td> <td>11.19</td> <td>27.62</td> <td>100.00</td> <td>13.61</td> <td>46.96</td> </tr> <tr> <td>Score</td> <td>0.50</td> <td>0.22</td> <td>1.00</td> <td>0.50</td> <td>0.50</td> <td>1.50</td> <td>1.50</td> <td>0.50</td> <td>-0.09</td> <td>1.50</td> <td>0.50</td> <td>0.50</td> <td>1.50</td> <td>1.50</td> <td>0.50</td> <td>1.50</td> <td>0.50</td> <td>1.50</td> <td>0.25</td> <td>0.50</td> <td>0.50</td> <td>0.25</td> <td>1.50</td> <td>0.50</td> <td>1.50</td> </tr> <tr> <td>Ion-type</td> <td>V</td> <td>LI</td> <td>E</td> <td>a1</td> <td>b1</td> <td>y1</td> <td>y2</td> <td>b2</td> <td>y3</td> <td>a3</td> <td>b3</td> <td>y4</td> <td>y5</td> <td>b4</td> <td>y6</td> <td>b5</td> <td>y7</td> <td>b6-H<sub>2</sub>O</td> <td>y8</td> <td>b7-H<sub>2</sub>O</td> <td>y8</td> <td>b8-H<sub>2</sub>O</td> <td>b7-H<sub>2</sub>O</td> <td>y8</td> <td>y9-H<sub>2</sub>O</td> </tr> <tr> <td>Delta ppm</td> <td>-2.4</td> <td>6.7</td> <td>11.2</td> <td>10.2</td> <td>-11.1</td> <td>12.8</td> <td>11.5</td> <td>2.9</td> <td></td> <td>-3.0</td> <td>2.1</td> <td>-3.8</td> <td>-2.1</td> <td>8.0</td> <td>7.5</td> <td>8.2</td> <td>-1.0</td> <td>11.5</td> <td>6.9</td> <td>-13.6</td> <td>3.4</td> <td>-6.9</td> <td>2.0</td> <td>-17.5</td> <td>3.7</td> </tr> </tbody> </table> |        |         |         |                  |                                      |                                 |                            |                             |                  |         |                        |                        |                                                                                      | Fragment-Ion (m/z) | 72.081  | 88.097  | 102.068 | 132.060             | 160.042 | 176.121             | 248.169 | 289.087             | 290.088             | 347.205 | 374.178             | 402.189 | 418.240 | 488.282 | 501.243 | 602.387 | 680.281 | 703.418 | 713.323 | 731.319 | 814.444 | 828.397 | 832.464 | 813.484 | 931.624 | Frag. Inten. (% of TIC) | 0.04 | 0.16 | 0.07 | 1.16 | 4.82 | 1.25 | 1.32 | 8.46 | 1.22 | 3.38 | 3.39 | 12.35 | 5.52 | 7.88 | 7.57 | 3.03 | 1.34 | 5.43 | 2.73 | 1.25 | 1.55 | 3.83 | 13.86 | 1.89 | 6.51 | Rel. Inten. (% of BP) | 0.25 | 1.16 | 0.52 | 8.36 | 34.80 | 8.99 | 9.54 | 61.09 | 8.77 | 24.36 | 24.49 | 89.15 | 39.85 | 56.84 | 54.82 | 21.86 | 9.70 | 39.19 | 19.68 | 9.02 | 11.19 | 27.62 | 100.00 | 13.61 | 46.96 | Score | 0.50 | 0.22 | 1.00 | 0.50 | 0.50 | 1.50 | 1.50 | 0.50 | -0.09 | 1.50 | 0.50 | 0.50 | 1.50 | 1.50 | 0.50 | 1.50 | 0.50 | 1.50 | 0.25 | 0.50 | 0.50 | 0.25 | 1.50 | 0.50 | 1.50 | Ion-type | V | LI | E | a1 | b1 | y1 | y2 | b2 | y3 | a3 | b3 | y4 | y5 | b4 | y6 | b5 | y7 | b6-H <sub>2</sub> O | y8 | b7-H <sub>2</sub> O | y8 | b8-H <sub>2</sub> O | b7-H <sub>2</sub> O | y8 | y9-H <sub>2</sub> O | Delta ppm | -2.4 | 6.7 | 11.2 | 10.2 | -11.1 | 12.8 | 11.5 | 2.9 |  | -3.0 | 2.1 | -3.8 | -2.1 | 8.0 | 7.5 | 8.2 | -1.0 | 11.5 | 6.9 | -13.6 | 3.4 | -6.9 | 2.0 | -17.5 | 3.7 |
| Fragment-Ion (m/z)                                                                                                                                                                                                                                                                                                                                                                                                                                                                                                                                                                                                                                                                                                                                                                                                                                                                                                                                                                                                                                                                                                                                                                                                                                                                                                                                                                                                                                                                                                                                                                                                                                                                                                                                                                                                                                                                                                                                                                                                                                                                                                                                                                                                                                                                                                                                                                                                                                                                                                                                                           | 72.081 | 88.097  | 102.068 | 132.060          | 160.042                              | 176.121                         | 248.169                    | 289.087                     | 290.088          | 347.205 | 374.178                | 402.189                | 418.240                                                                              | 488.282            | 501.243 | 602.387 | 680.281 | 703.418             | 713.323 | 731.319             | 814.444 | 828.397             | 832.464             | 813.484 | 931.624             |         |         |         |         |         |         |         |         |         |         |         |         |         |         |                         |      |      |      |      |      |      |      |      |      |      |      |       |      |      |      |      |      |      |      |      |      |      |       |      |      |                       |      |      |      |      |       |      |      |       |      |       |       |       |       |       |       |       |      |       |       |      |       |       |        |       |       |       |      |      |      |      |      |      |      |      |       |      |      |      |      |      |      |      |      |      |      |      |      |      |      |      |      |          |   |    |   |    |    |    |    |    |    |    |    |    |    |    |    |    |    |                     |    |                     |    |                     |                     |    |                     |           |      |     |      |      |       |      |      |     |  |      |     |      |      |     |     |     |      |      |     |       |     |      |     |       |     |
| Frag. Inten. (% of TIC)                                                                                                                                                                                                                                                                                                                                                                                                                                                                                                                                                                                                                                                                                                                                                                                                                                                                                                                                                                                                                                                                                                                                                                                                                                                                                                                                                                                                                                                                                                                                                                                                                                                                                                                                                                                                                                                                                                                                                                                                                                                                                                                                                                                                                                                                                                                                                                                                                                                                                                                                                      | 0.04   | 0.16    | 0.07    | 1.16             | 4.82                                 | 1.25                            | 1.32                       | 8.46                        | 1.22             | 3.38    | 3.39                   | 12.35                  | 5.52                                                                                 | 7.88               | 7.57    | 3.03    | 1.34    | 5.43                | 2.73    | 1.25                | 1.55    | 3.83                | 13.86               | 1.89    | 6.51                |         |         |         |         |         |         |         |         |         |         |         |         |         |         |                         |      |      |      |      |      |      |      |      |      |      |      |       |      |      |      |      |      |      |      |      |      |      |       |      |      |                       |      |      |      |      |       |      |      |       |      |       |       |       |       |       |       |       |      |       |       |      |       |       |        |       |       |       |      |      |      |      |      |      |      |      |       |      |      |      |      |      |      |      |      |      |      |      |      |      |      |      |      |          |   |    |   |    |    |    |    |    |    |    |    |    |    |    |    |    |    |                     |    |                     |    |                     |                     |    |                     |           |      |     |      |      |       |      |      |     |  |      |     |      |      |     |     |     |      |      |     |       |     |      |     |       |     |
| Rel. Inten. (% of BP)                                                                                                                                                                                                                                                                                                                                                                                                                                                                                                                                                                                                                                                                                                                                                                                                                                                                                                                                                                                                                                                                                                                                                                                                                                                                                                                                                                                                                                                                                                                                                                                                                                                                                                                                                                                                                                                                                                                                                                                                                                                                                                                                                                                                                                                                                                                                                                                                                                                                                                                                                        | 0.25   | 1.16    | 0.52    | 8.36             | 34.80                                | 8.99                            | 9.54                       | 61.09                       | 8.77             | 24.36   | 24.49                  | 89.15                  | 39.85                                                                                | 56.84              | 54.82   | 21.86   | 9.70    | 39.19               | 19.68   | 9.02                | 11.19   | 27.62               | 100.00              | 13.61   | 46.96               |         |         |         |         |         |         |         |         |         |         |         |         |         |         |                         |      |      |      |      |      |      |      |      |      |      |      |       |      |      |      |      |      |      |      |      |      |      |       |      |      |                       |      |      |      |      |       |      |      |       |      |       |       |       |       |       |       |       |      |       |       |      |       |       |        |       |       |       |      |      |      |      |      |      |      |      |       |      |      |      |      |      |      |      |      |      |      |      |      |      |      |      |      |          |   |    |   |    |    |    |    |    |    |    |    |    |    |    |    |    |    |                     |    |                     |    |                     |                     |    |                     |           |      |     |      |      |       |      |      |     |  |      |     |      |      |     |     |     |      |      |     |       |     |      |     |       |     |
| Score                                                                                                                                                                                                                                                                                                                                                                                                                                                                                                                                                                                                                                                                                                                                                                                                                                                                                                                                                                                                                                                                                                                                                                                                                                                                                                                                                                                                                                                                                                                                                                                                                                                                                                                                                                                                                                                                                                                                                                                                                                                                                                                                                                                                                                                                                                                                                                                                                                                                                                                                                                        | 0.50   | 0.22    | 1.00    | 0.50             | 0.50                                 | 1.50                            | 1.50                       | 0.50                        | -0.09            | 1.50    | 0.50                   | 0.50                   | 1.50                                                                                 | 1.50               | 0.50    | 1.50    | 0.50    | 1.50                | 0.25    | 0.50                | 0.50    | 0.25                | 1.50                | 0.50    | 1.50                |         |         |         |         |         |         |         |         |         |         |         |         |         |         |                         |      |      |      |      |      |      |      |      |      |      |      |       |      |      |      |      |      |      |      |      |      |      |       |      |      |                       |      |      |      |      |       |      |      |       |      |       |       |       |       |       |       |       |      |       |       |      |       |       |        |       |       |       |      |      |      |      |      |      |      |      |       |      |      |      |      |      |      |      |      |      |      |      |      |      |      |      |      |          |   |    |   |    |    |    |    |    |    |    |    |    |    |    |    |    |    |                     |    |                     |    |                     |                     |    |                     |           |      |     |      |      |       |      |      |     |  |      |     |      |      |     |     |     |      |      |     |       |     |      |     |       |     |
| Ion-type                                                                                                                                                                                                                                                                                                                                                                                                                                                                                                                                                                                                                                                                                                                                                                                                                                                                                                                                                                                                                                                                                                                                                                                                                                                                                                                                                                                                                                                                                                                                                                                                                                                                                                                                                                                                                                                                                                                                                                                                                                                                                                                                                                                                                                                                                                                                                                                                                                                                                                                                                                     | V      | LI      | E       | a1               | b1                                   | y1                              | y2                         | b2                          | y3               | a3      | b3                     | y4                     | y5                                                                                   | b4                 | y6      | b5      | y7      | b6-H <sub>2</sub> O | y8      | b7-H <sub>2</sub> O | y8      | b8-H <sub>2</sub> O | b7-H <sub>2</sub> O | y8      | y9-H <sub>2</sub> O |         |         |         |         |         |         |         |         |         |         |         |         |         |         |                         |      |      |      |      |      |      |      |      |      |      |      |       |      |      |      |      |      |      |      |      |      |      |       |      |      |                       |      |      |      |      |       |      |      |       |      |       |       |       |       |       |       |       |      |       |       |      |       |       |        |       |       |       |      |      |      |      |      |      |      |      |       |      |      |      |      |      |      |      |      |      |      |      |      |      |      |      |      |          |   |    |   |    |    |    |    |    |    |    |    |    |    |    |    |    |    |                     |    |                     |    |                     |                     |    |                     |           |      |     |      |      |       |      |      |     |  |      |     |      |      |     |     |     |      |      |     |       |     |      |     |       |     |
| Delta ppm                                                                                                                                                                                                                                                                                                                                                                                                                                                                                                                                                                                                                                                                                                                                                                                                                                                                                                                                                                                                                                                                                                                                                                                                                                                                                                                                                                                                                                                                                                                                                                                                                                                                                                                                                                                                                                                                                                                                                                                                                                                                                                                                                                                                                                                                                                                                                                                                                                                                                                                                                                    | -2.4   | 6.7     | 11.2    | 10.2             | -11.1                                | 12.8                            | 11.5                       | 2.9                         |                  | -3.0    | 2.1                    | -3.8                   | -2.1                                                                                 | 8.0                | 7.5     | 8.2     | -1.0    | 11.5                | 6.9     | -13.6               | 3.4     | -6.9                | 2.0                 | -17.5   | 3.7                 |         |         |         |         |         |         |         |         |         |         |         |         |         |         |                         |      |      |      |      |      |      |      |      |      |      |      |       |      |      |      |      |      |      |      |      |      |      |       |      |      |                       |      |      |      |      |       |      |      |       |      |       |       |       |       |       |       |       |      |       |       |      |       |       |        |       |       |       |      |      |      |      |      |      |      |      |       |      |      |      |      |      |      |      |      |      |      |      |      |      |      |      |      |          |   |    |   |    |    |    |    |    |    |    |    |    |    |    |    |    |    |                     |    |                     |    |                     |                     |    |                     |           |      |     |      |      |       |      |      |     |  |      |     |      |      |     |     |     |      |      |     |       |     |      |     |       |     |

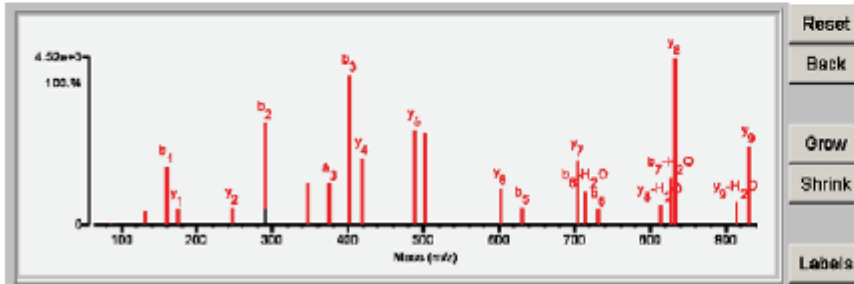

# C14

## Detailed Results

| Rank                                                                                                                                                                                                                                                                                                                                                                                                                                                                                                                                                                                                                                                                                                                                                                                                                                                                                                                                                                                                                                                                                                                                                                                                                                                                                                                                                                                                                                                                                                                                                                                                                                                                                                                                                                                                                                                                                                                                                                                                                                                                                                                                                                                                                                                                                                                                                                                                                                                                                                                                                                                          | Score  | SPI (%) | BCS     | # Unmatched Ions | Sequence                                | MH <sup>+</sup> Calculated (Da) | MH <sup>+</sup> Error (Da) | MH <sup>+</sup> Error (ppm) | Protein MW (kDa)    | Species | Accession #            | MS-Digest Index #   | Protein Name                                                                                             |                       |         |                       |         |                       |         |         |         |         |         |          |          |         |         |                       |         |                       |         |                       |         |         |         |         |         |          |          |                         |      |      |      |      |      |      |      |      |      |       |       |      |      |      |      |      |      |      |      |      |      |      |      |       |      |                       |      |      |      |      |       |       |      |      |      |       |       |      |      |       |      |       |      |       |       |      |      |      |      |        |       |       |      |      |      |      |      |      |      |       |      |      |      |       |      |      |      |      |      |       |      |      |       |       |       |      |      |          |    |   |    |    |                     |    |    |       |                     |    |    |    |    |                   |    |                   |    |    |    |    |  |  |  |     |     |           |      |      |      |       |       |      |       |  |       |      |      |  |     |      |       |      |       |       |     |  |  |  |  |      |      |
|-----------------------------------------------------------------------------------------------------------------------------------------------------------------------------------------------------------------------------------------------------------------------------------------------------------------------------------------------------------------------------------------------------------------------------------------------------------------------------------------------------------------------------------------------------------------------------------------------------------------------------------------------------------------------------------------------------------------------------------------------------------------------------------------------------------------------------------------------------------------------------------------------------------------------------------------------------------------------------------------------------------------------------------------------------------------------------------------------------------------------------------------------------------------------------------------------------------------------------------------------------------------------------------------------------------------------------------------------------------------------------------------------------------------------------------------------------------------------------------------------------------------------------------------------------------------------------------------------------------------------------------------------------------------------------------------------------------------------------------------------------------------------------------------------------------------------------------------------------------------------------------------------------------------------------------------------------------------------------------------------------------------------------------------------------------------------------------------------------------------------------------------------------------------------------------------------------------------------------------------------------------------------------------------------------------------------------------------------------------------------------------------------------------------------------------------------------------------------------------------------------------------------------------------------------------------------------------------------|--------|---------|---------|------------------|-----------------------------------------|---------------------------------|----------------------------|-----------------------------|---------------------|---------|------------------------|---------------------|----------------------------------------------------------------------------------------------------------|-----------------------|---------|-----------------------|---------|-----------------------|---------|---------|---------|---------|---------|----------|----------|---------|---------|-----------------------|---------|-----------------------|---------|-----------------------|---------|---------|---------|---------|---------|----------|----------|-------------------------|------|------|------|------|------|------|------|------|------|-------|-------|------|------|------|------|------|------|------|------|------|------|------|------|-------|------|-----------------------|------|------|------|------|-------|-------|------|------|------|-------|-------|------|------|-------|------|-------|------|-------|-------|------|------|------|------|--------|-------|-------|------|------|------|------|------|------|------|-------|------|------|------|-------|------|------|------|------|------|-------|------|------|-------|-------|-------|------|------|----------|----|---|----|----|---------------------|----|----|-------|---------------------|----|----|----|----|-------------------|----|-------------------|----|----|----|----|--|--|--|-----|-----|-----------|------|------|------|-------|-------|------|-------|--|-------|------|------|--|-----|------|-------|------|-------|-------|-----|--|--|--|--|------|------|
| 1                                                                                                                                                                                                                                                                                                                                                                                                                                                                                                                                                                                                                                                                                                                                                                                                                                                                                                                                                                                                                                                                                                                                                                                                                                                                                                                                                                                                                                                                                                                                                                                                                                                                                                                                                                                                                                                                                                                                                                                                                                                                                                                                                                                                                                                                                                                                                                                                                                                                                                                                                                                             | 19.13  | 81.2    | 10      | 6/25             | (G) D D/S/L/I/Y P I/A/V L/I/D/E/L R (N) | 1819.9148                       | -0.0083                    | -1.8                        | 86308.0/6.00        | HUMAN   | <a href="#">P30163</a> | <a href="#">789</a> | Serine/threonine-protein phosphatase 2A 65 kDa regulatory subunit A alpha isoform - Homo sapiens (Human) |                       |         |                       |         |                       |         |         |         |         |         |          |          |         |         |                       |         |                       |         |                       |         |         |         |         |         |          |          |                         |      |      |      |      |      |      |      |      |      |       |       |      |      |      |      |      |      |      |      |      |      |      |      |       |      |                       |      |      |      |      |       |       |      |      |      |       |       |      |      |       |      |       |      |       |       |      |      |      |      |        |       |       |      |      |      |      |      |      |      |       |      |      |      |       |      |      |      |      |      |       |      |      |       |       |       |      |      |          |    |   |    |    |                     |    |    |       |                     |    |    |    |    |                   |    |                   |    |    |    |    |  |  |  |     |     |           |      |      |      |       |       |      |       |  |       |      |      |  |     |      |       |      |       |       |     |  |  |  |  |      |      |
| 1                                                                                                                                                                                                                                                                                                                                                                                                                                                                                                                                                                                                                                                                                                                                                                                                                                                                                                                                                                                                                                                                                                                                                                                                                                                                                                                                                                                                                                                                                                                                                                                                                                                                                                                                                                                                                                                                                                                                                                                                                                                                                                                                                                                                                                                                                                                                                                                                                                                                                                                                                                                             | 19.13  | 81.2    | 10      | 6/25             | (G) D D/S/L/I/Y P I/A/V L/I/D/E/L R (N) | 1819.9148                       | -0.0083                    | -1.8                        | 86213.8/4.84        | HUMAN   | <a href="#">P30164</a> | <a href="#">803</a> | Serine/threonine-protein phosphatase 2A 65 kDa regulatory subunit A beta isoform - Homo sapiens (Human)  |                       |         |                       |         |                       |         |         |         |         |         |          |          |         |         |                       |         |                       |         |                       |         |         |         |         |         |          |          |                         |      |      |      |      |      |      |      |      |      |       |       |      |      |      |      |      |      |      |      |      |      |      |      |       |      |                       |      |      |      |      |       |       |      |      |      |       |       |      |      |       |      |       |      |       |       |      |      |      |      |        |       |       |      |      |      |      |      |      |      |       |      |      |      |       |      |      |      |      |      |       |      |      |       |       |       |      |      |          |    |   |    |    |                     |    |    |       |                     |    |    |    |    |                   |    |                   |    |    |    |    |  |  |  |     |     |           |      |      |      |       |       |      |       |  |       |      |      |  |     |      |       |      |       |       |     |  |  |  |  |      |      |
| <table border="1"> <thead> <tr> <th>Fragment-Ion (m/z)</th> <th>88.097</th> <th>198.078</th> <th>288.201</th> <th>318.062</th> <th>388.074</th> <th>406.091</th> <th>417.241</th> <th>473.168</th> <th>484.324</th> <th>601.186</th> <th>619.178</th> <th>628.238</th> <th>632.274</th> <th>688.842<sup>+2</sup></th> <th>845.343</th> <th>851.375<sup>+2</sup></th> <th>882.231</th> <th>758.443<sup>+2</sup></th> <th>857.496</th> <th>828.563</th> <th>932.274</th> <th>968.888</th> <th>874.672</th> <th>1138.876</th> <th>1301.741</th> </tr> </thead> <tbody> <tr> <td>Frag. Inten. (% of TIC)</td> <td>0.12</td> <td>0.05</td> <td>1.17</td> <td>1.16</td> <td>5.81</td> <td>5.89</td> <td>0.97</td> <td>1.50</td> <td>1.25</td> <td>13.33</td> <td>11.45</td> <td>1.04</td> <td>0.98</td> <td>3.28</td> <td>2.50</td> <td>5.01</td> <td>2.17</td> <td>2.79</td> <td>2.74</td> <td>2.16</td> <td>1.08</td> <td>1.17</td> <td>1.09</td> <td>25.46</td> <td>4.71</td> </tr> <tr> <td>Rel. Inten. (% of BP)</td> <td>0.46</td> <td>0.20</td> <td>4.59</td> <td>4.57</td> <td>26.76</td> <td>23.15</td> <td>3.82</td> <td>6.29</td> <td>4.91</td> <td>52.38</td> <td>44.98</td> <td>4.09</td> <td>3.84</td> <td>12.90</td> <td>9.81</td> <td>19.67</td> <td>8.54</td> <td>10.96</td> <td>10.78</td> <td>8.50</td> <td>4.26</td> <td>4.58</td> <td>4.28</td> <td>100.00</td> <td>18.50</td> </tr> <tr> <td>Score</td> <td>0.22</td> <td>1.00</td> <td>1.50</td> <td>0.50</td> <td>0.25</td> <td>0.50</td> <td>1.50</td> <td>-0.06</td> <td>0.75</td> <td>0.25</td> <td>0.50</td> <td>-0.04</td> <td>1.50</td> <td>1.50</td> <td>1.50</td> <td>0.50</td> <td>0.50</td> <td>-0.11</td> <td>1.50</td> <td>1.50</td> <td>-0.04</td> <td>-0.04</td> <td>-0.04</td> <td>1.50</td> <td>1.50</td> </tr> <tr> <td>Ion-type</td> <td>LI</td> <td>Y</td> <td>y2</td> <td>b2</td> <td>b3-H<sub>2</sub>O</td> <td>b3</td> <td>y3</td> <td>PIAVL</td> <td>b4-H<sub>2</sub>O</td> <td>b4</td> <td>b4</td> <td>y4</td> <td>y4</td> <td>y10<sup>+2</sup></td> <td>y5</td> <td>y11<sup>+2</sup></td> <td>b5</td> <td>y7</td> <td>y7</td> <td>y8</td> <td></td> <td></td> <td></td> <td>y10</td> <td>y11</td> </tr> <tr> <td>Delta ppm</td> <td>12.5</td> <td>19.9</td> <td>-6.6</td> <td>-27.1</td> <td>-20.1</td> <td>-4.9</td> <td>-10.8</td> <td></td> <td>-22.2</td> <td>-2.9</td> <td>-2.2</td> <td></td> <td>2.0</td> <td>-4.8</td> <td>-21.3</td> <td>-3.6</td> <td>-12.7</td> <td>-16.9</td> <td>7.9</td> <td></td> <td></td> <td></td> <td></td> <td>-7.1</td> <td>-4.0</td> </tr> </tbody> </table> |        |         |         |                  |                                         |                                 |                            |                             |                     |         |                        |                     |                                                                                                          | Fragment-Ion (m/z)    | 88.097  | 198.078               | 288.201 | 318.062               | 388.074 | 406.091 | 417.241 | 473.168 | 484.324 | 601.186  | 619.178  | 628.238 | 632.274 | 688.842 <sup>+2</sup> | 845.343 | 851.375 <sup>+2</sup> | 882.231 | 758.443 <sup>+2</sup> | 857.496 | 828.563 | 932.274 | 968.888 | 874.672 | 1138.876 | 1301.741 | Frag. Inten. (% of TIC) | 0.12 | 0.05 | 1.17 | 1.16 | 5.81 | 5.89 | 0.97 | 1.50 | 1.25 | 13.33 | 11.45 | 1.04 | 0.98 | 3.28 | 2.50 | 5.01 | 2.17 | 2.79 | 2.74 | 2.16 | 1.08 | 1.17 | 1.09 | 25.46 | 4.71 | Rel. Inten. (% of BP) | 0.46 | 0.20 | 4.59 | 4.57 | 26.76 | 23.15 | 3.82 | 6.29 | 4.91 | 52.38 | 44.98 | 4.09 | 3.84 | 12.90 | 9.81 | 19.67 | 8.54 | 10.96 | 10.78 | 8.50 | 4.26 | 4.58 | 4.28 | 100.00 | 18.50 | Score | 0.22 | 1.00 | 1.50 | 0.50 | 0.25 | 0.50 | 1.50 | -0.06 | 0.75 | 0.25 | 0.50 | -0.04 | 1.50 | 1.50 | 1.50 | 0.50 | 0.50 | -0.11 | 1.50 | 1.50 | -0.04 | -0.04 | -0.04 | 1.50 | 1.50 | Ion-type | LI | Y | y2 | b2 | b3-H <sub>2</sub> O | b3 | y3 | PIAVL | b4-H <sub>2</sub> O | b4 | b4 | y4 | y4 | y10 <sup>+2</sup> | y5 | y11 <sup>+2</sup> | b5 | y7 | y7 | y8 |  |  |  | y10 | y11 | Delta ppm | 12.5 | 19.9 | -6.6 | -27.1 | -20.1 | -4.9 | -10.8 |  | -22.2 | -2.9 | -2.2 |  | 2.0 | -4.8 | -21.3 | -3.6 | -12.7 | -16.9 | 7.9 |  |  |  |  | -7.1 | -4.0 |
| Fragment-Ion (m/z)                                                                                                                                                                                                                                                                                                                                                                                                                                                                                                                                                                                                                                                                                                                                                                                                                                                                                                                                                                                                                                                                                                                                                                                                                                                                                                                                                                                                                                                                                                                                                                                                                                                                                                                                                                                                                                                                                                                                                                                                                                                                                                                                                                                                                                                                                                                                                                                                                                                                                                                                                                            | 88.097 | 198.078 | 288.201 | 318.062          | 388.074                                 | 406.091                         | 417.241                    | 473.168                     | 484.324             | 601.186 | 619.178                | 628.238             | 632.274                                                                                                  | 688.842 <sup>+2</sup> | 845.343 | 851.375 <sup>+2</sup> | 882.231 | 758.443 <sup>+2</sup> | 857.496 | 828.563 | 932.274 | 968.888 | 874.672 | 1138.876 | 1301.741 |         |         |                       |         |                       |         |                       |         |         |         |         |         |          |          |                         |      |      |      |      |      |      |      |      |      |       |       |      |      |      |      |      |      |      |      |      |      |      |      |       |      |                       |      |      |      |      |       |       |      |      |      |       |       |      |      |       |      |       |      |       |       |      |      |      |      |        |       |       |      |      |      |      |      |      |      |       |      |      |      |       |      |      |      |      |      |       |      |      |       |       |       |      |      |          |    |   |    |    |                     |    |    |       |                     |    |    |    |    |                   |    |                   |    |    |    |    |  |  |  |     |     |           |      |      |      |       |       |      |       |  |       |      |      |  |     |      |       |      |       |       |     |  |  |  |  |      |      |
| Frag. Inten. (% of TIC)                                                                                                                                                                                                                                                                                                                                                                                                                                                                                                                                                                                                                                                                                                                                                                                                                                                                                                                                                                                                                                                                                                                                                                                                                                                                                                                                                                                                                                                                                                                                                                                                                                                                                                                                                                                                                                                                                                                                                                                                                                                                                                                                                                                                                                                                                                                                                                                                                                                                                                                                                                       | 0.12   | 0.05    | 1.17    | 1.16             | 5.81                                    | 5.89                            | 0.97                       | 1.50                        | 1.25                | 13.33   | 11.45                  | 1.04                | 0.98                                                                                                     | 3.28                  | 2.50    | 5.01                  | 2.17    | 2.79                  | 2.74    | 2.16    | 1.08    | 1.17    | 1.09    | 25.46    | 4.71     |         |         |                       |         |                       |         |                       |         |         |         |         |         |          |          |                         |      |      |      |      |      |      |      |      |      |       |       |      |      |      |      |      |      |      |      |      |      |      |      |       |      |                       |      |      |      |      |       |       |      |      |      |       |       |      |      |       |      |       |      |       |       |      |      |      |      |        |       |       |      |      |      |      |      |      |      |       |      |      |      |       |      |      |      |      |      |       |      |      |       |       |       |      |      |          |    |   |    |    |                     |    |    |       |                     |    |    |    |    |                   |    |                   |    |    |    |    |  |  |  |     |     |           |      |      |      |       |       |      |       |  |       |      |      |  |     |      |       |      |       |       |     |  |  |  |  |      |      |
| Rel. Inten. (% of BP)                                                                                                                                                                                                                                                                                                                                                                                                                                                                                                                                                                                                                                                                                                                                                                                                                                                                                                                                                                                                                                                                                                                                                                                                                                                                                                                                                                                                                                                                                                                                                                                                                                                                                                                                                                                                                                                                                                                                                                                                                                                                                                                                                                                                                                                                                                                                                                                                                                                                                                                                                                         | 0.46   | 0.20    | 4.59    | 4.57             | 26.76                                   | 23.15                           | 3.82                       | 6.29                        | 4.91                | 52.38   | 44.98                  | 4.09                | 3.84                                                                                                     | 12.90                 | 9.81    | 19.67                 | 8.54    | 10.96                 | 10.78   | 8.50    | 4.26    | 4.58    | 4.28    | 100.00   | 18.50    |         |         |                       |         |                       |         |                       |         |         |         |         |         |          |          |                         |      |      |      |      |      |      |      |      |      |       |       |      |      |      |      |      |      |      |      |      |      |      |      |       |      |                       |      |      |      |      |       |       |      |      |      |       |       |      |      |       |      |       |      |       |       |      |      |      |      |        |       |       |      |      |      |      |      |      |      |       |      |      |      |       |      |      |      |      |      |       |      |      |       |       |       |      |      |          |    |   |    |    |                     |    |    |       |                     |    |    |    |    |                   |    |                   |    |    |    |    |  |  |  |     |     |           |      |      |      |       |       |      |       |  |       |      |      |  |     |      |       |      |       |       |     |  |  |  |  |      |      |
| Score                                                                                                                                                                                                                                                                                                                                                                                                                                                                                                                                                                                                                                                                                                                                                                                                                                                                                                                                                                                                                                                                                                                                                                                                                                                                                                                                                                                                                                                                                                                                                                                                                                                                                                                                                                                                                                                                                                                                                                                                                                                                                                                                                                                                                                                                                                                                                                                                                                                                                                                                                                                         | 0.22   | 1.00    | 1.50    | 0.50             | 0.25                                    | 0.50                            | 1.50                       | -0.06                       | 0.75                | 0.25    | 0.50                   | -0.04               | 1.50                                                                                                     | 1.50                  | 1.50    | 0.50                  | 0.50    | -0.11                 | 1.50    | 1.50    | -0.04   | -0.04   | -0.04   | 1.50     | 1.50     |         |         |                       |         |                       |         |                       |         |         |         |         |         |          |          |                         |      |      |      |      |      |      |      |      |      |       |       |      |      |      |      |      |      |      |      |      |      |      |      |       |      |                       |      |      |      |      |       |       |      |      |      |       |       |      |      |       |      |       |      |       |       |      |      |      |      |        |       |       |      |      |      |      |      |      |      |       |      |      |      |       |      |      |      |      |      |       |      |      |       |       |       |      |      |          |    |   |    |    |                     |    |    |       |                     |    |    |    |    |                   |    |                   |    |    |    |    |  |  |  |     |     |           |      |      |      |       |       |      |       |  |       |      |      |  |     |      |       |      |       |       |     |  |  |  |  |      |      |
| Ion-type                                                                                                                                                                                                                                                                                                                                                                                                                                                                                                                                                                                                                                                                                                                                                                                                                                                                                                                                                                                                                                                                                                                                                                                                                                                                                                                                                                                                                                                                                                                                                                                                                                                                                                                                                                                                                                                                                                                                                                                                                                                                                                                                                                                                                                                                                                                                                                                                                                                                                                                                                                                      | LI     | Y       | y2      | b2               | b3-H <sub>2</sub> O                     | b3                              | y3                         | PIAVL                       | b4-H <sub>2</sub> O | b4      | b4                     | y4                  | y4                                                                                                       | y10 <sup>+2</sup>     | y5      | y11 <sup>+2</sup>     | b5      | y7                    | y7      | y8      |         |         |         | y10      | y11      |         |         |                       |         |                       |         |                       |         |         |         |         |         |          |          |                         |      |      |      |      |      |      |      |      |      |       |       |      |      |      |      |      |      |      |      |      |      |      |      |       |      |                       |      |      |      |      |       |       |      |      |      |       |       |      |      |       |      |       |      |       |       |      |      |      |      |        |       |       |      |      |      |      |      |      |      |       |      |      |      |       |      |      |      |      |      |       |      |      |       |       |       |      |      |          |    |   |    |    |                     |    |    |       |                     |    |    |    |    |                   |    |                   |    |    |    |    |  |  |  |     |     |           |      |      |      |       |       |      |       |  |       |      |      |  |     |      |       |      |       |       |     |  |  |  |  |      |      |
| Delta ppm                                                                                                                                                                                                                                                                                                                                                                                                                                                                                                                                                                                                                                                                                                                                                                                                                                                                                                                                                                                                                                                                                                                                                                                                                                                                                                                                                                                                                                                                                                                                                                                                                                                                                                                                                                                                                                                                                                                                                                                                                                                                                                                                                                                                                                                                                                                                                                                                                                                                                                                                                                                     | 12.5   | 19.9    | -6.6    | -27.1            | -20.1                                   | -4.9                            | -10.8                      |                             | -22.2               | -2.9    | -2.2                   |                     | 2.0                                                                                                      | -4.8                  | -21.3   | -3.6                  | -12.7   | -16.9                 | 7.9     |         |         |         |         | -7.1     | -4.0     |         |         |                       |         |                       |         |                       |         |         |         |         |         |          |          |                         |      |      |      |      |      |      |      |      |      |       |       |      |      |      |      |      |      |      |      |      |      |      |      |       |      |                       |      |      |      |      |       |       |      |      |      |       |       |      |      |       |      |       |      |       |       |      |      |      |      |        |       |       |      |      |      |      |      |      |      |       |      |      |      |       |      |      |      |      |      |       |      |      |       |       |       |      |      |          |    |   |    |    |                     |    |    |       |                     |    |    |    |    |                   |    |                   |    |    |    |    |  |  |  |     |     |           |      |      |      |       |       |      |       |  |       |      |      |  |     |      |       |      |       |       |     |  |  |  |  |      |      |

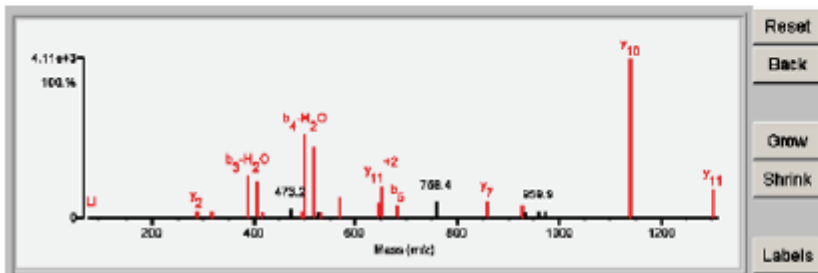

# C15

## Detailed Results

| Rank                    | Score  | SPI (%) | BCS    | # Unmatched Ions | Sequence                                             | MH <sup>+</sup> Calculated (Da) | MH <sup>+</sup> Error (Da) | MH <sup>+</sup> Error (ppm) | Protein MW/Pl (Da) | Species | Accession #            | MS-Digest Index #      | Protein Name                                               |         |         |                       |         |                       |         |                       |                       |         |         |         |          |
|-------------------------|--------|---------|--------|------------------|------------------------------------------------------|---------------------------------|----------------------------|-----------------------------|--------------------|---------|------------------------|------------------------|------------------------------------------------------------|---------|---------|-----------------------|---------|-----------------------|---------|-----------------------|-----------------------|---------|---------|---------|----------|
| 1                       | 20.87  | 94.7    | 10     | 2/25             | (G) I A \A V I T I P T V P V B \N \V G S Q M T R (Q) | 1840.9660                       | 0.0089                     | 4.8                         | 53501.39.19        | HUMAN   | <a href="#">P26368</a> | <a href="#">673699</a> | Splicing factor U2AF 65 kDa subunit - Homo sapiens (Human) |         |         |                       |         |                       |         |                       |                       |         |         |         |          |
| Fragment-Ion (m/z)      | 70.066 | 72.081  | 74.060 | 86.097           | 143.117                                              | 169.134                         | 171.116                    | 174.093                     | 175.115            | 197.129 | 199.109                | 202.088                | 273.126                                                    | 372.194 | 473.245 | 487.765 <sup>+2</sup> | 496.280 | 520.214 <sup>+2</sup> | 679.320 | 684.859 <sup>+2</sup> | 735.398 <sup>+2</sup> | 778.391 | 877.455 | 974.506 | 1170.641 |
| Frac. Inten. (% of TIC) | 0.01   | 0.36    | 2.68   | 0.22             | 2.20                                                 | 7.73                            | 3.22                       | 3.35                        | 3.22               | 5.00    | 3.88                   | 5.23                   | 8.89                                                       | 4.81    | 2.95    | 5.58                  | 2.85    | 2.64                  | 7.03    | 2.08                  | 4.82                  | 6.87    | 2.39    | 9.66    | 2.73     |
| Rel. Inten. (% of BP)   | 0.12   | 3.64    | 27.78  | 2.23             | 22.73                                                | 80.09                           | 33.31                      | 34.70                       | 33.36              | 51.77   | 40.20                  | 54.20                  | 89.97                                                      | 49.80   | 30.50   | 57.78                 | 27.48   | 27.34                 | 72.78   | 21.67                 | 49.95                 | 71.19   | 24.80   | 100.00  | 28.27    |
| Score                   | 0.20   | 0.50    | -0.28  | 0.22             | 0.50                                                 | 0.50                            | 0.75                       | 0.60                        | 1.50               | 0.75    | 0.75                   | 0.50                   | 0.75                                                       | 0.75    | 0.50    | 1.50                  | 0.75    | -0.27                 | 1.50    | 1.50                  | 1.50                  | 1.50    | 1.50    | 1.50    | 1.50     |
| Ion-type                | PR     | V       |        | LI               | AV-28                                                | PV-28                           | AV                         | a1                          | y1                 | PV      | TP                     | b1                     | b2                                                         | b3      | b4      | y9 <sup>+2</sup>      | TPTPV   |                       | y6      | y13 <sup>+2</sup>     | y14 <sup>+2</sup>     | y7      | y8      | y9      | y11      |
| Delta ppm               | 5.3    | 1.7     |        | 6.7              | -13.9                                                | -4.9                            | 11.7                       | -18.4                       | -20.3              | -0.8    | -1.1                   | -12.0                  | -5.6                                                       | -7.1    | 2.1     | 14.1                  | 4.5     |                       | 0.6     | -13.9                 | 7.1                   | 4.2     | -1.3    | -2.4    | 9.6      |

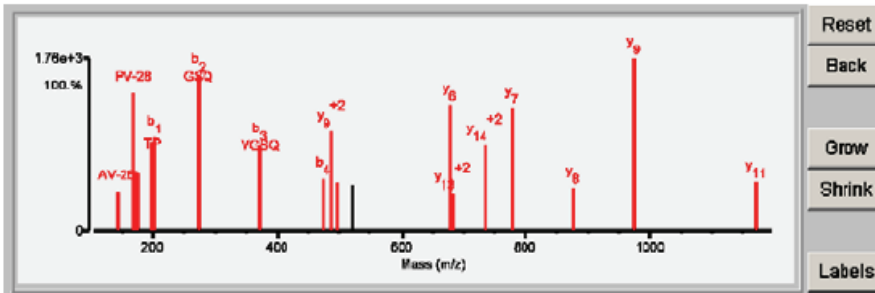

# C16

## Detailed Results

| Rank                    | Score   | SPI (%) | BCS     | # Unmatched Ions | Sequence                                          | MH <sup>+</sup> Calculated (Da) | MH <sup>+</sup> Error (Da) | MH <sup>+</sup> Error (ppm) | Protein MW/Pl (Da) | Species | Accession #            | MS-Digest Index #      | Protein Name                       |                       |                       |                       |                       |         |         |         |         |          |          |          |          |
|-------------------------|---------|---------|---------|------------------|---------------------------------------------------|---------------------------------|----------------------------|-----------------------------|--------------------|---------|------------------------|------------------------|------------------------------------|-----------------------|-----------------------|-----------------------|-----------------------|---------|---------|---------|---------|----------|----------|----------|----------|
| 1                       | 19.28   | 81.0    | 10      | 8/25             | (8) I I E I A H V I E / S / S E V Y N V I S R (A) | 1886.7798                       | -0.0012                    | -0.7                        | 51842.115.48       | HUMAN   | <a href="#">Q88Y82</a> | <a href="#">611383</a> | Syntaxin-12 - Homo sapiens (Human) |                       |                       |                       |                       |         |         |         |         |          |          |          |          |
| Fragment-Ion (m/z)      | 102.066 | 176.117 | 202.088 | 279.132          | 304.164                                           | 316.132                         | 331.136                    | 402.189                     | 487.874            | 616.212 | 640.287                | 682.708 <sup>+2</sup>  | 615.273                            | 832.248 <sup>+2</sup> | 842.802 <sup>+2</sup> | 878.326 <sup>+2</sup> | 888.317 <sup>+2</sup> | 742.863 | 743.368 | 865.424 | 842.484 | 1071.483 | 1170.674 | 1284.804 | 1382.584 |
| Frac. Inten. (% of TIC) | 0.07    | 2.56    | 3.11    | 2.67             | 2.53                                              | 2.88                            | 6.26                       | 6.32                        | 2.42               | 4.16    | 3.95                   | 3.62                   | 5.88                               | 2.91                  | 4.36                  | 5.21                  | 3.25                  | 4.57    | 4.17    | 3.06    | 5.64    | 9.57     | 4.53     | 4.16     | 2.14     |
| Rel. Inten. (% of BP)   | 0.71    | 25.78   | 32.44   | 27.86            | 26.41                                             | 30.08                           | 65.37                      | 66.01                       | 25.29              | 43.47   | 41.30                  | 37.82                  | 61.37                              | 30.35                 | 45.46                 | 54.47                 | 33.97                 | 47.75   | 43.57   | 31.98   | 58.90   | 100.00   | 47.33    | 43.44    | 22.41    |
| Score                   | 1.00    | 1.50    | 0.50    | -0.28            | 1.50                                              | 0.75                            | 0.50                       | 0.50                        | -0.25              | 0.50    | 1.50                   | -0.38                  | 0.50                               | -0.30                 | 1.50                  | 1.50                  | -0.34                 | 1.50    | -0.44   | 1.50    | 1.50    | 1.50     | 1.50     | 1.50     | 0.50     |
| Ion-type                | E       | y1      | b1      |                  | y2                                                | EAN                             | b2                         | b3                          | b4                 | y4      |                        |                        | b5                                 | y11 <sup>+2</sup>     | y12 <sup>+2</sup>     |                       |                       | y11     |         | y7      | y8      | y9       | y10      | y11      | b12      |
| Delta ppm               | 2.4     | -13.4   | -22.4   |                  | -23.2                                             | 3.5                             | 6.0                        | -2.6                        |                    | -3.2    | 14.9                   |                        | -13.6                              |                       | -15.1                 |                       |                       | 0.9     |         | -8.9    | -0.0    | -12.8    | -0.6     | -11.0    | -30.9    |

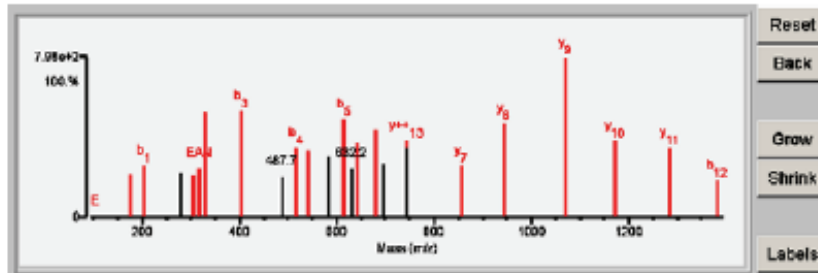

# C17

## Detailed Results

| Rank                    | Score  | SP1 (%) | BCS     | # Unmatched Ions | Sequence                                                    | MH <sup>+</sup> Calculated (Da) | MH <sup>+</sup> Error (Da) | MH <sup>+</sup> Error (ppm) | Protein MWpl (Da) | Species | Accession #           | MS-Digest Index #     | Protein Name                      |                       |                       |                       |                       |                       |                       |                        |                        |                        |                        |                        |                        |
|-------------------------|--------|---------|---------|------------------|-------------------------------------------------------------|---------------------------------|----------------------------|-----------------------------|-------------------|---------|-----------------------|-----------------------|-----------------------------------|-----------------------|-----------------------|-----------------------|-----------------------|-----------------------|-----------------------|------------------------|------------------------|------------------------|------------------------|------------------------|------------------------|
| 1                       | 23.97  | 100.0   | 10      | 0/25             | (S) I (E) A (H) Y (E) R (A) E (V) N Y Q Q A R Q Q L L R (A) | 2485.1838                       | 0.0173                     | 7.0                         | 28015.705.41      | HUMAN   | O15400                | 611483                | Syntaxin-7 - Homo sapiens (Human) |                       |                       |                       |                       |                       |                       |                        |                        |                        |                        |                        |                        |
| Fragment-Ion (m/z)      | 86.086 | 102.054 | 174.083 | 202.088          | 207.119                                                     | 315.133                         | 331.133                    | 402.170                     | 516.212           | 615.283 | 664.685 <sup>+2</sup> | 704.378 <sup>+2</sup> | 755.378 <sup>+3</sup>             | 768.880 <sup>+2</sup> | 804.418 <sup>+2</sup> | 861.445 <sup>+2</sup> | 916.964 <sup>+2</sup> | 925.958 <sup>+2</sup> | 976.493 <sup>+2</sup> | 1024.009 <sup>+2</sup> | 1032.522 <sup>+2</sup> | 1059.518 <sup>+2</sup> | 1068.037 <sup>+2</sup> | 1123.508 <sup>+2</sup> | 1132.544 <sup>+2</sup> |
| Frac. Inten. (% of TIC) | 0.06   | 0.07    | 4.67    | 3.65             | 1.03                                                        | 2.52                            | 7.72                       | 3.97                        | 2.97              | 2.48    | 1.89                  | 1.76                  | 1.09                              | 2.71                  | 2.58                  | 6.22                  | 4.07                  | 19.88                 | 7.88                  | 2.43                   | 9.39                   | 3.01                   | 4.80                   | 1.87                   | 1.49                   |
| Rel. Inten. (% of BP)   | 0.31   | 0.35    | 23.71   | 18.47            | 5.25                                                        | 12.82                           | 39.22                      | 20.19                       | 15.10             | 13.82   | 8.59                  | 9.03                  | 5.55                              | 13.79                 | 13.11                 | 31.60                 | 20.67                 | 100.00                | 39.96                 | 12.33                  | 47.70                  | 15.32                  | 24.41                  | 9.51                   | 7.57                   |
| Score                   | 0.22   | 1.00    | 0.50    | 0.50             | 0.75                                                        | 0.50                            | 0.50                       | 0.50                        | 1.50              | 0.50    | 1.50                  | 1.50                  | 1.50                              | 1.50                  | 1.50                  | 0.50                  | 1.50                  | 1.50                  | 1.50                  | 0.50                   | 1.50                   | 0.50                   | 1.50                   | 0.50                   | 1.50                   |
| Ion-type                | L1     | E       | a1      | b1               | NAE-H2O                                                     | NAE                             | b2                         | b3                          | b4                | b5      | y1 <sup>+2</sup>      | y1 <sup>+2</sup>      | y20 <sup>+3</sup>                 | y13 <sup>+2</sup>     | y14 <sup>+2</sup>     | y15 <sup>+2</sup>     | y16-H2O <sup>+2</sup> | y16 <sup>+2</sup>     | y17 <sup>+2</sup>     | y18-NH3 <sup>+2</sup>  | y18 <sup>+2</sup>      | y19-NH3 <sup>+2</sup>  | y19 <sup>+2</sup>      | y20-H2O <sup>+2</sup>  | y20 <sup>+2</sup>      |
| Delta ppm               | -0.3   | -6.4    | -15.6   | -7.0             | -4.5                                                        | 6.6                             | -0.7                       | -0.3                        | -2.0              | 1.5     | 19.4                  | 2.7                   | 4.9                               | -11.8                 | 2.6                   | 9.1                   | 0.8                   | 6.2                   | 0.2                   | 7.8                    | 7.6                    | -1.4                   | 3.3                    | -38.2                  | -8.9                   |

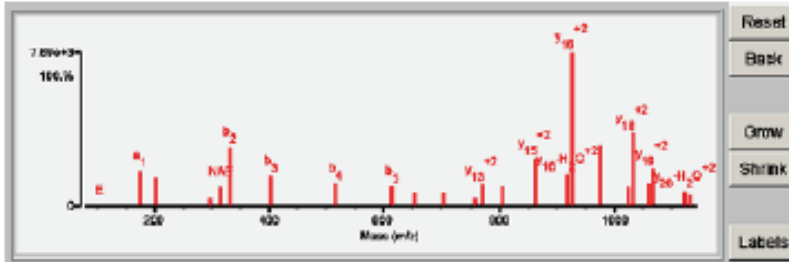

# C18

## Detailed Results

| Rank                    | Score  | SP1 (%) | BCS    | # Unmatched Ions | Sequence                                      | MH <sup>+</sup> Calculated (Da) | MH <sup>+</sup> Error (Da) | MH <sup>+</sup> Error (ppm) | Protein MWpl (Da) | Species | Accession # | MS-Digest Index # | Protein Name                      |         |         |         |                       |         |         |         |         |         |         |         |         |
|-------------------------|--------|---------|--------|------------------|-----------------------------------------------|---------------------------------|----------------------------|-----------------------------|-------------------|---------|-------------|-------------------|-----------------------------------|---------|---------|---------|-----------------------|---------|---------|---------|---------|---------|---------|---------|---------|
| 1                       | 15.32  | 85.8    | 8      | 9/25             | (A) G L I D I A I L I S / S / I I / S / R (Q) | 1218.8361                       | -0.0018                    | -1.5                        | 28906.814.81      | HUMAN   | Q8UNK0      | 611487            | Syntaxin-6 - Homo sapiens (Human) |         |         |         |                       |         |         |         |         |         |         |         |         |
| Fragment-Ion (m/z)      | 72.081 | 86.087  | 84.088 | 102.063          | 120.082                                       | 138.076                         | 168.088                    | 176.114                     | 228.117           | 268.108 | 282.148     | 298.171           | 300.168                           | 374.138 | 376.160 | 446.175 | 478.705 <sup>+2</sup> | 488.322 | 568.268 | 576.348 | 644.380 | 662.382 | 776.483 | 848.612 | 861.633 |
| Frac. Inten. (% of TIC) | 3.05   | 0.45    | 1.46   | 1.21             | 1.85                                          | 1.18                            | 1.30                       | 1.42                        | 3.68              | 5.26    | 2.76        | 1.00              | 1.87                              | 12.13   | 2.27    | 13.41   | 1.10                  | 1.08    | 4.57    | 5.13    | 1.79    | 15.93   | 10.54   | 2.82    | 2.76    |
| Rel. Inten. (% of BP)   | 19.12  | 2.82    | 9.15   | 7.59             | 11.62                                         | 7.39                            | 8.13                       | 8.94                        | 23.12             | 33.02   | 17.34       | 6.28              | 11.75                             | 76.17   | 14.23   | 84.19   | 6.90                  | 6.80    | 28.70   | 32.21   | 11.22   | 100.00  | 66.18   | 17.69   | 17.34   |
| Score                   | -0.19  | 0.22    | -0.09  | -0.08            | -0.12                                         | -0.07                           | -0.08                      | 1.50                        | 0.75              | 0.50    | 1.50        | -0.06             | 0.75                              | 0.50    | -0.14   | 0.50    | 0.50                  | -0.07   | 1.50    | 0.50    | 1.50    | 0.50    | 1.50    | 1.50    | 1.50    |
| Ion-type                | L1     | E       | a1     | b1               | b2                                            | b3                              | b4                         | b5                          | y1                | LD      | b2          | y2                | DAL                               | b3      | b4      | y4      | b5                    | y4      | b5      | y5      | y5-H2O  | y5      | y6      | y6      | y6      |
| Delta ppm               |        | 3.2     |        |                  |                                               |                                 |                            | -26.6                       | -10.8             | -13.5   | -9.8        |                   | -1.3                              | -3.3    |         | -2.6    |                       | 5.5     | -3.1    | -8.2    | 12.3    | -1.2    | -4.8    | 8.7     | 1.4     |

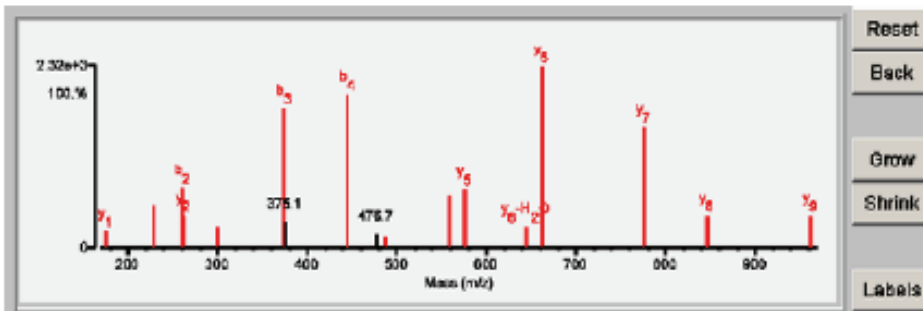

# C19

## Detailed Results

| Rank | Score | SP1 (%) | BC8 | # Unmatched Ions | Sequence                          | MH <sup>+</sup> Calculated (Da) | MH <sup>+</sup> Error (Da) | MH <sup>+</sup> Error (ppm) | Protein MW/pi (Da) | Species | Accession # | M8-Digest Index # | Protein Name                                                    |
|------|-------|---------|-----|------------------|-----------------------------------|---------------------------------|----------------------------|-----------------------------|--------------------|---------|-------------|-------------------|-----------------------------------------------------------------|
| 1    | 18.46 | 80.8    | 12  | 6/25             | (Q) QIQVTVVTVVTEVFP L/D/L I/R (L) | 1844.8068                       | 0.0081                     | 4.4                         | 11846.5/4.68       | HUMAN   | P82310      | 315433            | U5 snRNA-associated Sm-like protein LSM3 - Homo sapiens (Human) |

  

| Fragment-Ion (m/z)      | 176.118 | 217.084 | 346.124 | 401.292 | 448.172 | 611.201 | 618.317 | 629.210 | 632.211 | 726.462 | 744.298 | 762.312               | 806.918 <sup>+2</sup> | 814.921 <sup>+2</sup> | 845.374 | 856.485 | 866.485 <sup>+2</sup> | 881.381 | 881.831 <sup>+2</sup> | 884.640 | 1063.806 | 1068.483 | 1184.956 | 1288.893 | 1388.738 |
|-------------------------|---------|---------|---------|---------|---------|---------|---------|---------|---------|---------|---------|-----------------------|-----------------------|-----------------------|---------|---------|-----------------------|---------|-----------------------|---------|----------|----------|----------|----------|----------|
| Frac. Inten. (% of TIC) | 4.65    | 3.84    | 2.81    | 1.93    | 3.43    | 1.58    | 1.52    | 5.40    | 1.88    | 11.67   | 4.58    | 5.34                  | 3.56                  | 3.60                  | 8.29    | 3.27    | 2.67                  | 1.50    | 1.55                  | 10.55   | 4.07     | 1.60     | 2.58     | 4.28     | 2.33     |
| Rel. Inten. (% of BP)   | 39.85   | 32.91   | 24.10   | 16.52   | 29.42   | 14.39   | 15.46   | 54.83   | 16.13   | 100.00  | 39.29   | 45.76                 | 30.55                 | 30.82                 | 71.07   | 28.06   | 22.91                 | 12.89   | 13.28                 | 90.42   | 34.89    | 13.70    | 22.13    | 36.56    | 19.98    |
| Score                   | 1.50    | 0.50    | 0.50    | 1.50    | 0.50    | -0.14   | 1.50    | 0.25    | -0.16   | 1.50    | 0.25    | 0.50                  | 0.50                  | 1.50                  | 0.25    | 1.50    | -0.23                 | 0.50    | -0.13                 | 1.50    | 1.50     | -0.14    | 1.50     | 1.50     | 1.50     |
| Ion-type                | y1      | b1      | b2      | y5      | b9      |         | y4      | b4+H2O  | y8      | b5+H2O  | b6      | y14+H2O <sup>+2</sup> | y14 <sup>+2</sup>     | b7+H2O                | y7      |         |                       | b7      |                       |         |          |          |          | y10      | y11      |
| Delta ppm               | -5.4    | -4.3    | 0.2     | 11.3    | 0.9     |         | 6.5     | 2.8     |         | 2.3     | -0.7    | 3.4                   | -5.2                  | -8.8                  | 8.0     | 1.5     |                       | 3.1     |                       |         | 6.7      | 1.7      | 5.7      | -1.7     | -5.1     |

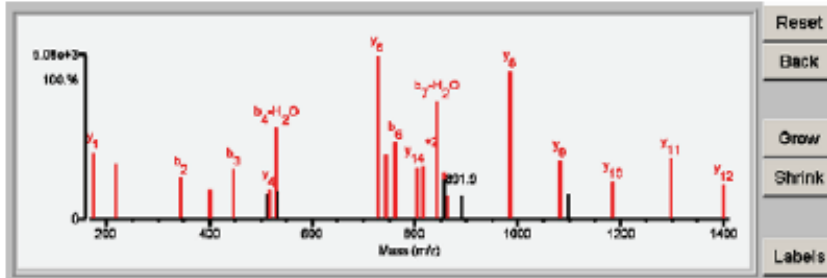

# C20

## Detailed Results

| Rank | Score | SP1 (%) | BC8 | # Unmatched Ions | Sequence                          | MH <sup>+</sup> Calculated (Da) | MH <sup>+</sup> Error (Da) | MH <sup>+</sup> Error (ppm) | Protein MW/pi (Da) | Species | Accession # | M8-Digest Index # | Protein Name                                            |
|------|-------|---------|-----|------------------|-----------------------------------|---------------------------------|----------------------------|-----------------------------|--------------------|---------|-------------|-------------------|---------------------------------------------------------|
| 1    | 10.83 | 71.6    | 3   | 11/26            | (A) S G T V V P S L C T E A R (A) | 1938.8028                       | 0.0246                     | 18.3                        | 14288.2/11.48      | HUMAN   | Q98N11      | 788226            | Uncharacterized protein FLJ30774 - Homo sapiens (Human) |

  

| Fragment-Ion (m/z)      | 70.086 | 72.081 | 74.080 | 88.086 | 168.182 | 187.127 | 232.138 | 236.107 | 238.109 | 283.101 | 284.106 | 300.185 | 318.144 | 345.221 | 384.148 | 478.241 <sup>+2</sup> | 488.247 | 628.785 <sup>+2</sup> | 638.770 <sup>+2</sup> | 675.311 | 678.367 | 778.388 | 878.433 | 876.485 | 1078.682 |
|-------------------------|--------|--------|--------|--------|---------|---------|---------|---------|---------|---------|---------|---------|---------|---------|---------|-----------------------|---------|-----------------------|-----------------------|---------|---------|---------|---------|---------|----------|
| Frac. Inten. (% of TIC) | 0.00   | 0.03   | 1.08   | 0.02   | 2.30    | 1.68    | 0.75    | 7.49    | 0.98    | 5.60    | 0.89    | 1.08    | 2.67    | 1.33    | 4.68    | 0.89                  | 22.06   | 6.87                  | 7.53                  | 0.98    | 1.68    | 6.75    | 2.08    | 15.03   | 1.58     |
| Rel. Inten. (% of BP)   | 0.01   | 0.12   | 4.88   | 0.10   | 10.42   | 7.60    | 3.39    | 33.97   | 4.45    | 29.91   | 4.03    | 4.88    | 12.10   | 6.03    | 21.21   | 4.04                  | 100.00  | 31.14                 | 34.12                 | 4.42    | 7.60    | 30.58   | 9.43    | 81.73   | 7.17     |
| Score                   | 0.20   | 0.50   | -0.05  | 0.22   | 0.50    | 0.75    | -0.03   | -0.34   | -0.04   | -0.30   | -0.04   | 0.50    | 0.75    | -0.06   | -0.21   | 0.50                  | 1.50    | 0.50                  | 1.50                  | -0.04   | -0.08   | 1.50    | -0.09   | 1.50    | 1.50     |
| Ion-type                | PR     | V      | V      | L1     | VP-2S   | VP      |         |         |         |         |         | LCT+H2O | LCT     |         |         | y5+H2O <sup>+2</sup>  | y**9    | y10+H2O <sup>+2</sup> | y10 <sup>+2</sup>     |         |         |         | y7      | y9      | y10      |
| Delta ppm               | -4.6   | -1.0   |        | -6.1   | -16.2   | -15.0   |         |         |         |         |         | -12.4   | -17.3   |         |         | -7.2                  | -5.4    | -7.0                  | -6.5                  |         |         | -7.1    | -7.9    | -8.2    |          |

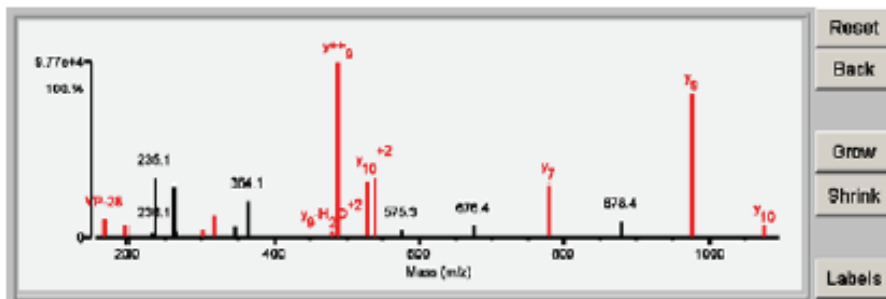

# C21

## Detailed Results

| Rank | Score | SP1 (%) | BCS | # Unmatched Ions | Sequence                                    | MH <sup>+</sup> Calculated (Da) | MH <sup>+</sup> Error (Da) | MH <sup>+</sup> Error (ppm) | Protein MW(pI) (Da) | Species | Accession #   | M8-Digest Index #                                                                     | Protein Name |         |         |         |         |         |         |         |         |         |         |                       |                       |         |         |         |         |          |       |
|------|-------|---------|-----|------------------|---------------------------------------------|---------------------------------|----------------------------|-----------------------------|---------------------|---------|---------------|---------------------------------------------------------------------------------------|--------------|---------|---------|---------|---------|---------|---------|---------|---------|---------|---------|-----------------------|-----------------------|---------|---------|---------|---------|----------|-------|
| 1    | 18.70 | 88.1    | 10  | 4/25             | (Q) I Q V S E I I I E R I L G E I Q / R (D) | 1680.7674                       | -0.0008                    | -0.6                        | 28888.818.02        | HUMAN   | Q8UEU0 701451 | Vesicle transport through interaction with t-SNAREs homolog 1B - Homo sapiens (Human) |              |         |         |         |         |         |         |         |         |         |         |                       |                       |         |         |         |         |          |       |
|      |       |         |     |                  | Fragment-Ion (m/z)                          | 86.088                          | 174.093                    | 176.117                     | 189.070             | 259.111 | 288.146       | 303.178                                                                               | 328.132      | 432.220 | 467.173 | 476.182 | 488.238 | 688.289 | 802.324 | 829.318 | 867.288 | 701.364 | 731.390 | 734.363 <sup>+2</sup> | 764.382 <sup>+2</sup> | 830.388 | 880.404 | 868.441 | 873.488 | 1086.678 |       |
|      |       |         |     |                  | Frag. Inten. (% of TIC)                     | 0.14                            | 1.61                       | 2.06                        | 1.80                | 1.54    | 1.68          | 2.88                                                                                  | 3.31         | 4.46    | 7.52    | 7.15    | 100.00  | 8.44    | 3.83    | 1.93    | 1.95    | 4.53    | 3.28    | 1.87                  | 1.89                  | 2.14    | 7.49    | 2.94    | 8.60    | 3.83     |       |
|      |       |         |     |                  | Rel. Inten. (% of BP)                       | 1.03                            | 12.09                      | 15.48                       | 11.99               | 11.58   | 12.60         | 21.64                                                                                 | 24.90        | 33.50   | 59.49   | 53.81   | 63.38   | 28.79   | 14.48   | 11.75   | 34.00   | 11.75   | 34.00   | 24.62                 | 14.03                 | 14.21   | 16.06   | 56.30   | 22.07   | 64.60    | 28.79 |
|      |       |         |     |                  | Score                                       | 0.22                            | 0.50                       | 1.50                        | -0.12               | 0.50    | 0.50          | 1.50                                                                                  | 0.25         | 1.50    | 0.50    | 1.50    | 0.50    | 1.50    | 0.50    | 1.50    | 0.75    | 0.75    | -0.12   | 1.50                  | -0.14                 | -0.14   | 0.50    | 1.50    | 0.50    | 1.50     | 1.50  |
|      |       |         |     |                  | Ion-type                                    | L1                              | a1                         | y1                          | b2                  | y2      | b2-H2O        | y2                                                                                    | b3-H2O       | y3      | b4-H2O  | y4      | b5      | y5      | b6      | y6      | b6      | y6      | b7      | y7                    | b7                    | y7      | b8      | y8      | b8      | y8       |       |
|      |       |         |     |                  | Delta ppm                                   | 18.3                            | -17.9                      | -8.5                        | -3.8                | -3.8    | -18.5         | -5.7                                                                                  | -5.6         | 0.6     | -6.2    | -10.1   | -7.3    | -2.3    | -2.9    | 5.3     | 5.3     | -1.6    | -12.0   | -10.6                 | -7.5                  | 1.2     | -6.3    | -2.5    |         |          |       |

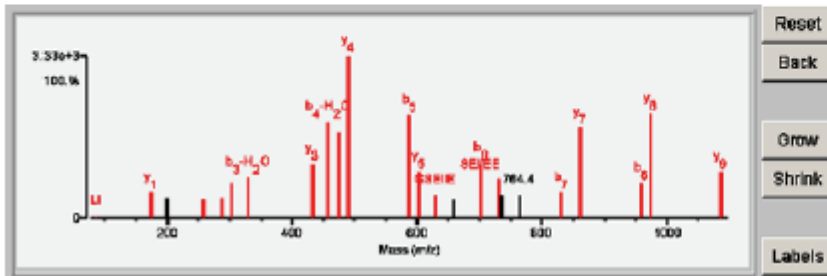

# C22

## Detailed Results

| Rank | Score | SP1 (%) | BCS | # Unmatched Ions | Sequence                                        | MH <sup>+</sup> Calculated (Da) | MH <sup>+</sup> Error (Da) | MH <sup>+</sup> Error (ppm) | Protein MW(pI) (Da) | Species | Accession #   | M8-Digest Index #               | Protein Name |         |         |         |         |         |         |                       |         |         |         |          |          |          |          |          |          |          |       |
|------|-------|---------|-----|------------------|-------------------------------------------------|---------------------------------|----------------------------|-----------------------------|---------------------|---------|---------------|---------------------------------|--------------|---------|---------|---------|---------|---------|---------|-----------------------|---------|---------|---------|----------|----------|----------|----------|----------|----------|----------|-------|
| 1    | 14.00 | 77.3    | 10  | 8/26             | (F) S L A A D V A I S R / T I E T K I R / R (T) | 1802.8200                       | 0.0148                     | 8.3                         | 63951.916.08        | HUMAN   | P08870 888231 | Vimentin - Homo sapiens (Human) |              |         |         |         |         |         |         |                       |         |         |         |          |          |          |          |          |          |          |       |
|      |       |         |     |                  | Fragment-Ion (m/z)                              | 86.087                          | 271.111                    | 276.168                     | 288.121             | 300.167 | 380.180       | 380.209                         | 476.187      | 548.224 | 658.312 | 707.329 | 800.380 | 834.988 | 836.378 | 846.388 <sup>+2</sup> | 874.388 | 828.418 | 837.411 | 1030.480 | 1034.488 | 1051.481 | 1144.624 | 1184.662 | 1257.800 | 1360.680 |       |
|      |       |         |     |                  | Frag. Inten. (% of TIC)                         | 0.17                            | 3.34                       | 1.84                        | 5.45                | 4.38    | 5.15          | 4.92                            | 8.07         | 18.57   | 5.39    | 2.54    | 1.80    | 1.65    | 2.76    | 4.02                  | 2.63    | 1.58    | 2.17    | 2.52     | 2.44     | 5.69     | 6.52     | 2.14     | 2.44     | 1.79     |       |
|      |       |         |     |                  | Rel. Inten. (% of BP)                           | 0.92                            | 17.99                      | 9.90                        | 29.34               | 23.57   | 27.81         | 26.48                           | 43.47        | 100.00  | 29.02   | 13.70   | 9.71    | 8.95    | 14.89   | 21.67                 | 14.19   | 8.49    | 11.56   | 13.57    | 13.14    | 30.64    | 35.09    | 11.54    | 13.14    | 9.65     |       |
|      |       |         |     |                  | Score                                           | 0.22                            | 0.25                       | 1.50                        | 0.50                | 0.75    | 0.50          | 1.50                            | 0.50         | 0.50    | 0.50    | 1.50    | 0.50    | 1.50    | -0.09   | -0.15                 | -0.22   | 0.50    | 1.50    | -0.12    | 1.50     | -0.13    | -0.31    | 1.50     | -0.12    | 1.50     | -0.10 |
|      |       |         |     |                  | Ion-type                                        | L1                              | b2-H2O                     | y2                          | b2                  | b4      | b5            | y5                              | b4           | b5      | b6      | b++11   | y5      | y5      | b6      | y6                    | b6      | y6      | y7      | y7       | y7       | y8       | y8       | y9       | y9       |          |       |
|      |       |         |     |                  | Delta ppm                                       | 6.7                             | -3.6                       | 4.2                         | -7.4                | 0.7     | 0.1           | -1.7                            | 0.4          | 0.7     | 5.3     | 23.1    | 3.5     | 3.5     | -3.2    | -11.5                 | 12.1    | -3.2    | -11.5   | 12.1     | 3.4      | 3.4      | 3.4      | -3.3     |          |          |       |

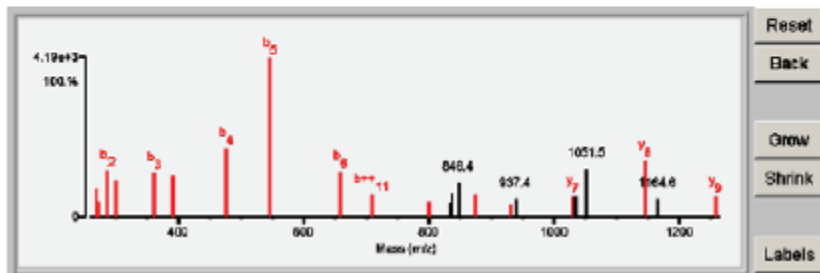

Detailed Results

| Rank                                                                                                                                                                                                                                                                                                                                                                                                                                                                                                                                                                                                                                                                                                                                                                                                                                                                                                                                                                                                                                                                                                                                                                                                                                                                                                                                                                                                                                                                                                                                                                                                                                                                                                                                                                                                                                                                                                                                                                                                                                                                                                                                                                                                                                                                                                                                                                                                                                                                                                    | Score  | SP1 (%) | BCS    | # Unmodified ions | Sequence                                | MH <sup>+</sup> Calculated (Da) | MH <sup>+</sup> Error (Da) | MH <sup>+</sup> Error (ppm) | Protein MW(pI) (Da) | Species | Accession # | MS-Digest Index # | Protein Name                    |                       |         |         |         |                       |         |         |                       |         |         |          |          |         |         |                       |         |         |         |                       |         |         |                       |         |         |          |          |                         |      |      |      |      |      |      |      |      |      |       |      |      |      |      |      |      |      |      |      |      |      |      |       |      |      |                       |      |      |      |      |      |      |       |      |      |       |      |       |      |      |      |       |      |      |      |      |      |      |        |      |      |       |      |       |      |      |       |       |      |       |       |      |      |      |       |       |      |       |      |       |      |      |       |      |      |       |       |          |   |    |    |    |    |    |    |    |        |    |     |    |    |    |    |    |     |        |    |    |    |    |    |    |    |           |      |  |     |     |  |  |      |  |  |     |     |     |  |  |     |  |      |  |      |      |  |     |     |  |  |
|---------------------------------------------------------------------------------------------------------------------------------------------------------------------------------------------------------------------------------------------------------------------------------------------------------------------------------------------------------------------------------------------------------------------------------------------------------------------------------------------------------------------------------------------------------------------------------------------------------------------------------------------------------------------------------------------------------------------------------------------------------------------------------------------------------------------------------------------------------------------------------------------------------------------------------------------------------------------------------------------------------------------------------------------------------------------------------------------------------------------------------------------------------------------------------------------------------------------------------------------------------------------------------------------------------------------------------------------------------------------------------------------------------------------------------------------------------------------------------------------------------------------------------------------------------------------------------------------------------------------------------------------------------------------------------------------------------------------------------------------------------------------------------------------------------------------------------------------------------------------------------------------------------------------------------------------------------------------------------------------------------------------------------------------------------------------------------------------------------------------------------------------------------------------------------------------------------------------------------------------------------------------------------------------------------------------------------------------------------------------------------------------------------------------------------------------------------------------------------------------------------|--------|---------|--------|-------------------|-----------------------------------------|---------------------------------|----------------------------|-----------------------------|---------------------|---------|-------------|-------------------|---------------------------------|-----------------------|---------|---------|---------|-----------------------|---------|---------|-----------------------|---------|---------|----------|----------|---------|---------|-----------------------|---------|---------|---------|-----------------------|---------|---------|-----------------------|---------|---------|----------|----------|-------------------------|------|------|------|------|------|------|------|------|------|-------|------|------|------|------|------|------|------|------|------|------|------|------|-------|------|------|-----------------------|------|------|------|------|------|------|-------|------|------|-------|------|-------|------|------|------|-------|------|------|------|------|------|------|--------|------|------|-------|------|-------|------|------|-------|-------|------|-------|-------|------|------|------|-------|-------|------|-------|------|-------|------|------|-------|------|------|-------|-------|----------|---|----|----|----|----|----|----|----|--------|----|-----|----|----|----|----|----|-----|--------|----|----|----|----|----|----|----|-----------|------|--|-----|-----|--|--|------|--|--|-----|-----|-----|--|--|-----|--|------|--|------|------|--|-----|-----|--|--|
| 1                                                                                                                                                                                                                                                                                                                                                                                                                                                                                                                                                                                                                                                                                                                                                                                                                                                                                                                                                                                                                                                                                                                                                                                                                                                                                                                                                                                                                                                                                                                                                                                                                                                                                                                                                                                                                                                                                                                                                                                                                                                                                                                                                                                                                                                                                                                                                                                                                                                                                                       | 12.05  | 73.1    | 7      | 12/26             | (V) D V S I K R / D / L / T A A L R (D) | 1608.7238                       | 0.0073                     | 4.9                         | 69861.916.08        | HUMAN   | P08670      | 898231            | Vimentin - Homo sapiens (Human) |                       |         |         |         |                       |         |         |                       |         |         |          |          |         |         |                       |         |         |         |                       |         |         |                       |         |         |          |          |                         |      |      |      |      |      |      |      |      |      |       |      |      |      |      |      |      |      |      |      |      |      |      |       |      |      |                       |      |      |      |      |      |      |       |      |      |       |      |       |      |      |      |       |      |      |      |      |      |      |        |      |      |       |      |       |      |      |       |       |      |       |       |      |      |      |       |       |      |       |      |       |      |      |       |      |      |       |       |          |   |    |    |    |    |    |    |    |        |    |     |    |    |    |    |    |     |        |    |    |    |    |    |    |    |           |      |  |     |     |  |  |      |  |  |     |     |     |  |  |     |  |      |  |      |      |  |     |     |  |  |
| <table border="1"> <thead> <tr> <th>Fragment-Ion (m/z)</th> <th>72.082</th> <th>84.081</th> <th>88.087</th> <th>175.118</th> <th>219.098</th> <th>240.081</th> <th>303.102</th> <th>330.138</th> <th>338.148</th> <th>372.124</th> <th>380.134</th> <th>428.760</th> <th>429.251</th> <th>613.776<sup>+2</sup></th> <th>631.326</th> <th>642.176</th> <th>680.301</th> <th>806.830<sup>+2</sup></th> <th>836.232</th> <th>844.408</th> <th>887.380<sup>+2</sup></th> <th>768.438</th> <th>868.488</th> <th>1028.638</th> <th>1113.670</th> </tr> </thead> <tbody> <tr> <td>Freq. Inten. (% of TIC)</td> <td>0.18</td> <td>1.75</td> <td>0.03</td> <td>0.75</td> <td>1.84</td> <td>1.89</td> <td>5.75</td> <td>2.17</td> <td>0.94</td> <td>11.03</td> <td>2.74</td> <td>4.81</td> <td>2.96</td> <td>2.18</td> <td>1.42</td> <td>7.27</td> <td>1.02</td> <td>0.88</td> <td>2.94</td> <td>1.37</td> <td>1.40</td> <td>0.76</td> <td>40.30</td> <td>1.41</td> <td>2.24</td> </tr> <tr> <td>Rel. Inten. (% of BP)</td> <td>0.45</td> <td>4.33</td> <td>0.07</td> <td>1.86</td> <td>4.57</td> <td>4.68</td> <td>14.28</td> <td>5.38</td> <td>2.33</td> <td>27.37</td> <td>5.80</td> <td>11.94</td> <td>7.33</td> <td>5.41</td> <td>3.52</td> <td>18.03</td> <td>2.52</td> <td>2.20</td> <td>7.30</td> <td>3.39</td> <td>3.47</td> <td>1.88</td> <td>100.00</td> <td>3.50</td> <td>5.56</td> </tr> <tr> <td>Score</td> <td>0.50</td> <td>-0.04</td> <td>0.22</td> <td>1.50</td> <td>-0.05</td> <td>-0.05</td> <td>0.50</td> <td>-0.05</td> <td>-0.02</td> <td>0.25</td> <td>0.50</td> <td>1.50</td> <td>-0.07</td> <td>-0.05</td> <td>1.50</td> <td>-0.18</td> <td>1.50</td> <td>-0.02</td> <td>0.25</td> <td>1.50</td> <td>-0.03</td> <td>1.50</td> <td>1.50</td> <td>-0.03</td> <td>-0.06</td> </tr> <tr> <td>Ion-type</td> <td>V</td> <td>LI</td> <td>LI</td> <td>y1</td> <td>b1</td> <td>b2</td> <td>b2</td> <td>b2</td> <td>b3+H2O</td> <td>b3</td> <td>y+8</td> <td>y5</td> <td>y5</td> <td>y5</td> <td>y5</td> <td>y5</td> <td>y+9</td> <td>b4+H2O</td> <td>y6</td> <td>y6</td> <td>y6</td> <td>y7</td> <td>y6</td> <td>y6</td> <td>y6</td> </tr> <tr> <td>Delta ppm</td> <td>10.0</td> <td></td> <td>7.8</td> <td>1.4</td> <td></td> <td></td> <td>-0.7</td> <td></td> <td></td> <td>0.9</td> <td>0.1</td> <td>3.8</td> <td></td> <td></td> <td>0.3</td> <td></td> <td>-2.7</td> <td></td> <td>-1.1</td> <td>-1.8</td> <td></td> <td>2.5</td> <td>0.8</td> <td></td> <td></td> </tr> </tbody> </table> |        |         |        |                   |                                         |                                 |                            |                             |                     |         |             |                   |                                 | Fragment-Ion (m/z)    | 72.082  | 84.081  | 88.087  | 175.118               | 219.098 | 240.081 | 303.102               | 330.138 | 338.148 | 372.124  | 380.134  | 428.760 | 429.251 | 613.776 <sup>+2</sup> | 631.326 | 642.176 | 680.301 | 806.830 <sup>+2</sup> | 836.232 | 844.408 | 887.380 <sup>+2</sup> | 768.438 | 868.488 | 1028.638 | 1113.670 | Freq. Inten. (% of TIC) | 0.18 | 1.75 | 0.03 | 0.75 | 1.84 | 1.89 | 5.75 | 2.17 | 0.94 | 11.03 | 2.74 | 4.81 | 2.96 | 2.18 | 1.42 | 7.27 | 1.02 | 0.88 | 2.94 | 1.37 | 1.40 | 0.76 | 40.30 | 1.41 | 2.24 | Rel. Inten. (% of BP) | 0.45 | 4.33 | 0.07 | 1.86 | 4.57 | 4.68 | 14.28 | 5.38 | 2.33 | 27.37 | 5.80 | 11.94 | 7.33 | 5.41 | 3.52 | 18.03 | 2.52 | 2.20 | 7.30 | 3.39 | 3.47 | 1.88 | 100.00 | 3.50 | 5.56 | Score | 0.50 | -0.04 | 0.22 | 1.50 | -0.05 | -0.05 | 0.50 | -0.05 | -0.02 | 0.25 | 0.50 | 1.50 | -0.07 | -0.05 | 1.50 | -0.18 | 1.50 | -0.02 | 0.25 | 1.50 | -0.03 | 1.50 | 1.50 | -0.03 | -0.06 | Ion-type | V | LI | LI | y1 | b1 | b2 | b2 | b2 | b3+H2O | b3 | y+8 | y5 | y5 | y5 | y5 | y5 | y+9 | b4+H2O | y6 | y6 | y6 | y7 | y6 | y6 | y6 | Delta ppm | 10.0 |  | 7.8 | 1.4 |  |  | -0.7 |  |  | 0.9 | 0.1 | 3.8 |  |  | 0.3 |  | -2.7 |  | -1.1 | -1.8 |  | 2.5 | 0.8 |  |  |
| Fragment-Ion (m/z)                                                                                                                                                                                                                                                                                                                                                                                                                                                                                                                                                                                                                                                                                                                                                                                                                                                                                                                                                                                                                                                                                                                                                                                                                                                                                                                                                                                                                                                                                                                                                                                                                                                                                                                                                                                                                                                                                                                                                                                                                                                                                                                                                                                                                                                                                                                                                                                                                                                                                      | 72.082 | 84.081  | 88.087 | 175.118           | 219.098                                 | 240.081                         | 303.102                    | 330.138                     | 338.148             | 372.124 | 380.134     | 428.760           | 429.251                         | 613.776 <sup>+2</sup> | 631.326 | 642.176 | 680.301 | 806.830 <sup>+2</sup> | 836.232 | 844.408 | 887.380 <sup>+2</sup> | 768.438 | 868.488 | 1028.638 | 1113.670 |         |         |                       |         |         |         |                       |         |         |                       |         |         |          |          |                         |      |      |      |      |      |      |      |      |      |       |      |      |      |      |      |      |      |      |      |      |      |      |       |      |      |                       |      |      |      |      |      |      |       |      |      |       |      |       |      |      |      |       |      |      |      |      |      |      |        |      |      |       |      |       |      |      |       |       |      |       |       |      |      |      |       |       |      |       |      |       |      |      |       |      |      |       |       |          |   |    |    |    |    |    |    |    |        |    |     |    |    |    |    |    |     |        |    |    |    |    |    |    |    |           |      |  |     |     |  |  |      |  |  |     |     |     |  |  |     |  |      |  |      |      |  |     |     |  |  |
| Freq. Inten. (% of TIC)                                                                                                                                                                                                                                                                                                                                                                                                                                                                                                                                                                                                                                                                                                                                                                                                                                                                                                                                                                                                                                                                                                                                                                                                                                                                                                                                                                                                                                                                                                                                                                                                                                                                                                                                                                                                                                                                                                                                                                                                                                                                                                                                                                                                                                                                                                                                                                                                                                                                                 | 0.18   | 1.75    | 0.03   | 0.75              | 1.84                                    | 1.89                            | 5.75                       | 2.17                        | 0.94                | 11.03   | 2.74        | 4.81              | 2.96                            | 2.18                  | 1.42    | 7.27    | 1.02    | 0.88                  | 2.94    | 1.37    | 1.40                  | 0.76    | 40.30   | 1.41     | 2.24     |         |         |                       |         |         |         |                       |         |         |                       |         |         |          |          |                         |      |      |      |      |      |      |      |      |      |       |      |      |      |      |      |      |      |      |      |      |      |      |       |      |      |                       |      |      |      |      |      |      |       |      |      |       |      |       |      |      |      |       |      |      |      |      |      |      |        |      |      |       |      |       |      |      |       |       |      |       |       |      |      |      |       |       |      |       |      |       |      |      |       |      |      |       |       |          |   |    |    |    |    |    |    |    |        |    |     |    |    |    |    |    |     |        |    |    |    |    |    |    |    |           |      |  |     |     |  |  |      |  |  |     |     |     |  |  |     |  |      |  |      |      |  |     |     |  |  |
| Rel. Inten. (% of BP)                                                                                                                                                                                                                                                                                                                                                                                                                                                                                                                                                                                                                                                                                                                                                                                                                                                                                                                                                                                                                                                                                                                                                                                                                                                                                                                                                                                                                                                                                                                                                                                                                                                                                                                                                                                                                                                                                                                                                                                                                                                                                                                                                                                                                                                                                                                                                                                                                                                                                   | 0.45   | 4.33    | 0.07   | 1.86              | 4.57                                    | 4.68                            | 14.28                      | 5.38                        | 2.33                | 27.37   | 5.80        | 11.94             | 7.33                            | 5.41                  | 3.52    | 18.03   | 2.52    | 2.20                  | 7.30    | 3.39    | 3.47                  | 1.88    | 100.00  | 3.50     | 5.56     |         |         |                       |         |         |         |                       |         |         |                       |         |         |          |          |                         |      |      |      |      |      |      |      |      |      |       |      |      |      |      |      |      |      |      |      |      |      |      |       |      |      |                       |      |      |      |      |      |      |       |      |      |       |      |       |      |      |      |       |      |      |      |      |      |      |        |      |      |       |      |       |      |      |       |       |      |       |       |      |      |      |       |       |      |       |      |       |      |      |       |      |      |       |       |          |   |    |    |    |    |    |    |    |        |    |     |    |    |    |    |    |     |        |    |    |    |    |    |    |    |           |      |  |     |     |  |  |      |  |  |     |     |     |  |  |     |  |      |  |      |      |  |     |     |  |  |
| Score                                                                                                                                                                                                                                                                                                                                                                                                                                                                                                                                                                                                                                                                                                                                                                                                                                                                                                                                                                                                                                                                                                                                                                                                                                                                                                                                                                                                                                                                                                                                                                                                                                                                                                                                                                                                                                                                                                                                                                                                                                                                                                                                                                                                                                                                                                                                                                                                                                                                                                   | 0.50   | -0.04   | 0.22   | 1.50              | -0.05                                   | -0.05                           | 0.50                       | -0.05                       | -0.02               | 0.25    | 0.50        | 1.50              | -0.07                           | -0.05                 | 1.50    | -0.18   | 1.50    | -0.02                 | 0.25    | 1.50    | -0.03                 | 1.50    | 1.50    | -0.03    | -0.06    |         |         |                       |         |         |         |                       |         |         |                       |         |         |          |          |                         |      |      |      |      |      |      |      |      |      |       |      |      |      |      |      |      |      |      |      |      |      |      |       |      |      |                       |      |      |      |      |      |      |       |      |      |       |      |       |      |      |      |       |      |      |      |      |      |      |        |      |      |       |      |       |      |      |       |       |      |       |       |      |      |      |       |       |      |       |      |       |      |      |       |      |      |       |       |          |   |    |    |    |    |    |    |    |        |    |     |    |    |    |    |    |     |        |    |    |    |    |    |    |    |           |      |  |     |     |  |  |      |  |  |     |     |     |  |  |     |  |      |  |      |      |  |     |     |  |  |
| Ion-type                                                                                                                                                                                                                                                                                                                                                                                                                                                                                                                                                                                                                                                                                                                                                                                                                                                                                                                                                                                                                                                                                                                                                                                                                                                                                                                                                                                                                                                                                                                                                                                                                                                                                                                                                                                                                                                                                                                                                                                                                                                                                                                                                                                                                                                                                                                                                                                                                                                                                                | V      | LI      | LI     | y1                | b1                                      | b2                              | b2                         | b2                          | b3+H2O              | b3      | y+8         | y5                | y5                              | y5                    | y5      | y5      | y+9     | b4+H2O                | y6      | y6      | y6                    | y7      | y6      | y6       | y6       |         |         |                       |         |         |         |                       |         |         |                       |         |         |          |          |                         |      |      |      |      |      |      |      |      |      |       |      |      |      |      |      |      |      |      |      |      |      |      |       |      |      |                       |      |      |      |      |      |      |       |      |      |       |      |       |      |      |      |       |      |      |      |      |      |      |        |      |      |       |      |       |      |      |       |       |      |       |       |      |      |      |       |       |      |       |      |       |      |      |       |      |      |       |       |          |   |    |    |    |    |    |    |    |        |    |     |    |    |    |    |    |     |        |    |    |    |    |    |    |    |           |      |  |     |     |  |  |      |  |  |     |     |     |  |  |     |  |      |  |      |      |  |     |     |  |  |
| Delta ppm                                                                                                                                                                                                                                                                                                                                                                                                                                                                                                                                                                                                                                                                                                                                                                                                                                                                                                                                                                                                                                                                                                                                                                                                                                                                                                                                                                                                                                                                                                                                                                                                                                                                                                                                                                                                                                                                                                                                                                                                                                                                                                                                                                                                                                                                                                                                                                                                                                                                                               | 10.0   |         | 7.8    | 1.4               |                                         |                                 | -0.7                       |                             |                     | 0.9     | 0.1         | 3.8               |                                 |                       | 0.3     |         | -2.7    |                       | -1.1    | -1.8    |                       | 2.5     | 0.8     |          |          |         |         |                       |         |         |         |                       |         |         |                       |         |         |          |          |                         |      |      |      |      |      |      |      |      |      |       |      |      |      |      |      |      |      |      |      |      |      |      |       |      |      |                       |      |      |      |      |      |      |       |      |      |       |      |       |      |      |      |       |      |      |      |      |      |      |        |      |      |       |      |       |      |      |       |       |      |       |       |      |      |      |       |       |      |       |      |       |      |      |       |      |      |       |       |          |   |    |    |    |    |    |    |    |        |    |     |    |    |    |    |    |     |        |    |    |    |    |    |    |    |           |      |  |     |     |  |  |      |  |  |     |     |     |  |  |     |  |      |  |      |      |  |     |     |  |  |

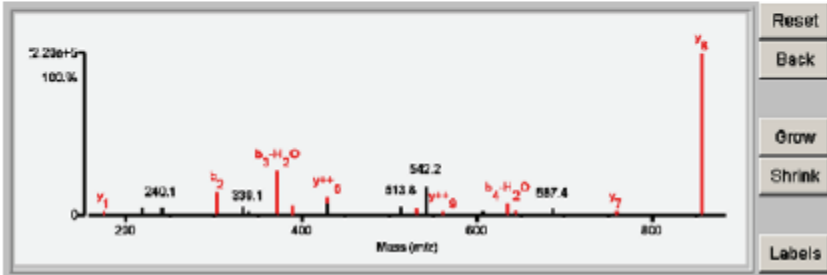

I1

Detailed Results

| Rank                                                                                                                                                                                                                                                                                                                                                                                                                                                                                                                                                                                                                                                                                                                                                                                                                                                                                                                                                                                                                                                                                                                                                                                                                                                                                                                                                                                                                                                                                                                                                                                                                                                                                                                                                                                                                                                                                                                                                                                                                                                                                                                                                                                                                                                                                                                                                                                                                                                        | Score  | SPI (%) | BCS    | # Unmatched ions | Sequence                          | MH <sup>+</sup> Calculated (Da) | MH <sup>+</sup> Error (Da) | MH <sup>+</sup> Error (ppm) | Protein MW (Da) | Species | Accession # | M8-Digest Index # | Protein Name                                                    |                    |         |         |         |         |         |         |         |         |         |         |          |         |                       |         |         |         |         |         |         |         |         |         |         |         |          |                         |      |      |      |      |      |      |      |      |      |      |      |      |      |      |      |      |       |      |      |      |      |       |      |      |      |                       |      |      |      |       |      |      |       |      |      |      |      |      |       |       |      |      |       |      |      |      |      |        |       |       |       |       |       |      |       |       |      |       |       |      |       |       |       |       |      |      |       |      |       |      |      |       |      |      |      |      |       |          |    |    |    |    |   |    |    |    |    |    |    |    |    |    |    |    |    |    |    |    |    |    |    |    |    |           |  |     |  |  |      |  |  |     |  |  |  |  |     |      |  |      |  |     |     |  |       |     |      |      |
|-------------------------------------------------------------------------------------------------------------------------------------------------------------------------------------------------------------------------------------------------------------------------------------------------------------------------------------------------------------------------------------------------------------------------------------------------------------------------------------------------------------------------------------------------------------------------------------------------------------------------------------------------------------------------------------------------------------------------------------------------------------------------------------------------------------------------------------------------------------------------------------------------------------------------------------------------------------------------------------------------------------------------------------------------------------------------------------------------------------------------------------------------------------------------------------------------------------------------------------------------------------------------------------------------------------------------------------------------------------------------------------------------------------------------------------------------------------------------------------------------------------------------------------------------------------------------------------------------------------------------------------------------------------------------------------------------------------------------------------------------------------------------------------------------------------------------------------------------------------------------------------------------------------------------------------------------------------------------------------------------------------------------------------------------------------------------------------------------------------------------------------------------------------------------------------------------------------------------------------------------------------------------------------------------------------------------------------------------------------------------------------------------------------------------------------------------------------|--------|---------|--------|------------------|-----------------------------------|---------------------------------|----------------------------|-----------------------------|-----------------|---------|-------------|-------------------|-----------------------------------------------------------------|--------------------|---------|---------|---------|---------|---------|---------|---------|---------|---------|---------|----------|---------|-----------------------|---------|---------|---------|---------|---------|---------|---------|---------|---------|---------|---------|----------|-------------------------|------|------|------|------|------|------|------|------|------|------|------|------|------|------|------|------|-------|------|------|------|------|-------|------|------|------|-----------------------|------|------|------|-------|------|------|-------|------|------|------|------|------|-------|-------|------|------|-------|------|------|------|------|--------|-------|-------|-------|-------|-------|------|-------|-------|------|-------|-------|------|-------|-------|-------|-------|------|------|-------|------|-------|------|------|-------|------|------|------|------|-------|----------|----|----|----|----|---|----|----|----|----|----|----|----|----|----|----|----|----|----|----|----|----|----|----|----|----|-----------|--|-----|--|--|------|--|--|-----|--|--|--|--|-----|------|--|------|--|-----|-----|--|-------|-----|------|------|
| 1                                                                                                                                                                                                                                                                                                                                                                                                                                                                                                                                                                                                                                                                                                                                                                                                                                                                                                                                                                                                                                                                                                                                                                                                                                                                                                                                                                                                                                                                                                                                                                                                                                                                                                                                                                                                                                                                                                                                                                                                                                                                                                                                                                                                                                                                                                                                                                                                                                                           | 13.07  | 82.8    | 8      | 13/26            | (R) K I P I L P / L / T D / R (V) | 1268.8111                       | 0.0200                     | 16.8                        | 10831.718.88    | HUMAN   | P81804      | 78441             | 10 kDa heat shock protein, mitochondrial - Homo sapiens (Human) |                    |         |         |         |         |         |         |         |         |         |         |          |         |                       |         |         |         |         |         |         |         |         |         |         |         |          |                         |      |      |      |      |      |      |      |      |      |      |      |      |      |      |      |      |       |      |      |      |      |       |      |      |      |                       |      |      |      |       |      |      |       |      |      |      |      |      |       |       |      |      |       |      |      |      |      |        |       |       |       |       |       |      |       |       |      |       |       |      |       |       |       |       |      |      |       |      |       |      |      |       |      |      |      |      |       |          |    |    |    |    |   |    |    |    |    |    |    |    |    |    |    |    |    |    |    |    |    |    |    |    |    |           |  |     |  |  |      |  |  |     |  |  |  |  |     |      |  |      |  |     |     |  |       |     |      |      |
| <table border="1"> <thead> <tr> <th>Fragment-Ion (m/z)</th> <th>84.081</th> <th>86.087</th> <th>88.091</th> <th>84.087</th> <th>120.082</th> <th>121.084</th> <th>171.141</th> <th>176.120</th> <th>223.087</th> <th>231.084</th> <th>233.188</th> <th>259.069</th> <th>324.181<sup>+2</sup></th> <th>362.118</th> <th>380.179</th> <th>380.730</th> <th>408.132</th> <th>437.218</th> <th>488.188</th> <th>518.211</th> <th>550.291</th> <th>847.355</th> <th>780.444</th> <th>807.615</th> <th>1186.583</th> </tr> </thead> <tbody> <tr> <td>Frag. Inten. (% of TIC)</td> <td>1.59</td> <td>0.14</td> <td>1.56</td> <td>4.73</td> <td>0.47</td> <td>1.26</td> <td>3.86</td> <td>2.51</td> <td>1.28</td> <td>0.92</td> <td>1.90</td> <td>1.97</td> <td>7.10</td> <td>3.91</td> <td>1.24</td> <td>1.31</td> <td>11.20</td> <td>1.87</td> <td>2.35</td> <td>2.26</td> <td>1.03</td> <td>32.13</td> <td>3.71</td> <td>6.35</td> <td>3.35</td> </tr> <tr> <td>Rel. Inten. (% of BP)</td> <td>4.94</td> <td>0.44</td> <td>4.86</td> <td>14.71</td> <td>1.47</td> <td>3.91</td> <td>12.01</td> <td>7.81</td> <td>4.00</td> <td>2.87</td> <td>5.90</td> <td>6.14</td> <td>22.08</td> <td>12.18</td> <td>3.84</td> <td>4.08</td> <td>34.87</td> <td>5.82</td> <td>7.30</td> <td>7.04</td> <td>3.19</td> <td>100.00</td> <td>11.54</td> <td>19.78</td> <td>10.43</td> </tr> <tr> <td>Score</td> <td>-0.05</td> <td>0.22</td> <td>-0.05</td> <td>-0.15</td> <td>1.00</td> <td>-0.04</td> <td>-0.12</td> <td>1.50</td> <td>-0.04</td> <td>-0.03</td> <td>-0.05</td> <td>-0.05</td> <td>1.50</td> <td>0.50</td> <td>-0.04</td> <td>1.50</td> <td>-0.35</td> <td>1.50</td> <td>0.50</td> <td>-0.07</td> <td>1.50</td> <td>1.50</td> <td>1.50</td> <td>1.50</td> <td>-0.10</td> </tr> <tr> <td>Ion-type</td> <td>LI</td> <td>LI</td> <td>LI</td> <td>LI</td> <td>F</td> <td>Y1</td> </tr> <tr> <td>Delta ppm</td> <td></td> <td>3.2</td> <td></td> <td></td> <td>11.0</td> <td></td> <td></td> <td>4.3</td> <td></td> <td></td> <td></td> <td></td> <td>6.8</td> <td>-0.5</td> <td></td> <td>22.7</td> <td></td> <td>9.6</td> <td>3.6</td> <td></td> <td>-13.2</td> <td>6.6</td> <td>11.0</td> <td>12.3</td> </tr> </tbody> </table> |        |         |        |                  |                                   |                                 |                            |                             |                 |         |             |                   |                                                                 | Fragment-Ion (m/z) | 84.081  | 86.087  | 88.091  | 84.087  | 120.082 | 121.084 | 171.141 | 176.120 | 223.087 | 231.084 | 233.188  | 259.069 | 324.181 <sup>+2</sup> | 362.118 | 380.179 | 380.730 | 408.132 | 437.218 | 488.188 | 518.211 | 550.291 | 847.355 | 780.444 | 807.615 | 1186.583 | Frag. Inten. (% of TIC) | 1.59 | 0.14 | 1.56 | 4.73 | 0.47 | 1.26 | 3.86 | 2.51 | 1.28 | 0.92 | 1.90 | 1.97 | 7.10 | 3.91 | 1.24 | 1.31 | 11.20 | 1.87 | 2.35 | 2.26 | 1.03 | 32.13 | 3.71 | 6.35 | 3.35 | Rel. Inten. (% of BP) | 4.94 | 0.44 | 4.86 | 14.71 | 1.47 | 3.91 | 12.01 | 7.81 | 4.00 | 2.87 | 5.90 | 6.14 | 22.08 | 12.18 | 3.84 | 4.08 | 34.87 | 5.82 | 7.30 | 7.04 | 3.19 | 100.00 | 11.54 | 19.78 | 10.43 | Score | -0.05 | 0.22 | -0.05 | -0.15 | 1.00 | -0.04 | -0.12 | 1.50 | -0.04 | -0.03 | -0.05 | -0.05 | 1.50 | 0.50 | -0.04 | 1.50 | -0.35 | 1.50 | 0.50 | -0.07 | 1.50 | 1.50 | 1.50 | 1.50 | -0.10 | Ion-type | LI | LI | LI | LI | F | Y1 | Y1 | Y1 | Y1 | Y1 | Y1 | Y1 | Y1 | Y1 | Y1 | Y1 | Y1 | Y1 | Y1 | Y1 | Y1 | Y1 | Y1 | Y1 | Y1 | Delta ppm |  | 3.2 |  |  | 11.0 |  |  | 4.3 |  |  |  |  | 6.8 | -0.5 |  | 22.7 |  | 9.6 | 3.6 |  | -13.2 | 6.6 | 11.0 | 12.3 |
| Fragment-Ion (m/z)                                                                                                                                                                                                                                                                                                                                                                                                                                                                                                                                                                                                                                                                                                                                                                                                                                                                                                                                                                                                                                                                                                                                                                                                                                                                                                                                                                                                                                                                                                                                                                                                                                                                                                                                                                                                                                                                                                                                                                                                                                                                                                                                                                                                                                                                                                                                                                                                                                          | 84.081 | 86.087  | 88.091 | 84.087           | 120.082                           | 121.084                         | 171.141                    | 176.120                     | 223.087         | 231.084 | 233.188     | 259.069           | 324.181 <sup>+2</sup>                                           | 362.118            | 380.179 | 380.730 | 408.132 | 437.218 | 488.188 | 518.211 | 550.291 | 847.355 | 780.444 | 807.615 | 1186.583 |         |                       |         |         |         |         |         |         |         |         |         |         |         |          |                         |      |      |      |      |      |      |      |      |      |      |      |      |      |      |      |      |       |      |      |      |      |       |      |      |      |                       |      |      |      |       |      |      |       |      |      |      |      |      |       |       |      |      |       |      |      |      |      |        |       |       |       |       |       |      |       |       |      |       |       |      |       |       |       |       |      |      |       |      |       |      |      |       |      |      |      |      |       |          |    |    |    |    |   |    |    |    |    |    |    |    |    |    |    |    |    |    |    |    |    |    |    |    |    |           |  |     |  |  |      |  |  |     |  |  |  |  |     |      |  |      |  |     |     |  |       |     |      |      |
| Frag. Inten. (% of TIC)                                                                                                                                                                                                                                                                                                                                                                                                                                                                                                                                                                                                                                                                                                                                                                                                                                                                                                                                                                                                                                                                                                                                                                                                                                                                                                                                                                                                                                                                                                                                                                                                                                                                                                                                                                                                                                                                                                                                                                                                                                                                                                                                                                                                                                                                                                                                                                                                                                     | 1.59   | 0.14    | 1.56   | 4.73             | 0.47                              | 1.26                            | 3.86                       | 2.51                        | 1.28            | 0.92    | 1.90        | 1.97              | 7.10                                                            | 3.91               | 1.24    | 1.31    | 11.20   | 1.87    | 2.35    | 2.26    | 1.03    | 32.13   | 3.71    | 6.35    | 3.35     |         |                       |         |         |         |         |         |         |         |         |         |         |         |          |                         |      |      |      |      |      |      |      |      |      |      |      |      |      |      |      |      |       |      |      |      |      |       |      |      |      |                       |      |      |      |       |      |      |       |      |      |      |      |      |       |       |      |      |       |      |      |      |      |        |       |       |       |       |       |      |       |       |      |       |       |      |       |       |       |       |      |      |       |      |       |      |      |       |      |      |      |      |       |          |    |    |    |    |   |    |    |    |    |    |    |    |    |    |    |    |    |    |    |    |    |    |    |    |    |           |  |     |  |  |      |  |  |     |  |  |  |  |     |      |  |      |  |     |     |  |       |     |      |      |
| Rel. Inten. (% of BP)                                                                                                                                                                                                                                                                                                                                                                                                                                                                                                                                                                                                                                                                                                                                                                                                                                                                                                                                                                                                                                                                                                                                                                                                                                                                                                                                                                                                                                                                                                                                                                                                                                                                                                                                                                                                                                                                                                                                                                                                                                                                                                                                                                                                                                                                                                                                                                                                                                       | 4.94   | 0.44    | 4.86   | 14.71            | 1.47                              | 3.91                            | 12.01                      | 7.81                        | 4.00            | 2.87    | 5.90        | 6.14              | 22.08                                                           | 12.18              | 3.84    | 4.08    | 34.87   | 5.82    | 7.30    | 7.04    | 3.19    | 100.00  | 11.54   | 19.78   | 10.43    |         |                       |         |         |         |         |         |         |         |         |         |         |         |          |                         |      |      |      |      |      |      |      |      |      |      |      |      |      |      |      |      |       |      |      |      |      |       |      |      |      |                       |      |      |      |       |      |      |       |      |      |      |      |      |       |       |      |      |       |      |      |      |      |        |       |       |       |       |       |      |       |       |      |       |       |      |       |       |       |       |      |      |       |      |       |      |      |       |      |      |      |      |       |          |    |    |    |    |   |    |    |    |    |    |    |    |    |    |    |    |    |    |    |    |    |    |    |    |    |           |  |     |  |  |      |  |  |     |  |  |  |  |     |      |  |      |  |     |     |  |       |     |      |      |
| Score                                                                                                                                                                                                                                                                                                                                                                                                                                                                                                                                                                                                                                                                                                                                                                                                                                                                                                                                                                                                                                                                                                                                                                                                                                                                                                                                                                                                                                                                                                                                                                                                                                                                                                                                                                                                                                                                                                                                                                                                                                                                                                                                                                                                                                                                                                                                                                                                                                                       | -0.05  | 0.22    | -0.05  | -0.15            | 1.00                              | -0.04                           | -0.12                      | 1.50                        | -0.04           | -0.03   | -0.05       | -0.05             | 1.50                                                            | 0.50               | -0.04   | 1.50    | -0.35   | 1.50    | 0.50    | -0.07   | 1.50    | 1.50    | 1.50    | 1.50    | -0.10    |         |                       |         |         |         |         |         |         |         |         |         |         |         |          |                         |      |      |      |      |      |      |      |      |      |      |      |      |      |      |      |      |       |      |      |      |      |       |      |      |      |                       |      |      |      |       |      |      |       |      |      |      |      |      |       |       |      |      |       |      |      |      |      |        |       |       |       |       |       |      |       |       |      |       |       |      |       |       |       |       |      |      |       |      |       |      |      |       |      |      |      |      |       |          |    |    |    |    |   |    |    |    |    |    |    |    |    |    |    |    |    |    |    |    |    |    |    |    |    |           |  |     |  |  |      |  |  |     |  |  |  |  |     |      |  |      |  |     |     |  |       |     |      |      |
| Ion-type                                                                                                                                                                                                                                                                                                                                                                                                                                                                                                                                                                                                                                                                                                                                                                                                                                                                                                                                                                                                                                                                                                                                                                                                                                                                                                                                                                                                                                                                                                                                                                                                                                                                                                                                                                                                                                                                                                                                                                                                                                                                                                                                                                                                                                                                                                                                                                                                                                                    | LI     | LI      | LI     | LI               | F                                 | Y1                              | Y1                         | Y1                          | Y1              | Y1      | Y1          | Y1                | Y1                                                              | Y1                 | Y1      | Y1      | Y1      | Y1      | Y1      | Y1      | Y1      | Y1      | Y1      | Y1      | Y1       |         |                       |         |         |         |         |         |         |         |         |         |         |         |          |                         |      |      |      |      |      |      |      |      |      |      |      |      |      |      |      |      |       |      |      |      |      |       |      |      |      |                       |      |      |      |       |      |      |       |      |      |      |      |      |       |       |      |      |       |      |      |      |      |        |       |       |       |       |       |      |       |       |      |       |       |      |       |       |       |       |      |      |       |      |       |      |      |       |      |      |      |      |       |          |    |    |    |    |   |    |    |    |    |    |    |    |    |    |    |    |    |    |    |    |    |    |    |    |    |           |  |     |  |  |      |  |  |     |  |  |  |  |     |      |  |      |  |     |     |  |       |     |      |      |
| Delta ppm                                                                                                                                                                                                                                                                                                                                                                                                                                                                                                                                                                                                                                                                                                                                                                                                                                                                                                                                                                                                                                                                                                                                                                                                                                                                                                                                                                                                                                                                                                                                                                                                                                                                                                                                                                                                                                                                                                                                                                                                                                                                                                                                                                                                                                                                                                                                                                                                                                                   |        | 3.2     |        |                  | 11.0                              |                                 |                            | 4.3                         |                 |         |             |                   | 6.8                                                             | -0.5               |         | 22.7    |         | 9.6     | 3.6     |         | -13.2   | 6.6     | 11.0    | 12.3    |          |         |                       |         |         |         |         |         |         |         |         |         |         |         |          |                         |      |      |      |      |      |      |      |      |      |      |      |      |      |      |      |      |       |      |      |      |      |       |      |      |      |                       |      |      |      |       |      |      |       |      |      |      |      |      |       |       |      |      |       |      |      |      |      |        |       |       |       |       |       |      |       |       |      |       |       |      |       |       |       |       |      |      |       |      |       |      |      |       |      |      |      |      |       |          |    |    |    |    |   |    |    |    |    |    |    |    |    |    |    |    |    |    |    |    |    |    |    |    |    |           |  |     |  |  |      |  |  |     |  |  |  |  |     |      |  |      |  |     |     |  |       |     |      |      |

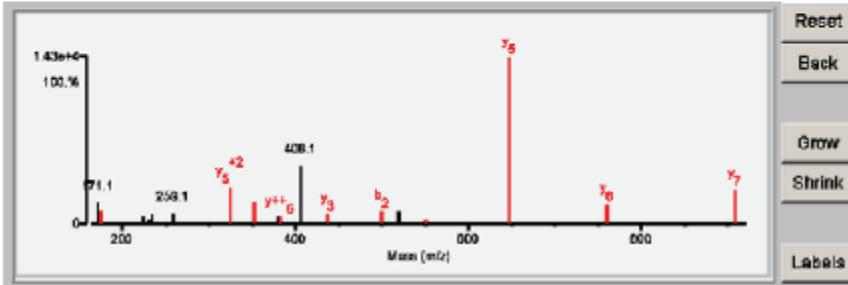

I2

Detailed Results

| Rank                                                                                                                                                                                                                                                                                                                                                                                                                                                                                                                                                                                                                                                                                                                                                                                                                                                                                                                                                                                                                                                                                                                                                                                                                                                                                                                                                                                                                                                                                                                                                                                                                                                                                                                                                                                                                                                                                                                                                                                                                                                                                                                                                                                                                                                                                                                                                                                                                                                                                                                                                 | Score  | SPI (%) | BCS    | # Unmatched ions | Sequence                    | MH <sup>+</sup> Calculated (Da) | MH <sup>+</sup> Error (Da) | MH <sup>+</sup> Error (ppm) | Protein MW (Da) | Species | Accession # | M8-Digest Index # | Protein Name                                                   |                    |                  |                  |                       |                       |         |         |         |         |         |         |         |         |         |         |         |         |                       |                       |         |         |         |         |         |         |         |                         |      |      |      |      |      |      |      |      |      |      |      |      |      |      |      |      |      |      |      |      |      |      |       |      |       |                       |      |       |      |      |       |      |       |       |       |       |       |       |       |       |       |       |       |       |       |       |       |       |        |       |       |       |      |       |      |      |       |      |       |      |      |      |       |      |       |      |       |       |      |      |      |      |      |      |      |      |      |          |    |    |    |     |   |   |    |    |       |    |    |    |    |    |                  |                  |                  |        |    |    |    |    |    |    |    |           |     |  |      |      |  |      |  |     |      |     |  |     |  |      |  |  |       |      |       |       |      |     |       |      |
|------------------------------------------------------------------------------------------------------------------------------------------------------------------------------------------------------------------------------------------------------------------------------------------------------------------------------------------------------------------------------------------------------------------------------------------------------------------------------------------------------------------------------------------------------------------------------------------------------------------------------------------------------------------------------------------------------------------------------------------------------------------------------------------------------------------------------------------------------------------------------------------------------------------------------------------------------------------------------------------------------------------------------------------------------------------------------------------------------------------------------------------------------------------------------------------------------------------------------------------------------------------------------------------------------------------------------------------------------------------------------------------------------------------------------------------------------------------------------------------------------------------------------------------------------------------------------------------------------------------------------------------------------------------------------------------------------------------------------------------------------------------------------------------------------------------------------------------------------------------------------------------------------------------------------------------------------------------------------------------------------------------------------------------------------------------------------------------------------------------------------------------------------------------------------------------------------------------------------------------------------------------------------------------------------------------------------------------------------------------------------------------------------------------------------------------------------------------------------------------------------------------------------------------------------|--------|---------|--------|------------------|-----------------------------|---------------------------------|----------------------------|-----------------------------|-----------------|---------|-------------|-------------------|----------------------------------------------------------------|--------------------|------------------|------------------|-----------------------|-----------------------|---------|---------|---------|---------|---------|---------|---------|---------|---------|---------|---------|---------|-----------------------|-----------------------|---------|---------|---------|---------|---------|---------|---------|-------------------------|------|------|------|------|------|------|------|------|------|------|------|------|------|------|------|------|------|------|------|------|------|------|-------|------|-------|-----------------------|------|-------|------|------|-------|------|-------|-------|-------|-------|-------|-------|-------|-------|-------|-------|-------|-------|-------|-------|-------|-------|--------|-------|-------|-------|------|-------|------|------|-------|------|-------|------|------|------|-------|------|-------|------|-------|-------|------|------|------|------|------|------|------|------|------|----------|----|----|----|-----|---|---|----|----|-------|----|----|----|----|----|------------------|------------------|------------------|--------|----|----|----|----|----|----|----|-----------|-----|--|------|------|--|------|--|-----|------|-----|--|-----|--|------|--|--|-------|------|-------|-------|------|-----|-------|------|
| 1                                                                                                                                                                                                                                                                                                                                                                                                                                                                                                                                                                                                                                                                                                                                                                                                                                                                                                                                                                                                                                                                                                                                                                                                                                                                                                                                                                                                                                                                                                                                                                                                                                                                                                                                                                                                                                                                                                                                                                                                                                                                                                                                                                                                                                                                                                                                                                                                                                                                                                                                                    | 13.48  | 78.8    | 4      | 7/26             | (C) R I G I Y L / Q S R (Y) | 926.4188                        | -0.0088                    | -9.0                        | 28468.718.18    | HUMAN   | P18406      | 582441            | 3-oxo-5-alpha-steroid 4-dehydrogenase 1 - Homo sapiens (Human) |                    |                  |                  |                       |                       |         |         |         |         |         |         |         |         |         |         |         |         |                       |                       |         |         |         |         |         |         |         |                         |      |      |      |      |      |      |      |      |      |      |      |      |      |      |      |      |      |      |      |      |      |      |       |      |       |                       |      |       |      |      |       |      |       |       |       |       |       |       |       |       |       |       |       |       |       |       |       |       |        |       |       |       |      |       |      |      |       |      |       |      |      |      |       |      |       |      |       |       |      |      |      |      |      |      |      |      |      |          |    |    |    |     |   |   |    |    |       |    |    |    |    |    |                  |                  |                  |        |    |    |    |    |    |    |    |           |     |  |      |      |  |      |  |     |      |     |  |     |  |      |  |  |       |      |       |       |      |     |       |      |
| <table border="1"> <thead> <tr> <th>Fragment-Ion (m/z)</th> <th>70.088</th> <th>84.084</th> <th>88.088</th> <th>128.107</th> <th>130.090</th> <th>198.078</th> <th>173.078</th> <th>176.058</th> <th>183.101</th> <th>203.061</th> <th>204.184</th> <th>221.086</th> <th>251.088</th> <th>280.074</th> <th>281.167</th> <th>279.198</th> <th>338.878<sup>+2</sup></th> <th>382.188<sup>+2</sup></th> <th>372.184</th> <th>380.202</th> <th>395.145</th> <th>423.138</th> <th>509.287</th> <th>688.363</th> <th>723.374</th> </tr> </thead> <tbody> <tr> <td>Frag. Inten. (% of TIC)</td> <td>0.00</td> <td>1.68</td> <td>0.07</td> <td>0.07</td> <td>2.04</td> <td>0.60</td> <td>2.84</td> <td>4.40</td> <td>3.35</td> <td>7.32</td> <td>2.01</td> <td>1.74</td> <td>2.54</td> <td>6.86</td> <td>9.14</td> <td>2.98</td> <td>1.90</td> <td>1.93</td> <td>3.11</td> <td>5.82</td> <td>1.88</td> <td>3.49</td> <td>16.46</td> <td>5.33</td> <td>11.43</td> </tr> <tr> <td>Rel. Inten. (% of BP)</td> <td>0.01</td> <td>10.23</td> <td>0.43</td> <td>0.42</td> <td>12.39</td> <td>3.63</td> <td>17.25</td> <td>26.75</td> <td>20.34</td> <td>44.46</td> <td>12.19</td> <td>10.55</td> <td>15.44</td> <td>41.65</td> <td>55.53</td> <td>18.10</td> <td>11.51</td> <td>11.75</td> <td>18.87</td> <td>41.44</td> <td>11.43</td> <td>21.23</td> <td>100.00</td> <td>32.39</td> <td>69.42</td> </tr> <tr> <td>Score</td> <td>0.20</td> <td>-0.10</td> <td>0.22</td> <td>0.20</td> <td>-0.12</td> <td>1.00</td> <td>-0.17</td> <td>0.50</td> <td>0.50</td> <td>0.50</td> <td>-0.12</td> <td>0.75</td> <td>-0.15</td> <td>0.50</td> <td>-0.56</td> <td>-0.18</td> <td>1.50</td> <td>1.50</td> <td>0.50</td> <td>1.50</td> <td>0.50</td> <td>0.50</td> <td>1.50</td> <td>1.50</td> <td>1.50</td> </tr> <tr> <td>Ion-type</td> <td>PR</td> <td>LI</td> <td>LI</td> <td>RKQ</td> <td>Y</td> <td>Y</td> <td>b1</td> <td>b1</td> <td>GY-28</td> <td>b1</td> <td>GY</td> <td>GY</td> <td>b2</td> <td>b2</td> <td>Y5<sup>+2</sup></td> <td>Y5<sup>+2</sup></td> <td>Y5<sup>+2</sup></td> <td>Y3+H2O</td> <td>Y3</td> <td>Y3</td> <td>Y3</td> <td>Y4</td> <td>Y4</td> <td>Y5</td> <td>Y6</td> </tr> <tr> <td>Delta ppm</td> <td>9.5</td> <td></td> <td>24.1</td> <td>38.4</td> <td></td> <td>16.2</td> <td></td> <td>6.4</td> <td>15.3</td> <td>7.0</td> <td></td> <td>8.3</td> <td></td> <td>11.7</td> <td></td> <td></td> <td>-18.3</td> <td>17.3</td> <td>-13.4</td> <td>-19.5</td> <td>15.0</td> <td>8.1</td> <td>-12.6</td> <td>-5.6</td> </tr> </tbody> </table> |        |         |        |                  |                             |                                 |                            |                             |                 |         |             |                   |                                                                | Fragment-Ion (m/z) | 70.088           | 84.084           | 88.088                | 128.107               | 130.090 | 198.078 | 173.078 | 176.058 | 183.101 | 203.061 | 204.184 | 221.086 | 251.088 | 280.074 | 281.167 | 279.198 | 338.878 <sup>+2</sup> | 382.188 <sup>+2</sup> | 372.184 | 380.202 | 395.145 | 423.138 | 509.287 | 688.363 | 723.374 | Frag. Inten. (% of TIC) | 0.00 | 1.68 | 0.07 | 0.07 | 2.04 | 0.60 | 2.84 | 4.40 | 3.35 | 7.32 | 2.01 | 1.74 | 2.54 | 6.86 | 9.14 | 2.98 | 1.90 | 1.93 | 3.11 | 5.82 | 1.88 | 3.49 | 16.46 | 5.33 | 11.43 | Rel. Inten. (% of BP) | 0.01 | 10.23 | 0.43 | 0.42 | 12.39 | 3.63 | 17.25 | 26.75 | 20.34 | 44.46 | 12.19 | 10.55 | 15.44 | 41.65 | 55.53 | 18.10 | 11.51 | 11.75 | 18.87 | 41.44 | 11.43 | 21.23 | 100.00 | 32.39 | 69.42 | Score | 0.20 | -0.10 | 0.22 | 0.20 | -0.12 | 1.00 | -0.17 | 0.50 | 0.50 | 0.50 | -0.12 | 0.75 | -0.15 | 0.50 | -0.56 | -0.18 | 1.50 | 1.50 | 0.50 | 1.50 | 0.50 | 0.50 | 1.50 | 1.50 | 1.50 | Ion-type | PR | LI | LI | RKQ | Y | Y | b1 | b1 | GY-28 | b1 | GY | GY | b2 | b2 | Y5 <sup>+2</sup> | Y5 <sup>+2</sup> | Y5 <sup>+2</sup> | Y3+H2O | Y3 | Y3 | Y3 | Y4 | Y4 | Y5 | Y6 | Delta ppm | 9.5 |  | 24.1 | 38.4 |  | 16.2 |  | 6.4 | 15.3 | 7.0 |  | 8.3 |  | 11.7 |  |  | -18.3 | 17.3 | -13.4 | -19.5 | 15.0 | 8.1 | -12.6 | -5.6 |
| Fragment-Ion (m/z)                                                                                                                                                                                                                                                                                                                                                                                                                                                                                                                                                                                                                                                                                                                                                                                                                                                                                                                                                                                                                                                                                                                                                                                                                                                                                                                                                                                                                                                                                                                                                                                                                                                                                                                                                                                                                                                                                                                                                                                                                                                                                                                                                                                                                                                                                                                                                                                                                                                                                                                                   | 70.088 | 84.084  | 88.088 | 128.107          | 130.090                     | 198.078                         | 173.078                    | 176.058                     | 183.101         | 203.061 | 204.184     | 221.086           | 251.088                                                        | 280.074            | 281.167          | 279.198          | 338.878 <sup>+2</sup> | 382.188 <sup>+2</sup> | 372.184 | 380.202 | 395.145 | 423.138 | 509.287 | 688.363 | 723.374 |         |         |         |         |         |                       |                       |         |         |         |         |         |         |         |                         |      |      |      |      |      |      |      |      |      |      |      |      |      |      |      |      |      |      |      |      |      |      |       |      |       |                       |      |       |      |      |       |      |       |       |       |       |       |       |       |       |       |       |       |       |       |       |       |       |        |       |       |       |      |       |      |      |       |      |       |      |      |      |       |      |       |      |       |       |      |      |      |      |      |      |      |      |      |          |    |    |    |     |   |   |    |    |       |    |    |    |    |    |                  |                  |                  |        |    |    |    |    |    |    |    |           |     |  |      |      |  |      |  |     |      |     |  |     |  |      |  |  |       |      |       |       |      |     |       |      |
| Frag. Inten. (% of TIC)                                                                                                                                                                                                                                                                                                                                                                                                                                                                                                                                                                                                                                                                                                                                                                                                                                                                                                                                                                                                                                                                                                                                                                                                                                                                                                                                                                                                                                                                                                                                                                                                                                                                                                                                                                                                                                                                                                                                                                                                                                                                                                                                                                                                                                                                                                                                                                                                                                                                                                                              | 0.00   | 1.68    | 0.07   | 0.07             | 2.04                        | 0.60                            | 2.84                       | 4.40                        | 3.35            | 7.32    | 2.01        | 1.74              | 2.54                                                           | 6.86               | 9.14             | 2.98             | 1.90                  | 1.93                  | 3.11    | 5.82    | 1.88    | 3.49    | 16.46   | 5.33    | 11.43   |         |         |         |         |         |                       |                       |         |         |         |         |         |         |         |                         |      |      |      |      |      |      |      |      |      |      |      |      |      |      |      |      |      |      |      |      |      |      |       |      |       |                       |      |       |      |      |       |      |       |       |       |       |       |       |       |       |       |       |       |       |       |       |       |       |        |       |       |       |      |       |      |      |       |      |       |      |      |      |       |      |       |      |       |       |      |      |      |      |      |      |      |      |      |          |    |    |    |     |   |   |    |    |       |    |    |    |    |    |                  |                  |                  |        |    |    |    |    |    |    |    |           |     |  |      |      |  |      |  |     |      |     |  |     |  |      |  |  |       |      |       |       |      |     |       |      |
| Rel. Inten. (% of BP)                                                                                                                                                                                                                                                                                                                                                                                                                                                                                                                                                                                                                                                                                                                                                                                                                                                                                                                                                                                                                                                                                                                                                                                                                                                                                                                                                                                                                                                                                                                                                                                                                                                                                                                                                                                                                                                                                                                                                                                                                                                                                                                                                                                                                                                                                                                                                                                                                                                                                                                                | 0.01   | 10.23   | 0.43   | 0.42             | 12.39                       | 3.63                            | 17.25                      | 26.75                       | 20.34           | 44.46   | 12.19       | 10.55             | 15.44                                                          | 41.65              | 55.53            | 18.10            | 11.51                 | 11.75                 | 18.87   | 41.44   | 11.43   | 21.23   | 100.00  | 32.39   | 69.42   |         |         |         |         |         |                       |                       |         |         |         |         |         |         |         |                         |      |      |      |      |      |      |      |      |      |      |      |      |      |      |      |      |      |      |      |      |      |      |       |      |       |                       |      |       |      |      |       |      |       |       |       |       |       |       |       |       |       |       |       |       |       |       |       |       |        |       |       |       |      |       |      |      |       |      |       |      |      |      |       |      |       |      |       |       |      |      |      |      |      |      |      |      |      |          |    |    |    |     |   |   |    |    |       |    |    |    |    |    |                  |                  |                  |        |    |    |    |    |    |    |    |           |     |  |      |      |  |      |  |     |      |     |  |     |  |      |  |  |       |      |       |       |      |     |       |      |
| Score                                                                                                                                                                                                                                                                                                                                                                                                                                                                                                                                                                                                                                                                                                                                                                                                                                                                                                                                                                                                                                                                                                                                                                                                                                                                                                                                                                                                                                                                                                                                                                                                                                                                                                                                                                                                                                                                                                                                                                                                                                                                                                                                                                                                                                                                                                                                                                                                                                                                                                                                                | 0.20   | -0.10   | 0.22   | 0.20             | -0.12                       | 1.00                            | -0.17                      | 0.50                        | 0.50            | 0.50    | -0.12       | 0.75              | -0.15                                                          | 0.50               | -0.56            | -0.18            | 1.50                  | 1.50                  | 0.50    | 1.50    | 0.50    | 0.50    | 1.50    | 1.50    | 1.50    |         |         |         |         |         |                       |                       |         |         |         |         |         |         |         |                         |      |      |      |      |      |      |      |      |      |      |      |      |      |      |      |      |      |      |      |      |      |      |       |      |       |                       |      |       |      |      |       |      |       |       |       |       |       |       |       |       |       |       |       |       |       |       |       |       |        |       |       |       |      |       |      |      |       |      |       |      |      |      |       |      |       |      |       |       |      |      |      |      |      |      |      |      |      |          |    |    |    |     |   |   |    |    |       |    |    |    |    |    |                  |                  |                  |        |    |    |    |    |    |    |    |           |     |  |      |      |  |      |  |     |      |     |  |     |  |      |  |  |       |      |       |       |      |     |       |      |
| Ion-type                                                                                                                                                                                                                                                                                                                                                                                                                                                                                                                                                                                                                                                                                                                                                                                                                                                                                                                                                                                                                                                                                                                                                                                                                                                                                                                                                                                                                                                                                                                                                                                                                                                                                                                                                                                                                                                                                                                                                                                                                                                                                                                                                                                                                                                                                                                                                                                                                                                                                                                                             | PR     | LI      | LI     | RKQ              | Y                           | Y                               | b1                         | b1                          | GY-28           | b1      | GY          | GY                | b2                                                             | b2                 | Y5 <sup>+2</sup> | Y5 <sup>+2</sup> | Y5 <sup>+2</sup>      | Y3+H2O                | Y3      | Y3      | Y3      | Y4      | Y4      | Y5      | Y6      |         |         |         |         |         |                       |                       |         |         |         |         |         |         |         |                         |      |      |      |      |      |      |      |      |      |      |      |      |      |      |      |      |      |      |      |      |      |      |       |      |       |                       |      |       |      |      |       |      |       |       |       |       |       |       |       |       |       |       |       |       |       |       |       |       |        |       |       |       |      |       |      |      |       |      |       |      |      |      |       |      |       |      |       |       |      |      |      |      |      |      |      |      |      |          |    |    |    |     |   |   |    |    |       |    |    |    |    |    |                  |                  |                  |        |    |    |    |    |    |    |    |           |     |  |      |      |  |      |  |     |      |     |  |     |  |      |  |  |       |      |       |       |      |     |       |      |
| Delta ppm                                                                                                                                                                                                                                                                                                                                                                                                                                                                                                                                                                                                                                                                                                                                                                                                                                                                                                                                                                                                                                                                                                                                                                                                                                                                                                                                                                                                                                                                                                                                                                                                                                                                                                                                                                                                                                                                                                                                                                                                                                                                                                                                                                                                                                                                                                                                                                                                                                                                                                                                            | 9.5    |         | 24.1   | 38.4             |                             | 16.2                            |                            | 6.4                         | 15.3            | 7.0     |             | 8.3               |                                                                | 11.7               |                  |                  | -18.3                 | 17.3                  | -13.4   | -19.5   | 15.0    | 8.1     | -12.6   | -5.6    |         |         |         |         |         |         |                       |                       |         |         |         |         |         |         |         |                         |      |      |      |      |      |      |      |      |      |      |      |      |      |      |      |      |      |      |      |      |      |      |       |      |       |                       |      |       |      |      |       |      |       |       |       |       |       |       |       |       |       |       |       |       |       |       |       |       |        |       |       |       |      |       |      |      |       |      |       |      |      |      |       |      |       |      |       |       |      |      |      |      |      |      |      |      |      |          |    |    |    |     |   |   |    |    |       |    |    |    |    |    |                  |                  |                  |        |    |    |    |    |    |    |    |           |     |  |      |      |  |      |  |     |      |     |  |     |  |      |  |  |       |      |       |       |      |     |       |      |

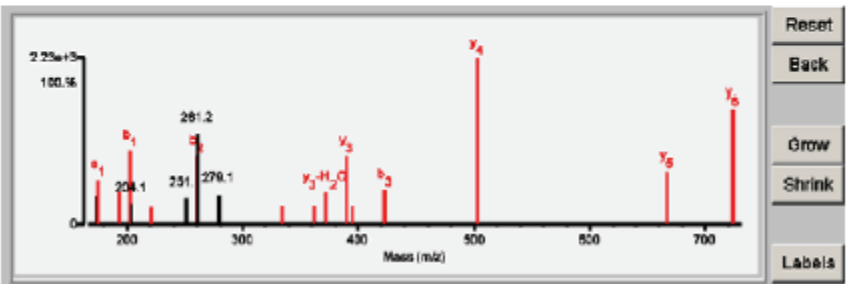

13

Detailed Results

| Rank                                                                                                                                                                                                                                                                                                                                                                                                                                                                                                                                                                                                                                                                                                                                                                                                                                                                                                                                                                                                                                                                                                                                                                                                                                                                                                                                                                                                                                                                                                                                                                                                                                                                                                                                                                                                                                                                                                                                                                                                                                                                                                                                                                                                                                                                                                                                                                                                                                                                                                                                    | Score  | SPI (%) | BCS     | # Unmatched Ions | Sequence                                                    | MH <sup>+</sup> Calculated (Da) | MH <sup>+</sup> Error (Da) | MH <sup>+</sup> Error (ppm) | Protein MW/pi (Da) | Species | Accession #           | M8-Digest Index #                                                         | Protein Name |                    |         |         |         |         |         |          |          |          |          |          |                       |         |         |         |         |         |         |         |         |          |          |          |          |          |          |                         |      |      |      |      |      |      |      |      |      |      |      |      |      |      |      |      |      |      |      |      |      |      |      |      |      |                       |      |      |       |       |       |       |       |       |       |       |       |       |       |       |        |       |       |       |       |       |       |       |       |       |       |       |      |      |      |      |      |       |      |      |      |      |       |      |      |       |      |      |       |      |      |      |      |      |      |      |      |          |   |    |    |    |    |    |    |    |    |    |    |    |    |    |    |    |    |    |    |     |     |     |     |     |     |           |      |      |      |       |      |      |      |       |      |       |      |      |       |       |      |       |       |       |       |      |      |  |  |  |  |
|-----------------------------------------------------------------------------------------------------------------------------------------------------------------------------------------------------------------------------------------------------------------------------------------------------------------------------------------------------------------------------------------------------------------------------------------------------------------------------------------------------------------------------------------------------------------------------------------------------------------------------------------------------------------------------------------------------------------------------------------------------------------------------------------------------------------------------------------------------------------------------------------------------------------------------------------------------------------------------------------------------------------------------------------------------------------------------------------------------------------------------------------------------------------------------------------------------------------------------------------------------------------------------------------------------------------------------------------------------------------------------------------------------------------------------------------------------------------------------------------------------------------------------------------------------------------------------------------------------------------------------------------------------------------------------------------------------------------------------------------------------------------------------------------------------------------------------------------------------------------------------------------------------------------------------------------------------------------------------------------------------------------------------------------------------------------------------------------------------------------------------------------------------------------------------------------------------------------------------------------------------------------------------------------------------------------------------------------------------------------------------------------------------------------------------------------------------------------------------------------------------------------------------------------|--------|---------|---------|------------------|-------------------------------------------------------------|---------------------------------|----------------------------|-----------------------------|--------------------|---------|-----------------------|---------------------------------------------------------------------------|--------------|--------------------|---------|---------|---------|---------|---------|----------|----------|----------|----------|----------|-----------------------|---------|---------|---------|---------|---------|---------|---------|---------|----------|----------|----------|----------|----------|----------|-------------------------|------|------|------|------|------|------|------|------|------|------|------|------|------|------|------|------|------|------|------|------|------|------|------|------|------|-----------------------|------|------|-------|-------|-------|-------|-------|-------|-------|-------|-------|-------|-------|-------|--------|-------|-------|-------|-------|-------|-------|-------|-------|-------|-------|-------|------|------|------|------|------|-------|------|------|------|------|-------|------|------|-------|------|------|-------|------|------|------|------|------|------|------|------|----------|---|----|----|----|----|----|----|----|----|----|----|----|----|----|----|----|----|----|----|-----|-----|-----|-----|-----|-----|-----------|------|------|------|-------|------|------|------|-------|------|-------|------|------|-------|-------|------|-------|-------|-------|-------|------|------|--|--|--|--|
| 1                                                                                                                                                                                                                                                                                                                                                                                                                                                                                                                                                                                                                                                                                                                                                                                                                                                                                                                                                                                                                                                                                                                                                                                                                                                                                                                                                                                                                                                                                                                                                                                                                                                                                                                                                                                                                                                                                                                                                                                                                                                                                                                                                                                                                                                                                                                                                                                                                                                                                                                                       | 19.22  | 81.1    | 14      | 426              | (L) Q G V D V L L A I D A I T A I V I T A M G P K / G R (T) | 2121.0290                       | -0.0178                    | -8.3                        | 81056.016.70       | HUMAN   | P10809 80213          | 60 kDa heat shock protein, mitochondrial precursor - Homo sapiens (Human) |              |                    |         |         |         |         |         |          |          |          |          |          |                       |         |         |         |         |         |         |         |         |          |          |          |          |          |          |                         |      |      |      |      |      |      |      |      |      |      |      |      |      |      |      |      |      |      |      |      |      |      |      |      |      |                       |      |      |       |       |       |       |       |       |       |       |       |       |       |       |        |       |       |       |       |       |       |       |       |       |       |       |      |      |      |      |      |       |      |      |      |      |       |      |      |       |      |      |       |      |      |      |      |      |      |      |      |          |   |    |    |    |    |    |    |    |    |    |    |    |    |    |    |    |    |    |    |     |     |     |     |     |     |           |      |      |      |       |      |      |      |       |      |       |      |      |       |       |      |       |       |       |       |      |      |  |  |  |  |
| <table border="1"> <thead> <tr> <th>Fragment-Ion (m/z)</th> <th>72.080</th> <th>88.088</th> <th>176.117</th> <th>232.138</th> <th>488.178</th> <th>658.287</th> <th>682.900</th> <th>801.282</th> <th>848.016</th> <th>714.348</th> <th>718.348<sup>92</sup></th> <th>780.358</th> <th>785.380</th> <th>788.358</th> <th>881.406</th> <th>900.402</th> <th>968.466</th> <th>871.441</th> <th>880.473</th> <th>1070.508</th> <th>1141.637</th> <th>1150.688</th> <th>1240.618</th> <th>1338.840</th> <th>1407.876</th> </tr> </thead> <tbody> <tr> <td>Frag. Inten. (% of TIC)</td> <td>0.04</td> <td>0.13</td> <td>1.32</td> <td>2.03</td> <td>3.30</td> <td>2.23</td> <td>3.75</td> <td>8.52</td> <td>8.30</td> <td>7.29</td> <td>1.30</td> <td>2.84</td> <td>5.04</td> <td>3.04</td> <td>8.88</td> <td>3.04</td> <td>2.37</td> <td>7.14</td> <td>4.52</td> <td>7.48</td> <td>5.41</td> <td>3.08</td> <td>4.10</td> <td>2.35</td> <td>2.38</td> </tr> <tr> <td>Rel. Inten. (% of BP)</td> <td>0.45</td> <td>1.47</td> <td>14.81</td> <td>22.88</td> <td>37.15</td> <td>25.13</td> <td>42.22</td> <td>97.01</td> <td>93.43</td> <td>82.05</td> <td>14.63</td> <td>32.00</td> <td>56.78</td> <td>34.27</td> <td>100.00</td> <td>34.23</td> <td>25.68</td> <td>80.34</td> <td>60.89</td> <td>84.17</td> <td>60.89</td> <td>34.70</td> <td>46.20</td> <td>25.43</td> <td>26.81</td> </tr> <tr> <td>Score</td> <td>0.50</td> <td>0.22</td> <td>1.50</td> <td>1.50</td> <td>0.50</td> <td>-0.25</td> <td>1.50</td> <td>0.50</td> <td>1.50</td> <td>0.50</td> <td>-0.15</td> <td>1.50</td> <td>0.50</td> <td>-0.34</td> <td>1.50</td> <td>0.50</td> <td>-0.27</td> <td>0.50</td> <td>1.50</td> <td>0.50</td> <td>0.50</td> <td>1.50</td> <td>0.50</td> <td>1.50</td> <td>1.50</td> </tr> <tr> <td>Ion-type</td> <td>V</td> <td>LI</td> <td>y1</td> <td>y2</td> <td>b4</td> <td>y4</td> <td>y5</td> <td>y6</td> <td>y6</td> <td>b6</td> <td>b7</td> <td>b7</td> <td>b7</td> <td>y7</td> <td>b8</td> <td>b8</td> <td>y8</td> <td>b9</td> <td>y8</td> <td>b10</td> <td>b11</td> <td>y10</td> <td>b12</td> <td>y12</td> <td>y13</td> </tr> <tr> <td>Delta ppm</td> <td>-8.0</td> <td>-4.9</td> <td>-8.9</td> <td>-17.3</td> <td>-8.7</td> <td>-4.1</td> <td>-6.4</td> <td>-14.3</td> <td>-5.5</td> <td>-10.1</td> <td>-9.4</td> <td>-8.4</td> <td>-13.5</td> <td>-11.2</td> <td>-7.8</td> <td>-10.4</td> <td>-17.3</td> <td>-15.3</td> <td>-10.2</td> <td>-7.2</td> <td>-8.9</td> <td></td> <td></td> <td></td> <td></td> </tr> </tbody> </table> |        |         |         |                  |                                                             |                                 |                            |                             |                    |         |                       |                                                                           |              | Fragment-Ion (m/z) | 72.080  | 88.088  | 176.117 | 232.138 | 488.178 | 658.287  | 682.900  | 801.282  | 848.016  | 714.348  | 718.348 <sup>92</sup> | 780.358 | 785.380 | 788.358 | 881.406 | 900.402 | 968.466 | 871.441 | 880.473 | 1070.508 | 1141.637 | 1150.688 | 1240.618 | 1338.840 | 1407.876 | Frag. Inten. (% of TIC) | 0.04 | 0.13 | 1.32 | 2.03 | 3.30 | 2.23 | 3.75 | 8.52 | 8.30 | 7.29 | 1.30 | 2.84 | 5.04 | 3.04 | 8.88 | 3.04 | 2.37 | 7.14 | 4.52 | 7.48 | 5.41 | 3.08 | 4.10 | 2.35 | 2.38 | Rel. Inten. (% of BP) | 0.45 | 1.47 | 14.81 | 22.88 | 37.15 | 25.13 | 42.22 | 97.01 | 93.43 | 82.05 | 14.63 | 32.00 | 56.78 | 34.27 | 100.00 | 34.23 | 25.68 | 80.34 | 60.89 | 84.17 | 60.89 | 34.70 | 46.20 | 25.43 | 26.81 | Score | 0.50 | 0.22 | 1.50 | 1.50 | 0.50 | -0.25 | 1.50 | 0.50 | 1.50 | 0.50 | -0.15 | 1.50 | 0.50 | -0.34 | 1.50 | 0.50 | -0.27 | 0.50 | 1.50 | 0.50 | 0.50 | 1.50 | 0.50 | 1.50 | 1.50 | Ion-type | V | LI | y1 | y2 | b4 | y4 | y5 | y6 | y6 | b6 | b7 | b7 | b7 | y7 | b8 | b8 | y8 | b9 | y8 | b10 | b11 | y10 | b12 | y12 | y13 | Delta ppm | -8.0 | -4.9 | -8.9 | -17.3 | -8.7 | -4.1 | -6.4 | -14.3 | -5.5 | -10.1 | -9.4 | -8.4 | -13.5 | -11.2 | -7.8 | -10.4 | -17.3 | -15.3 | -10.2 | -7.2 | -8.9 |  |  |  |  |
| Fragment-Ion (m/z)                                                                                                                                                                                                                                                                                                                                                                                                                                                                                                                                                                                                                                                                                                                                                                                                                                                                                                                                                                                                                                                                                                                                                                                                                                                                                                                                                                                                                                                                                                                                                                                                                                                                                                                                                                                                                                                                                                                                                                                                                                                                                                                                                                                                                                                                                                                                                                                                                                                                                                                      | 72.080 | 88.088  | 176.117 | 232.138          | 488.178                                                     | 658.287                         | 682.900                    | 801.282                     | 848.016            | 714.348 | 718.348 <sup>92</sup> | 780.358                                                                   | 785.380      | 788.358            | 881.406 | 900.402 | 968.466 | 871.441 | 880.473 | 1070.508 | 1141.637 | 1150.688 | 1240.618 | 1338.840 | 1407.876              |         |         |         |         |         |         |         |         |          |          |          |          |          |          |                         |      |      |      |      |      |      |      |      |      |      |      |      |      |      |      |      |      |      |      |      |      |      |      |      |      |                       |      |      |       |       |       |       |       |       |       |       |       |       |       |       |        |       |       |       |       |       |       |       |       |       |       |       |      |      |      |      |      |       |      |      |      |      |       |      |      |       |      |      |       |      |      |      |      |      |      |      |      |          |   |    |    |    |    |    |    |    |    |    |    |    |    |    |    |    |    |    |    |     |     |     |     |     |     |           |      |      |      |       |      |      |      |       |      |       |      |      |       |       |      |       |       |       |       |      |      |  |  |  |  |
| Frag. Inten. (% of TIC)                                                                                                                                                                                                                                                                                                                                                                                                                                                                                                                                                                                                                                                                                                                                                                                                                                                                                                                                                                                                                                                                                                                                                                                                                                                                                                                                                                                                                                                                                                                                                                                                                                                                                                                                                                                                                                                                                                                                                                                                                                                                                                                                                                                                                                                                                                                                                                                                                                                                                                                 | 0.04   | 0.13    | 1.32    | 2.03             | 3.30                                                        | 2.23                            | 3.75                       | 8.52                        | 8.30               | 7.29    | 1.30                  | 2.84                                                                      | 5.04         | 3.04               | 8.88    | 3.04    | 2.37    | 7.14    | 4.52    | 7.48     | 5.41     | 3.08     | 4.10     | 2.35     | 2.38                  |         |         |         |         |         |         |         |         |          |          |          |          |          |          |                         |      |      |      |      |      |      |      |      |      |      |      |      |      |      |      |      |      |      |      |      |      |      |      |      |      |                       |      |      |       |       |       |       |       |       |       |       |       |       |       |       |        |       |       |       |       |       |       |       |       |       |       |       |      |      |      |      |      |       |      |      |      |      |       |      |      |       |      |      |       |      |      |      |      |      |      |      |      |          |   |    |    |    |    |    |    |    |    |    |    |    |    |    |    |    |    |    |    |     |     |     |     |     |     |           |      |      |      |       |      |      |      |       |      |       |      |      |       |       |      |       |       |       |       |      |      |  |  |  |  |
| Rel. Inten. (% of BP)                                                                                                                                                                                                                                                                                                                                                                                                                                                                                                                                                                                                                                                                                                                                                                                                                                                                                                                                                                                                                                                                                                                                                                                                                                                                                                                                                                                                                                                                                                                                                                                                                                                                                                                                                                                                                                                                                                                                                                                                                                                                                                                                                                                                                                                                                                                                                                                                                                                                                                                   | 0.45   | 1.47    | 14.81   | 22.88            | 37.15                                                       | 25.13                           | 42.22                      | 97.01                       | 93.43              | 82.05   | 14.63                 | 32.00                                                                     | 56.78        | 34.27              | 100.00  | 34.23   | 25.68   | 80.34   | 60.89   | 84.17    | 60.89    | 34.70    | 46.20    | 25.43    | 26.81                 |         |         |         |         |         |         |         |         |          |          |          |          |          |          |                         |      |      |      |      |      |      |      |      |      |      |      |      |      |      |      |      |      |      |      |      |      |      |      |      |      |                       |      |      |       |       |       |       |       |       |       |       |       |       |       |       |        |       |       |       |       |       |       |       |       |       |       |       |      |      |      |      |      |       |      |      |      |      |       |      |      |       |      |      |       |      |      |      |      |      |      |      |      |          |   |    |    |    |    |    |    |    |    |    |    |    |    |    |    |    |    |    |    |     |     |     |     |     |     |           |      |      |      |       |      |      |      |       |      |       |      |      |       |       |      |       |       |       |       |      |      |  |  |  |  |
| Score                                                                                                                                                                                                                                                                                                                                                                                                                                                                                                                                                                                                                                                                                                                                                                                                                                                                                                                                                                                                                                                                                                                                                                                                                                                                                                                                                                                                                                                                                                                                                                                                                                                                                                                                                                                                                                                                                                                                                                                                                                                                                                                                                                                                                                                                                                                                                                                                                                                                                                                                   | 0.50   | 0.22    | 1.50    | 1.50             | 0.50                                                        | -0.25                           | 1.50                       | 0.50                        | 1.50               | 0.50    | -0.15                 | 1.50                                                                      | 0.50         | -0.34              | 1.50    | 0.50    | -0.27   | 0.50    | 1.50    | 0.50     | 0.50     | 1.50     | 0.50     | 1.50     | 1.50                  |         |         |         |         |         |         |         |         |          |          |          |          |          |          |                         |      |      |      |      |      |      |      |      |      |      |      |      |      |      |      |      |      |      |      |      |      |      |      |      |      |                       |      |      |       |       |       |       |       |       |       |       |       |       |       |       |        |       |       |       |       |       |       |       |       |       |       |       |      |      |      |      |      |       |      |      |      |      |       |      |      |       |      |      |       |      |      |      |      |      |      |      |      |          |   |    |    |    |    |    |    |    |    |    |    |    |    |    |    |    |    |    |    |     |     |     |     |     |     |           |      |      |      |       |      |      |      |       |      |       |      |      |       |       |      |       |       |       |       |      |      |  |  |  |  |
| Ion-type                                                                                                                                                                                                                                                                                                                                                                                                                                                                                                                                                                                                                                                                                                                                                                                                                                                                                                                                                                                                                                                                                                                                                                                                                                                                                                                                                                                                                                                                                                                                                                                                                                                                                                                                                                                                                                                                                                                                                                                                                                                                                                                                                                                                                                                                                                                                                                                                                                                                                                                                | V      | LI      | y1      | y2               | b4                                                          | y4                              | y5                         | y6                          | y6                 | b6      | b7                    | b7                                                                        | b7           | y7                 | b8      | b8      | y8      | b9      | y8      | b10      | b11      | y10      | b12      | y12      | y13                   |         |         |         |         |         |         |         |         |          |          |          |          |          |          |                         |      |      |      |      |      |      |      |      |      |      |      |      |      |      |      |      |      |      |      |      |      |      |      |      |      |                       |      |      |       |       |       |       |       |       |       |       |       |       |       |       |        |       |       |       |       |       |       |       |       |       |       |       |      |      |      |      |      |       |      |      |      |      |       |      |      |       |      |      |       |      |      |      |      |      |      |      |      |          |   |    |    |    |    |    |    |    |    |    |    |    |    |    |    |    |    |    |    |     |     |     |     |     |     |           |      |      |      |       |      |      |      |       |      |       |      |      |       |       |      |       |       |       |       |      |      |  |  |  |  |
| Delta ppm                                                                                                                                                                                                                                                                                                                                                                                                                                                                                                                                                                                                                                                                                                                                                                                                                                                                                                                                                                                                                                                                                                                                                                                                                                                                                                                                                                                                                                                                                                                                                                                                                                                                                                                                                                                                                                                                                                                                                                                                                                                                                                                                                                                                                                                                                                                                                                                                                                                                                                                               | -8.0   | -4.9    | -8.9    | -17.3            | -8.7                                                        | -4.1                            | -6.4                       | -14.3                       | -5.5               | -10.1   | -9.4                  | -8.4                                                                      | -13.5        | -11.2              | -7.8    | -10.4   | -17.3   | -15.3   | -10.2   | -7.2     | -8.9     |          |          |          |                       |         |         |         |         |         |         |         |         |          |          |          |          |          |          |                         |      |      |      |      |      |      |      |      |      |      |      |      |      |      |      |      |      |      |      |      |      |      |      |      |      |                       |      |      |       |       |       |       |       |       |       |       |       |       |       |       |        |       |       |       |       |       |       |       |       |       |       |       |      |      |      |      |      |       |      |      |      |      |       |      |      |       |      |      |       |      |      |      |      |      |      |      |      |          |   |    |    |    |    |    |    |    |    |    |    |    |    |    |    |    |    |    |    |     |     |     |     |     |     |           |      |      |      |       |      |      |      |       |      |       |      |      |       |       |      |       |       |       |       |      |      |  |  |  |  |

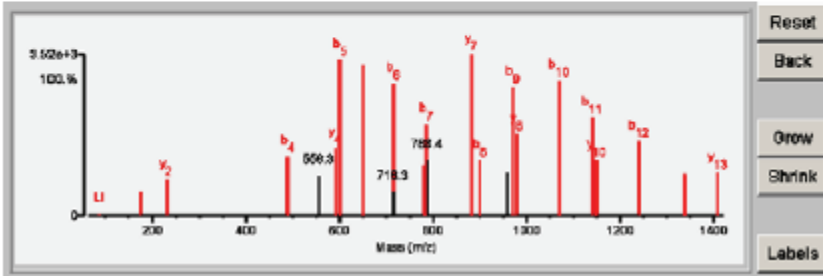

14

Detailed Results

| Rank                                                                                                                                                                                                                                                                                                                                                                                                                                                                                                                                                                                                                                                                                                                                                                                                                                                                                                                                                                                                                                                                                                                                                                                                                                                                                                                                                                                                                                                                                                                                                                                                                                                                                                                                                                                                                                                                                                                                                                                                                                                                                                                                                                                                                                                                                                                                                                                                                                                                                                    | Score  | SPI (%) | BCS     | # Unmatched Ions | Sequence                                  | MH <sup>+</sup> Calculated (Da) | MH <sup>+</sup> Error (Da) | MH <sup>+</sup> Error (ppm) | Protein MW/pi (Da) | Species | Accession #   | M8-Digest Index #                                | Protein Name |                    |         |         |         |         |         |         |         |         |         |         |          |         |         |         |         |         |         |         |         |         |         |         |         |         |          |                         |      |      |      |      |      |      |      |      |      |      |      |      |      |      |      |      |      |      |      |      |      |       |       |      |      |                       |      |      |       |       |       |       |       |       |       |       |       |       |       |       |       |       |       |       |       |       |       |        |       |       |       |       |      |      |       |      |       |       |      |       |      |      |      |       |      |      |       |      |      |       |       |      |       |      |      |      |      |          |    |    |    |    |    |    |    |    |        |    |    |    |        |    |    |    |    |    |    |    |    |    |    |    |     |           |      |       |  |       |  |  |      |  |     |      |       |  |      |      |  |       |       |  |  |       |  |      |      |     |     |
|---------------------------------------------------------------------------------------------------------------------------------------------------------------------------------------------------------------------------------------------------------------------------------------------------------------------------------------------------------------------------------------------------------------------------------------------------------------------------------------------------------------------------------------------------------------------------------------------------------------------------------------------------------------------------------------------------------------------------------------------------------------------------------------------------------------------------------------------------------------------------------------------------------------------------------------------------------------------------------------------------------------------------------------------------------------------------------------------------------------------------------------------------------------------------------------------------------------------------------------------------------------------------------------------------------------------------------------------------------------------------------------------------------------------------------------------------------------------------------------------------------------------------------------------------------------------------------------------------------------------------------------------------------------------------------------------------------------------------------------------------------------------------------------------------------------------------------------------------------------------------------------------------------------------------------------------------------------------------------------------------------------------------------------------------------------------------------------------------------------------------------------------------------------------------------------------------------------------------------------------------------------------------------------------------------------------------------------------------------------------------------------------------------------------------------------------------------------------------------------------------------|--------|---------|---------|------------------|-------------------------------------------|---------------------------------|----------------------------|-----------------------------|--------------------|---------|---------------|--------------------------------------------------|--------------|--------------------|---------|---------|---------|---------|---------|---------|---------|---------|---------|---------|----------|---------|---------|---------|---------|---------|---------|---------|---------|---------|---------|---------|---------|---------|----------|-------------------------|------|------|------|------|------|------|------|------|------|------|------|------|------|------|------|------|------|------|------|------|------|-------|-------|------|------|-----------------------|------|------|-------|-------|-------|-------|-------|-------|-------|-------|-------|-------|-------|-------|-------|-------|-------|-------|-------|-------|-------|--------|-------|-------|-------|-------|------|------|-------|------|-------|-------|------|-------|------|------|------|-------|------|------|-------|------|------|-------|-------|------|-------|------|------|------|------|----------|----|----|----|----|----|----|----|----|--------|----|----|----|--------|----|----|----|----|----|----|----|----|----|----|----|-----|-----------|------|-------|--|-------|--|--|------|--|-----|------|-------|--|------|------|--|-------|-------|--|--|-------|--|------|------|-----|-----|
| 1                                                                                                                                                                                                                                                                                                                                                                                                                                                                                                                                                                                                                                                                                                                                                                                                                                                                                                                                                                                                                                                                                                                                                                                                                                                                                                                                                                                                                                                                                                                                                                                                                                                                                                                                                                                                                                                                                                                                                                                                                                                                                                                                                                                                                                                                                                                                                                                                                                                                                                       | 11.21  | 76.6    | 8       | 8/25             | (K) I A V T I Q I I T I G P V M P Y R (N) | 1470.7807                       | 0.0088                     | 4.8                         | 24281.8/11.86      | HUMAN   | P26373 481881 | 60S ribosomal protein L13 - Homo sapiens (Human) |              |                    |         |         |         |         |         |         |         |         |         |         |          |         |         |         |         |         |         |         |         |         |         |         |         |         |          |                         |      |      |      |      |      |      |      |      |      |      |      |      |      |      |      |      |      |      |      |      |      |       |       |      |      |                       |      |      |       |       |       |       |       |       |       |       |       |       |       |       |       |       |       |       |       |       |       |        |       |       |       |       |      |      |       |      |       |       |      |       |      |      |      |       |      |      |       |      |      |       |       |      |       |      |      |      |      |          |    |    |    |    |    |    |    |    |        |    |    |    |        |    |    |    |    |    |    |    |    |    |    |    |     |           |      |       |  |       |  |  |      |  |     |      |       |  |      |      |  |       |       |  |  |       |  |      |      |     |     |
| <table border="1"> <thead> <tr> <th>Fragment-Ion (m/z)</th> <th>88.088</th> <th>101.088</th> <th>188.072</th> <th>202.088</th> <th>205.085</th> <th>228.135</th> <th>273.128</th> <th>316.183</th> <th>358.188</th> <th>371.238</th> <th>374.171</th> <th>410.282</th> <th>484.218</th> <th>602.241</th> <th>617.218</th> <th>615.308</th> <th>688.384</th> <th>711.310</th> <th>711.812</th> <th>718.338</th> <th>720.300</th> <th>766.418</th> <th>868.488</th> <th>888.668</th> <th>1097.817</th> </tr> </thead> <tbody> <tr> <td>Frag. Inten. (% of TIC)</td> <td>0.30</td> <td>0.12</td> <td>5.93</td> <td>4.60</td> <td>2.42</td> <td>2.15</td> <td>2.84</td> <td>3.31</td> <td>3.40</td> <td>9.43</td> <td>3.77</td> <td>2.38</td> <td>2.93</td> <td>5.21</td> <td>1.99</td> <td>3.30</td> <td>5.84</td> <td>2.05</td> <td>2.10</td> <td>2.84</td> <td>2.04</td> <td>12.12</td> <td>11.32</td> <td>5.60</td> <td>2.05</td> </tr> <tr> <td>Rel. Inten. (% of BP)</td> <td>2.44</td> <td>0.97</td> <td>48.94</td> <td>37.98</td> <td>19.94</td> <td>17.81</td> <td>23.41</td> <td>27.34</td> <td>28.05</td> <td>77.80</td> <td>31.08</td> <td>19.63</td> <td>24.14</td> <td>43.00</td> <td>16.43</td> <td>27.27</td> <td>48.16</td> <td>16.89</td> <td>17.33</td> <td>23.41</td> <td>15.85</td> <td>100.00</td> <td>93.42</td> <td>46.19</td> <td>16.90</td> </tr> <tr> <td>Score</td> <td>0.22</td> <td>0.50</td> <td>-0.49</td> <td>0.50</td> <td>-0.20</td> <td>-0.15</td> <td>0.50</td> <td>-0.27</td> <td>0.25</td> <td>1.50</td> <td>0.50</td> <td>-0.20</td> <td>0.25</td> <td>0.50</td> <td>-0.15</td> <td>0.50</td> <td>1.50</td> <td>-0.17</td> <td>-0.17</td> <td>0.50</td> <td>-0.17</td> <td>1.50</td> <td>1.50</td> <td>1.50</td> <td>1.50</td> </tr> <tr> <td>Ion-type</td> <td>LI</td> <td>GK</td> <td>b1</td> <td>b1</td> <td>b2</td> <td>b2</td> <td>b2</td> <td>b2</td> <td>b3+H2O</td> <td>y3</td> <td>b3</td> <td>b4</td> <td>b4+H2O</td> <td>b4</td> <td>b5</td> <td>b5</td> <td>y6</td> <td>b6</td> <td>y6</td> <td>b6</td> <td>y6</td> <td>y7</td> <td>y8</td> <td>y9</td> <td>y10</td> </tr> <tr> <td>Delta ppm</td> <td>-0.3</td> <td>-33.0</td> <td></td> <td>-10.5</td> <td></td> <td></td> <td>-5.3</td> <td></td> <td>2.4</td> <td>-2.8</td> <td>-12.9</td> <td></td> <td>-8.7</td> <td>13.0</td> <td></td> <td>-17.0</td> <td>-11.2</td> <td></td> <td></td> <td>-39.3</td> <td></td> <td>-7.5</td> <td>-9.0</td> <td>1.4</td> <td>3.3</td> </tr> </tbody> </table> |        |         |         |                  |                                           |                                 |                            |                             |                    |         |               |                                                  |              | Fragment-Ion (m/z) | 88.088  | 101.088 | 188.072 | 202.088 | 205.085 | 228.135 | 273.128 | 316.183 | 358.188 | 371.238 | 374.171  | 410.282 | 484.218 | 602.241 | 617.218 | 615.308 | 688.384 | 711.310 | 711.812 | 718.338 | 720.300 | 766.418 | 868.488 | 888.668 | 1097.817 | Frag. Inten. (% of TIC) | 0.30 | 0.12 | 5.93 | 4.60 | 2.42 | 2.15 | 2.84 | 3.31 | 3.40 | 9.43 | 3.77 | 2.38 | 2.93 | 5.21 | 1.99 | 3.30 | 5.84 | 2.05 | 2.10 | 2.84 | 2.04 | 12.12 | 11.32 | 5.60 | 2.05 | Rel. Inten. (% of BP) | 2.44 | 0.97 | 48.94 | 37.98 | 19.94 | 17.81 | 23.41 | 27.34 | 28.05 | 77.80 | 31.08 | 19.63 | 24.14 | 43.00 | 16.43 | 27.27 | 48.16 | 16.89 | 17.33 | 23.41 | 15.85 | 100.00 | 93.42 | 46.19 | 16.90 | Score | 0.22 | 0.50 | -0.49 | 0.50 | -0.20 | -0.15 | 0.50 | -0.27 | 0.25 | 1.50 | 0.50 | -0.20 | 0.25 | 0.50 | -0.15 | 0.50 | 1.50 | -0.17 | -0.17 | 0.50 | -0.17 | 1.50 | 1.50 | 1.50 | 1.50 | Ion-type | LI | GK | b1 | b1 | b2 | b2 | b2 | b2 | b3+H2O | y3 | b3 | b4 | b4+H2O | b4 | b5 | b5 | y6 | b6 | y6 | b6 | y6 | y7 | y8 | y9 | y10 | Delta ppm | -0.3 | -33.0 |  | -10.5 |  |  | -5.3 |  | 2.4 | -2.8 | -12.9 |  | -8.7 | 13.0 |  | -17.0 | -11.2 |  |  | -39.3 |  | -7.5 | -9.0 | 1.4 | 3.3 |
| Fragment-Ion (m/z)                                                                                                                                                                                                                                                                                                                                                                                                                                                                                                                                                                                                                                                                                                                                                                                                                                                                                                                                                                                                                                                                                                                                                                                                                                                                                                                                                                                                                                                                                                                                                                                                                                                                                                                                                                                                                                                                                                                                                                                                                                                                                                                                                                                                                                                                                                                                                                                                                                                                                      | 88.088 | 101.088 | 188.072 | 202.088          | 205.085                                   | 228.135                         | 273.128                    | 316.183                     | 358.188            | 371.238 | 374.171       | 410.282                                          | 484.218      | 602.241            | 617.218 | 615.308 | 688.384 | 711.310 | 711.812 | 718.338 | 720.300 | 766.418 | 868.488 | 888.668 | 1097.817 |         |         |         |         |         |         |         |         |         |         |         |         |         |          |                         |      |      |      |      |      |      |      |      |      |      |      |      |      |      |      |      |      |      |      |      |      |       |       |      |      |                       |      |      |       |       |       |       |       |       |       |       |       |       |       |       |       |       |       |       |       |       |       |        |       |       |       |       |      |      |       |      |       |       |      |       |      |      |      |       |      |      |       |      |      |       |       |      |       |      |      |      |      |          |    |    |    |    |    |    |    |    |        |    |    |    |        |    |    |    |    |    |    |    |    |    |    |    |     |           |      |       |  |       |  |  |      |  |     |      |       |  |      |      |  |       |       |  |  |       |  |      |      |     |     |
| Frag. Inten. (% of TIC)                                                                                                                                                                                                                                                                                                                                                                                                                                                                                                                                                                                                                                                                                                                                                                                                                                                                                                                                                                                                                                                                                                                                                                                                                                                                                                                                                                                                                                                                                                                                                                                                                                                                                                                                                                                                                                                                                                                                                                                                                                                                                                                                                                                                                                                                                                                                                                                                                                                                                 | 0.30   | 0.12    | 5.93    | 4.60             | 2.42                                      | 2.15                            | 2.84                       | 3.31                        | 3.40               | 9.43    | 3.77          | 2.38                                             | 2.93         | 5.21               | 1.99    | 3.30    | 5.84    | 2.05    | 2.10    | 2.84    | 2.04    | 12.12   | 11.32   | 5.60    | 2.05     |         |         |         |         |         |         |         |         |         |         |         |         |         |          |                         |      |      |      |      |      |      |      |      |      |      |      |      |      |      |      |      |      |      |      |      |      |       |       |      |      |                       |      |      |       |       |       |       |       |       |       |       |       |       |       |       |       |       |       |       |       |       |       |        |       |       |       |       |      |      |       |      |       |       |      |       |      |      |      |       |      |      |       |      |      |       |       |      |       |      |      |      |      |          |    |    |    |    |    |    |    |    |        |    |    |    |        |    |    |    |    |    |    |    |    |    |    |    |     |           |      |       |  |       |  |  |      |  |     |      |       |  |      |      |  |       |       |  |  |       |  |      |      |     |     |
| Rel. Inten. (% of BP)                                                                                                                                                                                                                                                                                                                                                                                                                                                                                                                                                                                                                                                                                                                                                                                                                                                                                                                                                                                                                                                                                                                                                                                                                                                                                                                                                                                                                                                                                                                                                                                                                                                                                                                                                                                                                                                                                                                                                                                                                                                                                                                                                                                                                                                                                                                                                                                                                                                                                   | 2.44   | 0.97    | 48.94   | 37.98            | 19.94                                     | 17.81                           | 23.41                      | 27.34                       | 28.05              | 77.80   | 31.08         | 19.63                                            | 24.14        | 43.00              | 16.43   | 27.27   | 48.16   | 16.89   | 17.33   | 23.41   | 15.85   | 100.00  | 93.42   | 46.19   | 16.90    |         |         |         |         |         |         |         |         |         |         |         |         |         |          |                         |      |      |      |      |      |      |      |      |      |      |      |      |      |      |      |      |      |      |      |      |      |       |       |      |      |                       |      |      |       |       |       |       |       |       |       |       |       |       |       |       |       |       |       |       |       |       |       |        |       |       |       |       |      |      |       |      |       |       |      |       |      |      |      |       |      |      |       |      |      |       |       |      |       |      |      |      |      |          |    |    |    |    |    |    |    |    |        |    |    |    |        |    |    |    |    |    |    |    |    |    |    |    |     |           |      |       |  |       |  |  |      |  |     |      |       |  |      |      |  |       |       |  |  |       |  |      |      |     |     |
| Score                                                                                                                                                                                                                                                                                                                                                                                                                                                                                                                                                                                                                                                                                                                                                                                                                                                                                                                                                                                                                                                                                                                                                                                                                                                                                                                                                                                                                                                                                                                                                                                                                                                                                                                                                                                                                                                                                                                                                                                                                                                                                                                                                                                                                                                                                                                                                                                                                                                                                                   | 0.22   | 0.50    | -0.49   | 0.50             | -0.20                                     | -0.15                           | 0.50                       | -0.27                       | 0.25               | 1.50    | 0.50          | -0.20                                            | 0.25         | 0.50               | -0.15   | 0.50    | 1.50    | -0.17   | -0.17   | 0.50    | -0.17   | 1.50    | 1.50    | 1.50    | 1.50     |         |         |         |         |         |         |         |         |         |         |         |         |         |          |                         |      |      |      |      |      |      |      |      |      |      |      |      |      |      |      |      |      |      |      |      |      |       |       |      |      |                       |      |      |       |       |       |       |       |       |       |       |       |       |       |       |       |       |       |       |       |       |       |        |       |       |       |       |      |      |       |      |       |       |      |       |      |      |      |       |      |      |       |      |      |       |       |      |       |      |      |      |      |          |    |    |    |    |    |    |    |    |        |    |    |    |        |    |    |    |    |    |    |    |    |    |    |    |     |           |      |       |  |       |  |  |      |  |     |      |       |  |      |      |  |       |       |  |  |       |  |      |      |     |     |
| Ion-type                                                                                                                                                                                                                                                                                                                                                                                                                                                                                                                                                                                                                                                                                                                                                                                                                                                                                                                                                                                                                                                                                                                                                                                                                                                                                                                                                                                                                                                                                                                                                                                                                                                                                                                                                                                                                                                                                                                                                                                                                                                                                                                                                                                                                                                                                                                                                                                                                                                                                                | LI     | GK      | b1      | b1               | b2                                        | b2                              | b2                         | b2                          | b3+H2O             | y3      | b3            | b4                                               | b4+H2O       | b4                 | b5      | b5      | y6      | b6      | y6      | b6      | y6      | y7      | y8      | y9      | y10      |         |         |         |         |         |         |         |         |         |         |         |         |         |          |                         |      |      |      |      |      |      |      |      |      |      |      |      |      |      |      |      |      |      |      |      |      |       |       |      |      |                       |      |      |       |       |       |       |       |       |       |       |       |       |       |       |       |       |       |       |       |       |       |        |       |       |       |       |      |      |       |      |       |       |      |       |      |      |      |       |      |      |       |      |      |       |       |      |       |      |      |      |      |          |    |    |    |    |    |    |    |    |        |    |    |    |        |    |    |    |    |    |    |    |    |    |    |    |     |           |      |       |  |       |  |  |      |  |     |      |       |  |      |      |  |       |       |  |  |       |  |      |      |     |     |
| Delta ppm                                                                                                                                                                                                                                                                                                                                                                                                                                                                                                                                                                                                                                                                                                                                                                                                                                                                                                                                                                                                                                                                                                                                                                                                                                                                                                                                                                                                                                                                                                                                                                                                                                                                                                                                                                                                                                                                                                                                                                                                                                                                                                                                                                                                                                                                                                                                                                                                                                                                                               | -0.3   | -33.0   |         | -10.5            |                                           |                                 | -5.3                       |                             | 2.4                | -2.8    | -12.9         |                                                  | -8.7         | 13.0               |         | -17.0   | -11.2   |         |         | -39.3   |         | -7.5    | -9.0    | 1.4     | 3.3      |         |         |         |         |         |         |         |         |         |         |         |         |         |          |                         |      |      |      |      |      |      |      |      |      |      |      |      |      |      |      |      |      |      |      |      |      |       |       |      |      |                       |      |      |       |       |       |       |       |       |       |       |       |       |       |       |       |       |       |       |       |       |       |        |       |       |       |       |      |      |       |      |       |       |      |       |      |      |      |       |      |      |       |      |      |       |       |      |       |      |      |      |      |          |    |    |    |    |    |    |    |    |        |    |    |    |        |    |    |    |    |    |    |    |    |    |    |    |     |           |      |       |  |       |  |  |      |  |     |      |       |  |      |      |  |       |       |  |  |       |  |      |      |     |     |

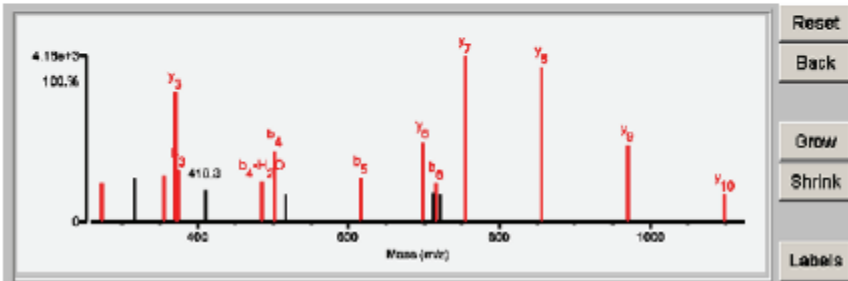



15

## Detailed Results

| Rank                    | Score  | SP1 (%) | BCS     | # Unmatched Ions | Sequence                      | MH <sup>+</sup> Calculated (Da) | MH <sup>+</sup> Error (Da) | MH <sup>+</sup> Error (ppm) | Protein MW/pI (Da)    | Species | Accession #                                    | MS-Digest Index # | Protein Name                                    |                                                 |         |         |         |         |         |         |         |         |         |                |                 |
|-------------------------|--------|---------|---------|------------------|-------------------------------|---------------------------------|----------------------------|-----------------------------|-----------------------|---------|------------------------------------------------|-------------------|-------------------------------------------------|-------------------------------------------------|---------|---------|---------|---------|---------|---------|---------|---------|---------|----------------|-----------------|
| 1                       | 18.22  | 82.9    | 10      | 6/25             | (R) I A L T D H A L I A/R (S) | 1268.8824                       | 0.0069                     | 4.2                         | 29226.9/10.88         | HUMAN   | P18124                                         | 524483            | 60S ribosomal protein L7 - Homo sapiens (Human) |                                                 |         |         |         |         |         |         |         |         |         |                |                 |
| Fragment-Ion (m/z)      | 86.096 | 174.096 | 175.118 | 202.092          | 248.158                       | 273.127                         | 274.128                    | 368.238                     | 389.210 <sup>+2</sup> | 472.318 | 484.792 <sup>+2</sup>                          | 487.258           | 489.778 <sup>+2</sup>                           | 620.294 <sup>+2</sup>                           | 543.350 | 667.403 | 682.984 | 682.738 | 738.087 | 738.427 | 772.435 | 787.362 | 873.478 | 886.570        | 1057.680        |
| Frac. Inten. (% of TIC) | 0.33   | 5.15    | 2.54    | 7.81             | 4.38                          | 12.77                           | 3.19                       | 4.18                        | 2.87                  | 2.47    | 2.06                                           | 1.82              | 1.79                                            | 3.34                                            | 2.55    | 2.14    | 3.69    | 1.88    | 2.74    | 2.74    | 6.46    | 1.91    | 17.15   | 1.98           | 2.03            |
| Rel. Inten. (% of BP)   | 1.94   | 30.04   | 14.82   | 45.54            | 25.55                         | 74.42                           | 18.59                      | 24.39                       | 16.73                 | 14.37   | 12.00                                          | 10.58             | 10.46                                           | 19.49                                           | 14.88   | 12.45   | 21.54   | 10.98   | 15.99   | 15.97   | 37.65   | 11.11   | 100.00  | 11.55          | 11.84           |
| Score                   | 0.22   | 0.50    | 1.50    | 0.50             | 1.50                          | 0.50                            | -0.19                      | 1.50                        | -0.17                 | 1.50    | 0.50                                           | 0.50              | 1.50                                            | -0.22                                           | -0.11   | -0.16   | -0.11   | -0.16   | -0.16   | -0.16   | 1.50    | 0.50    | 1.50    | 1.50           | 1.50            |
| Ion-type                | LI     | a1      | y1      | b1               | y2                            | b2                              |                            | y3                          |                       | y4      | y <sub>0</sub> -H <sub>2</sub> O <sup>+2</sup> | b4                | y <sub>9</sub> <sup>+2</sup>                    | y <sub>10</sub> -H <sub>2</sub> O <sup>+2</sup> | y5      | y6      |         |         |         |         | y7      | b7      | y8      | y <sub>9</sub> | y <sub>10</sub> |
| Delta ppm               | -6.1   | 0.5     | -3.7    | 6.3              | 9.1                           | -2.3                            |                            | -7.0                        |                       | -11.4   | 25.2                                           | -8.2              | -12.4                                           | -8.5                                            | -21.2   | -1.3    |         |         |         |         | -7.5    | -5.2    | -3.4    | 6.8            | -19.4           |

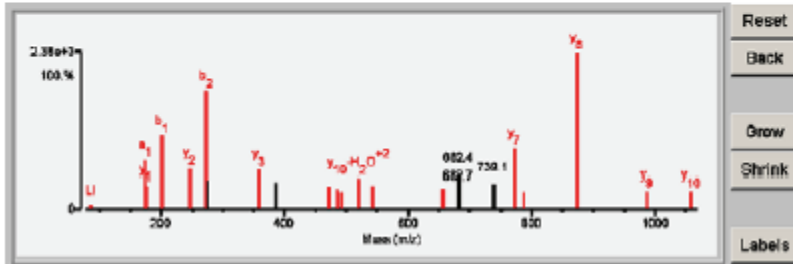

16

## Detailed Results

| Rank                    | Score  | SP1 (%) | BCS     | # Unmatched Ions | Sequence                    | MH <sup>+</sup> Calculated (Da) | MH <sup>+</sup> Error (Da) | MH <sup>+</sup> Error (ppm) | Protein MW/pI (Da) | Species | Accession #                  | MS-Digest Index #            | Protein Name                                    |                              |                              |         |                       |         |         |         |         |                                  |                |                |         |
|-------------------------|--------|---------|---------|------------------|-----------------------------|---------------------------------|----------------------------|-----------------------------|--------------------|---------|------------------------------|------------------------------|-------------------------------------------------|------------------------------|------------------------------|---------|-----------------------|---------|---------|---------|---------|----------------------------------|----------------|----------------|---------|
| 1                       | 18.31  | 86.1    | 9       | 5/25             | (I) A L T D H A L I A/R (S) | 1145.6983                       | -0.0098                    | -6.8                        | 29226.9/10.88      | HUMAN   | P18124                       | 524483                       | 60S ribosomal protein L7 - Homo sapiens (Human) |                              |                              |         |                       |         |         |         |         |                                  |                |                |         |
| Fragment-Ion (m/z)      | 88.096 | 87.101  | 132.048 | 175.118          | 187.146                     | 216.138                         | 248.158                    | 273.127                     | 301.127            | 368.244 | 389.238 <sup>+2</sup>        | 437.250 <sup>+2</sup>        | 472.328                                         | 484.773 <sup>+2</sup>        | 489.784 <sup>+2</sup>        | 499.238 | 543.348 <sup>+2</sup> | 603.241 | 628.286 | 667.406 | 674.277 | 756.386                          | 772.431        | 856.468        | 873.471 |
| Frac. Inten. (% of TIC) | 1.01   | 2.72    | 1.80    | 4.81             | 2.64                        | 1.91                            | 7.26                       | 4.41                        | 2.04               | 2.99    | 3.35                         | 2.07                         | 4.79                                            | 3.48                         | 1.95                         | 2.16    | 3.85                  | 1.82    | 1.84    | 7.25    | 2.78    | 2.22                             | 12.97          | 2.63           | 15.24   |
| Rel. Inten. (% of BP)   | 6.60   | 17.87   | 11.79   | 31.60            | 17.33                       | 12.51                           | 47.62                      | 28.92                       | 13.39              | 19.65   | 22.07                        | 13.60                        | 31.45                                           | 22.95                        | 12.77                        | 14.16   | 25.32                 | 11.95   | 12.05   | 47.52   | 18.27   | 14.55                            | 85.13          | 17.29          | 100.00  |
| Score                   | 0.22   | -0.18   | 0.50    | 1.50             | 0.50                        | 0.75                            | 1.50                       | 0.50                        | 0.75               | 1.50    | -0.22                        | 1.50                         | 1.50                                            | 0.50                         | 1.50                         | -0.14   | -0.25                 | 0.50    | -0.12   | 1.50    | 0.50    | 0.50                             | 1.50           | 1.50           | 1.50    |
| Ion-type                | LI     | a1      | y1      | b1               | LT-28                       | LT                              | y2                         | b2                          | TDH                | y3      | y <sub>9</sub> <sup>+2</sup> | y <sub>9</sub> <sup>+2</sup> | y <sub>9</sub> <sup>+2</sup>                    | y <sub>9</sub> <sup>+2</sup> | y <sub>9</sub> <sup>+2</sup> | b5      | b6                    |         |         | y7      | b7      | y <sub>8</sub> -H <sub>2</sub> O | y <sub>8</sub> | y <sub>9</sub> |         |
| Delta ppm               | -8.4   |         | -6.5    | -3.2             | -0.5                        | -11.7                           | 0.5                        | -3.8                        | 2.0                | 11.9    |                              | 16.1                         | -3.2                                            | -14.5                        | -2.8                         |         |                       | -7.8    |         | 1.9     | -7.9    | -25.3                            | -0.7           | -13.9          | -9.6    |

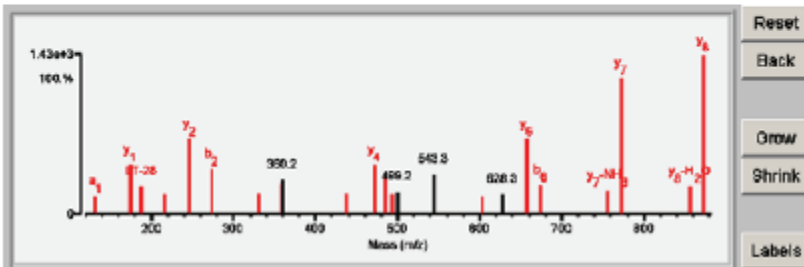

17

Detailed Results

| Rank                                                                                                                                                                                                                                                                                                                                                                                                                                                                                                                                                                                                                                                                                                                                                                                                                                                                                                                                                                                                                                                                                                                                                                                                                                                                                                                                                                                                                                                                                                                                                                                                                                                                                                                                                                                                                                                                                                                                                                                                                                                                                                                                                                                                                                                                                                                                                                                                                                                                                                         | Score  | SP1 (%) | BCS    | # Unmatched Ions | Sequence                                          | MH <sup>+</sup> Calculated (Da) | MH <sup>+</sup> Error (Da) | MH <sup>+</sup> Error (ppm) | Protein MW(pI) (Da) | Species | Accession #      | MS-Digest Index #                                | Protein Name |                    |         |         |                       |         |         |         |                       |                       |         |         |         |         |         |         |         |         |                       |         |         |         |                       |                       |         |         |         |                         |      |      |      |      |      |      |      |      |      |       |      |      |      |      |      |      |      |       |      |      |      |      |      |      |      |                       |      |      |       |       |       |       |       |       |       |        |       |       |       |       |       |       |       |       |       |       |       |       |       |       |       |       |      |      |       |       |       |       |      |       |      |      |       |      |      |      |      |      |       |      |       |      |       |       |       |       |       |          |   |    |    |    |    |    |     |     |    |    |    |    |     |    |      |    |    |    |    |    |    |    |    |    |    |           |      |      |  |  |  |  |      |    |      |      |     |       |     |      |       |  |     |  |  |     |  |  |  |  |
|--------------------------------------------------------------------------------------------------------------------------------------------------------------------------------------------------------------------------------------------------------------------------------------------------------------------------------------------------------------------------------------------------------------------------------------------------------------------------------------------------------------------------------------------------------------------------------------------------------------------------------------------------------------------------------------------------------------------------------------------------------------------------------------------------------------------------------------------------------------------------------------------------------------------------------------------------------------------------------------------------------------------------------------------------------------------------------------------------------------------------------------------------------------------------------------------------------------------------------------------------------------------------------------------------------------------------------------------------------------------------------------------------------------------------------------------------------------------------------------------------------------------------------------------------------------------------------------------------------------------------------------------------------------------------------------------------------------------------------------------------------------------------------------------------------------------------------------------------------------------------------------------------------------------------------------------------------------------------------------------------------------------------------------------------------------------------------------------------------------------------------------------------------------------------------------------------------------------------------------------------------------------------------------------------------------------------------------------------------------------------------------------------------------------------------------------------------------------------------------------------------------|--------|---------|--------|------------------|---------------------------------------------------|---------------------------------|----------------------------|-----------------------------|---------------------|---------|------------------|--------------------------------------------------|--------------|--------------------|---------|---------|-----------------------|---------|---------|---------|-----------------------|-----------------------|---------|---------|---------|---------|---------|---------|---------|---------|-----------------------|---------|---------|---------|-----------------------|-----------------------|---------|---------|---------|-------------------------|------|------|------|------|------|------|------|------|------|-------|------|------|------|------|------|------|------|-------|------|------|------|------|------|------|------|-----------------------|------|------|-------|-------|-------|-------|-------|-------|-------|--------|-------|-------|-------|-------|-------|-------|-------|-------|-------|-------|-------|-------|-------|-------|-------|-------|------|------|-------|-------|-------|-------|------|-------|------|------|-------|------|------|------|------|------|-------|------|-------|------|-------|-------|-------|-------|-------|----------|---|----|----|----|----|----|-----|-----|----|----|----|----|-----|----|------|----|----|----|----|----|----|----|----|----|----|-----------|------|------|--|--|--|--|------|----|------|------|-----|-------|-----|------|-------|--|-----|--|--|-----|--|--|--|--|
| 1                                                                                                                                                                                                                                                                                                                                                                                                                                                                                                                                                                                                                                                                                                                                                                                                                                                                                                                                                                                                                                                                                                                                                                                                                                                                                                                                                                                                                                                                                                                                                                                                                                                                                                                                                                                                                                                                                                                                                                                                                                                                                                                                                                                                                                                                                                                                                                                                                                                                                                            | 10.27  | 80.2    | 7      | 13/26            | (T) Q V N S E E D K G A L A R K / L V Y A I R (T) | 2299.1082                       | 0.0011                     | 0.6                         | 29965.8/10.81       | HUMAN   | P62424<br>S23961 | 60S ribosomal protein L7a - Homo sapiens (Human) |              |                    |         |         |                       |         |         |         |                       |                       |         |         |         |         |         |         |         |         |                       |         |         |         |                       |                       |         |         |         |                         |      |      |      |      |      |      |      |      |      |       |      |      |      |      |      |      |      |       |      |      |      |      |      |      |      |                       |      |      |       |       |       |       |       |       |       |        |       |       |       |       |       |       |       |       |       |       |       |       |       |       |       |       |      |      |       |       |       |       |      |       |      |      |       |      |      |      |      |      |       |      |       |      |       |       |       |       |       |          |   |    |    |    |    |    |     |     |    |    |    |    |     |    |      |    |    |    |    |    |    |    |    |    |    |           |      |      |  |  |  |  |      |    |      |      |     |       |     |      |       |  |     |  |  |     |  |  |  |  |
| <table border="1"> <thead> <tr> <th>Fragment-ion (m/z)</th> <th>72.082</th> <th>86.098</th> <th>89.068</th> <th>94.064</th> <th>117.067</th> <th>120.078</th> <th>129.065</th> <th>172.040</th> <th>176.123</th> <th>217.064</th> <th>218.068</th> <th>288.203</th> <th>301.147</th> <th>359.241</th> <th>448.162</th> <th>488.278</th> <th>541.188<sup>+2</sup></th> <th>587.351</th> <th>686.274</th> <th>700.439</th> <th>701.408<sup>+3</sup></th> <th>822.481<sup>+2</sup></th> <th>823.394</th> <th>870.486</th> <th>841.629</th> </tr> </thead> <tbody> <tr> <td>Frac. Inten. (% of TIC)</td> <td>0.11</td> <td>0.35</td> <td>2.94</td> <td>3.12</td> <td>2.51</td> <td>2.27</td> <td>4.08</td> <td>4.33</td> <td>2.98</td> <td>18.04</td> <td>3.24</td> <td>2.62</td> <td>2.77</td> <td>2.51</td> <td>2.65</td> <td>6.35</td> <td>3.92</td> <td>13.09</td> <td>2.65</td> <td>4.70</td> <td>3.16</td> <td>2.29</td> <td>2.81</td> <td>2.85</td> <td>4.38</td> </tr> <tr> <td>Rel. Inten. (% of BP)</td> <td>0.61</td> <td>1.93</td> <td>16.29</td> <td>17.29</td> <td>15.55</td> <td>12.58</td> <td>22.61</td> <td>24.00</td> <td>16.52</td> <td>100.00</td> <td>17.96</td> <td>14.54</td> <td>15.38</td> <td>13.93</td> <td>14.69</td> <td>35.22</td> <td>16.20</td> <td>72.57</td> <td>14.74</td> <td>26.08</td> <td>17.52</td> <td>12.70</td> <td>15.56</td> <td>15.85</td> <td>24.16</td> </tr> <tr> <td>Score</td> <td>0.50</td> <td>0.22</td> <td>-0.16</td> <td>-0.17</td> <td>-0.16</td> <td>-0.13</td> <td>0.75</td> <td>-0.24</td> <td>1.50</td> <td>0.50</td> <td>-0.18</td> <td>1.50</td> <td>0.75</td> <td>1.50</td> <td>0.75</td> <td>1.50</td> <td>-0.16</td> <td>1.50</td> <td>-0.15</td> <td>1.50</td> <td>-0.18</td> <td>-0.13</td> <td>-0.16</td> <td>-0.16</td> <td>-0.24</td> </tr> <tr> <td>Ion-type</td> <td>V</td> <td>LI</td> <td>LI</td> <td>LI</td> <td>LI</td> <td>LI</td> <td>QKR</td> <td>QKR</td> <td>Y1</td> <td>b1</td> <td>y1</td> <td>y2</td> <td>VN8</td> <td>Y3</td> <td>NSED</td> <td>Y4</td> <td>Y5</td> <td>Y6</td> <td>Y6</td> <td>Y6</td> <td>Y6</td> <td>Y6</td> <td>Y6</td> <td>Y6</td> <td>Y6</td> </tr> <tr> <td>Delta ppm</td> <td>18.4</td> <td>-0.3</td> <td></td> <td></td> <td></td> <td></td> <td>-9.7</td> <td>GA</td> <td>21.4</td> <td>-6.6</td> <td>0.3</td> <td>-14.8</td> <td>3.5</td> <td>-1.0</td> <td>-10.3</td> <td></td> <td>0.1</td> <td></td> <td></td> <td>6.1</td> <td></td> <td></td> <td></td> <td></td> </tr> </tbody> </table> |        |         |        |                  |                                                   |                                 |                            |                             |                     |         |                  |                                                  |              | Fragment-ion (m/z) | 72.082  | 86.098  | 89.068                | 94.064  | 117.067 | 120.078 | 129.065               | 172.040               | 176.123 | 217.064 | 218.068 | 288.203 | 301.147 | 359.241 | 448.162 | 488.278 | 541.188 <sup>+2</sup> | 587.351 | 686.274 | 700.439 | 701.408 <sup>+3</sup> | 822.481 <sup>+2</sup> | 823.394 | 870.486 | 841.629 | Frac. Inten. (% of TIC) | 0.11 | 0.35 | 2.94 | 3.12 | 2.51 | 2.27 | 4.08 | 4.33 | 2.98 | 18.04 | 3.24 | 2.62 | 2.77 | 2.51 | 2.65 | 6.35 | 3.92 | 13.09 | 2.65 | 4.70 | 3.16 | 2.29 | 2.81 | 2.85 | 4.38 | Rel. Inten. (% of BP) | 0.61 | 1.93 | 16.29 | 17.29 | 15.55 | 12.58 | 22.61 | 24.00 | 16.52 | 100.00 | 17.96 | 14.54 | 15.38 | 13.93 | 14.69 | 35.22 | 16.20 | 72.57 | 14.74 | 26.08 | 17.52 | 12.70 | 15.56 | 15.85 | 24.16 | Score | 0.50 | 0.22 | -0.16 | -0.17 | -0.16 | -0.13 | 0.75 | -0.24 | 1.50 | 0.50 | -0.18 | 1.50 | 0.75 | 1.50 | 0.75 | 1.50 | -0.16 | 1.50 | -0.15 | 1.50 | -0.18 | -0.13 | -0.16 | -0.16 | -0.24 | Ion-type | V | LI | LI | LI | LI | LI | QKR | QKR | Y1 | b1 | y1 | y2 | VN8 | Y3 | NSED | Y4 | Y5 | Y6 | Y6 | Y6 | Y6 | Y6 | Y6 | Y6 | Y6 | Delta ppm | 18.4 | -0.3 |  |  |  |  | -9.7 | GA | 21.4 | -6.6 | 0.3 | -14.8 | 3.5 | -1.0 | -10.3 |  | 0.1 |  |  | 6.1 |  |  |  |  |
| Fragment-ion (m/z)                                                                                                                                                                                                                                                                                                                                                                                                                                                                                                                                                                                                                                                                                                                                                                                                                                                                                                                                                                                                                                                                                                                                                                                                                                                                                                                                                                                                                                                                                                                                                                                                                                                                                                                                                                                                                                                                                                                                                                                                                                                                                                                                                                                                                                                                                                                                                                                                                                                                                           | 72.082 | 86.098  | 89.068 | 94.064           | 117.067                                           | 120.078                         | 129.065                    | 172.040                     | 176.123             | 217.064 | 218.068          | 288.203                                          | 301.147      | 359.241            | 448.162 | 488.278 | 541.188 <sup>+2</sup> | 587.351 | 686.274 | 700.439 | 701.408 <sup>+3</sup> | 822.481 <sup>+2</sup> | 823.394 | 870.486 | 841.629 |         |         |         |         |         |                       |         |         |         |                       |                       |         |         |         |                         |      |      |      |      |      |      |      |      |      |       |      |      |      |      |      |      |      |       |      |      |      |      |      |      |      |                       |      |      |       |       |       |       |       |       |       |        |       |       |       |       |       |       |       |       |       |       |       |       |       |       |       |       |      |      |       |       |       |       |      |       |      |      |       |      |      |      |      |      |       |      |       |      |       |       |       |       |       |          |   |    |    |    |    |    |     |     |    |    |    |    |     |    |      |    |    |    |    |    |    |    |    |    |    |           |      |      |  |  |  |  |      |    |      |      |     |       |     |      |       |  |     |  |  |     |  |  |  |  |
| Frac. Inten. (% of TIC)                                                                                                                                                                                                                                                                                                                                                                                                                                                                                                                                                                                                                                                                                                                                                                                                                                                                                                                                                                                                                                                                                                                                                                                                                                                                                                                                                                                                                                                                                                                                                                                                                                                                                                                                                                                                                                                                                                                                                                                                                                                                                                                                                                                                                                                                                                                                                                                                                                                                                      | 0.11   | 0.35    | 2.94   | 3.12             | 2.51                                              | 2.27                            | 4.08                       | 4.33                        | 2.98                | 18.04   | 3.24             | 2.62                                             | 2.77         | 2.51               | 2.65    | 6.35    | 3.92                  | 13.09   | 2.65    | 4.70    | 3.16                  | 2.29                  | 2.81    | 2.85    | 4.38    |         |         |         |         |         |                       |         |         |         |                       |                       |         |         |         |                         |      |      |      |      |      |      |      |      |      |       |      |      |      |      |      |      |      |       |      |      |      |      |      |      |      |                       |      |      |       |       |       |       |       |       |       |        |       |       |       |       |       |       |       |       |       |       |       |       |       |       |       |       |      |      |       |       |       |       |      |       |      |      |       |      |      |      |      |      |       |      |       |      |       |       |       |       |       |          |   |    |    |    |    |    |     |     |    |    |    |    |     |    |      |    |    |    |    |    |    |    |    |    |    |           |      |      |  |  |  |  |      |    |      |      |     |       |     |      |       |  |     |  |  |     |  |  |  |  |
| Rel. Inten. (% of BP)                                                                                                                                                                                                                                                                                                                                                                                                                                                                                                                                                                                                                                                                                                                                                                                                                                                                                                                                                                                                                                                                                                                                                                                                                                                                                                                                                                                                                                                                                                                                                                                                                                                                                                                                                                                                                                                                                                                                                                                                                                                                                                                                                                                                                                                                                                                                                                                                                                                                                        | 0.61   | 1.93    | 16.29  | 17.29            | 15.55                                             | 12.58                           | 22.61                      | 24.00                       | 16.52               | 100.00  | 17.96            | 14.54                                            | 15.38        | 13.93              | 14.69   | 35.22   | 16.20                 | 72.57   | 14.74   | 26.08   | 17.52                 | 12.70                 | 15.56   | 15.85   | 24.16   |         |         |         |         |         |                       |         |         |         |                       |                       |         |         |         |                         |      |      |      |      |      |      |      |      |      |       |      |      |      |      |      |      |      |       |      |      |      |      |      |      |      |                       |      |      |       |       |       |       |       |       |       |        |       |       |       |       |       |       |       |       |       |       |       |       |       |       |       |       |      |      |       |       |       |       |      |       |      |      |       |      |      |      |      |      |       |      |       |      |       |       |       |       |       |          |   |    |    |    |    |    |     |     |    |    |    |    |     |    |      |    |    |    |    |    |    |    |    |    |    |           |      |      |  |  |  |  |      |    |      |      |     |       |     |      |       |  |     |  |  |     |  |  |  |  |
| Score                                                                                                                                                                                                                                                                                                                                                                                                                                                                                                                                                                                                                                                                                                                                                                                                                                                                                                                                                                                                                                                                                                                                                                                                                                                                                                                                                                                                                                                                                                                                                                                                                                                                                                                                                                                                                                                                                                                                                                                                                                                                                                                                                                                                                                                                                                                                                                                                                                                                                                        | 0.50   | 0.22    | -0.16  | -0.17            | -0.16                                             | -0.13                           | 0.75                       | -0.24                       | 1.50                | 0.50    | -0.18            | 1.50                                             | 0.75         | 1.50               | 0.75    | 1.50    | -0.16                 | 1.50    | -0.15   | 1.50    | -0.18                 | -0.13                 | -0.16   | -0.16   | -0.24   |         |         |         |         |         |                       |         |         |         |                       |                       |         |         |         |                         |      |      |      |      |      |      |      |      |      |       |      |      |      |      |      |      |      |       |      |      |      |      |      |      |      |                       |      |      |       |       |       |       |       |       |       |        |       |       |       |       |       |       |       |       |       |       |       |       |       |       |       |       |      |      |       |       |       |       |      |       |      |      |       |      |      |      |      |      |       |      |       |      |       |       |       |       |       |          |   |    |    |    |    |    |     |     |    |    |    |    |     |    |      |    |    |    |    |    |    |    |    |    |    |           |      |      |  |  |  |  |      |    |      |      |     |       |     |      |       |  |     |  |  |     |  |  |  |  |
| Ion-type                                                                                                                                                                                                                                                                                                                                                                                                                                                                                                                                                                                                                                                                                                                                                                                                                                                                                                                                                                                                                                                                                                                                                                                                                                                                                                                                                                                                                                                                                                                                                                                                                                                                                                                                                                                                                                                                                                                                                                                                                                                                                                                                                                                                                                                                                                                                                                                                                                                                                                     | V      | LI      | LI     | LI               | LI                                                | LI                              | QKR                        | QKR                         | Y1                  | b1      | y1               | y2                                               | VN8          | Y3                 | NSED    | Y4      | Y5                    | Y6      | Y6      | Y6      | Y6                    | Y6                    | Y6      | Y6      | Y6      |         |         |         |         |         |                       |         |         |         |                       |                       |         |         |         |                         |      |      |      |      |      |      |      |      |      |       |      |      |      |      |      |      |      |       |      |      |      |      |      |      |      |                       |      |      |       |       |       |       |       |       |       |        |       |       |       |       |       |       |       |       |       |       |       |       |       |       |       |       |      |      |       |       |       |       |      |       |      |      |       |      |      |      |      |      |       |      |       |      |       |       |       |       |       |          |   |    |    |    |    |    |     |     |    |    |    |    |     |    |      |    |    |    |    |    |    |    |    |    |    |           |      |      |  |  |  |  |      |    |      |      |     |       |     |      |       |  |     |  |  |     |  |  |  |  |
| Delta ppm                                                                                                                                                                                                                                                                                                                                                                                                                                                                                                                                                                                                                                                                                                                                                                                                                                                                                                                                                                                                                                                                                                                                                                                                                                                                                                                                                                                                                                                                                                                                                                                                                                                                                                                                                                                                                                                                                                                                                                                                                                                                                                                                                                                                                                                                                                                                                                                                                                                                                                    | 18.4   | -0.3    |        |                  |                                                   |                                 | -9.7                       | GA                          | 21.4                | -6.6    | 0.3              | -14.8                                            | 3.5          | -1.0               | -10.3   |         | 0.1                   |         |         | 6.1     |                       |                       |         |         |         |         |         |         |         |         |                       |         |         |         |                       |                       |         |         |         |                         |      |      |      |      |      |      |      |      |      |       |      |      |      |      |      |      |      |       |      |      |      |      |      |      |      |                       |      |      |       |       |       |       |       |       |       |        |       |       |       |       |       |       |       |       |       |       |       |       |       |       |       |       |      |      |       |       |       |       |      |       |      |      |       |      |      |      |      |      |       |      |       |      |       |       |       |       |       |          |   |    |    |    |    |    |     |     |    |    |    |    |     |    |      |    |    |    |    |    |    |    |    |    |    |           |      |      |  |  |  |  |      |    |      |      |     |       |     |      |       |  |     |  |  |     |  |  |  |  |

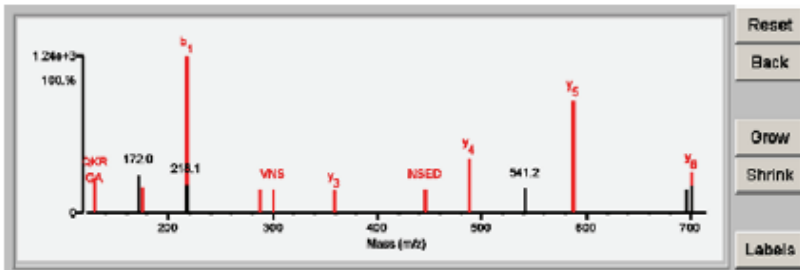

18

Detailed Results

| Rank                                                                                                                                                                                                                                                                                                                                                                                                                                                                                                                                                                                                                                                                                                                                                                                                                                                                                                                                                                                                                                                                                                                                                                                                                                                                                                                                                                                                                                                                                                                                                                                                                                                                                                                                                                                                                                                                                                                                                                                                                                                                                                                                                                                                                                                                                                                                                                                                                                                                                                                                                                                                        | Score  | SP1 (%) | BCS                   | # Unmatched Ions | Sequence                                          | MH <sup>+</sup> Calculated (Da) | MH <sup>+</sup> Error (Da) | MH <sup>+</sup> Error (ppm) | Protein MW(pI) (Da) | Species | Accession #                        | MS-Digest Index #                                         | Protein Name          |                       |         |         |         |         |         |         |         |                       |         |          |          |         |                       |                       |         |         |         |         |         |         |         |         |         |          |          |                         |      |      |      |      |      |      |      |      |      |      |      |       |      |      |      |      |      |      |       |      |      |      |      |      |      |                       |       |      |       |      |       |       |       |       |       |       |       |        |       |       |       |       |       |      |       |       |      |      |       |       |       |       |       |      |      |      |      |      |      |       |      |      |      |      |       |      |       |      |       |       |      |      |       |       |      |      |      |          |    |    |                       |    |      |    |                     |    |    |    |                                    |                     |    |                     |    |    |     |     |     |     |     |     |     |     |     |           |     |       |      |     |     |      |      |      |      |     |      |      |  |  |  |  |  |  |      |  |  |  |  |  |
|-------------------------------------------------------------------------------------------------------------------------------------------------------------------------------------------------------------------------------------------------------------------------------------------------------------------------------------------------------------------------------------------------------------------------------------------------------------------------------------------------------------------------------------------------------------------------------------------------------------------------------------------------------------------------------------------------------------------------------------------------------------------------------------------------------------------------------------------------------------------------------------------------------------------------------------------------------------------------------------------------------------------------------------------------------------------------------------------------------------------------------------------------------------------------------------------------------------------------------------------------------------------------------------------------------------------------------------------------------------------------------------------------------------------------------------------------------------------------------------------------------------------------------------------------------------------------------------------------------------------------------------------------------------------------------------------------------------------------------------------------------------------------------------------------------------------------------------------------------------------------------------------------------------------------------------------------------------------------------------------------------------------------------------------------------------------------------------------------------------------------------------------------------------------------------------------------------------------------------------------------------------------------------------------------------------------------------------------------------------------------------------------------------------------------------------------------------------------------------------------------------------------------------------------------------------------------------------------------------------|--------|---------|-----------------------|------------------|---------------------------------------------------|---------------------------------|----------------------------|-----------------------------|---------------------|---------|------------------------------------|-----------------------------------------------------------|-----------------------|-----------------------|---------|---------|---------|---------|---------|---------|---------|-----------------------|---------|----------|----------|---------|-----------------------|-----------------------|---------|---------|---------|---------|---------|---------|---------|---------|---------|----------|----------|-------------------------|------|------|------|------|------|------|------|------|------|------|------|-------|------|------|------|------|------|------|-------|------|------|------|------|------|------|-----------------------|-------|------|-------|------|-------|-------|-------|-------|-------|-------|-------|--------|-------|-------|-------|-------|-------|------|-------|-------|------|------|-------|-------|-------|-------|-------|------|------|------|------|------|------|-------|------|------|------|------|-------|------|-------|------|-------|-------|------|------|-------|-------|------|------|------|----------|----|----|-----------------------|----|------|----|---------------------|----|----|----|------------------------------------|---------------------|----|---------------------|----|----|-----|-----|-----|-----|-----|-----|-----|-----|-----|-----------|-----|-------|------|-----|-----|------|------|------|------|-----|------|------|--|--|--|--|--|--|------|--|--|--|--|--|
| 1                                                                                                                                                                                                                                                                                                                                                                                                                                                                                                                                                                                                                                                                                                                                                                                                                                                                                                                                                                                                                                                                                                                                                                                                                                                                                                                                                                                                                                                                                                                                                                                                                                                                                                                                                                                                                                                                                                                                                                                                                                                                                                                                                                                                                                                                                                                                                                                                                                                                                                                                                                                                           | 12.57  | 78.8    | 8                     | 8/25             | (N) V L A S / G Q V T I T / M Y / P G I A D R (M) | 1625.7662                       | 0.0285                     | 17.6                        | 42009.2/5.24        | HUMAN   | P62736<br>9969                     | Actin, aortic smooth muscle - Homo sapiens (Human)        |                       |                       |         |         |         |         |         |         |         |                       |         |          |          |         |                       |                       |         |         |         |         |         |         |         |         |         |          |          |                         |      |      |      |      |      |      |      |      |      |      |      |       |      |      |      |      |      |      |       |      |      |      |      |      |      |                       |       |      |       |      |       |       |       |       |       |       |       |        |       |       |       |       |       |      |       |       |      |      |       |       |       |       |       |      |      |      |      |      |      |       |      |      |      |      |       |      |       |      |       |       |      |      |       |       |      |      |      |          |    |    |                       |    |      |    |                     |    |    |    |                                    |                     |    |                     |    |    |     |     |     |     |     |     |     |     |     |           |     |       |      |     |     |      |      |      |      |     |      |      |  |  |  |  |  |  |      |  |  |  |  |  |
| 1                                                                                                                                                                                                                                                                                                                                                                                                                                                                                                                                                                                                                                                                                                                                                                                                                                                                                                                                                                                                                                                                                                                                                                                                                                                                                                                                                                                                                                                                                                                                                                                                                                                                                                                                                                                                                                                                                                                                                                                                                                                                                                                                                                                                                                                                                                                                                                                                                                                                                                                                                                                                           | 12.57  | 78.8    | 8                     | 8/25             | (T) V L A S / G Q V T I T / M Y / P G I A D R (M) | 1625.7662                       | 0.0285                     | 17.6                        | 41737.0/5.29        | HUMAN   | P60709<br>10025                    | Actin, cytoplasmic 1 - Homo sapiens (Human)               |                       |                       |         |         |         |         |         |         |         |                       |         |          |          |         |                       |                       |         |         |         |         |         |         |         |         |         |          |          |                         |      |      |      |      |      |      |      |      |      |      |      |       |      |      |      |      |      |      |       |      |      |      |      |      |      |                       |       |      |       |      |       |       |       |       |       |       |       |        |       |       |       |       |       |      |       |       |      |      |       |       |       |       |       |      |      |      |      |      |      |       |      |      |      |      |       |      |       |      |       |       |      |      |       |       |      |      |      |          |    |    |                       |    |      |    |                     |    |    |    |                                    |                     |    |                     |    |    |     |     |     |     |     |     |     |     |     |           |     |       |      |     |     |      |      |      |      |     |      |      |  |  |  |  |  |  |      |  |  |  |  |  |
| 1                                                                                                                                                                                                                                                                                                                                                                                                                                                                                                                                                                                                                                                                                                                                                                                                                                                                                                                                                                                                                                                                                                                                                                                                                                                                                                                                                                                                                                                                                                                                                                                                                                                                                                                                                                                                                                                                                                                                                                                                                                                                                                                                                                                                                                                                                                                                                                                                                                                                                                                                                                                                           | 12.57  | 78.8    | 8                     | 8/25             | (N) V L A S / G Q V T I T / M Y / P G I A D R (M) | 1625.7662                       | 0.0285                     | 17.6                        | 42019.2/5.23        | HUMAN   | P68032<br>10091                    | Actin, alpha cardiac muscle 1 - Homo sapiens (Human)      |                       |                       |         |         |         |         |         |         |         |                       |         |          |          |         |                       |                       |         |         |         |         |         |         |         |         |         |          |          |                         |      |      |      |      |      |      |      |      |      |      |      |       |      |      |      |      |      |      |       |      |      |      |      |      |      |                       |       |      |       |      |       |       |       |       |       |       |       |        |       |       |       |       |       |      |       |       |      |      |       |       |       |       |       |      |      |      |      |      |      |       |      |      |      |      |       |      |       |      |       |       |      |      |       |       |      |      |      |          |    |    |                       |    |      |    |                     |    |    |    |                                    |                     |    |                     |    |    |     |     |     |     |     |     |     |     |     |           |     |       |      |     |     |      |      |      |      |     |      |      |  |  |  |  |  |  |      |  |  |  |  |  |
| 1                                                                                                                                                                                                                                                                                                                                                                                                                                                                                                                                                                                                                                                                                                                                                                                                                                                                                                                                                                                                                                                                                                                                                                                                                                                                                                                                                                                                                                                                                                                                                                                                                                                                                                                                                                                                                                                                                                                                                                                                                                                                                                                                                                                                                                                                                                                                                                                                                                                                                                                                                                                                           | 12.57  | 78.8    | 8                     | 8/25             | (T) V L A S / G Q V T I T / M Y / P G I A D R (M) | 1625.7662                       | 0.0285                     | 17.6                        | 41793.1/5.31        | HUMAN   | P63261<br>10123                    | Actin, cytoplasmic 2 - Homo sapiens (Human)               |                       |                       |         |         |         |         |         |         |         |                       |         |          |          |         |                       |                       |         |         |         |         |         |         |         |         |         |          |          |                         |      |      |      |      |      |      |      |      |      |      |      |       |      |      |      |      |      |      |       |      |      |      |      |      |      |                       |       |      |       |      |       |       |       |       |       |       |       |        |       |       |       |       |       |      |       |       |      |      |       |       |       |       |       |      |      |      |      |      |      |       |      |      |      |      |       |      |       |      |       |       |      |      |       |       |      |      |      |          |    |    |                       |    |      |    |                     |    |    |    |                                    |                     |    |                     |    |    |     |     |     |     |     |     |     |     |     |           |     |       |      |     |     |      |      |      |      |     |      |      |  |  |  |  |  |  |      |  |  |  |  |  |
| 1                                                                                                                                                                                                                                                                                                                                                                                                                                                                                                                                                                                                                                                                                                                                                                                                                                                                                                                                                                                                                                                                                                                                                                                                                                                                                                                                                                                                                                                                                                                                                                                                                                                                                                                                                                                                                                                                                                                                                                                                                                                                                                                                                                                                                                                                                                                                                                                                                                                                                                                                                                                                           | 12.57  | 78.8    | 8                     | 8/25             | (N) V L A S / G Q V T I T / M Y / P G I A D R (M) | 1625.7662                       | 0.0285                     | 17.6                        | 41877.1/5.31        | HUMAN   | P63267<br>10161                    | Actin, gamma-enteric smooth muscle - Homo sapiens (Human) |                       |                       |         |         |         |         |         |         |         |                       |         |          |          |         |                       |                       |         |         |         |         |         |         |         |         |         |          |          |                         |      |      |      |      |      |      |      |      |      |      |      |       |      |      |      |      |      |      |       |      |      |      |      |      |      |                       |       |      |       |      |       |       |       |       |       |       |       |        |       |       |       |       |       |      |       |       |      |      |       |       |       |       |       |      |      |      |      |      |      |       |      |      |      |      |       |      |       |      |       |       |      |      |       |       |      |      |      |          |    |    |                       |    |      |    |                     |    |    |    |                                    |                     |    |                     |    |    |     |     |     |     |     |     |     |     |     |           |     |       |      |     |     |      |      |      |      |     |      |      |  |  |  |  |  |  |      |  |  |  |  |  |
| <table border="1"> <thead> <tr> <th>Fragment-ion (m/z)</th> <th>70.061</th> <th>86.097</th> <th>160.077</th> <th>285.126</th> <th>301.160</th> <th>303.132</th> <th>361.181</th> <th>398.200<sup>+2</sup></th> <th>427.217</th> <th>502.240</th> <th>603.279</th> <th>628.346</th> <th>632.312<sup>+2</sup></th> <th>654.313<sup>+2</sup></th> <th>668.309</th> <th>686.334</th> <th>759.983</th> <th>783.373</th> <th>791.415</th> <th>817.368</th> <th>831.411</th> <th>898.151</th> <th>922.474</th> <th>1023.529</th> <th>1238.601</th> </tr> </thead> <tbody> <tr> <td>Frac. Inten. (% of TIC)</td> <td>2.17</td> <td>0.24</td> <td>2.79</td> <td>1.75</td> <td>3.53</td> <td>2.28</td> <td>5.03</td> <td>1.93</td> <td>2.26</td> <td>3.01</td> <td>4.02</td> <td>18.45</td> <td>2.68</td> <td>2.01</td> <td>6.67</td> <td>4.93</td> <td>2.21</td> <td>1.78</td> <td>13.10</td> <td>2.70</td> <td>1.74</td> <td>1.74</td> <td>6.10</td> <td>3.09</td> <td>2.81</td> </tr> <tr> <td>Rel. Inten. (% of BP)</td> <td>11.75</td> <td>1.32</td> <td>15.13</td> <td>9.51</td> <td>18.13</td> <td>12.35</td> <td>32.16</td> <td>10.44</td> <td>12.24</td> <td>16.34</td> <td>21.80</td> <td>100.00</td> <td>16.14</td> <td>10.80</td> <td>36.18</td> <td>26.74</td> <td>11.97</td> <td>9.53</td> <td>71.04</td> <td>14.85</td> <td>9.44</td> <td>9.41</td> <td>33.09</td> <td>16.73</td> <td>14.12</td> </tr> <tr> <td>Score</td> <td>-0.12</td> <td>0.22</td> <td>0.50</td> <td>0.50</td> <td>0.50</td> <td>0.75</td> <td>1.50</td> <td>-0.10</td> <td>0.25</td> <td>0.50</td> <td>0.50</td> <td>1.50</td> <td>-0.16</td> <td>0.50</td> <td>-0.38</td> <td>0.25</td> <td>-0.12</td> <td>-0.10</td> <td>1.50</td> <td>0.25</td> <td>-0.09</td> <td>-0.09</td> <td>1.50</td> <td>1.50</td> <td>1.50</td> </tr> <tr> <td>Ion-type</td> <td>LI</td> <td>a1</td> <td>SGGT-H<sub>2</sub>O</td> <td>b2</td> <td>SGGT</td> <td>y3</td> <td>b4-H<sub>2</sub>O</td> <td>b5</td> <td>b6</td> <td>y6</td> <td>y13-H<sub>2</sub>O<sup>+2</sup></td> <td>b7-H<sub>2</sub>O</td> <td>y7</td> <td>b8-H<sub>2</sub>O</td> <td>y8</td> <td>y9</td> <td>y12</td> <td>y12</td> <td>y12</td> <td>y12</td> <td>y12</td> <td>y12</td> <td>y12</td> <td>y12</td> <td>y12</td> </tr> <tr> <td>Delta ppm</td> <td>9.0</td> <td>-19.1</td> <td>20.2</td> <td>1.5</td> <td>4.3</td> <td>-5.3</td> <td>36.1</td> <td>11.6</td> <td>-4.3</td> <td>7.5</td> <td>10.4</td> <td>22.5</td> <td></td> <td></td> <td></td> <td></td> <td></td> <td></td> <td>10.9</td> <td></td> <td></td> <td></td> <td></td> <td></td> </tr> </tbody> </table> |        |         |                       |                  |                                                   |                                 |                            |                             |                     |         |                                    |                                                           |                       | Fragment-ion (m/z)    | 70.061  | 86.097  | 160.077 | 285.126 | 301.160 | 303.132 | 361.181 | 398.200 <sup>+2</sup> | 427.217 | 502.240  | 603.279  | 628.346 | 632.312 <sup>+2</sup> | 654.313 <sup>+2</sup> | 668.309 | 686.334 | 759.983 | 783.373 | 791.415 | 817.368 | 831.411 | 898.151 | 922.474 | 1023.529 | 1238.601 | Frac. Inten. (% of TIC) | 2.17 | 0.24 | 2.79 | 1.75 | 3.53 | 2.28 | 5.03 | 1.93 | 2.26 | 3.01 | 4.02 | 18.45 | 2.68 | 2.01 | 6.67 | 4.93 | 2.21 | 1.78 | 13.10 | 2.70 | 1.74 | 1.74 | 6.10 | 3.09 | 2.81 | Rel. Inten. (% of BP) | 11.75 | 1.32 | 15.13 | 9.51 | 18.13 | 12.35 | 32.16 | 10.44 | 12.24 | 16.34 | 21.80 | 100.00 | 16.14 | 10.80 | 36.18 | 26.74 | 11.97 | 9.53 | 71.04 | 14.85 | 9.44 | 9.41 | 33.09 | 16.73 | 14.12 | Score | -0.12 | 0.22 | 0.50 | 0.50 | 0.50 | 0.75 | 1.50 | -0.10 | 0.25 | 0.50 | 0.50 | 1.50 | -0.16 | 0.50 | -0.38 | 0.25 | -0.12 | -0.10 | 1.50 | 0.25 | -0.09 | -0.09 | 1.50 | 1.50 | 1.50 | Ion-type | LI | a1 | SGGT-H <sub>2</sub> O | b2 | SGGT | y3 | b4-H <sub>2</sub> O | b5 | b6 | y6 | y13-H <sub>2</sub> O <sup>+2</sup> | b7-H <sub>2</sub> O | y7 | b8-H <sub>2</sub> O | y8 | y9 | y12 | y12 | y12 | y12 | y12 | y12 | y12 | y12 | y12 | Delta ppm | 9.0 | -19.1 | 20.2 | 1.5 | 4.3 | -5.3 | 36.1 | 11.6 | -4.3 | 7.5 | 10.4 | 22.5 |  |  |  |  |  |  | 10.9 |  |  |  |  |  |
| Fragment-ion (m/z)                                                                                                                                                                                                                                                                                                                                                                                                                                                                                                                                                                                                                                                                                                                                                                                                                                                                                                                                                                                                                                                                                                                                                                                                                                                                                                                                                                                                                                                                                                                                                                                                                                                                                                                                                                                                                                                                                                                                                                                                                                                                                                                                                                                                                                                                                                                                                                                                                                                                                                                                                                                          | 70.061 | 86.097  | 160.077               | 285.126          | 301.160                                           | 303.132                         | 361.181                    | 398.200 <sup>+2</sup>       | 427.217             | 502.240 | 603.279                            | 628.346                                                   | 632.312 <sup>+2</sup> | 654.313 <sup>+2</sup> | 668.309 | 686.334 | 759.983 | 783.373 | 791.415 | 817.368 | 831.411 | 898.151               | 922.474 | 1023.529 | 1238.601 |         |                       |                       |         |         |         |         |         |         |         |         |         |          |          |                         |      |      |      |      |      |      |      |      |      |      |      |       |      |      |      |      |      |      |       |      |      |      |      |      |      |                       |       |      |       |      |       |       |       |       |       |       |       |        |       |       |       |       |       |      |       |       |      |      |       |       |       |       |       |      |      |      |      |      |      |       |      |      |      |      |       |      |       |      |       |       |      |      |       |       |      |      |      |          |    |    |                       |    |      |    |                     |    |    |    |                                    |                     |    |                     |    |    |     |     |     |     |     |     |     |     |     |           |     |       |      |     |     |      |      |      |      |     |      |      |  |  |  |  |  |  |      |  |  |  |  |  |
| Frac. Inten. (% of TIC)                                                                                                                                                                                                                                                                                                                                                                                                                                                                                                                                                                                                                                                                                                                                                                                                                                                                                                                                                                                                                                                                                                                                                                                                                                                                                                                                                                                                                                                                                                                                                                                                                                                                                                                                                                                                                                                                                                                                                                                                                                                                                                                                                                                                                                                                                                                                                                                                                                                                                                                                                                                     | 2.17   | 0.24    | 2.79                  | 1.75             | 3.53                                              | 2.28                            | 5.03                       | 1.93                        | 2.26                | 3.01    | 4.02                               | 18.45                                                     | 2.68                  | 2.01                  | 6.67    | 4.93    | 2.21    | 1.78    | 13.10   | 2.70    | 1.74    | 1.74                  | 6.10    | 3.09     | 2.81     |         |                       |                       |         |         |         |         |         |         |         |         |         |          |          |                         |      |      |      |      |      |      |      |      |      |      |      |       |      |      |      |      |      |      |       |      |      |      |      |      |      |                       |       |      |       |      |       |       |       |       |       |       |       |        |       |       |       |       |       |      |       |       |      |      |       |       |       |       |       |      |      |      |      |      |      |       |      |      |      |      |       |      |       |      |       |       |      |      |       |       |      |      |      |          |    |    |                       |    |      |    |                     |    |    |    |                                    |                     |    |                     |    |    |     |     |     |     |     |     |     |     |     |           |     |       |      |     |     |      |      |      |      |     |      |      |  |  |  |  |  |  |      |  |  |  |  |  |
| Rel. Inten. (% of BP)                                                                                                                                                                                                                                                                                                                                                                                                                                                                                                                                                                                                                                                                                                                                                                                                                                                                                                                                                                                                                                                                                                                                                                                                                                                                                                                                                                                                                                                                                                                                                                                                                                                                                                                                                                                                                                                                                                                                                                                                                                                                                                                                                                                                                                                                                                                                                                                                                                                                                                                                                                                       | 11.75  | 1.32    | 15.13                 | 9.51             | 18.13                                             | 12.35                           | 32.16                      | 10.44                       | 12.24               | 16.34   | 21.80                              | 100.00                                                    | 16.14                 | 10.80                 | 36.18   | 26.74   | 11.97   | 9.53    | 71.04   | 14.85   | 9.44    | 9.41                  | 33.09   | 16.73    | 14.12    |         |                       |                       |         |         |         |         |         |         |         |         |         |          |          |                         |      |      |      |      |      |      |      |      |      |      |      |       |      |      |      |      |      |      |       |      |      |      |      |      |      |                       |       |      |       |      |       |       |       |       |       |       |       |        |       |       |       |       |       |      |       |       |      |      |       |       |       |       |       |      |      |      |      |      |      |       |      |      |      |      |       |      |       |      |       |       |      |      |       |       |      |      |      |          |    |    |                       |    |      |    |                     |    |    |    |                                    |                     |    |                     |    |    |     |     |     |     |     |     |     |     |     |           |     |       |      |     |     |      |      |      |      |     |      |      |  |  |  |  |  |  |      |  |  |  |  |  |
| Score                                                                                                                                                                                                                                                                                                                                                                                                                                                                                                                                                                                                                                                                                                                                                                                                                                                                                                                                                                                                                                                                                                                                                                                                                                                                                                                                                                                                                                                                                                                                                                                                                                                                                                                                                                                                                                                                                                                                                                                                                                                                                                                                                                                                                                                                                                                                                                                                                                                                                                                                                                                                       | -0.12  | 0.22    | 0.50                  | 0.50             | 0.50                                              | 0.75                            | 1.50                       | -0.10                       | 0.25                | 0.50    | 0.50                               | 1.50                                                      | -0.16                 | 0.50                  | -0.38   | 0.25    | -0.12   | -0.10   | 1.50    | 0.25    | -0.09   | -0.09                 | 1.50    | 1.50     | 1.50     |         |                       |                       |         |         |         |         |         |         |         |         |         |          |          |                         |      |      |      |      |      |      |      |      |      |      |      |       |      |      |      |      |      |      |       |      |      |      |      |      |      |                       |       |      |       |      |       |       |       |       |       |       |       |        |       |       |       |       |       |      |       |       |      |      |       |       |       |       |       |      |      |      |      |      |      |       |      |      |      |      |       |      |       |      |       |       |      |      |       |       |      |      |      |          |    |    |                       |    |      |    |                     |    |    |    |                                    |                     |    |                     |    |    |     |     |     |     |     |     |     |     |     |           |     |       |      |     |     |      |      |      |      |     |      |      |  |  |  |  |  |  |      |  |  |  |  |  |
| Ion-type                                                                                                                                                                                                                                                                                                                                                                                                                                                                                                                                                                                                                                                                                                                                                                                                                                                                                                                                                                                                                                                                                                                                                                                                                                                                                                                                                                                                                                                                                                                                                                                                                                                                                                                                                                                                                                                                                                                                                                                                                                                                                                                                                                                                                                                                                                                                                                                                                                                                                                                                                                                                    | LI     | a1      | SGGT-H <sub>2</sub> O | b2               | SGGT                                              | y3                              | b4-H <sub>2</sub> O        | b5                          | b6                  | y6      | y13-H <sub>2</sub> O <sup>+2</sup> | b7-H <sub>2</sub> O                                       | y7                    | b8-H <sub>2</sub> O   | y8      | y9      | y12     | y12     | y12     | y12     | y12     | y12                   | y12     | y12      | y12      |         |                       |                       |         |         |         |         |         |         |         |         |         |          |          |                         |      |      |      |      |      |      |      |      |      |      |      |       |      |      |      |      |      |      |       |      |      |      |      |      |      |                       |       |      |       |      |       |       |       |       |       |       |       |        |       |       |       |       |       |      |       |       |      |      |       |       |       |       |       |      |      |      |      |      |      |       |      |      |      |      |       |      |       |      |       |       |      |      |       |       |      |      |      |          |    |    |                       |    |      |    |                     |    |    |    |                                    |                     |    |                     |    |    |     |     |     |     |     |     |     |     |     |           |     |       |      |     |     |      |      |      |      |     |      |      |  |  |  |  |  |  |      |  |  |  |  |  |
| Delta ppm                                                                                                                                                                                                                                                                                                                                                                                                                                                                                                                                                                                                                                                                                                                                                                                                                                                                                                                                                                                                                                                                                                                                                                                                                                                                                                                                                                                                                                                                                                                                                                                                                                                                                                                                                                                                                                                                                                                                                                                                                                                                                                                                                                                                                                                                                                                                                                                                                                                                                                                                                                                                   | 9.0    | -19.1   | 20.2                  | 1.5              | 4.3                                               | -5.3                            | 36.1                       | 11.6                        | -4.3                | 7.5     | 10.4                               | 22.5                                                      |                       |                       |         |         |         |         | 10.9    |         |         |                       |         |          |          |         |                       |                       |         |         |         |         |         |         |         |         |         |          |          |                         |      |      |      |      |      |      |      |      |      |      |      |       |      |      |      |      |      |      |       |      |      |      |      |      |      |                       |       |      |       |      |       |       |       |       |       |       |       |        |       |       |       |       |       |      |       |       |      |      |       |       |       |       |       |      |      |      |      |      |      |       |      |      |      |      |       |      |       |      |       |       |      |      |       |       |      |      |      |          |    |    |                       |    |      |    |                     |    |    |    |                                    |                     |    |                     |    |    |     |     |     |     |     |     |     |     |     |           |     |       |      |     |     |      |      |      |      |     |      |      |  |  |  |  |  |  |      |  |  |  |  |  |

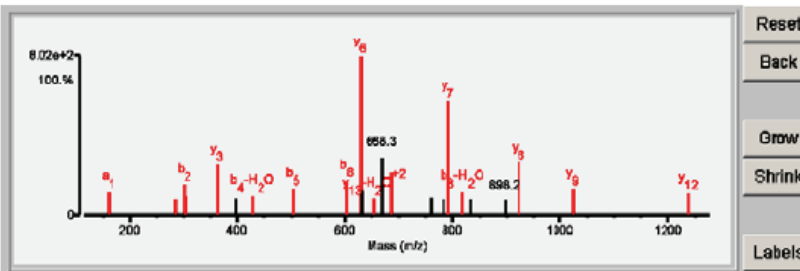

19

Detailed Results

| Rank | Score | SPI (%) | BCS | # Unmatched Ions | Sequence                                                                                                                                                                                                                                                 | MH* Calculated (Da) | MH* Error (Da) | MH* Error (ppm) | Protein MW/pI (Da) | Species | Accession #            | MS-Digest Index #     | Protein Name                                |
|------|-------|---------|-----|------------------|----------------------------------------------------------------------------------------------------------------------------------------------------------------------------------------------------------------------------------------------------------|---------------------|----------------|-----------------|--------------------|---------|------------------------|-----------------------|---------------------------------------------|
| 1    | 10.63 | 67.5    | 6   | 9/25             | (T)H <sup>+</sup> T <sup>+</sup> V <sup>+</sup> F <sup>+</sup> I <sup>+</sup> Y <sup>+</sup> E <sup>+</sup> G <sup>+</sup> /A <sup>+</sup> /L <sup>+</sup> P <sup>+</sup> H <sup>+</sup> A <sup>+</sup> I <sup>+</sup> L <sup>+</sup> R <sup>+</sup> (L) | 2038.0579           | 0.0179         | 8.8             | 41737.0/5.29       | HUMAN   | <a href="#">P60709</a> | <a href="#">10025</a> | Actin, cytoplasmic 1 - Homo sapiens (Human) |
| 1    | 10.63 | 67.5    | 6   | 9/25             | (T)H <sup>+</sup> T <sup>+</sup> V <sup>+</sup> F <sup>+</sup> I <sup>+</sup> Y <sup>+</sup> E <sup>+</sup> G <sup>+</sup> /A <sup>+</sup> /L <sup>+</sup> P <sup>+</sup> H <sup>+</sup> A <sup>+</sup> I <sup>+</sup> L <sup>+</sup> R <sup>+</sup> (L) | 2038.0579           | 0.0179         | 8.8             | 41793.1/5.31       | HUMAN   | <a href="#">P63261</a> | <a href="#">10123</a> | Actin, cytoplasmic 2 - Homo sapiens (Human) |

  

| Fragment-ion (m/z)      | 70.065 | 72.081 | 86.097 | 110.072 | 127.033 | 136.076 | 183.149 | 198.070 | 226.064                          | 235.117        | 309.103                      | 327.118                      | 353.728* <sup>2</sup>            | 364.732* <sup>2</sup>            | 380.174 | 408.175 | 432.237* <sup>2</sup> | 542.258* <sup>2</sup> | 563.806* <sup>2</sup> | 610.323* <sup>2</sup> | 631.804* <sup>2</sup> | 706.442        | 806.956* <sup>2</sup>         | 819.528        | 890.563        |
|-------------------------|--------|--------|--------|---------|---------|---------|---------|---------|----------------------------------|----------------|------------------------------|------------------------------|----------------------------------|----------------------------------|---------|---------|-----------------------|-----------------------|-----------------------|-----------------------|-----------------------|----------------|-------------------------------|----------------|----------------|
| Frac. Inten. (% of TIC) | 0.01   | 0.09   | 0.28   | 0.08    | 2.44    | 0.30    | 3.19    | 3.62    | 5.00                             | 3.15           | 9.50                         | 6.33                         | 3.59                             | 2.85                             | 3.31    | 5.90    | 2.67                  | 5.28                  | 3.19                  | 6.32                  | 3.24                  | 12.79          | 10.55                         | 3.37           | 2.95           |
| Rel. Inten. (% of BP)   | 0.08   | 0.68   | 2.17   | 0.66    | 19.11   | 2.35    | 24.94   | 28.33   | 39.08                            | 24.83          | 74.32                        | 49.54                        | 28.08                            | 22.27                            | 25.88   | 46.13   | 20.89                 | 41.29                 | 24.98                 | 49.44                 | 25.32                 | 100.00         | 82.50                         | 26.33          | 23.11          |
| Score                   | 0.20   | 0.50   | 0.22   | 1.00    | -0.19   | 1.00    | -0.25   | 0.50    | 0.50                             | 0.75           | 0.25                         | 0.50                         | 1.50                             | -0.22                            | -0.28   | 0.25    | -0.21                 | -0.41                 | -0.25                 | -0.49                 | -0.25                 | 1.50           | 1.50                          | 1.50           | 1.50           |
| Ion-type                | PR     | V      | LI     | H       | Y       | a1      | b1      | PH      | b <sub>2</sub> -H <sub>2</sub> O | b <sub>2</sub> | y <sub>6</sub> <sup>+2</sup> | y <sub>6</sub> <sup>+2</sup> | b <sub>3</sub> -H <sub>2</sub> O | b <sub>3</sub> -H <sub>2</sub> O |         |         |                       |                       |                       |                       |                       | y <sub>5</sub> | y <sub>14</sub> <sup>+2</sup> | y <sub>7</sub> | y <sub>8</sub> |
| Delta ppm               | 3.9    | 5.9    | 5.5    | 3.9     |         | 0.8     |         | -1.8    | -7.8                             | -12.1          | 1.3                          | 15.1                         | 17.6                             |                                  |         |         |                       |                       |                       |                       |                       | 9.0            | 12.0                          | 9.6            | 6.7            |

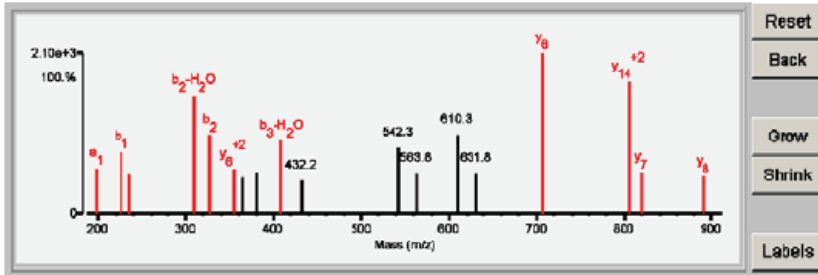

110

Detailed Results

| Rank | Score | SPI (%) | BCS | # Unmatched Ions | Sequence                                                                                                                                                                                                                                                                                              | MH* Calculated (Da) | MH* Error (Da) | MH* Error (ppm) | Protein MW/pI (Da) | Species | Accession #            | MS-Digest Index #     | Protein Name                                |
|------|-------|---------|-----|------------------|-------------------------------------------------------------------------------------------------------------------------------------------------------------------------------------------------------------------------------------------------------------------------------------------------------|---------------------|----------------|-----------------|--------------------|---------|------------------------|-----------------------|---------------------------------------------|
| 1    | 14.68 | 79.9    | 10  | 9/25             | (Y)A <sup>+</sup> N <sup>+</sup> T <sup>+</sup> V <sup>+</sup> L <sup>+</sup> I <sup>+</sup> S <sup>+</sup> I <sup>+</sup> G <sup>+</sup> /G <sup>+</sup> T <sup>+</sup> M <sup>+</sup> Y <sup>+</sup> /F <sup>+</sup> G <sup>+</sup> I <sup>+</sup> A <sup>+</sup> D <sup>+</sup> R <sup>+</sup> (M) | 1911.8939           | 0.0354         | 18.5            | 41737.0/5.29       | HUMAN   | <a href="#">P60709</a> | <a href="#">10025</a> | Actin, cytoplasmic 1 - Homo sapiens (Human) |
| 1    | 14.68 | 79.9    | 10  | 9/25             | (Y)A <sup>+</sup> N <sup>+</sup> T <sup>+</sup> V <sup>+</sup> L <sup>+</sup> I <sup>+</sup> S <sup>+</sup> I <sup>+</sup> G <sup>+</sup> /G <sup>+</sup> T <sup>+</sup> M <sup>+</sup> Y <sup>+</sup> /F <sup>+</sup> G <sup>+</sup> I <sup>+</sup> A <sup>+</sup> D <sup>+</sup> R <sup>+</sup> (M) | 1911.8939           | 0.0354         | 18.5            | 41793.1/5.31       | HUMAN   | <a href="#">P63261</a> | <a href="#">10123</a> | Actin, cytoplasmic 2 - Homo sapiens (Human) |

  

| Fragment-ion (m/z)      | 74.058 | 86.095 | 109.026 | 175.116 | 198.094                          | 357.123        | 361.185        | 375.141        | 442.189        | 456.197                          | 474.206        | 587.289        | 628.348        | 674.334        | 791.419        | 859.831* <sup>2</sup> | 900.336 | 972.485 | 1023.494       | 1181.570        | 1220.519        | 1238.626        | 1325.651        | 1438.721        | 1440.721 |
|-------------------------|--------|--------|---------|---------|----------------------------------|----------------|----------------|----------------|----------------|----------------------------------|----------------|----------------|----------------|----------------|----------------|-----------------------|---------|---------|----------------|-----------------|-----------------|-----------------|-----------------|-----------------|----------|
| Frac. Inten. (% of TIC) | 1.93   | 0.10   | 2.05    | 7.74    | 1.96                             | 5.41           | 2.32           | 3.40           | 2.10           | 8.50                             | 9.40           | 4.09           | 13.09          | 2.70           | 6.28           | 3.21                  | 2.04    | 2.27    | 3.72           | 2.67            | 2.34            | 3.24            | 4.60            | 2.60            | 2.25     |
| Rel. Inten. (% of BP)   | 14.73  | 0.74   | 15.83   | 59.12   | 14.86                            | 41.31          | 17.70          | 25.98          | 16.06          | 64.82                            | 71.81          | 31.23          | 100.00         | 20.65          | 47.98          | 24.54                 | 15.57   | 17.35   | 28.39          | 20.39           | 17.87           | 24.75           | 35.10           | 19.87           | 17.20    |
| Score                   | -0.15  | 0.22   | -0.16   | 1.50    | -0.15                            | 0.25           | 1.50           | 0.50           | -0.16          | 0.25                             | 0.50           | 1.50           | 1.50           | 0.50           | 1.50           | -0.25                 | -0.16   | -0.17   | 1.50           | 1.50            | -0.18           | 1.50            | 1.50            | 1.50            | -0.17    |
| Ion-type                | LI     | LI     | LI      | y1      | b <sub>3</sub> -H <sub>2</sub> O | y <sub>3</sub> | b <sub>3</sub> | b <sub>4</sub> | b <sub>4</sub> | b <sub>4</sub> -H <sub>2</sub> O | b <sub>4</sub> | b <sub>5</sub> | y <sub>6</sub> | b <sub>6</sub> | y <sub>7</sub> |                       |         |         | y <sub>9</sub> | y <sub>11</sub> | y <sub>12</sub> | y <sub>12</sub> | y <sub>13</sub> | y <sub>14</sub> |          |
| Delta ppm               |        | -20.0  |         | -16.9   |                                  | -2.6           | 6.3            | 18.2           |                | 9.6                              | 5.9            | 3.0            | 10.8           | 22.3           | 18.4           |                       |         |         | 0.7            | 7.2             |                 | 34.6            | 26.5            | 15.1            |          |

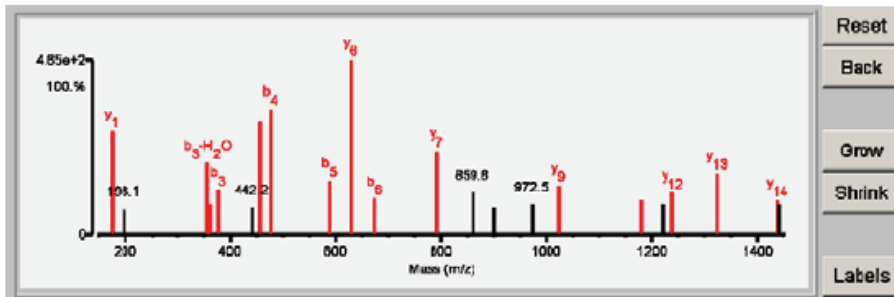

Detailed Results

| Rank | Score | SPI (%) | BCS | # Unmatched Ions | Sequence                                                                                                | MH <sup>+</sup> Calculated (Da) | MH <sup>+</sup> Error (Da) | MH <sup>+</sup> Error (ppm) | Protein MW (Da) | Species | Accession #  | MS-Digest Index #                          | Protein Name |
|------|-------|---------|-----|------------------|---------------------------------------------------------------------------------------------------------|---------------------------------|----------------------------|-----------------------------|-----------------|---------|--------------|--------------------------------------------|--------------|
| 1    | 19.25 | 78.6    | 12  | 6/25             | (R) Y S P H L L A N S K V E P I P W N Q A E G D L T P D E V V / A / L / V / Q / G / L / Q / E G E R (D) | 4679.2545                       | 0.0201                     | 4.3                         | 40764.75.63     | HUMAN   | P00813 11545 | Adenosine deaminase - Homo sapiens (Human) |              |

  

| Fragment-Ion (m/z)      | 70.066 | 72.081 | 86.096 | 175.120        | 413.199 | 441.189 | 458.726 <sup>+2</sup>        | 490.231        | 540.251 | 593.302 <sup>+2</sup>         | 618.274        | 731.376        | 788.390        | 886.924 <sup>+2</sup>         | 916.427        | 973.464        | 1072.533        | 1125.164 | 1133.633 | 1142.205 <sup>+3</sup> | 1150.560 | 1155.283 | 1256.686        | 1299.304 <sup>+3</sup> | 1562.707 |
|-------------------------|--------|--------|--------|----------------|---------|---------|------------------------------|----------------|---------|-------------------------------|----------------|----------------|----------------|-------------------------------|----------------|----------------|-----------------|----------|----------|------------------------|----------|----------|-----------------|------------------------|----------|
| Frac. Inten. (% of TIC) | 0.00   | 0.27   | 0.10   | 3.08           | 2.58    | 2.72    | 2.49                         | 4.49           | 2.55    | 3.23                          | 6.12           | 2.49           | 7.78           | 2.67                          | 5.55           | 16.85          | 8.18            | 3.95     | 5.01     | 2.84                   | 2.46     | 2.49     | 2.51            | 4.62                   | 2.94     |
| Rel. Inten. (% of BP)   | 0.01   | 1.44   | 0.53   | 16.35          | 13.71   | 14.41   | 13.20                        | 23.84          | 13.55   | 17.14                         | 32.44          | 13.21          | 41.25          | 14.17                         | 29.43          | 100.00         | 43.38           | 21.03    | 26.58    | 15.08                  | 13.07    | 13.22    | 13.33           | 24.49                  | 15.62    |
| Score                   | 0.20   | 0.50   | 0.22   | 1.50           | 0.50    | 0.75    | 1.50                         | 1.50           | 0.75    | 1.50                          | 1.50           | 1.50           | 1.50           | 0.50                          | 1.50           | 1.50           | 1.50            | -0.21    | -0.27    | -0.15                  | -0.13    | -0.13    | 1.50            | -0.24                  | 0.50     |
| Ion-type                | PR     | V      | LI     | y <sub>1</sub> | PDEV-28 | PDEV    | y <sub>8</sub> <sup>+2</sup> | y <sub>4</sub> | PDEVV   | y <sub>11</sub> <sup>+2</sup> | y <sub>5</sub> | y <sub>7</sub> | y <sub>8</sub> | b <sub>14</sub> <sup>+2</sup> | y <sub>5</sub> | y <sub>5</sub> | y <sub>10</sub> |          |          |                        |          |          | y <sub>12</sub> | b <sub>12</sub>        |          |
| Delta ppm               | 16.6   | 0.3    | -0.3   | 6.6            | -12.5   | -22.4   | -4.1                         | 10.6           | -31.3   | -21.6                         | -16.1          | 10.5           | 0.5            | -6.2                          | -23.6          | -5.6           | -5.3            |          |          |                        |          |          | 21.4            | -4.4                   |          |

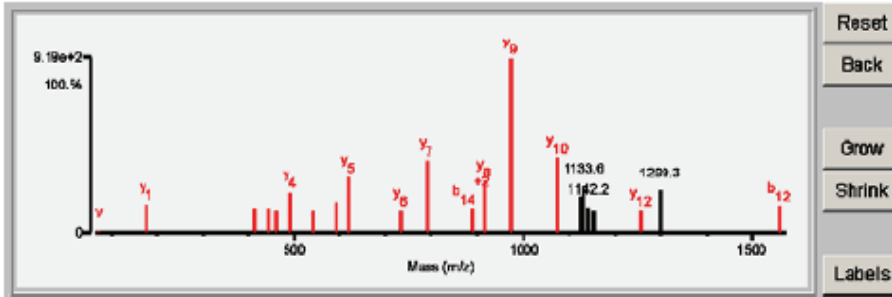

Detailed Results

| Rank | Score | SPI (%) | BCS | # Unmatched Ions | Sequence                                  | MH <sup>+</sup> Calculated (Da) | MH <sup>+</sup> Error (Da) | MH <sup>+</sup> Error (ppm) | Protein MW (Da) | Species | Accession #   | MS-Digest Index #                                                  | Protein Name |
|------|-------|---------|-----|------------------|-------------------------------------------|---------------------------------|----------------------------|-----------------------------|-----------------|---------|---------------|--------------------------------------------------------------------|--------------|
| 1    | 16.16 | 98.6    | 8   | 8/26             | (S) V P V A A I E P E Y / P E / G I R (A) | 1648.7814                       | 0.0071                     | 4.3                         | 28477.8/7.67    | HUMAN   | P54818 283716 | Adenylate kinase isoenzyme 2, mitochondrial - Homo sapiens (Human) |              |

  

| Fragment-Ion (m/z)      | 70.088 | 168.098 | 240.136 | 286.128        | 308.228 | 341.184        | 345.224        | 368.184 | 388.178        | 427.203                      | 647.776 <sup>+2</sup> | 815.447 | 884.364 <sup>+2</sup> | 885.332 <sup>+2</sup> | 705.389        | 731.893 <sup>+2</sup>         | 758.358 | 827.949 | 888.461        | 889.532 | 1001.488 | 1088.676 | 1094.548       | 1223.688       | 1294.826        |
|-------------------------|--------|---------|---------|----------------|---------|----------------|----------------|---------|----------------|------------------------------|-----------------------|---------|-----------------------|-----------------------|----------------|-------------------------------|---------|---------|----------------|---------|----------|----------|----------------|----------------|-----------------|
| Frac. Inten. (% of TIC) | 0.00   | 2.16    | 3.82    | 0.80           | 5.93    | 1.61           | 0.68           | 1.72    | 15.63          | 1.68                         | 2.00                  | 0.74    | 10.20                 | 6.24                  | 1.92           | 23.54                         | 0.71    | 0.77    | 0.73           | 3.99    | 1.51     | 0.76     | 10.50          | 1.78           | 0.88            |
| Rel. Inten. (% of BP)   | 0.00   | 9.17    | 16.24   | 3.40           | 25.17   | 6.82           | 2.91           | 7.30    | 66.39          | 7.14                         | 8.49                  | 3.15    | 43.31                 | 26.52                 | 8.17           | 100.00                        | 3.02    | 3.27    | 3.09           | 15.26   | 6.82     | 3.23     | 44.60          | 7.55           | 3.74            |
| Score                   | 0.20   | 0.75    | 0.75    | 0.50           | -0.25   | 0.50           | 1.50           | 0.50    | 0.75           | 0.50                         | 1.50                  | -0.03   | -0.43                 | -0.27                 | 1.50           | 1.50                          | -0.03   | -0.03   | 1.50           | -0.15   | -0.07    | -0.03    | 1.50           | 1.50           | 1.50            |
| Ion-type                | PR     | PA      | PAA     | b <sub>2</sub> | AAEP-28 | y <sub>8</sub> | b <sub>8</sub> | AAEP    | b <sub>4</sub> | y <sub>8</sub> <sup>+2</sup> |                       |         |                       |                       | y <sub>5</sub> | y <sub>12</sub> <sup>+2</sup> |         |         | y <sub>8</sub> |         |          |          | y <sub>8</sub> | y <sub>6</sub> | y <sub>10</sub> |
| Delta ppm               | 5.3    | -3.9    | -1.5    | -0.1           |         | 1.9            | -1.4           | -3.0    | -0.2           | 2.0                          | 0.3                   |         |                       |                       | 3.2            | 2.2                           |         |         | 1.7            |         |          |          | 1.2            | -0.0           | 0.0             |

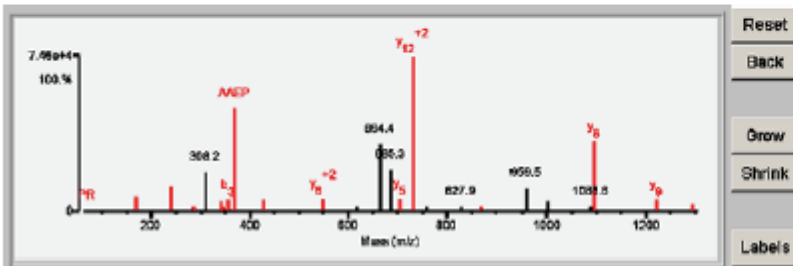

I13

Detailed Results

| Rank | Score | SPI (%) | BCS | # Unmatched Ions | Sequence               | MH <sup>+</sup> Calculated (Da) | MH <sup>+</sup> Error (Da) | MH <sup>+</sup> Error (ppm) | Protein MW pI (Da) | Species | Accession # | MS-Digest Index # | Protein Name                         |
|------|-------|---------|-----|------------------|------------------------|---------------------------------|----------------------------|-----------------------------|--------------------|---------|-------------|-------------------|--------------------------------------|
| 1    | 17.10 | 84.8    | 8   | 4/24             | (W) G/V(M) V/S/N/R (8) | 873.4070                        | 0.0030                     | 3.4                         | 47199.2/7.01       | HUMAN   | P08733      | 184185            | Alpha-enolase - Homo sapiens (Human) |
| 1    | 17.10 | 84.8    | 8   | 4/24             | (W) G/V(M) V/S/N/R (8) | 873.4070                        | 0.0030                     | 3.4                         | 46867.1/7.68       | HUMAN   | P13828      | 184209            | Beta-enolase - Homo sapiens (Human)  |
| 1    | 17.10 | 84.8    | 8   | 4/24             | (W) G/V(M) V/S/N/R (8) | 873.4070                        | 0.0030                     | 3.4                         | 47288.8/4.81       | HUMAN   | P09104      | 184229            | Gamma-enolase - Homo sapiens (Human) |

  

| Fragment-ion (m/z)      | 72.081 | 73.084 | 88.086 | 104.083 | 110.070 | 143.119 | 168.097 | 176.118 | 203.120 | 217.100 | 226.097 | 231.115 | 246.086 | 308.168*2 | 312.178 | 316.196*2 | 384.697*2 | 378.136 | 382.182 | 398.210 | 480.285 | 488.280 | 612.287 | 628.318 |
|-------------------------|--------|--------|--------|---------|---------|---------|---------|---------|---------|---------|---------|---------|---------|-----------|---------|-----------|-----------|---------|---------|---------|---------|---------|---------|---------|
| Frac. Inten. (% of TIC) | 0.79   | 1.30   | 1.09   | 12.04   | 0.03    | 0.80    | 1.39    | 6.69    | 3.28    | 1.19    | 1.27    | 1.08    | 6.71    | 0.85      | 1.87    | 4.07      | 1.38      | 3.85    | 1.25    | 14.96   | 1.66    | 16.86   | 0.37    | 14.83   |
| Rel. Inten. (% of BP)   | 4.70   | 7.71   | 6.46   | 71.43   | 0.20    | 4.77    | 8.25    | 39.65   | 19.43   | 7.08    | 7.53    | 6.40    | 39.81   | 5.02      | 11.07   | 24.14     | 8.16      | 22.83   | 7.39    | 88.71   | 9.83    | 100.00  | 5.77    | 86.79   |
| Score                   | 0.50   | -0.08  | -0.05  | -0.71   | 1.00    | -0.05   | 0.50    | 1.50    | 0.50    | 0.50    | 0.75    | 0.50    | 0.50    | 0.50      | 1.50    | 1.50      | 0.50      | 0.50    | 0.50    | 1.50    | 0.50    | 1.50    | 0.50    | 1.50    |
| Ion-type                | V      | V      | V      | V       | H       | H       | Y1-NH3  | Y1      | MV-29   | Y1      | Y1      | MV      | b2      | Y5-H2O*2  | Y2      | Y5*2      | Y3        | Y3-NH3  | Y3      | Y4-H2O  | Y4      | Y5-NH3  | Y5      | Y5      |
| Delta ppm               | 5.5    |        |        |         | -9.8    |         | 29.1    | -3.7    | -12.6   | -7.5    | -11.6   | -9.4    | -7.5    | -4.7      | 3.3     | 7.2       | -0.1      | -4.8    | -4.8    | 1.0     | -6.5    | 2.6     | 8.4     | -1.9    |

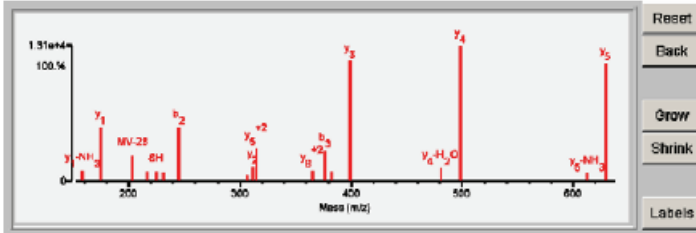

I14

Detailed Results

| Rank | Score | SPI (%) | BCS | # Unmatched Ions | Sequence                  | MH <sup>+</sup> Calculated (Da) | MH <sup>+</sup> Error (Da) | MH <sup>+</sup> Error (ppm) | Protein MW pI (Da) | Species | Accession # | MS-Digest Index # | Protein Name                                              |
|------|-------|---------|-----|------------------|---------------------------|---------------------------------|----------------------------|-----------------------------|--------------------|---------|-------------|-------------------|-----------------------------------------------------------|
| 1    | 13.74 | 78.8    | 5   | 9/24             | (R) A V F/P/S/I V G/R (P) | 1033.5499                       | -0.0026                    | -2.5                        | 121364.2/5.83      | HUMAN   | Q6S8J3      | 2499              | ANKRD26-like family C member 1A - Homo sapiens (Human)    |
| 1    | 13.74 | 78.8    | 5   | 9/24             | (R) A V F/P/S/I V G/R (P) | 1033.5499                       | -0.0026                    | -2.5                        | 121371.3/5.86      | HUMAN   | A6A3E0      | 2501              | ANKRD26-like family C member 1B - Homo sapiens (Human)    |
| 1    | 13.74 | 78.8    | 5   | 9/24             | (R) A V F/P/S/I V G/R (P) | 1033.5499                       | -0.0026                    | -2.5                        | 42009.2/5.24       | HUMAN   | P62736      | 9969              | Actin, aortic smooth muscle - Homo sapiens (Human)        |
| 1    | 13.74 | 78.8    | 5   | 9/24             | (R) A V F/P/S/I V G/R (P) | 1033.5499                       | -0.0026                    | -2.5                        | 41737.0/5.29       | HUMAN   | P60709      | 10025             | Actin, cytoplasmic 1 - Homo sapiens (Human)               |
| 1    | 13.74 | 78.8    | 5   | 9/24             | (R) A V F/P/S/I V G/R (P) | 1033.5499                       | -0.0026                    | -2.5                        | 42019.2/5.23       | HUMAN   | P68032      | 10091             | Actin, alpha cardiac muscle 1 - Homo sapiens (Human)      |
| 1    | 13.74 | 78.8    | 5   | 9/24             | (R) A V F/P/S/I V G/R (P) | 1033.5499                       | -0.0026                    | -2.5                        | 41793.1/5.31       | HUMAN   | P63261      | 10123             | Actin, cytoplasmic 2 - Homo sapiens (Human)               |
| 1    | 13.74 | 78.8    | 5   | 9/24             | (R) A V F/P/S/I V G/R (P) | 1033.5499                       | -0.0026                    | -2.5                        | 41877.1/5.31       | HUMAN   | P63267      | 10161             | Actin, gamma-enteric smooth muscle - Homo sapiens (Human) |
| 1    | 13.74 | 78.8    | 5   | 9/24             | (Q) A V F/P/S/I V G/R (P) | 1033.5499                       | -0.0026                    | -2.5                        | 42016.5/5.91       | HUMAN   | Q9BYX7      | 10171             | Kappa-actin - Homo sapiens (Human)                        |
| 1    | 13.74 | 78.8    | 5   | 9/24             | (R) A V F/P/S/I V G/R (P) | 1033.5499                       | -0.0026                    | -2.5                        | 42051.3/5.23       | HUMAN   | P68133      | 10383             | Actin, alpha skeletal muscle - Homo sapiens (Human)       |

  

| Fragment-ion (m/z)      | 70.066 | 71.082 | 72.081 | 84.080 | 86.097 | 94.067 | 112.084 | 120.080 | 156.078 | 167.087 | 175.118 | 185.096 | 259.114 | 314.692*2 | 388.226*2 | 400.227 | 427.248 | 444.295 | 471.743 | 474.898 | 531.326 | 628.374 | 775.451 | 793.837 |
|-------------------------|--------|--------|--------|--------|--------|--------|---------|---------|---------|---------|---------|---------|---------|-----------|-----------|---------|---------|---------|---------|---------|---------|---------|---------|---------|
| Frac. Inten. (% of TIC) | 0.01   | 2.84   | 0.65   | 2.00   | 0.37   | 2.25   | 0.07    | 0.49    | 2.74    | 1.99    | 5.82    | 3.72    | 7.37    | 11.28     | 3.92      | 2.84    | 1.88    | 3.35    | 2.16    | 2.19    | 7.04    | 27.59   | 6.16    | 2.26    |
| Rel. Inten. (% of BP)   | 0.03   | 10.29  | 2.35   | 7.24   | 1.35   | 8.15   | 0.26    | 1.79    | 9.64    | 7.20    | 21.11   | 13.49   | 26.73   | 40.88     | 14.22     | 10.29   | 6.83    | 12.13   | 7.82    | 7.94    | 25.53   | 100.00  | 16.72   | 8.20    |
| Score                   | 0.20   | -0.10  | 0.50   | -0.07  | 0.22   | -0.08  | 0.33    | 1.00    | -0.10   | 0.50    | 0.75    | 0.50    | 0.50    | 1.50      | 1.50      | -0.10   | -0.07   | 1.50    | -0.08   | -0.08   | 1.50    | 1.50    | 1.50    | -0.08   |
| Ion-type                | V      | V      | V      | V      | L1     | R      | F       | PS-H2O  | Y1      | F       | Y1      | PS      | b2      | y6*2      | y7*2      | Y4      | Y4      | Y4      | Y4      | Y4      | Y5      | Y6      | Y7      | Y7      |
| Delta ppm               | 9.6    |        | -1.0   |        | 10.2   |        | -28.8   | -7.3    |         | 23.3    | -4.9    | 14.2    | 8.5     | -1.2      | -2.5      |         |         | 4.5     |         |         | 2.6     | -8.3    | 5.7     |         |

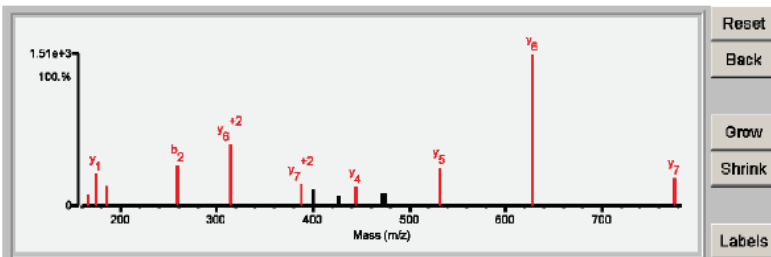

# I15

## Detailed Results

| Rank | Score | SP1 (%) | BCS | # Unmatched ions | Sequence                    | MH <sup>+</sup> Calculated (Da) | MH <sup>+</sup> Error (Da) | MH <sup>+</sup> Error (ppm) | Protein MW (Da) | Species | Accession #            | MS-Digest Index #     | Protein Name                                              |
|------|-------|---------|-----|------------------|-----------------------------|---------------------------------|----------------------------|-----------------------------|-----------------|---------|------------------------|-----------------------|-----------------------------------------------------------|
| 1    | 18.48 | 81.8    | 9   | 5/26             | (S) YVRLIPDGGQVLI/I/G/R (F) | 1781.8682                       | 0.0001                     | 0.1                         | 121384.2/5.83   | HUMAN   | <a href="#">Q888J3</a> | <a href="#">2488</a>  | ANKRD26-like family C member 1A - Homo sapiens (Human)    |
| 1    | 18.48 | 81.8    | 9   | 5/26             | (S) YVRLIPDGGQVLI/I/G/R (F) | 1781.8682                       | 0.0001                     | 0.1                         | 121371.3/5.88   | HUMAN   | <a href="#">A6A9E0</a> | <a href="#">2501</a>  | ANKRD26-like family C member 1B - Homo sapiens (Human)    |
| 1    | 18.48 | 81.8    | 9   | 5/26             | (S) YVRLIPDGGQVLI/I/G/R (F) | 1781.8682                       | 0.0001                     | 0.1                         | 42008.2/5.24    | HUMAN   | <a href="#">P82738</a> | <a href="#">9888</a>  | Actin, aortic smooth muscle - Homo sapiens (Human)        |
| 1    | 18.48 | 81.8    | 9   | 5/26             | (S) YVRLIPDGGQVLI/I/G/R (F) | 1781.8682                       | 0.0001                     | 0.1                         | 42003.4/5.28    | HUMAN   | <a href="#">Q662R1</a> | <a href="#">9885</a>  | Beta-actin-like protein 2 - Homo sapiens (Human)          |
| 1    | 18.48 | 81.8    | 9   | 5/26             | (S) YVRLIPDGGQVLI/I/G/R (F) | 1781.8682                       | 0.0001                     | 0.1                         | 41737.0/5.28    | HUMAN   | <a href="#">P80708</a> | <a href="#">10026</a> | Actin, cytoplasmic 1 - Homo sapiens (Human)               |
| 1    | 18.48 | 81.8    | 9   | 5/26             | (S) YVRLIPDGGQVLI/I/G/R (F) | 1781.8682                       | 0.0001                     | 0.1                         | 42018.2/5.23    | HUMAN   | <a href="#">P88032</a> | <a href="#">10081</a> | Actin, alpha cardiac muscle 1 - Homo sapiens (Human)      |
| 1    | 18.48 | 81.8    | 9   | 5/26             | (S) YVRLIPDGGQVLI/I/G/R (F) | 1781.8682                       | 0.0001                     | 0.1                         | 41783.1/5.31    | HUMAN   | <a href="#">P88281</a> | <a href="#">10123</a> | Actin, cytoplasmic 2 - Homo sapiens (Human)               |
| 1    | 18.48 | 81.8    | 9   | 5/26             | (S) YVRLIPDGGQVLI/I/G/R (F) | 1781.8682                       | 0.0001                     | 0.1                         | 41877.1/5.31    | HUMAN   | <a href="#">P88287</a> | <a href="#">10181</a> | Actin, gamma-enteric smooth muscle - Homo sapiens (Human) |
| 1    | 18.48 | 81.8    | 9   | 5/26             | (S) YVRLIPDGGQVLI/I/G/R (F) | 1781.8682                       | 0.0001                     | 0.1                         | 42016.6/5.81    | HUMAN   | <a href="#">Q8BYX7</a> | <a href="#">10171</a> | Kappa-actin - Homo sapiens (Human)                        |
| 1    | 18.48 | 81.8    | 9   | 5/26             | (S) YVRLIPDGGQVLI/I/G/R (F) | 1781.8682                       | 0.0001                     | 0.1                         | 42051.3/5.23    | HUMAN   | <a href="#">P88133</a> | <a href="#">10383</a> | Actin, alpha skeletal muscle - Homo sapiens (Human)       |

  

| Fragment-Ion (m/z)      | 88.098 | 102.056 | 187.105 | 224.070 | 262.087 | 346.125 | 381.111 | 398.188 | 418.197 | 488.186 | 475.224 | 480.206 | 484.182 | 487.238 | 508.186 | 688.303 | 807.252 | 810.218 | 848.844 <sup>+2</sup> | 888.355 | 708.388 <sup>+2</sup> | 802.438 | 801.614 | 890.428 | 1288.882 |
|-------------------------|--------|---------|---------|---------|---------|---------|---------|---------|---------|---------|---------|---------|---------|---------|---------|---------|---------|---------|-----------------------|---------|-----------------------|---------|---------|---------|----------|
| Frac. Inten. (% of TIC) | 0.04   | 0.04    | 3.17    | 1.37    | 4.24    | 0.82    | 12.81   | 3.35    | 0.97    | 0.22    | 9.42    | 0.77    | 3.18    | 1.39    | 2.45    | 2.15    | 0.90    | 1.94    | 15.95                 | 8.02    | 4.58                  | 3.72    | 1.46    | 3.33    | 12.32    |
| Rel. Inten. (% of BP)   | 0.22   | 0.21    | 16.68   | 8.05    | 25.03   | 4.85    | 74.37   | 19.75   | 5.74    | 4.83    | 55.55   | 4.53    | 18.74   | 8.18    | 14.48   | 12.56   | 5.30    | 11.47   | 100.00                | 47.33   | 27.02                 | 21.52   | 8.63    | 19.63   | 72.85    |
| Score                   | 0.22   | 1.00    | -0.19   | 0.50    | 0.50    | -0.05   | 0.50    | 0.75    | 1.50    | 0.50    | -0.05   | 0.50    | 0.75    | -0.14   | 1.50    | -0.05   | -0.05   | 1.50    | 1.50                  | 1.50    | 1.50                  | 1.50    | 0.50    | 1.50    | 1.50     |
| Ion-type                | LI     | E       |         | a1      | b1      |         | b2      | PDGG    | ys      | as      | ys      | bs      | PDGGV   |         | ys      |         | PDGGVI  |         | y1 <sup>+2</sup>      | ys      | y13 <sup>+2</sup>     | y7      | ys      | b5      | y12      |
| Delta ppm               | -8.4   | -4.5    |         | -23.1   | -13.4   |         | -2.8    | -4.1    | -16.7   | -30.5   | -4.3    |         | -8.8    | 5.4     |         | -11.4   |         | -3.1    | 7.7                   | -3.6    | 7.2                   | -5.2    | 4.4     | 1.3     | -6.3     |

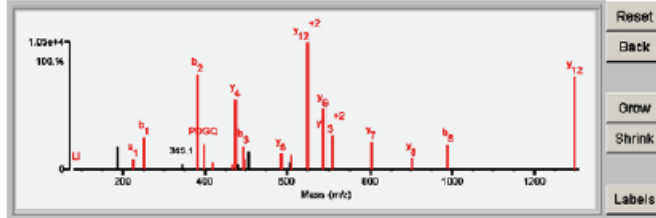

# I16

## Detailed Results

| Rank | Score | SP1 (%) | BCS | # Unmatched ions | Sequence                    | MH <sup>+</sup> Calculated (Da) | MH <sup>+</sup> Error (Da) | MH <sup>+</sup> Error (ppm) | Protein MW (Da) | Species | Accession #            | MS-Digest Index #     | Protein Name                                           |
|------|-------|---------|-----|------------------|-----------------------------|---------------------------------|----------------------------|-----------------------------|-----------------|---------|------------------------|-----------------------|--------------------------------------------------------|
| 1    | 10.08 | 62.8    | 4   | 11/26            | (W) H H T F I Y H R/L/R (V) | 1304.6841                       | 0.0028                     | 2.1                         | 121984.2/5.83   | HUMAN   | <a href="#">Q888J3</a> | <a href="#">2488</a>  | ANKRD26-like family C member 1A - Homo sapiens (Human) |
| 1    | 10.08 | 62.8    | 4   | 11/26            | (W) H H T F I Y H R/L/R (V) | 1304.6841                       | 0.0028                     | 2.1                         | 121971.3/5.88   | HUMAN   | <a href="#">A6A9E0</a> | <a href="#">2501</a>  | ANKRD26-like family C member 1B - Homo sapiens (Human) |
| 1    | 10.08 | 62.8    | 4   | 11/26            | (W) H H T F I Y H R/L/R (V) | 1304.6841                       | 0.0028                     | 2.1                         | 41737.0/5.28    | HUMAN   | <a href="#">P80708</a> | <a href="#">10026</a> | Actin, cytoplasmic 1 - Homo sapiens (Human)            |
| 1    | 10.08 | 62.8    | 4   | 11/26            | (W) H H T F I Y H R/L/R (V) | 1304.6841                       | 0.0028                     | 2.1                         | 42018.2/5.23    | HUMAN   | <a href="#">P88032</a> | <a href="#">10081</a> | Actin, alpha cardiac muscle 1 - Homo sapiens (Human)   |
| 1    | 10.08 | 62.8    | 4   | 11/26            | (W) H H T F I Y H R/L/R (V) | 1304.6841                       | 0.0028                     | 2.1                         | 41783.1/5.31    | HUMAN   | <a href="#">P88281</a> | <a href="#">10123</a> | Actin, cytoplasmic 2 - Homo sapiens (Human)            |
| 1    | 10.08 | 62.8    | 4   | 11/26            | (W) H H T F I Y H R/L/R (V) | 1304.6841                       | 0.0028                     | 2.1                         | 42016.6/5.81    | HUMAN   | <a href="#">Q8BYX7</a> | <a href="#">10171</a> | Kappa-actin - Homo sapiens (Human)                     |
| 1    | 10.08 | 62.8    | 4   | 11/26            | (W) H H T F I Y H R/L/R (V) | 1304.6841                       | 0.0028                     | 2.1                         | 42051.3/5.23    | HUMAN   | <a href="#">P88133</a> | <a href="#">10383</a> | Actin, alpha skeletal muscle - Homo sapiens (Human)    |

  

| Fragment-Ion (m/z)      | 80.048 | 70.088 | 72.080 | 88.097 | 110.071 | 120.080 | 138.075 | 137.077 | 176.119 | 186.182 | 238.122 | 271.179 | 275.120 | 288.208 | 282.122 | 308.123 <sup>+2</sup> | 340.162 | 347.887 <sup>+2</sup> | 368.184 <sup>+3</sup> | 383.208 | 488.742 <sup>+2</sup> | 614.280 | 631.287 | 858.302 | 884.368 |
|-------------------------|--------|--------|--------|--------|---------|---------|---------|---------|---------|---------|---------|---------|---------|---------|---------|-----------------------|---------|-----------------------|-----------------------|---------|-----------------------|---------|---------|---------|---------|
| Frac. Inten. (% of TIC) | 4.86   | 0.00   | 2.63   | 0.46   | 0.24    | 0.37    | 0.64    | 2.71    | 9.87    | 3.36    | 4.71    | 2.83    | 4.29    | 6.51    | 4.38    | 3.01                  | 11.40   | 2.53                  | 2.64                  | 3.08    | 5.17                  | 3.48    | 15.14   | 2.69    | 2.92    |
| Rel. Inten. (% of BP)   | 32.07  | 0.02   | 17.39  | 3.05   | 1.59    | 2.45    | 4.20    | 17.90   | 65.18   | 22.21   | 31.09   | 19.70   | 28.31   | 43.68   | 28.82   | 19.87                 | 75.28   | 16.72                 | 17.40                 | 20.33   | 34.16                 | 23.00   | 100.00  | 17.80   | 15.29   |
| Score                   | 0.20   | 0.20   | -0.17  | 0.22   | 1.00    | 1.00    | 1.00    | -0.18   | 1.50    | -0.22   | 0.75    | 0.50    | -0.28   | 1.50    | -0.28   | 0.50                  | -0.75   | 1.50                  | 1.50                  | -0.17   | -0.20                 | -0.34   | 0.50    | 1.50    | -0.18   |
| Ion-type                | PR     | LI     |        | H      | F       | Y       | Y       | HT      | ys-NH   |         | ys      | ys      |         | ys      |         | bs <sup>+2</sup>      |         | ys <sup>+2</sup>      |                       | ys-NHs  |                       | ys      | ys      | ys      | ys      |
| Delta ppm               |        | 5.3    |        | 0.9    | -5.2    | -7.3    | -5.8    |         | -0.3    |         | 27.8    | -13.9   |         | 16.6    |         | -3.0                  |         | -35.3                 |                       |         |                       | -4.4    | -2.3    |         | 8.7     |

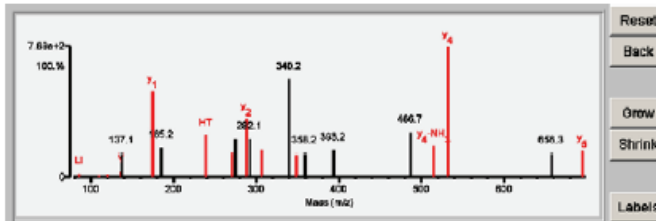





119

Detailed Results

| Rank | Score | SPI (%) | BCS | # Unmatched Ions | Sequence                                    | MH <sup>+</sup> Calculated (Da) | MH <sup>+</sup> Error (Da) | MH <sup>+</sup> Error (ppm) | Protein MW (Da) | Species | Accession # | MS-Digest Index # | Protein Name                                                |
|------|-------|---------|-----|------------------|---------------------------------------------|---------------------------------|----------------------------|-----------------------------|-----------------|---------|-------------|-------------------|-------------------------------------------------------------|
| 1    | 10.27 | 61.7    | 7   | 10/25            | (R) D V F E T V N V N F I I N / Q N L R (T) | 1905.9276                       | 0.0144                     | 7.5                         | 21994.8/5.27    | HUMAN   | P55957      | 54843             | BH3-interacting domain death agonist - Homo sapiens (Human) |

  

| Fragment-ion (m/z)      | 70.066 | 72.080 | 86.096 | 87.056 | 110.071 | 120.080 | 175.123 | 187.106 | 442.216 <sup>+2</sup> | 478.265 | 530.304 | 590.313 <sup>+2</sup> | 600.273 | 609.302 <sup>+2</sup> | 627.324 | 644.345 | 655.320 | 683.317 | 742.445 | 757.437 | 789.329 | 888.381 | 954.520 | 1002.439 | 1149.501 |
|-------------------------|--------|--------|--------|--------|---------|---------|---------|---------|-----------------------|---------|---------|-----------------------|---------|-----------------------|---------|---------|---------|---------|---------|---------|---------|---------|---------|----------|----------|
| Frac. Inten. (% of TIC) | 0.01   | 0.27   | 0.75   | 0.13   | 0.09    | 0.41    | 2.99    | 3.23    | 2.83                  | 3.49    | 2.49    | 8.84                  | 2.45    | 3.57                  | 3.39    | 25.78   | 2.30    | 3.13    | 3.02    | 7.69    | 2.99    | 2.21    | 5.49    | 7.73     | 5.06     |
| Rel. Inten. (% of BP)   | 0.03   | 1.06   | 2.92   | 0.51   | 0.36    | 1.57    | 10.45   | 12.53   | 10.98                 | 13.53   | 9.68    | 34.34                 | 9.50    | 13.87                 | 13.17   | 100.00  | 8.94    | 12.16   | 11.71   | 29.84   | 11.80   | 8.58    | 21.30   | 30.00    | 19.63    |
| Score                   | 0.20   | 0.50   | 0.22   | 0.33   | 1.00    | 1.00    | 1.50    | -0.13   | -0.11                 | -0.14   | 1.50    | -0.34                 | -0.09   | -0.14                 | 0.50    | 1.50    | -0.09   | -0.12   | -0.12   | 1.50    | 0.50    | 0.50    | -0.21   | 0.50     | 0.50     |
| Ion-type                | PR     | V      | LI     | NR     | H       | F       | y1      |         |                       |         | y4      |                       |         | y5-NH3                | y5      |         |         |         |         | y6      | b6      | b7      |         | b8       | b9       |
| Delta ppm               | 15.3   | -5.2   | -2.8   | 11.6   | -0.7    | -4.8    | 20.3    |         |                       |         | -1.0    |                       |         |                       | 5.1     | -3.8    |         |         |         | 7.8     | 5.4     | -14.0   |         | 3.1      | -3.3     |

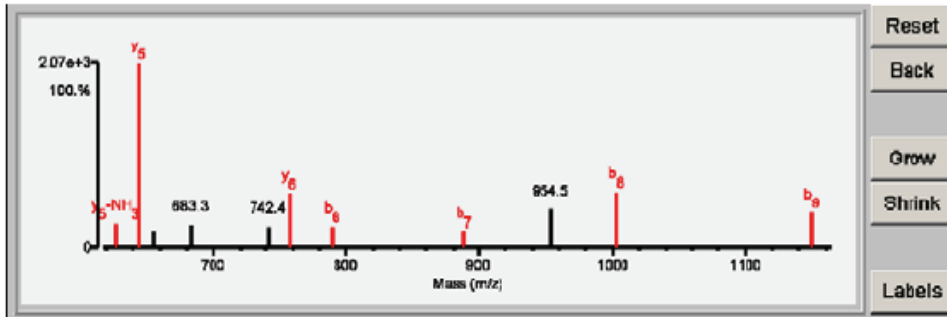

120

Detailed Results

| Rank | Score | SPI (%) | BCS | # Unmatched Ions | Sequence                                                      | MH <sup>+</sup> Calculated (Da) | MH <sup>+</sup> Error (Da) | MH <sup>+</sup> Error (ppm) | Protein MW (Da) | Species | Accession # | MS-Digest Index # | Protein Name                                   |
|------|-------|---------|-----|------------------|---------------------------------------------------------------|---------------------------------|----------------------------|-----------------------------|-----------------|---------|-------------|-------------------|------------------------------------------------|
| 1    | 15.21 | 78.6    | 8   | 7/26             | (I) L G G V I I S A I V E A A A Q / Y / W / P E / P P P R (T) | 2422.2071                       | 0.0038                     | 1.6                         | 28316.8/6.06    | HUMAN   | P04832      | 104127            | Calpain small subunit 1 - Homo sapiens (Human) |

  

| Fragment-ion (m/z)      | 72.082 | 88.086 | 118.088 | 138.077 | 174.090 | 282.171 | 282.870 | 318.134 | 324.218 | 387.203 | 396.206 <sup>+2</sup> | 415.188 | 466.320 | 488.278 | 528.278 | 582.263 | 583.326 | 587.319 <sup>+2</sup> | 688.340 | 788.434 | 790.430 <sup>+2</sup> | 798.433 | 863.482 | 1004.501 | 1088.517 |
|-------------------------|--------|--------|---------|---------|---------|---------|---------|---------|---------|---------|-----------------------|---------|---------|---------|---------|---------|---------|-----------------------|---------|---------|-----------------------|---------|---------|----------|----------|
| Frac. Inten. (% of TIC) | 0.08   | 0.14   | 2.98    | 0.07    | 2.96    | 5.26    | 2.13    | 10.11   | 2.40    | 4.55    | 2.73                  | 12.17   | 6.05    | 2.36    | 4.85    | 2.62    | 11.47   | 1.52                  | 3.56    | 5.27    | 3.40                  | 2.01    | 5.83    | 1.95     | 3.11     |
| Rel. Inten. (% of BP)   | 0.67   | 1.18   | 24.51   | 0.56    | 24.33   | 43.25   | 17.49   | 83.08   | 19.71   | 37.45   | 22.44                 | 100.00  | 49.70   | 19.40   | 39.90   | 21.55   | 94.24   | 15.77                 | 29.29   | 43.35   | 27.94                 | 16.51   | 47.95   | 16.04    | 25.59    |
| Score                   | 0.50   | 0.22   | -0.25   | 1.00    | 0.50    | 1.50    | -0.17   | 0.50    | -0.20   | 0.50    | 1.50                  | 0.50    | -0.50   | 1.50    | 0.50    | -0.22   | 1.50    | -0.16                 | 0.25    | 1.50    | -0.28                 | 0.50    | 1.50    | 1.50     | 1.50     |
| Ion-type                | V      | LI     |         | Y       | a1      | y++5    |         | b9      |         | a4      | y7 <sup>+2</sup>      | b4      |         | y4      | b5      |         | y5      |                       | b7-H2O  | y7      |                       | b8      | y6      | y++19    | y6       |
| Delta ppm               | 14.2   | -17.7  |         | 13.3    | -35.1   | 5.9     |         | 1.4     |         | -11.2   | -27.4                 | -8.3    |         | 3.6     | -13.7   |         | -6.4    |                       | -6.4    | -2.0    |                       | -8.5    | -6.4    | -9.4     | -14.1    |

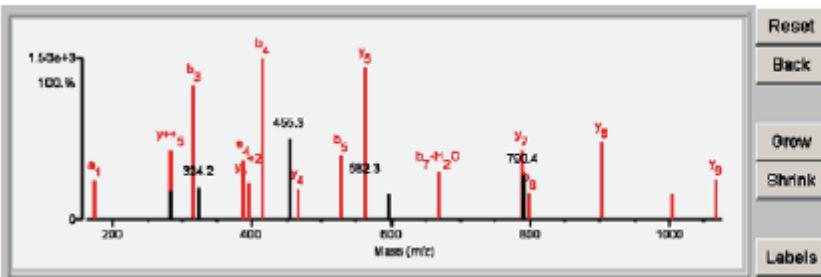



I21

Detailed Results

| Rank                    | Score  | SPI (%) | BCS    | # Unmatched Ions | Sequence                | MH <sup>+</sup> Calculated (Da) | MH <sup>+</sup> Error (Da) | MH <sup>+</sup> Error (ppm) | Protein MW/pI (Da) | Species | Accession # | MS-Digest Index # | Protein Name                                                              |                       |                       |         |                       |                       |                       |         |         |         |         |         |         |
|-------------------------|--------|---------|--------|------------------|-------------------------|---------------------------------|----------------------------|-----------------------------|--------------------|---------|-------------|-------------------|---------------------------------------------------------------------------|-----------------------|-----------------------|---------|-----------------------|-----------------------|-----------------------|---------|---------|---------|---------|---------|---------|
| 1                       | 18.11  | 88.8    | 8      | 526              | (L)LIYIGITQ/I/D/L/R (D) | 1102.6826                       | -0.0044                    | -4.0                        | 21810.716.77       | HUMAN   | P80963      | 74107             | Cell division control protein 42 homolog precursor - Homo sapiens (Human) |                       |                       |         |                       |                       |                       |         |         |         |         |         |         |
| Fragment-Ion (m/z)      | 70.084 | 72.081  | 73.085 | 84.080           | 88.086                  | 94.088                          | 120.078                    | 174.082                     | 175.119            | 202.090 | 288.202     | 301.168           | 368.178                                                                   | 384.208 <sup>+2</sup> | 382.717 <sup>+2</sup> | 403.225 | 433.738 <sup>+2</sup> | 442.254 <sup>+2</sup> | 461.263 <sup>+2</sup> | 518.312 | 644.385 | 745.422 | 784.431 | 802.437 | 801.514 |
| Frac. Inten. (% of TIC) | 0.00   | 0.67    | 1.71   | 1.78             | 0.27                    | 1.96                            | 2.24                       | 5.35                        | 3.95               | 1.96    | 8.40        | 5.75              | 3.12                                                                      | 2.09                  | 5.43                  | 3.38    | 2.52                  | 5.55                  | 5.40                  | 4.65    | 4.40    | 3.22    | 4.88    | 18.21   | 2.02    |
| Rel. Inten. (% of BP)   | 0.01   | 3.68    | 9.40   | 9.78             | 1.46                    | 10.75                           | 12.27                      | 29.40                       | 21.68              | 10.73   | 46.12       | 31.56             | 17.11                                                                     | 11.50                 | 29.81                 | 18.57   | 13.84                 | 35.58                 | 29.64                 | 25.52   | 24.16   | 17.68   | 26.78   | 100.00  | 11.09   |
| Score                   | 0.20   | 0.50    | -0.09  | -0.10            | 0.22                    | -0.11                           | -0.12                      | 0.50                        | 1.50               | 0.50    | 1.50        | 0.50              | 0.50                                                                      | 0.75                  | 0.50                  | 1.50    | -0.14                 | 0.50                  | 1.50                  | 1.50    | 1.50    | 1.50    | 0.50    | 1.50    | 1.50    |
| Ion-type                | PR     | V       |        |                  | LI                      |                                 |                            | a1                          | y1                 | b1      | y2          | b2                | b3                                                                        | y6+H2O <sup>+2</sup>  | y7+H2O <sup>+2</sup>  | y8      |                       | y8+H2O <sup>+2</sup>  | y8 <sup>+2</sup>      | y4      | y5      | y6      | y7+H2O  | y7      | y8      |
| Delta ppm               | -13.2  | 3.1     |        |                  | -0.3                    |                                 |                            | -21.3                       | -2.6               | -5.1    | -3.9        | -11.1             | -5.9                                                                      | -16.2                 | -4.7                  | -13.0   |                       | 2.2                   | -12.7                 | -4.9    | -11.6   | 2.8     | -0.2    | -5.8    | 3.8     |
|                         |        |         |        |                  |                         |                                 |                            |                             |                    |         |             |                   |                                                                           | VGTGIDL <sup>+2</sup> |                       |         |                       |                       |                       |         |         |         |         |         |         |

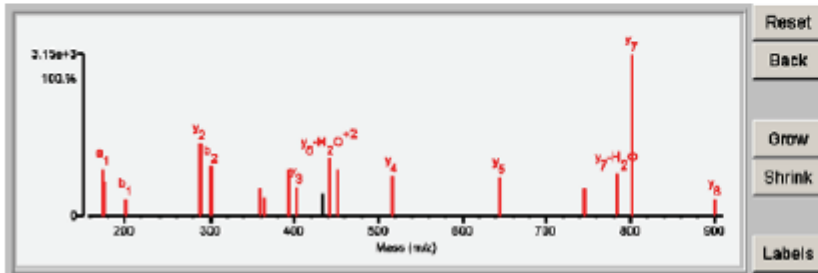

I22

Detailed Results

| Rank                    | Score  | SPI (%) | BCS     | # Unmatched Ions | Sequence                                 | MH <sup>+</sup> Calculated (Da) | MH <sup>+</sup> Error (Da) | MH <sup>+</sup> Error (ppm) | Protein MW/pI (Da) | Species | Accession # | MS-Digest Index # | Protein Name                                       |                       |                       |                       |         |                       |                       |                       |                       |                       |                       |                       |                        |
|-------------------------|--------|---------|---------|------------------|------------------------------------------|---------------------------------|----------------------------|-----------------------------|--------------------|---------|-------------|-------------------|----------------------------------------------------|-----------------------|-----------------------|-----------------------|---------|-----------------------|-----------------------|-----------------------|-----------------------|-----------------------|-----------------------|-----------------------|------------------------|
| 1                       | 10.37  | 55.4    | 5       | 1025             | (K)YVRIKIR/P E E F F Y R E V L D R R (V) | 2396.1261                       | 0.0015                     | 0.6                         | 20811.515.22       | HUMAN   | Q13185      | 89015             | Chromobox protein homolog 3 - Homo sapiens (Human) |                       |                       |                       |         |                       |                       |                       |                       |                       |                       |                       |                        |
| Fragment-Ion (m/z)      | 72.081 | 86.096  | 102.055 | 160.076          | 188.072                                  | 201.082                         | 241.072                    | 259.092                     | 312.121            | 317.115 | 331.124     | 446.159           | 517.185                                            | 584.291 <sup>+3</sup> | 806.443 <sup>+2</sup> | 829.429 <sup>+2</sup> | 883.947 | 872.962 <sup>+2</sup> | 875.957 <sup>+2</sup> | 908.487 <sup>+2</sup> | 929.467 <sup>+2</sup> | 940.472 <sup>+2</sup> | 973.005 <sup>+2</sup> | 975.995 <sup>+2</sup> | 1040.535 <sup>+2</sup> |
| Frac. Inten. (% of TIC) | 0.05   | 0.11    | 0.13    | 2.58             | 2.48                                     | 2.28                            | 1.16                       | 4.65                        | 2.34               | 4.88    | 1.36        | 5.19              | 3.41                                               | 3.16                  | 15.65                 | 2.02                  | 1.22    | 7.98                  | 13.06                 | 5.64                  | 1.49                  | 5.42                  | 4.71                  | 5.61                  | 2.41                   |
| Rel. Inten. (% of BP)   | 0.33   | 0.69    | 0.82    | 16.49            | 15.82                                    | 14.58                           | 7.44                       | 29.72                       | 14.97              | 31.19   | 8.71        | 33.14             | 21.80                                              | 20.22                 | 100.00                | 12.91                 | 7.78    | 50.99                 | 83.48                 | 42.45                 | 9.53                  | 34.67                 | 30.10                 | 35.83                 | 15.40                  |
| Score                   | 0.50   | 0.22    | 1.00    | 0.50             | 0.50                                     | 0.75                            | -0.07                      | 0.75                        | -0.09              | 0.50    | 0.50        | 1.50              | -1.00                                              | -0.13                 | -0.08                 | -0.51                 |         | -0.51                 | 1.50                  | -0.42                 | -0.10                 | 1.50                  | -0.30                 | 1.50                  | 1.50                   |
| Ion-type                | V      | LI      | E       | a1               | b1                                       | AE                              |                            | EE                          | b2                 | b3      | b4          |                   |                                                    | y13 <sup>+3</sup>     |                       |                       |         | y13 <sup>+2</sup>     |                       |                       |                       | y14 <sup>+2</sup>     |                       | y15 <sup>+2</sup>     | y15 <sup>+2</sup>      |
| Delta ppm               | 3.1    | -10.8   | -1.5    | -26.0            | -15.3                                    | -30.2                           |                            | -8.4                        | -9.0               | -2.6    | -24.3       |                   |                                                    | -20.6                 |                       |                       |         | 7.4                   |                       |                       |                       | -0.2                  |                       | 4.2                   | 22.0                   |

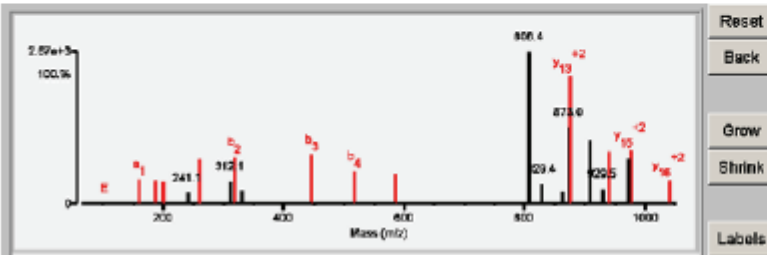

123

Detailed Results

| Rank                    | Score  | SPI (%) | BCS    | # Unmatched Ions | Sequence                                    | MH <sup>+</sup> Calculated (Da) | MH <sup>+</sup> Error (Da) | MH <sup>+</sup> Error (ppm) | Protein MW (kDa) | Species               | Accession #            | MS-Digest Index #     | Protein Name                                                     |         |                       |                       |                       |                       |                       |                       |                       |                       |                       |                       |                       |
|-------------------------|--------|---------|--------|------------------|---------------------------------------------|---------------------------------|----------------------------|-----------------------------|------------------|-----------------------|------------------------|-----------------------|------------------------------------------------------------------|---------|-----------------------|-----------------------|-----------------------|-----------------------|-----------------------|-----------------------|-----------------------|-----------------------|-----------------------|-----------------------|-----------------------|
| 1                       | 14.86  | 76.4    | 7      | 825              | (V) A I R / R / A / A D / R R / P R / R (R) | 1388.9861                       | 0.0072                     | 5.2                         | 25835.49.54      | HUMAN                 | <a href="#">Q98CT7</a> | <a href="#">89381</a> | Coiled-coil domain-containing protein 124 - Homo sapiens (Human) |         |                       |                       |                       |                       |                       |                       |                       |                       |                       |                       |                       |
| Fragment-ion (m/z)      | 70.088 | 72.081  | 84.043 | 102.054          | 110.071                                     | 132.049                         | 160.044                    | 175.118                     | 201.108          | 347.690 <sup>+2</sup> | 354.845 <sup>+3</sup>  | 388.162               | 391.210                                                          | 397.895 | 398.521 <sup>+3</sup> | 401.215 <sup>+2</sup> | 403.888 <sup>+5</sup> | 440.721 <sup>+2</sup> | 467.173 <sup>+2</sup> | 478.242 <sup>+2</sup> | 531.799 <sup>+2</sup> | 540.758 <sup>+2</sup> | 596.277 <sup>+2</sup> | 597.284 <sup>+2</sup> | 605.280 <sup>+2</sup> |
| Frac. inten. (% of TIC) | 0.00   | 3.51    | 0.11   | 0.22             | 0.12                                        | 7.32                            | 4.96                       | 4.00                        | 2.75             | 8.04                  | 1.97                   | 2.02                  | 1.95                                                             | 6.37    | 2.47                  | 4.58                  | 3.51                  | 3.90                  | 1.99                  | 11.30                 | 3.30                  | 12.77                 | 2.81                  | 1.88                  | 11.64                 |
| Rel. inten. (% of BP)   | 0.02   | 27.49   | 0.84   | 1.71             | 0.95                                        | 67.28                           | 38.04                      | 31.53                       | 21.53            | 47.32                 | 15.42                  | 15.83                 | 15.29                                                            | 42.04   | 19.93                 | 35.89                 | 27.47                 | 30.58                 | 15.80                 | 85.48                 | 25.83                 | 100.00                | 20.47                 | 13.00                 | 91.14                 |
| Score                   | 0.20   | -0.27   |        | 1.00             | 1.00                                        | 0.50                            | 0.50                       | 1.50                        | 1.50             | 0.50                  | -0.16                  | -0.15                 | -0.42                                                            | -0.19   | -0.36                 |                       | 1.50                  | 1.50                  | -0.16                 | 1.50                  | 0.50                  | 1.50                  | 0.50                  | -0.13                 | 1.50                  |
| Ion-type                | PR     | V       | E      | E                | H                                           | a1                              | b1                         | y1                          | yH+3             | y5 <sup>+2</sup>      | y9-H2O <sup>+3</sup>   |                       |                                                                  |         |                       |                       | y10 <sup>+3</sup>     | y7 <sup>+2</sup>      |                       | y8 <sup>+2</sup>      | y9-H2O <sup>+2</sup>  | y9 <sup>+2</sup>      | y10-H2O <sup>+2</sup> |                       | y10 <sup>+2</sup>     |
| Delta ppm               | 5.3    |         |        | -12.3            | -4.3                                        | 2.6                             | -0.5                       | -5.4                        | -11.9            |                       | 11.9                   |                       |                                                                  |         |                       |                       | 18.6                  | -4.6                  |                       | 1.3                   | 3.4                   | 5.4                   | -2.4                  |                       | -8.3                  |

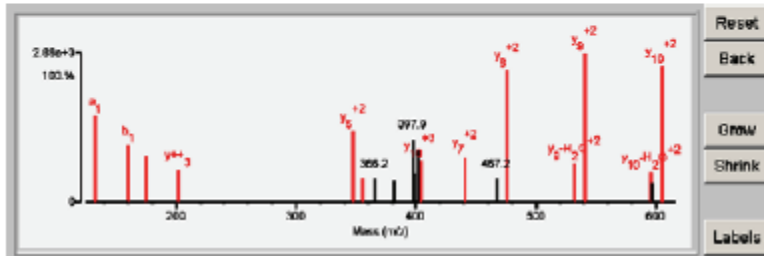

124

Detailed Results

| Rank                    | Score  | SPI (%) | BCS    | # Unmatched Ions | Sequence                                        | MH <sup>+</sup> Calculated (Da) | MH <sup>+</sup> Error (Da) | MH <sup>+</sup> Error (ppm) | Protein MW (kDa) | Species | Accession #            | MS-Digest Index #     | Protein Name                                                     |         |                       |                       |                  |                       |                       |                       |                       |                       |                       |                       |                       |                   |
|-------------------------|--------|---------|--------|------------------|-------------------------------------------------|---------------------------------|----------------------------|-----------------------------|------------------|---------|------------------------|-----------------------|------------------------------------------------------------------|---------|-----------------------|-----------------------|------------------|-----------------------|-----------------------|-----------------------|-----------------------|-----------------------|-----------------------|-----------------------|-----------------------|-------------------|
| 1                       | 19.80  | 95.8    | 8      | 325              | (S) T I A I R / R / A / A D / R R / P R / R (R) | 1467.6645                       | 0.0026                     | 1.8                         | 25835.49.54      | HUMAN   | <a href="#">Q98CT7</a> | <a href="#">89381</a> | Coiled-coil domain-containing protein 124 - Homo sapiens (Human) |         |                       |                       |                  |                       |                       |                       |                       |                       |                       |                       |                       |                   |
| Fragment-ion (m/z)      | 70.088 | 72.081  | 84.043 | 102.054          | 160.078                                         | 161.080                         | 173.092                    | 175.118                     | 188.073          | 201.088 | 259.168                | 347.692 <sup>+2</sup> | 357.851 <sup>+3</sup>                                            | 401.210 | 427.537 <sup>+3</sup> | 440.719 <sup>+2</sup> | 478.240          | 531.754 <sup>+2</sup> | 540.763 <sup>+2</sup> | 596.286 <sup>+2</sup> | 605.285 <sup>+2</sup> | 622.791 <sup>+2</sup> | 631.798 <sup>+2</sup> | 640.801 <sup>+2</sup> | 642.313 <sup>+2</sup> |                   |
| Frac. inten. (% of TIC) | 0.00   | 0.18    | 0.03   | 0.03             | 14.96                                           | 1.33                            | 1.82                       | 3.05                        | 4.95             | 1.72    | 1.04                   | 4.51                  | 1.38                                                             | 1.73    | 5.97                  | 1.12                  | 2.78             | 1.85                  | 7.98                  | 1.54                  | 8.92                  | 1.32                  | 2.33                  | 27.00                 | 1.57                  |                   |
| Rel. inten. (% of BP)   | 0.00   | 0.65    | 0.11   | 0.12             | 53.65                                           | 4.75                            | 6.51                       | 10.92                       | 17.75            | 6.15    | 3.74                   | 16.18                 | 4.96                                                             | 6.20    | 21.39                 | 4.02                  | 9.90             | 6.62                  | 28.59                 | 5.51                  | 31.97                 | 4.73                  | 8.36                  | 100.00                | 5.64                  |                   |
| Score                   | 0.20   | 0.53    |        | 1.00             | 0.50                                            | -0.05                           | 0.50                       | 1.50                        | 0.50             | 0.75    | 0.50                   | 1.50                  | 0.50                                                             | 1.50    | 1.50                  | 1.50                  | 0.50             | 1.50                  | 0.50                  | 1.50                  | 0.50                  | 0.50                  | -0.05                 | 0.50                  | 1.50                  | -0.08             |
| Ion-type                | PR     | V       | E      | E                | a1                                              | EA-28                           | y1                         | y11 <sup>+3</sup>           | y1               | b1      | EA                     | b2                    |                                                                  |         |                       |                       | y7 <sup>+2</sup> | yH+3                  |                       | y9-H2O <sup>+2</sup>  | y9 <sup>+2</sup>      | y10-H2O <sup>+2</sup> | y10 <sup>+2</sup>     | y11-H2O <sup>+2</sup> |                       | y11 <sup>+2</sup> |
| Delta ppm               | 15.3   | 5.9     |        | -10.3            | -11.0                                           |                                 | -9.0                       | -7.7                        | -10.0            | -1.4    | -16.5                  | 2.8                   | -8.5                                                             | -10.0   | -1.8                  | -8.5                  | -2.3             | -6.8                  | 1.1                   | 10.7                  | 1.2                   |                       | 1.7                   |                       | -1.8                  |                   |

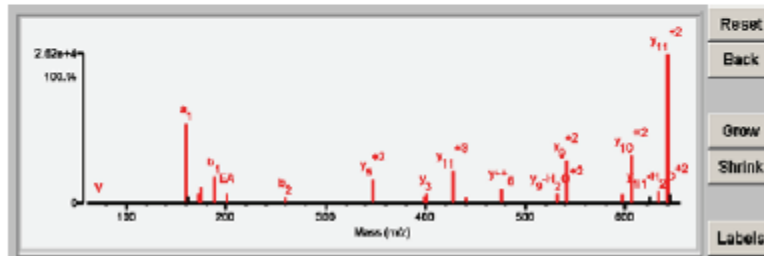

Detailed Results

| Rank | Score | SPI (%) | BCS | # Unmatched Ions | Sequence                                | MH <sup>+</sup> Calculated (Da) | MH <sup>+</sup> Error (Da) | MH <sup>+</sup> Error (ppm) | Protein MWpl (Da) | Species | Accession # | MS-Digest Index # | Protein Name                                                                           |
|------|-------|---------|-----|------------------|-----------------------------------------|---------------------------------|----------------------------|-----------------------------|-------------------|---------|-------------|-------------------|----------------------------------------------------------------------------------------|
| 1    | 15.17 | 75.2    | 9   | 6/25             | (S) E V T D A I K V V P D F S E Y R (R) | 1829.7986                       | 0.0124                     | 6.8                         | 30815.5/9.04      | HUMAN   | P0C7P4      | 678539            | Cytochrome b-c1 complex subunit Rieske-like protein 1 - Homo sapiens (Human)           |
| 1    | 15.17 | 75.2    | 9   | 6/25             | (S) E V T D A I K V V P D F S E Y R (R) | 1829.7986                       | 0.0124                     | 6.8                         | 29668.1/8.55      | HUMAN   | P47985      | 678563            | Cytochrome b-c1 complex subunit Rieske, mitochondrial precursor - Homo sapiens (Human) |

  

| Fragment-ion (m/z)      | 70.065 | 72.081 | 84.080 | 86.099 | 94.066 | 110.073 | 116.049 | 120.085 | 143.064 | 175.115 | 198.070 | 226.067 | 338.180 | 409.671 <sup>+2</sup> | 424.115             | 442.137 | 448.190 <sup>+2</sup>             | 457.212 <sup>+2</sup> | 527.233 | 537.252 | 554.247 | 701.331 | 725.271 | 816.357 | 913.403 |
|-------------------------|--------|--------|--------|--------|--------|---------|---------|---------|---------|---------|---------|---------|---------|-----------------------|---------------------|---------|-----------------------------------|-----------------------|---------|---------|---------|---------|---------|---------|---------|
| Frac. Inten. (% of TIC) | 0.01   | 0.33   | 2.04   | 0.09   | 5.74   | 0.06    | 1.85    | 0.07    | 2.94    | 2.73    | 2.49    | 3.33    | 3.55    | 2.78                  | 3.58                | 8.69    | 2.50                              | 8.71                  | 3.67    | 1.94    | 5.82    | 9.49    | 10.32   | 3.10    | 14.19   |
| Rel. Inten. (% of BP)   | 0.04   | 2.33   | 14.41  | 0.80   | 40.49  | 0.40    | 13.01   | 0.51    | 20.69   | 19.25   | 17.54   | 23.44   | 24.99   | 19.59                 | 25.24               | 61.24   | 17.59                             | 61.36                 | 25.90   | 13.68   | 41.00   | 66.92   | 72.75   | 21.83   | 100.00  |
| Score                   | 0.20   | 0.50   | -0.14  | 0.22   | -0.40  | 1.00    | -0.13   | 1.00    | -0.21   | 1.50    | 0.50    | 0.50    | 1.50    | 0.50                  | 0.25                | 0.50    | 1.50                              | 0.75                  | -0.14   | 1.50    | 1.50    | -0.73   | 1.50    | 1.50    | 1.50    |
| Ion-type                | PR     | V      |        | LI     |        | H       |         | F       |         | y1      | a1      | b1      | y2      | b5 <sup>+2</sup>      | b3-H <sub>2</sub> O | b3      | y7-H <sub>2</sub> O <sup>+2</sup> | y7 <sup>+2</sup>      | a4      |         | y4      | y5      | y6      | y7      |         |
| Delta ppm               | -0.4   | 5.9    |        | 33.4   |        | 19.3    |         | 36.8    |         | -23.1   | -3.3    |         | 6.8     | -7.9                  |                     |         | -23.4                             | 11.9                  | 6.6     |         | -17.3   | 7.4     |         | 5.8     | -2.4    |
|                         |        |        |        |        |        |         |         |         |         |         |         |         |         |                       |                     |         |                                   |                       | FSEY    |         |         |         |         |         |         |
|                         |        |        |        |        |        |         |         |         |         |         |         |         |         |                       |                     |         |                                   |                       | 34.3    |         |         |         |         |         |         |

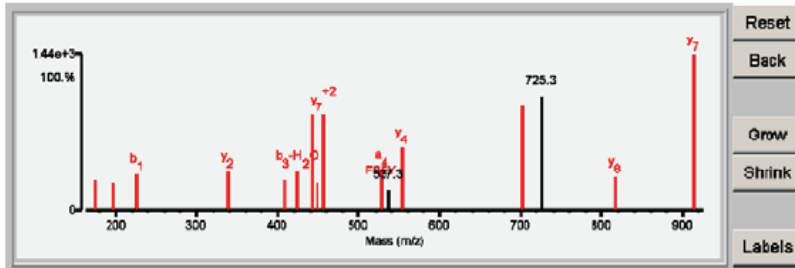

Detailed Results

| Rank | Score | SPI (%) | BCS | # Unmatched Ions | Sequence                                                | MH <sup>+</sup> Calculated (Da) | MH <sup>+</sup> Error (Da) | MH <sup>+</sup> Error (ppm) | Protein MWpl (Da) | Species | Accession # | MS-Digest Index # | Protein Name                                            |
|------|-------|---------|-----|------------------|---------------------------------------------------------|---------------------------------|----------------------------|-----------------------------|-------------------|---------|-------------|-------------------|---------------------------------------------------------|
| 1    | 12.02 | 56.8    | 5   | 9/25             | (S) Q G W V L P E O K I V P H T V I P V I G I D A R (M) | 2675.3473                       | 0.0140                     | 5.2                         | 82764.9/9.36      | HUMAN   | Q9NQZ3      | 126217            | Deleted in azoospermia protein 1 - Homo sapiens (Human) |
| 1    | 12.02 | 56.8    | 5   | 9/25             | (S) Q G W V L P E O K I V P H T V I P V I G I D A R (M) | 2675.3473                       | 0.0140                     | 5.2                         | 82764.9/9.36      | HUMAN   | Q9NQZ3      | 126217            | Deleted in azoospermia protein 1 - Homo sapiens (Human) |
| 1    | 12.02 | 56.8    | 5   | 9/25             | (S) Q G W V L P E O K I V P H T V I P V I G I D A R (M) | 2675.3473                       | 0.0140                     | 5.2                         | 82764.9/9.36      | HUMAN   | Q9NQZ3      | 126217            | Deleted in azoospermia protein 1 - Homo sapiens (Human) |
| 1    | 12.02 | 56.8    | 5   | 9/25             | (S) Q G W V L P E O K I V P H T V I P V I G I D A R (M) | 2675.3473                       | 0.0140                     | 5.2                         | 63132.0/8.84      | HUMAN   | Q13117      | 126219            | Deleted in azoospermia protein 2 - Homo sapiens (Human) |
| 1    | 12.02 | 56.8    | 5   | 9/25             | (S) Q G W V L P E O K I V P H T V I P V I G I D A R (M) | 2675.3473                       | 0.0140                     | 5.2                         | 54988.9/8.90      | HUMAN   | Q9NR90      | 126221            | Deleted in azoospermia protein 3 - Homo sapiens (Human) |
| 1    | 12.02 | 56.8    | 5   | 9/25             | (S) Q G W V L P E O K I V P H T V I P V I G I D A R (M) | 2675.3473                       | 0.0140                     | 5.2                         | 64785.3/9.23      | HUMAN   | Q86SG3      | 126223            | Deleted in azoospermia protein 4 - Homo sapiens (Human) |
| 1    | 12.02 | 56.8    | 5   | 9/25             | (S) Q G W V L P E O K I V P H T V I P V I G I D A R (M) | 2675.3473                       | 0.0140                     | 5.2                         | 64785.3/9.23      | HUMAN   | Q86SG3      | 126223            | Deleted in azoospermia protein 4 - Homo sapiens (Human) |

  

| Fragment-ion (m/z)      | 72.081 | 86.096 | 102.053 | 120.079 | 175.115 | 200.139 | 226.121 | 228.133 | 243.135 | 304.161 | 330.133 | 488.249 | 531.289 | 588.310 | 651.797 <sup>+2</sup> | 687.352 | 715.375 | 735.377 | 815.384 | 834.446 | 921.475            | 1044.543           | 1068.544 | 1139.580 | 1221.620 <sup>+2</sup>            |
|-------------------------|--------|--------|---------|---------|---------|---------|---------|---------|---------|---------|---------|---------|---------|---------|-----------------------|---------|---------|---------|---------|---------|--------------------|--------------------|----------|----------|-----------------------------------|
| Frac. Inten. (% of TIC) | 0.07   | 0.24   | 0.07    | 0.10    | 3.90    | 4.88    | 3.50    | 2.29    | 2.29    | 3.05    | 2.42    | 3.48    | 2.30    | 11.64   | 2.31                  | 5.68    | 17.62   | 2.09    | 5.73    | 10.04   | 2.49               | 7.08               | 2.66     | 2.00     |                                   |
| Rel. Inten. (% of BP)   | 0.41   | 1.34   | 0.38    | 0.58    | 22.11   | 27.71   | 19.89   | 12.99   | 13.00   | 17.29   | 13.75   | 19.75   | 13.07   | 66.09   | 11.65                 | 13.14   | 32.23   | 100.00  | 11.86   | 32.54   | 56.99              | 14.15              | 40.20    | 15.08    | 11.36                             |
| Score                   | 0.50   | 0.22   | 1.00    | 1.00    | 1.50    | 0.50    | -0.20   | 0.75    | -0.13   | 0.75    | -0.14   | -0.20   | 1.50    | 1.50    | -0.12                 | 1.50    | 0.75    | -1.00   | -0.12   | 1.50    | 0.50               | -0.40              | -0.15    | 0.50     |                                   |
| Ion-type                | V      | LI     | E       | F       | y1      | GGI-28  |         | GGI     |         | FVG     |         | y5      | y6      |         | PNTV FVG              | y7      |         |         |         | y6      | b <sup>++</sup> 15 | b <sup>++</sup> 17 |          |          | y22-NH <sub>3</sub> <sup>+2</sup> |
| Delta ppm               | 4.5    | -7.3   | -17.2   | -14.8   | -4.9    | -6.2    |         | -9.5    |         | -17.8   |         | 0.7     |         |         | -35.0                 |         |         |         |         | -1.4    | 16.3               | 10.1               |          |          | -12.7                             |
|                         |        |        |         |         |         |         |         |         |         |         |         |         |         |         | KIVPN                 |         |         |         |         |         |                    |                    |          |          |                                   |
|                         |        |        |         |         |         |         |         |         |         |         |         |         |         |         | -19.6                 |         |         |         |         |         |                    |                    |          |          |                                   |

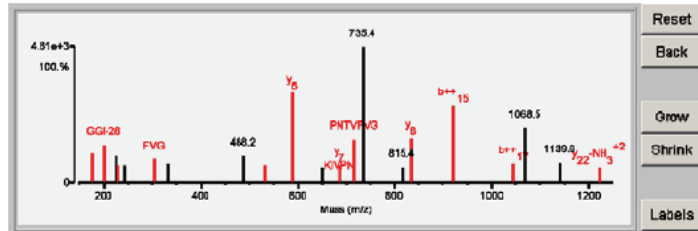

127

Detailed Results

| Rank | Score | SPI (%) | BCS | # Unmatched Ions | Sequence                             | MH <sup>+</sup> Calculated (Da) | MH <sup>+</sup> Error (Da) | MH <sup>+</sup> Error (ppm) | Protein MWipl (Da) | Species | Accession #            | MS-Digest Index #      | Protein Name                                                      |
|------|-------|---------|-----|------------------|--------------------------------------|---------------------------------|----------------------------|-----------------------------|--------------------|---------|------------------------|------------------------|-------------------------------------------------------------------|
| 1    | 13.31 | 82.4    | 4   | 8/25             | (S)N I I P / F / I T V / P L S R (T) | 1344.7344                       | 0.0001                     | 0.1                         | 87302.8/6.66       | HUMAN   | <a href="#">P54886</a> | <a href="#">398275</a> | Delta-1-pyrroline-5-carboxylate synthetase - Homo sapiens (Human) |

  

| Fragment-ion (m/z)      | 70.066 | 72.080 | 84.079 | 86.096 | 120.083 | 173.129 | 187.068 | 201.119 | 217.133 | 218.142 | 245.128 | 246.133 | 316.137 | 358.209 | 455.257 | 459.263 | 472.291 | 496.778 <sup>+2</sup> | 515.306 <sup>+2</sup> | 544.277 <sup>+2</sup> | 571.365 <sup>+2</sup> | 619.425 | 785.491 | 932.542 | 1029.610 |
|-------------------------|--------|--------|--------|--------|---------|---------|---------|---------|---------|---------|---------|---------|---------|---------|---------|---------|---------|-----------------------|-----------------------|-----------------------|-----------------------|---------|---------|---------|----------|
| Frac. Inten. (% of TIC) | 0.01   | 0.10   | 1.95   | 0.84   | 0.05    | 1.88    | 1.74    | 2.34    | 7.20    | 1.63    | 0.79    | 2.08    | 2.38    | 3.42    | 1.93    | 1.89    | 7.96    | 1.87                  | 15.80                 | 1.70                  | 4.31                  | 2.34    | 8.93    | 3.90    | 13.97    |
| Rel. Inten. (% of BP)   | 0.04   | 0.68   | 12.37  | 5.29   | 0.33    | 11.93   | 11.01   | 14.84   | 45.60   | 10.36   | 61.97   | 13.03   | 15.08   | 21.64   | 12.19   | 11.93   | 50.38   | 11.84                 | 100.00                | 10.76                 | 27.25                 | 14.79   | 56.52   | 24.72   | 88.43    |
| Score                   | 0.20   | 0.50   | -0.12  | 0.22   | 1.00    | 0.50    | -0.11   | 0.75    | 0.50    | -0.10   | 0.75    | -0.13   | 0.50    | 0.75    | 0.50    | 0.75    | 1.50    | -0.12                 | 1.50                  | -0.11                 | -0.27                 | -0.15   | 1.50    | 1.50    | 1.50     |
| Ion-type                | PR     | V      |        | LI     | F       | LS-28   |         | LS      | PF-28   |         | y2-NH3  | b2      | y3-NH3  | y4-NH3  | PFIT    | y4      |         |                       | y9 <sup>+2</sup>      |                       |                       |         | y7      | y8      | y9       |
| Delta ppm               | 11.1   | -6.8   |        | -3.8   | 14.4    | -2.6    |         | -25.2   | -8.5    |         | 13.3    | PF      | 10.0    | 0.6     | -10.5   | 3.3     | 7.4     |                       | -3.5                  |                       |                       |         | 4.1     | -15.5   | 0.8      |

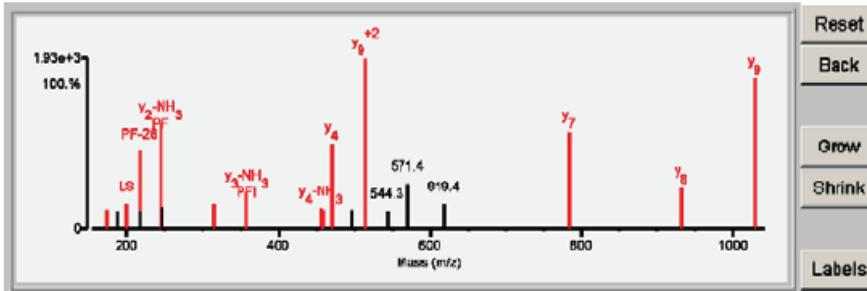

128

Detailed Results

| Rank | Score | SPI (%) | BCS | # Unmatched Ions | Sequence                                                     | MH <sup>+</sup> Calculated (Da) | MH <sup>+</sup> Error (Da) | MH <sup>+</sup> Error (ppm) | Protein MWipl (Da) | Species | Accession #            | MS-Digest Index #      | Protein Name                                                 |
|------|-------|---------|-----|------------------|--------------------------------------------------------------|---------------------------------|----------------------------|-----------------------------|--------------------|---------|------------------------|------------------------|--------------------------------------------------------------|
| 1    | 15.17 | 78.6    | 9   | 6/25             | (R)N L E Q S G F V S L S / G A / Q / I / D / D / N I P R (R) | 2257.0666                       | 0.0121                     | 5.4                         | 62294.0/5.95       | HUMAN   | <a href="#">Q16555</a> | <a href="#">146377</a> | Dihydropyrimidinase-related protein 2 - Homo sapiens (Human) |

  

| Fragment-ion (m/z)      | 70.066 | 84.043 | 86.096 | 101.070 | 110.069 | 120.079 | 272.170 | 344.158 | 499.292 | 599.753 | 614.326 | 635.312 <sup>+2</sup> | 681.312 | 685.355 <sup>+3</sup> | 708.352 <sup>+2</sup> | 729.348 | 764.857 <sup>+2</sup> | 842.433 | 872.369 | 940.457 | 959.400 | 970.493           | 993.464 <sup>+2</sup> | 1054.470 | 1098.533 |
|-------------------------|--------|--------|--------|---------|---------|---------|---------|---------|---------|---------|---------|-----------------------|---------|-----------------------|-----------------------|---------|-----------------------|---------|---------|---------|---------|-------------------|-----------------------|----------|----------|
| Frac. Inten. (% of TIC) | 0.00   | 3.99   | 0.55   | 0.09    | 0.12    | 0.14    | 13.71   | 3.31    | 3.66    | 3.34    | 4.38    | 3.88                  | 3.80    | 2.91                  | 3.62                  | 14.26   | 2.87                  | 11.00   | 3.20    | 3.71    | 3.63    | 5.25              | 2.78                  | 2.66     | 3.09     |
| Rel. Inten. (% of BP)   | 0.03   | 27.99  | 3.87   | 0.65    | 0.84    | 0.99    | 98.10   | 23.24   | 25.68   | 23.45   | 30.74   | 27.21                 | 26.63   | 20.39                 | 25.41                 | 100.00  | 20.10                 | 77.12   | 22.46   | 25.99   | 25.42   | 36.82             | 19.48                 | 18.83    | 21.67    |
| Score                   | 0.20   | -0.28  | 0.22   | 0.50    | 1.00    | 1.00    | 1.50    | 0.75    | 1.50    | -0.23   | 1.50    | 0.25                  | -0.27   | -0.20                 | -0.25                 | 1.50    | 0.50                  | 1.50    | 0.50    | -0.26   | 0.50    | 1.50              | 0.50                  | 0.25     | 1.50     |
| Ion-type                | PR     |        | LI     | QK      | H       | F       | y2      | IDD     | y4      |         | y5      | b12-H2O <sup>+2</sup> |         |                       |                       | y6      | b14 <sup>+2</sup>     | y7      | b7      | be      | y8      | b18 <sup>+2</sup> | b9-H2O                | y10      |          |
| Delta ppm               | 5.3    |        | -2.6   | -10.3   | -18.8   | -15.6   | -4.8    | 34.8    | -12.8   |         | 0.9     | 37.9                  |         |                       |                       | -5.7    | -10.8                 | -4.6    | -4.9    | -4.8    | -2.0    | 8.8               | -8.5                  | -19.4    |          |

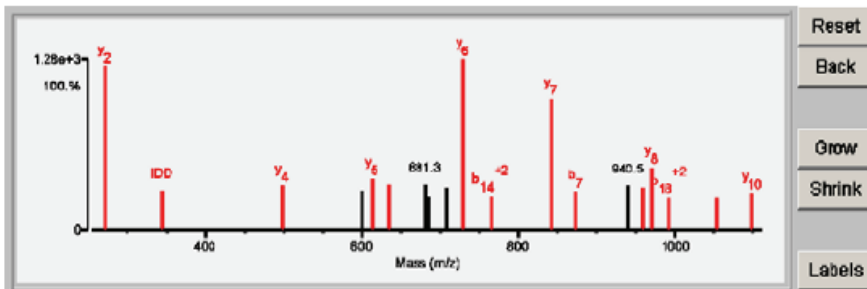

Detailed Results

| Rank                    | Score  | SPI (%) | BCS    | # Unmatched Ions | Sequence                                                    | MH <sup>+</sup> Calculated (Da) | MH <sup>+</sup> Error (Da) | MH <sup>+</sup> Error (ppm) | Protein MW/pl (Da) | Species        | Accession #            | MS-Digest Index #      | Protein Name                                                  |         |                              |                              |                                                |                               |                |                               |                               |                |                               |                               |                       |       |
|-------------------------|--------|---------|--------|------------------|-------------------------------------------------------------|---------------------------------|----------------------------|-----------------------------|--------------------|----------------|------------------------|------------------------|---------------------------------------------------------------|---------|------------------------------|------------------------------|------------------------------------------------|-------------------------------|----------------|-------------------------------|-------------------------------|----------------|-------------------------------|-------------------------------|-----------------------|-------|
| 1                       | 15.80  | 65.1    | 10     | 9/25             | (R) E T S / S / D / V / A / L / A / S H / I / L T A L R (E) | 1871.9531                       | 0.0048                     | 2.6                         | 36522.1/4.68       | HUMAN          | <a href="#">O00273</a> | <a href="#">134213</a> | DNA fragmentation factor subunit alpha - Homo sapiens (Human) |         |                              |                              |                                                |                               |                |                               |                               |                |                               |                               |                       |       |
| Fragment-ion (m/z)      | 70.064 | 72.082  | 84.081 | 86.097           | 102.054                                                     | 110.071                         | 120.080                    | 140.072                     | 148.043            | 175.121        | 185.100                | 187.111                | 213.085                                                       | 300.113 | 455.780 <sup>+2</sup>        | 491.292 <sup>+2</sup>        | 539.311 <sup>+2</sup>                          | 547.839 <sup>+2</sup>         | 573.375        | 583.360 <sup>+2</sup>         | 632.899 <sup>+2</sup>         | 686.451        | 690.409 <sup>+2</sup>         | 733.916 <sup>+2</sup>         | 821.420 <sup>+2</sup> |       |
| Frac. Inten. (% of TIC) | 0.01   | 0.30    | 3.32   | 0.34             | 0.10                                                        | 0.28                            | 4.00                       | 4.44                        | 4.61               | 3.10           | 2.88                   | 3.99                   | 2.90                                                          | 3.11    | 4.87                         | 6.45                         | 2.94                                           | 8.19                          | 6.84           | 13.31                         | 7.54                          | 3.78           | 2.93                          | 4.33                          | 5.63                  |       |
| Rel. Inten. (% of BP)   | 0.06   | 2.25    | 24.91  | 2.54             | 0.76                                                        | 2.11                            | 30.08                      | 33.36                       | 34.62              | 23.32          | 21.80                  | 29.99                  | 21.75                                                         | 23.33   | 35.11                        | 48.47                        | 22.08                                          | 61.54                         | 51.41          | 100.00                        | 58.67                         | 28.36          | 22.04                         | 32.56                         | 42.29                 |       |
| Score                   | 0.20   | 0.50    | -0.25  | 0.22             | 1.00                                                        | 1.00                            | -0.30                      | -0.33                       | -0.35              | 1.50           | -0.22                  | -0.30                  | -0.22                                                         | -0.23   | 1.50                         | 1.50                         | 0.50                                           | 1.50                          | 1.50           | 1.50                          | 1.50                          | 1.50           | 1.50                          | 1.50                          | 1.50                  | -0.42 |
| Ion-type                | PR     | V       |        | LI               | E                                                           | H                               |                            |                             |                    | y <sub>1</sub> |                        |                        |                                                               |         | y <sub>8</sub> <sup>+2</sup> | y <sub>9</sub> <sup>+2</sup> | y <sub>10</sub> -NH <sub>3</sub> <sup>+2</sup> | y <sub>10</sub> <sup>+2</sup> | y <sub>5</sub> | y <sub>11</sub> <sup>+2</sup> | y <sub>12</sub> <sup>+2</sup> | y <sub>6</sub> | y <sub>13</sub> <sup>+2</sup> | y <sub>14</sub> <sup>+2</sup> |                       |       |
| Delta ppm               | -11.8  | 18.4    |        | 10.2             | -9.4                                                        | 0.2                             |                            |                             |                    | 10.0           |                        |                        |                                                               |         | 6.6                          | -6.6                         | -25.2                                          | 3.2                           | 4.9            | 6.8                           | 14.3                          | -7.8           | 8.0                           | -5.1                          |                       |       |

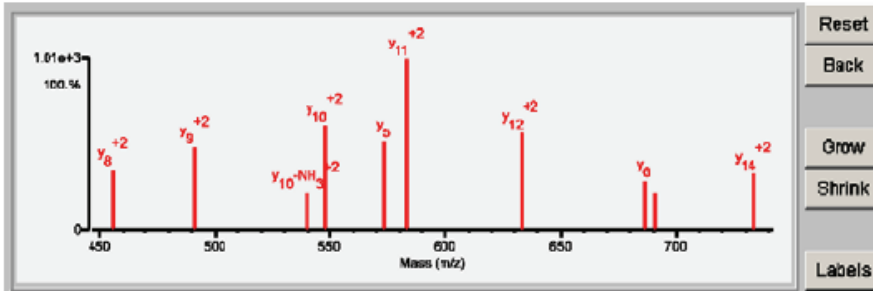

Detailed Results

| Rank                    | Score  | SPI (%) | BCS    | # Unmatched Ions | Sequence                                                | MH <sup>+</sup> Calculated (Da) | MH <sup>+</sup> Error (Da) | MH <sup>+</sup> Error (ppm) | Protein MW/pl (Da) | Species | Accession #            | MS-Digest Index #      | Protein Name                                                 |                 |         |                |         |                |                |                       |                               |                       |                        |          |          |
|-------------------------|--------|---------|--------|------------------|---------------------------------------------------------|---------------------------------|----------------------------|-----------------------------|--------------------|---------|------------------------|------------------------|--------------------------------------------------------------|-----------------|---------|----------------|---------|----------------|----------------|-----------------------|-------------------------------|-----------------------|------------------------|----------|----------|
| 1                       | 13.01  | 50.7    | 6      | 10/25            | (R) I A Q P G D H V S V / T / G I / F / L / P I L R (T) | 2121.1525                       | -0.0107                    | -5.0                        | 81308.4/6.08       | HUMAN   | <a href="#">P33993</a> | <a href="#">324885</a> | DNA replication licensing factor MCM7 - Homo sapiens (Human) |                 |         |                |         |                |                |                       |                               |                       |                        |          |          |
| Fragment-ion (m/z)      | 70.066 | 72.081  | 84.046 | 86.097           | 94.065                                                  | 101.071                         | 110.071                    | 120.080                     | 136.075            | 157.133 | 175.118                | 185.127                | 233.162                                                      | 249.673         | 313.182 | 498.335        | 506.234 | 611.417        | 758.480        | 904.982 <sup>+2</sup> | 928.590                       | 960.001 <sup>+2</sup> | 1004.529 <sup>+2</sup> | 1029.632 | 1303.724 |
| Frac. Inten. (% of TIC) | 0.00   | 0.11    | 3.02   | 0.67             | 1.93                                                    | 0.30                            | 0.12                       | 0.19                        | 1.94               | 4.47    | 3.43                   | 3.18                   | 1.97                                                         | 1.95            | 3.21    | 12.30          | 2.25    | 4.31           | 11.27          | 22.74                 | 4.52                          | 6.98                  | 3.24                   | 2.32     | 3.59     |
| Rel. Inten. (% of BP)   | 0.02   | 0.50    | 13.28  | 2.94             | 8.49                                                    | 1.31                            | 0.51                       | 0.84                        | 8.51               | 19.64   | 15.09                  | 13.97                  | 8.65                                                         | 8.59            | 14.14   | 54.11          | 9.87    | 18.98          | 49.54          | 100.00                | 19.89                         | 30.71                 | 14.24                  | 10.20    | 15.78    |
| Score                   | 0.20   | 0.50    | -0.13  | 0.22             | -0.08                                                   | 0.50                            | 1.00                       | 1.00                        | -0.09              | -0.20   |                        | -0.14                  | -0.09                                                        | 1.50            | -0.14   | 1.50           | 0.75    | 1.50           | 1.50           | -1.00                 | 1.50                          | 0.50                  | -0.14                  | 1.50     | -0.16    |
| Ion-type                | PR     | V       |        | LI               |                                                         | QK                              | H                          | F                           |                    |         | y <sub>1</sub>         |                        |                                                              | y <sup>+4</sup> |         | y <sub>4</sub> | PGDHV   | y <sub>5</sub> | y <sub>8</sub> | y <sub>6</sub>        | a <sub>18</sub> <sup>+2</sup> |                       | y <sub>9</sub>         |          |          |
| Delta ppm               | 18.2   | 7.3     |        | 10.2             |                                                         | 3.6                             | 0.2                        | -3.1                        |                    |         | -5.4                   |                        |                                                              | -1.0            | -10.5   | -4.9           | -10.6   | -16.0          |                | -8.1                  | -27.6                         |                       | -13.2                  |          |          |

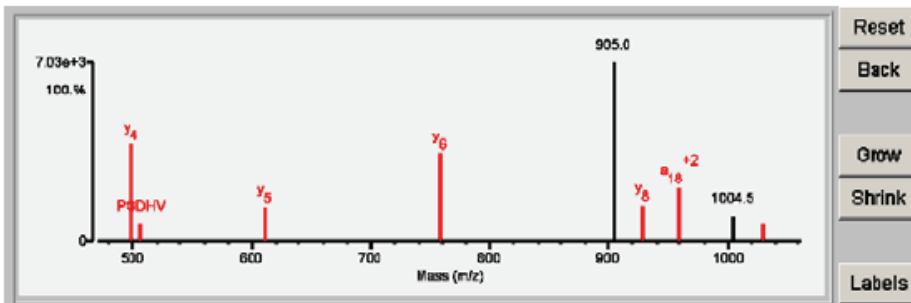

131

Detailed Results

| Rank                                                                                                                                                                                                                                                                                                                                                                                                                                                                                                                                                                                                                                                                                                                                                                                                                                                                                                                                                                                                                                                                                                                                                                                                                                                                                                                                                                                                                                                                                                                                                                                                                                                                                                                                                                                                                                                                                                                                                                                                                                                                                                                                                                                                                                                                                                                                                                                                                                                                                                                                                                                                        | Score  | SP1 (%) | BCS     | # Unmatched Ions | Sequence                              | MH+ Calculated (Da) | MH+ Error (Da) | MH+ Error (ppm) | Protein MW/pi (Da) | Species | Accession #   | M8-Digest Index # | Protein Name                                 |                       |         |                       |                  |         |                       |                       |                  |         |         |          |          |         |         |                       |         |                       |         |         |                       |                       |         |         |         |          |          |                         |      |      |      |      |      |      |      |      |      |      |      |      |      |      |      |      |       |      |      |      |      |      |      |      |      |                       |      |      |      |      |      |      |      |      |      |      |      |      |      |      |      |      |        |      |      |      |      |      |      |      |       |       |      |      |      |      |       |      |      |       |      |      |      |      |      |      |      |      |      |      |      |       |      |       |      |      |      |          |   |    |    |    |  |     |    |  |    |       |    |       |    |                   |    |                       |                  |    |                   |  |                  |  |    |     |     |           |      |      |      |      |  |     |      |  |      |      |      |     |     |     |      |      |     |      |     |  |      |  |      |      |      |
|-------------------------------------------------------------------------------------------------------------------------------------------------------------------------------------------------------------------------------------------------------------------------------------------------------------------------------------------------------------------------------------------------------------------------------------------------------------------------------------------------------------------------------------------------------------------------------------------------------------------------------------------------------------------------------------------------------------------------------------------------------------------------------------------------------------------------------------------------------------------------------------------------------------------------------------------------------------------------------------------------------------------------------------------------------------------------------------------------------------------------------------------------------------------------------------------------------------------------------------------------------------------------------------------------------------------------------------------------------------------------------------------------------------------------------------------------------------------------------------------------------------------------------------------------------------------------------------------------------------------------------------------------------------------------------------------------------------------------------------------------------------------------------------------------------------------------------------------------------------------------------------------------------------------------------------------------------------------------------------------------------------------------------------------------------------------------------------------------------------------------------------------------------------------------------------------------------------------------------------------------------------------------------------------------------------------------------------------------------------------------------------------------------------------------------------------------------------------------------------------------------------------------------------------------------------------------------------------------------------|--------|---------|---------|------------------|---------------------------------------|---------------------|----------------|-----------------|--------------------|---------|---------------|-------------------|----------------------------------------------|-----------------------|---------|-----------------------|------------------|---------|-----------------------|-----------------------|------------------|---------|---------|----------|----------|---------|---------|-----------------------|---------|-----------------------|---------|---------|-----------------------|-----------------------|---------|---------|---------|----------|----------|-------------------------|------|------|------|------|------|------|------|------|------|------|------|------|------|------|------|------|-------|------|------|------|------|------|------|------|------|-----------------------|------|------|------|------|------|------|------|------|------|------|------|------|------|------|------|------|--------|------|------|------|------|------|------|------|-------|-------|------|------|------|------|-------|------|------|-------|------|------|------|------|------|------|------|------|------|------|------|-------|------|-------|------|------|------|----------|---|----|----|----|--|-----|----|--|----|-------|----|-------|----|-------------------|----|-----------------------|------------------|----|-------------------|--|------------------|--|----|-----|-----|-----------|------|------|------|------|--|-----|------|--|------|------|------|-----|-----|-----|------|------|-----|------|-----|--|------|--|------|------|------|
| 1                                                                                                                                                                                                                                                                                                                                                                                                                                                                                                                                                                                                                                                                                                                                                                                                                                                                                                                                                                                                                                                                                                                                                                                                                                                                                                                                                                                                                                                                                                                                                                                                                                                                                                                                                                                                                                                                                                                                                                                                                                                                                                                                                                                                                                                                                                                                                                                                                                                                                                                                                                                                           | 23.33  | 91.8    | 10      | 4/25             | (K) D/G/V/P E/G A/Q L/Q/G/P V/I/R (N) | 1947.7908           | 0.0048         | 2.9             | 40990.1/8.77       | HUMAN   | P16888 127231 |                   | DNA-binding protein A - Homo sapiens (Human) |                       |         |                       |                  |         |                       |                       |                  |         |         |          |          |         |         |                       |         |                       |         |         |                       |                       |         |         |         |          |          |                         |      |      |      |      |      |      |      |      |      |      |      |      |      |      |      |      |       |      |      |      |      |      |      |      |      |                       |      |      |      |      |      |      |      |      |      |      |      |      |      |      |      |      |        |      |      |      |      |      |      |      |       |       |      |      |      |      |       |      |      |       |      |      |      |      |      |      |      |      |      |      |      |       |      |       |      |      |      |          |   |    |    |    |  |     |    |  |    |       |    |       |    |                   |    |                       |                  |    |                   |  |                  |  |    |     |     |           |      |      |      |      |  |     |      |  |      |      |      |     |     |     |      |      |     |      |     |  |      |  |      |      |      |
| <table border="1"> <thead> <tr> <th>Fragment-Ion (m/z)</th> <th>72.082</th> <th>176.118</th> <th>227.102</th> <th>261.063</th> <th>278.132</th> <th>284.125</th> <th>312.177</th> <th>314.117</th> <th>332.127</th> <th>356.181</th> <th>380.129</th> <th>483.221</th> <th>508.901</th> <th>631.784<sup>+2</sup></th> <th>686.318</th> <th>695.832<sup>+2</sup></th> <th>844.842</th> <th>880.378</th> <th>884.381<sup>+2</sup></th> <th>717.368<sup>+2</sup></th> <th>722.884</th> <th>723.987</th> <th>804.618</th> <th>1082.677</th> <th>1288.871</th> </tr> </thead> <tbody> <tr> <td>Frac. Inten. (% of TIC)</td> <td>0.12</td> <td>1.65</td> <td>0.81</td> <td>3.13</td> <td>0.93</td> <td>1.01</td> <td>1.14</td> <td>1.29</td> <td>2.70</td> <td>1.35</td> <td>3.08</td> <td>1.54</td> <td>0.82</td> <td>2.03</td> <td>3.09</td> <td>2.20</td> <td>49.24</td> <td>1.33</td> <td>0.98</td> <td>2.10</td> <td>4.11</td> <td>3.85</td> <td>1.19</td> <td>1.34</td> <td>9.05</td> </tr> <tr> <td>Rel. Inten. (% of BP)</td> <td>0.25</td> <td>3.35</td> <td>1.64</td> <td>6.37</td> <td>1.90</td> <td>2.05</td> <td>2.31</td> <td>2.61</td> <td>5.49</td> <td>2.75</td> <td>6.26</td> <td>3.13</td> <td>1.67</td> <td>4.13</td> <td>6.28</td> <td>4.47</td> <td>100.00</td> <td>2.70</td> <td>2.00</td> <td>4.26</td> <td>8.34</td> <td>7.81</td> <td>2.42</td> <td>2.52</td> <td>18.38</td> </tr> <tr> <td>Score</td> <td>0.50</td> <td>1.50</td> <td>0.75</td> <td>0.50</td> <td>-0.02</td> <td>0.75</td> <td>1.50</td> <td>-0.03</td> <td>0.50</td> <td>0.75</td> <td>0.50</td> <td>0.75</td> <td>1.50</td> <td>1.50</td> <td>0.50</td> <td>1.50</td> <td>1.50</td> <td>1.50</td> <td>1.50</td> <td>-0.04</td> <td>1.50</td> <td>-0.08</td> <td>1.50</td> <td>1.50</td> <td>1.50</td> </tr> <tr> <td>Ion-type</td> <td>V</td> <td>y1</td> <td>PE</td> <td>b2</td> <td></td> <td>PEQ</td> <td>y2</td> <td></td> <td>b3</td> <td>PEQAQ</td> <td>b3</td> <td>PEQAQ</td> <td>y4</td> <td>y10<sup>+2</sup></td> <td>y5</td> <td>y12+H2O<sup>+2</sup></td> <td>y<sup>+12</sup></td> <td>y8</td> <td>y13<sup>+2</sup></td> <td></td> <td>y<sup>+14</sup></td> <td></td> <td>y8</td> <td>y10</td> <td>y12</td> </tr> <tr> <td>Delta ppm</td> <td>10.0</td> <td>-3.2</td> <td>-6.3</td> <td>-6.0</td> <td></td> <td>0.0</td> <td>-4.0</td> <td></td> <td>-4.1</td> <td>-3.1</td> <td>-0.2</td> <td>0.2</td> <td>3.3</td> <td>0.6</td> <td>-3.5</td> <td>-6.7</td> <td>1.0</td> <td>-1.9</td> <td>7.8</td> <td></td> <td>-3.7</td> <td></td> <td>-6.1</td> <td>-2.8</td> <td>-3.3</td> </tr> </tbody> </table> |        |         |         |                  |                                       |                     |                |                 |                    |         |               |                   |                                              | Fragment-Ion (m/z)    | 72.082  | 176.118               | 227.102          | 261.063 | 278.132               | 284.125               | 312.177          | 314.117 | 332.127 | 356.181  | 380.129  | 483.221 | 508.901 | 631.784 <sup>+2</sup> | 686.318 | 695.832 <sup>+2</sup> | 844.842 | 880.378 | 884.381 <sup>+2</sup> | 717.368 <sup>+2</sup> | 722.884 | 723.987 | 804.618 | 1082.677 | 1288.871 | Frac. Inten. (% of TIC) | 0.12 | 1.65 | 0.81 | 3.13 | 0.93 | 1.01 | 1.14 | 1.29 | 2.70 | 1.35 | 3.08 | 1.54 | 0.82 | 2.03 | 3.09 | 2.20 | 49.24 | 1.33 | 0.98 | 2.10 | 4.11 | 3.85 | 1.19 | 1.34 | 9.05 | Rel. Inten. (% of BP) | 0.25 | 3.35 | 1.64 | 6.37 | 1.90 | 2.05 | 2.31 | 2.61 | 5.49 | 2.75 | 6.26 | 3.13 | 1.67 | 4.13 | 6.28 | 4.47 | 100.00 | 2.70 | 2.00 | 4.26 | 8.34 | 7.81 | 2.42 | 2.52 | 18.38 | Score | 0.50 | 1.50 | 0.75 | 0.50 | -0.02 | 0.75 | 1.50 | -0.03 | 0.50 | 0.75 | 0.50 | 0.75 | 1.50 | 1.50 | 0.50 | 1.50 | 1.50 | 1.50 | 1.50 | -0.04 | 1.50 | -0.08 | 1.50 | 1.50 | 1.50 | Ion-type | V | y1 | PE | b2 |  | PEQ | y2 |  | b3 | PEQAQ | b3 | PEQAQ | y4 | y10 <sup>+2</sup> | y5 | y12+H2O <sup>+2</sup> | y <sup>+12</sup> | y8 | y13 <sup>+2</sup> |  | y <sup>+14</sup> |  | y8 | y10 | y12 | Delta ppm | 10.0 | -3.2 | -6.3 | -6.0 |  | 0.0 | -4.0 |  | -4.1 | -3.1 | -0.2 | 0.2 | 3.3 | 0.6 | -3.5 | -6.7 | 1.0 | -1.9 | 7.8 |  | -3.7 |  | -6.1 | -2.8 | -3.3 |
| Fragment-Ion (m/z)                                                                                                                                                                                                                                                                                                                                                                                                                                                                                                                                                                                                                                                                                                                                                                                                                                                                                                                                                                                                                                                                                                                                                                                                                                                                                                                                                                                                                                                                                                                                                                                                                                                                                                                                                                                                                                                                                                                                                                                                                                                                                                                                                                                                                                                                                                                                                                                                                                                                                                                                                                                          | 72.082 | 176.118 | 227.102 | 261.063          | 278.132                               | 284.125             | 312.177        | 314.117         | 332.127            | 356.181 | 380.129       | 483.221           | 508.901                                      | 631.784 <sup>+2</sup> | 686.318 | 695.832 <sup>+2</sup> | 844.842          | 880.378 | 884.381 <sup>+2</sup> | 717.368 <sup>+2</sup> | 722.884          | 723.987 | 804.618 | 1082.677 | 1288.871 |         |         |                       |         |                       |         |         |                       |                       |         |         |         |          |          |                         |      |      |      |      |      |      |      |      |      |      |      |      |      |      |      |      |       |      |      |      |      |      |      |      |      |                       |      |      |      |      |      |      |      |      |      |      |      |      |      |      |      |      |        |      |      |      |      |      |      |      |       |       |      |      |      |      |       |      |      |       |      |      |      |      |      |      |      |      |      |      |      |       |      |       |      |      |      |          |   |    |    |    |  |     |    |  |    |       |    |       |    |                   |    |                       |                  |    |                   |  |                  |  |    |     |     |           |      |      |      |      |  |     |      |  |      |      |      |     |     |     |      |      |     |      |     |  |      |  |      |      |      |
| Frac. Inten. (% of TIC)                                                                                                                                                                                                                                                                                                                                                                                                                                                                                                                                                                                                                                                                                                                                                                                                                                                                                                                                                                                                                                                                                                                                                                                                                                                                                                                                                                                                                                                                                                                                                                                                                                                                                                                                                                                                                                                                                                                                                                                                                                                                                                                                                                                                                                                                                                                                                                                                                                                                                                                                                                                     | 0.12   | 1.65    | 0.81    | 3.13             | 0.93                                  | 1.01                | 1.14           | 1.29            | 2.70               | 1.35    | 3.08          | 1.54              | 0.82                                         | 2.03                  | 3.09    | 2.20                  | 49.24            | 1.33    | 0.98                  | 2.10                  | 4.11             | 3.85    | 1.19    | 1.34     | 9.05     |         |         |                       |         |                       |         |         |                       |                       |         |         |         |          |          |                         |      |      |      |      |      |      |      |      |      |      |      |      |      |      |      |      |       |      |      |      |      |      |      |      |      |                       |      |      |      |      |      |      |      |      |      |      |      |      |      |      |      |      |        |      |      |      |      |      |      |      |       |       |      |      |      |      |       |      |      |       |      |      |      |      |      |      |      |      |      |      |      |       |      |       |      |      |      |          |   |    |    |    |  |     |    |  |    |       |    |       |    |                   |    |                       |                  |    |                   |  |                  |  |    |     |     |           |      |      |      |      |  |     |      |  |      |      |      |     |     |     |      |      |     |      |     |  |      |  |      |      |      |
| Rel. Inten. (% of BP)                                                                                                                                                                                                                                                                                                                                                                                                                                                                                                                                                                                                                                                                                                                                                                                                                                                                                                                                                                                                                                                                                                                                                                                                                                                                                                                                                                                                                                                                                                                                                                                                                                                                                                                                                                                                                                                                                                                                                                                                                                                                                                                                                                                                                                                                                                                                                                                                                                                                                                                                                                                       | 0.25   | 3.35    | 1.64    | 6.37             | 1.90                                  | 2.05                | 2.31           | 2.61            | 5.49               | 2.75    | 6.26          | 3.13              | 1.67                                         | 4.13                  | 6.28    | 4.47                  | 100.00           | 2.70    | 2.00                  | 4.26                  | 8.34             | 7.81    | 2.42    | 2.52     | 18.38    |         |         |                       |         |                       |         |         |                       |                       |         |         |         |          |          |                         |      |      |      |      |      |      |      |      |      |      |      |      |      |      |      |      |       |      |      |      |      |      |      |      |      |                       |      |      |      |      |      |      |      |      |      |      |      |      |      |      |      |      |        |      |      |      |      |      |      |      |       |       |      |      |      |      |       |      |      |       |      |      |      |      |      |      |      |      |      |      |      |       |      |       |      |      |      |          |   |    |    |    |  |     |    |  |    |       |    |       |    |                   |    |                       |                  |    |                   |  |                  |  |    |     |     |           |      |      |      |      |  |     |      |  |      |      |      |     |     |     |      |      |     |      |     |  |      |  |      |      |      |
| Score                                                                                                                                                                                                                                                                                                                                                                                                                                                                                                                                                                                                                                                                                                                                                                                                                                                                                                                                                                                                                                                                                                                                                                                                                                                                                                                                                                                                                                                                                                                                                                                                                                                                                                                                                                                                                                                                                                                                                                                                                                                                                                                                                                                                                                                                                                                                                                                                                                                                                                                                                                                                       | 0.50   | 1.50    | 0.75    | 0.50             | -0.02                                 | 0.75                | 1.50           | -0.03           | 0.50               | 0.75    | 0.50          | 0.75              | 1.50                                         | 1.50                  | 0.50    | 1.50                  | 1.50             | 1.50    | 1.50                  | -0.04                 | 1.50             | -0.08   | 1.50    | 1.50     | 1.50     |         |         |                       |         |                       |         |         |                       |                       |         |         |         |          |          |                         |      |      |      |      |      |      |      |      |      |      |      |      |      |      |      |      |       |      |      |      |      |      |      |      |      |                       |      |      |      |      |      |      |      |      |      |      |      |      |      |      |      |      |        |      |      |      |      |      |      |      |       |       |      |      |      |      |       |      |      |       |      |      |      |      |      |      |      |      |      |      |      |       |      |       |      |      |      |          |   |    |    |    |  |     |    |  |    |       |    |       |    |                   |    |                       |                  |    |                   |  |                  |  |    |     |     |           |      |      |      |      |  |     |      |  |      |      |      |     |     |     |      |      |     |      |     |  |      |  |      |      |      |
| Ion-type                                                                                                                                                                                                                                                                                                                                                                                                                                                                                                                                                                                                                                                                                                                                                                                                                                                                                                                                                                                                                                                                                                                                                                                                                                                                                                                                                                                                                                                                                                                                                                                                                                                                                                                                                                                                                                                                                                                                                                                                                                                                                                                                                                                                                                                                                                                                                                                                                                                                                                                                                                                                    | V      | y1      | PE      | b2               |                                       | PEQ                 | y2             |                 | b3                 | PEQAQ   | b3            | PEQAQ             | y4                                           | y10 <sup>+2</sup>     | y5      | y12+H2O <sup>+2</sup> | y <sup>+12</sup> | y8      | y13 <sup>+2</sup>     |                       | y <sup>+14</sup> |         | y8      | y10      | y12      |         |         |                       |         |                       |         |         |                       |                       |         |         |         |          |          |                         |      |      |      |      |      |      |      |      |      |      |      |      |      |      |      |      |       |      |      |      |      |      |      |      |      |                       |      |      |      |      |      |      |      |      |      |      |      |      |      |      |      |      |        |      |      |      |      |      |      |      |       |       |      |      |      |      |       |      |      |       |      |      |      |      |      |      |      |      |      |      |      |       |      |       |      |      |      |          |   |    |    |    |  |     |    |  |    |       |    |       |    |                   |    |                       |                  |    |                   |  |                  |  |    |     |     |           |      |      |      |      |  |     |      |  |      |      |      |     |     |     |      |      |     |      |     |  |      |  |      |      |      |
| Delta ppm                                                                                                                                                                                                                                                                                                                                                                                                                                                                                                                                                                                                                                                                                                                                                                                                                                                                                                                                                                                                                                                                                                                                                                                                                                                                                                                                                                                                                                                                                                                                                                                                                                                                                                                                                                                                                                                                                                                                                                                                                                                                                                                                                                                                                                                                                                                                                                                                                                                                                                                                                                                                   | 10.0   | -3.2    | -6.3    | -6.0             |                                       | 0.0                 | -4.0           |                 | -4.1               | -3.1    | -0.2          | 0.2               | 3.3                                          | 0.6                   | -3.5    | -6.7                  | 1.0              | -1.9    | 7.8                   |                       | -3.7             |         | -6.1    | -2.8     | -3.3     |         |         |                       |         |                       |         |         |                       |                       |         |         |         |          |          |                         |      |      |      |      |      |      |      |      |      |      |      |      |      |      |      |      |       |      |      |      |      |      |      |      |      |                       |      |      |      |      |      |      |      |      |      |      |      |      |      |      |      |      |        |      |      |      |      |      |      |      |       |       |      |      |      |      |       |      |      |       |      |      |      |      |      |      |      |      |      |      |      |       |      |       |      |      |      |          |   |    |    |    |  |     |    |  |    |       |    |       |    |                   |    |                       |                  |    |                   |  |                  |  |    |     |     |           |      |      |      |      |  |     |      |  |      |      |      |     |     |     |      |      |     |      |     |  |      |  |      |      |      |

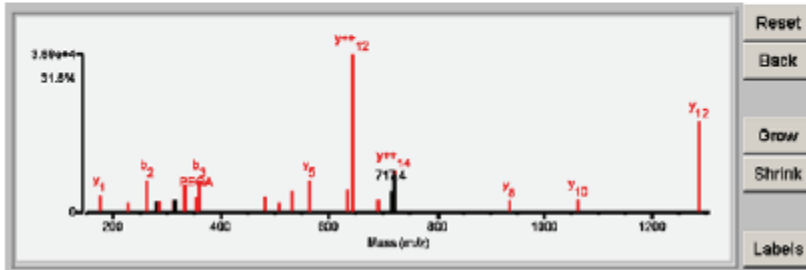

132

Detailed Results

| Rank                                                                                                                                                                                                                                                                                                                                                                                                                                                                                                                                                                                                                                                                                                                                                                                                                                                                                                                                                                                                                                                                                                                                                                                                                                                                                                                                                                                                                                                                                                                                                                                                                                                                                                                                                                                                                                                                                                                                                                                                                                                                                                                                                                                                                                                                                                                                                                                                                                                                                | Score  | SP1 (%) | BCS    | # Unmatched Ions | Sequence                      | MH+ Calculated (Da) | MH+ Error (Da) | MH+ Error (ppm) | Protein MW/pi (Da) | Species | Accession #   | M8-Digest Index # | Protein Name                                                                      |                    |         |         |         |         |         |         |                       |                       |         |         |         |         |         |         |         |         |         |         |         |         |                       |                       |         |         |         |                         |      |      |      |      |      |      |      |      |      |       |      |      |      |      |      |      |      |      |      |      |      |      |      |      |      |                       |      |      |       |      |       |       |      |       |       |        |       |       |       |       |       |       |       |       |       |       |       |       |       |       |       |       |      |      |       |      |       |       |      |      |      |      |      |      |      |      |      |      |       |      |       |      |       |       |       |      |      |          |    |   |  |    |  |   |        |    |    |    |    |    |    |    |    |    |  |    |    |  |  |  |    |    |           |      |      |  |     |  |       |      |      |      |      |       |      |      |       |      |  |       |  |       |  |  |  |      |     |
|-------------------------------------------------------------------------------------------------------------------------------------------------------------------------------------------------------------------------------------------------------------------------------------------------------------------------------------------------------------------------------------------------------------------------------------------------------------------------------------------------------------------------------------------------------------------------------------------------------------------------------------------------------------------------------------------------------------------------------------------------------------------------------------------------------------------------------------------------------------------------------------------------------------------------------------------------------------------------------------------------------------------------------------------------------------------------------------------------------------------------------------------------------------------------------------------------------------------------------------------------------------------------------------------------------------------------------------------------------------------------------------------------------------------------------------------------------------------------------------------------------------------------------------------------------------------------------------------------------------------------------------------------------------------------------------------------------------------------------------------------------------------------------------------------------------------------------------------------------------------------------------------------------------------------------------------------------------------------------------------------------------------------------------------------------------------------------------------------------------------------------------------------------------------------------------------------------------------------------------------------------------------------------------------------------------------------------------------------------------------------------------------------------------------------------------------------------------------------------------|--------|---------|--------|------------------|-------------------------------|---------------------|----------------|-----------------|--------------------|---------|---------------|-------------------|-----------------------------------------------------------------------------------|--------------------|---------|---------|---------|---------|---------|---------|-----------------------|-----------------------|---------|---------|---------|---------|---------|---------|---------|---------|---------|---------|---------|---------|-----------------------|-----------------------|---------|---------|---------|-------------------------|------|------|------|------|------|------|------|------|------|-------|------|------|------|------|------|------|------|------|------|------|------|------|------|------|------|-----------------------|------|------|-------|------|-------|-------|------|-------|-------|--------|-------|-------|-------|-------|-------|-------|-------|-------|-------|-------|-------|-------|-------|-------|-------|-------|------|------|-------|------|-------|-------|------|------|------|------|------|------|------|------|------|------|-------|------|-------|------|-------|-------|-------|------|------|----------|----|---|--|----|--|---|--------|----|----|----|----|----|----|----|----|----|--|----|----|--|--|--|----|----|-----------|------|------|--|-----|--|-------|------|------|------|------|-------|------|------|-------|------|--|-------|--|-------|--|--|--|------|-----|
| 1                                                                                                                                                                                                                                                                                                                                                                                                                                                                                                                                                                                                                                                                                                                                                                                                                                                                                                                                                                                                                                                                                                                                                                                                                                                                                                                                                                                                                                                                                                                                                                                                                                                                                                                                                                                                                                                                                                                                                                                                                                                                                                                                                                                                                                                                                                                                                                                                                                                                                   | 13.78  | 72.1    | 9      | 8/26             | (K) E D/Y/T/Q/I/L/C/Y/P/R (N) | 1440.8828           | 0.0166         | 11.6            | 62638.1/8.36       | HUMAN   | Q88EY1 141863 |                   | DnaJ homolog subfamily A member 3, mitochondrial precursor - Homo sapiens (Human) |                    |         |         |         |         |         |         |                       |                       |         |         |         |         |         |         |         |         |         |         |         |         |                       |                       |         |         |         |                         |      |      |      |      |      |      |      |      |      |       |      |      |      |      |      |      |      |      |      |      |      |      |      |      |      |                       |      |      |       |      |       |       |      |       |       |        |       |       |       |       |       |       |       |       |       |       |       |       |       |       |       |       |      |      |       |      |       |       |      |      |      |      |      |      |      |      |      |      |       |      |       |      |       |       |       |      |      |          |    |   |  |    |  |   |        |    |    |    |    |    |    |    |    |    |  |    |    |  |  |  |    |    |           |      |      |  |     |  |       |      |      |      |      |       |      |      |       |      |  |       |  |       |  |  |  |      |     |
| <table border="1"> <thead> <tr> <th>Fragment-Ion (m/z)</th> <th>70.088</th> <th>72.081</th> <th>84.081</th> <th>88.087</th> <th>94.088</th> <th>120.081</th> <th>138.074</th> <th>168.095</th> <th>176.118</th> <th>272.170</th> <th>333.074</th> <th>371.236</th> <th>428.268</th> <th>488.144</th> <th>498.135</th> <th>641.342</th> <th>844.320</th> <th>854.422</th> <th>858.344</th> <th>868.198</th> <th>881.374<sup>+2</sup></th> <th>873.869<sup>+2</sup></th> <th>891.352</th> <th>782.488</th> <th>946.668</th> </tr> </thead> <tbody> <tr> <td>Frac. Inten. (% of TIC)</td> <td>0.01</td> <td>0.12</td> <td>3.41</td> <td>0.33</td> <td>2.72</td> <td>2.89</td> <td>0.54</td> <td>2.33</td> <td>3.53</td> <td>10.56</td> <td>4.53</td> <td>4.47</td> <td>8.72</td> <td>3.39</td> <td>8.15</td> <td>6.26</td> <td>2.27</td> <td>5.06</td> <td>4.62</td> <td>5.21</td> <td>6.36</td> <td>3.30</td> <td>2.37</td> <td>4.11</td> <td>4.72</td> </tr> <tr> <td>Rel. Inten. (% of BP)</td> <td>0.05</td> <td>1.11</td> <td>32.32</td> <td>3.15</td> <td>25.79</td> <td>27.38</td> <td>5.12</td> <td>22.10</td> <td>33.46</td> <td>100.00</td> <td>42.88</td> <td>42.37</td> <td>82.54</td> <td>32.12</td> <td>77.25</td> <td>59.32</td> <td>21.50</td> <td>47.92</td> <td>43.75</td> <td>49.33</td> <td>60.23</td> <td>31.21</td> <td>22.42</td> <td>38.89</td> <td>44.67</td> </tr> <tr> <td>Score</td> <td>0.20</td> <td>0.50</td> <td>-0.32</td> <td>0.22</td> <td>-0.26</td> <td>-0.27</td> <td>1.00</td> <td>0.50</td> <td>1.50</td> <td>1.50</td> <td>0.50</td> <td>1.50</td> <td>1.50</td> <td>0.50</td> <td>0.50</td> <td>1.50</td> <td>-0.22</td> <td>1.50</td> <td>-0.44</td> <td>0.50</td> <td>-0.60</td> <td>-0.31</td> <td>-0.22</td> <td>1.50</td> <td>1.50</td> </tr> <tr> <td>Ion-type</td> <td>PR</td> <td>V</td> <td></td> <td>LI</td> <td></td> <td>Y</td> <td>y1-NH3</td> <td>y1</td> <td>y2</td> <td>b2</td> <td>y3</td> <td>y4</td> <td>b3</td> <td>y5</td> <td>b3</td> <td>y6</td> <td></td> <td>y6</td> <td>b4</td> <td></td> <td></td> <td></td> <td>y7</td> <td>y8</td> </tr> <tr> <td>Delta ppm</td> <td>13.9</td> <td>-1.0</td> <td></td> <td>0.9</td> <td></td> <td>-14.6</td> <td>13.3</td> <td>-6.6</td> <td>-5.6</td> <td>-5.4</td> <td>-15.2</td> <td>-8.4</td> <td>-0.2</td> <td>-14.0</td> <td>-6.2</td> <td></td> <td>-11.8</td> <td></td> <td>-11.0</td> <td></td> <td></td> <td></td> <td>-0.9</td> <td>8.2</td> </tr> </tbody> </table> |        |         |        |                  |                               |                     |                |                 |                    |         |               |                   |                                                                                   | Fragment-Ion (m/z) | 70.088  | 72.081  | 84.081  | 88.087  | 94.088  | 120.081 | 138.074               | 168.095               | 176.118 | 272.170 | 333.074 | 371.236 | 428.268 | 488.144 | 498.135 | 641.342 | 844.320 | 854.422 | 858.344 | 868.198 | 881.374 <sup>+2</sup> | 873.869 <sup>+2</sup> | 891.352 | 782.488 | 946.668 | Frac. Inten. (% of TIC) | 0.01 | 0.12 | 3.41 | 0.33 | 2.72 | 2.89 | 0.54 | 2.33 | 3.53 | 10.56 | 4.53 | 4.47 | 8.72 | 3.39 | 8.15 | 6.26 | 2.27 | 5.06 | 4.62 | 5.21 | 6.36 | 3.30 | 2.37 | 4.11 | 4.72 | Rel. Inten. (% of BP) | 0.05 | 1.11 | 32.32 | 3.15 | 25.79 | 27.38 | 5.12 | 22.10 | 33.46 | 100.00 | 42.88 | 42.37 | 82.54 | 32.12 | 77.25 | 59.32 | 21.50 | 47.92 | 43.75 | 49.33 | 60.23 | 31.21 | 22.42 | 38.89 | 44.67 | Score | 0.20 | 0.50 | -0.32 | 0.22 | -0.26 | -0.27 | 1.00 | 0.50 | 1.50 | 1.50 | 0.50 | 1.50 | 1.50 | 0.50 | 0.50 | 1.50 | -0.22 | 1.50 | -0.44 | 0.50 | -0.60 | -0.31 | -0.22 | 1.50 | 1.50 | Ion-type | PR | V |  | LI |  | Y | y1-NH3 | y1 | y2 | b2 | y3 | y4 | b3 | y5 | b3 | y6 |  | y6 | b4 |  |  |  | y7 | y8 | Delta ppm | 13.9 | -1.0 |  | 0.9 |  | -14.6 | 13.3 | -6.6 | -5.6 | -5.4 | -15.2 | -8.4 | -0.2 | -14.0 | -6.2 |  | -11.8 |  | -11.0 |  |  |  | -0.9 | 8.2 |
| Fragment-Ion (m/z)                                                                                                                                                                                                                                                                                                                                                                                                                                                                                                                                                                                                                                                                                                                                                                                                                                                                                                                                                                                                                                                                                                                                                                                                                                                                                                                                                                                                                                                                                                                                                                                                                                                                                                                                                                                                                                                                                                                                                                                                                                                                                                                                                                                                                                                                                                                                                                                                                                                                  | 70.088 | 72.081  | 84.081 | 88.087           | 94.088                        | 120.081             | 138.074        | 168.095         | 176.118            | 272.170 | 333.074       | 371.236           | 428.268                                                                           | 488.144            | 498.135 | 641.342 | 844.320 | 854.422 | 858.344 | 868.198 | 881.374 <sup>+2</sup> | 873.869 <sup>+2</sup> | 891.352 | 782.488 | 946.668 |         |         |         |         |         |         |         |         |         |                       |                       |         |         |         |                         |      |      |      |      |      |      |      |      |      |       |      |      |      |      |      |      |      |      |      |      |      |      |      |      |      |                       |      |      |       |      |       |       |      |       |       |        |       |       |       |       |       |       |       |       |       |       |       |       |       |       |       |       |      |      |       |      |       |       |      |      |      |      |      |      |      |      |      |      |       |      |       |      |       |       |       |      |      |          |    |   |  |    |  |   |        |    |    |    |    |    |    |    |    |    |  |    |    |  |  |  |    |    |           |      |      |  |     |  |       |      |      |      |      |       |      |      |       |      |  |       |  |       |  |  |  |      |     |
| Frac. Inten. (% of TIC)                                                                                                                                                                                                                                                                                                                                                                                                                                                                                                                                                                                                                                                                                                                                                                                                                                                                                                                                                                                                                                                                                                                                                                                                                                                                                                                                                                                                                                                                                                                                                                                                                                                                                                                                                                                                                                                                                                                                                                                                                                                                                                                                                                                                                                                                                                                                                                                                                                                             | 0.01   | 0.12    | 3.41   | 0.33             | 2.72                          | 2.89                | 0.54           | 2.33            | 3.53               | 10.56   | 4.53          | 4.47              | 8.72                                                                              | 3.39               | 8.15    | 6.26    | 2.27    | 5.06    | 4.62    | 5.21    | 6.36                  | 3.30                  | 2.37    | 4.11    | 4.72    |         |         |         |         |         |         |         |         |         |                       |                       |         |         |         |                         |      |      |      |      |      |      |      |      |      |       |      |      |      |      |      |      |      |      |      |      |      |      |      |      |      |                       |      |      |       |      |       |       |      |       |       |        |       |       |       |       |       |       |       |       |       |       |       |       |       |       |       |       |      |      |       |      |       |       |      |      |      |      |      |      |      |      |      |      |       |      |       |      |       |       |       |      |      |          |    |   |  |    |  |   |        |    |    |    |    |    |    |    |    |    |  |    |    |  |  |  |    |    |           |      |      |  |     |  |       |      |      |      |      |       |      |      |       |      |  |       |  |       |  |  |  |      |     |
| Rel. Inten. (% of BP)                                                                                                                                                                                                                                                                                                                                                                                                                                                                                                                                                                                                                                                                                                                                                                                                                                                                                                                                                                                                                                                                                                                                                                                                                                                                                                                                                                                                                                                                                                                                                                                                                                                                                                                                                                                                                                                                                                                                                                                                                                                                                                                                                                                                                                                                                                                                                                                                                                                               | 0.05   | 1.11    | 32.32  | 3.15             | 25.79                         | 27.38               | 5.12           | 22.10           | 33.46              | 100.00  | 42.88         | 42.37             | 82.54                                                                             | 32.12              | 77.25   | 59.32   | 21.50   | 47.92   | 43.75   | 49.33   | 60.23                 | 31.21                 | 22.42   | 38.89   | 44.67   |         |         |         |         |         |         |         |         |         |                       |                       |         |         |         |                         |      |      |      |      |      |      |      |      |      |       |      |      |      |      |      |      |      |      |      |      |      |      |      |      |      |                       |      |      |       |      |       |       |      |       |       |        |       |       |       |       |       |       |       |       |       |       |       |       |       |       |       |       |      |      |       |      |       |       |      |      |      |      |      |      |      |      |      |      |       |      |       |      |       |       |       |      |      |          |    |   |  |    |  |   |        |    |    |    |    |    |    |    |    |    |  |    |    |  |  |  |    |    |           |      |      |  |     |  |       |      |      |      |      |       |      |      |       |      |  |       |  |       |  |  |  |      |     |
| Score                                                                                                                                                                                                                                                                                                                                                                                                                                                                                                                                                                                                                                                                                                                                                                                                                                                                                                                                                                                                                                                                                                                                                                                                                                                                                                                                                                                                                                                                                                                                                                                                                                                                                                                                                                                                                                                                                                                                                                                                                                                                                                                                                                                                                                                                                                                                                                                                                                                                               | 0.20   | 0.50    | -0.32  | 0.22             | -0.26                         | -0.27               | 1.00           | 0.50            | 1.50               | 1.50    | 0.50          | 1.50              | 1.50                                                                              | 0.50               | 0.50    | 1.50    | -0.22   | 1.50    | -0.44   | 0.50    | -0.60                 | -0.31                 | -0.22   | 1.50    | 1.50    |         |         |         |         |         |         |         |         |         |                       |                       |         |         |         |                         |      |      |      |      |      |      |      |      |      |       |      |      |      |      |      |      |      |      |      |      |      |      |      |      |      |                       |      |      |       |      |       |       |      |       |       |        |       |       |       |       |       |       |       |       |       |       |       |       |       |       |       |       |      |      |       |      |       |       |      |      |      |      |      |      |      |      |      |      |       |      |       |      |       |       |       |      |      |          |    |   |  |    |  |   |        |    |    |    |    |    |    |    |    |    |  |    |    |  |  |  |    |    |           |      |      |  |     |  |       |      |      |      |      |       |      |      |       |      |  |       |  |       |  |  |  |      |     |
| Ion-type                                                                                                                                                                                                                                                                                                                                                                                                                                                                                                                                                                                                                                                                                                                                                                                                                                                                                                                                                                                                                                                                                                                                                                                                                                                                                                                                                                                                                                                                                                                                                                                                                                                                                                                                                                                                                                                                                                                                                                                                                                                                                                                                                                                                                                                                                                                                                                                                                                                                            | PR     | V       |        | LI               |                               | Y                   | y1-NH3         | y1              | y2                 | b2      | y3            | y4                | b3                                                                                | y5                 | b3      | y6      |         | y6      | b4      |         |                       |                       | y7      | y8      |         |         |         |         |         |         |         |         |         |         |                       |                       |         |         |         |                         |      |      |      |      |      |      |      |      |      |       |      |      |      |      |      |      |      |      |      |      |      |      |      |      |      |                       |      |      |       |      |       |       |      |       |       |        |       |       |       |       |       |       |       |       |       |       |       |       |       |       |       |       |      |      |       |      |       |       |      |      |      |      |      |      |      |      |      |      |       |      |       |      |       |       |       |      |      |          |    |   |  |    |  |   |        |    |    |    |    |    |    |    |    |    |  |    |    |  |  |  |    |    |           |      |      |  |     |  |       |      |      |      |      |       |      |      |       |      |  |       |  |       |  |  |  |      |     |
| Delta ppm                                                                                                                                                                                                                                                                                                                                                                                                                                                                                                                                                                                                                                                                                                                                                                                                                                                                                                                                                                                                                                                                                                                                                                                                                                                                                                                                                                                                                                                                                                                                                                                                                                                                                                                                                                                                                                                                                                                                                                                                                                                                                                                                                                                                                                                                                                                                                                                                                                                                           | 13.9   | -1.0    |        | 0.9              |                               | -14.6               | 13.3           | -6.6            | -5.6               | -5.4    | -15.2         | -8.4              | -0.2                                                                              | -14.0              | -6.2    |         | -11.8   |         | -11.0   |         |                       |                       | -0.9    | 8.2     |         |         |         |         |         |         |         |         |         |         |                       |                       |         |         |         |                         |      |      |      |      |      |      |      |      |      |       |      |      |      |      |      |      |      |      |      |      |      |      |      |      |      |                       |      |      |       |      |       |       |      |       |       |        |       |       |       |       |       |       |       |       |       |       |       |       |       |       |       |       |      |      |       |      |       |       |      |      |      |      |      |      |      |      |      |      |       |      |       |      |       |       |       |      |      |          |    |   |  |    |  |   |        |    |    |    |    |    |    |    |    |    |  |    |    |  |  |  |    |    |           |      |      |  |     |  |       |      |      |      |      |       |      |      |       |      |  |       |  |       |  |  |  |      |     |

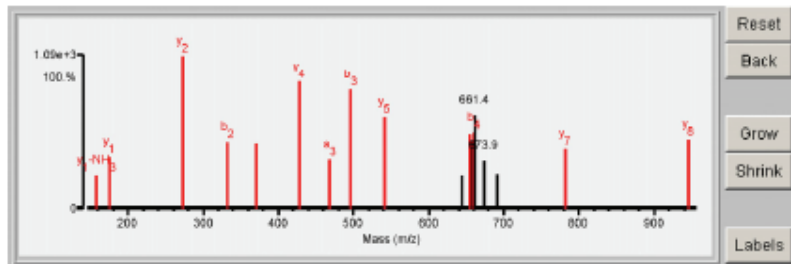

133

Detailed Results

| Rank | Score | SPI (%) | BCS | # Unmatched Ions | Sequence                                                                        | MH <sup>+</sup> Calculated (Da) | MH <sup>+</sup> Error (Da) | MH <sup>+</sup> Error (ppm) | Protein MW/pi (Da) | Species | Accession #            | MS-Digest Index #      | Protein Name                                          |
|------|-------|---------|-----|------------------|---------------------------------------------------------------------------------|---------------------------------|----------------------------|-----------------------------|--------------------|---------|------------------------|------------------------|-------------------------------------------------------|
| 1    | 11.29 | 70.5    | 7   | 10/25            | (R) I G P E P T T D S F I A V N H O P T E S G V V I P G N A / L V V D P / R (R) | 3360.6603                       | -0.0061                    | -1.8                        | 60627.2/6.35       | HUMAN   | <a href="#">Q9H4M9</a> | <a href="#">160101</a> | EH domain-containing protein 1 - Homo sapiens (Human) |

  

| Fragment-ion (m/z)      | 70.064 | 72.080 | 86.098 | 136.077 | 143.113 | 175.115 | 203.105 | 227.106 | 272.171 | 273.173 | 353.724 | 397.205 | 585.335 | 698.417 | 706.435 | 737.399  | 766.421 | 888.413 | 920.473 | 963.467 <sup>+3</sup> | 996.818 <sup>+3</sup>             | 1037.574 | 1063.436 <sup>+2</sup> | 1113.032 <sup>+2</sup> | 1162.555 <sup>+2</sup> |
|-------------------------|--------|--------|--------|---------|---------|---------|---------|---------|---------|---------|---------|---------|---------|---------|---------|----------|---------|---------|---------|-----------------------|-----------------------------------|----------|------------------------|------------------------|------------------------|
| Frac. Inten. (% of TIC) | 0.00   | 0.26   | 0.33   | 2.51    | 2.03    | 2.97    | 2.47    | 3.19    | 21.31   | 3.80    | 2.12    | 2.30    | 3.28    | 3.95    | 4.83    | 2.28     | 3.04    | 2.87    | 2.19    | 3.85                  | 6.24                              | 3.89     | 3.51                   | 5.59                   | 11.18                  |
| Rel. Inten. (% of BP)   | 0.02   | 1.22   | 1.53   | 11.77   | 9.51    | 13.96   | 11.60   | 14.98   | 100.00  | 17.83   | 9.95    | 10.79   | 15.41   | 18.53   | 22.65   | 10.72    | 14.26   | 13.47   | 10.27   | 18.08                 | 29.28                             | 18.25    | 16.47                  | 26.25                  | 52.48                  |
| Score                   | 0.20   | 0.50   | 0.22   | -0.12   | -0.10   | 1.50    | 0.75    | 0.75    | 1.50    | -0.18   | -0.10   | -0.11   | 1.50    | 1.50    | -0.23   | 0.75     | -0.14   | -0.13   | -0.10   | -0.18                 | 0.50                              | 1.50     | 0.50                   | 0.50                   | 0.50                   |
| Ion-type                | PR     | V      | LI     |         |         | y1      | TT      | EP      | y2      |         |         |         | y5      | y6      |         | PTEGVVPG |         |         |         |                       | y29-NH <sub>3</sub> <sup>+3</sup> | y10      | b20 <sup>+2</sup>      | b21 <sup>+2</sup>      | b22 <sup>+2</sup>      |
| Delta ppm               | -10.4  | -8.0   | 13.6   |         |         | -20.9   | 5.3     | 9.1     | -0.8    |         |         |         | -1.3    | -4.1    |         | 20.6     |         |         |         |                       | -13.0                             | 0.2      | 12.8                   | 13.5                   | 3.7                    |

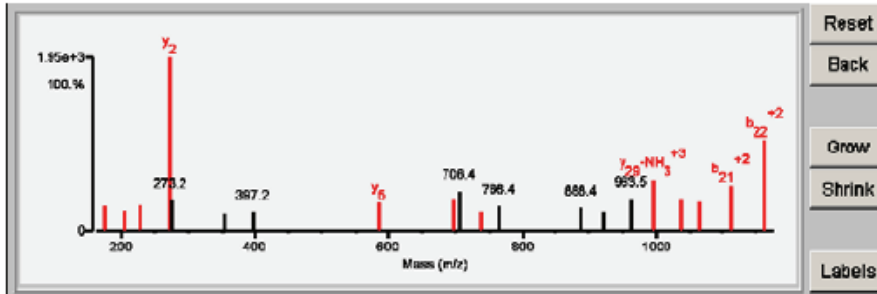

134

Detailed Results

| Rank | Score | SPI (%) | BCS | # Unmatched Ions | Sequence                                    | MH <sup>+</sup> Calculated (Da) | MH <sup>+</sup> Error (Da) | MH <sup>+</sup> Error (ppm) | Protein MW/pi (Da) | Species | Accession #            | MS-Digest Index #      | Protein Name                                            |
|------|-------|---------|-----|------------------|---------------------------------------------|---------------------------------|----------------------------|-----------------------------|--------------------|---------|------------------------|------------------------|---------------------------------------------------------|
| 1    | 11.70 | 68.7    | 6   | 10/25            | (C) V E S I F / S / D / Y / P P L / G R (F) | 1454.6620                       | 0.0075                     | 5.1                         | 50141.1/9.10       | HUMAN   | <a href="#">P68104</a> | <a href="#">153989</a> | Elongation factor 1-alpha 1 - Homo sapiens (Human)      |
| 1    | 11.70 | 68.7    | 6   | 10/25            | (C) V E S I F / S / D / Y / P P L / G R (F) | 1454.6620                       | 0.0075                     | 5.1                         | 50185.3/9.15       | HUMAN   | <a href="#">Q5VTE0</a> | <a href="#">154035</a> | Elongation factor 1-alpha-like 3 - Homo sapiens (Human) |

  

| Fragment-ion (m/z)      | 70.064 | 72.079 | 102.052 | 120.080 | 160.074 | 186.086 | 199.069 | 232.143 | 279.131 | 308.223 | 386.140             | 404.147 | 419.209 | 450.213 | 533.200             | 539.329 | 615.093 | 688.984 | 702.401 | 735.258             | 755.327 | 768.278 | 817.404 | 904.454 | 1051.506 |
|-------------------------|--------|--------|---------|---------|---------|---------|---------|---------|---------|---------|---------------------|---------|---------|---------|---------------------|---------|---------|---------|---------|---------------------|---------|---------|---------|---------|----------|
| Frac. Inten. (% of TIC) | 0.00   | 0.11   | 0.10    | 0.09    | 4.24    | 2.16    | 2.63    | 6.10    | 2.19    | 6.38    | 8.08                | 3.29    | 2.69    | 2.53    | 4.96                | 17.92   | 3.11    | 2.58    | 5.78    | 2.35                | 2.10    | 4.93    | 2.55    | 10.30   | 2.88     |
| Rel. Inten. (% of BP)   | 0.01   | 0.59   | 0.53    | 0.49    | 23.66   | 12.03   | 14.70   | 34.04   | 12.21   | 35.60   | 45.00               | 18.37   | 15.01   | 14.09   | 27.67               | 100.00  | 17.33   | 14.40   | 32.17   | 13.13               | 11.73   | 27.53   | 14.21   | 57.50   | 16.07    |
| Score                   | 0.20   | 0.50   | 1.00    | 1.00    | 0.50    | -0.12   | -0.15   | 1.50    | -0.12   | -0.36   | 0.25                | 0.60    | -0.15   | -0.14   | 0.25                | 1.50    | -0.17   | -0.14   | 1.50    | 0.25                | -0.12   | -0.28   | 1.50    | 1.50    | 1.50     |
| Ion-type                | PR     | V      | E       | F       | a1      |         |         | y2      |         |         | b3-H <sub>2</sub> O | b3      |         |         | b4-H <sub>2</sub> O | y5      |         |         | y6      | b6-H <sub>2</sub> O |         | y7      | y8      | y9      |          |
| Delta ppm               | -16.1  | -19.1  | -29.9   | -6.5    | -39.1   |         |         | 9.8     |         |         | 1.2                 | -5.4    |         |         | -14.7               | -1.5    |         |         | 10.8    | -11.0               |         | -19.4   | 1.4     | -13.9   |          |

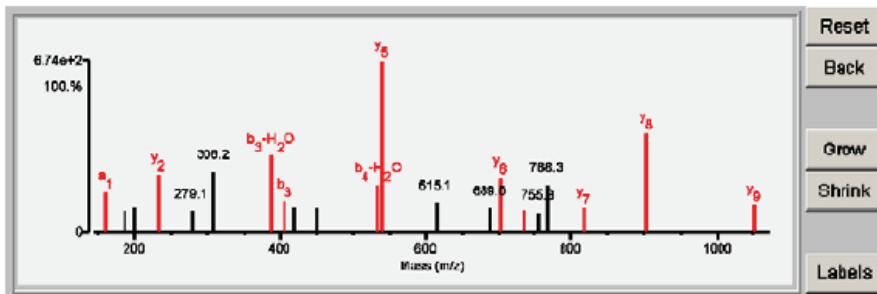



135

Detailed Results

| Rank | Score | SPI (%) | BCS | # Unmatched ions | Sequence              | MH <sup>+</sup> Calculated (Da) | MH <sup>+</sup> Error (Da) | MH <sup>+</sup> Error (ppm) | Protein MW pI (Da) | Species | Accession # | MS-Digest Index # | Protein Name                                            |
|------|-------|---------|-----|------------------|-----------------------|---------------------------------|----------------------------|-----------------------------|--------------------|---------|-------------|-------------------|---------------------------------------------------------|
| 1    | 14.88 | 82.2    | 6   | 10/25            | (S) D/T/P/P/L/G/R (F) | 805.4188                        | 0.0048                     | 6.3                         | 60141.1/8.10       | HUMAN   | P88104      | 163888            | Elongation factor 1-alpha 1 - Homo sapiens (Human)      |
| 1    | 14.88 | 82.2    | 6   | 10/25            | (S) D/T/P/P/L/G/R (F) | 805.4188                        | 0.0048                     | 6.3                         | 60185.3/8.16       | HUMAN   | Q6VTEQ      | 164036            | Elongation factor 1-alpha-like 3 - Homo sapiens (Human) |

  

| Fragment-Ion (m/z)      | 70.086 | 88.086 | 98.094 | 100.048 | 118.050 | 128.056 | 138.074 | 168.082 | 176.118 | 180.148 | 211.141 | 221.842 | 232.138 | 251.070 | 270.188 | 328.204 <sup>+2</sup> | 338.232 | 346.232 | 388.231 | 426.250 | 442.278 | 478.291 | 521.316 | 638.328 | 702.389 |
|-------------------------|--------|--------|--------|---------|---------|---------|---------|---------|---------|---------|---------|---------|---------|---------|---------|-----------------------|---------|---------|---------|---------|---------|---------|---------|---------|---------|
| Frac. Inten. (% of TIC) | 0.02   | 0.04   | 1.86   | 1.20    | 1.41    | 1.41    | 1.14    | 2.47    | 2.61    | 5.45    | 2.38    | 1.96    | 2.02    | 2.32    | 12.93   | 1.42                  | 1.19    | 1.49    | 3.28    | 4.21    | 22.78   | 1.48    | 2.25    | 21.30   | 1.37    |
| Rel. Inten. (% of BP)   | 0.10   | 0.17   | 8.16   | 5.25    | 6.21    | 6.21    | 5.01    | 10.82   | 11.44   | 23.93   | 10.44   | 8.60    | 8.89    | 10.18   | 56.76   | 6.23                  | 5.24    | 6.55    | 14.41   | 18.49   | 100.00  | 6.49    | 9.89    | 93.49   | 6.01    |
| Score                   | 0.20   | 0.22   | -0.08  | -0.05   | -0.06   | -0.06   | 1.00    | 0.50    | 1.50    | 0.50    | 0.75    | 1.50    | 1.50    | 1.50    | 1.50    | -0.06                 | -0.05   | -0.14   | 1.50    | 1.50    | 1.50    | -0.06   | -0.10   | 1.50    | 1.50    |
| Ion-type                | PR     | LI     |        |         |         |         |         | Y1-NH3  | Y1      | PL-28   | PL      | Y+4     | Y2      | Y+5     |         |                       |         | Y3      |         | Y4-NH3  | Y4      |         |         | Y5      | Y6      |
| Delta ppm               | 3.9    | -13.1  |        |         |         |         | -14.6   | -3.8    | -4.9    | -14.1   | -20.8   | -1.6    | -20.3   |         |         |                       |         | 22.9    |         | 5.0     | 1.7     |         |         | -2.2    | -6.2    |

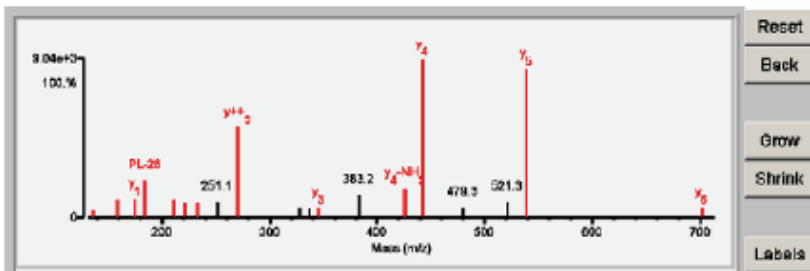

136

Detailed Results

| Rank | Score | SPI (%) | BCS | # Unmatched ions | Sequence                                | MH <sup>+</sup> Calculated (Da) | MH <sup>+</sup> Error (Da) | MH <sup>+</sup> Error (ppm) | Protein MW pI (Da) | Species | Accession # | MS-Digest Index # | Protein Name                                    |
|------|-------|---------|-----|------------------|-----------------------------------------|---------------------------------|----------------------------|-----------------------------|--------------------|---------|-------------|-------------------|-------------------------------------------------|
| 1    | 14.81 | 76.6    | 5   | 10/25            | (F) P A V S S P P P A D L C H A L R (W) | 1750.8251                       | 0.0080                     | 1.7                         | 24783.8/4.60       | HUMAN   | P24634      | 164311            | Elongation factor 1-beta - Homo sapiens (Human) |

  

| Fragment-Ion (m/z)      | 70.086 | 72.081 | 84.043 | 88.086 | 84.086 | 128.064 | 138.078 | 143.080 | 178.085 | 175.120 | 183.074 | 188.108 | 201.088 | 227.077 | 264.142 | 282.147           | 300.181          | 387.207 <sup>+3</sup> | 488.260 <sup>+2</sup> | 548.782 <sup>+2</sup> | 686.311 <sup>+2</sup> | 873.813 <sup>+2</sup> | 775.881 <sup>+2</sup> | 886.503 | 1082.561 |
|-------------------------|--------|--------|--------|--------|--------|---------|---------|---------|---------|---------|---------|---------|---------|---------|---------|-------------------|------------------|-----------------------|-----------------------|-----------------------|-----------------------|-----------------------|-----------------------|---------|----------|
| Frac. Inten. (% of TIC) | 0.00   | 0.34   | 0.07   | 0.24   | 1.97   | 2.59    | 1.85    | 1.57    | 1.89    | 1.71    | 3.94    | 1.60    | 5.05    | 2.12    | 1.78    | 2.00              | 1.64             | 6.23                  | 4.11                  | 17.05                 | 28.35                 | 3.81                  | 1.87                  | 4.35    | 3.93     |
| Rel. Inten. (% of BP)   | 0.02   | 1.21   | 0.26   | 0.84   | 6.97   | 9.15    | 6.51    | 5.55    | 6.68    | 6.04    | 13.54   | 5.65    | 17.80   | 7.45    | 6.29    | 7.05              | 5.79             | 21.97                 | 14.51                 | 60.14                 | 100.00                | 13.45                 | 6.60                  | 15.33   | 13.87    |
| Score                   | 0.20   | 0.50   | 1.00   | 0.22   | -0.07  | -0.09   | -0.07   | -0.06   | -0.07   | 1.50    | -0.14   | -0.05   | -0.18   | -0.07   | 0.50    | 0.75              | 1.50             | 1.50                  | 1.50                  | 1.50                  | 1.50                  | 0.50                  | -0.07                 | 1.50    | 1.50     |
| Ion-type                | PR     | V      | E      | LI     |        |         |         |         | Y1      |         |         |         | 8PP-28  | 8PP     | Y+5     | Y11 <sup>+3</sup> | Y9 <sup>+2</sup> | Y10 <sup>+2</sup>     | Y11 <sup>+2</sup>     | Y13-NH3 <sup>+2</sup> | Y9                    | Y10                   |                       |         |          |
| Delta ppm               | -0.4   | 8.7    | -16.5  | -9.6   |        |         |         |         | 3.7     |         |         |         |         |         | -35.9   | 3.1               | 10.2             | -5.6                  | -17.5                 | -4.3                  | -0.8                  | -25.4                 | -6.0                  | -10.4   |          |

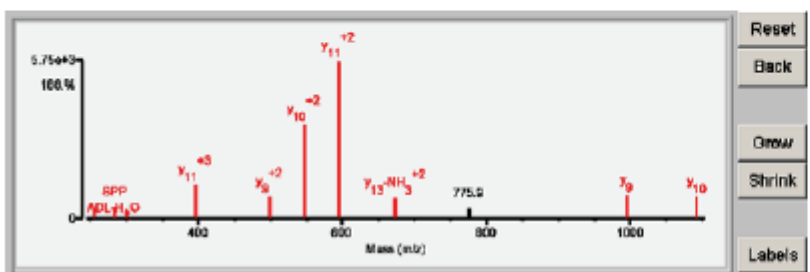



137

Detailed Results

| Rank | Score | SPI (%) | BCS | # Unmatched Ions | Sequence                              | MH <sup>+</sup> Calculated (Da) | MH <sup>+</sup> Error (Da) | MH <sup>+</sup> Error (ppm) | Protein MW/pi (Da) | Species | Accession # | MS-Digest Index # | Protein Name                                     |
|------|-------|---------|-----|------------------|---------------------------------------|---------------------------------|----------------------------|-----------------------------|--------------------|---------|-------------|-------------------|--------------------------------------------------|
| 1    | 14.58 | 69.1    | 7   | 8/24             | (R) V L S A/P/E/E F/B/T/G Q T N/R (T) | 1795.8697                       | 0.0093                     | 5.2                         | 50119.1/6.25       | HUMAN   | P26641      | 154441            | Elongation factor 1-gamma - Homo sapiens (Human) |

  

| Fragment-ion (m/z)      | 70.066 | 72.081 | 86.097 | 94.067 | 110.071 | 113.071 | 120.081 | 166.059 | 175.118 | 183.110 | 185.164 | 201.073 | 219.080 | 235.118 | 257.142 | 285.134 | 404.180 | 430.209          | 572.276 <sup>+2</sup> | 575.293        | 620.794 <sup>+2</sup> | 669.322 <sup>+2</sup> | 722.355        | 859.402        |
|-------------------------|--------|--------|--------|--------|---------|---------|---------|---------|---------|---------|---------|---------|---------|---------|---------|---------|---------|------------------|-----------------------|----------------|-----------------------|-----------------------|----------------|----------------|
| Frac. Inten. (% of TIC) | 0.02   | 1.10   | 0.95   | 4.64   | 0.36    | 2.98    | 0.26    | 3.37    | 4.81    | 2.26    | 6.36    | 5.32    | 3.63    | 7.54    | 4.64    | 5.21    | 2.35    | 2.38             | 5.66                  | 3.53           | 8.40                  | 13.17                 | 5.48           | 5.66           |
| Rel. Inten. (% of BP)   | 0.19   | 8.35   | 7.25   | 35.23  | 2.74    | 22.60   | 1.95    | 25.56   | 36.49   | 17.13   | 48.32   | 40.40   | 27.56   | 57.27   | 35.23   | 39.52   | 17.67   | 18.09            | 42.96                 | 26.81          | 63.79                 | 100.00                | 41.60          | 42.24          |
| Score                   | 0.20   | 0.50   | 0.22   | -0.36  | 1.00    | -0.23   | 1.00    | -0.28   | 1.50    | -0.17   | -0.48   | -0.40   | -0.28   | 0.75    | 0.50    | 0.75    | -0.18   | 1.50             | 1.50                  | 1.50           | 1.50                  | 1.50                  | 1.50           | 1.50           |
| Ion-type                | PR     | V      | LI     | H      | F       |         |         |         | y1      |         |         |         |         | PH      | HF-28   | HF      |         | y <sup>++7</sup> | y <sup>9+2</sup>      | y <sup>6</sup> | y <sup>10+2</sup>     | y <sup>11+2</sup>     | y <sup>6</sup> | y <sup>7</sup> |
| Delta ppm               | 12.5   | 5.9    | 0.9    |        | -5.2    |         |         |         | -4.9    |         |         |         |         | -9.3    | 5.1     | -4.6    |         | -7.7             | 0.8                   | 5.7            | -13.5                 | -9.6                  | -4.7           | -17.6          |

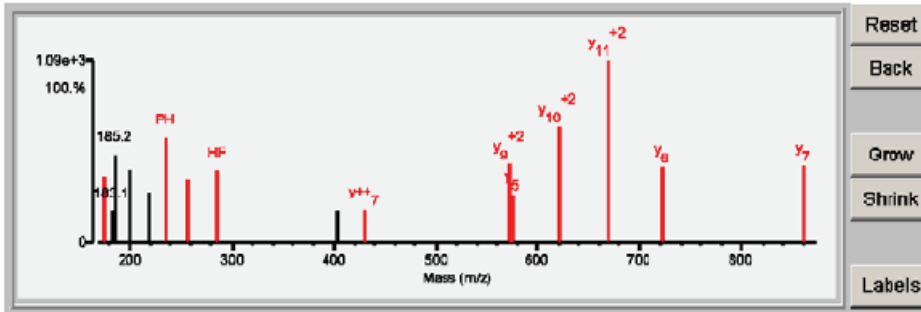

138

Detailed Results

| Rank | Score | SPI (%) | BCS | # Unmatched Ions | Sequence                                                                        | MH <sup>+</sup> Calculated (Da) | MH <sup>+</sup> Error (Da) | MH <sup>+</sup> Error (ppm) | Protein MW/pi (Da) | Species | Accession # | MS-Digest Index # | Protein Name                               |
|------|-------|---------|-----|------------------|---------------------------------------------------------------------------------|---------------------------------|----------------------------|-----------------------------|--------------------|---------|-------------|-------------------|--------------------------------------------|
| 1    | 11.42 | 73.0    | 7   | 14/25            | (S) E T G Q/A/P/V Q C Y F D H W Q I L/V G D/P F D/R R R R R P Q Y V A R T K (K) | 4188.9291                       | 0.0803                     | 14.4                        | 95338.7/6.41       | HUMAN   | P13639      | 154511            | Elongation factor 2 - Homo sapiens (Human) |

  

| Fragment-ion (m/z)      | 86.094 | 410.132 | 500.286 | 586.272                       | 598.286 | 613.220 | 716.869 <sup>+2</sup> | 746.310         | 754.247         | 877.415 | 896.436           | 926.423 <sup>+2</sup> | 972.417 <sup>+2</sup> | 974.488 | 993.494 <sup>+2</sup> | 997.995 <sup>+4</sup> | 1000.997 <sup>+4</sup> | 1030.006 <sup>+2</sup> | 1034.439 | 1142.582 <sup>+3</sup> | 1145.619 <sup>+2</sup> | 1191.562 <sup>+3</sup> | 1215.246 <sup>+3</sup> | 1276.956 <sup>+3</sup> | 1286.265 <sup>+3</sup> |
|-------------------------|--------|---------|---------|-------------------------------|---------|---------|-----------------------|-----------------|-----------------|---------|-------------------|-----------------------|-----------------------|---------|-----------------------|-----------------------|------------------------|------------------------|----------|------------------------|------------------------|------------------------|------------------------|------------------------|------------------------|
| Frac. Inten. (% of TIC) | 0.06   | 1.49    | 1.37    | 1.79                          | 1.51    | 1.45    | 1.78                  | 2.27            | 1.48            | 2.29    | 3.81              | 1.92                  | 1.37                  | 2.21    | 2.48                  | 2.02                  | 1.38                   | 6.43                   | 1.57     | 25.73                  | 1.53                   | 13.84                  | 11.14                  | 4.73                   | 4.37                   |
| Rel. Inten. (% of BP)   | 0.34   | 5.78    | 5.32    | 6.97                          | 5.88    | 5.62    | 6.50                  | 8.54            | 5.88            | 8.88    | 14.82             | 7.45                  | 5.32                  | 8.60    | 9.56                  | 7.87                  | 5.36                   | 25.00                  | 6.12     | 100.00                 | 5.34                   | 53.80                  | 43.30                  | 18.38                  | 17.00                  |
| Score                   | 0.22   | -0.08   | 0.75    | 0.75                          | -0.06   | -0.06   | 1.50                  | 0.25            | -0.06           | -0.09   | 1.50              | -0.07                 | -0.05                 | -0.09   | -0.10                 | -0.08                 | -0.05                  | 1.50                   | -0.06    | 1.50                   | 1.50                   | 1.50                   | 1.50                   | 1.50                   | -0.17                  |
| Ion-type                | LI     | WAEI    | WAEI    | y <sup>5-NH<sub>2</sub></sup> |         |         | y <sup>13+2</sup>     | y <sup>12</sup> | y <sup>12</sup> |         | y <sup>++16</sup> |                       |                       |         |                       |                       |                        | y <sup>19+2</sup>      |          | y <sup>20+3</sup>      | y <sup>31+3</sup>      | y <sup>32+3</sup>      | y <sup>34+3</sup>      | y <sup>34+3</sup>      |                        |
| Delta ppm               | -31.7  |         | 27.4    | -28.5                         |         |         | -17.0                 | 22.3            |                 |         | -9.5              |                       |                       |         |                       |                       |                        | 12.0                   |          | 2.2                    | -8.3                   | -1.4                   | 10.4                   |                        |                        |

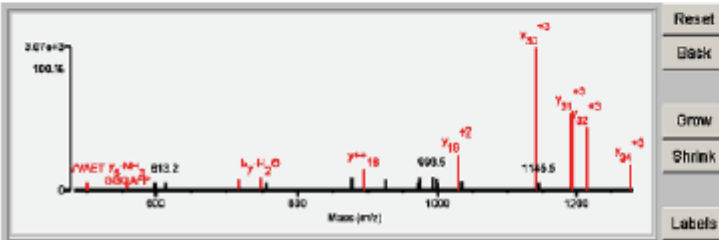

139

Detailed Results

| Rank                    | Score  | SPI (%) | BCS    | # Unmatched Ions | Sequence                                              | MH <sup>+</sup> Calculated (Da) | MH <sup>+</sup> Error (Da) | MH <sup>+</sup> Error (ppm) | Protein MW(pI) (Da) | Species | Accession # | MS-Digest Index #     | Protein Name                                 |                       |                       |                       |         |         |                       |                                                 |                               |                                                 |                               |                               |         |
|-------------------------|--------|---------|--------|------------------|-------------------------------------------------------|---------------------------------|----------------------------|-----------------------------|---------------------|---------|-------------|-----------------------|----------------------------------------------|-----------------------|-----------------------|-----------------------|---------|---------|-----------------------|-------------------------------------------------|-------------------------------|-------------------------------------------------|-------------------------------|-------------------------------|---------|
| 1                       | 14.25  | 77.8    | 10     | 625              | (R) F Q V A N K R P D L V P A L D I Q V Y V R K R (M) | 2348.0612                       | 0.0122                     | 6.2                         | 92488.3/4.78        | HUMAN   | P14825      | 185471                | Endoplasmic precursor - Homo sapiens (Human) |                       |                       |                       |         |         |                       |                                                 |                               |                                                 |                               |                               |         |
| Fragment-Ion (m/z)      | 84.043 | 88.086  | 88.088 | 101.070          | 104.052                                               | 120.078                         | 138.074                    | 175.117                     | 261.118             | 304.168 | 403.228     | 583.222 <sup>+2</sup> | 688.288                                      | 818.784 <sup>+2</sup> | 881.288 <sup>+2</sup> | 870.280 <sup>+2</sup> | 877.322 | 884.347 | 886.780 <sup>+2</sup> | 704.798 <sup>+2</sup>                           | 713.808 <sup>+2</sup>         | 781.048 <sup>+2</sup>                           | 808.371                       | 827.884 <sup>+2</sup>         | 887.408 |
| Frac. Inten. (% of TIC) | 0.10   | 0.44    | 2.63   | 0.09             | 2.40                                                  | 0.11                            | 0.18                       | 3.54                        | 5.01                | 4.11    | 9.57        | 6.00                  | 9.92                                         | 3.90                  | 6.51                  | 2.90                  | 3.08    | 3.05    | 6.96                  | 9.14                                            | 5.34                          | 2.37                                            | 3.48                          | 4.17                          | 5.08    |
| Rel. Inten. (% of BP)   | 1.05   | 4.46    | 26.47  | 0.86             | 24.15                                                 | 1.14                            | 1.81                       | 36.64                       | 50.43               | 41.43   | 96.41       | 60.47                 | 100.00                                       | 39.30                 | 65.69                 | 28.24                 | 31.17   | 30.69   | 70.17                 | 92.12                                           | 53.85                         | 23.88                                           | 35.05                         | 41.99                         | 51.21   |
| Score                   | 1.00   | 0.22    | -0.25  | 0.50             | -0.24                                                 | 1.00                            | 1.00                       | 1.50                        | 1.50                | 1.50    | 1.50        | 0.50                  | 1.50                                         | 0.25                  | 0.50                  | 0.50                  | 0.50    | 1.50    | -0.70                 | 0.25                                            | 0.50                          | 1.50                                            | 0.50                          | 0.50                          | -0.51   |
| Ion-type                | E      | LJ      |        | GK               |                                                       | F                               | Y                          | YI                          | YI                  | YI      | YI          | YI                    | YI                                           | YI                    | YI                    | YI                    | YI      | YI      | YI                    | b <sub>12</sub> +H <sub>2</sub> O <sup>+2</sup> | b <sub>12</sub> <sup>+2</sup> | b <sub>13</sub> +H <sub>2</sub> O <sup>+2</sup> | b <sub>13</sub> <sup>+2</sup> | b <sub>14</sub> <sup>+2</sup> |         |
| Delta ppm               | -11.8  | -4.9    |        | -8.3             |                                                       | -12.3                           | -10.2                      | -9.4                        |                     | -9.0    | -5.1        | -5.1                  | -7.4                                         |                       | -5.2                  |                       | -5.6    | -7.2    |                       | -3.8                                            | 2.1                           | 2.7                                             | -9.0                          | 2.3                           |         |

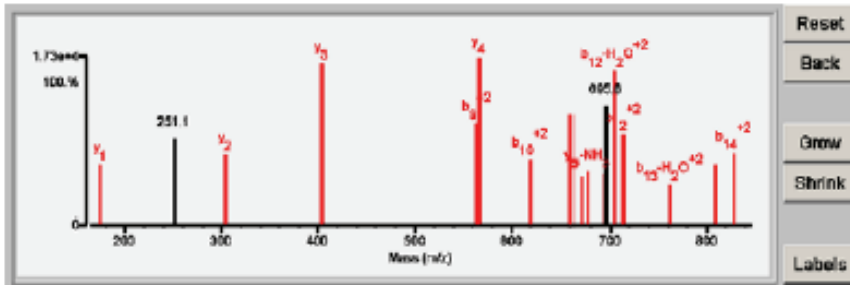

140

Detailed Results

| Rank                    | Score  | SPI (%) | BCS    | # Unmatched Ions | Sequence                                              | MH <sup>+</sup> Calculated (Da) | MH <sup>+</sup> Error (Da) | MH <sup>+</sup> Error (ppm) | Protein MW(pI) (Da) | Species               | Accession #           | MS-Digest Index #     | Protein Name                                                      |                       |                       |                       |                   |                   |                       |                   |                       |                   |                       |                        |                   |                   |
|-------------------------|--------|---------|--------|------------------|-------------------------------------------------------|---------------------------------|----------------------------|-----------------------------|---------------------|-----------------------|-----------------------|-----------------------|-------------------------------------------------------------------|-----------------------|-----------------------|-----------------------|-------------------|-------------------|-----------------------|-------------------|-----------------------|-------------------|-----------------------|------------------------|-------------------|-------------------|
| 1                       | 13.48  | 75.6    | 9      | 1125             | (A) D A V F E G D D I L V P A G R E D Y I R I K R (I) | 2409.8850                       | 0.0110                     | 4.6                         | 12732.6/6.90        | HUMAN                 | P49567                | 180282                | Eukaryotic translation initiation factor 1 - Homo sapiens (Human) |                       |                       |                       |                   |                   |                       |                   |                       |                   |                       |                        |                   |                   |
| Fragment-Ion (m/z)      | 72.080 | 85.096  | 94.065 | 275.069          | 328.075                                               | 344.093                         | 362.097                    | 425.258                     | 514.141             | 827.323 <sup>+2</sup> | 638.323 <sup>+2</sup> | 681.318 <sup>+3</sup> | 692.895 <sup>+2</sup>                                             | 705.019 <sup>+3</sup> | 739.453 <sup>+2</sup> | 749.399 <sup>+2</sup> | 793.327           | 760.452           | 806.950 <sup>+2</sup> | 864.458           | 892.944 <sup>+2</sup> | 912.282           | 977.968 <sup>+2</sup> | 1021.491 <sup>+2</sup> | 1271.632          |                   |
| Frac. Inten. (% of TIC) | 1.42   | 0.18    | 1.64   | 4.40             | 1.65                                                  | 4.47                            | 1.87                       | 1.62                        | 5.04                | 1.71                  | 24.45                 | 1.70                  | 5.91                                                              | 1.57                  | 1.94                  | 1.55                  | 1.58              | 1.75              | 3.29                  | 2.23              | 13.67                 | 1.52              | 3.11                  | 2.97                   | 8.74              |                   |
| Rel. Inten. (% of BP)   | 5.81   | 0.74    | 6.71   | 18.00            | 6.75                                                  | 18.27                           | 7.63                       | 6.61                        | 20.60               | 7.00                  | 100.00                | 6.95                  | 24.17                                                             | 6.43                  | 7.94                  | 6.35                  | 6.48              | 7.17              | 13.44                 | 9.13              | 55.90                 | 6.23              | 12.71                 | 12.16                  | 35.75             |                   |
| Score                   | -0.05  | 0.22    | -0.07  | 0.50             | -0.07                                                 | 0.25                            | 0.50                       | 1.50                        | -0.21               | 0.50                  | 1.50                  | -0.06                 | 1.50                                                              | -0.06                 | -0.08                 | 1.50                  | -0.06             | -0.07             | 1.50                  | 1.50              | 1.50                  | 0.50              | 0.50                  | -0.13                  | -0.12             | 1.50              |
| Ion-type                |        | LJ      |        | b2               |                                                       | b3+H2O                          | b3                         | Y3                          |                     | Y11+H2O+2             | Y11 <sup>+2</sup>     | Y12 <sup>+2</sup>     | Y12 <sup>+2</sup>                                                 | Y13 <sup>+2</sup>     | Y13 <sup>+2</sup>     | Y13 <sup>+2</sup>     | Y13 <sup>+2</sup> | Y13 <sup>+2</sup> | Y14 <sup>+2</sup>     | Y14 <sup>+2</sup> | Y15 <sup>+2</sup>     | Y15 <sup>+2</sup> | Y16 <sup>+2</sup>     | Y16 <sup>+2</sup>      | Y17 <sup>+2</sup> | Y17 <sup>+2</sup> |
| Delta ppm               |        | -3.8    |        | -5.1             |                                                       | 1.2                             | -17.0                      | -7.8                        |                     | 8.5                   | 0.5                   | 0.5                   | 1.0                                                               |                       | -9.5                  |                       |                   |                   | 37.1                  | 26.0              | -0.2                  | -5.8              |                       |                        | -4.9              |                   |

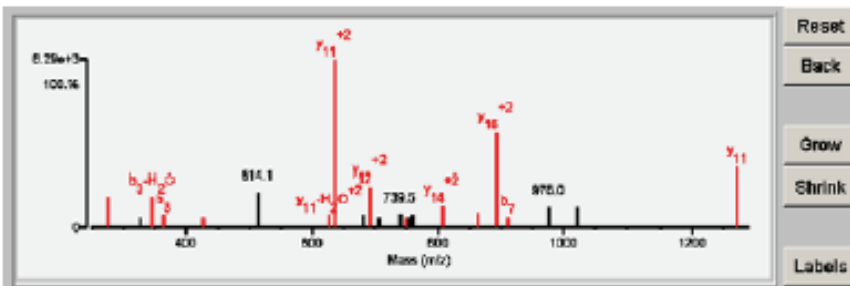

Detailed Results

| Rank                   | Score  | SPI (%) | BCS    | # Unmatched Ions | Sequence                                                              | MH <sup>+</sup> Calculated (Da) | MH <sup>+</sup> Error (Da) | MH <sup>+</sup> Error (ppm) | Protein MW/pl (Da) | Species | Accession #           | MS-Digest Index #                          | Protein Name |                       |                       |                       |                       |         |         |                       |                       |         |          |          |          |      |
|------------------------|--------|---------|--------|------------------|-----------------------------------------------------------------------|---------------------------------|----------------------------|-----------------------------|--------------------|---------|-----------------------|--------------------------------------------|--------------|-----------------------|-----------------------|-----------------------|-----------------------|---------|---------|-----------------------|-----------------------|---------|----------|----------|----------|------|
| 1                      | 19.65  | 92.3    | 9      | 4/25             | (R) L H L S G I D A N / P N A / L / F / D / P V E / F / P A P / R (G) | 2560.3017                       | 0.0249                     | 9.7                         | 273401.0/5.99      | HUMAN   | P49327<br>177585      | Fatty acid synthase - Homo sapiens (Human) |              |                       |                       |                       |                       |         |         |                       |                       |         |          |          |          |      |
| Fragment-ion (m/z)     | 70.065 | 72.081  | 84.044 | 86.097           | 120.079                                                               | 175.117                         | 212.105                    | 283.141                     | 304.164            | 440.265 | 456.744 <sup>+2</sup> | 505.278 <sup>+2</sup>                      | 587.325      | 610.813 <sup>+2</sup> | 637.799 <sup>+2</sup> | 646.308 <sup>+2</sup> | 694.317 <sup>+2</sup> | 703.353 | 708.409 | 776.401 <sup>+2</sup> | 895.443 <sup>+2</sup> | 912.486 | 1009.536 | 1156.601 | 1551.755 |      |
| Frac. Inten.(% of TIC) | 0.00   | 0.06    | 0.09   | 0.23             | 0.07                                                                  | 1.73                            | 1.85                       | 2.32                        | 1.61               | 1.79    | 1.96                  | 28.81                                      | 1.90         | 2.02                  | 2.71                  | 10.93                 | 1.86                  | 1.76    | 2.62    | 2.52                  | 1.69                  | 4.23    | 20.69    | 3.77     | 3.00     |      |
| Rel. Inten.(% of BP)   | 0.02   | 0.22    | 0.32   | 0.79             | 0.26                                                                  | 6.05                            | 6.45                       | 8.13                        | 5.61               | 6.26    | 6.86                  | 100.00                                     | 6.65         | 7.04                  | 8.47                  | 38.19                 | 6.45                  | 6.14    | 9.15    | 8.80                  | 5.90                  | 14.80   | 72.31    | 13.17    | 10.48    |      |
| Score                  | 0.20   | 0.50    | 1.00   | 0.22             | 1.00                                                                  | 1.50                            | 0.75                       | 0.75                        | -0.06              | 1.50    | 1.50                  | 1.50                                       | 1.50         | 0.50                  | 0.25                  | 0.50                  | 0.25                  | -0.06   | -0.09   | 1.50                  | -0.06                 | 1.50    | 1.50     | 1.50     | 1.50     | 0.50 |
| Ion-type               | PR     | V       | E      | LI               | F                                                                     | y1                              | PN                         | PNA                         |                    | y4      | y6 <sup>+2</sup>      | y6 <sup>+2</sup>                           | y5           | b11 <sup>+2</sup>     | b12-NH3 <sup>+2</sup> | b12 <sup>+2</sup>     | b13-NH3 <sup>+2</sup> |         |         | b14 <sup>+2</sup>     | y6                    | y6      | y9       | y10      | b14      |      |
| Delta ppm              | -6.1   | -3.8    | -3.5   | 7.8              | -14.0                                                                 | -10.0                           | 2.1                        | -1.7                        |                    | 6.6     | -14.7                 | 1.6                                        | -8.0         | 37.2                  | 5.0                   | -2.3                  | -28.7                 |         |         | 19.7                  | -8.3                  | -10.4   | -12.2    | -5.4     |          |      |

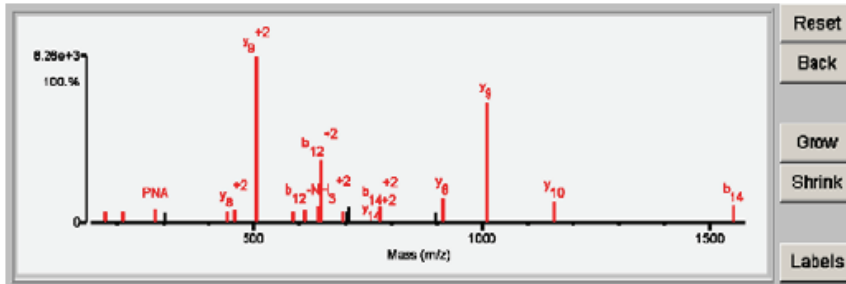

Detailed Results

| Rank                   | Score  | SPI (%) | BCS    | # Unmatched Ions | Sequence                                                    | MH <sup>+</sup> Calculated (Da) | MH <sup>+</sup> Error (Da) | MH <sup>+</sup> Error (ppm) | Protein MW/pl (Da) | Species | Accession #      | MS-Digest Index #                | Protein Name |         |         |         |         |                       |         |         |                       |         |         |                       |                       |
|------------------------|--------|---------|--------|------------------|-------------------------------------------------------------|---------------------------------|----------------------------|-----------------------------|--------------------|---------|------------------|----------------------------------|--------------|---------|---------|---------|---------|-----------------------|---------|---------|-----------------------|---------|---------|-----------------------|-----------------------|
| 1                      | 12.71  | 55.2    | 7      | 8/25             | (R) V S G Q G L E E G H T F E P A E F I / I / D / T / R (D) | 2528.1874                       | 0.0435                     | 17.2                        | 280740.4/5.71      | HUMAN   | P21333<br>186203 | Filamin-A - Homo sapiens (Human) |              |         |         |         |         |                       |         |         |                       |         |         |                       |                       |
| Fragment-ion (m/z)     | 70.065 | 72.081  | 73.027 | 84.046           | 86.097                                                      | 87.044                          | 89.061                     | 102.055                     | 110.071            | 120.080 | 133.083          | 169.097                          | 175.116      | 251.072 | 276.167 | 391.193 | 504.279 | 505.270 <sup>+3</sup> | 593.080 | 617.363 | 734.337 <sup>+2</sup> | 764.426 | 818.874 | 882.889 <sup>+2</sup> | 956.417 <sup>+2</sup> |
| Frac. Inten.(% of TIC) | 0.01   | 0.35    | 2.56   | 0.08             | 0.75                                                        | 4.35                            | 18.17                      | 0.09                        | 0.21               | 0.40    | 9.68             | 3.12                             | 4.58         | 2.34    | 12.04   | 3.52    | 7.37    | 2.79                  | 2.60    | 5.75    | 6.04                  | 3.78    | 2.28    | 4.41                  | 2.73                  |
| Rel. Inten.(% of BP)   | 0.03   | 1.93    | 14.10  | 0.43             | 4.14                                                        | 23.97                           | 100.00                     | 0.51                        | 1.14               | 2.19    | 53.30            | 17.19                            | 25.22        | 12.90   | 66.27   | 19.38   | 40.59   | 15.33                 | 14.28   | 31.83   | 33.22                 | 20.79   | 12.55   | 24.25                 | 15.02                 |
| Score                  | 0.20   | 0.50    | -0.14  |                  | 0.22                                                        | -0.24                           | -1.00                      | 1.00                        | 1.00               | 1.00    | -0.53            | 0.75                             | 1.50         | -0.13   | 1.50    | 1.50    | 1.50    | -0.15                 | -0.14   | 1.50    | 0.50                  | 1.50    | 0.50    | 0.50                  | 0.50                  |
| Ion-type               | PR     | V       |        | E                | LI                                                          |                                 |                            | E                           | H                  | F       |                  | PA                               | y1           | y2      | y3      | y4      |         |                       |         | y5      | b13 <sup>+2</sup>     | y6      |         | b16 <sup>+2</sup>     | b17 <sup>+2</sup>     |
| Delta ppm              | 1.1    | 1.7     |        |                  | 3.2                                                         |                                 |                            | 1.4                         | -0.7               | -9.0    |                  | -7.4                             | -18.0        | 2.1     | -1.7    | 2.7     |         |                       |         | 2.3     | 22.4                  | -5.0    |         | 3.0                   | -4.1                  |

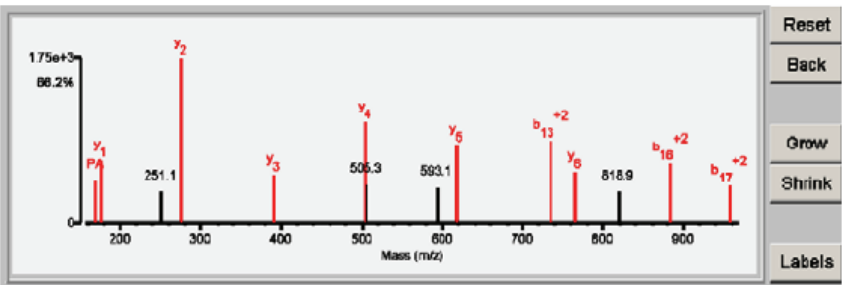

I43

Detailed Results

| Rank | Score | SPI (%) | BCS | # Unmatched Ions | Sequence                     | MH <sup>+</sup> Calculated (Da) | MH <sup>+</sup> Error (Da) | MH <sup>+</sup> Error (ppm) | Protein MWipl (Da) | Species | Accession #            | MS-Digest Index #      | Protein Name                    |
|------|-------|---------|-----|------------------|------------------------------|---------------------------------|----------------------------|-----------------------------|--------------------|---------|------------------------|------------------------|---------------------------------|
| 1    | 11.23 | 76.0    | 5   | 13/25            | (T)A/P/R/P/G/E/Y/V/I/I/R (F) | 1686.7807                       | -0.0308                    | -18.7                       | 290980.75.88       | HUMAN   | <a href="#">Q14316</a> | <a href="#">188213</a> | Flamin-C - Homo sapiens (Human) |

  

| Fragment-ion (m/z)      | 70.085 | 88.086 | 175.120 | 227.101 | 288.204 | 358.147 | 387.288 | 404.756 <sup>+2</sup> | 500.368 | 628.783 <sup>+2</sup> | 681.308 <sup>+2</sup> | 686.418 | 800.211 | 865.894 <sup>+2</sup> | 885.361 <sup>+2</sup> | 704.368 <sup>+2</sup> | 708.363 <sup>+2</sup> | 788.858 | 808.610 | 823.682 | 868.328 | 1062.682 | 1181.814 | 1279.637 | 1382.828 |
|-------------------------|--------|--------|---------|---------|---------|---------|---------|-----------------------|---------|-----------------------|-----------------------|---------|---------|-----------------------|-----------------------|-----------------------|-----------------------|---------|---------|---------|---------|----------|----------|----------|----------|
| Frac. Inten. (% of TIC) | 0.00   | 0.04   | 3.25    | 2.15    | 1.67    | 1.43    | 1.55    | 2.35                  | 1.71    | 1.52                  | 4.35                  | 1.45    | 1.58    | 0.88                  | 2.92                  | 55.93                 | 1.37                  | 7.27    | 1.11    | 1.55    | 0.89    | 1.18     | 1.21     | 1.35     | 1.28     |
| Rel. Inten. (% of BP)   | 0.00   | 0.06   | 5.80    | 3.85    | 2.99    | 2.56    | 2.78    | 4.19                  | 3.05    | 2.72                  | 7.77                  | 2.59    | 2.82    | 1.57                  | 5.22                  | 100.00                | 2.46                  | 13.00   | 1.98    | 2.78    | 1.60    | 2.11     | 2.16     | 2.44     | 2.28     |
| Score                   | 0.20   | 0.22   | 1.50    | 0.75    | 1.50    | -0.03   | -0.03   | -0.04                 | -0.03   | -0.03                 | 1.50                  | -0.03   | -0.03   | 1.50                  | 0.50                  | 1.50                  | -0.02                 | -0.13   | -0.02   | -0.02   | -0.02   | -0.02    | 1.50     | 0.50     | 0.50     |
| Ion-type                | PR     | LI     | Y1      | EP      | Y2      |         |         |                       |         |                       | Y <sup>+2</sup>       |         |         | Y10 <sup>+2</sup>     | Y11+H2O <sup>+2</sup> | Y1 <sup>+2</sup>      |                       |         |         |         |         | Y9       | b10      | b11      |          |
| Delta ppm               | -3.2   | -14.2  | 8.3     | -9.8    | 3.1     |         |         |                       |         |                       | -35.7                 |         |         | -24.4                 | -28.1                 | -25.3                 |                       |         |         |         |         | -30.0    | -38.7    | -31.4    |          |

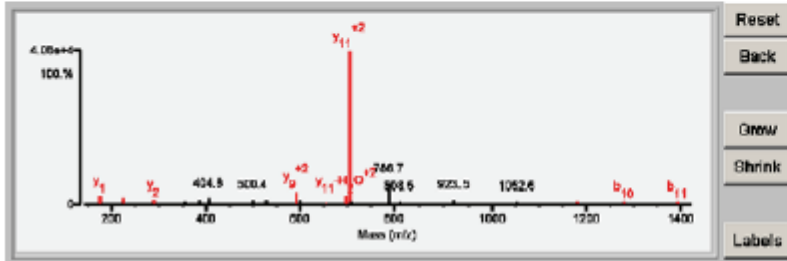

I44

Detailed Results

| Rank | Score | SPI (%) | BCS | # Unmatched Ions | Sequence                                  | MH <sup>+</sup> Calculated (Da) | MH <sup>+</sup> Error (Da) | MH <sup>+</sup> Error (ppm) | Protein MWipl (Da) | Species | Accession #            | MS-Digest Index #      | Protein Name                                                                    |
|------|-------|---------|-----|------------------|-------------------------------------------|---------------------------------|----------------------------|-----------------------------|--------------------|---------|------------------------|------------------------|---------------------------------------------------------------------------------|
| 1    | 11.64 | 62.2    | 4   | 8/25             | (L)F/S/L/S/A/G/V/T/Q/E/LA/I/S/R/R/Q/R (R) | 2178.1448                       | 0.0193                     | 8.8                         | 50708.718.70       | HUMAN   | <a href="#">O14764</a> | <a href="#">201489</a> | Gamma-aminobutyric acid receptor subunit delta precursor - Homo sapiens (Human) |

  

| Fragment-ion (m/z)      | 70.066 | 72.081 | 84.043 | 86.097 | 101.069 | 102.055 | 129.063 | 175.118 | 240.097 | 243.133 | 258.105 | 408.245 <sup>+2</sup> | 464.772 <sup>+2</sup> | 529.310 <sup>+2</sup> | 560.313 | 628.844 <sup>+2</sup> | 702.375 | 810.924 <sup>+2</sup> | 815.465 | 851.422 | 922.471 | 928.550 | 993.504 | 1057.590 | 1121.572 |
|-------------------------|--------|--------|--------|--------|---------|---------|---------|---------|---------|---------|---------|-----------------------|-----------------------|-----------------------|---------|-----------------------|---------|-----------------------|---------|---------|---------|---------|---------|----------|----------|
| Frac. Inten. (% of TIC) | 0.00   | 0.08   | 0.10   | 0.59   | 0.09    | 0.08    | 2.10    | 5.22    | 4.20    | 3.36    | 1.97    | 2.61                  | 4.34                  | 3.88                  | 8.65    | 6.10                  | 6.49    | 2.18                  | 12.85   | 6.64    | 8.21    | 9.18    | 5.24    | 3.74     | 2.13     |
| Rel. Inten. (% of BP)   | 0.02   | 0.63   | 0.75   | 4.58   | 0.73    | 0.60    | 16.32   | 40.58   | 32.69   | 26.17   | 15.32   | 20.30                 | 33.78                 | 30.17                 | 67.28   | 47.47                 | 50.53   | 16.84                 | 100.00  | 51.67   | 63.88   | 71.41   | 40.77   | 29.12    | 16.58    |
| Score                   | 0.20   | 0.50   | 1.00   | 0.22   | 0.50    |         | 0.75    | 1.50    | 0.50    | 0.75    | 0.75    | 1.50                  | 1.50                  | -0.30                 | -0.67   | 1.50                  | -0.51   | -0.17                 | 1.50    | 1.50    | 1.50    | 1.50    | -0.41   | -0.29    | -0.17    |
| Ion-type                | PR     | V      | E      | LI     | QK      |         | E       | QKR     | QE-H2O  | EL      | QE      | Y6 <sup>+2</sup>      | Y++17 <sup>+2</sup>   |                       |         | Y10 <sup>+2</sup>     |         |                       | Y6      |         | b9      | Y++17   |         |          |          |
| Delta ppm               | 5.3    | 0.3    | -15.4  | 7.8    | -22.2   | -33.0   |         | -22.9   | -6.6    | -9.5    | -7.5    | -16.8                 | -16.8                 | 11.0                  |         | -29.3                 |         |                       | -38.4   |         | 36.6    | 25.1    |         |          |          |

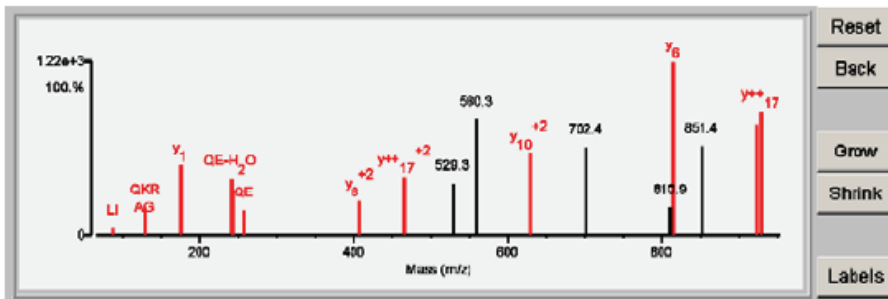

145

Detailed Results

| Rank                    | Score  | SPI (%) | BCS    | # Unmatched Ions | Sequence                       | MH <sup>+</sup> Calculated (Da) | MH <sup>+</sup> Error (Da) | MH <sup>+</sup> Error (ppm) | Protein MW/Pl (Da) | Species | Accession #            | MS-Digest Index #      | Protein Name                                                 |         |                  |                       |         |                       |         |                    |         |         |         |         |         |
|-------------------------|--------|---------|--------|------------------|--------------------------------|---------------------------------|----------------------------|-----------------------------|--------------------|---------|------------------------|------------------------|--------------------------------------------------------------|---------|------------------|-----------------------|---------|-----------------------|---------|--------------------|---------|---------|---------|---------|---------|
| 1                       | 14.48  | 78.3    | 5      | 8/26             | (L)I I A I I I E E A A L/R (S) | 1067.8074                       | 0.0031                     | 2.9                         | 60508.715.88       | HUMAN   | <a href="#">Q8P631</a> | <a href="#">208541</a> | Gamma-glutamyltransferase 5 precursor - Homo sapiens (Human) |         |                  |                       |         |                       |         |                    |         |         |         |         |         |
| Fragment-ion (m/z)      | 88.097 | 87.100  | 88.084 | 157.134          | 174.090                        | 176.116                         | 185.131                    | 202.089                     | 272.121            | 273.124 | 274.128                | 275.123                | 288.208                                                      | 367.179 | 388.207          | 389.245 <sup>+2</sup> | 401.281 | 423.784 <sup>+2</sup> | 600.364 | 615.378            | 654.384 | 672.400 | 674.406 | 785.483 | 858.618 |
| Frac. Inten. (% of TIC) | 0.47   | 1.84    | 1.00   | 4.58             | 4.16                           | 2.55                            | 1.45                       | 7.94                        | 0.91               | 9.82    | 1.85                   | 0.84                   | 1.38                                                         | 1.48    | 2.71             | 0.93                  | 1.52    | 1.09                  | 5.81    | 3.69               | 1.18    | 28.26   | 2.70    | 7.31    | 4.51    |
| Rel. Inten. (% of BP)   | 1.67   | 6.50    | 3.54   | 16.22            | 14.73                          | 9.02                            | 5.15                       | 28.08                       | 3.22               | 34.76   | 6.54                   | 2.99                   | 4.89                                                         | 5.24    | 9.59             | 3.28                  | 5.38    | 3.86                  | 20.56   | 13.07              | 4.17    | 100.00  | 9.56    | 25.87   | 15.94   |
| Score                   | 0.22   | -0.05   | -0.04  | 0.50             | 0.50                           | 1.50                            | 0.75                       | 0.50                        | 0.75               | 0.50    | -0.07                  | -0.03                  | 1.50                                                         | -0.05   | 0.50             | 1.50                  | -0.05   | 1.50                  | -0.21   | -0.13              | 0.50    | 1.50    | -0.10   | 1.50    | 1.50    |
| Ion-type                | LI     |         |        | AL-28            | a1                             | y1                              | AL                         | b1                          | EAA                |         |                        |                        | y2                                                           | b3      | y7 <sup>+2</sup> | y8 <sup>+2</sup>      |         |                       |         | y6 <sup>+2</sup> O | y6      |         |         | y7      | y8      |
| Delta ppm               | 2.0    |         |        | -7.2             | -14.4                          | -20.3                           | 8.4                        | -7.5                        | -15.4              | -15.1   |                        |                        | 9.7                                                          |         | -11.9            | -5.9                  |         | -4.2                  |         | 0.3                | -5.4    |         |         | -6.3    | -8.7    |

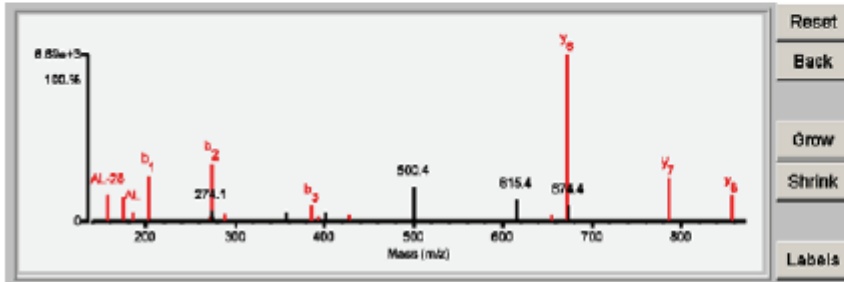

146

Detailed Results

| Rank                    | Score   | SPI (%) | BCS     | # Unmatched Ions | Sequence                               | MH <sup>+</sup> Calculated (Da) | MH <sup>+</sup> Error (Da) | MH <sup>+</sup> Error (ppm) | Protein MW/Pl (Da) | Species | Accession #            | MS-Digest Index #      | Protein Name                                                |                       |         |                       |                       |         |                       |         |         |         |         |          |          |
|-------------------------|---------|---------|---------|------------------|----------------------------------------|---------------------------------|----------------------------|-----------------------------|--------------------|---------|------------------------|------------------------|-------------------------------------------------------------|-----------------------|---------|-----------------------|-----------------------|---------|-----------------------|---------|---------|---------|---------|----------|----------|
| 1                       | 19.71   | 91.5    | 10      | 3/25             | (L)I S G D T I Q/T/D/A/T/S/F/Y D/R (V) | 1764.7381                       | 0.0092                     | 5.2                         | 59425.8/4.33       | HUMAN   | <a href="#">P14314</a> | <a href="#">216087</a> | Glucosidase 2 subunit beta precursor - Homo sapiens (Human) |                       |         |                       |                       |         |                       |         |         |         |         |          |          |
| Fragment-ion (m/z)      | 174.094 | 175.120 | 202.092 | 260.089          | 271.109                                | 326.189                         | 343.119                    | 361.136                     | 453.211            | 489.191 | 562.214                | 600.273                | 687.309                                                     | 701.796 <sup>+2</sup> | 705.259 | 756.284 <sup>+2</sup> | 764.324 <sup>+2</sup> | 773.312 | 781.796 <sup>+2</sup> | 788.342 | 859.398 | 974.410 | 977.397 | 1075.464 | 1203.519 |
| Frac. Inten. (% of TIC) | 4.38    | 3.84    | 2.86    | 5.72             | 2.09                                   | 3.19                            | 2.12                       | 1.75                        | 5.80               | 2.21    | 5.02                   | 5.16                   | 7.92                                                        | 2.24                  | 1.68    | 2.01                  | 3.33                  | 2.47    | 3.89                  | 5.91    | 4.43    | 6.05    | 1.82    | 10.73    | 3.49     |
| Rel. Inten. (% of BP)   | 40.67   | 35.78   | 26.68   | 53.29            | 19.44                                  | 29.72                           | 19.80                      | 16.34                       | 54.09              | 20.62   | 46.80                  | 48.07                  | 73.77                                                       | 20.92                 | 15.88   | 18.73                 | 30.99                 | 23.01   | 34.38                 | 55.08   | 41.25   | 56.42   | 17.89   | 100.00   | 32.60    |
| Score                   | 0.50    | 1.50    | 0.50    | 0.75             | 0.25                                   | -0.30                           | 0.50                       | 0.75                        | 1.50               | 0.75    | 0.50                   | 1.50                   | 1.50                                                        | 0.50                  | 0.75    | -0.19                 | -0.31                 | 0.25    | 0.50                  | 1.50    | 1.50    | 1.50    | 0.50    | 1.50     | 1.50     |
| Ion-type                | a1      | y1      | b1      | SGD              | b2-H2O                                 |                                 | SGDT-H2O                   | SGDT                        | y3                 | b+++    | b5                     | y4                     | y5                                                          | y12-NH3 <sup>+2</sup> | SGDTQTD |                       |                       | b7-H2O  | a14 <sup>+2</sup>     | y6      | y7      | y8      | b9      | y9       | y10      |
| Delta ppm               | -11.0   | 6.0     | 6.8     | -1.2             | -10.3                                  |                                 | -19.0                      | -1.9                        | 4.4                | -14.9   | -8.1                   | -7.4                   | -1.3                                                        | -7.7                  | -15.3   |                       |                       | -3.3    | -30.3                 | -19.2   | 4.8     | -11.3   | 7.8     | -4.4     | -6.9     |

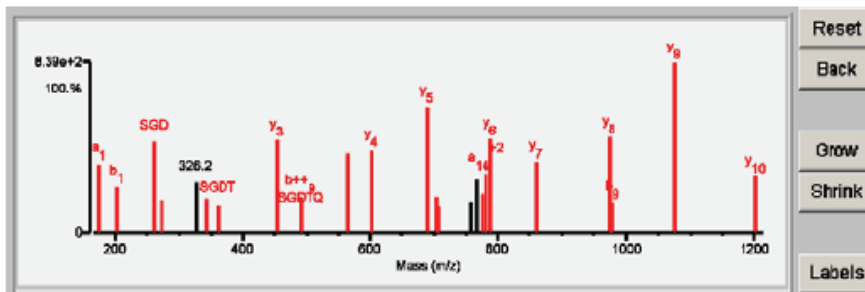

147

Detailed Results

| Rank | Score | SPI (%) | BCS | # Unmatched Ions | Sequence                            | MH <sup>+</sup> Calculated (Da) | MH <sup>+</sup> Error (Da) | MH <sup>+</sup> Error (ppm) | Protein MW/pi (Da) | Species | Accession # | MS-Digest Index # | Protein Name                                       |
|------|-------|---------|-----|------------------|-------------------------------------|---------------------------------|----------------------------|-----------------------------|--------------------|---------|-------------|-------------------|----------------------------------------------------|
| 1    | 10.88 | 88.3    | 8   | 11/25            | (C) L D A I F F L L S A Y V G R (L) | 1608.7770                       | -0.0011                    | -0.7                        | 23358.016.43       | HUMAN   | P08211      | 227825            | Glutathione S-transferase P - Homo sapiens (Human) |

  

| Fragment-ion (m/z)      | 70.066 | 86.078 | 88.093 | 102.084 | 138.073 | 174.089        | 183.149 | 202.087        | 211.148 | 289.188 | 317.114        | 358.182 | 380.168        | 388.160        | 488.280 | 682.327 | 678.338 | 843.298 | 862.342        | 853.394* | 877.314 | 701.723 | 786.402        | 875.668        | 1122.842        |
|-------------------------|--------|--------|--------|---------|---------|----------------|---------|----------------|---------|---------|----------------|---------|----------------|----------------|---------|---------|---------|---------|----------------|----------|---------|---------|----------------|----------------|-----------------|
| Frac. Inten. (% of TIC) | 0.00   | 2.22   | 5.35   | 2.93    | 0.06    | 2.46           | 2.22    | 4.52           | 2.25    | 3.18    | 7.74           | 2.24    | 5.10           | 12.52          | 3.21    | 2.99    | 2.44    | 2.61    | 4.63           | 2.25     | 2.66    | 2.87    | 2.39           | 17.77          | 3.37            |
| Rel. Inten. (% of BP)   | 0.02   | 12.48  | 30.11  | 16.51   | 0.36    | 13.97          | 12.50   | 25.46          | 12.59   | 17.98   | 43.65          | 12.60   | 29.68          | 70.43          | 18.06   | 16.84   | 13.73   | 14.68   | 26.04          | 12.71    | 14.99   | 16.13   | 13.43          | 100.00         | 18.96           |
| Score                   | 0.20   | -0.12  | -0.30  | -0.17   | 1.00    | 0.50           | 0.50    | 0.75           | 0.75    | -0.18   | 0.50           | -0.13   | 0.50           | 0.50           | 1.50    | -0.17   | -0.14   | -0.15   | 1.50           | -0.13    | -0.15   | -0.16   | 1.50           | 1.50           | 1.50            |
| Ion-type                | PR     |        |        |         | Y       | a <sub>1</sub> | PL-28   | b <sub>1</sub> | PL      |         | b <sub>2</sub> |         | a <sub>3</sub> | b <sub>5</sub> | y++g    |         |         |         | y <sub>6</sub> |          |         |         | y <sub>7</sub> | y <sub>9</sub> | y <sub>10</sub> |
| Delta ppm               | -3.2   |        |        |         | -19.0   | -36.8          | -9.8    | -20.4          | 5.2     |         | -11.2          |         | -6.3           | -12.1          | -9.1    |         |         |         | 0.3            |          |         |         | -30.5          | -6.0           | 10.0            |

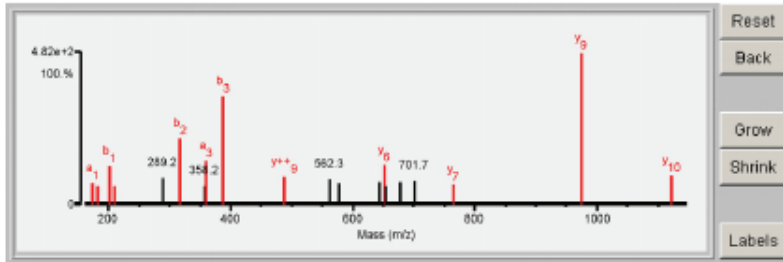

148

Detailed Results

| Rank | Score | SPI (%) | BCS | # Unmatched Ions | Sequence                              | MH <sup>+</sup> Calculated (Da) | MH <sup>+</sup> Error (Da) | MH <sup>+</sup> Error (ppm) | Protein MW/pi (Da) | Species | Accession # | MS-Digest Index # | Protein Name                                                    |
|------|-------|---------|-----|------------------|---------------------------------------|---------------------------------|----------------------------|-----------------------------|--------------------|---------|-------------|-------------------|-----------------------------------------------------------------|
| 1    | 11.45 | 73.4    | 7   | 8/24             | (R) V P T A N V S I V V D L T C R (L) | 1561.7713                       | 0.0170                     | 10.9                        | 36053.4/8.57       | HUMAN   | P04406      | 195407            | Glyceraldehyde-3-phosphate dehydrogenase - Homo sapiens (Human) |

  

| Fragment-ion (m/z)      | 70.065 | 72.081 | 86.095 | 94.067 | 110.070 | 120.082 | 136.075 | 175.120        | 181.095 | 187.111 | 215.100 | 252.134 | 316.141 | 370.174              | 379.181 | 492.259        | 543.277        | 571.258        | 607.292        | 706.362        | 721.337 | 739.341                          | 805.434        | 839.415                         |
|-------------------------|--------|--------|--------|--------|---------|---------|---------|----------------|---------|---------|---------|---------|---------|----------------------|---------|----------------|----------------|----------------|----------------|----------------|---------|----------------------------------|----------------|---------------------------------|
| Frac. Inten. (% of TIC) | 0.01   | 0.89   | 0.80   | 3.17   | 5.27    | 2.84    | 2.73    | 8.58           | 2.82    | 2.57    | 2.46    | 3.26    | 2.56    | 3.43                 | 8.44    | 6.80           | 2.45           | 4.37           | 15.48          | 8.13           | 3.90    | 3.82                             | 3.08           | 2.58                            |
| Rel. Inten. (% of BP)   | 0.04   | 5.78   | 3.90   | 20.51  | 34.08   | 18.40   | 17.66   | 55.36          | 18.27   | 16.80   | 15.92   | 21.07   | 16.57   | 22.19                | 64.62   | 42.70          | 15.86          | 28.25          | 100.00         | 52.58          | 26.22   | 24.72                            | 19.91          | 16.70                           |
| Score                   | 0.20   | 0.50   | 0.22   | -0.21  | -0.34   | -0.18   | -0.18   | 1.50           | -0.18   | 0.75    | 0.75    | -0.21   | -0.17   | 0.25                 | 1.50    | 0.50           | 0.50           | 1.50           | 1.50           | 1.50           | -0.25   | 0.25                             | 1.50           | 0.25                            |
| Ion-type                | PR     | V      | LI     |        |         |         |         | y <sub>1</sub> |         | SV      | VD      |         |         | b+++H <sub>2</sub> O | b+++    | y <sub>4</sub> | a <sub>5</sub> | b <sub>5</sub> | y <sub>6</sub> | y <sub>6</sub> |         | b <sub>7</sub> -H <sub>2</sub> O | y <sub>7</sub> | b <sub>8</sub> -NH <sub>3</sub> |
| Delta ppm               | -1.8   | -1.0   | -11.9  |        |         |         |         | 4.3            |         | 10.6    | -18.3   |         |         | -5.6                 | -2.5    | -1.6           | 29.4           | 3.8            | 8.7            | 9.3            |         | -6.1                             | 13.5           | 21.0                            |

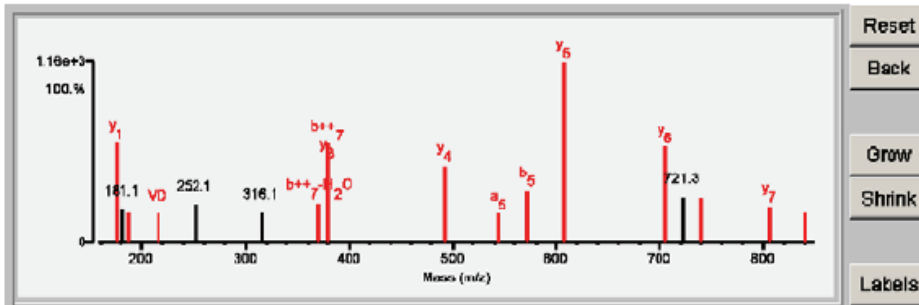

Detailed Results

| Rank | Score | SPI (%) | BCS | # Unmatched Ions | Sequence                            | MH <sup>+</sup> Calculated (Da) | MH <sup>+</sup> Error (Da) | MH <sup>+</sup> Error (ppm) | Protein MW/pI (Da) | Species | Accession #            | MS-Digest Index #      | Protein Name                                                                     |
|------|-------|---------|-----|------------------|-------------------------------------|---------------------------------|----------------------------|-----------------------------|--------------------|---------|------------------------|------------------------|----------------------------------------------------------------------------------|
| 1    | 10.41 | 55.9    | 7   | 13/25            | (G) K I L T / G / M / A / F / R (V) | 1146.5257                       | 0.0048                     | 4.2                         | 44501.4/8.39       | HUMAN   | <a href="#">O14556</a> | <a href="#">195271</a> | Glyceraldehyde-3-phosphate dehydrogenase, testis-specific - Homo sapiens (Human) |
| 1    | 10.41 | 55.9    | 7   | 13/25            | (G) K I L T / G / M / A / F / R (V) | 1146.5257                       | 0.0048                     | 4.2                         | 36053.4/8.57       | HUMAN   | <a href="#">P04406</a> | <a href="#">195407</a> | Glyceraldehyde-3-phosphate dehydrogenase - Homo sapiens (Human)                  |

  

| Fragment-ion (m/z)      | 70.065 | 72.079 | 84.081 | 86.096 | 87.101 | 94.065 | 104.052 | 116.053 | 120.082 | 158.090 | 175.115 | 187.143 | 259.048 | 322.193 | 352.119 | 372.135 | 384.201 <sup>+2</sup> | 393.215 | 512.195 | 518.232 | 524.247 | 581.286 | 682.331 | 795.414 | 1053.465 |
|-------------------------|--------|--------|--------|--------|--------|--------|---------|---------|---------|---------|---------|---------|---------|---------|---------|---------|-----------------------|---------|---------|---------|---------|---------|---------|---------|----------|
| Frac. Inten. (% of TIC) | 0.00   | 3.63   | 4.67   | 0.38   | 3.55   | 7.51   | 2.23    | 3.72    | 0.07    | 2.30    | 3.22    | 2.14    | 2.10    | 1.74    | 3.42    | 3.08    | 1.73                  | 4.59    | 2.08    | 2.02    | 3.97    | 12.22   | 17.54   | 6.45    | 5.87     |
| Rel. Inten. (% of BP)   | 0.02   | 20.11  | 26.04  | 2.19   | 20.22  | 42.80  | 12.89   | 21.24   | 0.42    | 13.14   | 18.33   | 12.18   | 11.95   | 9.94    | 19.49   | 17.57   | 9.84                  | 26.17   | 11.77   | 11.53   | 22.82   | 89.87   | 100.00  | 38.80   | 33.48    |
| Score                   | 0.20   | -0.20  | -0.26  | 0.22   | -0.20  | -0.43  | -0.13   | -0.21   | 1.00    | 0.60    | 1.50    | -0.12   | -0.12   | 1.50    | 0.50    | -0.18   | -0.10                 | 1.50    | -0.12   | -0.12   | 1.50    | 1.50    | 1.50    | 1.50    | -0.33    |
| Ion-type                | PR     |        |        | LI     |        |        |         | F       | y1      | y1-NH3  | y1      |         | y2      | b1      |         |         | y3                    |         | y4      | y5      | y6      | y7      |         |         |          |
| Delta ppm               | -0.4   |        |        | -1.5   |        |        |         | 12.7    |         | -16.5   | -23.7   |         |         | 19.0    | 7.7     |         |                       | -24.4   |         | -33.9   | -0.4    | -4.7    | -5.6    |         |          |

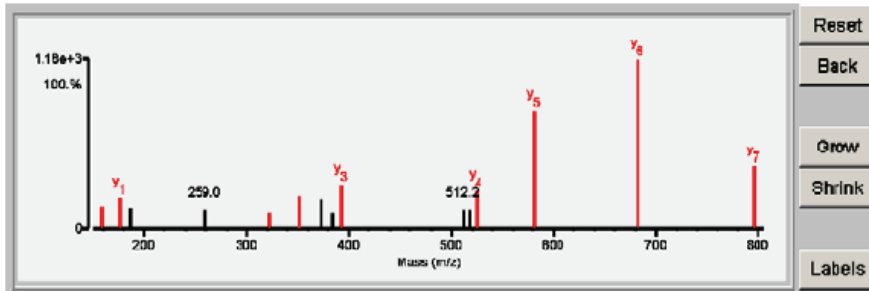

Detailed Results

| Rank | Score | SPI (%) | BCS | # Unmatched Ions | Sequence                        | MH <sup>+</sup> Calculated (Da) | MH <sup>+</sup> Error (Da) | MH <sup>+</sup> Error (ppm) | Protein MW/pI (Da) | Species | Accession #            | MS-Digest Index #      | Protein Name                                                |
|------|-------|---------|-----|------------------|---------------------------------|---------------------------------|----------------------------|-----------------------------|--------------------|---------|------------------------|------------------------|-------------------------------------------------------------|
| 1    | 10.33 | 59.0    | 6   | 10/25            | (E) P V I E I K / A / L / R (D) | 1035.5114                       | 0.0033                     | 3.2                         | 70375.4/5.76       | HUMAN   | <a href="#">P34931</a> | <a href="#">252853</a> | Heat shock 70 kDa protein 1L - Homo sapiens (Human)         |
| 1    | 10.33 | 59.0    | 6   | 10/25            | (E) P V I E I K / A / L / R (D) | 1035.5114                       | 0.0033                     | 3.2                         | 70052.6/5.48       | HUMAN   | <a href="#">P08107</a> | <a href="#">255973</a> | Heat shock 70 kDa protein 1 - Homo sapiens (Human)          |
| 1    | 10.33 | 59.0    | 6   | 10/25            | (E) P V I E I K / A / L / R (D) | 1035.5114                       | 0.0033                     | 3.2                         | 70021.3/5.56       | HUMAN   | <a href="#">P54652</a> | <a href="#">256011</a> | Heat shock-related 70 kDa protein 2 - Homo sapiens (Human)  |
| 1    | 10.33 | 59.0    | 6   | 10/25            | (E) P V I E I K / A / L / R (D) | 1035.5114                       | 0.0033                     | 3.2                         | 71028.5/5.81       | HUMAN   | <a href="#">P17066</a> | <a href="#">256079</a> | Heat shock 70 kDa protein 6 - Homo sapiens (Human)          |
| 1    | 10.33 | 59.0    | 6   | 10/25            | (E) P V I E I K / A / L / R (D) | 1035.5114                       | 0.0033                     | 3.2                         | 40244.6/7.72       | HUMAN   | <a href="#">P48741</a> | <a href="#">256087</a> | Putative heat shock 70 kDa protein 7 - Homo sapiens (Human) |
| 1    | 10.33 | 59.0    | 6   | 10/25            | (D) P V I E I K / A / L / R (D) | 1035.5114                       | 0.0033                     | 3.2                         | 70898.4/5.38       | HUMAN   | <a href="#">P11142</a> | <a href="#">256121</a> | Heat shock cognate 71 kDa protein - Homo sapiens (Human)    |

  

| Fragment-ion (m/z)      | 70.066 | 72.080 | 84.044 | 86.096 | 94.067 | 158.062 | 175.120 | 186.058 | 187.059 | 257.125 | 285.127 | 288.203 | 342.202 | 353.130 | 359.239 | 414.160 | 487.337 | 529.292 | 616.372 | 622.347 | 640.341 | 658.336 | 751.392 | 757.393 | 942.442 |
|-------------------------|--------|--------|--------|--------|--------|---------|---------|---------|---------|---------|---------|---------|---------|---------|---------|---------|---------|---------|---------|---------|---------|---------|---------|---------|---------|
| Frac. Inten. (% of TIC) | 0.01   | 0.05   | 0.04   | 0.13   | 6.56   | 19.59   | 6.86    | 17.82   | 2.49    | 1.23    | 3.63    | 1.91    | 1.48    | 1.32    | 2.58    | 1.58    | 1.63    | 3.96    | 2.01    | 1.24    | 2.12    | 10.94   | 1.90    | 6.14    | 3.76    |
| Rel. Inten. (% of BP)   | 0.08   | 0.25   | 0.19   | 0.84   | 33.46  | 100.00  | 29.91   | 90.66   | 12.99   | 6.28    | 18.51   | 9.77    | 7.54    | 6.75    | 13.15   | 8.08    | 6.31    | 20.22   | 10.28   | 6.33    | 10.91   | 55.63   | 9.72    | 31.32   | 19.34   |
| Score                   | 0.23   | 0.50   | 1.00   | 0.22   | -0.33  | 0.50    | 1.50    | 0.50    | -0.13   | 0.50    | 0.60    | 1.50    | 0.50    | -0.07   | 1.50    | 0.50    | -0.08   | -0.20   | -0.10   | 1.50    | -0.11   | -0.56   | 1.50    | -0.31   | -0.19   |
| Ion-type                | PR     | V      | E      | LI     |        | ai      | y1      | b1      |         | ac      | b2      | y2      | y3-NH3  |         | b3      |         | y4      |         | y4      | y5      | y5      |         |         |         |         |
| Delta ppm               | 12.5   | -16.3  | -3.5   | -0.3   |        | -13.3   | 6.8     | -8.7    |         | -29.6   | -2.9    | -1.1    | -34.1   |         | -4.3    | -24.9   |         |         |         | -4.0    |         |         | -0.3    |         |         |

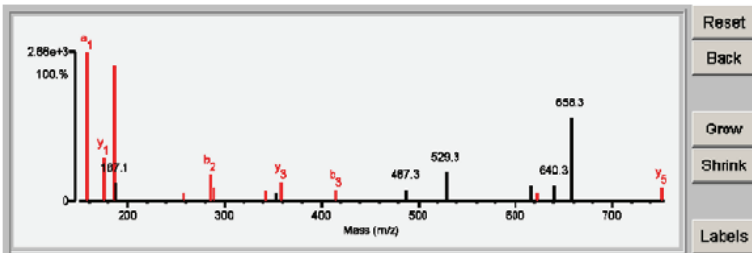



151

Detailed Results

| Rank                                                                                                                                                                                                                                                                                                                                                                                                                                                                                                                                                                                                                                                                                                                                                                                                                                                                                                                                                                                                                                                                                                                                                                                                                                                                                                                                                                                                                                                                                                                                                                                                                                                                                                                                                                                                                                                                                                                                                                                                                                                                                                                                                                                                                                                                                                                                                                                                                                                                                                | Score   | SPI (%) | BCS     | # Unmatched Ions | Sequence                            | MH <sup>+</sup> Calculated (Da) | MH <sup>+</sup> Error (Da) | MH <sup>+</sup> Error (ppm) | Protein MW/pi (Da) | Species | Accession #           | MS-Digest Index # | Protein Name                                       |                    |         |         |         |         |                       |         |                       |         |         |          |                       |         |         |         |         |         |         |         |                       |         |         |         |         |          |          |                         |      |      |      |      |      |      |      |      |      |      |      |      |      |      |       |      |      |      |      |      |       |      |      |      |      |                       |       |       |       |       |       |       |       |       |       |       |       |       |       |       |       |       |       |       |       |       |        |       |       |       |       |       |       |      |       |      |       |      |       |       |       |      |       |       |       |      |      |       |       |       |       |       |      |      |      |      |      |          |  |    |  |     |  |    |  |    |  |    |  |    |  |    |    |  |  |  |  |  |    |    |    |     |     |           |  |     |  |       |  |       |  |      |  |  |  |  |  |       |      |  |  |  |  |  |      |      |     |     |       |
|-----------------------------------------------------------------------------------------------------------------------------------------------------------------------------------------------------------------------------------------------------------------------------------------------------------------------------------------------------------------------------------------------------------------------------------------------------------------------------------------------------------------------------------------------------------------------------------------------------------------------------------------------------------------------------------------------------------------------------------------------------------------------------------------------------------------------------------------------------------------------------------------------------------------------------------------------------------------------------------------------------------------------------------------------------------------------------------------------------------------------------------------------------------------------------------------------------------------------------------------------------------------------------------------------------------------------------------------------------------------------------------------------------------------------------------------------------------------------------------------------------------------------------------------------------------------------------------------------------------------------------------------------------------------------------------------------------------------------------------------------------------------------------------------------------------------------------------------------------------------------------------------------------------------------------------------------------------------------------------------------------------------------------------------------------------------------------------------------------------------------------------------------------------------------------------------------------------------------------------------------------------------------------------------------------------------------------------------------------------------------------------------------------------------------------------------------------------------------------------------------------|---------|---------|---------|------------------|-------------------------------------|---------------------------------|----------------------------|-----------------------------|--------------------|---------|-----------------------|-------------------|----------------------------------------------------|--------------------|---------|---------|---------|---------|-----------------------|---------|-----------------------|---------|---------|----------|-----------------------|---------|---------|---------|---------|---------|---------|---------|-----------------------|---------|---------|---------|---------|----------|----------|-------------------------|------|------|------|------|------|------|------|------|------|------|------|------|------|------|-------|------|------|------|------|------|-------|------|------|------|------|-----------------------|-------|-------|-------|-------|-------|-------|-------|-------|-------|-------|-------|-------|-------|-------|-------|-------|-------|-------|-------|-------|--------|-------|-------|-------|-------|-------|-------|------|-------|------|-------|------|-------|-------|-------|------|-------|-------|-------|------|------|-------|-------|-------|-------|-------|------|------|------|------|------|----------|--|----|--|-----|--|----|--|----|--|----|--|----|--|----|----|--|--|--|--|--|----|----|----|-----|-----|-----------|--|-----|--|-------|--|-------|--|------|--|--|--|--|--|-------|------|--|--|--|--|--|------|------|-----|-----|-------|
| 1                                                                                                                                                                                                                                                                                                                                                                                                                                                                                                                                                                                                                                                                                                                                                                                                                                                                                                                                                                                                                                                                                                                                                                                                                                                                                                                                                                                                                                                                                                                                                                                                                                                                                                                                                                                                                                                                                                                                                                                                                                                                                                                                                                                                                                                                                                                                                                                                                                                                                                   | 13.06   | 62.2    | 10      | 14/25            | (S) V M D A T Q I A G L N C L R (L) | 1592.7593                       | 0.0304                     | 19.1                        | 94300.5/5.18       | HUMAN   | P34932                | 256043            | Heat shock 70 kDa protein 4 - Homo sapiens (Human) |                    |         |         |         |         |                       |         |                       |         |         |          |                       |         |         |         |         |         |         |         |                       |         |         |         |         |          |          |                         |      |      |      |      |      |      |      |      |      |      |      |      |      |      |       |      |      |      |      |      |       |      |      |      |      |                       |       |       |       |       |       |       |       |       |       |       |       |       |       |       |       |       |       |       |       |       |        |       |       |       |       |       |       |      |       |      |       |      |       |       |       |      |       |       |       |      |      |       |       |       |       |       |      |      |      |      |      |          |  |    |  |     |  |    |  |    |  |    |  |    |  |    |    |  |  |  |  |  |    |    |    |     |     |           |  |     |  |       |  |       |  |      |  |  |  |  |  |       |      |  |  |  |  |  |      |      |     |     |       |
| <table border="1"> <thead> <tr> <th>Fragment-ion (m/z)</th> <th>159.111</th> <th>175.120</th> <th>187.101</th> <th>343.186</th> <th>372.222</th> <th>391.205</th> <th>443.195<sup>+2</sup></th> <th>477.214</th> <th>486.209</th> <th>505.255</th> <th>513.094<sup>+2</sup></th> <th>542.186</th> <th>602.641</th> <th>618.322</th> <th>675.357</th> <th>715.308</th> <th>715.708</th> <th>720.251</th> <th>721.078<sup>+2</sup></th> <th>742.308</th> <th>746.394</th> <th>859.495</th> <th>987.544</th> <th>1088.593</th> <th>1274.623</th> </tr> </thead> <tbody> <tr> <td>Frac. Inten. (% of TIC)</td> <td>6.37</td> <td>3.24</td> <td>4.38</td> <td>1.98</td> <td>1.83</td> <td>1.79</td> <td>1.77</td> <td>1.80</td> <td>3.35</td> <td>3.86</td> <td>2.44</td> <td>1.97</td> <td>2.87</td> <td>4.54</td> <td>12.59</td> <td>2.79</td> <td>1.76</td> <td>2.01</td> <td>2.11</td> <td>2.39</td> <td>14.05</td> <td>6.38</td> <td>4.87</td> <td>6.60</td> <td>2.27</td> </tr> <tr> <td>Rel. Inten. (% of BP)</td> <td>45.38</td> <td>23.05</td> <td>31.18</td> <td>13.95</td> <td>13.05</td> <td>12.76</td> <td>12.57</td> <td>12.85</td> <td>23.83</td> <td>27.48</td> <td>17.41</td> <td>14.02</td> <td>20.45</td> <td>32.34</td> <td>89.82</td> <td>19.84</td> <td>12.52</td> <td>14.31</td> <td>15.06</td> <td>16.99</td> <td>100.00</td> <td>45.45</td> <td>34.70</td> <td>47.02</td> <td>16.16</td> </tr> <tr> <td>Score</td> <td>-0.45</td> <td>1.50</td> <td>-0.31</td> <td>0.75</td> <td>-0.13</td> <td>1.50</td> <td>-0.13</td> <td>-0.13</td> <td>-0.24</td> <td>1.50</td> <td>-0.17</td> <td>-0.14</td> <td>-0.20</td> <td>1.50</td> <td>1.50</td> <td>-0.20</td> <td>-0.13</td> <td>-0.14</td> <td>-0.15</td> <td>-0.17</td> <td>1.50</td> <td>1.50</td> <td>1.50</td> <td>1.50</td> <td>1.50</td> </tr> <tr> <td>Ion-type</td> <td></td> <td>Y1</td> <td></td> <td>TQ1</td> <td></td> <td>Y3</td> <td></td> <td>Y4</td> <td></td> <td>Y5</td> <td></td> <td>Y6</td> <td></td> <td>Y5</td> <td>Y6</td> <td></td> <td></td> <td></td> <td></td> <td></td> <td>Y7</td> <td>Y8</td> <td>Y9</td> <td>Y10</td> <td>Y12</td> </tr> <tr> <td>Delta ppm</td> <td></td> <td>4.3</td> <td></td> <td>-38.2</td> <td></td> <td>-19.7</td> <td></td> <td>-0.8</td> <td></td> <td></td> <td></td> <td></td> <td></td> <td>-28.0</td> <td>-5.7</td> <td></td> <td></td> <td></td> <td></td> <td></td> <td>-4.5</td> <td>15.2</td> <td>4.0</td> <td>4.1</td> <td>-23.2</td> </tr> </tbody> </table> |         |         |         |                  |                                     |                                 |                            |                             |                    |         |                       |                   |                                                    | Fragment-ion (m/z) | 159.111 | 175.120 | 187.101 | 343.186 | 372.222               | 391.205 | 443.195 <sup>+2</sup> | 477.214 | 486.209 | 505.255  | 513.094 <sup>+2</sup> | 542.186 | 602.641 | 618.322 | 675.357 | 715.308 | 715.708 | 720.251 | 721.078 <sup>+2</sup> | 742.308 | 746.394 | 859.495 | 987.544 | 1088.593 | 1274.623 | Frac. Inten. (% of TIC) | 6.37 | 3.24 | 4.38 | 1.98 | 1.83 | 1.79 | 1.77 | 1.80 | 3.35 | 3.86 | 2.44 | 1.97 | 2.87 | 4.54 | 12.59 | 2.79 | 1.76 | 2.01 | 2.11 | 2.39 | 14.05 | 6.38 | 4.87 | 6.60 | 2.27 | Rel. Inten. (% of BP) | 45.38 | 23.05 | 31.18 | 13.95 | 13.05 | 12.76 | 12.57 | 12.85 | 23.83 | 27.48 | 17.41 | 14.02 | 20.45 | 32.34 | 89.82 | 19.84 | 12.52 | 14.31 | 15.06 | 16.99 | 100.00 | 45.45 | 34.70 | 47.02 | 16.16 | Score | -0.45 | 1.50 | -0.31 | 0.75 | -0.13 | 1.50 | -0.13 | -0.13 | -0.24 | 1.50 | -0.17 | -0.14 | -0.20 | 1.50 | 1.50 | -0.20 | -0.13 | -0.14 | -0.15 | -0.17 | 1.50 | 1.50 | 1.50 | 1.50 | 1.50 | Ion-type |  | Y1 |  | TQ1 |  | Y3 |  | Y4 |  | Y5 |  | Y6 |  | Y5 | Y6 |  |  |  |  |  | Y7 | Y8 | Y9 | Y10 | Y12 | Delta ppm |  | 4.3 |  | -38.2 |  | -19.7 |  | -0.8 |  |  |  |  |  | -28.0 | -5.7 |  |  |  |  |  | -4.5 | 15.2 | 4.0 | 4.1 | -23.2 |
| Fragment-ion (m/z)                                                                                                                                                                                                                                                                                                                                                                                                                                                                                                                                                                                                                                                                                                                                                                                                                                                                                                                                                                                                                                                                                                                                                                                                                                                                                                                                                                                                                                                                                                                                                                                                                                                                                                                                                                                                                                                                                                                                                                                                                                                                                                                                                                                                                                                                                                                                                                                                                                                                                  | 159.111 | 175.120 | 187.101 | 343.186          | 372.222                             | 391.205                         | 443.195 <sup>+2</sup>      | 477.214                     | 486.209            | 505.255 | 513.094 <sup>+2</sup> | 542.186           | 602.641                                            | 618.322            | 675.357 | 715.308 | 715.708 | 720.251 | 721.078 <sup>+2</sup> | 742.308 | 746.394               | 859.495 | 987.544 | 1088.593 | 1274.623              |         |         |         |         |         |         |         |                       |         |         |         |         |          |          |                         |      |      |      |      |      |      |      |      |      |      |      |      |      |      |       |      |      |      |      |      |       |      |      |      |      |                       |       |       |       |       |       |       |       |       |       |       |       |       |       |       |       |       |       |       |       |       |        |       |       |       |       |       |       |      |       |      |       |      |       |       |       |      |       |       |       |      |      |       |       |       |       |       |      |      |      |      |      |          |  |    |  |     |  |    |  |    |  |    |  |    |  |    |    |  |  |  |  |  |    |    |    |     |     |           |  |     |  |       |  |       |  |      |  |  |  |  |  |       |      |  |  |  |  |  |      |      |     |     |       |
| Frac. Inten. (% of TIC)                                                                                                                                                                                                                                                                                                                                                                                                                                                                                                                                                                                                                                                                                                                                                                                                                                                                                                                                                                                                                                                                                                                                                                                                                                                                                                                                                                                                                                                                                                                                                                                                                                                                                                                                                                                                                                                                                                                                                                                                                                                                                                                                                                                                                                                                                                                                                                                                                                                                             | 6.37    | 3.24    | 4.38    | 1.98             | 1.83                                | 1.79                            | 1.77                       | 1.80                        | 3.35               | 3.86    | 2.44                  | 1.97              | 2.87                                               | 4.54               | 12.59   | 2.79    | 1.76    | 2.01    | 2.11                  | 2.39    | 14.05                 | 6.38    | 4.87    | 6.60     | 2.27                  |         |         |         |         |         |         |         |                       |         |         |         |         |          |          |                         |      |      |      |      |      |      |      |      |      |      |      |      |      |      |       |      |      |      |      |      |       |      |      |      |      |                       |       |       |       |       |       |       |       |       |       |       |       |       |       |       |       |       |       |       |       |       |        |       |       |       |       |       |       |      |       |      |       |      |       |       |       |      |       |       |       |      |      |       |       |       |       |       |      |      |      |      |      |          |  |    |  |     |  |    |  |    |  |    |  |    |  |    |    |  |  |  |  |  |    |    |    |     |     |           |  |     |  |       |  |       |  |      |  |  |  |  |  |       |      |  |  |  |  |  |      |      |     |     |       |
| Rel. Inten. (% of BP)                                                                                                                                                                                                                                                                                                                                                                                                                                                                                                                                                                                                                                                                                                                                                                                                                                                                                                                                                                                                                                                                                                                                                                                                                                                                                                                                                                                                                                                                                                                                                                                                                                                                                                                                                                                                                                                                                                                                                                                                                                                                                                                                                                                                                                                                                                                                                                                                                                                                               | 45.38   | 23.05   | 31.18   | 13.95            | 13.05                               | 12.76                           | 12.57                      | 12.85                       | 23.83              | 27.48   | 17.41                 | 14.02             | 20.45                                              | 32.34              | 89.82   | 19.84   | 12.52   | 14.31   | 15.06                 | 16.99   | 100.00                | 45.45   | 34.70   | 47.02    | 16.16                 |         |         |         |         |         |         |         |                       |         |         |         |         |          |          |                         |      |      |      |      |      |      |      |      |      |      |      |      |      |      |       |      |      |      |      |      |       |      |      |      |      |                       |       |       |       |       |       |       |       |       |       |       |       |       |       |       |       |       |       |       |       |       |        |       |       |       |       |       |       |      |       |      |       |      |       |       |       |      |       |       |       |      |      |       |       |       |       |       |      |      |      |      |      |          |  |    |  |     |  |    |  |    |  |    |  |    |  |    |    |  |  |  |  |  |    |    |    |     |     |           |  |     |  |       |  |       |  |      |  |  |  |  |  |       |      |  |  |  |  |  |      |      |     |     |       |
| Score                                                                                                                                                                                                                                                                                                                                                                                                                                                                                                                                                                                                                                                                                                                                                                                                                                                                                                                                                                                                                                                                                                                                                                                                                                                                                                                                                                                                                                                                                                                                                                                                                                                                                                                                                                                                                                                                                                                                                                                                                                                                                                                                                                                                                                                                                                                                                                                                                                                                                               | -0.45   | 1.50    | -0.31   | 0.75             | -0.13                               | 1.50                            | -0.13                      | -0.13                       | -0.24              | 1.50    | -0.17                 | -0.14             | -0.20                                              | 1.50               | 1.50    | -0.20   | -0.13   | -0.14   | -0.15                 | -0.17   | 1.50                  | 1.50    | 1.50    | 1.50     | 1.50                  |         |         |         |         |         |         |         |                       |         |         |         |         |          |          |                         |      |      |      |      |      |      |      |      |      |      |      |      |      |      |       |      |      |      |      |      |       |      |      |      |      |                       |       |       |       |       |       |       |       |       |       |       |       |       |       |       |       |       |       |       |       |       |        |       |       |       |       |       |       |      |       |      |       |      |       |       |       |      |       |       |       |      |      |       |       |       |       |       |      |      |      |      |      |          |  |    |  |     |  |    |  |    |  |    |  |    |  |    |    |  |  |  |  |  |    |    |    |     |     |           |  |     |  |       |  |       |  |      |  |  |  |  |  |       |      |  |  |  |  |  |      |      |     |     |       |
| Ion-type                                                                                                                                                                                                                                                                                                                                                                                                                                                                                                                                                                                                                                                                                                                                                                                                                                                                                                                                                                                                                                                                                                                                                                                                                                                                                                                                                                                                                                                                                                                                                                                                                                                                                                                                                                                                                                                                                                                                                                                                                                                                                                                                                                                                                                                                                                                                                                                                                                                                                            |         | Y1      |         | TQ1              |                                     | Y3                              |                            | Y4                          |                    | Y5      |                       | Y6                |                                                    | Y5                 | Y6      |         |         |         |                       |         | Y7                    | Y8      | Y9      | Y10      | Y12                   |         |         |         |         |         |         |         |                       |         |         |         |         |          |          |                         |      |      |      |      |      |      |      |      |      |      |      |      |      |      |       |      |      |      |      |      |       |      |      |      |      |                       |       |       |       |       |       |       |       |       |       |       |       |       |       |       |       |       |       |       |       |       |        |       |       |       |       |       |       |      |       |      |       |      |       |       |       |      |       |       |       |      |      |       |       |       |       |       |      |      |      |      |      |          |  |    |  |     |  |    |  |    |  |    |  |    |  |    |    |  |  |  |  |  |    |    |    |     |     |           |  |     |  |       |  |       |  |      |  |  |  |  |  |       |      |  |  |  |  |  |      |      |     |     |       |
| Delta ppm                                                                                                                                                                                                                                                                                                                                                                                                                                                                                                                                                                                                                                                                                                                                                                                                                                                                                                                                                                                                                                                                                                                                                                                                                                                                                                                                                                                                                                                                                                                                                                                                                                                                                                                                                                                                                                                                                                                                                                                                                                                                                                                                                                                                                                                                                                                                                                                                                                                                                           |         | 4.3     |         | -38.2            |                                     | -19.7                           |                            | -0.8                        |                    |         |                       |                   |                                                    | -28.0              | -5.7    |         |         |         |                       |         | -4.5                  | 15.2    | 4.0     | 4.1      | -23.2                 |         |         |         |         |         |         |         |                       |         |         |         |         |          |          |                         |      |      |      |      |      |      |      |      |      |      |      |      |      |      |       |      |      |      |      |      |       |      |      |      |      |                       |       |       |       |       |       |       |       |       |       |       |       |       |       |       |       |       |       |       |       |       |        |       |       |       |       |       |       |      |       |      |       |      |       |       |       |      |       |       |       |      |      |       |       |       |       |       |      |      |      |      |      |          |  |    |  |     |  |    |  |    |  |    |  |    |  |    |    |  |  |  |  |  |    |    |    |     |     |           |  |     |  |       |  |       |  |      |  |  |  |  |  |       |      |  |  |  |  |  |      |      |     |     |       |

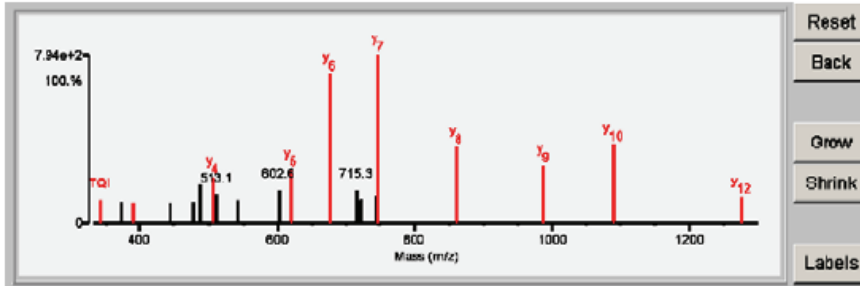

152

Detailed Results

| Rank                                                                                                                                                                                                                                                                                                                                                                                                                                                                                                                                                                                                                                                                                                                                                                                                                                                                                                                                                                                                                                                                                                                                                                                                                                                                                                                                                                                                                                                                                                                                                                                                                                                                                                                                                                                                                                                                                                                                                                                                                                                                                                                                                                                                                                                                                                                                                                                                                                                                                                                                                                                                                                                                                                                             | Score  | SPI (%) | BCS     | # Unmatched Ions | Sequence                                  | MH <sup>+</sup> Calculated (Da) | MH <sup>+</sup> Error (Da) | MH <sup>+</sup> Error (ppm) | Protein MW/pi (Da) | Species | Accession #      | MS-Digest Index #     | Protein Name                                          |                       |                       |                   |         |         |         |                       |                       |                       |                       |                       |         |                       |         |                       |                       |         |         |         |         |                       |                       |                       |                       |                       |         |                         |      |      |      |      |      |      |      |       |      |      |      |      |      |      |      |      |      |      |      |      |      |      |      |       |      |                       |      |      |      |       |       |       |       |       |       |       |       |       |       |       |       |       |       |       |       |       |       |       |       |        |       |       |      |      |      |       |       |      |      |      |       |      |      |      |      |      |      |      |      |       |      |      |      |      |      |      |      |          |   |    |   |  |    |    |    |  |    |    |                  |                  |    |                  |    |                   |  |  |    |                   |                   |                       |                   |                   |    |           |     |       |       |  |      |      |      |  |     |      |     |      |      |      |      |      |  |  |       |  |      |       |      |     |      |
|----------------------------------------------------------------------------------------------------------------------------------------------------------------------------------------------------------------------------------------------------------------------------------------------------------------------------------------------------------------------------------------------------------------------------------------------------------------------------------------------------------------------------------------------------------------------------------------------------------------------------------------------------------------------------------------------------------------------------------------------------------------------------------------------------------------------------------------------------------------------------------------------------------------------------------------------------------------------------------------------------------------------------------------------------------------------------------------------------------------------------------------------------------------------------------------------------------------------------------------------------------------------------------------------------------------------------------------------------------------------------------------------------------------------------------------------------------------------------------------------------------------------------------------------------------------------------------------------------------------------------------------------------------------------------------------------------------------------------------------------------------------------------------------------------------------------------------------------------------------------------------------------------------------------------------------------------------------------------------------------------------------------------------------------------------------------------------------------------------------------------------------------------------------------------------------------------------------------------------------------------------------------------------------------------------------------------------------------------------------------------------------------------------------------------------------------------------------------------------------------------------------------------------------------------------------------------------------------------------------------------------------------------------------------------------------------------------------------------------|--------|---------|---------|------------------|-------------------------------------------|---------------------------------|----------------------------|-----------------------------|--------------------|---------|------------------|-----------------------|-------------------------------------------------------|-----------------------|-----------------------|-------------------|---------|---------|---------|-----------------------|-----------------------|-----------------------|-----------------------|-----------------------|---------|-----------------------|---------|-----------------------|-----------------------|---------|---------|---------|---------|-----------------------|-----------------------|-----------------------|-----------------------|-----------------------|---------|-------------------------|------|------|------|------|------|------|------|-------|------|------|------|------|------|------|------|------|------|------|------|------|------|------|------|-------|------|-----------------------|------|------|------|-------|-------|-------|-------|-------|-------|-------|-------|-------|-------|-------|-------|-------|-------|-------|-------|-------|-------|-------|-------|--------|-------|-------|------|------|------|-------|-------|------|------|------|-------|------|------|------|------|------|------|------|------|-------|------|------|------|------|------|------|------|----------|---|----|---|--|----|----|----|--|----|----|------------------|------------------|----|------------------|----|-------------------|--|--|----|-------------------|-------------------|-----------------------|-------------------|-------------------|----|-----------|-----|-------|-------|--|------|------|------|--|-----|------|-----|------|------|------|------|------|--|--|-------|--|------|-------|------|-----|------|
| 1                                                                                                                                                                                                                                                                                                                                                                                                                                                                                                                                                                                                                                                                                                                                                                                                                                                                                                                                                                                                                                                                                                                                                                                                                                                                                                                                                                                                                                                                                                                                                                                                                                                                                                                                                                                                                                                                                                                                                                                                                                                                                                                                                                                                                                                                                                                                                                                                                                                                                                                                                                                                                                                                                                                                | 18.48  | 80.2    | 8       | 4/25             | (P) H L I I I N P D I I P I V E T L R (G) | 1870.8480                       | -0.0004                    | -0.2                        | 89294.6/4.87       | HUMAN   | P08238           | 252811                | Heat shock protein HSP 90-beta - Homo sapiens (Human) |                       |                       |                   |         |         |         |                       |                       |                       |                       |                       |         |                       |         |                       |                       |         |         |         |         |                       |                       |                       |                       |                       |         |                         |      |      |      |      |      |      |      |       |      |      |      |      |      |      |      |      |      |      |      |      |      |      |      |       |      |                       |      |      |      |       |       |       |       |       |       |       |       |       |       |       |       |       |       |       |       |       |       |       |       |        |       |       |      |      |      |       |       |      |      |      |       |      |      |      |      |      |      |      |      |       |      |      |      |      |      |      |      |          |   |    |   |  |    |    |    |  |    |    |                  |                  |    |                  |    |                   |  |  |    |                   |                   |                       |                   |                   |    |           |     |       |       |  |      |      |      |  |     |      |     |      |      |      |      |      |  |  |       |  |      |       |      |     |      |
| <table border="1"> <thead> <tr> <th>Fragment-ion (m/z)</th> <th>72.081</th> <th>88.085</th> <th>110.070</th> <th>120.081</th> <th>183.148</th> <th>188.070</th> <th>213.082</th> <th>228.085</th> <th>227.088</th> <th>243.137</th> <th>338.149</th> <th>414.265<sup>+2</sup></th> <th>488.188</th> <th>482.778<sup>+2</sup></th> <th>522.728<sup>+2</sup></th> <th>681.278</th> <th>688.821</th> <th>689.820</th> <th>817.381</th> <th>846.843<sup>+2</sup></th> <th>702.385<sup>+2</sup></th> <th>767.887<sup>+2</sup></th> <th>788.907<sup>+2</sup></th> <th>823.466<sup>+2</sup></th> <th>827.488</th> </tr> </thead> <tbody> <tr> <td>Frac. Inten. (% of TIC)</td> <td>0.07</td> <td>0.17</td> <td>0.18</td> <td>2.58</td> <td>1.57</td> <td>8.36</td> <td>2.17</td> <td>11.01</td> <td>3.23</td> <td>2.04</td> <td>3.55</td> <td>2.58</td> <td>5.98</td> <td>2.33</td> <td>3.88</td> <td>2.35</td> <td>3.53</td> <td>1.99</td> <td>2.83</td> <td>3.90</td> <td>3.52</td> <td>3.44</td> <td>6.43</td> <td>13.34</td> <td>8.05</td> </tr> <tr> <td>Rel. Inten. (% of BP)</td> <td>0.51</td> <td>1.28</td> <td>1.35</td> <td>19.37</td> <td>14.77</td> <td>62.66</td> <td>16.23</td> <td>82.48</td> <td>24.19</td> <td>15.31</td> <td>26.50</td> <td>19.32</td> <td>44.80</td> <td>17.46</td> <td>29.10</td> <td>17.65</td> <td>27.21</td> <td>14.88</td> <td>21.24</td> <td>29.23</td> <td>29.35</td> <td>25.75</td> <td>48.21</td> <td>100.00</td> <td>60.43</td> </tr> <tr> <td>Score</td> <td>0.50</td> <td>0.22</td> <td>1.00</td> <td>-0.19</td> <td>-0.15</td> <td>0.50</td> <td>0.75</td> <td>0.50</td> <td>-0.24</td> <td>0.75</td> <td>0.50</td> <td>1.50</td> <td>0.50</td> <td>1.50</td> <td>0.50</td> <td>0.50</td> <td>1.50</td> <td>-0.15</td> <td>1.50</td> <td>1.50</td> <td>1.50</td> <td>0.50</td> <td>1.50</td> <td>1.50</td> <td>1.50</td> </tr> <tr> <td>Ion-type</td> <td>V</td> <td>LI</td> <td>H</td> <td></td> <td>a1</td> <td>PD</td> <td>b1</td> <td></td> <td>EI</td> <td>b2</td> <td>y7<sup>+2</sup></td> <td>y8<sup>+2</sup></td> <td>b3</td> <td>y8<sup>+2</sup></td> <td>b4</td> <td>y9<sup>+10</sup></td> <td></td> <td></td> <td>y5</td> <td>y11<sup>+2</sup></td> <td>y12<sup>+2</sup></td> <td>y13-H2O<sup>+2</sup></td> <td>y13<sup>+2</sup></td> <td>y14<sup>+2</sup></td> <td>y7</td> </tr> <tr> <td>Delta ppm</td> <td>3.1</td> <td>-13.1</td> <td>-10.7</td> <td></td> <td>-5.3</td> <td>20.3</td> <td>-3.4</td> <td></td> <td>9.3</td> <td>-1.9</td> <td>4.3</td> <td>-8.4</td> <td>-9.9</td> <td>-8.2</td> <td>-1.0</td> <td>-1.5</td> <td></td> <td></td> <td>-15.8</td> <td></td> <td>-0.6</td> <td>-19.7</td> <td>-0.5</td> <td>7.5</td> <td>-3.1</td> </tr> </tbody> </table> |        |         |         |                  |                                           |                                 |                            |                             |                    |         |                  |                       |                                                       | Fragment-ion (m/z)    | 72.081                | 88.085            | 110.070 | 120.081 | 183.148 | 188.070               | 213.082               | 228.085               | 227.088               | 243.137               | 338.149 | 414.265 <sup>+2</sup> | 488.188 | 482.778 <sup>+2</sup> | 522.728 <sup>+2</sup> | 681.278 | 688.821 | 689.820 | 817.381 | 846.843 <sup>+2</sup> | 702.385 <sup>+2</sup> | 767.887 <sup>+2</sup> | 788.907 <sup>+2</sup> | 823.466 <sup>+2</sup> | 827.488 | Frac. Inten. (% of TIC) | 0.07 | 0.17 | 0.18 | 2.58 | 1.57 | 8.36 | 2.17 | 11.01 | 3.23 | 2.04 | 3.55 | 2.58 | 5.98 | 2.33 | 3.88 | 2.35 | 3.53 | 1.99 | 2.83 | 3.90 | 3.52 | 3.44 | 6.43 | 13.34 | 8.05 | Rel. Inten. (% of BP) | 0.51 | 1.28 | 1.35 | 19.37 | 14.77 | 62.66 | 16.23 | 82.48 | 24.19 | 15.31 | 26.50 | 19.32 | 44.80 | 17.46 | 29.10 | 17.65 | 27.21 | 14.88 | 21.24 | 29.23 | 29.35 | 25.75 | 48.21 | 100.00 | 60.43 | Score | 0.50 | 0.22 | 1.00 | -0.19 | -0.15 | 0.50 | 0.75 | 0.50 | -0.24 | 0.75 | 0.50 | 1.50 | 0.50 | 1.50 | 0.50 | 0.50 | 1.50 | -0.15 | 1.50 | 1.50 | 1.50 | 0.50 | 1.50 | 1.50 | 1.50 | Ion-type | V | LI | H |  | a1 | PD | b1 |  | EI | b2 | y7 <sup>+2</sup> | y8 <sup>+2</sup> | b3 | y8 <sup>+2</sup> | b4 | y9 <sup>+10</sup> |  |  | y5 | y11 <sup>+2</sup> | y12 <sup>+2</sup> | y13-H2O <sup>+2</sup> | y13 <sup>+2</sup> | y14 <sup>+2</sup> | y7 | Delta ppm | 3.1 | -13.1 | -10.7 |  | -5.3 | 20.3 | -3.4 |  | 9.3 | -1.9 | 4.3 | -8.4 | -9.9 | -8.2 | -1.0 | -1.5 |  |  | -15.8 |  | -0.6 | -19.7 | -0.5 | 7.5 | -3.1 |
| Fragment-ion (m/z)                                                                                                                                                                                                                                                                                                                                                                                                                                                                                                                                                                                                                                                                                                                                                                                                                                                                                                                                                                                                                                                                                                                                                                                                                                                                                                                                                                                                                                                                                                                                                                                                                                                                                                                                                                                                                                                                                                                                                                                                                                                                                                                                                                                                                                                                                                                                                                                                                                                                                                                                                                                                                                                                                                               | 72.081 | 88.085  | 110.070 | 120.081          | 183.148                                   | 188.070                         | 213.082                    | 228.085                     | 227.088            | 243.137 | 338.149          | 414.265 <sup>+2</sup> | 488.188                                               | 482.778 <sup>+2</sup> | 522.728 <sup>+2</sup> | 681.278           | 688.821 | 689.820 | 817.381 | 846.843 <sup>+2</sup> | 702.385 <sup>+2</sup> | 767.887 <sup>+2</sup> | 788.907 <sup>+2</sup> | 823.466 <sup>+2</sup> | 827.488 |                       |         |                       |                       |         |         |         |         |                       |                       |                       |                       |                       |         |                         |      |      |      |      |      |      |      |       |      |      |      |      |      |      |      |      |      |      |      |      |      |      |      |       |      |                       |      |      |      |       |       |       |       |       |       |       |       |       |       |       |       |       |       |       |       |       |       |       |       |        |       |       |      |      |      |       |       |      |      |      |       |      |      |      |      |      |      |      |      |       |      |      |      |      |      |      |      |          |   |    |   |  |    |    |    |  |    |    |                  |                  |    |                  |    |                   |  |  |    |                   |                   |                       |                   |                   |    |           |     |       |       |  |      |      |      |  |     |      |     |      |      |      |      |      |  |  |       |  |      |       |      |     |      |
| Frac. Inten. (% of TIC)                                                                                                                                                                                                                                                                                                                                                                                                                                                                                                                                                                                                                                                                                                                                                                                                                                                                                                                                                                                                                                                                                                                                                                                                                                                                                                                                                                                                                                                                                                                                                                                                                                                                                                                                                                                                                                                                                                                                                                                                                                                                                                                                                                                                                                                                                                                                                                                                                                                                                                                                                                                                                                                                                                          | 0.07   | 0.17    | 0.18    | 2.58             | 1.57                                      | 8.36                            | 2.17                       | 11.01                       | 3.23               | 2.04    | 3.55             | 2.58                  | 5.98                                                  | 2.33                  | 3.88                  | 2.35              | 3.53    | 1.99    | 2.83    | 3.90                  | 3.52                  | 3.44                  | 6.43                  | 13.34                 | 8.05    |                       |         |                       |                       |         |         |         |         |                       |                       |                       |                       |                       |         |                         |      |      |      |      |      |      |      |       |      |      |      |      |      |      |      |      |      |      |      |      |      |      |      |       |      |                       |      |      |      |       |       |       |       |       |       |       |       |       |       |       |       |       |       |       |       |       |       |       |       |        |       |       |      |      |      |       |       |      |      |      |       |      |      |      |      |      |      |      |      |       |      |      |      |      |      |      |      |          |   |    |   |  |    |    |    |  |    |    |                  |                  |    |                  |    |                   |  |  |    |                   |                   |                       |                   |                   |    |           |     |       |       |  |      |      |      |  |     |      |     |      |      |      |      |      |  |  |       |  |      |       |      |     |      |
| Rel. Inten. (% of BP)                                                                                                                                                                                                                                                                                                                                                                                                                                                                                                                                                                                                                                                                                                                                                                                                                                                                                                                                                                                                                                                                                                                                                                                                                                                                                                                                                                                                                                                                                                                                                                                                                                                                                                                                                                                                                                                                                                                                                                                                                                                                                                                                                                                                                                                                                                                                                                                                                                                                                                                                                                                                                                                                                                            | 0.51   | 1.28    | 1.35    | 19.37            | 14.77                                     | 62.66                           | 16.23                      | 82.48                       | 24.19              | 15.31   | 26.50            | 19.32                 | 44.80                                                 | 17.46                 | 29.10                 | 17.65             | 27.21   | 14.88   | 21.24   | 29.23                 | 29.35                 | 25.75                 | 48.21                 | 100.00                | 60.43   |                       |         |                       |                       |         |         |         |         |                       |                       |                       |                       |                       |         |                         |      |      |      |      |      |      |      |       |      |      |      |      |      |      |      |      |      |      |      |      |      |      |      |       |      |                       |      |      |      |       |       |       |       |       |       |       |       |       |       |       |       |       |       |       |       |       |       |       |       |        |       |       |      |      |      |       |       |      |      |      |       |      |      |      |      |      |      |      |      |       |      |      |      |      |      |      |      |          |   |    |   |  |    |    |    |  |    |    |                  |                  |    |                  |    |                   |  |  |    |                   |                   |                       |                   |                   |    |           |     |       |       |  |      |      |      |  |     |      |     |      |      |      |      |      |  |  |       |  |      |       |      |     |      |
| Score                                                                                                                                                                                                                                                                                                                                                                                                                                                                                                                                                                                                                                                                                                                                                                                                                                                                                                                                                                                                                                                                                                                                                                                                                                                                                                                                                                                                                                                                                                                                                                                                                                                                                                                                                                                                                                                                                                                                                                                                                                                                                                                                                                                                                                                                                                                                                                                                                                                                                                                                                                                                                                                                                                                            | 0.50   | 0.22    | 1.00    | -0.19            | -0.15                                     | 0.50                            | 0.75                       | 0.50                        | -0.24              | 0.75    | 0.50             | 1.50                  | 0.50                                                  | 1.50                  | 0.50                  | 0.50              | 1.50    | -0.15   | 1.50    | 1.50                  | 1.50                  | 0.50                  | 1.50                  | 1.50                  | 1.50    |                       |         |                       |                       |         |         |         |         |                       |                       |                       |                       |                       |         |                         |      |      |      |      |      |      |      |       |      |      |      |      |      |      |      |      |      |      |      |      |      |      |      |       |      |                       |      |      |      |       |       |       |       |       |       |       |       |       |       |       |       |       |       |       |       |       |       |       |       |        |       |       |      |      |      |       |       |      |      |      |       |      |      |      |      |      |      |      |      |       |      |      |      |      |      |      |      |          |   |    |   |  |    |    |    |  |    |    |                  |                  |    |                  |    |                   |  |  |    |                   |                   |                       |                   |                   |    |           |     |       |       |  |      |      |      |  |     |      |     |      |      |      |      |      |  |  |       |  |      |       |      |     |      |
| Ion-type                                                                                                                                                                                                                                                                                                                                                                                                                                                                                                                                                                                                                                                                                                                                                                                                                                                                                                                                                                                                                                                                                                                                                                                                                                                                                                                                                                                                                                                                                                                                                                                                                                                                                                                                                                                                                                                                                                                                                                                                                                                                                                                                                                                                                                                                                                                                                                                                                                                                                                                                                                                                                                                                                                                         | V      | LI      | H       |                  | a1                                        | PD                              | b1                         |                             | EI                 | b2      | y7 <sup>+2</sup> | y8 <sup>+2</sup>      | b3                                                    | y8 <sup>+2</sup>      | b4                    | y9 <sup>+10</sup> |         |         | y5      | y11 <sup>+2</sup>     | y12 <sup>+2</sup>     | y13-H2O <sup>+2</sup> | y13 <sup>+2</sup>     | y14 <sup>+2</sup>     | y7      |                       |         |                       |                       |         |         |         |         |                       |                       |                       |                       |                       |         |                         |      |      |      |      |      |      |      |       |      |      |      |      |      |      |      |      |      |      |      |      |      |      |      |       |      |                       |      |      |      |       |       |       |       |       |       |       |       |       |       |       |       |       |       |       |       |       |       |       |       |        |       |       |      |      |      |       |       |      |      |      |       |      |      |      |      |      |      |      |      |       |      |      |      |      |      |      |      |          |   |    |   |  |    |    |    |  |    |    |                  |                  |    |                  |    |                   |  |  |    |                   |                   |                       |                   |                   |    |           |     |       |       |  |      |      |      |  |     |      |     |      |      |      |      |      |  |  |       |  |      |       |      |     |      |
| Delta ppm                                                                                                                                                                                                                                                                                                                                                                                                                                                                                                                                                                                                                                                                                                                                                                                                                                                                                                                                                                                                                                                                                                                                                                                                                                                                                                                                                                                                                                                                                                                                                                                                                                                                                                                                                                                                                                                                                                                                                                                                                                                                                                                                                                                                                                                                                                                                                                                                                                                                                                                                                                                                                                                                                                                        | 3.1    | -13.1   | -10.7   |                  | -5.3                                      | 20.3                            | -3.4                       |                             | 9.3                | -1.9    | 4.3              | -8.4                  | -9.9                                                  | -8.2                  | -1.0                  | -1.5              |         |         | -15.8   |                       | -0.6                  | -19.7                 | -0.5                  | 7.5                   | -3.1    |                       |         |                       |                       |         |         |         |         |                       |                       |                       |                       |                       |         |                         |      |      |      |      |      |      |      |       |      |      |      |      |      |      |      |      |      |      |      |      |      |      |      |       |      |                       |      |      |      |       |       |       |       |       |       |       |       |       |       |       |       |       |       |       |       |       |       |       |       |        |       |       |      |      |      |       |       |      |      |      |       |      |      |      |      |      |      |      |      |       |      |      |      |      |      |      |      |          |   |    |   |  |    |    |    |  |    |    |                  |                  |    |                  |    |                   |  |  |    |                   |                   |                       |                   |                   |    |           |     |       |       |  |      |      |      |  |     |      |     |      |      |      |      |      |  |  |       |  |      |       |      |     |      |

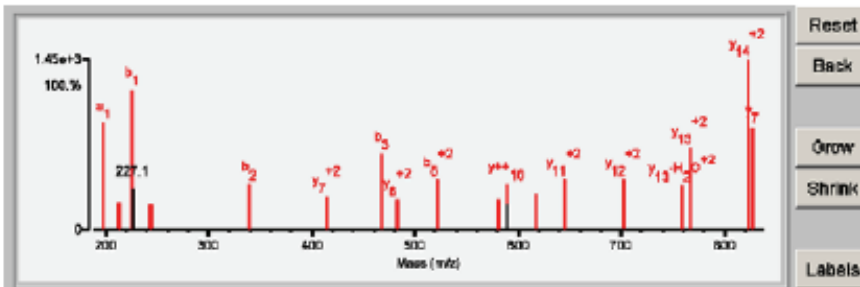



153

Detailed Results

| Rank | Score | SP1 (%) | BCS | # Unmatched Ions | Sequence                            | MH <sup>+</sup> Calculated (Da) | MH <sup>+</sup> Error (Da) | MH <sup>+</sup> Error (ppm) | Protein MW(pI) (Da) | Species | Accession #      | MS-Digest Index #                                     | Protein Name |
|------|-------|---------|-----|------------------|-------------------------------------|---------------------------------|----------------------------|-----------------------------|---------------------|---------|------------------|-------------------------------------------------------|--------------|
| 1    | 18.44 | 78.7    | 10  | 8/24             | (R)YHITSQSGDVEVITISL/S/R/Y/Y/S/R(M) | 2284.9434                       | 0.0190                     | 6.7                         | 88284.914.97        | HUMAN   | P08238<br>262911 | Heat shock protein HSP 90-beta - Homo sapiens (Human) |              |

  

| Fragment-Ion (m/z)      | 74.080 | 88.087 | 102.064 | 104.062 | 138.078 | 282.160 | 301.130 | 361.228 | 624.288 | 647.187 <sup>+2</sup>        | 812.724 <sup>+2</sup>         | 846.297 <sup>+2</sup>         | 863.323 | 863.242 <sup>+2</sup>         | 888.760 <sup>+2</sup>         | 897.755 <sup>+2</sup> | 740.357 | 748.861 | 863.437 | 840.471 | 864.353        | 1041.620 | 1088.382       | 1224.491        |
|-------------------------|--------|--------|---------|---------|---------|---------|---------|---------|---------|------------------------------|-------------------------------|-------------------------------|---------|-------------------------------|-------------------------------|-----------------------|---------|---------|---------|---------|----------------|----------|----------------|-----------------|
| Frac. Inten. (% of TIC) | 1.52   | 0.18   | 0.05    | 6.33    | 0.05    | 3.95    | 2.73    | 2.66    | 6.07    | 2.62                         | 1.52                          | 1.58                          | 5.77    | 2.65                          | 4.09                          | 4.43                  | 19.65   | 4.10    | 5.96    | 8.08    | 1.50           | 5.52     | 5.90           | 3.20            |
| Rel. Inten. (% of BP)   | 7.75   | 0.90   | 0.29    | 32.22   | 0.25    | 20.09   | 13.88   | 13.52   | 30.90   | 13.32                        | 7.73                          | 8.03                          | 29.37   | 13.54                         | 20.81                         | 22.53                 | 100.00  | 20.88   | 29.81   | 41.10   | 7.64           | 28.08    | 30.02          | 16.28           |
| Score                   | -0.08  | 0.22   | 1.00    | -0.32   | 1.00    | 1.50    | -0.14   | 1.50    | 1.50    | 0.50                         | 0.50                          | -0.06                         | 1.50    | 0.50                          | -0.21                         | 0.25                  | 1.50    | -0.21   | 1.50    | 1.50    | 0.50           | 1.50     | 0.50           | 0.50            |
| Ion-type                | LI     | E      | Y       | Y       | Y       | Y       | Y       | Y       | Y       | b <sub>9</sub> <sup>+2</sup> | b <sub>10</sub> <sup>+2</sup> | b <sub>11</sub> <sup>+2</sup> | Y       | b <sub>11</sub> <sup>+2</sup> | b <sub>12</sub> <sup>+2</sup> | Y                     | Y       | Y       | Y       | Y       | b <sub>8</sub> | Y        | b <sub>9</sub> | b <sub>10</sub> |
| Delta ppm               |        | 5.5    | -13.3   |         | 2.3     | -3.0    |         | 9.2     | 1.1     | -3.2                         | 8.4                           |                               | -3.4    | -0.5                          |                               | 1.4                   | -1.0    |         | -4.7    | -2.4    | 5.3            | -1.0     | -7.4           | 0.5             |

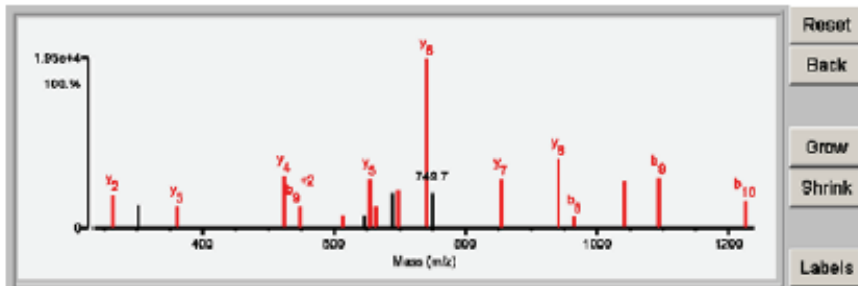

154

Detailed Results

| Rank | Score | SP1 (%) | BCS | # Unmatched Ions | Sequence                   | MH <sup>+</sup> Calculated (Da) | MH <sup>+</sup> Error (Da) | MH <sup>+</sup> Error (ppm) | Protein MW(pI) (Da) | Species | Accession #      | MS-Digest Index #                                     | Protein Name |
|------|-------|---------|-----|------------------|----------------------------|---------------------------------|----------------------------|-----------------------------|---------------------|---------|------------------|-------------------------------------------------------|--------------|
| 1    | 13.88 | 88.1    | 7   | 10/26            | (H)IIEIIR/PD/RIPIVETL/R(Q) | 1738.8891                       | -0.0088                    | -4.9                        | 88284.914.97        | HUMAN   | P08238<br>262911 | Heat shock protein HSP 90-beta - Homo sapiens (Human) |              |

  

| Fragment-Ion (m/z)      | 88.088 | 176.113 | 202.087 | 327.184 | 330.144 | 331.131 | 428.210 | 440.264 | 444.218 | 482.780 <sup>+2</sup>        | 642.296                       | 688.818 <sup>+2</sup>         | 846.840 <sup>+2</sup>         | 702.378 <sup>+2</sup>         | 768.885 <sup>+2</sup>         | 827.481 | 870.405 | 907.378 | 823.400 | 864.644 | 1022.488 | 1138.640 | 1178.838 | 1189.602 | 1280.870 |
|-------------------------|--------|---------|---------|---------|---------|---------|---------|---------|---------|------------------------------|-------------------------------|-------------------------------|-------------------------------|-------------------------------|-------------------------------|---------|---------|---------|---------|---------|----------|----------|----------|----------|----------|
| Frac. Inten. (% of TIC) | 0.11   | 2.56    | 2.71    | 2.63    | 3.63    | 9.48    | 3.99    | 2.44    | 4.61    | 3.05                         | 2.97                          | 5.12                          | 6.06                          | 6.10                          | 2.93                          | 5.22    | 3.95    | 3.24    | 2.50    | 2.35    | 2.73     | 4.00     | 6.19     | 2.16     | 3.31     |
| Rel. Inten. (% of BP)   | 1.15   | 26.99   | 28.59   | 27.74   | 37.26   | 100.00  | 42.09   | 25.69   | 48.59   | 32.12                        | 31.33                         | 96.20                         | 63.88                         | 64.29                         | 30.91                         | 55.03   | 41.63   | 34.21   | 26.33   | 25.25   | 28.79    | 42.20    | 86.40    | 22.78    | 34.92    |
| Score                   | 0.22   | 1.50    | 0.50    | -0.28   | -0.37   | 0.50    | -0.42   | -0.26   | 0.50    | 1.50                         | -0.31                         | 1.50                          | 1.50                          | 1.50                          | 1.50                          | 1.50    | -0.42   | 0.50    | -0.26   | 1.50    | -0.29    | -0.42    | 1.50     | -0.23    | 1.50     |
| Ion-type                | LI     | Y1      | b1      | b2      | b2      | b2      | b2      | b2      | b2      | y <sub>8</sub> <sup>+2</sup> | y <sub>10</sub> <sup>+2</sup> | y <sub>10</sub> <sup>+2</sup> | y <sub>11</sub> <sup>+2</sup> | y <sub>12</sub> <sup>+2</sup> | y <sub>13</sub> <sup>+2</sup> | Y       | Y       | b7      | Y       | Y       | Y        | Y        | Y        | Y        | Y        |
| Delta ppm               | -9.6   | -31.1   | -20.9   |         |         | -7.9    |         | 3.0     |         | -4.9                         |                               | -7.5                          | -6.0                          | -13.3                         | -25.2                         | -6.6    |         | -23.3   |         | -14.4   |          |          |          |          | -7.5     |

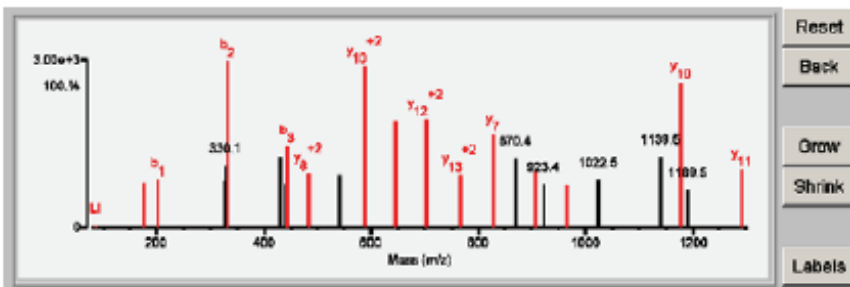

155

Detailed Results

| Rank | Score | SP1 (%) | BCS | # Unmatched Ions | Sequence                                                                | MH <sup>+</sup> Calculated (Da) | MH <sup>+</sup> Error (Da) | MH <sup>+</sup> Error (ppm) | Protein MW PI (Da) | Species | Accession # | MS-Digest Index # | Protein Name                                               |
|------|-------|---------|-----|------------------|-------------------------------------------------------------------------|---------------------------------|----------------------------|-----------------------------|--------------------|---------|-------------|-------------------|------------------------------------------------------------|
| 1    | 10.66 | 56.1    | 9   | 10/25            | (T) I V E D G I I P R / V K / R / Y / A / G D E T H L G G R D F D R (M) | 2945.2716                       | 0.0209                     | 7.1                         | 70021.35.56        | HUMAN   | P54652      | 256011            | Heat shock-related 70 kDa protein 2 - Homo sapiens (Human) |
| 1    | 10.66 | 56.1    | 9   | 10/25            | (T) I V E D G I I P R / V K / R / Y / A / G D E T H L G G R D F D R (M) | 2945.2716                       | 0.0209                     | 7.1                         | 70898.45.58        | HUMAN   | P11142      | 256121            | Heat shock cognate 71 kDa protein - Homo sapiens (Human)   |

  

| Fragment-Ion (m/z)      | 70.068 | 88.095 | 102.065 | 174.094 | 202.088 | 279.134 | 302.104 | 503.181 | 616.259           | 716.806 <sup>+2</sup> | 752.319 <sup>+2</sup> | 763.384           | 802.849 <sup>+2</sup> | 846.361 <sup>+2</sup> | 884.380 <sup>+3</sup> | 910.376 <sup>+2</sup> | 931.403 <sup>+2</sup> | 937.067 <sup>+3</sup> | 1027.490 <sup>+2</sup> | 1045.444 <sup>+2</sup> | 1097.994 <sup>+2</sup> | 1118.969 <sup>+2</sup> | 1165.517 <sup>+2</sup> | 1204.022 <sup>+2</sup> | 1261.578 <sup>+2</sup> |
|-------------------------|--------|--------|---------|---------|---------|---------|---------|---------|-------------------|-----------------------|-----------------------|-------------------|-----------------------|-----------------------|-----------------------|-----------------------|-----------------------|-----------------------|------------------------|------------------------|------------------------|------------------------|------------------------|------------------------|------------------------|
| Frac. Inten. (% of TIC) | 0.00   | 0.12   | 0.06    | 3.40    | 3.19    | 3.07    | 2.98    | 11.91   | 5.74              | 2.76                  | 2.01                  | 1.02              | 2.71                  | 9.80                  | 2.89                  | 2.32                  | 3.94                  | 1.91                  | 2.44                   | 3.74                   | 7.03                   | 14.58                  | 7.96                   | 2.00                   | 2.43                   |
| Rel. Inten. (% of BP)   | 0.01   | 0.80   | 0.44    | 23.35   | 21.87   | 21.03   | 18.19   | 81.86   | 39.38             | 18.94                 | 13.81                 | 13.14             | 18.80                 | 67.16                 | 19.82                 | 15.91                 | 26.98                 | 13.06                 | 18.74                  | 25.61                  | 48.22                  | 100.00                 | 52.46                  | 13.74                  | 16.68                  |
| Score                   | 0.20   | 0.22   | 1.00    | 0.50    | 0.50    | -0.21   | 0.75    | 0.50    | 1.50              | 1.50                  | 1.50                  | 0.50              | 1.50                  | 1.50                  | -0.20                 | -0.18                 | -0.27                 | -0.13                 | 1.50                   | -0.28                  | -0.48                  | -1.00                  | 1.50                   | -0.14                  | -0.17                  |
| Ion-type                | PR     | LI     | E       | a1      | b1      | GED     | b4      | b6      | y13 <sup>+2</sup> | y14 <sup>+2</sup>     | b6                    | y15 <sup>+2</sup> | y16 <sup>+2</sup>     | y18 <sup>+2</sup>     |                       |                       |                       |                       | y18 <sup>+2</sup>      |                        |                        |                        | y20 <sup>+2</sup>      |                        |                        |
| Delta ppm               | 5.3    | -11.9  | 2.4     | -10.4   | -15.5   |         | 14.3    | -1.2    | -10.5             | -0.2                  | -9.9                  | 38.4              | -1.4                  | -8.4                  |                       |                       |                       |                       | 33.7                   |                        |                        |                        | 5.8                    |                        |                        |

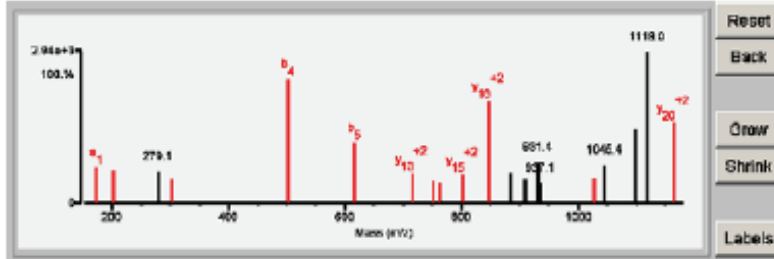

156

Detailed Results

| Rank | Score | SP1 (%) | BCS | # Unmatched Ions | Sequence                                          | MH <sup>+</sup> Calculated (Da) | MH <sup>+</sup> Error (Da) | MH <sup>+</sup> Error (ppm) | Protein MW PI (Da) | Species | Accession # | MS-Digest Index # | Protein Name                                    |
|------|-------|---------|-----|------------------|---------------------------------------------------|---------------------------------|----------------------------|-----------------------------|--------------------|---------|-------------|-------------------|-------------------------------------------------|
| 1    | 18.18 | 79.7    | 9   | 6/26             | (V) G A H A G V E Y (G) A / E / A / L / E / R (M) | 1618.8642                       | 0.0188                     | 12.2                        | 16267.618.72       | HUMAN   | P89905      | 233415            | Hemoglobin subunit alpha - Homo sapiens (Human) |

  

| Fragment-Ion (m/z)      | 70.088 | 72.081 | 88.097 | 94.088 | 101.073 | 102.054 | 110.070 | 120.080 | 129.086 | 131.084 | 138.075 | 176.120 | 304.181 | 340.105 | 411.147 | 417.261 | 482.181 | 488.285 | 599.304 | 611.221 | 617.328 | 688.351 | 745.381 | 774.284 | 831.300 |
|-------------------------|--------|--------|--------|--------|---------|---------|---------|---------|---------|---------|---------|---------|---------|---------|---------|---------|---------|---------|---------|---------|---------|---------|---------|---------|---------|
| Frac. Inten. (% of TIC) | 0.00   | 3.84   | 0.25   | 2.52   | 2.44    | 0.22    | 0.07    | 2.82    | 4.30    | 2.24    | 0.45    | 4.33    | 4.50    | 4.33    | 4.55    | 5.92    | 5.31    | 10.95   | 2.09    | 13.62   | 7.88    | 3.36    | 2.99    | 3.00    | 8.01    |
| Rel. Inten. (% of BP)   | 0.02   | 28.19  | 1.83   | 18.53  | 17.88   | 1.61    | 0.45    | 20.71   | 31.59   | 16.45   | 3.27    | 31.82   | 33.04   | 31.82   | 33.44   | 43.49   | 38.97   | 80.36   | 15.37   | 100.00  | 57.87   | 24.69   | 21.98   | 22.01   | 58.77   |
| Score                   | 0.20   | -0.28  | 0.22   | -0.19  | 0.50    | 1.00    | 1.00    | -0.21   | 0.75    | -0.16   | 1.00    | 1.50    | 1.50    | -0.32   | -0.33   | 1.50    | 0.50    | 1.50    | 0.50    | 0.50    | 1.50    | 1.50    | 1.50    | 0.50    | 0.50    |
| Ion-type                | PR     |        | LI     |        | GA-28   | E       | H       |         | GKR     |         | Y       | Y1      | Y2      |         | Y3      | b5      | Y4      | Y5-H2O  | b6      | b6      | Y6      | Y7      | b7      | b8      | b8      |
| Delta ppm               | 9.6    |        | 0.9    |        | 4.6     | -11.3   | -10.7   |         | -8.9    | GA      | -7.3    | 5.4     | -3.4    |         | 12.4    | -3.0    | 4.5     | -17.8   | -7.6    | 4.2     | -16.5   | -3.7    | -6.4    | -12.4   |         |

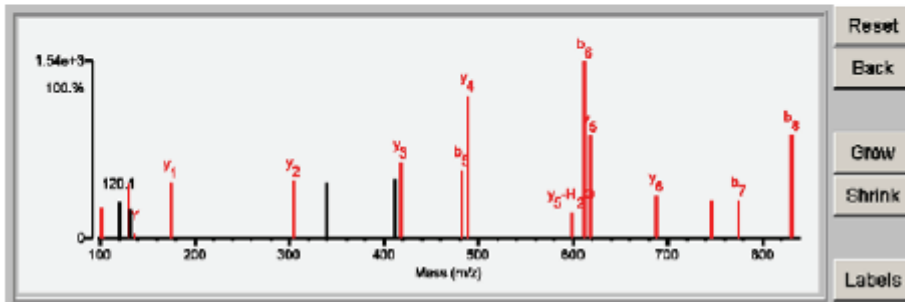

157

Detailed Results

| Rank                    | Score  | SP1 (%) | BCS     | # Unmatched Ions | Sequence                                      | MH <sup>+</sup> Calculated (Da) | MH <sup>+</sup> Error (Da) | MH <sup>+</sup> Error (ppm) | Protein MW(pI) (Da)   | Species | Accession #            | MS-Digest Index #      | Protein Name                                                      |                       |                       |                       |                       |                       |         |          |          |          |          |          |          |
|-------------------------|--------|---------|---------|------------------|-----------------------------------------------|---------------------------------|----------------------------|-----------------------------|-----------------------|---------|------------------------|------------------------|-------------------------------------------------------------------|-----------------------|-----------------------|-----------------------|-----------------------|-----------------------|---------|----------|----------|----------|----------|----------|----------|
| 1                       | 12.04  | 70.0    | 6       | 11/26            | (I) F V (G) G (L) S (P) D T / P E E K I R (E) | 1887.8717                       | 0.0000                     | 0.0                         | 38434.47.81           | HUMAN   | <a href="#">Q14103</a> | <a href="#">260126</a> | Heterogeneous nuclear ribonucleoprotein D0 - Homo sapiens (Human) |                       |                       |                       |                       |                       |         |          |          |          |          |          |          |
| Fragment-ion (m/z)      | 72.080 | 314.123 | 336.141 | 382.186          | 414.232                                       | 448.181                         | 682.289                    | 683.274 <sup>+2</sup>       | 810.286 <sup>+2</sup> | 848.288 | 863.806                | 787.388 <sup>+2</sup>  | 770.388 <sup>+2</sup>                                             | 818.412 <sup>+2</sup> | 863.408 <sup>+2</sup> | 888.844 <sup>+2</sup> | 878.888 <sup>+2</sup> | 888.461 <sup>+2</sup> | 908.483 | 1084.654 | 1128.510 | 1171.589 | 1213.638 | 1219.587 | 1308.589 |
| Frac. Inten. (% of TIC) | 0.06   | 3.31    | 2.91    | 3.70             | 1.42                                          | 20.63                           | 6.05                       | 3.70                        | 2.78                  | 6.92    | 2.01                   | 2.51                   | 1.58                                                              | 2.20                  | 1.87                  | 3.08                  | 1.20                  | 1.61                  | 2.59    | 4.48     | 5.03     | 2.96     | 2.38     | 9.86     | 5.43     |
| Rel. Inten. (% of BP)   | 0.32   | 16.13   | 13.89   | 19.00            | 6.93                                          | 100.00                          | 29.48                      | 18.02                       | 13.55                 | 33.72   | 9.77                   | 12.21                  | 7.72                                                              | 10.71                 | 9.12                  | 15.02                 | 5.84                  | 7.86                  | 12.62   | 21.84    | 24.62    | 13.92    | 11.69    | 48.05    | 25.43    |
| Score                   | 0.50   | 0.75    | 0.50    | 0.50             | 0.75                                          | 0.50                            | 0.50                       | -0.18                       | 1.50                  | 0.50    | 1.50                   | 1.50                   | -0.08                                                             | -0.11                 | -0.09                 | -0.15                 | -0.06                 | -0.08                 | 1.50    | -0.22    | -0.25    | -0.14    | -0.12    | 1.50     | 1.50     |
| Ion-type                | V      | DTP     | b2      | b3               | VGGLS                                         | b4                              | b5                         | y9 <sup>+2</sup>            | y9 <sup>+2</sup>      | b6      | y++10                  | y13 <sup>+2</sup>      | y13 <sup>+2</sup>                                                 |                       |                       |                       |                       | y6                    |         |          |          |          | y9       | y10      | y10      |
| Delta ppm               | -14.9  | -39.3   | -7.7    | 9.8              | -10.2                                         | -11.2                           | -3.5                       | -11.2                       | -11.2                 | -7.6    | -5.4                   | -4.1                   |                                                                   |                       |                       |                       |                       | -18.6                 |         |          |          |          | -8.4     | -8.1     |          |

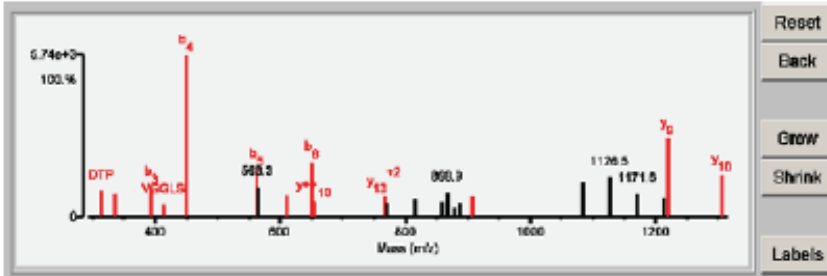

158

Detailed Results

| Rank                    | Score  | SP1 (%) | BCS    | # Unmatched Ions | Sequence                                                  | MH <sup>+</sup> Calculated (Da) | MH <sup>+</sup> Error (Da) | MH <sup>+</sup> Error (ppm) | Protein MW(pI) (Da)   | Species | Accession #            | MS-Digest Index #      | Protein Name                                                     |         |         |                       |         |         |         |          |          |          |          |          |          |
|-------------------------|--------|---------|--------|------------------|-----------------------------------------------------------|---------------------------------|----------------------------|-----------------------------|-----------------------|---------|------------------------|------------------------|------------------------------------------------------------------|---------|---------|-----------------------|---------|---------|---------|----------|----------|----------|----------|----------|----------|
| 1                       | 12.55  | 64.2    | 10     | 10/25            | (R) E E S G A (S) I (K) I (D) E (P) L (E) G S E D (R) (I) | 2291.9907                       | 0.0431                     | 18.8                        | 50976.5/5.39          | HUMAN   | <a href="#">P61978</a> | <a href="#">250155</a> | Heterogeneous nuclear ribonucleoprotein K - Homo sapiens (Human) |         |         |                       |         |         |         |          |          |          |          |          |          |
| Fragment-ion (m/z)      | 70.064 | 86.096  | 94.066 | 116.054          | 143.062                                                   | 175.119                         | 229.116                    | 451.719 <sup>+2</sup>       | 470.691 <sup>+2</sup> | 563.244 | 570.202                | 657.236                | 692.289                                                          | 695.817 | 770.326 | 771.323 <sup>+2</sup> | 805.379 | 902.433 | 940.383 | 1012.524 | 1031.473 | 1053.466 | 1146.507 | 1168.489 | 1297.527 |
| Frac. Inten. (% of TIC) | 0.00   | 0.27    | 2.02   | 2.74             | 5.28                                                      | 2.29                            | 2.69                       | 11.01                       | 6.20                  | 7.27    | 2.01                   | 3.28                   | 4.13                                                             | 1.82    | 5.58    | 2.83                  | 2.58    | 13.65   | 7.55    | 1.85     | 2.36     | 1.97     | 5.24     | 2.25     | 3.13     |
| Rel. Inten. (% of BP)   | 0.03   | 2.00    | 14.78  | 20.08            | 38.72                                                     | 16.76                           | 19.73                      | 80.85                       | 45.41                 | 53.27   | 14.75                  | 23.89                  | 30.22                                                            | 13.36   | 40.91   | 20.74                 | 18.93   | 100.00  | 55.29   | 13.56    | 17.31    | 14.46    | 38.38    | 16.47    | 22.90    |
| Score                   | 0.20   | 0.22    | -0.15  | -0.20            | -0.39                                                     | 1.50                            | 0.75                       | 1.50                        | -0.45                 | 1.50    | 0.50                   | 0.50                   | 1.50                                                             | 0.50    | 0.50    | -0.21                 | 1.50    | 1.50    | -0.55   | -0.14    | 1.50     | 1.50     | 1.50     | -0.16    | -0.23    |
| Ion-type                | PR     | LI      |        |                  |                                                           | y1                              | ID                         | y6 <sup>+2</sup>            | y5                    | b5      | b5                     | y6                     | b++11                                                            | b7      |         | y7                    | y8      |         |         | y9       |          |          | b9       |          |          |
| Delta ppm               | -10.4  | -3.8    |        |                  |                                                           | 0.8                             | -13.0                      | 11.0                        | 3.1                   | 5.8     | 8.2                    | 5.7                    | 5.7                                                              | 34.5    | 14.5    |                       | 12.4    | 12.7    |         | 9.1      |          |          | -0.7     |          | 14.4     |

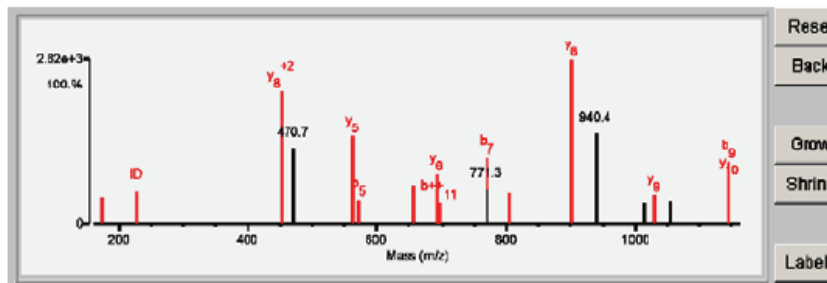

Detailed Results

| Rank | Score | SPI (%) | BCS | # Unmatched Ions | Sequence                                               | MH <sup>+</sup> Calculated (Da) | MH <sup>+</sup> Error (Da) | MH <sup>+</sup> Error (ppm) | Protein MW/pl (Da) | Species | Accession #                                      | MS-Digest Index # | Protein Name                                                        |
|------|-------|---------|-----|------------------|--------------------------------------------------------|---------------------------------|----------------------------|-----------------------------|--------------------|---------|--------------------------------------------------|-------------------|---------------------------------------------------------------------|
| 1    | 13.12 | 63.7    | 6   | 6/24             | (R)M V V N E G S D G G Q S V/Y/H V/H L/H/V/L G G R (Q) | 2635.2504                       | 0.0215                     | 8.2                         | 13802.0/6.43       | HUMAN   | <a href="#">P49773</a><br><a href="#">241365</a> |                   | Histidine triad nucleotide-binding protein 1 - Homo sapiens (Human) |

  

| Fragment-ion (m/z)          | 60.045 | 70.066 | 72.081 | 84.045 | 86.096 | 102.054 | 104.055 | 110.071 | 136.077 | 158.097 | 203.120 | 231.116 | 237.133 | 241.624 | 244.090 | 251.154 | 301.125 | 330.188 | 402.245 | 501.310 | 562.814 <sup>+2</sup> | 638.373 | 644.348 <sup>+2</sup> | 888.513 |
|-----------------------------|--------|--------|--------|--------|--------|---------|---------|---------|---------|---------|---------|---------|---------|---------|---------|---------|---------|---------|---------|---------|-----------------------|---------|-----------------------|---------|
| Frac. Inten. (% of TIC)     | 5.71   | 0.00   | 0.61   | 0.27   | 0.21   | 0.30    | 7.81    | 0.81    | 0.11    | 7.13    | 8.96    | 6.32    | 4.23    | 3.66    | 4.01    | 3.51    | 6.45    | 4.10    | 7.97    | 7.85    | 4.04                  | 5.22    | 4.15                  | 6.95    |
| Rel. Inten. (% of BP) Score | 83.73  | 0.04   | 6.85   | 3.02   | 2.33   | 3.34    | 84.85   | 6.83    | 1.28    | 79.55   | 100.00  | 70.48   | 47.18   | 40.71   | 44.77   | 39.18   | 72.01   | 45.75   | 88.98   | 87.54   | 46.11                 | 58.29   | 46.29                 | 77.58   |
| Ion-type                    |        | PR     | V      | E      | LI     | E       | H       | Y       |         | y1-NH3  |         |         | HV      |         | NE      | y++5    | YH      |         | y4      | y5      | y10 <sup>+2</sup>     | y6      | y11 <sup>+2</sup>     | y8      |
| Delta ppm                   |        | 8.2    | 0.3    |        | -10.8  | -9.4    |         | -2.5    | 12.8    | 29.1    |         |         | -11.0   |         | -16.0   | -26.3   | -20.0   |         | -2.8    | -8.1    | -20.0                 | -0.7    | -13.6                 | -3.2    |

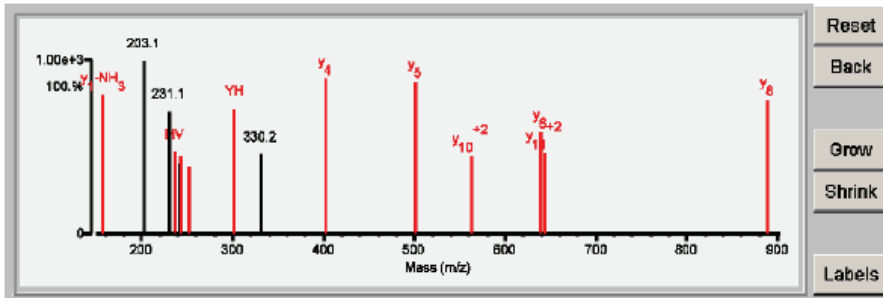

Detailed Results

| Rank | Score | SPI (%) | BCS | # Unmatched Ions | Sequence                                                       | MH <sup>+</sup> Calculated (Da) | MH <sup>+</sup> Error (Da) | MH <sup>+</sup> Error (ppm) | Protein MW/pl (Da) | Species | Accession #                                      | MS-Digest Index # | Protein Name                                                        |
|------|-------|---------|-----|------------------|----------------------------------------------------------------|---------------------------------|----------------------------|-----------------------------|--------------------|---------|--------------------------------------------------|-------------------|---------------------------------------------------------------------|
| 1    | 12.08 | 65.4    | 7   | 12/25            | (A)A G V T D G N E V A K A Q Q A I T P G G A A P T I F S R (I) | 2837.3345                       | 0.0150                     | 5.3                         | 17161.8/9.20       | HUMAN   | <a href="#">Q9BX68</a><br><a href="#">241377</a> |                   | Histidine triad nucleotide-binding protein 2 - Homo sapiens (Human) |

  

| Fragment-ion (m/z)          | 72.081 | 200.100 | 283.132 | 316.128 | 373.199 | 409.224 | 417.189 | 471.268 | 502.252 | 537.287 <sup>+2</sup> | 587.823 | 614.327 | 720.402 | 774.742 | 788.342 | 791.439 | 829.784 | 832.334 <sup>+2</sup> | 834.375 | 881.167 | 912.332 | 915.048 <sup>+2</sup> | 1073.579 | 1174.611 | 1278.644 |
|-----------------------------|--------|---------|---------|---------|---------|---------|---------|---------|---------|-----------------------|---------|---------|---------|---------|---------|---------|---------|-----------------------|---------|---------|---------|-----------------------|----------|----------|----------|
| Frac. Inten. (% of TIC)     | 0.26   | 1.90    | 2.56    | 5.57    | 2.67    | 2.38    | 2.90    | 1.92    | 2.89    | 12.47                 | 2.26    | 2.05    | 5.38    | 2.09    | 2.20    | 3.18    | 5.33    | 4.14                  | 3.76    | 3.19    | 2.42    | 2.24                  | 18.00    | 4.44     | 3.80     |
| Rel. Inten. (% of BP) Score | 1.43   | 10.56   | 14.24   | 30.94   | 14.84   | 13.23   | 16.11   | 10.67   | 16.07   | 69.25                 | 12.53   | 11.38   | 29.85   | 11.81   | 12.23   | 17.64   | 29.58   | 22.97                 | 20.89   | 17.71   | 13.45   | 12.44                 | 100.00   | 24.68    | 21.10    |
| Ion-type                    |        | V       | GAA     | PGGA    | b3      | y3      | b4      |         |         | y1 <sup>+2</sup>      | y++12   |         | y6      |         |         | y7      |         | b15 <sup>+2</sup>     |         |         |         |                       | y11      | y12      |          |
| Delta ppm                   | 1.7    | -22.8   | -31.7   | -17.2   |         | 10.3    | 18.1    |         |         | -6.8                  | 15.5    |         | -2.5    |         |         | -2.7    |         | -36.8                 |         |         |         |                       | 4.8      | -9.1     |          |

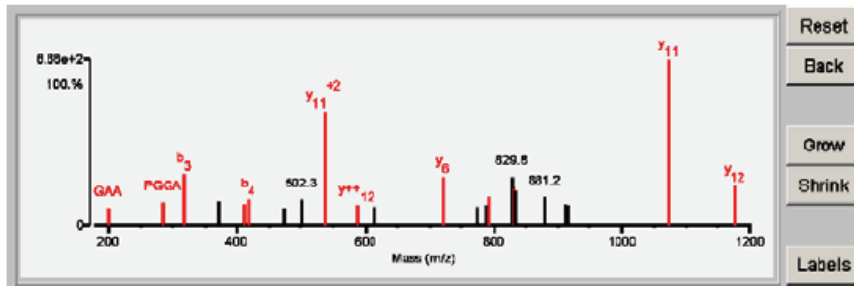

Detailed Results

| Rank | Score | SPI (%) | BCS | # Unmatched Ions | Sequence                                                                                                                                      | MH <sup>+</sup> Calculated (Da) | MH <sup>+</sup> Error (Da) | MH <sup>+</sup> Error (ppm) | Protein MW (Da) | Species | Accession #            | MS-Digest Index #      | Protein Name                                    |
|------|-------|---------|-----|------------------|-----------------------------------------------------------------------------------------------------------------------------------------------|---------------------------------|----------------------------|-----------------------------|-----------------|---------|------------------------|------------------------|-------------------------------------------------|
| 1    | 11.85 | 71.1    | 7   | 8/25             | (R)A <sup>+</sup> Q <sup>+</sup> L <sup>+</sup> G <sup>+</sup> F <sup>+</sup> F <sup>+</sup> V <sup>+</sup> A <sup>+</sup> R <sup>+</sup> (I) | 1032.5295                       | 0.0038                     | 3.7                         | 14233.6/10.88   | HUMAN   | <a href="#">Q89QV8</a> | <a href="#">230885</a> | Histone H2A type 1-A - Homo sapiens (Human)     |
| 1    | 11.85 | 71.1    | 7   | 8/25             | (R)A <sup>+</sup> Q <sup>+</sup> L <sup>+</sup> G <sup>+</sup> F <sup>+</sup> F <sup>+</sup> V <sup>+</sup> A <sup>+</sup> R <sup>+</sup> (V) | 1032.5295                       | 0.0038                     | 3.7                         | 14135.6/11.05   | HUMAN   | <a href="#">P04998</a> | <a href="#">230887</a> | Histone H2A type 1-B - Homo sapiens (Human)     |
| 1    | 11.85 | 71.1    | 7   | 8/25             | (R)A <sup>+</sup> Q <sup>+</sup> L <sup>+</sup> G <sup>+</sup> F <sup>+</sup> F <sup>+</sup> V <sup>+</sup> A <sup>+</sup> R <sup>+</sup> (I) | 1032.5295                       | 0.0038                     | 3.7                         | 14106.5/11.05   | HUMAN   | <a href="#">Q30877</a> | <a href="#">230889</a> | Histone H2A type 1-C - Homo sapiens (Human)     |
| 1    | 11.85 | 71.1    | 7   | 8/25             | (R)A <sup>+</sup> Q <sup>+</sup> L <sup>+</sup> G <sup>+</sup> F <sup>+</sup> F <sup>+</sup> V <sup>+</sup> A <sup>+</sup> R <sup>+</sup> (V) | 1032.5295                       | 0.0038                     | 3.7                         | 14107.5/10.90   | HUMAN   | <a href="#">P20621</a> | <a href="#">230893</a> | Histone H2A type 1-D - Homo sapiens (Human)     |
| 1    | 11.85 | 71.1    | 7   | 8/25             | (R)A <sup>+</sup> Q <sup>+</sup> L <sup>+</sup> G <sup>+</sup> F <sup>+</sup> F <sup>+</sup> V <sup>+</sup> A <sup>+</sup> R <sup>+</sup> (I) | 1032.5295                       | 0.0038                     | 3.7                         | 14135.6/11.05   | HUMAN   | <a href="#">P20951</a> | <a href="#">230895</a> | Histone H2A type 1-E - Homo sapiens (Human)     |
| 1    | 11.85 | 71.1    | 7   | 8/25             | (R)A <sup>+</sup> Q <sup>+</sup> L <sup>+</sup> G <sup>+</sup> F <sup>+</sup> F <sup>+</sup> V <sup>+</sup> A <sup>+</sup> R <sup>+</sup> (V) | 1032.5295                       | 0.0038                     | 3.7                         | 13906.3/10.88   | HUMAN   | <a href="#">Q89KX5</a> | <a href="#">230793</a> | Histone H2A type 1-H - Homo sapiens (Human)     |
| 1    | 11.85 | 71.1    | 7   | 8/25             | (R)A <sup>+</sup> Q <sup>+</sup> L <sup>+</sup> G <sup>+</sup> F <sup>+</sup> F <sup>+</sup> V <sup>+</sup> A <sup>+</sup> R <sup>+</sup> (V) | 1032.5295                       | 0.0038                     | 3.7                         | 13936.3/10.88   | HUMAN   | <a href="#">Q89K73</a> | <a href="#">230797</a> | Histone H2A type 1-J - Homo sapiens (Human)     |
| 1    | 11.85 | 71.1    | 7   | 8/25             | (R)A <sup>+</sup> Q <sup>+</sup> L <sup>+</sup> G <sup>+</sup> F <sup>+</sup> F <sup>+</sup> V <sup>+</sup> A <sup>+</sup> R <sup>+</sup> (V) | 1032.5295                       | 0.0038                     | 3.7                         | 14091.5/10.90   | HUMAN   | <a href="#">P0C058</a> | <a href="#">230723</a> | Histone H2A type 1 - Homo sapiens (Human)       |
| 1    | 11.85 | 71.1    | 7   | 8/25             | (R)A <sup>+</sup> Q <sup>+</sup> L <sup>+</sup> G <sup>+</sup> F <sup>+</sup> F <sup>+</sup> V <sup>+</sup> A <sup>+</sup> R <sup>+</sup> (V) | 1032.5295                       | 0.0038                     | 3.7                         | 14095.6/10.90   | HUMAN   | <a href="#">G8F113</a> | <a href="#">230783</a> | Histone H2A type 2-A - Homo sapiens (Human)     |
| 1    | 11.85 | 71.1    | 7   | 8/25             | (R)A <sup>+</sup> Q <sup>+</sup> L <sup>+</sup> G <sup>+</sup> F <sup>+</sup> F <sup>+</sup> V <sup>+</sup> A <sup>+</sup> R <sup>+</sup> (V) | 1032.5295                       | 0.0038                     | 3.7                         | 13995.6/10.88   | HUMAN   | <a href="#">G8IUE8</a> | <a href="#">230787</a> | Histone H2A type 2-B - Homo sapiens (Human)     |
| 1    | 11.85 | 71.1    | 7   | 8/25             | (R)A <sup>+</sup> Q <sup>+</sup> L <sup>+</sup> G <sup>+</sup> F <sup>+</sup> F <sup>+</sup> V <sup>+</sup> A <sup>+</sup> R <sup>+</sup> (V) | 1032.5295                       | 0.0038                     | 3.7                         | 13988.4/10.90   | HUMAN   | <a href="#">G18777</a> | <a href="#">230773</a> | Histone H2A type 2-C - Homo sapiens (Human)     |
| 1    | 11.85 | 71.1    | 7   | 8/25             | (R)A <sup>+</sup> Q <sup>+</sup> L <sup>+</sup> G <sup>+</sup> F <sup>+</sup> F <sup>+</sup> V <sup>+</sup> A <sup>+</sup> R <sup>+</sup> (V) | 1032.5295                       | 0.0038                     | 3.7                         | 14121.5/11.05   | HUMAN   | <a href="#">Q7L7L0</a> | <a href="#">230823</a> | Histone H2A type 3 - Homo sapiens (Human)       |
| 1    | 11.85 | 71.1    | 7   | 8/25             | (R)A <sup>+</sup> Q <sup>+</sup> L <sup>+</sup> G <sup>+</sup> F <sup>+</sup> F <sup>+</sup> V <sup>+</sup> A <sup>+</sup> R <sup>+</sup> (I) | 1032.5295                       | 0.0038                     | 3.7                         | 13568.7/10.58   | HUMAN   | <a href="#">Q71U09</a> | <a href="#">230921</a> | Histone H2A <sup>v</sup> - Homo sapiens (Human) |
| 1    | 11.85 | 71.1    | 7   | 8/25             | (R)A <sup>+</sup> Q <sup>+</sup> L <sup>+</sup> G <sup>+</sup> F <sup>+</sup> F <sup>+</sup> V <sup>+</sup> A <sup>+</sup> R <sup>+</sup> (V) | 1032.5295                       | 0.0038                     | 3.7                         | 15144.8/10.74   | HUMAN   | <a href="#">P18104</a> | <a href="#">230957</a> | Histone H2A <sub>x</sub> - Homo sapiens (Human) |
| 1    | 11.85 | 71.1    | 7   | 8/25             | (R)A <sup>+</sup> Q <sup>+</sup> L <sup>+</sup> G <sup>+</sup> F <sup>+</sup> F <sup>+</sup> V <sup>+</sup> A <sup>+</sup> R <sup>+</sup> (V) | 1032.5295                       | 0.0038                     | 3.7                         | 13552.8/10.58   | HUMAN   | <a href="#">P0C055</a> | <a href="#">231007</a> | Histone H2A <sub>Z</sub> - Homo sapiens (Human) |

| Fragment-ion (m/z)      | 70.065 | 72.082 | 84.046 | 86.097 | 87.101 | 100.050 | 101.072 | 120.079 | 143.114 | 160.046 | 170.038 | 171.111 | 172.107 | 175.118 | 217.058 | 232.138 | 251.065 | 302.149 | 330.148 | 411.233 | 423.236 | 428.262 | 575.331 | 685.370 | 703.386 |
|-------------------------|--------|--------|--------|--------|--------|---------|---------|---------|---------|---------|---------|---------|---------|---------|---------|---------|---------|---------|---------|---------|---------|---------|---------|---------|---------|
| Frac. Inten. (% of TIC) | 0.00   | 0.11   | 3.22   | 0.88   | 3.34   | 2.37    | 0.10    | 0.10    | 3.47    | 2.12    | 2.67    | 2.48    | 2.15    | 3.89    | 2.34    | 3.48    | 6.55    | 4.04    | 7.26    | 4.91    | 2.17    | 15.88   | 10.83   | 6.48    | 9.66    |
| Rel. Inten. (% of BP)   | 0.02   | 0.70   | 20.32  | 5.41   | 21.03  | 14.92   | 0.62    | 0.62    | 21.91   | 13.38   | 16.86   | 15.63   | 13.55   | 24.56   | 14.15   | 21.58   | 25.50   | 45.96   | 28.42   | 13.71   | 100.00  | 68.31   | 40.85   | 60.92   |         |
| Score                   | 0.20   | 0.50   | -0.20  | 0.22   | -0.21  | -0.15   | 0.30    | 1.00    | 0.50    | 0.50    | 0.75    | -0.14   | 1.50    | 0.50    | 1.50    | -0.41   | 0.50    | 0.50    | 0.50    | -0.14   | 1.50    | 1.50    | -0.41   | 1.50    |         |
| Ion-type                | PR     | V      | L      | L      | L      | QK      | F       | QL-29   | b1      | b1      | QL      | y1      | b2      | b2      | b2      | b2      | b2      | b2      | b2      | b2      | b2      | b2      | b2      | b2      |         |
| Delta ppm               | 2.5    | 12.8   | 2.0    |        |        | 8.5     | -19.0   | -37.6   | 15.8    |         | -15.8   | -6.0    | -32.4   | -10.8   |         | -19.1   | -3.3    | -3.8    |         | -0.2    | 1.0     |         |         | -4.0    |         |

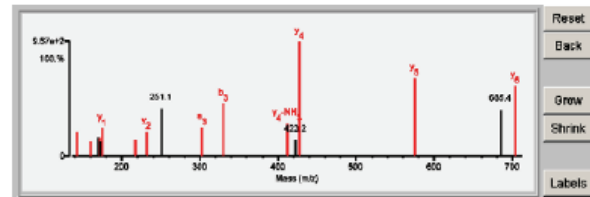

Detailed Results

| Rank | Score | SPI (%) | BCS | # Unmatched Ions | Sequence                                                                                                                                                                                                                                | MH <sup>+</sup> Calculated (Da) | MH <sup>+</sup> Error (Da) | MH <sup>+</sup> Error (ppm) | Protein MW (Da) | Species | Accession #            | MS-Digest Index #      | Protein Name                                    |
|------|-------|---------|-----|------------------|-----------------------------------------------------------------------------------------------------------------------------------------------------------------------------------------------------------------------------------------|---------------------------------|----------------------------|-----------------------------|-----------------|---------|------------------------|------------------------|-------------------------------------------------|
| 1    | 18.64 | 83.6    | 10  | 6/26             | (Y)I <sup>+</sup> L <sup>+</sup> A <sup>+</sup> R <sup>+</sup> E <sup>+</sup> I <sup>+</sup> E <sup>+</sup> I <sup>+</sup> L <sup>+</sup> A <sup>+</sup> G <sup>+</sup> H <sup>+</sup> A <sup>+</sup> A <sup>+</sup> R <sup>+</sup> (D) | 1628.7982                       | -0.0101                    | -6.8                        | 14195.8/11.06   | HUMAN   | <a href="#">P04908</a> | <a href="#">230887</a> | Histone H2A type 1-B - Homo sapiens (Human)     |
| 1    | 18.64 | 83.6    | 10  | 6/26             | (Y)I <sup>+</sup> L <sup>+</sup> A <sup>+</sup> R <sup>+</sup> E <sup>+</sup> I <sup>+</sup> E <sup>+</sup> I <sup>+</sup> L <sup>+</sup> A <sup>+</sup> G <sup>+</sup> H <sup>+</sup> A <sup>+</sup> A <sup>+</sup> R <sup>+</sup> (D) | 1628.7982                       | -0.0101                    | -6.8                        | 14106.5/11.06   | HUMAN   | <a href="#">G85077</a> | <a href="#">230889</a> | Histone H2A type 1-C - Homo sapiens (Human)     |
| 1    | 18.64 | 83.6    | 10  | 6/26             | (Y)I <sup>+</sup> L <sup>+</sup> A <sup>+</sup> R <sup>+</sup> E <sup>+</sup> I <sup>+</sup> E <sup>+</sup> I <sup>+</sup> L <sup>+</sup> A <sup>+</sup> G <sup>+</sup> H <sup>+</sup> A <sup>+</sup> A <sup>+</sup> R <sup>+</sup> (D) | 1628.7982                       | -0.0101                    | -6.8                        | 14107.5/10.90   | HUMAN   | <a href="#">P20871</a> | <a href="#">230893</a> | Histone H2A type 1-D - Homo sapiens (Human)     |
| 1    | 18.64 | 83.6    | 10  | 6/26             | (Y)I <sup>+</sup> L <sup>+</sup> A <sup>+</sup> R <sup>+</sup> E <sup>+</sup> I <sup>+</sup> E <sup>+</sup> I <sup>+</sup> L <sup>+</sup> A <sup>+</sup> G <sup>+</sup> H <sup>+</sup> A <sup>+</sup> A <sup>+</sup> R <sup>+</sup> (D) | 1628.7982                       | -0.0101                    | -6.8                        | 14195.8/11.06   | HUMAN   | <a href="#">P28001</a> | <a href="#">230896</a> | Histone H2A type 1-E - Homo sapiens (Human)     |
| 1    | 18.64 | 83.6    | 10  | 6/26             | (Y)I <sup>+</sup> L <sup>+</sup> A <sup>+</sup> R <sup>+</sup> E <sup>+</sup> I <sup>+</sup> E <sup>+</sup> I <sup>+</sup> L <sup>+</sup> A <sup>+</sup> G <sup>+</sup> H <sup>+</sup> A <sup>+</sup> A <sup>+</sup> R <sup>+</sup> (D) | 1628.7982                       | -0.0101                    | -6.8                        | 13906.3/10.88   | HUMAN   | <a href="#">G89KX6</a> | <a href="#">230793</a> | Histone H2A type 1-H - Homo sapiens (Human)     |
| 1    | 18.64 | 83.6    | 10  | 6/26             | (Y)I <sup>+</sup> L <sup>+</sup> A <sup>+</sup> R <sup>+</sup> E <sup>+</sup> I <sup>+</sup> E <sup>+</sup> I <sup>+</sup> L <sup>+</sup> A <sup>+</sup> G <sup>+</sup> H <sup>+</sup> A <sup>+</sup> A <sup>+</sup> R <sup>+</sup> (D) | 1628.7982                       | -0.0101                    | -6.8                        | 13936.3/10.88   | HUMAN   | <a href="#">G89K78</a> | <a href="#">230797</a> | Histone H2A type 1-J - Homo sapiens (Human)     |
| 1    | 18.64 | 83.6    | 10  | 6/26             | (Y)I <sup>+</sup> L <sup>+</sup> A <sup>+</sup> R <sup>+</sup> E <sup>+</sup> I <sup>+</sup> E <sup>+</sup> I <sup>+</sup> L <sup>+</sup> A <sup>+</sup> G <sup>+</sup> H <sup>+</sup> A <sup>+</sup> A <sup>+</sup> R <sup>+</sup> (D) | 1628.7982                       | -0.0101                    | -6.8                        | 14091.5/10.90   | HUMAN   | <a href="#">P0C058</a> | <a href="#">230723</a> | Histone H2A type 1 - Homo sapiens (Human)       |
| 1    | 18.64 | 83.6    | 10  | 6/26             | (Y)I <sup>+</sup> L <sup>+</sup> A <sup>+</sup> R <sup>+</sup> E <sup>+</sup> I <sup>+</sup> E <sup>+</sup> I <sup>+</sup> L <sup>+</sup> A <sup>+</sup> G <sup>+</sup> H <sup>+</sup> A <sup>+</sup> A <sup>+</sup> R <sup>+</sup> (D) | 1628.7982                       | -0.0101                    | -6.8                        | 14096.5/10.90   | HUMAN   | <a href="#">G8F113</a> | <a href="#">230783</a> | Histone H2A type 2-A - Homo sapiens (Human)     |
| 1    | 18.64 | 83.6    | 10  | 6/26             | (Y)I <sup>+</sup> L <sup>+</sup> A <sup>+</sup> R <sup>+</sup> E <sup>+</sup> I <sup>+</sup> E <sup>+</sup> I <sup>+</sup> L <sup>+</sup> A <sup>+</sup> G <sup>+</sup> H <sup>+</sup> A <sup>+</sup> A <sup>+</sup> R <sup>+</sup> (D) | 1628.7982                       | -0.0101                    | -6.8                        | 13995.6/10.88   | HUMAN   | <a href="#">G8IUE8</a> | <a href="#">230787</a> | Histone H2A type 2-B - Homo sapiens (Human)     |
| 1    | 18.64 | 83.6    | 10  | 6/26             | (Y)I <sup>+</sup> L <sup>+</sup> A <sup>+</sup> R <sup>+</sup> E <sup>+</sup> I <sup>+</sup> E <sup>+</sup> I <sup>+</sup> L <sup>+</sup> A <sup>+</sup> G <sup>+</sup> H <sup>+</sup> A <sup>+</sup> A <sup>+</sup> R <sup>+</sup> (D) | 1628.7982                       | -0.0101                    | -6.8                        | 13988.4/10.90   | HUMAN   | <a href="#">G18777</a> | <a href="#">230773</a> | Histone H2A type 2-C - Homo sapiens (Human)     |
| 1    | 18.64 | 83.6    | 10  | 6/26             | (Y)I <sup>+</sup> L <sup>+</sup> A <sup>+</sup> R <sup>+</sup> E <sup>+</sup> I <sup>+</sup> E <sup>+</sup> I <sup>+</sup> L <sup>+</sup> A <sup>+</sup> G <sup>+</sup> H <sup>+</sup> A <sup>+</sup> A <sup>+</sup> R <sup>+</sup> (D) | 1628.7982                       | -0.0101                    | -6.8                        | 14121.5/11.06   | HUMAN   | <a href="#">Q7L7L0</a> | <a href="#">230823</a> | Histone H2A type 3 - Homo sapiens (Human)       |
| 1    | 18.64 | 83.6    | 10  | 6/26             | (Y)I <sup>+</sup> L <sup>+</sup> A <sup>+</sup> R <sup>+</sup> E <sup>+</sup> I <sup>+</sup> E <sup>+</sup> I <sup>+</sup> L <sup>+</sup> A <sup>+</sup> G <sup>+</sup> H <sup>+</sup> A <sup>+</sup> A <sup>+</sup> R <sup>+</sup> (D) | 1628.7982                       | -0.0101                    | -6.8                        | 15144.8/10.74   | HUMAN   | <a href="#">P18104</a> | <a href="#">230867</a> | Histone H2A <sub>x</sub> - Homo sapiens (Human) |
| 1    | 18.64 | 83.6    | 10  | 6/26             | (Y)I <sup>+</sup> L <sup>+</sup> A <sup>+</sup> R <sup>+</sup> E <sup>+</sup> I <sup>+</sup> E <sup>+</sup> I <sup>+</sup> L <sup>+</sup> A <sup>+</sup> G <sup>+</sup> H <sup>+</sup> A <sup>+</sup> A <sup>+</sup> R <sup>+</sup> (D) | 1628.7982                       | -0.0101                    | -6.8                        | 39817.3/9.80    | HUMAN   | <a href="#">O76387</a> | <a href="#">230867</a> | Core histone macro-H2A.1 - Homo sapiens (Human) |

| Fragment-ion (m/z)      | 88.090 | 176.121 | 248.151 | 302.194 | 336.198 | 348.700 <sup>2+</sup> | 366.152 | 374.168 | 431.241 | 451.101 | 471.244 | 488.257 | 503.217 | 604.228 <sup>2+</sup> | 659.296 | 618.295 | 672.374 | 700.376 | 739.394 | 801.421 | 868.427 | 882.530 | 914.490 | 971.603 | 1027.582 |
|-------------------------|--------|---------|---------|---------|---------|-----------------------|---------|---------|---------|---------|---------|---------|---------|-----------------------|---------|---------|---------|---------|---------|---------|---------|---------|---------|---------|----------|
| Frac. Inten. (% of TIC) | 0.13   | 1.83    | 2.03    | 4.43    | 4.25    | 1.50                  | 3.89    | 2.15    | 2.65    | 5.27    | 2.51    | 5.93    | 5.65    | 1.57                  | 6.53    | 5.17    | 4.23    | 1.94    | 6.25    | 6.23    | 5.55    | 1.89    | 4.80    | 2.42    | 2.90     |
| Rel. Inten. (% of BP)   | 1.35   | 18.61   | 20.81   | 45.61   | 43.37   | 16.32                 | 39.62   | 21.88   | 27.94   | 53.62   | 26.52   | 100.00  | 87.51   | 16.00                 | 66.48   | 53.29   | 42.98   | 19.70   | 63.66   | 63.43   | 57.49   | 19.38   | 48.88   | 24.60   | 39.94    |
| Score                   | 0.22   | 1.50    | 1.50    | 0.75    | -0.43   | -0.16                 | 0.25    | 0.50    | 1.50    | -0.54   | 0.50    | 1.50    | 0.50    | -0.16                 | 1.50    | 0.50    | 1.50    | -0.20   | 0.50    | 1.50    | 0.50    | -0.19   | 1.50    | 0.50    | 1.50     |
| Ion-type                | LI     | y1      | y2      | TAE     | TAE     | b3+H2O                | b3      | b4      | y5+H3   | b5      | y6      | b6      | y7      | b7                    | b8      | b8      | b7      | b7      | b6      | b6      | b7      | b7      | b6      | y9      | y10      |
| Delta ppm               | -0.3   | 10.5    | -19.0   | -4.8    |         | -35.2                 | -21.2   | 10.7    |         |         | 26.7    | -0.8    | -2.6    |                       | 1.1     | -11.0   | -6.5    |         | 10.8    | -0.1    | -2.2    |         | -6.5    | -9.8    |          |

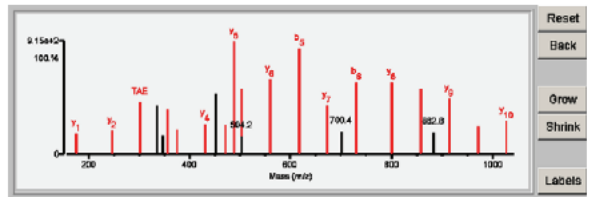

Detailed Results

| Rank | Score | SP1 (%) | BCS | # Unmatched Ions | Sequence                            | MH <sup>+</sup> Calculated (Da) | MH <sup>+</sup> Error (Da) | MH <sup>+</sup> Error (ppm) | Protein MW (kDa) | Species | Accession # | M8-Digest Index # | Protein Name                                    |
|------|-------|---------|-----|------------------|-------------------------------------|---------------------------------|----------------------------|-----------------------------|------------------|---------|-------------|-------------------|-------------------------------------------------|
| 1    | 13.64 | 78.1    | 10  | 8/25             | (L)E YVAVFA EIT/LEI/A/G/H A A R (D) | 1821.9051                       | -0.0118                    | -6.4                        | 14136.8/11.06    | HUMAN   | P54988      | 230887            | Histone H2A type 1-B - Homo sapiens (Human)     |
| 1    | 13.64 | 78.1    | 10  | 8/25             | (L)E YVAVFA EIT/LEI/A/G/H A A R (D) | 1821.9051                       | -0.0118                    | -6.4                        | 14106.6/11.06    | HUMAN   | Q93077      | 230888            | Histone H2A type 1-C - Homo sapiens (Human)     |
| 1    | 13.64 | 78.1    | 10  | 8/25             | (L)E YVAVFA EIT/LEI/A/G/H A A R (D) | 1821.9051                       | -0.0118                    | -6.4                        | 14107.6/10.90    | HUMAN   | P20871      | 230889            | Histone H2A type 1-D - Homo sapiens (Human)     |
| 1    | 13.64 | 78.1    | 10  | 8/25             | (L)E YVAVFA EIT/LEI/A/G/H A A R (D) | 1821.9051                       | -0.0118                    | -6.4                        | 14136.8/11.06    | HUMAN   | P28001      | 230886            | Histone H2A type 1-E - Homo sapiens (Human)     |
| 1    | 13.64 | 78.1    | 10  | 8/25             | (L)E YVAVFA EIT/LEI/A/G/H A A R (D) | 1821.9051                       | -0.0118                    | -6.4                        | 13908.3/10.88    | HUMAN   | Q98K6       | 230705            | Histone H2A type 1-H - Homo sapiens (Human)     |
| 1    | 13.64 | 78.1    | 10  | 8/25             | (L)E YVAVFA EIT/LEI/A/G/H A A R (D) | 1821.9051                       | -0.0118                    | -6.4                        | 13908.3/10.88    | HUMAN   | Q98878      | 230707            | Histone H2A type 1-J - Homo sapiens (Human)     |
| 1    | 13.64 | 78.1    | 10  | 8/25             | (L)E YVAVFA EIT/LEI/A/G/H A A R (D) | 1821.9051                       | -0.0118                    | -6.4                        | 14091.6/10.90    | HUMAN   | PDC888      | 230723            | Histone H2A type 1 - Homo sapiens (Human)       |
| 1    | 13.64 | 78.1    | 10  | 8/25             | (L)E YVAVFA EIT/LEI/A/G/H A A R (D) | 1821.9051                       | -0.0118                    | -6.4                        | 14096.6/10.90    | HUMAN   | Q8F113      | 230783            | Histone H2A type 2-A - Homo sapiens (Human)     |
| 1    | 13.64 | 78.1    | 10  | 8/25             | (L)E YVAVFA EIT/LEI/A/G/H A A R (D) | 1821.9051                       | -0.0118                    | -6.4                        | 13996.4/10.88    | HUMAN   | Q8IUE6      | 230787            | Histone H2A type 2-B - Homo sapiens (Human)     |
| 1    | 13.64 | 78.1    | 10  | 8/25             | (L)E YVAVFA EIT/LEI/A/G/H A A R (D) | 1821.9051                       | -0.0118                    | -6.4                        | 13888.4/10.90    | HUMAN   | Q18777      | 230773            | Histone H2A type 2-C - Homo sapiens (Human)     |
| 1    | 13.64 | 78.1    | 10  | 8/25             | (L)E YVAVFA EIT/LEI/A/G/H A A R (D) | 1821.9051                       | -0.0118                    | -6.4                        | 14121.6/11.06    | HUMAN   | Q7L7L0      | 230823            | Histone H2A type 3 - Homo sapiens (Human)       |
| 1    | 13.64 | 78.1    | 10  | 8/25             | (L)E YVAVFA EIT/LEI/A/G/H A A R (D) | 1821.9051                       | -0.0118                    | -6.4                        | 15144.8/10.74    | HUMAN   | P18104      | 230867            | Histone H2A.x - Homo sapiens (Human)            |
| 1    | 13.64 | 78.1    | 10  | 8/25             | (L)E YVAVFA EIT/LEI/A/G/H A A R (D) | 1821.9051                       | -0.0118                    | -6.4                        | 88817.3/8.80     | HUMAN   | Q76387      | 230887            | Core histone macro-H2A.1 - Homo sapiens (Human) |

  

| Fragment-Ion (m/z)      | 88.088 | 198.078 | 147.077 | 381.116 | 410.283 | 431.238 | 471.222 | 488.263 | 484.202 | 568.288 | 577.223 | 586.246 | 647.278 | 672.378 | 700.208 | 772.407*2 | 782.288*2 | 796.324 | 801.416 | 914.006 | 914.481 | 1021.487 | 1027.673 | 1086.372 | 1160.628 |
|-------------------------|--------|---------|---------|---------|---------|---------|---------|---------|---------|---------|---------|---------|---------|---------|---------|-----------|-----------|---------|---------|---------|---------|----------|----------|----------|----------|
| Frag. Inten. (% of TIC) | 0.17   | 0.07    | 2.59    | 7.17    | 2.05    | 2.73    | 2.73    | 11.56   | 3.42    | 7.85    | 4.15    | 2.14    | 4.37    | 4.33    | 2.85    | 2.26      | 2.53      | 5.89    | 8.47    | 2.09    | 4.22    | 5.62     | 2.71     | 2.36     | 4.46     |
| Rel. Inten. (% of BP)   | 1.46   | 0.81    | 25.00   | 69.91   | 17.11   | 22.95   | 22.91   | 100.00  | 26.62   | 65.62   | 34.55   | 17.89   | 41.57   | 36.17   | 22.15   | 18.92     | 21.18     | 49.27   | 70.82   | 17.51   | 35.20   | 46.98    | 22.63    | 19.76    | 37.27    |
| Score                   | 0.22   | 1.20    | -0.26   | 0.93    | -0.17   | 1.50    | 0.50    | 1.50    | 0.50    | 0.35    | 0.50    | -0.42   | 1.50    | -0.22   | -0.15   | -0.21     | 0.50      | 1.50    | -0.18   | 1.50    | 0.50    | 1.50     | 0.50     | 1.50     | -0.20    |
| Ion-type                | LI     | Y       | b2      | b2      | Y4      | Y5-NH3  | Y5      | b3      | b3      | Y5      | b4+H2O  | b4      | Y7      | Y7      | Y7      | Y7        | Y7        | b5      | Y5      | Y5      | Y5      | Y5       | Y10      | b5       | b5       |
| Delta ppm               | 21.8   | 24.3    |         | 6.5     |         | 4.4     | -19.4   | -9.6    | 10.0    | 1.6     | -19.0   | 1.1     |         | -3.5    |         |           |           | 0.6     | -8.4    |         | -15.3   | -6.4     | -16.5    | -5.2     |          |

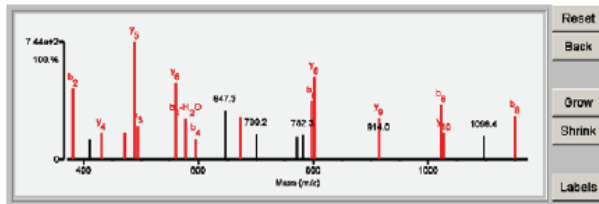

Detailed Results

| Rank | Score | SP1 (%) | BCS | # Unmatched Ions | Sequence                      | MH <sup>+</sup> Calculated (Da) | MH <sup>+</sup> Error (Da) | MH <sup>+</sup> Error (ppm) | Protein MW (kDa) | Species | Accession # | M8-Digest Index # | Protein Name                                    |
|------|-------|---------|-----|------------------|-------------------------------|---------------------------------|----------------------------|-----------------------------|------------------|---------|-------------|-------------------|-------------------------------------------------|
| 1    | 14.80 | 86.3    | 9   | 8/25             | (T)A EIVLEIIEIA/G/H A A R (D) | 1316.8876                       | 0.0037                     | 2.8                         | 14136.8/11.06    | HUMAN   | P54988      | 230887            | Histone H2A type 1-B - Homo sapiens (Human)     |
| 1    | 14.80 | 86.3    | 9   | 8/25             | (T)A EIVLEIIEIA/G/H A A R (D) | 1316.8876                       | 0.0037                     | 2.8                         | 14106.6/11.06    | HUMAN   | Q93077      | 230888            | Histone H2A type 1-C - Homo sapiens (Human)     |
| 1    | 14.80 | 86.3    | 9   | 8/25             | (T)A EIVLEIIEIA/G/H A A R (D) | 1316.8876                       | 0.0037                     | 2.8                         | 14107.6/10.90    | HUMAN   | P20871      | 230889            | Histone H2A type 1-D - Homo sapiens (Human)     |
| 1    | 14.80 | 86.3    | 9   | 8/25             | (T)A EIVLEIIEIA/G/H A A R (D) | 1316.8876                       | 0.0037                     | 2.8                         | 14136.8/11.06    | HUMAN   | P28001      | 230886            | Histone H2A type 1-E - Homo sapiens (Human)     |
| 1    | 14.80 | 86.3    | 9   | 8/25             | (T)A EIVLEIIEIA/G/H A A R (D) | 1316.8876                       | 0.0037                     | 2.8                         | 13908.3/10.88    | HUMAN   | Q98K6       | 230705            | Histone H2A type 1-H - Homo sapiens (Human)     |
| 1    | 14.80 | 86.3    | 9   | 8/25             | (T)A EIVLEIIEIA/G/H A A R (D) | 1316.8876                       | 0.0037                     | 2.8                         | 13908.3/10.88    | HUMAN   | Q98878      | 230707            | Histone H2A type 1-J - Homo sapiens (Human)     |
| 1    | 14.80 | 86.3    | 9   | 8/25             | (T)A EIVLEIIEIA/G/H A A R (D) | 1316.8876                       | 0.0037                     | 2.8                         | 14091.6/10.90    | HUMAN   | PDC888      | 230723            | Histone H2A type 1 - Homo sapiens (Human)       |
| 1    | 14.80 | 86.3    | 9   | 8/25             | (T)A EIVLEIIEIA/G/H A A R (D) | 1316.8876                       | 0.0037                     | 2.8                         | 14096.6/10.90    | HUMAN   | Q8F113      | 230783            | Histone H2A type 2-A - Homo sapiens (Human)     |
| 1    | 14.80 | 86.3    | 9   | 8/25             | (T)A EIVLEIIEIA/G/H A A R (D) | 1316.8876                       | 0.0037                     | 2.8                         | 13996.4/10.88    | HUMAN   | Q8IUE6      | 230787            | Histone H2A type 2-B - Homo sapiens (Human)     |
| 1    | 14.80 | 86.3    | 9   | 8/25             | (T)A EIVLEIIEIA/G/H A A R (D) | 1316.8876                       | 0.0037                     | 2.8                         | 13888.4/10.90    | HUMAN   | Q18777      | 230773            | Histone H2A type 2-C - Homo sapiens (Human)     |
| 1    | 14.80 | 86.3    | 9   | 8/25             | (T)A EIVLEIIEIA/G/H A A R (D) | 1316.8876                       | 0.0037                     | 2.8                         | 14121.6/11.06    | HUMAN   | Q7L7L0      | 230823            | Histone H2A type 3 - Homo sapiens (Human)       |
| 1    | 14.80 | 86.3    | 9   | 8/25             | (A)A EIVLEIIEIA/G/H A A R (D) | 1316.8876                       | 0.0037                     | 2.8                         | 40068.4/8.71     | HUMAN   | Q8P888      | 230937            | Core histone macro-H2A.2 - Homo sapiens (Human) |
| 1    | 14.80 | 86.3    | 9   | 8/25             | (T)A EIVLEIIEIA/G/H A A R (D) | 1316.8876                       | 0.0037                     | 2.8                         | 15144.8/10.74    | HUMAN   | P18104      | 230867            | Histone H2A.x - Homo sapiens (Human)            |
| 1    | 14.80 | 86.3    | 9   | 8/25             | (T)A EIVLEIIEIA/G/H A A R (D) | 1316.8876                       | 0.0037                     | 2.8                         | 88817.3/8.80     | HUMAN   | Q76387      | 230887            | Core histone macro-H2A.1 - Homo sapiens (Human) |

  

| Fragment-Ion (m/z)      | 88.088 | 160.034 | 176.118 | 246.167 | 260.988 | 288.086 | 311.098 | 329.142 | 374.188 | 402.194 | 431.234 | 471.247 | 488.254 | 516.258 | 528.270 | 568.287 | 681.302*2 | 674.268*2 | 844.280 | 872.376 | 930.388 | 957.378 | 801.450 | 804.043 | 914.607 |
|-------------------------|--------|---------|---------|---------|---------|---------|---------|---------|---------|---------|---------|---------|---------|---------|---------|---------|-----------|-----------|---------|---------|---------|---------|---------|---------|---------|
| Frag. Inten. (% of TIC) | 0.05   | 2.52    | 2.19    | 2.19    | 1.41    | 6.88    | 2.11    | 1.23    | 4.24    | 13.14   | 1.52    | 1.47    | 13.29   | 6.81    | 1.33    | 6.97    | 1.47      | 1.28      | 7.72    | 4.30    | 1.26    | 2.24    | 7.11    | 2.08    | 6.37    |
| Rel. Inten. (% of BP)   | 0.71   | 19.21   | 16.66   | 16.66   | 10.71   | 52.16   | 16.09   | 9.35    | 30.73   | 100.00  | 11.56   | 12.74   | 98.86   | 52.60   | 10.13   | 53.06   | 9.71      | 58.73     | 32.75   | 9.73    | 17.01   | 64.16   | 15.81   | 40.86   |         |
| Score                   | 0.22   | -0.19   | 1.50    | 1.50    | -0.11   | 0.50    | -0.16   | -0.09   | 0.50    | 0.50    | 1.50    | 0.50    | 1.50    | 0.50    | -0.10   | 1.50    | -0.11     | -0.10     | 0.50    | 1.50    | -0.10   | 0.50    | 1.50    | -0.16   | 1.50    |
| Ion-type                | LI     | LI      | Y1      | Y2      | Y2      | b2      | b2      | b2      | b2      | b2      | b2      | b2      | b4      | b4      | b4      | b4      | b4        | b4        | b4      | b4      | b4      | b4      | b4      | b4      | b4      |
| Delta ppm               |        |         | -7.3    |         | -4.9    | 4.2     |         |         | -8.8    |         | -24.4   | -14.7   | -4.0    | 33.5    | -6.9    | -2.7    |           |           | -13.7   |         |         | -10.2   | -5.4    |         | -4.7    |

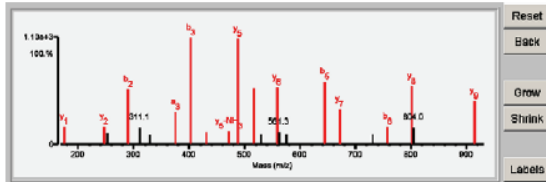



Detailed Results

| Rank | Score | SP1 (%) | BCS | # Unmatched Ions | Sequence            | MH <sup>+</sup> Calculated (Da) | MH <sup>+</sup> Error (Da) | MH <sup>+</sup> Error (ppm) | Protein MW/pI (Da) | Species | Accession # | MS-Digest Index # | Protein Name                                        |
|------|-------|---------|-----|------------------|---------------------|---------------------------------|----------------------------|-----------------------------|--------------------|---------|-------------|-------------------|-----------------------------------------------------|
| 1    | 17.92 | 88.8    | 8   | 6/26             | (8) F1V1K/D 2/F3K/I | 1127.6190                       | 0.0071                     | 6.3                         | 13860.2/10.31      | HUMAN   | P33778      | 231181            | Histone H2B type 1-B - Homo sapiens (Human)         |
| 1    | 17.92 | 88.8    | 8   | 6/26             | (8) F1V1K/D 2/F3K/I | 1127.6190                       | 0.0071                     | 6.3                         | 13819.1/10.31      | HUMAN   | P62867      | 231186            | Histone H2B type 1-C/E/F/G/I - Homo sapiens (Human) |
| 1    | 17.92 | 88.8    | 8   | 6/26             | (8) F1V1K/D 2/F3K/I | 1127.6190                       | 0.0071                     | 6.3                         | 13898.2/10.31      | HUMAN   | P68876      | 231189            | Histone H2B type 1-D - Homo sapiens (Human)         |
| 1    | 17.92 | 88.8    | 8   | 6/26             | (8) F1V1K/D 2/F3K/I | 1127.6190                       | 0.0071                     | 6.3                         | 13862.2/10.31      | HUMAN   | Q83078      | 231193            | Histone H2B type 1-H - Homo sapiens (Human)         |
| 1    | 17.92 | 88.8    | 8   | 6/26             | (8) F1V1K/D 2/F3K/I | 1127.6190                       | 0.0071                     | 6.3                         | 13864.2/10.31      | HUMAN   | P08889      | 231197            | Histone H2B type 1-J - Homo sapiens (Human)         |
| 1    | 17.92 | 88.8    | 8   | 6/26             | (8) F1V1K/D 2/F3K/I | 1127.6190                       | 0.0071                     | 6.3                         | 13890.2/10.31      | HUMAN   | Q80814      | 231201            | Histone H2B type 1-K - Homo sapiens (Human)         |
| 1    | 17.92 | 88.8    | 8   | 6/26             | (8) F1V1K/D 2/F3K/I | 1127.6190                       | 0.0071                     | 6.3                         | 13862.2/10.31      | HUMAN   | Q89880      | 231207            | Histone H2B type 1-L - Homo sapiens (Human)         |
| 1    | 17.92 | 88.8    | 8   | 6/26             | (8) F1V1K/D 2/F3K/I | 1127.6190                       | 0.0071                     | 6.3                         | 13889.2/10.31      | HUMAN   | Q89878      | 231209            | Histone H2B type 1-M - Homo sapiens (Human)         |
| 1    | 17.92 | 88.8    | 8   | 6/26             | (8) F1V1K/D 2/F3K/I | 1127.6190                       | 0.0071                     | 6.3                         | 13822.2/10.31      | HUMAN   | Q89877      | 231216            | Histone H2B type 1-N - Homo sapiens (Human)         |
| 1    | 17.92 | 88.8    | 8   | 6/26             | (8) F1V1K/D 2/F3K/I | 1127.6190                       | 0.0071                     | 6.3                         | 13808.2/10.31      | HUMAN   | P23627      | 231217            | Histone H2B type 1-O - Homo sapiens (Human)         |
| 1    | 17.92 | 88.8    | 8   | 6/26             | (8) F1V1K/D 2/F3K/I | 1127.6190                       | 0.0071                     | 6.3                         | 13820.2/10.31      | HUMAN   | Q18278      | 231277            | Histone H2B type 2-E - Homo sapiens (Human)         |
| 1    | 17.92 | 88.8    | 8   | 6/26             | (8) F1V1K/D 2/F3K/I | 1127.6190                       | 0.0071                     | 6.3                         | 13820.2/10.31      | HUMAN   | Q6GNW8      | 231283            | Histone H2B type 2-F - Homo sapiens (Human)         |
| 1    | 17.92 | 88.8    | 8   | 6/26             | (8) F1V1K/D 2/F3K/I | 1127.6190                       | 0.0071                     | 6.3                         | 13868.2/10.31      | HUMAN   | Q8N267      | 231323            | Histone H2B type 2-B - Homo sapiens (Human)         |
| 1    | 17.92 | 88.8    | 8   | 6/26             | (8) F1V1K/D 2/F3K/I | 1127.6190                       | 0.0071                     | 6.3                         | 13844.2/10.37      | HUMAN   | P67063      | 231418            | Histone H2B type F-B - Homo sapiens (Human)         |

  

| Fragment-Ion (m/z)      | 70.084 | 72.081 | 73.086 | 88.080 | 120.082 | 176.120 | 208.078 | 210.070 | 214.123 | 238.077 | 304.168 | 328.144 | 356.141 | 386.210 | 387.207 | 430.296 | 434.290 | 448.733 | 461.228 | 488.181 | 878.341 | 778.348 | 793.372 | 876.441 | 882.463 |
|-------------------------|--------|--------|--------|--------|---------|---------|---------|---------|---------|---------|---------|---------|---------|---------|---------|---------|---------|---------|---------|---------|---------|---------|---------|---------|---------|
| Frac. Inten. (% of TIC) | 0.00   | 1.05   | 3.52   | 0.11   | 0.22    | 3.41    | 6.33    | 1.72    | 2.86    | 3.82    | 2.19    | 3.28    | 3.67    | 2.16    | 2.32    | 1.72    | 1.97    | 2.01    | 7.97    | 2.10    | 10.28   | 5.50    | 22.14   | 2.80    | 6.86    |
| Rel. Inten. (% of BP)   | 0.01   | 4.75   | 15.91  | 0.50   | 0.98    | 14.41   | 28.59   | 7.78    | 12.90   | 17.27   | 9.90    | 14.81   | 16.57   | 9.76    | 10.48   | 7.75    | 8.88    | 9.08    | 36.01   | 5.47    | 46.45   | 24.83   | 100.00  | 12.65   | 30.96   |
| Score                   | 0.20   | 0.50   | -0.16  | 0.22   | 1.00    | 1.50    | 0.50    | -0.08   | 0.75    | 0.50    | 1.50    | 0.75    | 0.50    | -0.10   | 1.50    | -0.08   | 0.50    | 1.50    | 1.50    | -0.09   | 1.50    | 0.50    | 1.50    | 0.50    | 1.50    |
| Ion-type                | FR     | V      | LI     | F      | LI      | F       | LI      | FR      | V       | LI      | F       | VND     | b2      | y+4     | y+1     | y       | y       | y       | y       | y       | y       | y       | y       | y       | y       |
| Delta ppm               | -18.9  | -2.4   | 19.4   | 6.0    | 7.1     | -7.5    |         |         | 15.8    | 6.9     | -17.2   | -0.8    | -6.2    |         | 28.2    |         | 5.5     | 7.9     | -7.9    |         | 0.6     | -11.5   | -14.4   | 17.4    | 0.6     |

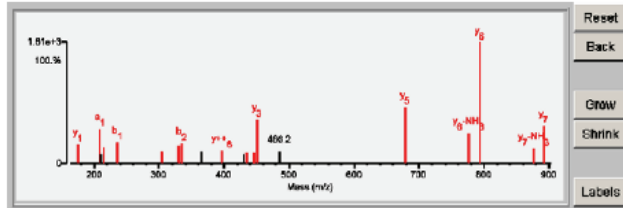

Detailed Results

| Rank | Score | SP1 (%) | BCS | # Unmatched Ions | Sequence                   | MH <sup>+</sup> Calculated (Da) | MH <sup>+</sup> Error (Da) | MH <sup>+</sup> Error (ppm) | Protein MW/pI (Da) | Species | Accession # | MS-Digest Index # | Protein Name                                        |
|------|-------|---------|-----|------------------|----------------------------|---------------------------------|----------------------------|-----------------------------|--------------------|---------|-------------|-------------------|-----------------------------------------------------|
| 1    | 15.04 | 84.1    | 9   | 6/24             | (1) WKV9R/FVK 2/I2Y/KK (I) | 1469.8344                       | 0.0225                     | 15.4                        | 13950.3/10.31      | HUMAN   | P33778      | 231181            | Histone H2B type 1-B - Homo sapiens (Human)         |
| 1    | 15.04 | 84.1    | 9   | 6/24             | (1) WKV9R/FVK 2/I2Y/KK (I) | 1469.8344                       | 0.0225                     | 15.4                        | 13819.1/10.31      | HUMAN   | P62867      | 231186            | Histone H2B type 1-C/E/F/G/I - Homo sapiens (Human) |
| 1    | 15.04 | 84.1    | 9   | 6/24             | (1) WKV9R/FVK 2/I2Y/KK (I) | 1469.8344                       | 0.0225                     | 15.4                        | 13996.2/10.31      | HUMAN   | P68876      | 231189            | Histone H2B type 1-D - Homo sapiens (Human)         |
| 1    | 15.04 | 84.1    | 9   | 6/24             | (1) WKV9R/FVK 2/I2Y/KK (I) | 1469.8344                       | 0.0225                     | 15.4                        | 13892.2/10.31      | HUMAN   | Q83078      | 231193            | Histone H2B type 1-H - Homo sapiens (Human)         |
| 1    | 15.04 | 84.1    | 9   | 6/24             | (1) WKV9R/FVK 2/I2Y/KK (I) | 1469.8344                       | 0.0225                     | 15.4                        | 13904.2/10.31      | HUMAN   | P08889      | 231197            | Histone H2B type 1-J - Homo sapiens (Human)         |
| 1    | 15.04 | 84.1    | 9   | 6/24             | (1) WKV9R/FVK 2/I2Y/KK (I) | 1469.8344                       | 0.0225                     | 15.4                        | 13890.2/10.31      | HUMAN   | Q80814      | 231201            | Histone H2B type 1-K - Homo sapiens (Human)         |
| 1    | 15.04 | 84.1    | 9   | 6/24             | (1) WKV9R/FVK 2/I2Y/KK (I) | 1469.8344                       | 0.0225                     | 15.4                        | 13952.3/10.31      | HUMAN   | Q89880      | 231207            | Histone H2B type 1-L - Homo sapiens (Human)         |
| 1    | 15.04 | 84.1    | 9   | 6/24             | (1) WKV9R/FVK 2/I2Y/KK (I) | 1469.8344                       | 0.0225                     | 15.4                        | 13989.3/10.31      | HUMAN   | Q89878      | 231209            | Histone H2B type 1-M - Homo sapiens (Human)         |
| 1    | 15.04 | 84.1    | 9   | 6/24             | (1) WKV9R/FVK 2/I2Y/KK (I) | 1469.8344                       | 0.0225                     | 15.4                        | 13922.2/10.31      | HUMAN   | Q89877      | 231216            | Histone H2B type 1-N - Homo sapiens (Human)         |
| 1    | 15.04 | 84.1    | 9   | 6/24             | (1) WKV9R/FVK 2/I2Y/KK (I) | 1469.8344                       | 0.0225                     | 15.4                        | 13906.2/10.31      | HUMAN   | P23627      | 231217            | Histone H2B type 1-O - Homo sapiens (Human)         |
| 1    | 15.04 | 84.1    | 9   | 6/24             | (1) WKV9R/FVK 2/I2Y/KK (I) | 1469.8344                       | 0.0225                     | 15.4                        | 13928.2/10.31      | HUMAN   | Q18278      | 231277            | Histone H2B type 2-E - Homo sapiens (Human)         |
| 1    | 15.04 | 84.1    | 9   | 6/24             | (1) WKV9R/FVK 2/I2Y/KK (I) | 1469.8344                       | 0.0225                     | 15.4                        | 13928.2/10.31      | HUMAN   | Q6GNW8      | 231283            | Histone H2B type 2-F - Homo sapiens (Human)         |
| 1    | 15.04 | 84.1    | 9   | 6/24             | (1) WKV9R/FVK 2/I2Y/KK (I) | 1469.8344                       | 0.0225                     | 15.4                        | 13968.2/10.31      | HUMAN   | Q8N267      | 231323            | Histone H2B type 2-B - Homo sapiens (Human)         |
| 1    | 15.04 | 84.1    | 9   | 6/24             | (1) WKV9R/FVK 2/I2Y/KK (I) | 1469.8344                       | 0.0225                     | 15.4                        | 13944.3/10.37      | HUMAN   | P67063      | 231418            | Histone H2B type F-B - Homo sapiens (Human)         |

  

| Fragment-Ion (m/z)      | 72.080 | 86.086 | 87.087 | 144.045 | 175.114 | 192.048 | 202.088 | 220.044 | 304.154 | 403.113 | 421.120 | 451.231 | 523.188 | 548.247 | 556.184 | 564.303 | 590.289 | 672.346 | 742.190 | 775.388 | 793.371 | 892.451 | 1039.520 | 1128.982 |
|-------------------------|--------|--------|--------|---------|---------|---------|---------|---------|---------|---------|---------|---------|---------|---------|---------|---------|---------|---------|---------|---------|---------|---------|----------|----------|
| Frac. Inten. (% of TIC) | 0.08   | 0.95   | 0.08   | 2.56    | 10.04   | 5.50    | 2.55    | 6.16    | 3.38    | 8.81    | 5.85    | 3.94    | 2.43    | 2.50    | 4.35    | 3.12    | 2.67    | 3.05    | 2.79    | 2.55    | 7.50    | 12.60   | 4.16     | 3.06     |
| Rel. Inten. (% of BP)   | 0.60   | 2.81   | 0.60   | 20.35   | 79.65   | 43.64   | 20.05   | 48.90   | 29.78   | 89.94   | 48.45   | 31.23   | 19.30   | 19.81   | 34.63   | 24.75   | 21.15   | 24.17   | 21.66   | 20.21   | 59.54   | 100.00  | 33.00    | 24.31    |
| Score                   | 0.50   | 0.22   | 0.33   | -0.20   | 1.53    | 0.50    | 0.75    | 0.50    | 1.50    | 0.25    | 0.50    | 1.53    | -0.19   | -0.20   | 0.25    | 1.56    | -0.21   | -0.24   | -0.22   | 0.50    | 1.56    | 1.50    | 1.50     | 1.50     |
| Ion-type                | V      | LI     | NR     | Y1      | Y1      | H1      | NS      | Y1      | Y1      | Y1      | Y1      | Y1      | Y1      | Y1      | Y1      | Y1      | Y1      | Y1      | Y1      | Y1      | Y1      | Y1      | Y1       | Y1       |
| Delta ppm               | -10.8  | -1.5   | 13.9   |         | -28.3   | -19.9   | 21.1    | -13.8   | -26.5   | 2.6     | -6.2    | 3.4     |         | 7.7     | -19.9   |         |         |         |         | 18.0    | -16.4   | -1.4    | 0.0      | 8.0      |

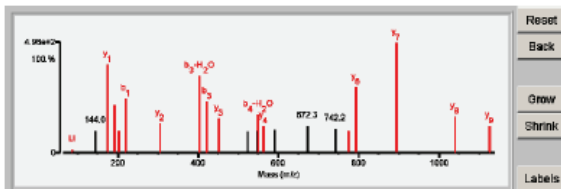

Detailed Results

| Rank | Score | SP1 (%) | BC8 | # Unmatched Ions | Sequence                                      | MH <sup>+</sup> Calculated (Da) | MH <sup>+</sup> Error (Da) | MH <sup>+</sup> Error (ppm) | Protein MW(kDa) | Species | Accession # | MS-Digest Index # | Protein Name                                       |
|------|-------|---------|-----|------------------|-----------------------------------------------|---------------------------------|----------------------------|-----------------------------|-----------------|---------|-------------|-------------------|----------------------------------------------------|
| 1    | 16.69 | 79.3    | 8   | 8/25             | (G) I L N R I S / F / T / R D I / F R / R (I) | 1672.7186                       | 0.0244                     | 15.6                        | 19850.310.31    | HUMAN   | P53778      | 231181            | Histone H2B type 1-B - Homo sapiens (Human)        |
| 1    | 16.69 | 79.3    | 8   | 8/25             | (G) I L N R I S / F / T / R D I / F R / R (I) | 1672.7186                       | 0.0244                     | 15.6                        | 19816.110.31    | HUMAN   | P62907      | 231186            | Histone H2B type 1-C/E/F/G1 - Homo sapiens (Human) |
| 1    | 16.69 | 79.3    | 8   | 8/25             | (G) I L N R I S / F / T / R D I / F R / R (I) | 1672.7186                       | 0.0244                     | 15.6                        | 19836.210.31    | HUMAN   | P56873      | 231188            | Histone H2B type 1-D - Homo sapiens (Human)        |
| 1    | 16.69 | 79.3    | 8   | 8/25             | (G) I L N R I S / F / T / R D I / F R / R (I) | 1672.7186                       | 0.0244                     | 15.6                        | 19892.210.31    | HUMAN   | G93078      | 231193            | Histone H2B type 1-H - Homo sapiens (Human)        |
| 1    | 16.69 | 79.3    | 8   | 8/25             | (G) I L N R I S / F / T / R D I / F R / R (I) | 1672.7186                       | 0.0244                     | 15.6                        | 19804.210.31    | HUMAN   | P39989      | 231197            | Histone H2B type 1-J - Homo sapiens (Human)        |
| 1    | 16.69 | 79.3    | 8   | 8/25             | (G) I L N R I S / F / T / R D I / F R / R (I) | 1672.7186                       | 0.0244                     | 15.6                        | 19880.210.31    | HUMAN   | G88614      | 231201            | Histone H2B type 1-K - Homo sapiens (Human)        |
| 1    | 16.69 | 79.3    | 8   | 8/25             | (G) I L N R I S / F / T / R D I / F R / R (I) | 1672.7186                       | 0.0244                     | 15.6                        | 19862.210.31    | HUMAN   | G98880      | 231207            | Histone H2B type 1-L - Homo sapiens (Human)        |
| 1    | 16.69 | 79.3    | 8   | 8/25             | (G) I L N R I S / F / T / R D I / F R / R (I) | 1672.7186                       | 0.0244                     | 15.6                        | 19869.310.31    | HUMAN   | G98878      | 231209            | Histone H2B type 1-M - Homo sapiens (Human)        |
| 1    | 16.69 | 79.3    | 8   | 8/25             | (G) I L N R I S / F / T / R D I / F R / R (I) | 1672.7186                       | 0.0244                     | 15.6                        | 19822.210.31    | HUMAN   | G98877      | 231216            | Histone H2B type 1-N - Homo sapiens (Human)        |
| 1    | 16.69 | 79.3    | 8   | 8/25             | (G) I L N R I S / F / T / R D I / F R / R (I) | 1672.7186                       | 0.0244                     | 15.6                        | 19808.210.31    | HUMAN   | P25627      | 231217            | Histone H2B type 1-O - Homo sapiens (Human)        |
| 1    | 16.69 | 79.3    | 8   | 8/25             | (G) I L N R I S / F / T / R D I / F R / R (I) | 1672.7186                       | 0.0244                     | 15.6                        | 19820.210.31    | HUMAN   | G16778      | 231277            | Histone H2B type 2-E - Homo sapiens (Human)        |
| 1    | 16.69 | 79.3    | 8   | 8/25             | (G) I L N R I S / F / T / R D I / F R / R (I) | 1672.7186                       | 0.0244                     | 15.6                        | 19820.210.31    | HUMAN   | G6GNW8      | 231283            | Histone H2B type 2-F - Homo sapiens (Human)        |
| 1    | 16.69 | 79.3    | 8   | 8/25             | (G) I L N R I S / F / T / R D I / F R / R (I) | 1672.7186                       | 0.0244                     | 15.6                        | 19808.210.31    | HUMAN   | G8N267      | 231323            | Histone H2B type 3-B - Homo sapiens (Human)        |
| 1    | 16.69 | 79.3    | 8   | 8/25             | (G) I L N R I S / F / T / R D I / F R / R (I) | 1672.7186                       | 0.0244                     | 15.6                        | 19844.310.37    | HUMAN   | P67063      | 231418            | Histone H2B type F-8 - Homo sapiens (Human)        |

  

| Fragment-Ion (m/z)      | 72.081 | 86.095 | 104.061 | 174.098 | 176.119 | 202.080 | 248.088 | 317.107 | 333.128 | 447.187 | 461.229 | 468.209 <sup>2</sup> | 604.229 <sup>2</sup> | 618.200 | 662.249 | 683.288 | 678.322 | 688.319 | 776.399 | 795.397 | 892.451 | 1008.459 | 1099.508 | 1128.540 | 1240.620 |
|-------------------------|--------|--------|---------|---------|---------|---------|---------|---------|---------|---------|---------|----------------------|----------------------|---------|---------|---------|---------|---------|---------|---------|---------|----------|----------|----------|----------|
| Frag. Inten. (% of TIC) | 0.15   | 0.28   | 7.39    | 2.95    | 3.10    | 2.99    | 8.60    | 3.10    | 2.72    | 2.36    | 4.62    | 3.50                 | 2.85                 | 3.95    | 2.50    | 5.25    | 8.05    | 3.48    | 2.70    | 8.92    | 9.73    | 2.65     | 4.87     | 4.55     | 3.26     |
| Rel. Inten. (% of BP)   | 1.52   | 3.91   | 75.99   | 30.28   | 31.88   | 33.73   | 87.65   | 31.83   | 27.86   | 24.27   | 47.48   | 25.72                | 25.27                | 40.81   | 25.75   | 63.89   | 82.81   | 36.62   | 27.74   | 91.71   | 100.00  | 27.33    | 48.06    | 45.78    | 33.81    |
| Score                   | 0.50   | 0.22   | -0.76   | 0.50    | 1.50    | 0.75    | 0.75    | -0.32   | 3.10    | 0.50    | 1.50    | -0.26                | -0.26                | 0.25    | 0.25    | 0.75    | 1.50    | 0.50    | 0.50    | 1.50    | 1.50    | -0.27    | 1.50     | 1.50     | 1.50     |
| Ion-type                | V      | LI     | LI      | a1      | y1      | N8      | MN      | b1      | b2      | b3      | y3      | b4-H2O               | b5-H2O               | 8FVNDI  | y**11   | y5-H2O  | y6      | y7      | y8      | y9      | y10     |          |          |          |          |
| Delta ppm               | -3.6   | -15.4  |         | -38.5   | 0.3     | -15.5   | -21.9   | -15.9   | 6.3     | -15.6   | -13.0   | 7.5                  |                      |         | 3.3     | -13.1   | -3.2    | 29.4    | -20.7   | -1.9    |         |          | -13.9    | -8.6     | -12.3    |

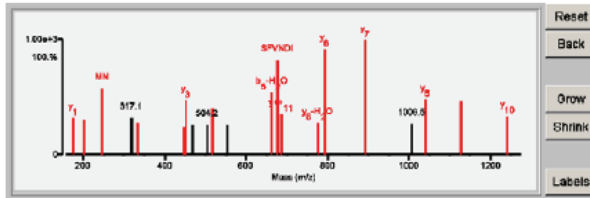

Detailed Results

| Rank | Score | SP1 (%) | BC8 | # Unmatched Ions | Sequence                                            | MH <sup>+</sup> Calculated (Da) | MH <sup>+</sup> Error (Da) | MH <sup>+</sup> Error (ppm) | Protein MW(kDa) | Species | Accession # | MS-Digest Index # | Protein Name                      |
|------|-------|---------|-----|------------------|-----------------------------------------------------|---------------------------------|----------------------------|-----------------------------|-----------------|---------|-------------|-------------------|-----------------------------------|
| 1    | 10.88 | 79.0    | 7   | 11/25            | (R) I I I G / G / L I I I / X / R / E / E E E E (G) | 1288.8191                       | 0.0008                     | 0.6                         | 11367.4/11.98   | HUMAN   | P62806      | 232065            | Histone H4 - Homo sapiens (Human) |

  

| Fragment-Ion (m/z)      | 70.098 | 72.080 | 86.098 | 84.098 | 121.078 | 174.092 | 202.081 | 230.148 | 271.108 | 308.188 | 328.132 | 342.141 | 348.148 | 348.224 | 406.204 | 450.195 | 468.228 | 634.254 | 651.825 | 697.318 | 728.453 | 810.398 | 810.398 | 880.489 | 1087.628 |
|-------------------------|--------|--------|--------|--------|---------|---------|---------|---------|---------|---------|---------|---------|---------|---------|---------|---------|---------|---------|---------|---------|---------|---------|---------|---------|----------|
| Frag. Inten. (% of TIC) | 0.00   | 1.88   | 0.23   | 2.37   | 1.55    | 4.91    | 4.88    | 1.54    | 1.98    | 1.91    | 14.14   | 1.73    | 4.85    | 1.53    | 2.00    | 2.53    | 6.48    | 2.82    | 1.83    | 20.10   | 2.18    | 11.49   | 1.84    | 1.79    | 3.35     |
| Rel. Inten. (% of BP)   | 0.01   | 9.33   | 1.12   | 11.78  | 7.71    | 24.43   | 24.26   | 7.57    | 9.86    | 9.50    | 70.32   | 8.60    | 24.15   | 7.62    | 9.95    | 13.09   | 32.25   | 14.01   | 9.11    | 100.00  | 10.83   | 57.16   | 9.13    | 8.92    | 16.66    |
| Score                   | 0.20   | -0.09  | 0.22   | -0.12  | -0.08   | 0.50    | 0.50    | -0.08   | 0.25    | -0.10   | 0.25    | -0.09   | 0.50    | -0.08   | 1.50    | -0.13   | 0.50    | 1.50    | -0.09   | 1.50    | -0.11   | 1.50    | -0.09   | 1.50    | 1.50     |
| Ion-type                | PR     | LI     | LI     |        | a1      | b1      | b2-H2O  | b3      | b3-H2O  | b4      | b4      | b5      | b5      | b5      | y3      | y3      | y4      | y4      | y5      | y6      | y6      | y8      | y8      | y9      | y9       |
| Delta ppm               | 8.2    |        | 17.1   |        | -20.7   | -0.6    | -12.5   | -3.8    |         | 15.3    |         |         |         | -12.4   |         | -1.3    | 3.7     | 3.8     |         |         | -3.8    |         | -16.5   | -10.4   |          |

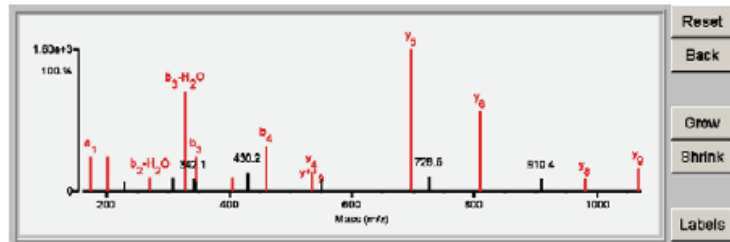



Detailed Results

| Rank | Score | SP1 (%) | BC3 | # Unmatched Ions | Sequence                            | MH <sup>+</sup> Calculated (Da) | MH <sup>+</sup> Error (Da) | MH <sup>+</sup> Error (ppm) | Protein MW/pi (Da) | Species | Accession # | MS-Digest Index # | Protein Name                      |
|------|-------|---------|-----|------------------|-------------------------------------|---------------------------------|----------------------------|-----------------------------|--------------------|---------|-------------|-------------------|-----------------------------------|
| 1    | 14.87 | 83.0    | 8   | 8/25             | (R) D/V/L/I/Q/G/I/I/T/K/P A I/R (R) | 1648.7881                       | 0.0018                     | 1.2                         | 11387.4/11.38      | HUMAN   | P82806      | 232083            | Histone H4 - Homo sapiens (Human) |

  

| Fragment-Ion (m/z)      | 88.087 | 87.066 | 176.120 | 204.033 | 300.062 | 318.078 | 387.113 | 385.152 | 405.184 | 431.181 | 458.283 | 558.812*2 | 618.240 | 828.338 | 718.403 | 727.391 | 729.324 | 820.448 | 856.638 | 887.486 | 933.633 | 983.593 | 990.557 | 1025.658 | 1118.811 |
|-------------------------|--------|--------|---------|---------|---------|---------|---------|---------|---------|---------|---------|-----------|---------|---------|---------|---------|---------|---------|---------|---------|---------|---------|---------|----------|----------|
| Frag. Inten. (% of TIC) | 0.10   | 0.05   | 1.87    | 1.43    | 2.03    | 11.32   | 1.21    | 1.67    | 5.59    | 8.78    | 15.02   | 1.44      | 8.40    | 1.48    | 2.41    | 3.29    | 3.79    | 7.61    | 1.64    | 3.61    | 1.48    | 1.50    | 7.04    | 2.63     | 4.62     |
| Rel. Inten. (% of BP)   | 0.55   | 0.31   | 12.48   | 9.52    | 13.51   | 75.32   | 8.04    | 11.10   | 37.20   | 58.45   | 100.00  | 9.55      | 55.91   | 9.82    | 16.02   | 21.91   | 25.24   | 50.67   | 10.95   | 24.00   | 9.84    | 9.98    | 46.88   | 17.51    | 30.74    |
| Score                   | 0.22   | 0.33   | 1.50    | 0.50    | 0.25    | 0.50    | -0.08   | -0.11   | 0.50    | 0.50    | 1.50    | 1.50      | 0.50    | -0.10   | 1.50    | -0.22   | 0.50    | 1.50    | -0.11   | -0.24   | 1.50    | -0.10   | 1.50    | -0.18    | 1.50     |
| Ion-type                | LI     | NR     | Y1      | b1      | b2-H2O  | b2      | a3      | b3      | a4      | b4      | Y5+2    | b5        | Y6      | Y6      | Y6      | Y6      | b6      | Y6      | Y6      | Y6      | Y6      | Y6      | Y6      | Y6       | Y6       |
| Delta ppm               | 6.7    | -2.2   | 7.7     | -3.4    | -13.2   | -0.4    |         |         | -3.9    | 0.0     | 0.9     | 1.8       | -0.7    |         | 1.8     |         | -1.5    | -1.3    |         |         | -1.0    |         | 2.0     | -2.6     |          |

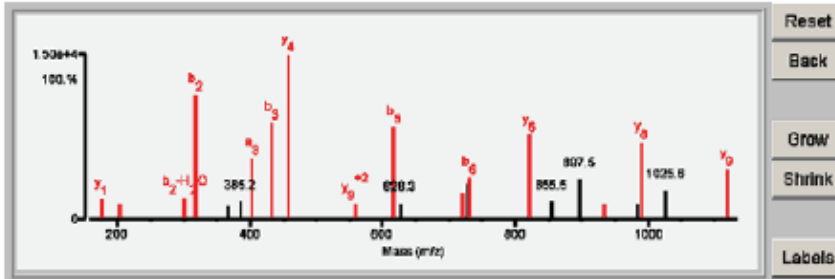

Detailed Results

| Rank | Score | SP1 (%) | BC3 | # Unmatched Ions | Sequence                | MH <sup>+</sup> Calculated (Da) | MH <sup>+</sup> Error (Da) | MH <sup>+</sup> Error (ppm) | Protein MW/pi (Da) | Species | Accession # | MS-Digest Index # | Protein Name                                          |
|------|-------|---------|-----|------------------|-------------------------|---------------------------------|----------------------------|-----------------------------|--------------------|---------|-------------|-------------------|-------------------------------------------------------|
| 1    | 18.86 | 88.8    | 8   | 8/25             | (G) L/I/I/I/E/E/E/R (R) | 1011.4818                       | 0.0018                     | 1.6                         | 11009.2/11.08      | HUMAN   | G98626      | 231878            | Histone H4-like protein type G - Homo sapiens (Human) |
| 1    | 18.86 | 88.8    | 8   | 8/25             | (G) L/I/I/I/E/E/E/R (G) | 1011.4818                       | 0.0018                     | 1.6                         | 11387.4/11.38      | HUMAN   | P82806      | 232083            | Histone H4 - Homo sapiens (Human)                     |

  

| Fragment-Ion (m/z)      | 88.087 | 87.100 | 84.088 | 100.048 | 136.074 | 158.088 | 174.084 | 175.118 | 202.080 | 248.168 | 251.071 | 278.186 | 277.185 | 293.116 | 316.176 | 328.274 | 348.174 | 406.207 | 406.713 | 478.223 | 518.238 | 534.263 | 616.208 | 887.318 | 810.402 |
|-------------------------|--------|--------|--------|---------|---------|---------|---------|---------|---------|---------|---------|---------|---------|---------|---------|---------|---------|---------|---------|---------|---------|---------|---------|---------|---------|
| Frag. Inten. (% of TIC) | 1.11   | 1.53   | 1.23   | 1.35    | 0.30    | 1.21    | 4.91    | 2.04    | 1.36    | 4.73    | 1.11    | 3.71    | 1.58    | 1.31    | 5.47    | 1.30    | 1.32    | 7.90    | 1.60    | 1.32    | 2.32    | 19.01   | 1.09    | 27.28   | 3.89    |
| Rel. Inten. (% of BP)   | 4.05   | 5.61   | 4.50   | 4.93    | 1.10    | 4.43    | 18.01   | 7.49    | 5.00    | 17.35   | 4.08    | 13.60   | 5.78    | 4.81    | 20.03   | 4.76    | 4.85    | 28.96   | 5.86    | 4.85    | 8.51    | 69.69   | 4.01    | 100.00  | 14.25   |
| Score                   | 0.22   | -0.06  | -0.05  | -0.05   | 1.00    | -0.04   | 0.50    | 1.50    | -0.05   | 0.50    | -0.04   | 1.50    | 0.75    | 0.50    | 0.50    | -0.05   | 1.50    | 1.50    | 1.50    | 0.50    | 0.50    | 1.50    | -0.04   | 1.50    | 1.50    |
| Ion-type                | LI     | Y      | Y      | Y       | Y       | a1      | Y1      | Y2      | Y2      | Y2      | Y2      | Y2      | Y2      | Y2      | Y2      | Y2      | Y2      | Y2      | Y2      | Y2      | Y2      | Y2      | Y2      | Y2      | Y2      |
| Delta ppm               |        |        |        |         |         | -11.0   |         | -11.0   | -4.3    |         |         | -7.4    | 33.7    | 1.0     | 1.0     |         | 36.6    | -4.5    | 24.0    | -32.0   | -10.4   | 1.3     |         | 3.4     | 3.6     |

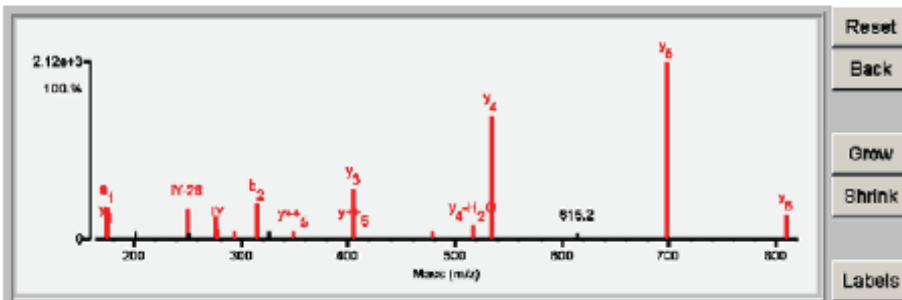

Detailed Results

| Rank | Score | SPI (%) | BCS | # Unmatched Ions | Sequence                                  | MH <sup>+</sup> Calculated (Da) | MH <sup>+</sup> Error (Da) | MH <sup>+</sup> Error (ppm) | Protein MW/Pl (Da) | Species | Accession #      | MS-Digest Index #                                                                                               | Protein Name |
|------|-------|---------|-----|------------------|-------------------------------------------|---------------------------------|----------------------------|-----------------------------|--------------------|---------|------------------|-----------------------------------------------------------------------------------------------------------------|--------------|
| 1    | 10.70 | 66.5    | 6   | 9/25             | (R) L A V P S G V I A I L V Q / D / R (V) | 1450.7471                       | 0.0072                     | 5.0                         | 17887.6/6.83       | HUMAN   | P05161<br>678667 | Interferon-induced 17 kDa protein precursor [Contains: Ubiquitin cross-reactive protein - Homo sapiens (Human)] |              |

  

| Fragment-ion (m/z)      | 70.066 | 72.080 | 86.097 | 101.074 | 110.072 | 175.117 | 237.130 | 290.150 | 308.167 | 348.132 <sup>+2</sup> | 401.176 | 411.221 | 418.206 | 421.254 | 521.862 | 531.289 | 584.278 <sup>+2</sup> | 602.325 | 633.792 | 637.300 | 669.355 <sup>+2</sup> | 750.357 | 849.424 | 920.463 | 1030.492 |
|-------------------------|--------|--------|--------|---------|---------|---------|---------|---------|---------|-----------------------|---------|---------|---------|---------|---------|---------|-----------------------|---------|---------|---------|-----------------------|---------|---------|---------|----------|
| Frac. Inten. (% of TIC) | 0.00   | 0.52   | 0.83   | 0.08    | 0.74    | 12.23   | 4.22    | 3.04    | 2.75    | 2.98                  | 8.73    | 3.27    | 7.32    | 3.31    | 2.99    | 12.32   | 2.84                  | 2.84    | 3.33    | 3.28    | 5.82                  | 3.93    | 2.76    | 4.15    | 5.74     |
| Rel. Inten. (% of BP)   | 0.03   | 4.24   | 6.74   | 0.67    | 6.02    | 99.23   | 34.24   | 24.83   | 22.34   | 24.05                 | 70.82   | 26.53   | 59.40   | 26.80   | 24.27   | 100.00  | 23.04                 | 23.05   | 27.03   | 26.42   | 47.26                 | 31.91   | 22.40   | 33.68   | 46.59    |
| Score                   | 0.20   | 0.50   | 0.22   | 0.50    | 1.00    | 1.50    | 0.75    | 1.50    | 0.75    | -0.24                 | 0.50    | -0.27   | 1.50    | -0.27   | 1.50    | 1.50    | -0.23                 | 23.05   | 27.03   | -0.26   | -0.47                 | 0.50    | 0.50    | 0.50    | -0.47    |
| Ion-type                | PR     | V      | LI     | QK      | H       | y1      | VH      | y2      | AVH     |                       | y3-NH3  |         | y3      |         | y4      |         |                       |         |         |         |                       | b7      | b8      | b9      |          |
| Delta ppm               | 13.9   | -14.9  | 3.2    | 26.3    | 2.1     | -8.9    | -24.9   | 15.5    | -19.8   |                       | -3.8    |         | 3.4     |         | 0.9     |         |                       | -0.6    |         |         |                       | -5.2    | -6.5    | -3.7    |          |

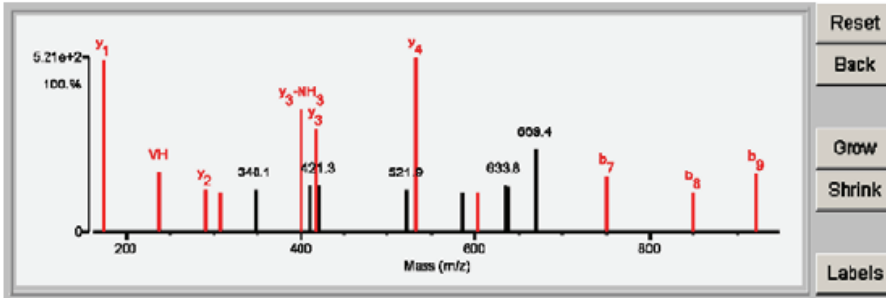

Reset  
Back  
Grow  
Shrink  
Labels

Detailed Results

| Rank | Score | SPI (%) | BCS | # Unmatched Ions | Sequence                                                          | MH <sup>+</sup> Calculated (Da) | MH <sup>+</sup> Error (Da) | MH <sup>+</sup> Error (ppm) | Protein MW/Pl (Da) | Species | Accession #      | MS-Digest Index #                                                           | Protein Name |
|------|-------|---------|-----|------------------|-------------------------------------------------------------------|---------------------------------|----------------------------|-----------------------------|--------------------|---------|------------------|-----------------------------------------------------------------------------|--------------|
| 1    | 16.47 | 74.3    | 7   | 7/25             | (R) V T G N F K H A S P I L I P I / T / S / F / S D I / P / R (R) | 2662.3156                       | 0.0046                     | 1.7                         | 50670.5/9.39       | HUMAN   | P42167<br>297721 | Lamina-associated polypeptide 2, isoforms beta/gamma - Homo sapiens (Human) |              |

  

| Fragment-ion (m/z)      | 70.067 | 72.081 | 84.046 | 86.097 | 101.070 | 120.084 | 175.120 | 183.147 | 201.108 | 211.140 | 272.168 | 587.296 | 587.811 | 627.790 <sup>-2</sup> | 674.326 <sup>-2</sup> | 734.370 | 744.856 <sup>-2</sup> | 802.569 <sup>+3</sup> | 803.890 <sup>+2</sup> | 863.421 | 868.207 | 964.475 | 999.484 | 1170.095 <sup>-2</sup> | 1174.605 |
|-------------------------|--------|--------|--------|--------|---------|---------|---------|---------|---------|---------|---------|---------|---------|-----------------------|-----------------------|---------|-----------------------|-----------------------|-----------------------|---------|---------|---------|---------|------------------------|----------|
| Frac. Inten. (% of TIC) | 0.01   | 0.17   | 0.09   | 0.33   | 0.10    | 0.14    | 4.90    | 6.89    | 3.05    | 4.48    | 2.94    | 7.01    | 8.91    | 6.79                  | 3.39                  | 3.97    | 2.99                  | 3.05                  | 3.75                  | 2.98    | 3.04    | 3.59    | 2.94    | 3.08                   | 21.40    |
| Rel. Inten. (% of BP)   | 0.04   | 0.81   | 0.43   | 1.53   | 0.45    | 0.67    | 22.88   | 32.20   | 14.27   | 20.95   | 13.76   | 32.73   | 41.83   | 31.73                 | 15.84                 | 18.57   | 13.96                 | 14.24                 | 17.52                 | 13.94   | 14.22   | 16.78   | 13.73   | 14.41                  | 100.00   |
| Score                   | 0.20   | 0.50   | 1.00   | 0.22   | 0.50    | 1.00    | 1.50    | 0.50    | -0.14   | 0.75    | 1.50    | 1.50    | 1.50    | -0.32                 | 0.50                  | 1.50    | 0.50                  | -0.14                 | -0.18                 | 1.50    | -0.14   | 1.50    | -0.14   | -0.14                  | 1.50     |
| Ion-type                | PR     | V      | E      | LI     | QK      | F       | y1      | IP-28   |         | IP      | y2      | y5      | y++10   |                       | a1 <sup>-2</sup>      | y6      | b12 <sup>+2</sup>     |                       |                       | y7      |         | y8      | y9      | y10                    |          |
| Delta ppm               | 23.9   | 0.3    | 13.2   | 9.0    | -14.2   | 26.9    | 6.0     | -20.1   |         | -23.2   | -13.7   | -31.2   | 3.8     |                       | 7.1                   | -17.7   | -6.7                  |                       |                       | -5.3    |         | 1.6     |         |                        | -4.7     |

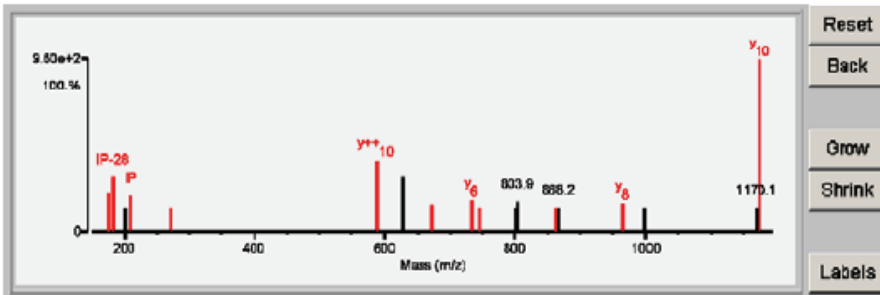

Reset  
Back  
Grow  
Shrink  
Labels

173

Detailed Results

| Rank                    | Score  | SPI (%) | # BCS Unmatched Ions | Sequence                               | MH <sup>+</sup> Calculated (Da) | MH <sup>+</sup> Error (Da) | MH <sup>+</sup> Error (ppm) | Protein MW/pi (Da) | Species | Accession #            | MS-Digest Index #      | Protein Name                                                                |         |         |         |                       |                       |         |                       |                       |         |         |          |          |          |
|-------------------------|--------|---------|----------------------|----------------------------------------|---------------------------------|----------------------------|-----------------------------|--------------------|---------|------------------------|------------------------|-----------------------------------------------------------------------------|---------|---------|---------|-----------------------|-----------------------|---------|-----------------------|-----------------------|---------|---------|----------|----------|----------|
| 1                       | 23.38  | 98.1    | 11                   | (H)A/R/P/L/L/P/L/P/R/R/R # D/L/P/R (R) | 1743.8986                       | -0.0107                    | -6.1                        | 50670.59.59        | HUMAN   | <a href="#">P42167</a> | <a href="#">297721</a> | Lamins-associated polypeptide 2, isoforms beta/gamma - Homo sapiens (Human) |         |         |         |                       |                       |         |                       |                       |         |         |          |          |          |
| Fragment-Ion (m/z)      | 86.096 | 175.118 | 183.149              | 211.142                                | 272.169                         | 273.170                    | 324.225                     | 328.112            | 344.125 | 385.258                | 411.259                | 429.211                                                                     | 439.199 | 457.208 | 570.293 | 587.305 <sup>+2</sup> | 644.350 <sup>+2</sup> | 734.384 | 749.414 <sup>+2</sup> | 792.520 <sup>+2</sup> | 807.380 | 964.467 | 1077.543 | 1174.600 | 1287.681 |
| Frac. Inten. (% of TIC) | 0.04   | 0.97    | 2.33                 | 2.29                                   | 4.95                            | 0.94                       | 2.85                        | 4.08               | 5.58    | 1.02                   | 1.17                   | 3.22                                                                        | 0.90    | 18.29   | 5.71    | 4.77                  | 3.19                  | 1.18    | 8.74                  | 2.28                  | 0.90    | 1.88    | 0.95     | 21.65    | 2.98     |
| Rel. Inten. (% of BP)   | 0.18   | 4.47    | 10.78                | 10.30                                  | 21.47                           | 4.34                       | 13.15                       | 18.73              | 25.88   | 4.73                   | 5.39                   | 14.85                                                                       | 4.50    | 75.25   | 26.37   | 22.04                 | 14.74                 | 5.38    | 40.38                 | 10.45                 | 4.58    | 8.88    | 4.37     | 100.00   | 10.98    |
| Score                   | 0.22   | 1.50    | 0.50                 | 0.75                                   | 1.50                            | -0.04                      | 0.75                        | 0.25               | 0.50    | 1.50                   | 0.75                   | 0.50                                                                        | 0.25    | 0.50    | 0.50    | 1.50                  | 1.50                  | 1.50    | 1.50                  | 1.50                  | -0.05   | 1.50    | 1.50     | 1.50     | 1.50     |
| Ion-type                | LI     | y1      | IP-28                | IP                                     | y2                              |                            | LPI                         | b3-H2O             | b3      | y3                     | SPIL                   | a4                                                                          | b4-H2O  | b4      | b5      | y10 <sup>+2</sup>     | y11 <sup>+2</sup>     | 1.50    | y13                   | y14 <sup>+2</sup>     |         | y8      | y9       | y10      | y11      |
| Delta ppm               | -1.5   | -6.6    | -7.8                 | -13.3                                  | -10.7                           |                            | -13.8                       | -18.7              | -9.8    | 6.8                    | -8.1                   | -15.6                                                                       | -8.1    | -9.9    | -8.8    | -8.1                  | -1.9                  | 1.4     | -7.0                  | -18.8                 |         | -6.8    | -13.3    | -8.7     | -26.3    |

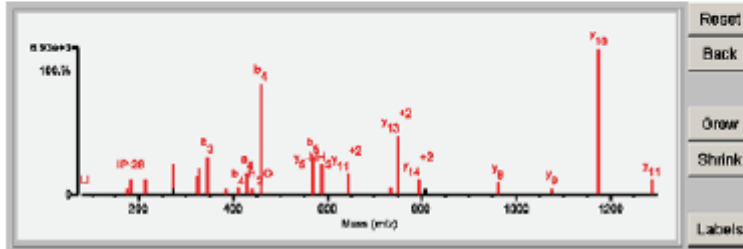

174

Detailed Results

| Rank                    | Score  | SPI (%) | # BCS Unmatched Ions | Sequence                              | MH <sup>+</sup> Calculated (Da) | MH <sup>+</sup> Error (Da) | MH <sup>+</sup> Error (ppm) | Protein MW/pi (Da) | Species | Accession #            | MS-Digest Index #      | Protein Name                                                         |         |         |          |         |         |         |                       |         |                       |         |                       |          |          |
|-------------------------|--------|---------|----------------------|---------------------------------------|---------------------------------|----------------------------|-----------------------------|--------------------|---------|------------------------|------------------------|----------------------------------------------------------------------|---------|---------|----------|---------|---------|---------|-----------------------|---------|-----------------------|---------|-----------------------|----------|----------|
| 1                       | 10.05  | 57.7    | 4                    | (A)HDPFRDLPDREGRQHCCKLILP/GVADI/R (A) | 2990.5062                       | -0.0073                    | -2.4                        | 71190.5%6.94       | HUMAN   | <a href="#">Q8NA19</a> | <a href="#">309427</a> | Lethal(3)malignant brain tumor-like 4 protein - Homo sapiens (Human) |         |         |          |         |         |         |                       |         |                       |         |                       |          |          |
| Fragment-Ion (m/z)      | 70.065 | 72.081  | 86.097               | 101.074                               | 110.071                         | 120.078                    | 175.117                     | 269.123            | 340.167 | 364.203 <sup>+2</sup>  | 382.211                | 400.218                                                              | 501.312 | 513.302 | 534.238  | 630.350 | 689.364 | 727.405 | 729.408 <sup>+2</sup> | 840.475 | 850.955 <sup>+2</sup> | 861.363 | 907.474 <sup>+2</sup> | 1076.017 | 1087.533 |
| Frac. Inten. (% of TIC) | 0.01   | 0.11    | 0.70                 | 0.10                                  | 0.14                            | 0.25                       | 2.85                        | 2.83               | 2.59    | 16.07                  | 3.92                   | 2.59                                                                 | 4.58    | 3.37    | 5.68     | 5.44    | 3.50    | 17.83   | 2.97                  | 2.99    | 8.39                  | 2.83    | 4.48                  | 2.74     | 3.05     |
| Rel. Inten. (% of BP)   | 0.04   | 0.61    | 3.90                 | 0.57                                  | 0.79                            | 1.39                       | 15.95                       | 15.89              | 14.55   | 90.16                  | 21.99                  | 14.53                                                                | 25.68   | 18.92   | 31.84    | 30.53   | 19.63   | 100.00  | 16.68                 | 16.75   | 47.05                 | 15.87   | 25.16                 | 15.37    | 17.09    |
| Score                   | 0.20   | 0.50    | 0.22                 | 0.50                                  | 1.00                            | 1.00                       | 1.50                        | 0.50               | -0.15   | 1.50                   | -0.22                  | -0.15                                                                | -0.26   | -0.19   | 0.50     | 1.50    | -0.20   | 1.50    | -0.17                 | 1.50    | -0.47                 | -0.16   | -0.25                 | 0.50     | -0.17    |
| Ion-type                | PR     | V       | LI                   | QK                                    | H                               | F                          | y1                          | RE-NH3             |         | y7 <sup>+2</sup>       |                        |                                                                      |         |         | REQH-NH3 | y6      |         | y7      |                       | y8      |                       |         |                       | b++16    |          |
| Delta ppm               | -0.4   | 0.3     | 12.5                 | 28.3                                  | -7.0                            | -26.4                      | -14.0                       | -8.3               |         | -15.9                  |                        |                                                                      |         |         | -8.6     | -11.2   |         | -6.5    |                       | -22.0   |                       |         |                       | 2.9      |          |

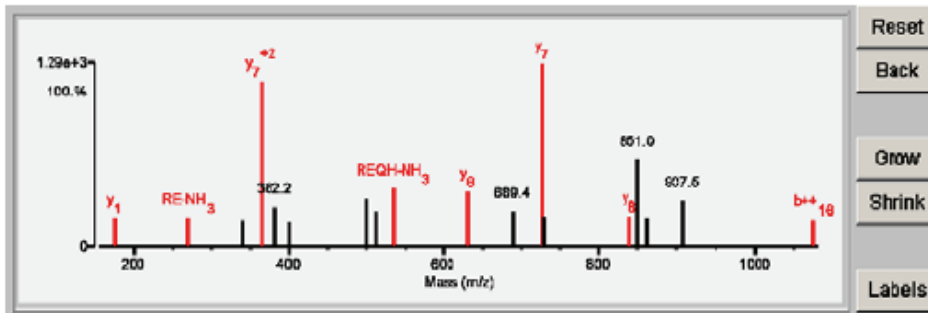

175

Detailed Results

| Rank | Score | SPI (%) | BCS | # Unmatched Ions | Sequence                            | MH <sup>+</sup> Calculated (Da) | MH <sup>+</sup> Error (Da) | MH <sup>+</sup> Error (ppm) | Protein MW/pI (Da) | Species | Accession #            | MS-Digest Index #      | Protein Name                                                     |
|------|-------|---------|-----|------------------|-------------------------------------|---------------------------------|----------------------------|-----------------------------|--------------------|---------|------------------------|------------------------|------------------------------------------------------------------|
| 1    | 10.07 | 72.0    | 5   | 10/25            | (R) V L R V S E N P V P L T V R (V) | 1647.8887                       | 0.0023                     | 1.4                         | 63473.318.55       | HUMAN   | <a href="#">Q8N1G4</a> | <a href="#">314653</a> | Leucine-rich repeat-containing protein 47 - Homo sapiens (Human) |

  

| Fragment-Ion (m/z)      | 70.065 | 72.080 | 84.047 | 84.080 | 86.097 | 87.053 | 94.065 | 110.070 | 129.100 | 169.133 | 175.116 | 201.121 | 350.216 | 375.236 | 426.184 | 449.278 | 482.727 | 483.235 | 496.264 <sup>+2</sup> | 568.349 | 585.368 | 620.292 | 634.291 <sup>+2</sup> | 822.372 | 867.403 |
|-------------------------|--------|--------|--------|--------|--------|--------|--------|---------|---------|---------|---------|---------|---------|---------|---------|---------|---------|---------|-----------------------|---------|---------|---------|-----------------------|---------|---------|
| Frac. Inten. (% of TIC) | 0.04   | 0.16   | 0.07   | 2.92   | 0.27   | 0.06   | 2.73   | 0.19    | 0.06    | 5.34    | 6.17    | 2.50    | 5.64    | 3.26    | 2.93    | 2.94    | 2.52    | 1.95    | 2.03                  | 3.82    | 31.69   | 2.48    | 2.37                  | 2.29    | 15.58   |
| Rel. Inten. (% of BP)   | 0.12   | 0.49   | 0.21   | 9.20   | 0.85   | 0.19   | 8.61   | 0.61    | 0.19    | 16.86   | 19.46   | 7.88    | 17.80   | 10.30   | 9.25    | 9.27    | 7.94    | 6.15    | 6.39                  | 12.07   | 100.00  | 7.82    | 7.47                  | 7.23    | 49.16   |
| Score                   | 0.20   | 0.50   | 1.00   | -0.09  | 0.22   | 0.33   | -0.09  | 1.00    | 0.20    | -0.17   | 1.50    | 0.75    | 1.50    | 1.50    | -0.09   | -0.09   | 0.50    | -0.08   | -0.08                 | 0.50    | 1.50    | -0.08   | -0.07                 | -0.07   | 0.50    |
| Ion-type                | PR     | V      | E      |        | LI     | NR     |        | H       | RKQ     |         | y1      | TV      | LHV     | y3      |         | b++8    |         |         |                       | y5-NH3  | y5      |         |                       |         | b7      |
| Delta ppm               | -3.2   | -10.8  | 35.8   |        | 11.3   | -24.0  |        | -9.8    | -20.4   |         | -16.9   | -17.2   | -11.6   | 2.8     |         |         | -11.2   |         |                       | 6.3     | -6.6    |         |                       |         | -1.4    |

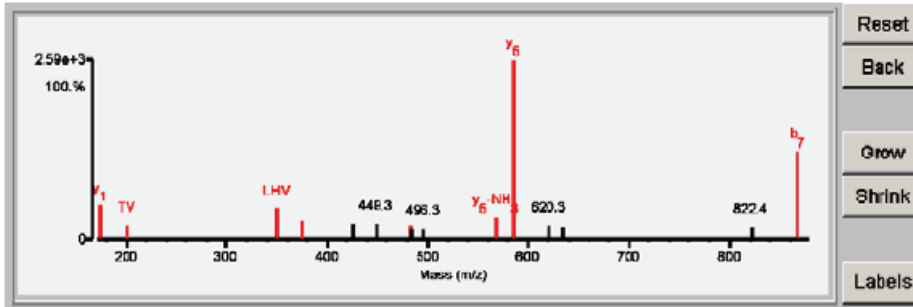

176

Detailed Results

| Rank | Score | SPI (%) | BCS | # Unmatched Ions | Sequence                   | MH <sup>+</sup> Calculated (Da) | MH <sup>+</sup> Error (Da) | MH <sup>+</sup> Error (ppm) | Protein MW/pI (Da) | Species | Accession #            | MS-Digest Index #      | Protein Name                                                 |
|------|-------|---------|-----|------------------|----------------------------|---------------------------------|----------------------------|-----------------------------|--------------------|---------|------------------------|------------------------|--------------------------------------------------------------|
| 1    | 21.38 | 96.1    | 10  | 9/26             | (8) PVAILTITLIR/NR/ILR (A) | 1380.8840                       | 0.0001                     | 0.1                         | 113744.718.84      | HUMAN   | <a href="#">Q00764</a> | <a href="#">319636</a> | Lysosomal alpha-mannosidase precursor - Homo sapiens (Human) |

  

| Fragment-Ion (m/z)      | 88.088 | 168.088 | 176.120 | 188.068 | 216.138 | 251.081 | 257.085 | 268.087 | 288.201 | 342.181 | 370.181 | 426.258 | 463.214 | 471.228          | 608.288 <sup>+2</sup> | 664.298          | 682.807 <sup>+2</sup> | 688.308 | 688.350 | 700.376 | 787.388 | 816.388 | 810.478 | 1011.617 | 1124.688 |
|-------------------------|--------|---------|---------|---------|---------|---------|---------|---------|---------|---------|---------|---------|---------|------------------|-----------------------|------------------|-----------------------|---------|---------|---------|---------|---------|---------|----------|----------|
| Frac. Inten. (% of TIC) | 0.09   | 2.30    | 2.83    | 7.13    | 1.46    | 1.68    | 14.07   | 1.79    | 2.19    | 1.97    | 5.15    | 1.92    | 4.95    | 4.96             | 2.92                  | 1.36             | 4.92                  | 3.73    | 3.18    | 1.45    | 7.61    | 1.40    | 7.82    | 11.54    | 1.70     |
| Rel. Inten. (% of BP)   | 0.62   | 16.35   | 20.09   | 50.67   | 10.34   | 11.82   | 100.00  | 12.72   | 15.68   | 13.99   | 35.60   | 13.66   | 35.15   | 35.28            | 20.01                 | 9.67             | 34.94                 | 26.53   | 22.59   | 10.31   | 54.08   | 9.95    | 55.61   | 82.01    | 12.06    |
| Score                   | 0.22   | 0.50    | 1.50    | 0.50    | 0.75    | -0.12   | 0.50    | -0.13   | 1.50    | 0.50    | 0.50    | 1.50    | 0.25    | 0.50             | 1.50                  | 1.50             | 1.50                  | 0.25    | 1.50    | 0.75    | 1.50    | -0.10   | 1.50    | 1.50     | 1.50     |
| Ion-type                | LI     | a1      | y1      | b1      | T1      |         | b2      | y2      | a3      | b3      | y3      | b4-H2O  | b4      | y5 <sup>-2</sup> | y4                    | y5 <sup>-2</sup> | b5-H2O                | y5      | LTIENE  | y6      |         | y7      | y6      | y5       |          |
| Delta ppm               | 18.3   | -12.1   | -4.3    | -9.3    | -7.5    |         | -6.8    | -8.0    | -14.9   | 1.6     | -13.2   | -9.3    | 0.0     | 9.2              | -10.0                 | 0.8              | 2.0                   | 4.0     | 32.1    | -1.1    |         | 2.3     | -5.1    | -16.0    |          |

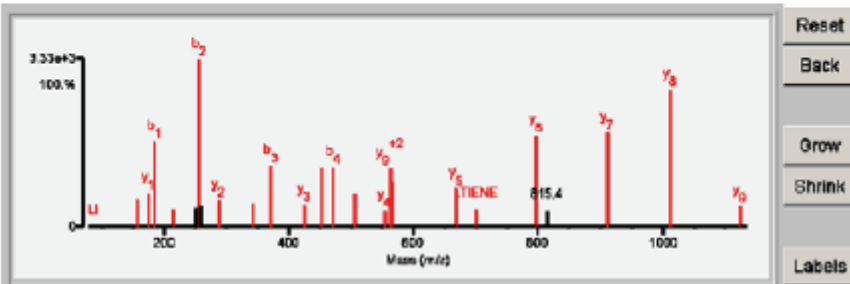

177

Detailed Results

| Rank | Score | SP1 (%) | BCS | # Unmatched ions | Sequence                                      | MH <sup>+</sup> Calculated (Da) | MH <sup>+</sup> Error (Da) | MH <sup>+</sup> Error (ppm) | Protein MW/pi (Da) | Species | Accession #      | M3-Digest Index # | Protein Name                                                                                                             |
|------|-------|---------|-----|------------------|-----------------------------------------------|---------------------------------|----------------------------|-----------------------------|--------------------|---------|------------------|-------------------|--------------------------------------------------------------------------------------------------------------------------|
| 1    | 12.88 | 83.3    | 7   | 8/25             | (E) I V L L I A I D I V I I D H / D F Y R (L) | 1603.7785                       | -0.0083                    | -4.0                        | 47078.6/8.94       | HUMAN   | P22234<br>450836 |                   | Multifunctional protein ACE2 [includes: Phosphoribosylaminoimidazole-succinocarboxamide synthase - Homo sapiens (Human)] |

  

| Fragment-Ion (m/z)      | 72.082 | 88.088 | 87.098 | 84.083 | 120.131 | 216.100 | 301.168 | 381.218 | 389.221 | 414.238 | 486.281 | 583.255 | 600.289 | 816.814 | 877.298 <sup>PH2</sup> | 899.388 | 780.328 | 776.288 | 782.316 | 827.384 | 872.388 | 806.384 | 1004.518 | 1119.487 | 1190.530 |
|-------------------------|--------|--------|--------|--------|---------|---------|---------|---------|---------|---------|---------|---------|---------|---------|------------------------|---------|---------|---------|---------|---------|---------|---------|----------|----------|----------|
| Frag. Inten. (% of TIC) | 0.21   | 0.28   | 1.51   | 1.27   | 1.62    | 2.49    | 12.50   | 2.31    | 2.72    | 13.49   | 9.45    | 2.38    | 5.57    | 2.25    | 1.99                   | 3.46    | 1.58    | 1.50    | 4.35    | 1.90    | 1.59    | 10.21   | 2.73     | 5.96     | 5.82     |
| Rel. Inten. (% of BP)   | 1.59   | 2.10   | 11.95  | 13.88  | 12.04   | 18.44   | 92.68   | 17.13   | 20.20   | 100.00  | 70.06   | 17.65   | 41.33   | 16.70   | 14.79                  | 26.66   | 11.72   | 11.85   | 32.68   | 14.10   | 11.77   | 75.68   | 20.27    | 44.22    | 43.15    |
| Score                   | 0.50   | 0.22   | -0.12  | -0.14  | -0.12   | 0.75    | 0.50    | -0.17   | 0.75    | 0.50    | 0.50    | 1.50    | 0.50    | -0.17   | -0.15                  | 0.50    | -0.12   | 0.50    | 1.50    | -0.14   | -0.12   | 1.50    | 1.50     | 1.50     | 1.50     |
| Ion-type                | V      | LI     |        |        | DV      | b2      | b2      | ADVI    | b5      | b4      | y4      | b5      | b5      |         | b8                     | b8      | y6-NH8  | y6      |         |         | y7      | y6      | y6       | y6       | y10      |
| Delta ppm               | 11.4   | 13.5   |        |        |         | -18.3   | -10.1   |         | -9.5    | -9.9    | 0.8     | -4.9    | -13.9   |         | -11.4                  |         | -18.8   | -15.4   |         |         |         | -18.5   | 38.7     | -9.5     | -11.7    |

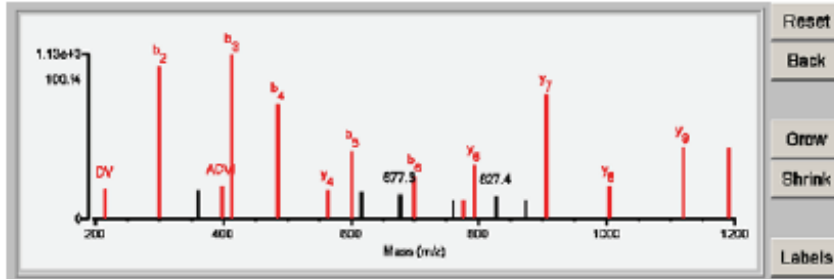

178

Detailed Results

| Rank | Score | SP1 (%) | BCS | # Unmatched ions | Sequence                                      | MH <sup>+</sup> Calculated (Da) | MH <sup>+</sup> Error (Da) | MH <sup>+</sup> Error (ppm) | Protein MW/pi (Da) | Species | Accession #      | M3-Digest Index # | Protein Name                                  |
|------|-------|---------|-----|------------------|-----------------------------------------------|---------------------------------|----------------------------|-----------------------------|--------------------|---------|------------------|-------------------|-----------------------------------------------|
| 1    | 16.08 | 86.7    | 10  | 8/25             | (A) V V S I L I L I E I I V I I S / S / R (K) | 1943.7258                       | -0.0048                    | -3.4                        | 115704.6/8.60      | HUMAN   | Q8H0A0<br>384011 |                   | N-acetyltransferase 10 - Homo sapiens (Human) |

  

| Fragment-Ion (m/z)      | 59.049 | 88.087 | 89.082 | 171.138 | 176.114 | 188.071 | 189.149 | 272.170 | 273.172 | 276.101 | 370.180 | 373.217 | 388.188 | 488.302 | 601.288 | 677.187 | 686.374 | 690.316 | 714.399 | 768.383 | 768.389 | 843.441 | 868.418 | 954.476 | 968.632 |
|-------------------------|--------|--------|--------|---------|---------|---------|---------|---------|---------|---------|---------|---------|---------|---------|---------|---------|---------|---------|---------|---------|---------|---------|---------|---------|---------|
| Frag. Inten. (% of TIC) | 1.80   | 0.24   | 1.43   | 1.98    | 1.50    | 1.53    | 1.95    | 7.80    | 1.91    | 1.69    | 7.43    | 15.95   | 6.31    | 3.98    | 7.09    | 1.36    | 3.56    | 3.31    | 4.52    | 4.30    | 2.52    | 7.26    | 3.92    | 1.34    | 5.31    |
| Rel. Inten. (% of BP)   | 11.28  | 1.52   | 8.98   | 12.43   | 9.39    | 9.56    | 12.23   | 48.90   | 11.97   | 10.62   | 46.58   | 100.00  | 39.55   | 24.98   | 44.49   | 8.51    | 22.35   | 20.79   | 28.36   | 26.98   | 15.78   | 45.52   | 24.60   | 8.43    | 33.32   |
| Score                   | -0.11  | 0.22   | -0.09  | -0.12   | 1.50    | 0.50    | -0.12   | 1.50    | -0.12   | 0.50    | 0.25    | 1.50    | 0.50    | 1.50    | 0.50    | -0.09   | 1.50    | 0.50    | 1.50    | 0.50    | -0.16   | 1.50    | 0.50    | -0.08   | 1.50    |
| Ion-type                |        | LI     |        |         | y1      | b1      | y2      | b2      | b2      | b3-H2O  | y3      | b3      | y4      | b4      | b4      | y5      | b5      | b5      | y6      | b6      |         | y7      | b7      | y8      | y8      |
| Delta ppm               |        | 5.5    |        |         |         | -30.0   | -20.1   |         |         | -21.8   | -2.7    | -7.0    | -9.4    | -2.6    | -11.4   |         | 4.0     | -4.5    | -20.9   | 2.9     |         | -19.5   | -11.5   |         | -9.4    |

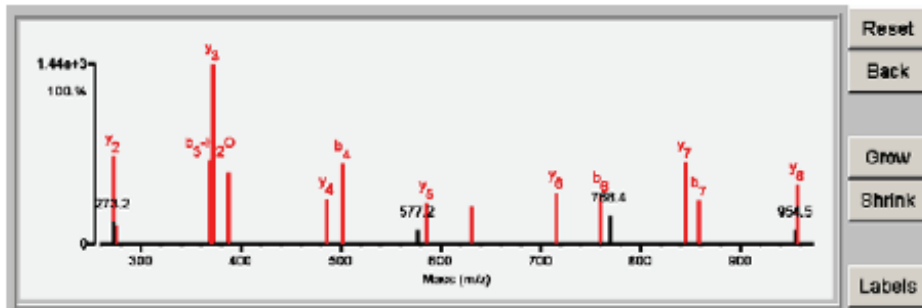

179

Detailed Results

| Rank | Score | SPI (%) | BCS | # Unmatched Ions | Sequence                                                                      | MH <sup>+</sup> Calculated (Da) | MH <sup>+</sup> Error (Da) | MH <sup>+</sup> Error (ppm) | Protein MW(pI) (Da) | Species | Accession #            | MS-Digest Index #      | Protein Name                               |
|------|-------|---------|-----|------------------|-------------------------------------------------------------------------------|---------------------------------|----------------------------|-----------------------------|---------------------|---------|------------------------|------------------------|--------------------------------------------|
| 1    | 12.63 | 63.5    | 11  | 11/25            | (R) D P A E T L H L S E P L G G K / L / L / E / E / Y / T / Q / L / A / R (E) | 3003.4591                       | 0.0149                     | 5.0                         | 35896.77.91         | HUMAN   | <a href="#">Q86X76</a> | <a href="#">373199</a> | Nitrilase homolog 1 - Homo sapiens (Human) |

  

| Fragment-Ion (m/z)      | 70.065 | 72.081 | 84.084 | 86.095 | 116.071 | 133.063 | 175.114 | 246.157 | 359.237 | 487.300 | 495.243 | 588.342 | 639.799 <sup>+2</sup>         | 751.406 | 838.372 | 838.879 | 880.445 | 884.943 <sup>+2</sup> | 894.904 <sup>+2</sup> | 951.220 | 957.155             | 991.457 | 1009.492 | 1122.586 | 1235.670 |
|-------------------------|--------|--------|--------|--------|---------|---------|---------|---------|---------|---------|---------|---------|-------------------------------|---------|---------|---------|---------|-----------------------|-----------------------|---------|---------------------|---------|----------|----------|----------|
| Frac. Inten. (% of TIC) | 0.00   | 3.95   | 2.65   | 0.18   | 2.12    | 2.46    | 3.34    | 3.15    | 2.39    | 2.19    | 2.45    | 5.35    | 4.58                          | 7.98    | 6.53    | 4.03    | 6.88    | 2.22                  | 5.30                  | 2.49    | 2.28                | 4.06    | 9.61     | 9.57     | 4.23     |
| Rel. Inten. (% of BP)   | 0.04   | 41.07  | 27.61  | 1.90   | 22.03   | 25.60   | 34.79   | 32.78   | 24.90   | 22.78   | 25.46   | 55.64   | 47.70                         | 83.08   | 67.94   | 41.94   | 71.58   | 23.07                 | 55.20                 | 25.90   | 23.69               | 42.24   | 100.00   | 99.56    | 44.05    |
| Score                   | 0.20   | -0.41  | -0.28  |        | 0.22    | -0.22   | 1.50    | 1.50    | 1.50    | 1.50    | -0.25   | 1.50    | 0.50                          | 1.50    | -0.68   | -0.42   | 1.50    | -0.23                 | -0.55                 | -0.26   | -0.24               | 0.50    | 1.50     | 1.50     | 1.50     |
| Ion-type                | PR     |        |        | LI     |         |         | y1      | y2      | y3      | y4      |         | y5      | b <sub>11</sub> <sup>+2</sup> | y6      |         | y7      |         |                       |                       |         | y8-H <sub>2</sub> O | y8      | y9       | y10      |          |
| Delta ppm               | -1.8   |        |        | -20.0  |         |         | -30.6   | 5.0     | -8.2    | 2.2     |         | -6.6    | 18.1                          | -5.5    |         | -7.8    |         |                       |                       |         | -27.3               | -2.9    | 6.4      | 5.6      |          |

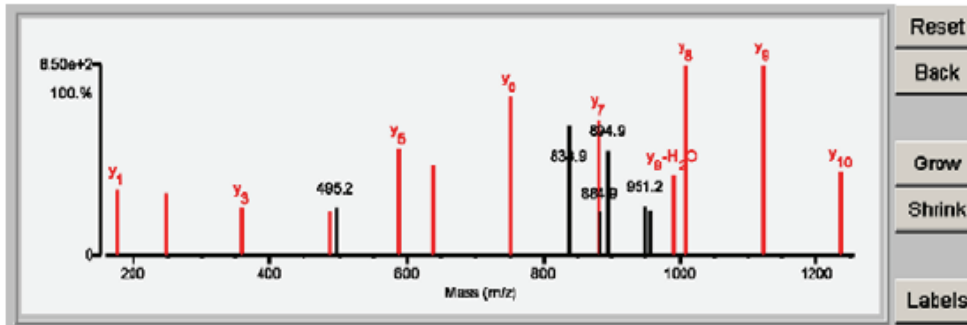

180

Detailed Results

| Rank | Score | SPI (%) | BCS | # Unmatched Ions | Sequence                                          | MH <sup>+</sup> Calculated (Da) | MH <sup>+</sup> Error (Da) | MH <sup>+</sup> Error (ppm) | Protein MW(pI) (Da) | Species | Accession #            | MS-Digest Index #      | Protein Name                                                        |
|------|-------|---------|-----|------------------|---------------------------------------------------|---------------------------------|----------------------------|-----------------------------|---------------------|---------|------------------------|------------------------|---------------------------------------------------------------------|
| 1    | 12.46 | 67.6    | 7   | 11/25            | (E) G A D / H / Q / G / A / G E Q G R P V / R (Q) | 1699.7282                       | 0.0090                     | 6.8                         | 36924.98.88         | HUMAN   | <a href="#">P87808</a> | <a href="#">752808</a> | Nuclease-sensitive element-binding protein 1 - Homo sapiens (Human) |

  

| Fragment-Ion (m/z)      | 70.083 | 72.083 | 143.118 | 175.116 | 187.098 | 217.098        | 304.183 | 420.676 <sup>+2</sup> | 448.127 | 468.742 <sup>+2</sup> | 473.884 <sup>+3</sup> | 474.688 | 486.298 <sup>+2</sup> | 501.727           | 613.774 <sup>+2</sup>              | 688.808 <sup>+2</sup> | 677.804 <sup>+2</sup> | 689.771 <sup>+2</sup> | 817.323 <sup>+2</sup>             | 828.317 <sup>+2</sup> | 834.825 <sup>+2</sup> | 883.838 | 892.340          | 882.858 | 714.814 |
|-------------------------|--------|--------|---------|---------|---------|----------------|---------|-----------------------|---------|-----------------------|-----------------------|---------|-----------------------|-------------------|------------------------------------|-----------------------|-----------------------|-----------------------|-----------------------------------|-----------------------|-----------------------|---------|------------------|---------|---------|
| Frac. Inten. (% of TIC) | 0.00   | 0.10   | 2.27    | 2.53    | 3.27    | 2.78           | 2.14    | 2.62                  | 2.39    | 6.69                  | 3.16                  | 2.06    | 4.70                  | 2.27              | 21.64                              | 2.52                  | 5.78                  | 1.97                  | 4.23                              | 5.15                  | 5.86                  | 4.20    | 4.09             | 2.02    | 5.54    |
| Rel. Inten. (% of BP)   | 0.01   | 0.47   | 10.50   | 11.68   | 15.09   | 12.83          | 9.89    | 12.11                 | 11.05   | 30.93                 | 14.60                 | 9.52    | 21.72                 | 10.49             | 100.00                             | 11.65                 | 26.72                 | 9.10                  | 19.53                             | 23.82                 | 27.10                 | 19.41   | 18.89            | 9.32    | 25.62   |
| Score                   | 0.20   | 0.50   | -0.11   | 1.50    | 0.75    | 0.50           | -0.10   | -0.12                 | 0.50    | 1.50                  | -0.15                 | -0.10   | 1.50                  | -0.10             | 1.50                               | 0.50                  | 1.50                  | -0.09                 | -0.20                             | 0.50                  | 1.50                  | -0.19   | 1.50             | -0.09   | -0.26   |
| Ion-type                | PR     | V      |         | y1      | GE      | b <sub>2</sub> |         | b <sub>4</sub>        |         | y6 <sup>+2</sup>      |                       |         | y9 <sup>+2</sup>      | y10 <sup>+2</sup> | y11-H <sub>2</sub> O <sup>+2</sup> | y11 <sup>+2</sup>     |                       |                       | y12-NH <sub>3</sub> <sup>+2</sup> |                       | y12 <sup>+2</sup>     |         | y <sup>+13</sup> |         |         |
| Delta ppm               | -30.3  | 35.0   |         | -22.6   | -17.8   | 1.7            |         | -17.9                 |         | -9.6                  |                       |         | 2.3                   | -2.5              | 15.1                               | -1.0                  |                       |                       | 6.1                               |                       | -1.7                  |         | -0.5             |         |         |

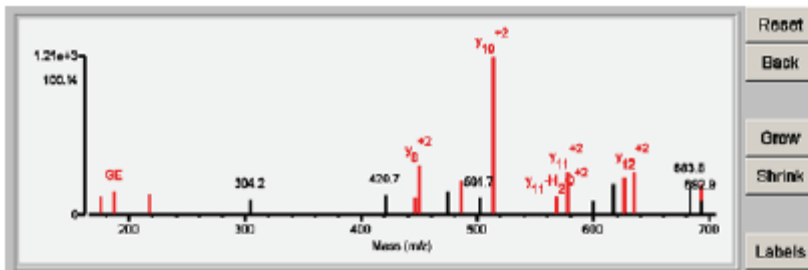

Detailed Results

| Rank | Score | SP1 (%) | BCS | # Unmatched Ions | Sequence                             | MH <sup>+</sup> Calculated (Da) | MH <sup>+</sup> Error (Da) | MH <sup>+</sup> Error (ppm) | Protein MW (kDa) | Species | Accession #   | MS-Digest Index #                                            | Protein Name |
|------|-------|---------|-----|------------------|--------------------------------------|---------------------------------|----------------------------|-----------------------------|------------------|---------|---------------|--------------------------------------------------------------|--------------|
| 1    | 12.02 | 84.2    | 8   | 10/25            | (F)D I I A (Y) D (G) E / P L G R (V) | 1229.6891                       | -0.0006                    | -0.4                        | 18012.8/7.68     | HUMAN   | P62937 428899 | Peptidyl-prolyl cis-trans Isomerase A - Homo sapiens (Human) |              |

  

| Fragment-Ion (m/z)      | 70.086 | 72.081 | 88.097 | 84.086 | 104.060 | 120.083 | 138.074 | 143.118 | 176.082 | 171.116 | 388.164 | 442.276 | 487.220 | 648.758 | 671.323 | 802.249 | 824.271 | 828.334 | 869.270 | 701.310 | 726.866 | 737.370 | 743.383 | 842.436 | 813.474 |
|-------------------------|--------|--------|--------|--------|---------|---------|---------|---------|---------|---------|---------|---------|---------|---------|---------|---------|---------|---------|---------|---------|---------|---------|---------|---------|---------|
| Frag. Inten. (% of TIC) | 0.00   | 0.09   | 0.43   | 1.77   | 1.25    | 2.50    | 1.92    | 1.96    | 1.13    | 12.29   | 17.50   | 7.93    | 3.49    | 1.23    | 1.23    | 1.77    | 1.41    | 7.29    | 1.17    | 1.05    | 1.39    | 1.55    | 17.14   | 8.08    | 4.42    |
| Rel. Inten. (% of BP)   | 0.01   | 0.54   | 2.45   | 10.11  | 7.15    | 14.31   | 10.95   | 11.19   | 6.44    | 70.22   | 100.00  | 45.33   | 19.93   | 7.02    | 7.01    | 10.11   | 8.08    | 41.66   | 6.66    | 5.98    | 7.94    | 8.86    | 97.94   | 46.17   | 25.27   |
| Score                   | 0.20   | 0.50   | 0.22   | -0.10  | -0.07   | -0.14   | -0.11   | -0.11   | -0.06   | 0.50    | 0.50    | 1.50    | 0.50    | -0.07   | 1.50    | 0.50    | -0.08   | 1.50    | 0.50    | -0.06   | 0.50    | -0.09   | 1.50    | 1.50    | 1.50    |
| Ion-type                | PR     | V      | LI     |        |         |         |         |         |         | b2      | b3      | y4      | b4      |         | y5      | b5      |         | y6      | b6      |         | y7-H2O  |         | y7      | y8      | y9      |
| Delta ppm               | -4.6   | 1.7    | 7.8    |        |         |         |         |         |         | -10.0   | -2.8    | -4.2    | -5.7    |         | 5.7     | -1.4    |         | -11.6   | -2.0    |         | -4.1    |         | -6.9    | -1.5    | 0.0     |

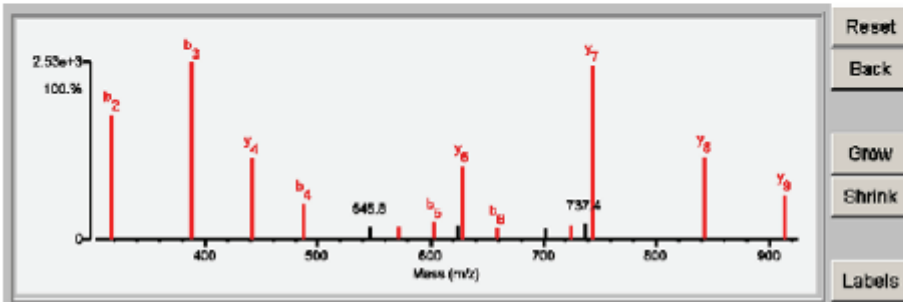

Detailed Results

| Rank | Score | SP1 (%) | BCS | # Unmatched Ions | Sequence                           | MH <sup>+</sup> Calculated (Da) | MH <sup>+</sup> Error (Da) | MH <sup>+</sup> Error (ppm) | Protein MW (kDa) | Species | Accession #   | MS-Digest Index #               | Protein Name |
|------|-------|---------|-----|------------------|------------------------------------|---------------------------------|----------------------------|-----------------------------|------------------|---------|---------------|---------------------------------|--------------|
| 1    | 11.24 | 70.8    | 3   | 8/25             | (K)R T V P T G D I / A / L / R (P) | 1288.8885                       | -0.0082                    | -7.2                        | 165004.8/7.58    | HUMAN   | Q8BXK0 431723 | Perlecan - Homo sapiens (Human) |              |

  

| Fragment-Ion (m/z)      | 70.086 | 72.080 | 88.098 | 131.080 | 168.078 | 188.131 | 176.118 | 187.128 | 201.128 | 228.117 | 254.160 | 288.189 | 369.241  | 388.188 | 387.186 | 460.762 <sup>+2</sup> | 508.289 <sup>+2</sup> | 684.814 <sup>+2</sup> | 675.328 | 683.314 | 823.368 | 704.388 | 803.440 | 800.483 | 1016.521 |
|-------------------------|--------|--------|--------|---------|---------|---------|---------|---------|---------|---------|---------|---------|----------|---------|---------|-----------------------|-----------------------|-----------------------|---------|---------|---------|---------|---------|---------|----------|
| Frag. Inten. (% of TIC) | 0.00   | 0.05   | 0.39   | 1.73    | 6.33    | 1.10    | 1.84    | 0.98    | 0.99    | 2.15    | 6.51    | 1.24    | 1.66     | 1.95    | 8.18    | 16.58                 | 4.10                  | 1.39                  | 2.70    | 0.97    | 1.27    | 4.10    | 1.88    | 24.63   | 7.17     |
| Rel. Inten. (% of BP)   | 0.01   | 0.20   | 1.58   | 7.03    | 25.71   | 4.48    | 7.48    | 3.97    | 4.03    | 8.73    | 26.42   | 5.05    | 6.73     | 7.94    | 33.22   | 67.73                 | 16.64                 | 5.65                  | 10.94   | 3.93    | 5.17    | 16.65   | 7.62    | 100.00  | 29.12    |
| Score                   | 0.20   | 0.50   | 0.22   | 0.50    | 0.75    | 0.50    | 1.50    | 0.75    | 0.75    | 0.75    | -0.26   | 1.50    | 1.50     | 0.50    | 0.75    | 0.50                  | -0.17                 | -0.06                 | -0.11   |         | -0.05   | -0.17   | -0.09   | 0.50    | -0.29    |
| Ion-type                | PR     | V      | LI     | TG-28   | TG      | VP-28   | y1      | VP      | TV      | DL      | y2      | y3      | TGDL-H2O | TGDL    |         | a8 <sup>+2</sup>      |                       |                       |         | VPTGDL  |         |         | a8      | a8      |          |
| Delta ppm               | -1.8   | -6.6   | -1.5   | -19.1   | -11.4   | -20.9   | -6.6    | -18.0   | 8.1     | -8.6    |         | -12.9   | 2.4      | -25.1   | -10.4   | 39.2                  |                       |                       |         | 7.9     |         |         |         | 34.8    |          |

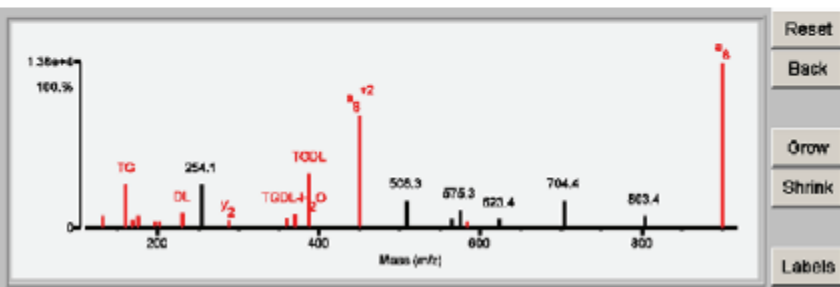



183

Detailed Results

| Rank                    | Score  | SPI (%) | BCS    | # Unmatched Ions | Sequence                                               | MH <sup>+</sup> Calculated (Da) | MH <sup>+</sup> Error (Da) | MH <sup>+</sup> Error (ppm) | Protein MW (Da) | Species | Accession # | MS-Digest Index #     | Protein Name                                                    |         |                       |                       |                   |                       |                       |                   |                       |                       |                       |                        |                        |
|-------------------------|--------|---------|--------|------------------|--------------------------------------------------------|---------------------------------|----------------------------|-----------------------------|-----------------|---------|-------------|-----------------------|-----------------------------------------------------------------|---------|-----------------------|-----------------------|-------------------|-----------------------|-----------------------|-------------------|-----------------------|-----------------------|-----------------------|------------------------|------------------------|
| 1                       | 17.36  | 93.3    | 11     | 4/25             | (R)D Q H D T F F L R D P A E A L Q L P M D Y V Q R (V) | 2993.3920                       | 0.0405                     | 13.5                        | 57563.9731      | HUMAN   | Q9Y285      | 619389                | Phenylalanyl-tRNA synthetase alpha chain - Homo sapiens (Human) |         |                       |                       |                   |                       |                       |                   |                       |                       |                       |                        |                        |
| Fragment-ion (m/z)      | 70.066 | 72.082  | 84.043 | 86.097           | 101.071                                                | 110.072                         | 136.074                    | 153.102                     | 175.118         | 201.106 | 242.150     | 454.723 <sup>+2</sup> | 565.313                                                         | 680.347 | 682.298 <sup>+2</sup> | 766.334 <sup>+2</sup> | 811.376           | 830.863 <sup>+2</sup> | 866.380 <sup>+2</sup> | 908.429           | 922.923 <sup>+2</sup> | 931.440 <sup>+2</sup> | 986.952 <sup>+2</sup> | 1021.512 <sup>+2</sup> | 1043.508 <sup>+2</sup> |
| Frac. Inten. (% of TIC) | 0.01   | 0.06    | 0.11   | 0.56             | 0.10                                                   | 0.07                            | 0.04                       | 1.40                        | 2.03            | 1.56    | 1.29        | 8.00                  | 3.17                                                            | 3.14    | 1.57                  | 3.16                  | 2.83              | 10.07                 | 21.69                 | 18.51             | 5.80                  | 2.14                  | 8.89                  | 1.57                   | 2.22                   |
| Rel. Inten. (% of BP)   | 0.02   | 0.26    | 0.52   | 2.57             | 0.47                                                   | 0.32                            | 0.19                       | 6.48                        | 9.36            | 7.20    | 5.97        | 36.90                 | 14.61                                                           | 14.49   | 7.23                  | 14.58                 | 13.04             | 46.43                 | 100.00                | 85.33             | 26.76                 | 9.88                  | 40.98                 | 7.24                   | 10.23                  |
| Score                   | 0.20   | 0.50    | 1.00   | 0.22             | 0.50                                                   | 1.00                            | 1.00                       | -0.06                       | 1.50            | -0.07   | 0.75        | 1.50                  | 1.50                                                            | 1.50    | 0.50                  | 0.50                  | 1.50              | 0.50                  | 0.50                  | 1.50              | 0.50                  | -0.10                 | 0.50                  | 0.50                   | 0.50                   |
| Ion-type                | PR     | V       | E      | LI               | QK                                                     | H                               | Y                          |                             | Y1              |         | QL          | y7 <sup>+2</sup>      | b10 <sup>+2</sup>                                               | y4      | y5                    | b10 <sup>+2</sup>     | b12 <sup>+2</sup> | y5                    | b13 <sup>+2</sup>     | b14 <sup>+2</sup> | y7                    | b15 <sup>+2</sup>     | b16 <sup>+2</sup>     |                        | b17 <sup>+2</sup>      |
| Delta ppm               | 6.8    | 10.0    | -10.6  | 4.3              | 3.6                                                    | 2.1                             | -11.0                      |                             | -7.1            |         | -4.8        | 9.3                   | 6.4                                                             | 15.3    | 10.2                  | -2.8                  | -0.7              | 6.7                   | 4.8                   | -0.4              | 5.9                   | 4.9                   |                       |                        | 18.6                   |

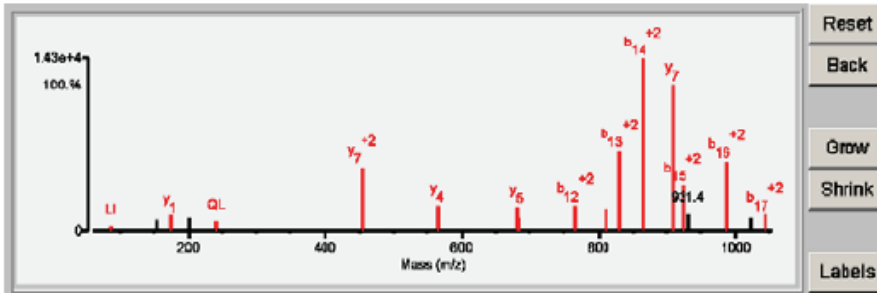

184

Detailed Results

| Rank                    | Score  | SPI (%) | BCS    | # Unmatched Ions | Sequence                                           | MH <sup>+</sup> Calculated (Da) | MH <sup>+</sup> Error (Da) | MH <sup>+</sup> Error (ppm) | Protein MW (Da) | Species | Accession # | MS-Digest Index # | Protein Name                                     |         |                       |                       |                       |         |         |         |         |         |          |          |          |
|-------------------------|--------|---------|--------|------------------|----------------------------------------------------|---------------------------------|----------------------------|-----------------------------|-----------------|---------|-------------|-------------------|--------------------------------------------------|---------|-----------------------|-----------------------|-----------------------|---------|---------|---------|---------|---------|----------|----------|----------|
| 1                       | 20.30  | 87.7    | 11     | 1/25             | (C)A N I P V A I A I G I S V I I L L E N I L R (F) | 1625.8880                       | -0.0028                    | -1.7                        | 44816.01830     | HUMAN   | P00568      | 413803            | Phosphoglycerate kinase 1 - Homo sapiens (Human) |         |                       |                       |                       |         |         |         |         |         |          |          |          |
| Fragment-ion (m/z)      | 70.066 | 72.082  | 86.098 | 87.066           | 274.087                                            | 283.106                         | 371.142                    | 402.247                     | 426.143         | 442.177 | 519.216     | 631.282           | 670.223                                          | 898.251 | 844.376               | 887.886 <sup>+2</sup> | 878.905 <sup>+2</sup> | 738.321 | 767.471 | 889.428 | 870.632 | 888.806 | 1068.842 | 1113.641 | 1184.707 |
| Frac. Inten. (% of TIC) | 0.00   | 0.06    | 0.15   | 0.06             | 2.01                                               | 2.32                            | 6.28                       | 4.73                        | 3.44            | 7.53    | 5.09        | 5.93              | 4.43                                             | 2.05    | 4.76                  | 3.37                  | 11.49                 | 4.83    | 4.03    | 2.31    | 7.70    | 2.80    | 4.25     | 7.03     | 3.33     |
| Rel. Inten. (% of BP)   | 0.02   | 0.53    | 1.32   | 0.52             | 17.50                                              | 20.19                           | 54.61                      | 41.19                       | 29.92           | 65.52   | 44.28       | 51.63             | 38.57                                            | 17.80   | 41.40                 | 29.28                 | 100.00                | 42.05   | 35.10   | 20.09   | 67.00   | 24.37   | 37.00    | 61.20    | 28.98    |
| Score                   | 0.20   | 0.50    | 0.22   | 0.33             | 0.50                                               | -0.20                           | 0.50                       | 1.50                        | 0.25            | 0.50    | 1.50        | 0.50              | 0.25                                             | 1.50    | 0.50                  | 0.50                  | 1.50                  | 0.25    | 1.50    | 0.50    | 1.50    | 1.50    | 1.50     | 1.50     | 1.50     |
| Ion-type                | PR     | V       | LI     | NR               | b2                                                 | b3                              | y3                         | b4-NH3                      | b4              | b5      | y4          | b6                | b7-H2O                                           | y5      | y13-H2O <sup>+2</sup> | y13 <sup>+2</sup>     | b8-H2O                | y6      | b9      | y7      | y8      | y9      | y10      | y11      |          |
| Delta ppm               | 5.3    | 19.8    | 19.4   | 1.3              | 1.8                                                |                                 | 6.3                        | 2.4                         | -16.8           | 0.0     | 5.1         | -11.6             | -20.4                                            | -8.3    | 6.1                   | 4.5                   | 14.1                  | -5.5    | 18.3    | 7.6     | -10.3   | -3.9    | 0.9      | -19.2    | 5.8      |

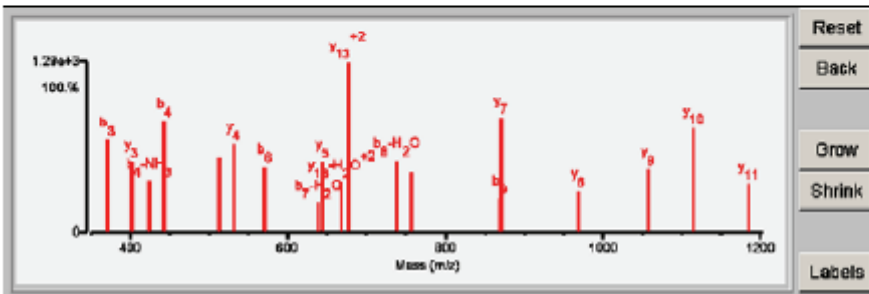

185

Detailed Results

| Rank | Score | SPI (%) | BCS | # Unmatched Ions | Sequence                | MH <sup>+</sup> Calculated (Da) | MH <sup>+</sup> Error (Da) | MH <sup>+</sup> Error (ppm) | Protein MW/PI (Da) | Species | Accession # | MS-Digest Index # | Protein Name                                     |
|------|-------|---------|-----|------------------|-------------------------|---------------------------------|----------------------------|-----------------------------|--------------------|---------|-------------|-------------------|--------------------------------------------------|
| 1    | 13.23 | 77.9    | 6   | 9/25             | (S) V/I/L/L E/N/L/R (F) | 1057.6074                       | 0.0007                     | 0.7                         | 44615.0/8.30       | HUMAN   | P00558      | 413803            | Phosphoglycerate kinase 1 - Homo sapiens (Human) |
| 1    | 13.23 | 77.9    | 6   | 9/25             | (S) V/I/L/L E/N/L/R (F) | 1057.6074                       | 0.0007                     | 0.7                         | 44796.4/8.74       | HUMAN   | P07205      | 413827            | Phosphoglycerate kinase 2 - Homo sapiens (Human) |

  

| Fragment-ion (m/z)      | 72.080 | 86.097 | 117.100 | 129.144 | 147.085 | 155.112 | 158.089 | 160.075 | 175.120 | 199.184 | 200.137 | 228.131 | 288.201 | 301.154 | 339.168 | 357.171 | 385.216 | 402.245 | 414.238 <sup>+2</sup> | 443.262 <sup>+2</sup> | 532.283 | 607.314 | 644.369 | 757.460 | 870.518 |       |
|-------------------------|--------|--------|---------|---------|---------|---------|---------|---------|---------|---------|---------|---------|---------|---------|---------|---------|---------|---------|-----------------------|-----------------------|---------|---------|---------|---------|---------|-------|
| Frac. Inten. (% of TIC) | 0.08   | 1.42   | 1.52    | 1.58    | 1.88    | 1.45    | 2.22    | 2.16    | 6.88    | 5.05    | 3.39    | 2.24    | 1.99    | 13.67   | 1.41    | 1.84    | 2.26    | 3.35    | 3.67                  | 1.83                  | 3.43    | 1.70    | 22.30   | 11.33   | 1.56    |       |
| Rel. Inten. (% of BP)   | 0.27   | 6.38   | 6.83    | 7.09    | 8.42    | 6.49    | 9.97    | 9.68    | 30.85   | 22.64   | 15.22   | 10.06   | 8.94    | 61.31   | 6.34    | 7.34    | 10.13   | 15.03   | 16.46                 | 8.22                  | 15.36   | 7.62    | 100.00  | 50.81   | 7.01    |       |
| Score                   | 0.50   | 0.22   | -0.07   | -0.07   | -0.08   | -0.06   | 0.50    | 0.50    | 1.50    | -0.23   | 0.50    | 0.75    | 1.50    | 0.50    | 0.50    | 0.75    | 1.50    | 1.50    | 1.50                  | 0.50                  | 1.50    | -0.16   | -0.08   | -0.15   | -0.08   | 1.50  |
| Ion-type                | V      | LI     | LI      |         |         |         | y1-NH3  | a1      | y1      | NL-28   | NL      | y2      | b2      | ENL-H2O | ENL     | y3-NH3  | y3      |         |                       |                       |         |         |         | y5      | y6      | y7    |
| Delta ppm               | -13.5  | 4.3    |         |         |         |         | -21.5   | -29.7   | 8.3     |         | -17.2   | -21.3   | -5.6    | -18.1   | 3.0     | -20.3   | -9.1    | -3.1    |                       |                       |         |         |         | -5.7    | 3.7     | -26.0 |

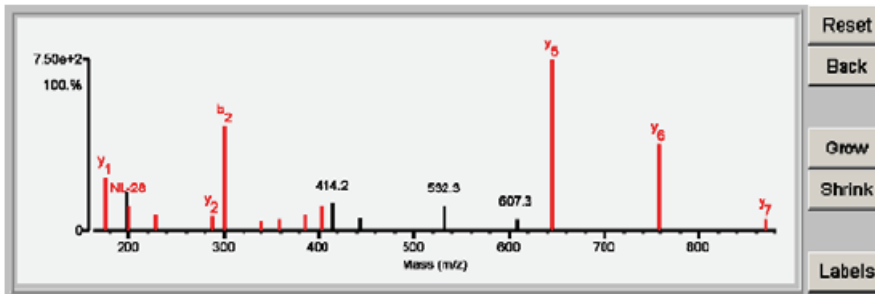

186

Detailed Results

| Rank | Score | SPI (%) | BCS | # Unmatched Ions | Sequence                    | MH <sup>+</sup> Calculated (Da) | MH <sup>+</sup> Error (Da) | MH <sup>+</sup> Error (ppm) | Protein MW/PI (Da) | Species | Accession # | MS-Digest Index # | Protein Name                                     |
|------|-------|---------|-----|------------------|-----------------------------|---------------------------------|----------------------------|-----------------------------|--------------------|---------|-------------|-------------------|--------------------------------------------------|
| 1    | 11.73 | 67.5    | 6   | 8/25             | (R) R/Q/S/A/N/H/L/E/N/R (F) | 1400.6012                       | 0.0127                     | 9.0                         | 2894.1/6.68        | HUMAN   | P18669      | 413507            | Phosphoglycerate mutase 1 - Homo sapiens (Human) |

  

| Fragment-ion (m/z)      | 70.066 | 72.082 | 84.044 | 86.096 | 87.055 | 101.069 | 110.071 | 130.064 | 159.091 | 175.116 | 187.090 | 195.087 | 289.162 | 323.153 | 333.151 | 400.188 | 418.200 | 436.186 | 439.178 | 531.289 | 542.212 | 570.196 | 628.308 | 645.330 | 756.283 |
|-------------------------|--------|--------|--------|--------|--------|---------|---------|---------|---------|---------|---------|---------|---------|---------|---------|---------|---------|---------|---------|---------|---------|---------|---------|---------|---------|
| Frac. Inten. (% of TIC) | 0.00   | 7.98   | 0.07   | 0.38   | 0.08   | 2.02    | 0.16    | 0.18    | 0.53    | 4.09    | 4.90    | 2.93    | 5.96    | 2.58    | 7.02    | 3.40    | 9.25    | 2.73    | 2.33    | 9.20    | 3.35    | 9.44    | 6.39    | 10.75   | 4.29    |
| Rel. Inten. (% of BP)   | 0.03   | 74.24  | 0.64   | 3.49   | 0.71   | 18.75   | 1.52    | 1.66    | 4.93    | 38.03   | 45.57   | 27.23   | 55.40   | 23.96   | 65.28   | 31.65   | 86.00   | 25.43   | 21.66   | 85.61   | 31.15   | 87.85   | 59.42   | 100.00  | 39.91   |
| Score                   | 0.20   | -0.74  | 1.00   | 0.22   | 0.33   | -0.19   | 1.00    | 2.00    | 1.50    | -0.46   | -0.27   | 1.50    | -0.24   | -0.65   | 0.50    | 1.50    | 1.50    | -0.25   | -0.22   | 1.50    | 0.50    | 0.50    | 0.50    | 1.50    | 0.50    |
| Ion-type                | PR     |        | E      | LI     | NR     |         | H       | W       | W       | y1      |         | y2      |         |         | y3-H2O  | y3      |         |         |         | y4      | a5      | b5      | y5-NH3  | y5      | b5      |
| Delta ppm               | 5.3    |        | -3.5   | -6.1   | 0.1    |         | -0.7    |         | -4.9    | -16.9   |         | 1.5     |         |         | -14.0   | -11.9   |         |         |         | 1.8     | 15.0    | -1.7    | 4.9     | -1.6    | 6.0     |

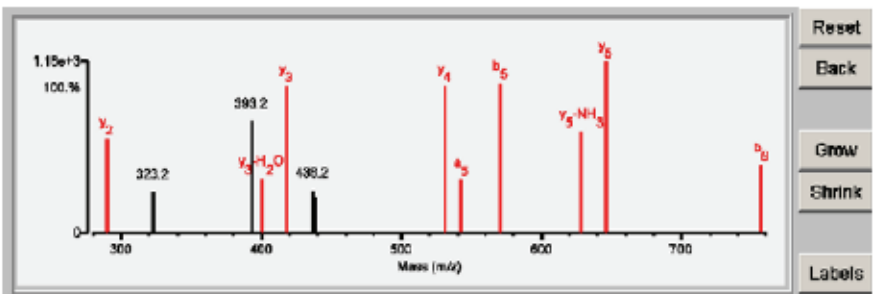

187

Detailed Results

| Rank | Score | SPI (%) | BCS | # Unmatched Ions | Sequence                                                            | MH <sup>+</sup> Calculated (Da) | MH <sup>+</sup> Error (Da) | MH <sup>+</sup> Error (ppm) | Protein MW (kDa) | Species | Accession #   | MS-Digest Index #                                               | Protein Name |
|------|-------|---------|-----|------------------|---------------------------------------------------------------------|---------------------------------|----------------------------|-----------------------------|------------------|---------|---------------|-----------------------------------------------------------------|--------------|
| 1    | 11.02 | 56.4    | 8   | 10/25            | (R) I L S F A H P P S A E V E A I / A / L / A / T / L / R D / R (M) | 2433.2231                       | 0.0107                     | 4.4                         | 144665.0/5.50    | HUMAN   | O15067 450047 | Phosphoribosylformylglycinamide synthase - Homo sapiens (Human) |              |

  

| Fragment-Ion (m/z)      | 70.065 | 72.078 | 86.096 | 102.054 | 110.076 | 120.078 | 173.130 | 175.119 | 185.131 | 201.124 | 416.268 | 427.195 | 523.248 | 523.738 | 531.282 | 532.265 <sup>+2</sup> | 540.296 | 641.348 | 677.291 | 686.835 | 712.375 | 741.401 | 825.460 | 896.485 | 939.519 <sup>+2</sup> |
|-------------------------|--------|--------|--------|---------|---------|---------|---------|---------|---------|---------|---------|---------|---------|---------|---------|-----------------------|---------|---------|---------|---------|---------|---------|---------|---------|-----------------------|
| Frac. Inten. (% of TIC) | 0.01   | 0.14   | 0.93   | 0.21    | 4.38    | 0.36    | 6.44    | 7.64    | 6.00    | 4.03    | 4.71    | 3.38    | 10.51   | 3.32    | 3.83    | 4.20                  | 3.41    | 4.29    | 3.71    | 3.26    | 7.56    | 5.43    | 4.11    | 4.15    | 3.99                  |
| Rel. Inten. (% of BP)   | 0.08   | 1.35   | 8.85   | 1.95    | 41.71   | 3.44    | 61.28   | 72.71   | 57.10   | 38.37   | 44.77   | 32.20   | 100.00  | 31.55   | 36.46   | 39.97                 | 32.42   | 40.88   | 35.27   | 31.03   | 71.95   | 51.67   | 39.10   | 39.45   | 37.99                 |
| Score                   | 0.20   | 0.50   | 0.22   | 1.00    | -0.42   | 1.00    | -0.61   | 1.50    | 0.75    | -0.38   | -0.45   | 1.50    | 0.50    | -0.32   | -0.36   | -0.40                 | 1.50    | 1.50    | 0.50    | -0.31   | 1.50    | -0.52   | 1.50    | 1.50    | -0.38                 |
| Ion-type                | PR     | V      | LI     | E       | F       | F       | LA      | y1      | LA      | y3      | y4-NH3  | y3      | y4-NH3  |         |         |                       | y4      | y5      | b++12   | y6      |         | y7      | y8      |         |                       |
| Delta ppm               | -7.5   | -33.0  | -1.5   | -9.4    |         | -19.8   |         | -0.3    | 5.7     |         |         | -22.3   | -27.9   |         |         |                       | 12.8    | 17.9    | -29.6   | 2.2     |         | 2.1     |         | -11.3   |                       |

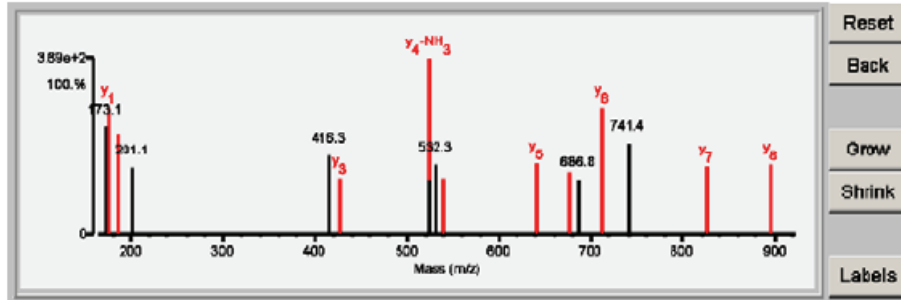

188

Detailed Results

| Rank | Score | SPI (%) | BCS | # Unmatched Ions | Sequence                                  | MH <sup>+</sup> Calculated (Da) | MH <sup>+</sup> Error (Da) | MH <sup>+</sup> Error (ppm) | Protein MW (kDa) | Species | Accession #   | MS-Digest Index #                | Protein Name |
|------|-------|---------|-----|------------------|-------------------------------------------|---------------------------------|----------------------------|-----------------------------|------------------|---------|---------------|----------------------------------|--------------|
| 1    | 20.22 | 86.4    | 9   | 4/25             | (D) D I I I V I N I V I W I E T L I I (E) | 1558.7888                       | 0.0017                     | 1.1                         | 70289.7/6.20     | HUMAN   | P13798 421847 | Plastin-2 - Homo sapiens (Human) |              |

  

| Fragment-Ion (m/z)      | 72.080 | 84.080 | 86.088 | 120.080 | 175.117 | 278.117 | 288.120 | 317.118 | 327.204 | 388.249 | 430.200 | 518.289 | 528.288 | 618.337           | 822.337 <sup>+2</sup> | 832.336 | 843.314 | 731.406 | 829.382 | 917.488 | 1014.508 | 1031.524 | 1113.546 | 1130.588 | 1243.678 |
|-------------------------|--------|--------|--------|---------|---------|---------|---------|---------|---------|---------|---------|---------|---------|-------------------|-----------------------|---------|---------|---------|---------|---------|----------|----------|----------|----------|----------|
| Frac. Inten. (% of TIC) | 0.04   | 0.99   | 0.47   | 1.23    | 1.46    | 1.32    | 1.16    | 15.23   | 1.04    | 1.92    | 18.03   | 1.54    | 6.09    | 1.02              | 1.02                  | 5.58    | 1.71    | 6.38    | 3.22    | 4.56    | 0.98     | 13.91    | 1.17     | 8.75     | 1.08     |
| Rel. Inten. (% of BP)   | 0.34   | 5.48   | 2.62   | 6.82    | 8.10    | 7.30    | 6.45    | 84.45   | 5.74    | 10.63   | 100.00  | 8.54    | 33.75   | 5.57              | 5.58                  | 30.95   | 9.50    | 35.38   | 17.85   | 25.82   | 5.44     | 77.13    | 6.45     | 48.51    | 5.97     |
| Score                   | 0.50   | -0.05  | 0.22   | -0.07   | 1.50    | -0.07   | 0.50    | 0.50    | 0.75    | 1.50    | 0.50    | 1.50    | 0.50    | -0.06             | 1.50                  | 1.50    | 0.50    | 1.50    | 0.50    | 1.50    | 0.50     | 1.50     | 0.50     | 1.50     | 1.50     |
| Ion-type                | V      | LI     | LI     |         | y1      | b2      | b2      | IVN     | y3      | b3      | y4      | b4      |         | y10 <sup>+2</sup> | y5                    | b5      | b5      | b6      | b6      | y7      | b6       | y8       | y8-NH3   | y9       | y10      |
| Delta ppm               | -12.1  |        | -0.3   |         | -11.7   |         | -10.9   | 1.7     | 0.1     | -4.6    | -4.5    | -7.3    | -4.1    |                   | -9.3                  | -1.3    | 1.4     | -0.0    | -12.8   | 5.1     |          | -2.6     | -2.4     | -5.3     | -0.0     |

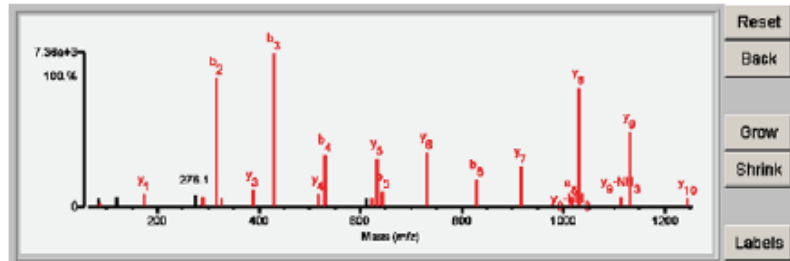

Detailed Results

| Rank | Score | SPI (%) | BCS | # Unmatched Ions | Sequence                             | MH <sup>+</sup> Calculated (Da) | MH <sup>+</sup> Error (Da) | MH <sup>+</sup> Error (ppm) | Protein MW/PI (Da) | Species | Accession #            | MS-Digest Index #      | Protein Name                                      |
|------|-------|---------|-----|------------------|--------------------------------------|---------------------------------|----------------------------|-----------------------------|--------------------|---------|------------------------|------------------------|---------------------------------------------------|
| 1    | 18.48 | 68.0    | 11  | 7/25             | (T) I/S/P L D/LI/A/K/L/R/Q/V/A/R (Q) | 1780.9188                       | -0.0268                    | -14.7                       | 37488.0/8.88       | HUMAN   | <a href="#">Q16385</a> | <a href="#">404801</a> | Poly(rC)-binding protein 1 - Homo sapiens (Human) |

  

| Fragment-ion (m/z)      | 70.088 | 72.079 | 88.085 | 175.115 | 248.161 | 278.130 | 328.188 | 346.218 | 418.198 | 478.273 | 587.317 | 614.280 | 688.385 <sup>+2</sup> | 880.388 <sup>+2</sup> | 700.388 | 727.380 | 733.883 <sup>+2</sup> | 738.883 <sup>+2</sup> | 780.408 <sup>+2</sup> | 788.388 | 870.451 | 941.486 | 989.494 | 988.454 | 1034.540 |
|-------------------------|--------|--------|--------|---------|---------|---------|---------|---------|---------|---------|---------|---------|-----------------------|-----------------------|---------|---------|-----------------------|-----------------------|-----------------------|---------|---------|---------|---------|---------|----------|
| Frac. Inten. (% of TIC) | 0.00   | 0.06   | 0.20   | 2.88    | 3.69    | 2.04    | 5.88    | 2.00    | 2.21    | 2.05    | 8.08    | 3.50    | 3.66                  | 17.08                 | 6.02    | 3.91    | 8.78                  | 6.64                  | 2.74                  | 3.88    | 2.87    | 4.88    | 1.93    | 2.70    | 2.32     |
| Rel. Inten. (% of BP)   | 0.01   | 0.36   | 1.15   | 16.84   | 21.61   | 11.92   | 34.39   | 11.70   | 12.95   | 12.01   | 47.28   | 20.51   | 21.43                 | 100.00                | 35.23   | 22.91   | 51.38                 | 38.88                 | 15.04                 | 22.69   | 15.82   | 28.55   | 11.27   | 15.83   | 13.57    |
| Score                   | 0.20   | 0.50   | 0.22   | 1.50    | 1.50    | -0.12   | 0.75    | 1.50    | 0.75    | 1.50    | 1.50    | 0.50    | -0.21                 | -1.00                 | 1.50    | 0.50    | -0.51                 | 1.50                  | 1.50                  | 0.50    | -0.17   | -0.29   | 1.50    | -0.16   | 1.50     |
| Ion-type                | PR     | V      | LI     | y1      | y2      |         | PLD     | y3      | 8PLD    | y4      | y5      | b5      |                       |                       | y6      | b6      |                       | y12 <sup>+2</sup>     | y13 <sup>+2</sup>     | b7      |         |         | y7      | y8      |          |
| Delta ppm               | 13.9   | -17.7  | -18.9  | -20.3   | -19.4   |         | -19.1   | -19.9   | -19.5   | -20.6   | -15.3   | -10.0   |                       |                       | -16.6   | -15.0   |                       | -16.9                 | -17.4                 | -24.3   |         |         | -26.7   |         | -16.3    |

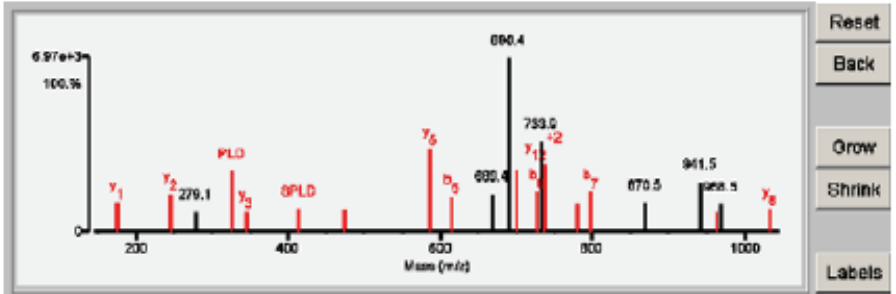

Detailed Results

| Rank | Score | SPI (%) | BCS | # Unmatched Ions | Sequence                                                | MH <sup>+</sup> Calculated (Da) | MH <sup>+</sup> Error (Da) | MH <sup>+</sup> Error (ppm) | Protein MW/PI (Da) | Species | Accession #            | MS-Digest Index #      | Protein Name                                                                  |
|------|-------|---------|-----|------------------|---------------------------------------------------------|---------------------------------|----------------------------|-----------------------------|--------------------|---------|------------------------|------------------------|-------------------------------------------------------------------------------|
| 1    | 10.23 | 68.3    | 5   | 11/25            | (P) G/D/A/P/R/E/L/V/A/L/T/V/Q/S/E/Q/E/A/G/G/O/S/P/R (R) | 2768.3268                       | 0.0262                     | 9.5                         | 77092.2/9.60       | HUMAN   | <a href="#">P56696</a> | <a href="#">286441</a> | Potassium voltage-gated channel subfamily KQT member 4 - Homo sapiens (Human) |

  

| Fragment-ion (m/z)      | 70.065 | 72.081 | 86.096 | 157.132 | 175.115 | 185.131 | 197.130 | 200.132 | 268.163              | 272.173 | 273.173 | 286.178 | 340.188 | 345.140 | 367.229 | 395.230 | 416.231 | 449.694 | 513.317 | 597.319 | 672.296 <sup>+2</sup> | 794.345 <sup>+2</sup> | 812.870 <sup>+2</sup> | 843.853 | 1039.429 |
|-------------------------|--------|--------|--------|---------|---------|---------|---------|---------|----------------------|---------|---------|---------|---------|---------|---------|---------|---------|---------|---------|---------|-----------------------|-----------------------|-----------------------|---------|----------|
| Frac. Inten. (% of TIC) | 0.01   | 0.23   | 0.35   | 4.68    | 2.78    | 2.28    | 2.82    | 2.48    | 7.40                 | 26.82   | 3.89    | 3.84    | 3.07    | 2.72    | 2.55    | 2.41    | 3.74    | 2.24    | 4.84    | 2.59    | 2.52                  | 6.95                  | 4.33                  | 2.44    | 2.82     |
| Rel. Inten. (% of BP)   | 0.03   | 0.88   | 1.31   | 17.27   | 10.49   | 8.81    | 10.83   | 9.28    | 27.80                | 100.00  | 14.87   | 14.49   | 11.56   | 10.24   | 9.81    | 9.10    | 14.10   | 8.48    | 17.48   | 9.78    | 9.52                  | 26.22                 | 16.34                 | 9.19    | 9.88     |
| Score                   | 0.20   | 0.50   | 0.22   | 0.50    | 1.50    | 0.75    | -0.11   | -0.09   | 0.50                 | 1.50    | -0.15   | 0.75    | -0.12   | 0.75    | -0.10   | -0.09   | 1.50    | 0.50    | 0.75    | -0.10   | -0.10                 | 1.50                  | -0.16                 | -0.09   | -0.10    |
| Ion-type                | PR     | V      | LI     | AL-28   | y1      | AL      |         |         | LTA-H <sub>2</sub> O | y2      | LTA     | SEQ     |         |         |         |         | ya      | b++8    | LTAVQ   |         |                       | y17 <sup>+2</sup>     |                       |         |          |
| Delta ppm               | -3.2   | -3.8   | -3.8   | -15.5   | -24.9   | 10.0    |         |         | -13.7                | 6.6     |         | 1.8     |         | -3.7    |         |         | 13.9    | -31.5   | 23.9    |         |                       | -33.0                 |                       |         |          |

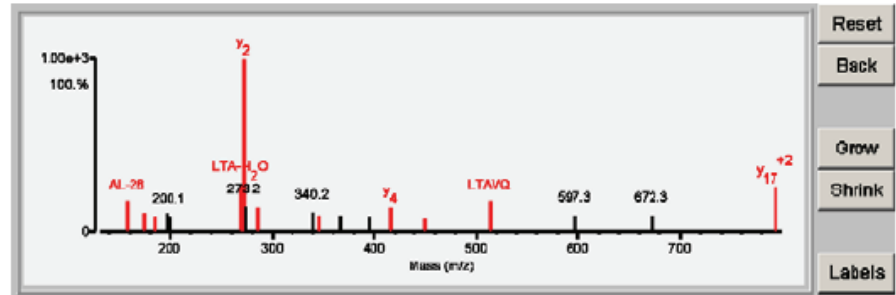

191

Detailed Results

| Rank                                                                                                                                                                                                                                                                                                                                                                                                                                                                                                                                                                                                                                                                                                                                                                                                                                                                                                                                                                                                                                                                                                                                                                                                                                                                                                                                                                                                                                                                                                                                                                                                                                                                                                                                                                                                                                                                                                                                                                                                                                                                                                                                                                                                                                                                                                                                                                                                                                                                                                                  | Score  | SP1 (%) | BC8     | # Unmatched Ions | Sequence                                                | MH <sup>+</sup> Calculated (Da) | MH <sup>+</sup> Error (Da) | MH <sup>+</sup> Error (ppm) | Protein MW (kDa) | Species | Accession #      | M8-Digest Index # | Protein Name                                                                    |                    |         |         |         |         |         |          |          |          |          |          |          |         |         |         |         |         |         |         |         |          |          |          |          |          |          |                         |      |      |      |      |      |      |      |      |      |      |      |      |      |      |      |      |       |      |      |      |      |      |      |      |      |                       |      |       |       |       |       |       |       |       |       |       |       |       |       |       |      |       |        |      |       |       |       |       |       |       |       |       |      |      |      |      |      |      |      |      |      |      |      |      |      |       |      |      |      |       |      |      |      |      |      |      |      |          |   |    |    |    |    |     |    |    |    |    |    |    |    |    |    |    |    |    |    |     |     |     |     |     |  |           |       |      |     |      |     |      |     |       |      |     |      |      |      |  |     |      |      |  |       |      |      |      |      |      |       |
|-----------------------------------------------------------------------------------------------------------------------------------------------------------------------------------------------------------------------------------------------------------------------------------------------------------------------------------------------------------------------------------------------------------------------------------------------------------------------------------------------------------------------------------------------------------------------------------------------------------------------------------------------------------------------------------------------------------------------------------------------------------------------------------------------------------------------------------------------------------------------------------------------------------------------------------------------------------------------------------------------------------------------------------------------------------------------------------------------------------------------------------------------------------------------------------------------------------------------------------------------------------------------------------------------------------------------------------------------------------------------------------------------------------------------------------------------------------------------------------------------------------------------------------------------------------------------------------------------------------------------------------------------------------------------------------------------------------------------------------------------------------------------------------------------------------------------------------------------------------------------------------------------------------------------------------------------------------------------------------------------------------------------------------------------------------------------------------------------------------------------------------------------------------------------------------------------------------------------------------------------------------------------------------------------------------------------------------------------------------------------------------------------------------------------------------------------------------------------------------------------------------------------|--------|---------|---------|------------------|---------------------------------------------------------|---------------------------------|----------------------------|-----------------------------|------------------|---------|------------------|-------------------|---------------------------------------------------------------------------------|--------------------|---------|---------|---------|---------|---------|----------|----------|----------|----------|----------|----------|---------|---------|---------|---------|---------|---------|---------|---------|----------|----------|----------|----------|----------|----------|-------------------------|------|------|------|------|------|------|------|------|------|------|------|------|------|------|------|------|-------|------|------|------|------|------|------|------|------|-----------------------|------|-------|-------|-------|-------|-------|-------|-------|-------|-------|-------|-------|-------|-------|------|-------|--------|------|-------|-------|-------|-------|-------|-------|-------|-------|------|------|------|------|------|------|------|------|------|------|------|------|------|-------|------|------|------|-------|------|------|------|------|------|------|------|----------|---|----|----|----|----|-----|----|----|----|----|----|----|----|----|----|----|----|----|----|-----|-----|-----|-----|-----|--|-----------|-------|------|-----|------|-----|------|-----|-------|------|-----|------|------|------|--|-----|------|------|--|-------|------|------|------|------|------|-------|
| 1                                                                                                                                                                                                                                                                                                                                                                                                                                                                                                                                                                                                                                                                                                                                                                                                                                                                                                                                                                                                                                                                                                                                                                                                                                                                                                                                                                                                                                                                                                                                                                                                                                                                                                                                                                                                                                                                                                                                                                                                                                                                                                                                                                                                                                                                                                                                                                                                                                                                                                                     | 23.68  | 87.8    | 16      | 2/25             | (G) D V Y C Q D V C I I Q M V I T D L I Q T A V Y R (T) | 2126.8386                       | 0.0058                     | 2.7                         | 58113.1/5.07     | HUMAN   | P07802<br>683787 | 683787            | Proactivator polypeptide precursor [Contains: Saposin-A - Homo sapiens (Human)] |                    |         |         |         |         |         |          |          |          |          |          |          |         |         |         |         |         |         |         |         |          |          |          |          |          |          |                         |      |      |      |      |      |      |      |      |      |      |      |      |      |      |      |      |       |      |      |      |      |      |      |      |      |                       |      |       |       |       |       |       |       |       |       |       |       |       |       |       |      |       |        |      |       |       |       |       |       |       |       |       |      |      |      |      |      |      |      |      |      |      |      |      |      |       |      |      |      |       |      |      |      |      |      |      |      |          |   |    |    |    |    |     |    |    |    |    |    |    |    |    |    |    |    |    |    |     |     |     |     |     |  |           |       |      |     |      |     |      |     |       |      |     |      |      |      |  |     |      |      |  |       |      |      |      |      |      |       |
| <table border="1"> <thead> <tr> <th>Fragment-Ion (m/z)</th> <th>72.079</th> <th>175.119</th> <th>274.190</th> <th>303.100</th> <th>346.228</th> <th>347.101</th> <th>408.113</th> <th>448.287</th> <th>574.329</th> <th>648.199</th> <th>687.410</th> <th>752.202</th> <th>802.437</th> <th>831.286</th> <th>837.300</th> <th>866.289</th> <th>903.484</th> <th>908.813</th> <th>983.330</th> <th>1002.651</th> <th>1124.387</th> <th>1183.590</th> <th>1223.454</th> <th>1281.861</th> <th>1374.722</th> </tr> </thead> <tbody> <tr> <td>Frag. Inten. (% of TIC)</td> <td>0.04</td> <td>5.39</td> <td>2.15</td> <td>3.25</td> <td>3.04</td> <td>2.05</td> <td>1.53</td> <td>5.72</td> <td>6.34</td> <td>2.23</td> <td>1.82</td> <td>8.41</td> <td>4.89</td> <td>1.27</td> <td>0.98</td> <td>8.28</td> <td>11.69</td> <td>0.92</td> <td>1.73</td> <td>5.86</td> <td>6.18</td> <td>5.22</td> <td>3.89</td> <td>5.94</td> <td>1.17</td> </tr> <tr> <td>Rel. Inten. (% of BP)</td> <td>0.37</td> <td>46.07</td> <td>18.37</td> <td>27.79</td> <td>26.02</td> <td>17.54</td> <td>13.05</td> <td>48.89</td> <td>54.21</td> <td>19.09</td> <td>15.60</td> <td>71.95</td> <td>41.84</td> <td>10.88</td> <td>8.34</td> <td>70.76</td> <td>100.00</td> <td>7.88</td> <td>14.80</td> <td>50.11</td> <td>52.82</td> <td>44.65</td> <td>33.30</td> <td>50.76</td> <td>10.01</td> </tr> <tr> <td>Score</td> <td>0.50</td> <td>1.50</td> <td>1.50</td> <td>0.50</td> <td>1.50</td> <td>0.75</td> <td>0.50</td> <td>1.50</td> <td>1.50</td> <td>0.50</td> <td>1.50</td> <td>0.50</td> <td>1.50</td> <td>-0.11</td> <td>0.50</td> <td>0.50</td> <td>1.50</td> <td>-0.08</td> <td>0.50</td> <td>1.50</td> <td>0.50</td> <td>1.50</td> <td>0.50</td> <td>1.50</td> <td>1.50</td> </tr> <tr> <td>Ion-type</td> <td>V</td> <td>Y1</td> <td>Y2</td> <td>b2</td> <td>Y3</td> <td>QDC</td> <td>b3</td> <td>Y4</td> <td>Y5</td> <td>b5</td> <td>Y5</td> <td>b6</td> <td>Y7</td> <td>a7</td> <td>b7</td> <td>Y8</td> <td>b8</td> <td>Y9</td> <td>b9</td> <td>Y10</td> <td>b10</td> <td>Y11</td> <td>b11</td> <td>Y12</td> <td></td> </tr> <tr> <td>Delta ppm</td> <td>-27.4</td> <td>-1.4</td> <td>8.9</td> <td>-5.3</td> <td>4.4</td> <td>-4.5</td> <td>4.7</td> <td>-10.4</td> <td>-3.7</td> <td>3.2</td> <td>-7.0</td> <td>-5.7</td> <td>-5.4</td> <td></td> <td>5.7</td> <td>-1.4</td> <td>-6.6</td> <td></td> <td>-19.2</td> <td>-6.5</td> <td>-1.7</td> <td>-7.3</td> <td>-2.8</td> <td>-4.9</td> <td>-13.9</td> </tr> </tbody> </table> |        |         |         |                  |                                                         |                                 |                            |                             |                  |         |                  |                   |                                                                                 | Fragment-Ion (m/z) | 72.079  | 175.119 | 274.190 | 303.100 | 346.228 | 347.101  | 408.113  | 448.287  | 574.329  | 648.199  | 687.410  | 752.202 | 802.437 | 831.286 | 837.300 | 866.289 | 903.484 | 908.813 | 983.330 | 1002.651 | 1124.387 | 1183.590 | 1223.454 | 1281.861 | 1374.722 | Frag. Inten. (% of TIC) | 0.04 | 5.39 | 2.15 | 3.25 | 3.04 | 2.05 | 1.53 | 5.72 | 6.34 | 2.23 | 1.82 | 8.41 | 4.89 | 1.27 | 0.98 | 8.28 | 11.69 | 0.92 | 1.73 | 5.86 | 6.18 | 5.22 | 3.89 | 5.94 | 1.17 | Rel. Inten. (% of BP) | 0.37 | 46.07 | 18.37 | 27.79 | 26.02 | 17.54 | 13.05 | 48.89 | 54.21 | 19.09 | 15.60 | 71.95 | 41.84 | 10.88 | 8.34 | 70.76 | 100.00 | 7.88 | 14.80 | 50.11 | 52.82 | 44.65 | 33.30 | 50.76 | 10.01 | Score | 0.50 | 1.50 | 1.50 | 0.50 | 1.50 | 0.75 | 0.50 | 1.50 | 1.50 | 0.50 | 1.50 | 0.50 | 1.50 | -0.11 | 0.50 | 0.50 | 1.50 | -0.08 | 0.50 | 1.50 | 0.50 | 1.50 | 0.50 | 1.50 | 1.50 | Ion-type | V | Y1 | Y2 | b2 | Y3 | QDC | b3 | Y4 | Y5 | b5 | Y5 | b6 | Y7 | a7 | b7 | Y8 | b8 | Y9 | b9 | Y10 | b10 | Y11 | b11 | Y12 |  | Delta ppm | -27.4 | -1.4 | 8.9 | -5.3 | 4.4 | -4.5 | 4.7 | -10.4 | -3.7 | 3.2 | -7.0 | -5.7 | -5.4 |  | 5.7 | -1.4 | -6.6 |  | -19.2 | -6.5 | -1.7 | -7.3 | -2.8 | -4.9 | -13.9 |
| Fragment-Ion (m/z)                                                                                                                                                                                                                                                                                                                                                                                                                                                                                                                                                                                                                                                                                                                                                                                                                                                                                                                                                                                                                                                                                                                                                                                                                                                                                                                                                                                                                                                                                                                                                                                                                                                                                                                                                                                                                                                                                                                                                                                                                                                                                                                                                                                                                                                                                                                                                                                                                                                                                                    | 72.079 | 175.119 | 274.190 | 303.100          | 346.228                                                 | 347.101                         | 408.113                    | 448.287                     | 574.329          | 648.199 | 687.410          | 752.202           | 802.437                                                                         | 831.286            | 837.300 | 866.289 | 903.484 | 908.813 | 983.330 | 1002.651 | 1124.387 | 1183.590 | 1223.454 | 1281.861 | 1374.722 |         |         |         |         |         |         |         |         |          |          |          |          |          |          |                         |      |      |      |      |      |      |      |      |      |      |      |      |      |      |      |      |       |      |      |      |      |      |      |      |      |                       |      |       |       |       |       |       |       |       |       |       |       |       |       |       |      |       |        |      |       |       |       |       |       |       |       |       |      |      |      |      |      |      |      |      |      |      |      |      |      |       |      |      |      |       |      |      |      |      |      |      |      |          |   |    |    |    |    |     |    |    |    |    |    |    |    |    |    |    |    |    |    |     |     |     |     |     |  |           |       |      |     |      |     |      |     |       |      |     |      |      |      |  |     |      |      |  |       |      |      |      |      |      |       |
| Frag. Inten. (% of TIC)                                                                                                                                                                                                                                                                                                                                                                                                                                                                                                                                                                                                                                                                                                                                                                                                                                                                                                                                                                                                                                                                                                                                                                                                                                                                                                                                                                                                                                                                                                                                                                                                                                                                                                                                                                                                                                                                                                                                                                                                                                                                                                                                                                                                                                                                                                                                                                                                                                                                                               | 0.04   | 5.39    | 2.15    | 3.25             | 3.04                                                    | 2.05                            | 1.53                       | 5.72                        | 6.34             | 2.23    | 1.82             | 8.41              | 4.89                                                                            | 1.27               | 0.98    | 8.28    | 11.69   | 0.92    | 1.73    | 5.86     | 6.18     | 5.22     | 3.89     | 5.94     | 1.17     |         |         |         |         |         |         |         |         |          |          |          |          |          |          |                         |      |      |      |      |      |      |      |      |      |      |      |      |      |      |      |      |       |      |      |      |      |      |      |      |      |                       |      |       |       |       |       |       |       |       |       |       |       |       |       |       |      |       |        |      |       |       |       |       |       |       |       |       |      |      |      |      |      |      |      |      |      |      |      |      |      |       |      |      |      |       |      |      |      |      |      |      |      |          |   |    |    |    |    |     |    |    |    |    |    |    |    |    |    |    |    |    |    |     |     |     |     |     |  |           |       |      |     |      |     |      |     |       |      |     |      |      |      |  |     |      |      |  |       |      |      |      |      |      |       |
| Rel. Inten. (% of BP)                                                                                                                                                                                                                                                                                                                                                                                                                                                                                                                                                                                                                                                                                                                                                                                                                                                                                                                                                                                                                                                                                                                                                                                                                                                                                                                                                                                                                                                                                                                                                                                                                                                                                                                                                                                                                                                                                                                                                                                                                                                                                                                                                                                                                                                                                                                                                                                                                                                                                                 | 0.37   | 46.07   | 18.37   | 27.79            | 26.02                                                   | 17.54                           | 13.05                      | 48.89                       | 54.21            | 19.09   | 15.60            | 71.95             | 41.84                                                                           | 10.88              | 8.34    | 70.76   | 100.00  | 7.88    | 14.80   | 50.11    | 52.82    | 44.65    | 33.30    | 50.76    | 10.01    |         |         |         |         |         |         |         |         |          |          |          |          |          |          |                         |      |      |      |      |      |      |      |      |      |      |      |      |      |      |      |      |       |      |      |      |      |      |      |      |      |                       |      |       |       |       |       |       |       |       |       |       |       |       |       |       |      |       |        |      |       |       |       |       |       |       |       |       |      |      |      |      |      |      |      |      |      |      |      |      |      |       |      |      |      |       |      |      |      |      |      |      |      |          |   |    |    |    |    |     |    |    |    |    |    |    |    |    |    |    |    |    |    |     |     |     |     |     |  |           |       |      |     |      |     |      |     |       |      |     |      |      |      |  |     |      |      |  |       |      |      |      |      |      |       |
| Score                                                                                                                                                                                                                                                                                                                                                                                                                                                                                                                                                                                                                                                                                                                                                                                                                                                                                                                                                                                                                                                                                                                                                                                                                                                                                                                                                                                                                                                                                                                                                                                                                                                                                                                                                                                                                                                                                                                                                                                                                                                                                                                                                                                                                                                                                                                                                                                                                                                                                                                 | 0.50   | 1.50    | 1.50    | 0.50             | 1.50                                                    | 0.75                            | 0.50                       | 1.50                        | 1.50             | 0.50    | 1.50             | 0.50              | 1.50                                                                            | -0.11              | 0.50    | 0.50    | 1.50    | -0.08   | 0.50    | 1.50     | 0.50     | 1.50     | 0.50     | 1.50     | 1.50     |         |         |         |         |         |         |         |         |          |          |          |          |          |          |                         |      |      |      |      |      |      |      |      |      |      |      |      |      |      |      |      |       |      |      |      |      |      |      |      |      |                       |      |       |       |       |       |       |       |       |       |       |       |       |       |       |      |       |        |      |       |       |       |       |       |       |       |       |      |      |      |      |      |      |      |      |      |      |      |      |      |       |      |      |      |       |      |      |      |      |      |      |      |          |   |    |    |    |    |     |    |    |    |    |    |    |    |    |    |    |    |    |    |     |     |     |     |     |  |           |       |      |     |      |     |      |     |       |      |     |      |      |      |  |     |      |      |  |       |      |      |      |      |      |       |
| Ion-type                                                                                                                                                                                                                                                                                                                                                                                                                                                                                                                                                                                                                                                                                                                                                                                                                                                                                                                                                                                                                                                                                                                                                                                                                                                                                                                                                                                                                                                                                                                                                                                                                                                                                                                                                                                                                                                                                                                                                                                                                                                                                                                                                                                                                                                                                                                                                                                                                                                                                                              | V      | Y1      | Y2      | b2               | Y3                                                      | QDC                             | b3                         | Y4                          | Y5               | b5      | Y5               | b6                | Y7                                                                              | a7                 | b7      | Y8      | b8      | Y9      | b9      | Y10      | b10      | Y11      | b11      | Y12      |          |         |         |         |         |         |         |         |         |          |          |          |          |          |          |                         |      |      |      |      |      |      |      |      |      |      |      |      |      |      |      |      |       |      |      |      |      |      |      |      |      |                       |      |       |       |       |       |       |       |       |       |       |       |       |       |       |      |       |        |      |       |       |       |       |       |       |       |       |      |      |      |      |      |      |      |      |      |      |      |      |      |       |      |      |      |       |      |      |      |      |      |      |      |          |   |    |    |    |    |     |    |    |    |    |    |    |    |    |    |    |    |    |    |     |     |     |     |     |  |           |       |      |     |      |     |      |     |       |      |     |      |      |      |  |     |      |      |  |       |      |      |      |      |      |       |
| Delta ppm                                                                                                                                                                                                                                                                                                                                                                                                                                                                                                                                                                                                                                                                                                                                                                                                                                                                                                                                                                                                                                                                                                                                                                                                                                                                                                                                                                                                                                                                                                                                                                                                                                                                                                                                                                                                                                                                                                                                                                                                                                                                                                                                                                                                                                                                                                                                                                                                                                                                                                             | -27.4  | -1.4    | 8.9     | -5.3             | 4.4                                                     | -4.5                            | 4.7                        | -10.4                       | -3.7             | 3.2     | -7.0             | -5.7              | -5.4                                                                            |                    | 5.7     | -1.4    | -6.6    |         | -19.2   | -6.5     | -1.7     | -7.3     | -2.8     | -4.9     | -13.9    |         |         |         |         |         |         |         |         |          |          |          |          |          |          |                         |      |      |      |      |      |      |      |      |      |      |      |      |      |      |      |      |       |      |      |      |      |      |      |      |      |                       |      |       |       |       |       |       |       |       |       |       |       |       |       |       |      |       |        |      |       |       |       |       |       |       |       |       |      |      |      |      |      |      |      |      |      |      |      |      |      |       |      |      |      |       |      |      |      |      |      |      |      |          |   |    |    |    |    |     |    |    |    |    |    |    |    |    |    |    |    |    |    |     |     |     |     |     |  |           |       |      |     |      |     |      |     |       |      |     |      |      |      |  |     |      |      |  |       |      |      |      |      |      |       |

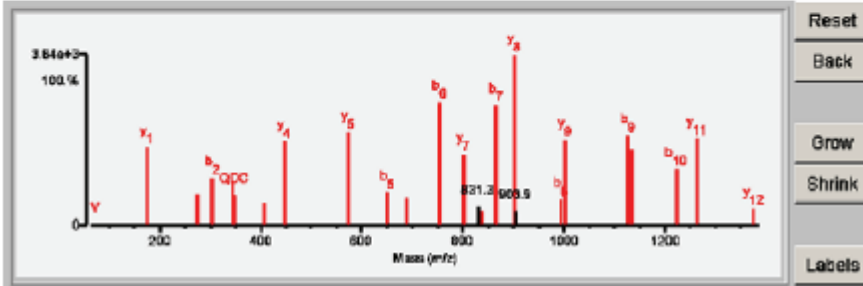

192

Detailed Results

| Rank                                                                                                                                                                                                                                                                                                                                                                                                                                                                                                                                                                                                                                                                                                                                                                                                                                                                                                                                                                                                                                                                                                                                                                                                                                                                                                                                                                                                                                                                                                                                                                                                                                                                                                                                                                                                                                                                                                                                                                                                                                                                                                                                                                                                                                                                                                                                                                                                                                                                                                                 | Score  | SP1 (%) | BC8     | # Unmatched Ions | Sequence                                  | MH <sup>+</sup> Calculated (Da) | MH <sup>+</sup> Error (Da) | MH <sup>+</sup> Error (ppm) | Protein MW (kDa) | Species | Accession #      | M8-Digest Index # | Protein Name                                                          |                    |         |         |         |         |         |         |         |         |         |          |          |         |         |         |         |         |         |         |         |         |         |         |         |          |          |                         |      |      |      |      |      |      |      |      |      |      |      |      |      |      |      |      |      |      |      |      |      |       |       |      |      |                       |      |      |       |      |      |      |      |      |       |       |       |      |      |      |       |      |       |       |       |       |       |        |       |       |       |       |      |       |      |      |      |      |      |      |       |       |      |       |      |       |      |      |      |      |      |      |      |      |      |      |       |          |    |       |    |    |        |    |    |        |    |    |        |    |        |    |    |        |    |    |    |    |        |    |    |    |     |           |      |  |      |      |       |      |       |       |  |  |      |  |      |  |       |       |      |      |      |      |       |      |      |      |
|----------------------------------------------------------------------------------------------------------------------------------------------------------------------------------------------------------------------------------------------------------------------------------------------------------------------------------------------------------------------------------------------------------------------------------------------------------------------------------------------------------------------------------------------------------------------------------------------------------------------------------------------------------------------------------------------------------------------------------------------------------------------------------------------------------------------------------------------------------------------------------------------------------------------------------------------------------------------------------------------------------------------------------------------------------------------------------------------------------------------------------------------------------------------------------------------------------------------------------------------------------------------------------------------------------------------------------------------------------------------------------------------------------------------------------------------------------------------------------------------------------------------------------------------------------------------------------------------------------------------------------------------------------------------------------------------------------------------------------------------------------------------------------------------------------------------------------------------------------------------------------------------------------------------------------------------------------------------------------------------------------------------------------------------------------------------------------------------------------------------------------------------------------------------------------------------------------------------------------------------------------------------------------------------------------------------------------------------------------------------------------------------------------------------------------------------------------------------------------------------------------------------|--------|---------|---------|------------------|-------------------------------------------|---------------------------------|----------------------------|-----------------------------|------------------|---------|------------------|-------------------|-----------------------------------------------------------------------|--------------------|---------|---------|---------|---------|---------|---------|---------|---------|---------|----------|----------|---------|---------|---------|---------|---------|---------|---------|---------|---------|---------|---------|---------|----------|----------|-------------------------|------|------|------|------|------|------|------|------|------|------|------|------|------|------|------|------|------|------|------|------|------|-------|-------|------|------|-----------------------|------|------|-------|------|------|------|------|------|-------|-------|-------|------|------|------|-------|------|-------|-------|-------|-------|-------|--------|-------|-------|-------|-------|------|-------|------|------|------|------|------|------|-------|-------|------|-------|------|-------|------|------|------|------|------|------|------|------|------|------|-------|----------|----|-------|----|----|--------|----|----|--------|----|----|--------|----|--------|----|----|--------|----|----|----|----|--------|----|----|----|-----|-----------|------|--|------|------|-------|------|-------|-------|--|--|------|--|------|--|-------|-------|------|------|------|------|-------|------|------|------|
| 1                                                                                                                                                                                                                                                                                                                                                                                                                                                                                                                                                                                                                                                                                                                                                                                                                                                                                                                                                                                                                                                                                                                                                                                                                                                                                                                                                                                                                                                                                                                                                                                                                                                                                                                                                                                                                                                                                                                                                                                                                                                                                                                                                                                                                                                                                                                                                                                                                                                                                                                    | 14.82  | 84.6    | 8       | 8/25             | (R) E L S V E I L I V I Y T D V L D R (S) | 1838.7884                       | -0.0010                    | -0.8                        | 20894.8/5.37     | HUMAN   | Q6WU38<br>398501 | 398501            | Proapoptotic caspase adapter protein precursor - Homo sapiens (Human) |                    |         |         |         |         |         |         |         |         |         |          |          |         |         |         |         |         |         |         |         |         |         |         |         |          |          |                         |      |      |      |      |      |      |      |      |      |      |      |      |      |      |      |      |      |      |      |      |      |       |       |      |      |                       |      |      |       |      |      |      |      |      |       |       |       |      |      |      |       |      |       |       |       |       |       |        |       |       |       |       |      |       |      |      |      |      |      |      |       |       |      |       |      |       |      |      |      |      |      |      |      |      |      |      |       |          |    |       |    |    |        |    |    |        |    |    |        |    |        |    |    |        |    |    |    |    |        |    |    |    |     |           |      |  |      |      |       |      |       |       |  |  |      |  |      |  |       |       |      |      |      |      |       |      |      |      |
| <table border="1"> <thead> <tr> <th>Fragment-Ion (m/z)</th> <th>88.098</th> <th>188.074</th> <th>215.138</th> <th>243.134</th> <th>280.143</th> <th>400.152</th> <th>409.223</th> <th>418.158</th> <th>428.185</th> <th>441.185</th> <th>628.183</th> <th>640.278</th> <th>647.204</th> <th>664.282</th> <th>617.318</th> <th>802.288</th> <th>842.279</th> <th>860.290</th> <th>718.388</th> <th>741.348</th> <th>759.360</th> <th>881.433</th> <th>860.502</th> <th>1093.587</th> <th>1397.864</th> </tr> </thead> <tbody> <tr> <td>Frag. Inten. (% of TIC)</td> <td>0.10</td> <td>2.06</td> <td>3.54</td> <td>2.32</td> <td>1.65</td> <td>2.22</td> <td>1.99</td> <td>1.91</td> <td>4.26</td> <td>3.15</td> <td>2.98</td> <td>1.51</td> <td>2.35</td> <td>1.93</td> <td>2.90</td> <td>1.83</td> <td>4.28</td> <td>3.93</td> <td>7.18</td> <td>2.48</td> <td>3.21</td> <td>23.91</td> <td>12.15</td> <td>3.52</td> <td>2.52</td> </tr> <tr> <td>Rel. Inten. (% of BP)</td> <td>0.42</td> <td>8.62</td> <td>14.78</td> <td>9.68</td> <td>6.88</td> <td>9.30</td> <td>8.32</td> <td>7.98</td> <td>17.81</td> <td>13.21</td> <td>12.47</td> <td>6.72</td> <td>9.84</td> <td>8.07</td> <td>12.14</td> <td>7.54</td> <td>17.92</td> <td>16.43</td> <td>30.03</td> <td>10.39</td> <td>13.42</td> <td>100.00</td> <td>50.79</td> <td>14.73</td> <td>10.56</td> </tr> <tr> <td>Score</td> <td>0.22</td> <td>-0.09</td> <td>0.50</td> <td>0.75</td> <td>1.50</td> <td>0.25</td> <td>1.50</td> <td>0.50</td> <td>-0.18</td> <td>-0.13</td> <td>0.25</td> <td>-0.07</td> <td>0.50</td> <td>-0.08</td> <td>1.50</td> <td>0.50</td> <td>0.25</td> <td>0.50</td> <td>1.50</td> <td>0.25</td> <td>0.50</td> <td>1.50</td> <td>1.50</td> <td>1.50</td> <td>-0.11</td> </tr> <tr> <td>Ion-type</td> <td>LI</td> <td>EL-28</td> <td>EL</td> <td>Y2</td> <td>b3-H2O</td> <td>Y3</td> <td>b3</td> <td>b4-H2O</td> <td>b4</td> <td>Y5</td> <td>b5-H2O</td> <td>b5</td> <td>b6-H2O</td> <td>b6</td> <td>Y6</td> <td>b6-H2O</td> <td>b6</td> <td>Y7</td> <td>b7</td> <td>Y8</td> <td>b8-H2O</td> <td>b8</td> <td>Y9</td> <td>b9</td> <td>Y10</td> </tr> <tr> <td>Delta ppm</td> <td>-2.6</td> <td></td> <td>-8.9</td> <td>-3.8</td> <td>-11.0</td> <td>-7.2</td> <td>-17.5</td> <td>-17.6</td> <td></td> <td></td> <td>-9.2</td> <td></td> <td>-6.8</td> <td></td> <td>-10.1</td> <td>-15.0</td> <td>-3.5</td> <td>-3.6</td> <td>-7.2</td> <td>-4.5</td> <td>-13.2</td> <td>-3.3</td> <td>-2.4</td> <td>-1.6</td> </tr> </tbody> </table> |        |         |         |                  |                                           |                                 |                            |                             |                  |         |                  |                   |                                                                       | Fragment-Ion (m/z) | 88.098  | 188.074 | 215.138 | 243.134 | 280.143 | 400.152 | 409.223 | 418.158 | 428.185 | 441.185  | 628.183  | 640.278 | 647.204 | 664.282 | 617.318 | 802.288 | 842.279 | 860.290 | 718.388 | 741.348 | 759.360 | 881.433 | 860.502 | 1093.587 | 1397.864 | Frag. Inten. (% of TIC) | 0.10 | 2.06 | 3.54 | 2.32 | 1.65 | 2.22 | 1.99 | 1.91 | 4.26 | 3.15 | 2.98 | 1.51 | 2.35 | 1.93 | 2.90 | 1.83 | 4.28 | 3.93 | 7.18 | 2.48 | 3.21 | 23.91 | 12.15 | 3.52 | 2.52 | Rel. Inten. (% of BP) | 0.42 | 8.62 | 14.78 | 9.68 | 6.88 | 9.30 | 8.32 | 7.98 | 17.81 | 13.21 | 12.47 | 6.72 | 9.84 | 8.07 | 12.14 | 7.54 | 17.92 | 16.43 | 30.03 | 10.39 | 13.42 | 100.00 | 50.79 | 14.73 | 10.56 | Score | 0.22 | -0.09 | 0.50 | 0.75 | 1.50 | 0.25 | 1.50 | 0.50 | -0.18 | -0.13 | 0.25 | -0.07 | 0.50 | -0.08 | 1.50 | 0.50 | 0.25 | 0.50 | 1.50 | 0.25 | 0.50 | 1.50 | 1.50 | 1.50 | -0.11 | Ion-type | LI | EL-28 | EL | Y2 | b3-H2O | Y3 | b3 | b4-H2O | b4 | Y5 | b5-H2O | b5 | b6-H2O | b6 | Y6 | b6-H2O | b6 | Y7 | b7 | Y8 | b8-H2O | b8 | Y9 | b9 | Y10 | Delta ppm | -2.6 |  | -8.9 | -3.8 | -11.0 | -7.2 | -17.5 | -17.6 |  |  | -9.2 |  | -6.8 |  | -10.1 | -15.0 | -3.5 | -3.6 | -7.2 | -4.5 | -13.2 | -3.3 | -2.4 | -1.6 |
| Fragment-Ion (m/z)                                                                                                                                                                                                                                                                                                                                                                                                                                                                                                                                                                                                                                                                                                                                                                                                                                                                                                                                                                                                                                                                                                                                                                                                                                                                                                                                                                                                                                                                                                                                                                                                                                                                                                                                                                                                                                                                                                                                                                                                                                                                                                                                                                                                                                                                                                                                                                                                                                                                                                   | 88.098 | 188.074 | 215.138 | 243.134          | 280.143                                   | 400.152                         | 409.223                    | 418.158                     | 428.185          | 441.185 | 628.183          | 640.278           | 647.204                                                               | 664.282            | 617.318 | 802.288 | 842.279 | 860.290 | 718.388 | 741.348 | 759.360 | 881.433 | 860.502 | 1093.587 | 1397.864 |         |         |         |         |         |         |         |         |         |         |         |         |          |          |                         |      |      |      |      |      |      |      |      |      |      |      |      |      |      |      |      |      |      |      |      |      |       |       |      |      |                       |      |      |       |      |      |      |      |      |       |       |       |      |      |      |       |      |       |       |       |       |       |        |       |       |       |       |      |       |      |      |      |      |      |      |       |       |      |       |      |       |      |      |      |      |      |      |      |      |      |      |       |          |    |       |    |    |        |    |    |        |    |    |        |    |        |    |    |        |    |    |    |    |        |    |    |    |     |           |      |  |      |      |       |      |       |       |  |  |      |  |      |  |       |       |      |      |      |      |       |      |      |      |
| Frag. Inten. (% of TIC)                                                                                                                                                                                                                                                                                                                                                                                                                                                                                                                                                                                                                                                                                                                                                                                                                                                                                                                                                                                                                                                                                                                                                                                                                                                                                                                                                                                                                                                                                                                                                                                                                                                                                                                                                                                                                                                                                                                                                                                                                                                                                                                                                                                                                                                                                                                                                                                                                                                                                              | 0.10   | 2.06    | 3.54    | 2.32             | 1.65                                      | 2.22                            | 1.99                       | 1.91                        | 4.26             | 3.15    | 2.98             | 1.51              | 2.35                                                                  | 1.93               | 2.90    | 1.83    | 4.28    | 3.93    | 7.18    | 2.48    | 3.21    | 23.91   | 12.15   | 3.52     | 2.52     |         |         |         |         |         |         |         |         |         |         |         |         |          |          |                         |      |      |      |      |      |      |      |      |      |      |      |      |      |      |      |      |      |      |      |      |      |       |       |      |      |                       |      |      |       |      |      |      |      |      |       |       |       |      |      |      |       |      |       |       |       |       |       |        |       |       |       |       |      |       |      |      |      |      |      |      |       |       |      |       |      |       |      |      |      |      |      |      |      |      |      |      |       |          |    |       |    |    |        |    |    |        |    |    |        |    |        |    |    |        |    |    |    |    |        |    |    |    |     |           |      |  |      |      |       |      |       |       |  |  |      |  |      |  |       |       |      |      |      |      |       |      |      |      |
| Rel. Inten. (% of BP)                                                                                                                                                                                                                                                                                                                                                                                                                                                                                                                                                                                                                                                                                                                                                                                                                                                                                                                                                                                                                                                                                                                                                                                                                                                                                                                                                                                                                                                                                                                                                                                                                                                                                                                                                                                                                                                                                                                                                                                                                                                                                                                                                                                                                                                                                                                                                                                                                                                                                                | 0.42   | 8.62    | 14.78   | 9.68             | 6.88                                      | 9.30                            | 8.32                       | 7.98                        | 17.81            | 13.21   | 12.47            | 6.72              | 9.84                                                                  | 8.07               | 12.14   | 7.54    | 17.92   | 16.43   | 30.03   | 10.39   | 13.42   | 100.00  | 50.79   | 14.73    | 10.56    |         |         |         |         |         |         |         |         |         |         |         |         |          |          |                         |      |      |      |      |      |      |      |      |      |      |      |      |      |      |      |      |      |      |      |      |      |       |       |      |      |                       |      |      |       |      |      |      |      |      |       |       |       |      |      |      |       |      |       |       |       |       |       |        |       |       |       |       |      |       |      |      |      |      |      |      |       |       |      |       |      |       |      |      |      |      |      |      |      |      |      |      |       |          |    |       |    |    |        |    |    |        |    |    |        |    |        |    |    |        |    |    |    |    |        |    |    |    |     |           |      |  |      |      |       |      |       |       |  |  |      |  |      |  |       |       |      |      |      |      |       |      |      |      |
| Score                                                                                                                                                                                                                                                                                                                                                                                                                                                                                                                                                                                                                                                                                                                                                                                                                                                                                                                                                                                                                                                                                                                                                                                                                                                                                                                                                                                                                                                                                                                                                                                                                                                                                                                                                                                                                                                                                                                                                                                                                                                                                                                                                                                                                                                                                                                                                                                                                                                                                                                | 0.22   | -0.09   | 0.50    | 0.75             | 1.50                                      | 0.25                            | 1.50                       | 0.50                        | -0.18            | -0.13   | 0.25             | -0.07             | 0.50                                                                  | -0.08              | 1.50    | 0.50    | 0.25    | 0.50    | 1.50    | 0.25    | 0.50    | 1.50    | 1.50    | 1.50     | -0.11    |         |         |         |         |         |         |         |         |         |         |         |         |          |          |                         |      |      |      |      |      |      |      |      |      |      |      |      |      |      |      |      |      |      |      |      |      |       |       |      |      |                       |      |      |       |      |      |      |      |      |       |       |       |      |      |      |       |      |       |       |       |       |       |        |       |       |       |       |      |       |      |      |      |      |      |      |       |       |      |       |      |       |      |      |      |      |      |      |      |      |      |      |       |          |    |       |    |    |        |    |    |        |    |    |        |    |        |    |    |        |    |    |    |    |        |    |    |    |     |           |      |  |      |      |       |      |       |       |  |  |      |  |      |  |       |       |      |      |      |      |       |      |      |      |
| Ion-type                                                                                                                                                                                                                                                                                                                                                                                                                                                                                                                                                                                                                                                                                                                                                                                                                                                                                                                                                                                                                                                                                                                                                                                                                                                                                                                                                                                                                                                                                                                                                                                                                                                                                                                                                                                                                                                                                                                                                                                                                                                                                                                                                                                                                                                                                                                                                                                                                                                                                                             | LI     | EL-28   | EL      | Y2               | b3-H2O                                    | Y3                              | b3                         | b4-H2O                      | b4               | Y5      | b5-H2O           | b5                | b6-H2O                                                                | b6                 | Y6      | b6-H2O  | b6      | Y7      | b7      | Y8      | b8-H2O  | b8      | Y9      | b9       | Y10      |         |         |         |         |         |         |         |         |         |         |         |         |          |          |                         |      |      |      |      |      |      |      |      |      |      |      |      |      |      |      |      |      |      |      |      |      |       |       |      |      |                       |      |      |       |      |      |      |      |      |       |       |       |      |      |      |       |      |       |       |       |       |       |        |       |       |       |       |      |       |      |      |      |      |      |      |       |       |      |       |      |       |      |      |      |      |      |      |      |      |      |      |       |          |    |       |    |    |        |    |    |        |    |    |        |    |        |    |    |        |    |    |    |    |        |    |    |    |     |           |      |  |      |      |       |      |       |       |  |  |      |  |      |  |       |       |      |      |      |      |       |      |      |      |
| Delta ppm                                                                                                                                                                                                                                                                                                                                                                                                                                                                                                                                                                                                                                                                                                                                                                                                                                                                                                                                                                                                                                                                                                                                                                                                                                                                                                                                                                                                                                                                                                                                                                                                                                                                                                                                                                                                                                                                                                                                                                                                                                                                                                                                                                                                                                                                                                                                                                                                                                                                                                            | -2.6   |         | -8.9    | -3.8             | -11.0                                     | -7.2                            | -17.5                      | -17.6                       |                  |         | -9.2             |                   | -6.8                                                                  |                    | -10.1   | -15.0   | -3.5    | -3.6    | -7.2    | -4.5    | -13.2   | -3.3    | -2.4    | -1.6     |          |         |         |         |         |         |         |         |         |         |         |         |         |          |          |                         |      |      |      |      |      |      |      |      |      |      |      |      |      |      |      |      |      |      |      |      |      |       |       |      |      |                       |      |      |       |      |      |      |      |      |       |       |       |      |      |      |       |      |       |       |       |       |       |        |       |       |       |       |      |       |      |      |      |      |      |      |       |       |      |       |      |       |      |      |      |      |      |      |      |      |      |      |       |          |    |       |    |    |        |    |    |        |    |    |        |    |        |    |    |        |    |    |    |    |        |    |    |    |     |           |      |  |      |      |       |      |       |       |  |  |      |  |      |  |       |       |      |      |      |      |       |      |      |      |

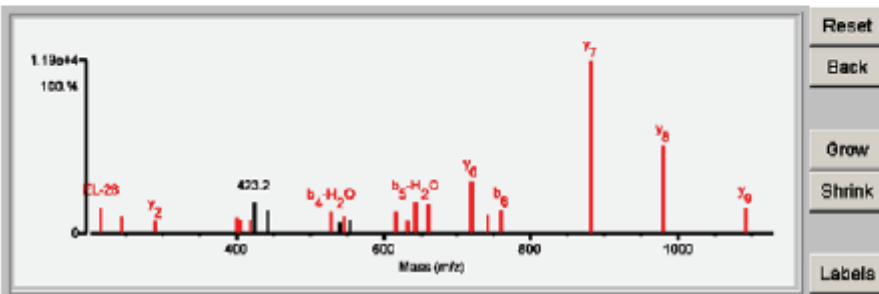

193

Detailed Results

| Rank | Score | SP1 (%) | BC8 | # Unmatched Ions | Sequence                              | MH <sup>+</sup> Calculated (Da) | MH <sup>+</sup> Error (Da) | MH <sup>+</sup> Error (ppm) | Protein MW/pi (Da) | Species | Accession # | M8-Digest Index # | Protein Name                      |         |           |                               |           |           |                |                |                               |                |                |                |         |                |                |                |                 |          |
|------|-------|---------|-----|------------------|---------------------------------------|---------------------------------|----------------------------|-----------------------------|--------------------|---------|-------------|-------------------|-----------------------------------|---------|-----------|-------------------------------|-----------|-----------|----------------|----------------|-------------------------------|----------------|----------------|----------------|---------|----------------|----------------|----------------|-----------------|----------|
| 1    | 14.83 | 63.8    | 8   | 8/26             | (N) I/T/P A E (V) G/V/L/V/G K D R (8) | 1879.8498                       | 0.0043                     | 2.5                         | 15064.3/8.44       | HUMAN   | P07737      | 436226            | Profilin-1 - Homo sapiens (Human) |         |           |                               |           |           |                |                |                               |                |                |                |         |                |                |                |                 |          |
|      |       |         |     |                  | Fragment-Ion (m/z)                    | 74.058                          | 298.141                    | 303.146                     | 387.208            | 517.218 | 663.288     | 800.273           | 810.282                           | 818.282 | 820.367*2 | 841.338*2                     | 870.374*2 | 887.882*2 | 891.858*2      | 898.331        | 708.346                       | 738.390*2      | 766.384        | 822.431        | 856.422 | 886.488        | 888.608        | 876.628        | 1077.674        | 1374.720 |
|      |       |         |     |                  | Frag. Inten. (% of TIC)               | 2.39                            | 4.72                       | 2.26                        | 2.36               | 2.23    | 2.08        | 3.26              | 4.97                              | 1.75    | 4.07      | 14.95                         | 1.84      | 13.97     | 6.87           | 2.35           | 3.36                          | 5.02           | 2.70           | 3.56           | 2.30    | 2.09           | 1.69           | 5.66           | 1.79            | 1.77     |
|      |       |         |     |                  | Rel. Inten. (% of BP)                 | 15.99                           | 31.57                      | 15.14                       | 15.76              | 14.94   | 13.91       | 21.82             | 33.27                             | 11.68   | 27.23     | 100.00                        | 12.32     | 93.45     | 45.95          | 15.69          | 22.47                         | 33.57          | 18.07          | 23.78          | 15.41   | 14.00          | 11.28          | 37.85          | 11.95           | 11.83    |
|      |       |         |     |                  | Score                                 | 0.75                            | 0.75                       | 0.50                        | 0.75               | -0.15   | 0.75        | 0.50              | 1.50                              | -0.12   | -0.27     | -1.00                         | -0.12     | 1.50      | -0.46          | 0.50           | 1.50                          | 0.50           | 1.50           | 0.50           | 1.50    | 0.50           | -0.14          | 0.50           | 1.50            | 1.50     |
|      |       |         |     |                  | Ion-type                              | PAE                             | PAE                        | b <sub>2</sub>              | PAEV               |         | PAEVGV      | b <sub>6</sub>    | y <sub>4</sub>                    |         |           | y <sub>12</sub> <sup>+2</sup> |           |           | b <sub>6</sub> | y <sub>5</sub> | y <sub>13</sub> <sup>+2</sup> | b <sub>7</sub> | y <sub>6</sub> | b <sub>8</sub> |         | b <sub>6</sub> | y <sub>8</sub> | y <sub>9</sub> | y <sub>12</sub> |          |
|      |       |         |     |                  | Delta ppm                             | 1.5                             | 22.8                       |                             | -8.0               |         | -5.5        | 2.9               | 8.2                               |         |           | -1.7                          |           | -12.3     | -0.1           |                | 3.7                           | 4.4            | 2.7            | -8.0           |         | -7.7           | 7.3            | -12.1          | 0.5             |          |

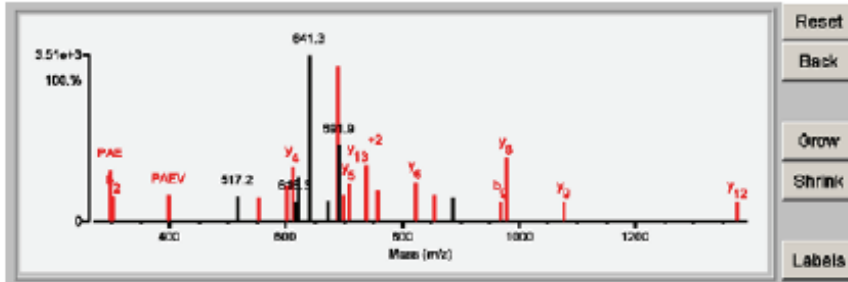

194

Detailed Results

| Rank | Score | SP1 (%) | BC8 | # Unmatched Ions | Sequence                        | MH <sup>+</sup> Calculated (Da) | MH <sup>+</sup> Error (Da) | MH <sup>+</sup> Error (ppm) | Protein MW/pi (Da) | Species | Accession #    | M8-Digest Index # | Protein Name                                  |                |                |                |                                  |                |                |                |                                  |                                  |                |                |                                  |                |                |                |                 |          |      |
|------|-------|---------|-----|------------------|---------------------------------|---------------------------------|----------------------------|-----------------------------|--------------------|---------|----------------|-------------------|-----------------------------------------------|----------------|----------------|----------------|----------------------------------|----------------|----------------|----------------|----------------------------------|----------------------------------|----------------|----------------|----------------------------------|----------------|----------------|----------------|-----------------|----------|------|
| 1    | 17.13 | 88.4    | 12  | 6/26             | (H) S/E/A/T/M/Q/I/R/E/L/L/R (Y) | 1623.7804                       | -0.0098                    | -0.8                        | 69271.8/4.27       | HUMAN   | Q16366         | 428583            | Protein phosphatase 1G - Homo sapiens (Human) |                |                |                |                                  |                |                |                |                                  |                                  |                |                |                                  |                |                |                |                 |          |      |
|      |       |         |     |                  | Fragment-Ion (m/z)              | 72.081                          | 88.088                     | 120.078                     | 138.078            | 168.084 | 176.117        | 218.048           | 278.184                                       | 347.091        | 388.260        | 418.127        | 501.187                          | 502.339        | 519.177        | 631.387        | 632.198                          | 733.243                          | 748.388        | 751.269        | 760.413                          | 848.338        | 879.488        | 874.663        | 1106.681        | 1208.822 |      |
|      |       |         |     |                  | Frag. Inten. (% of TIC)         | 4.37                            | 0.25                       | 2.13                        | 2.59               | 1.62    | 2.38           | 3.67              | 5.24                                          | 6.78           | 3.72           | 5.62           | 4.89                             | 3.41           | 4.39           | 2.08           | 5.56                             | 3.11                             | 2.87           | 1.57           | 8.34                             | 3.74           | 4.52           | 8.54           | 4.99            | 3.63     |      |
|      |       |         |     |                  | Rel. Inten. (% of BP)           | 51.19                           | 2.94                       | 24.89                       | 30.34              | 19.00   | 27.86          | 42.91             | 61.41                                         | 79.39          | 43.56          | 65.79          | 57.16                            | 39.90          | 51.44          | 24.41          | 65.06                            | 36.36                            | 33.57          | 18.41          | 97.60                            | 43.81          | 52.94          | 100.00         | 58.43           | 42.45    |      |
|      |       |         |     |                  | Score                           | -0.51                           | 0.22                       | -0.25                       | -0.30              | -0.19   | 1.50           | 0.50              | 1.50                                          | 0.50           | 1.50           | 0.50           | 0.25                             | 1.50           | 0.50           | 1.50           | 0.25                             | 0.25                             | 0.25           | -0.34          | 0.50                             | 1.50           | 0.25           | 1.50           | 1.50            | 1.50     | 1.50 |
|      |       |         |     |                  | Ion-type                        | LI                              |                            |                             |                    |         | y <sub>1</sub> | b <sub>1</sub>    | y <sub>2</sub>                                | b <sub>2</sub> | y <sub>3</sub> | b <sub>3</sub> | b <sub>4</sub> -H <sub>2</sub> O | y <sub>4</sub> | b <sub>4</sub> | y <sub>5</sub> | b <sub>5</sub> -H <sub>2</sub> O | b <sub>5</sub> -H <sub>2</sub> O | b <sub>6</sub> | y <sub>6</sub> | b <sub>7</sub> -H <sub>2</sub> O | y <sub>7</sub> | y <sub>8</sub> | y <sub>9</sub> | y <sub>10</sub> |          |      |
|      |       |         |     |                  | Delta ppm                       | -2.6                            |                            |                             |                    |         | -13.4          | -2.5              | -8.1                                          | -3.0           | -1.3           | -5.6           | 1.3                              | 8.4            | -0.3           | -16.9          | -17.0                            | -14.9                            |                | -7.7           | -9.3                             | -0.8           | -6.0           | 1.4            | -0.8            |          |      |

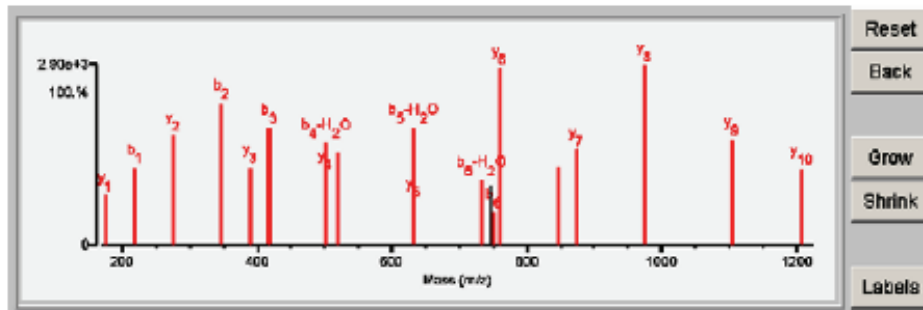

195

Detailed Results

| Rank | Score | SP1 (%) | BCS | Unmatched Ions | #                              | Sequence  | MH <sup>+</sup> Calculated (Da) | MH <sup>+</sup> Error (Da) | MH <sup>+</sup> Error (ppm) | Protein MW (Da) | Species | Accession # | MS-Digest Index #                  | Protein Name |
|------|-------|---------|-----|----------------|--------------------------------|-----------|---------------------------------|----------------------------|-----------------------------|-----------------|---------|-------------|------------------------------------|--------------|
| 1    | 16.16 | 84.6    | 8   | 825            | (F)YKHPQVRA(L)G/R/DKRLIHYLR(V) | 2708.2886 | 0.0125                          | 4.6                        | 33489.0423                  | HUMAN           | Q01105  | 592987      | Protein SET - Homo sapiens (Human) |              |

  

| Fragment-Ion (m/z)      | 72.080 | 88.098 | 87.097 | 89.080 | 102.064 | 133.088 | 187.088 | 278.111 | 368.980 <sup>+2</sup> | 481.127 | 562.311          | 628.787 <sup>+2</sup> | 868.511 <sup>+2</sup>                          | 888.324          | 888.822 | 743.842 <sup>+2</sup>                           | 762.842 <sup>+2</sup>         | 772.380 <sup>+2</sup>                           | 781.368 <sup>+2</sup>         | 816.422 | 837.880 <sup>+2</sup>         | 868.478          | 873.488          | 921.418          | 1084.506 |
|-------------------------|--------|--------|--------|--------|---------|---------|---------|---------|-----------------------|---------|------------------|-----------------------|------------------------------------------------|------------------|---------|-------------------------------------------------|-------------------------------|-------------------------------------------------|-------------------------------|---------|-------------------------------|------------------|------------------|------------------|----------|
| Frag. Inten. (% of TIC) | 0.12   | 0.60   | 2.36   | 1.65   | 0.08    | 2.23    | 2.33    | 1.72    | 3.06                  | 11.89   | 6.24             | 1.79                  | 3.75                                           | 1.72             | 27.09   | 2.51                                            | 3.75                          | 1.72                                            | 27.09                         | 2.51    | 7.93                          | 1.58             | 1.75             | 4.17             | 7.78     |
| Rel. Inten. (% of BP)   | 0.43   | 2.20   | 8.73   | 6.09   | 0.23    | 8.22    | 8.59    | 6.35    | 5.95                  | 5.99    | 9.59             | 11.30                 | 43.90                                          | 23.03            | 6.75    | 5.62                                            | 13.84                         | 6.35                                            | 100.00                        | 9.26    | 29.28                         | 5.83             | 6.49             | 15.41            | 28.70    |
| Score                   | 0.50   | 0.22   | -0.09  | -0.05  | 1.00    | -0.08   | 0.75    | -0.05   | -0.05                 | -0.06   | 1.50             | 1.50                  | 0.25                                           | 1.50             | -0.07   | 0.50                                            | 1.50                          | 0.50                                            | 1.50                          | -0.09   | 1.50                          | 0.50             | 1.50             | 0.50             | 0.50     |
| Ion-type                | V      | LI     |        |        | E       |         | OE      |         | YI                    |         | YI <sup>+2</sup> | YI <sup>+2</sup>      | b <sub>12</sub> -NH <sub>2</sub> <sup>+2</sup> | Y <sup>+11</sup> |         | YI <sub>2</sub> -H <sub>2</sub> O <sup>+2</sup> | YI <sub>2</sub> <sup>+2</sup> | YI <sub>3</sub> -H <sub>2</sub> O <sup>+2</sup> | YI <sub>3</sub> <sup>+2</sup> |         | YI <sub>4</sub> <sup>+2</sup> | YI <sup>+2</sup> | YI <sup>+2</sup> | YI <sup>+2</sup> |          |
| Delta ppm               | -13.5  | -4.9   |        |        | -12.3   |         | -25.4   |         | -4.7                  |         | -16.1            |                       | -12.9                                          | -5.2             |         | -2.9                                            | -9.2                          | 7.3                                             | -3.1                          |         | -11.2                         | 13.8             | -9.3             | -7.9             | -3.4     |

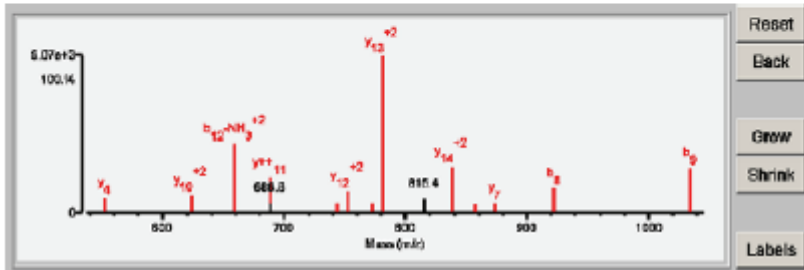

196

Detailed Results

| Rank | Score | SP1 (%) | BCS | Unmatched Ions | #                     | Sequence  | MH <sup>+</sup> Calculated (Da) | MH <sup>+</sup> Error (Da) | MH <sup>+</sup> Error (ppm) | Protein MW (Da) | Species | Accession # | MS-Digest Index #                                                  | Protein Name |
|------|-------|---------|-----|----------------|-----------------------|-----------|---------------------------------|----------------------------|-----------------------------|-----------------|---------|-------------|--------------------------------------------------------------------|--------------|
| 1    | 13.44 | 86.0    | 8   | 10/26          | (E)EVLIPR/YLNR/I/R(G) | 1484.7881 | 0.0108                          | 7.1                        | 47712.115.07                | HUMAN           | Q68FG1  | 252877      | Putative heat shock protein HSP 90-alpha A4 - Homo sapiens (Human) |              |
| 1    | 13.44 | 86.0    | 8   | 10/26          | (E)EVLIPR/YLNR/I/R(G) | 1484.7881 | 0.0108                          | 7.1                        | 84860.214.84                | HUMAN           | P07900  | 252888      | Heat shock protein HSP 90-alpha - Homo sapiens (Human)             |              |
| 1    | 13.44 | 86.0    | 8   | 10/26          | (D)EVLIPR/YLNR/I/R(G) | 1484.7881 | 0.0108                          | 7.1                        | 83284.814.97                | HUMAN           | P08238  | 252911      | Heat shock protein HSP 90-beta - Homo sapiens (Human)              |              |

  

| Fragment-Ion (m/z)      | 88.097 | 87.098 | 120.081 | 176.122 | 186.178 | 218.050        | 288.185        | 303.136        | 331.193        | 382.185 | 380.174 | 389.188 | 418.233        | 441.195 <sup>+2</sup> | 444.217        | 451.176 | 605.081 | 628.282 <sup>+2</sup>        | 682.828         | 683.224 | 823.887 | 706.288 | 790.844        | 825.471        | 1051.563 |
|-------------------------|--------|--------|---------|---------|---------|----------------|----------------|----------------|----------------|---------|---------|---------|----------------|-----------------------|----------------|---------|---------|------------------------------|-----------------|---------|---------|---------|----------------|----------------|----------|
| Frag. Inten. (% of TIC) | 0.50   | 1.88   | 0.03    | 1.54    | 1.87    | 2.23           | 1.34           | 2.01           | 22.54          | 1.14    | 1.23    | 1.31    | 1.67           | 1.22                  | 3.94           | 1.23    | 1.05    | 17.54                        | 1.99            | 1.74    | 1.12    | 1.33    | 1.20           | 1.88           | 26.34    |
| Rel. Inten. (% of BP)   | 2.27   | 7.15   | 0.13    | 5.83    | 7.10    | 8.45           | 5.10           | 7.63           | 85.56          | 4.34    | 4.66    | 4.96    | 6.33           | 4.64                  | 14.96          | 4.69    | 4.04    | 66.58                        | 7.56            | 6.62    | 4.23    | 5.06    | 4.57           | 7.14           | 100.00   |
| Score                   | 0.22   | -0.07  | 1.00    | 1.50    | -0.07   | 0.50           | 1.50           | 0.50           | 0.50           | 0.50    | 0.75    | -0.05   | 0.50           | -0.05                 | 0.50           | -0.05   | -0.04   | 1.50                         | 1.50            | -0.07   | -0.04   | -0.05   | -0.05          | 1.50           | 1.50     |
| Ion-type                | LI     |        | F       | YI      |         | b <sub>1</sub> | Y <sub>2</sub> | a <sub>2</sub> | b <sub>2</sub> | PEY-28  | PEY     |         | a <sub>3</sub> |                       | b <sub>3</sub> |         |         | Y <sub>8</sub> <sup>+2</sup> | Y <sup>+9</sup> |         |         |         | Y <sub>6</sub> | Y <sub>8</sub> |          |
| Delta ppm               | 0.9    |        | -2.3    | 16.3    |         | 2.1            | -25.1          | -9.6           | -0.0           | 34.9    | 18.8    |         | 25.5           |                       | -0.2           |         |         | -0.4                         | 2.9             |         |         |         | 11.5           | -4.4           |          |

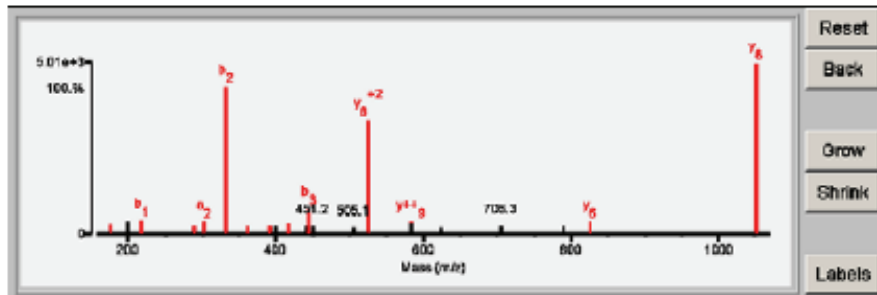



197

Detailed Results

| Rank                    | Score  | SPI (%) | BC3     | # Unmatched Ions | Sequence                                    | MH <sup>+</sup> Calculated (Da) | MH <sup>+</sup> Error (Da) | MH <sup>+</sup> Error (ppm) | Protein MW pI (Da) | Species | Accession #            | MS-Digest Index #      | Protein Name                       |         |         |           |         |           |         |         |         |         |         |         |          |
|-------------------------|--------|---------|---------|------------------|---------------------------------------------|---------------------------------|----------------------------|-----------------------------|--------------------|---------|------------------------|------------------------|------------------------------------|---------|---------|-----------|---------|-----------|---------|---------|---------|---------|---------|---------|----------|
| 1                       | 18.13  | 84.2    | 7       | 4/26             | (G) P V L I P I A I A I P P V Y A P E R (Q) | 1302.8875                       | -0.0083                    | -2.8                        | 129832.0 4.43      | HUMAN   | <a href="#">Q8NQC3</a> | <a href="#">575807</a> | Reticulon-4 - Homo sapiens (Human) |         |         |           |         |           |         |         |         |         |         |         |          |
| Fragment-Ion (m/z)      | 70.088 | 88.087  | 141.103 | 168.081          | 188.084                                     | 188.058                         | 240.132                    | 241.134                     | 271.142            | 288.138 | 334.881*2              | 383.218*2              | 388.183                            | 487.232 | 472.248 | 602.782*2 | 638.283 | 673.785*2 | 807.567 | 808.867 | 888.389 | 785.422 | 838.488 | 907.480 | 1004.546 |
| Frag. Inten. (% of TIC) | 0.00   | 0.03    | 1.35    | 2.16             | 3.10                                        | 6.54                            | 7.32                       | 1.09                        | 1.09               | 1.80    | 0.95                   | 14.50                  | 3.08                               | 2.79    | 0.87    | 20.01     | 2.09    | 1.64      | 2.17    | 0.87    | 2.13    | 14.35   | 2.20    | 1.31    | 6.46     |
| Rel. Inten. (% of BP)   | 0.01   | 0.16    | 6.74    | 10.79            | 15.48                                       | 32.65                           | 36.56                      | 5.43                        | 5.43               | 9.02    | 4.75                   | 72.96                  | 15.40                              | 13.94   | 4.33    | 100.00    | 10.46   | 8.20      | 10.82   | 4.35    | 10.64   | 71.72   | 11.01   | 6.53    | 32.26    |
| Score                   | 0.20   | 0.22    | 0.50    | 0.50             | 0.75                                        | 0.50                            | 0.75                       | -0.05                       | 0.50               | 0.50    | 1.50                   | 1.50                   | 0.50                               | 0.50    | 1.50    | 0.50      | 0.50    | -0.08     | -0.11   | -0.04   | 1.50    | 1.50    | 1.50    | 1.50    | 1.50     |
| Ion-type                | PR     | LI      | AP-28   | a1               | AP                                          | b1                              | AAP                        | a2                          | b2                 | y5      | y7                     | y7                     | b3                                 | b4      | y4      | y10       | b5      |           |         |         | y5      | y7      | y8      | y8      | y10      |
| Delta ppm               | 8.2    | 9.0     | -5.2    | -19.7            | -24.0                                       | -7.6                            | -11.9                      | -22.4                       | -14.3              | 2.3     | -0.6                   | -8.2                   | -2.1                               | -6.2    | 4.5     | -13.3     |         |           |         |         | -5.2    | -4.0    | 7.4     | -10.2   | -7.6     |

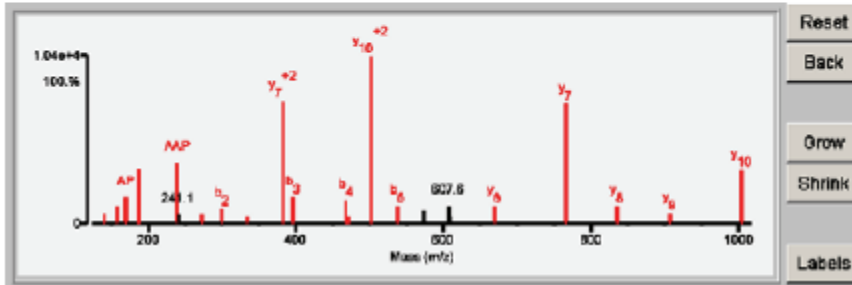

198

Detailed Results

| Rank                    | Score  | SPI (%) | BC3    | # Unmatched Ions | Sequence                                                      | MH <sup>+</sup> Calculated (Da) | MH <sup>+</sup> Error (Da) | MH <sup>+</sup> Error (ppm) | Protein MW pI (Da) | Species | Accession #            | MS-Digest Index #      | Protein Name                       |          |         |         |         |         |         |         |              |          |         |          |          |
|-------------------------|--------|---------|--------|------------------|---------------------------------------------------------------|---------------------------------|----------------------------|-----------------------------|--------------------|---------|------------------------|------------------------|------------------------------------|----------|---------|---------|---------|---------|---------|---------|--------------|----------|---------|----------|----------|
| 1                       | 18.08  | 80.6    | 7      | 3/25             | (A) A P V L P T A P A A G A P L M D F G H D F Y P P A P R (Q) | 2884.2848                       | 0.0048                     | 1.8                         | 129832.0 4.43      | HUMAN   | <a href="#">Q8NQC3</a> | <a href="#">575807</a> | Reticulon-4 - Homo sapiens (Human) |          |         |         |         |         |         |         |              |          |         |          |          |
| Fragment-Ion (m/z)      | 70.088 | 72.030  | 88.086 | 120.081          | 128.080                                                       | 188.128                         | 211.143                    | 262.183                     | 267.084            | 268.086 | 288.181                | 270.161                | 272.170                            | 340.186  | 368.188 | 388.184 | 438.224 | 457.212 | 520.286 | 637.313 | 618.318      | 837.383  | 783.460 | 1088.525 | 1872.808 |
| Frag. Inten. (% of TIC) | 0.02   | 0.12    | 0.23   | 0.12             | 2.85                                                          | 4.87                            | 1.54                       | 5.40                        | 11.96              | 1.74    | 3.84                   | 3.28                   | 3.67                               | 2.92     | 5.76    | 2.65    | 3.74    | 2.43    | 3.28    | 27.72   | 1.75         | 3.52     | 1.87    | 2.81     | 2.24     |
| Rel. Inten. (% of BP)   | 0.06   | 0.44    | 0.82   | 0.43             | 10.26                                                         | 17.58                           | 6.98                       | 19.50                       | 43.14              | 6.29    | 13.86                  | 8.16                   | 12.89                              | 10.53    | 20.78   | 9.60    | 13.48   | 8.75    | 11.72   | 100.00  | 6.34         | 14.14    | 6.73    | 10.15    | 8.09     |
| Score                   | 0.20   | 0.50    | 0.22   | 1.00             | -0.10                                                         | -0.18                           | 0.75                       | 0.50                        | 0.50               | -0.08   | 1.50                   | 0.75                   | 1.50                               | 0.50     | 0.50    | 0.75    | 0.75    | 0.75    | 0.50    | 1.50    | 1.50         | 1.50     | 1.50    | 1.50     | 1.50     |
| Ion-type                | PR     | V       | LI     | F                |                                                               |                                 | PL                         | TAP-H2O                     | b2                 |         | yH+5                   | TAP                    | y2                                 | AAGAP-28 | b3      | AAGAP   | APAAGA  | PLMD    | y5-NH3  | y5      | TAPAAGAP-H2O | TAPAAGAP | y7      | y10      | y15      |
| Delta ppm               | 8.2    | -16.3   | -2.6   | 5.2              |                                                               |                                 | -9.5                       | -10.2                       | -7.9               |         | 1.8                    | 19.5                   | -6.7                               | -11.3    | -6.6    | 1.2     | -16.1   | -0.9    | -5.8    | 15.6    | -5.1         | 2.5      | -1.0    | -16.0    | -5.2     |

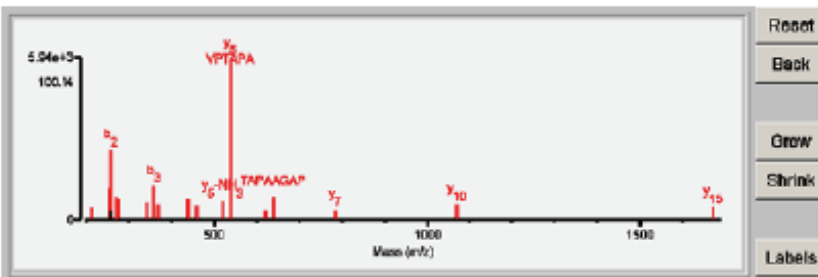

Detailed Results

| Rank | Score | SPI (%) | BCS | # Unmatched Ions | Sequence                            | MH <sup>+</sup> Calculated (Da) | MH <sup>+</sup> Error (Da) | MH <sup>+</sup> Error (ppm) | Protein MWipl (Da) | Species | Accession #            | MS-Digest Index #      | Protein Name                                  |
|------|-------|---------|-----|------------------|-------------------------------------|---------------------------------|----------------------------|-----------------------------|--------------------|---------|------------------------|------------------------|-----------------------------------------------|
| 1    | 23.51 | 96.6    | 9   | 2/25             | (L)A/HIPLIPE/E/P/L/D/L/D/LEVY/R (G) | 2085.1123                       | 0.0116                     | 5.6                         | 50414.3/9.65       | HUMAN   | <a href="#">Q9BTD8</a> | <a href="#">470709</a> | RNA-binding protein 42 - Homo sapiens (Human) |

  

| Fragment-ion (m/z)     | 70.067 | 104.054 | 175.115 | 183.150 | 199.103 | 211.140 | 227.103 | 291.081 | 324.154 | 337.198 | 388.135 | 437.234 | 453.187 | 501.204 | 566.843           | 663.332 | 679.905 <sup>+2</sup>         | 712.435 | 792.956 <sup>+2</sup>         | 898.020 <sup>+2</sup>         | 922.581 | 963.551 <sup>+2</sup>         | 1132.713 | 1358.786        | 1584.893        |
|------------------------|--------|---------|---------|---------|---------|---------|---------|---------|---------|---------|---------|---------|---------|---------|-------------------|---------|-------------------------------|---------|-------------------------------|-------------------------------|---------|-------------------------------|----------|-----------------|-----------------|
| Frac. Inten.(% of TIC) | 0.00   | 2.18    | 0.94    | 2.56    | 0.82    | 2.10    | 4.97    | 1.17    | 1.32    | 1.26    | 5.68    | 4.36    | 2.11    | 2.52    | 1.27              | 1.63    | 6.39                          | 3.66    | 17.76                         | 15.19                         | 4.00    | 3.89                          | 3.66     | 6.24            | 4.22            |
| Rel. Inten.(% of BP)   | 0.02   | 12.27   | 5.27    | 14.39   | 5.17    | 11.81   | 28.00   | 6.60    | 7.42    | 7.12    | 31.97   | 24.57   | 11.90   | 14.22   | 7.16              | 9.16    | 35.95                         | 20.60   | 100.00                        | 85.51                         | 22.53   | 21.88                         | 20.62    | 35.11           | 23.78           |
| Score                  | 0.20   | -0.12   | 1.50    | 0.50    | 0.50    | 0.75    | 0.75    | 0.50    | 0.75    | -0.07   | 0.50    | 0.75    | 0.75    | 0.50    | 1.50              | 0.75    | 1.50                          | 1.50    | 1.50                          | 1.50                          | 1.50    | 1.50                          | 1.50     | 1.50            | 1.50            |
| Ion-type               | PR     |         | y1      | PL-28   | EP-28   | PL      | EP      |         | b2      | PEP     | b3      | EPLP    | EPEP    | b4      | y <sup>++10</sup> | EPEPLP  | y <sub>12</sub> <sup>+2</sup> | y6      | y <sub>14</sub> <sup>+2</sup> | y <sub>16</sub> <sup>+2</sup> | y8      | y <sub>17</sub> <sup>+2</sup> | y10      | y <sub>12</sub> | y <sub>14</sub> |
| Delta ppm              | 28.2   |         | -22.6   | -3.8    | -28.2   | -27.0   | -3.7    | -12.6   | -9.2    |         | -5.2    | -14.5   | -27.1   | -33.3   | -26.0             | -6.5    | -0.5                          | 0.1     | 3.6                           | -1.7                          | 9.3     | 9.0                           | 3.5      | -13.8           | -4.4            |

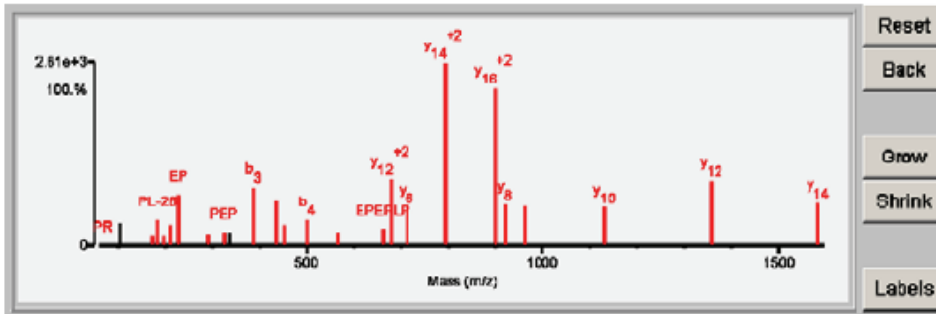

Detailed Results

| Rank | Score | SPI (%) | BCS | # Unmatched Ions | Sequence                                             | MH <sup>+</sup> Calculated (Da) | MH <sup>+</sup> Error (Da) | MH <sup>+</sup> Error (ppm) | Protein MWipl (Da) | Species | Accession #            | MS-Digest Index #      | Protein Name                                                   |
|------|-------|---------|-----|------------------|------------------------------------------------------|---------------------------------|----------------------------|-----------------------------|--------------------|---------|------------------------|------------------------|----------------------------------------------------------------|
| 1    | 13.53 | 54.3    | 6   | 7/25             | (M)A L A F S / R Q E E / H E / L / P V / L S / R (Q) | 2042.9652                       | 0.0355                     | 17.4                        | 41595.7/5.18       | HUMAN   | <a href="#">O75995</a> | <a href="#">584219</a> | SAM and SH3 domain-containing protein 3 - Homo sapiens (Human) |

  

| Fragment-ion (m/z)     | 70.066 | 72.081 | 86.097 | 101.069 | 110.072 | 120.081 | 157.133 | 175.119 | 185.128 | 191.118 | 256.165 | 375.241 | 571.366 | 659.358 | 660.340 <sup>+2</sup>                          | 684.443 | 733.365 <sup>+2</sup>         | 767.891 <sup>+2</sup>                           | 811.886 | 812.379 | 820.890 <sup>+2</sup>         | 841.420 <sup>+2</sup>                           | 894.426 <sup>+2</sup> | 929.946 <sup>+2</sup> | 950.544 |
|------------------------|--------|--------|--------|---------|---------|---------|---------|---------|---------|---------|---------|---------|---------|---------|------------------------------------------------|---------|-------------------------------|-------------------------------------------------|---------|---------|-------------------------------|-------------------------------------------------|-----------------------|-----------------------|---------|
| Frac. Inten.(% of TIC) | 0.00   | 0.04   | 0.49   | 0.04    | 0.07    | 0.11    | 17.39   | 2.07    | 9.34    | 2.32    | 3.66    | 1.57    | 4.96    | 1.19    | 1.40                                           | 1.84    | 1.54                          | 1.49                                            | 1.65    | 2.58    | 8.79                          | 1.41                                            | 13.01                 | 21.28                 | 1.79    |
| Rel. Inten.(% of BP)   | 0.01   | 0.21   | 2.31   | 0.18    | 0.32    | 0.50    | 81.72   | 9.74    | 43.86   | 10.00   | 17.16   | 7.36    | 23.29   | 5.57    | 6.58                                           | 8.66    | 7.23                          | 6.99                                            | 7.76    | 12.12   | 41.29                         | 6.63                                            | 61.12                 | 100.00                | 8.43    |
| Score                  | 0.20   | 0.50   | 0.22   | 0.50    | 1.00    | 1.00    | 0.50    | 1.50    | 0.75    | -0.11   | -0.17   | 1.50    | 1.50    | -0.06   | 0.50                                           | 1.50    | 1.50                          | 0.50                                            | -0.08   | -0.12   | 0.50                          | 0.50                                            | -0.61                 | -1.00                 | 1.50    |
| Ion-type               | PR     | V      | LI     | QK      | H       | F       | LA-28   | y1      | LA      |         | y3      | y5      |         |         | y <sub>11</sub> -NH <sub>3</sub> <sup>+2</sup> | y6      | y <sub>12</sub> <sup>+2</sup> | y <sub>13</sub> -H <sub>2</sub> O <sup>+2</sup> |         |         | a <sub>14</sub> <sup>+2</sup> | y <sub>14</sub> -H <sub>2</sub> O <sup>+2</sup> |                       | y6                    |         |
| Delta ppm              | 5.3    | 4.5    | 6.7    | -16.2   | 4.8     | -0.6    | -11.7   | 0.8     | -7.3    |         | 16.4    | 16.4    |         |         | 10.2                                           | 4.3     | -3.6                          | 16.4                                            |         |         | 5.0                           | 9.3                                             |                       |                       | 2.1     |

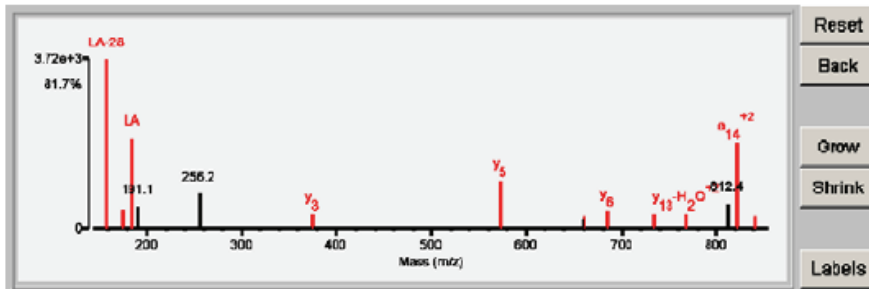

# I101

## Detailed Results

| Rank | Score | SPI (%) | BCS | # Unmatched Ions | Sequence                          | MH <sup>+</sup> Calculated (Da) | MH <sup>+</sup> Error (Da) | MH <sup>+</sup> Error (ppm) | Protein MW/pl (Da) | Species | Accession #            | MS-Digest Index #      | Protein Name                                                 |
|------|-------|---------|-----|------------------|-----------------------------------|---------------------------------|----------------------------|-----------------------------|--------------------|---------|------------------------|------------------------|--------------------------------------------------------------|
| 1    | 10.35 | 65.9    | 3   | 12/25            | (M) Y T I I N P I G Q G A G R (A) | 1485.6926                       | -0.0081                    | -5.5                        | 39388.6/6.30       | HUMAN   | <a href="#">Q9BWW4</a> | <a href="#">606909</a> | Single-stranded DNA-binding protein 4 - Homo sapiens (Human) |

  

| Fragment-ion (m/z)      | 70.066 | 72.082 | 84.082 | 86.097 | 94.067 | 175.121 | 183.149 | 211.144 | 219.093 | 259.055 | 290.142 | 340.185 | 352.113 | 353.114        | 372.147 | 465.190 | 500.749 <sup>+2</sup>         | 557.291 <sup>+2</sup>         | 661.315 | 689.368           | 790.350                          | 903.446                          | 922.466 | 1000.488        | 1113.555        |
|-------------------------|--------|--------|--------|--------|--------|---------|---------|---------|---------|---------|---------|---------|---------|----------------|---------|---------|-------------------------------|-------------------------------|---------|-------------------|----------------------------------|----------------------------------|---------|-----------------|-----------------|
| Frac. Inten. (% of TIC) | 0.01   | 2.19   | 4.07   | 0.58   | 2.46   | 2.93    | 3.06    | 2.27    | 1.85    | 4.13    | 1.55    | 1.78    | 7.98    | 1.83           | 2.26    | 2.38    | 17.33                         | 2.03                          | 1.85    | 1.83              | 4.52                             | 2.22                             | 1.81    | 25.79           | 1.97            |
| Rel. Inten. (% of BP)   | 0.02   | 8.51   | 15.77  | 2.18   | 9.53   | 11.38   | 11.81   | 8.81    | 6.38    | 18.02   | 6.02    | 6.84    | 30.88   | 6.32           | 8.78    | 9.21    | 87.22                         | 7.88                          | 7.18    | 6.33              | 17.52                            | 8.60                             | 7.01    | 100.00          | 7.65            |
| Score                   | 0.20   | -0.09  | -0.16  | 0.22   | -0.10  | 1.50    | 0.50    | 0.75    | -0.06   | -0.16   | -0.06   | -0.07   | -0.31   | 0.50           | -0.09   | -0.09   | 1.50                          | 1.50                          | -0.07   | 1.50              | 0.25                             | 0.25                             | -0.07   | 1.50            | 1.50            |
| Ion-type                | PR     |        |        | LI     |        | Y1      | PI-28   | PI      |         |         |         |         |         | b <sub>2</sub> |         |         | y <sub>10</sub> <sup>+2</sup> | y <sub>11</sub> <sup>+2</sup> |         | y <sup>++13</sup> | b <sub>6</sub> -H <sub>2</sub> O | b <sub>7</sub> -H <sub>2</sub> O |         | y <sub>10</sub> | y <sub>11</sub> |
| Delta ppm               | 16.8   |        |        | 10.2   |        | 11.7    | -7.6    | -7.6    |         |         |         |         |         | -10.7          |         |         | -8.3                          | -7.9                          |         | 1.5               | 28.8                             | 38.4                             |         | -11.5           | -25.4           |

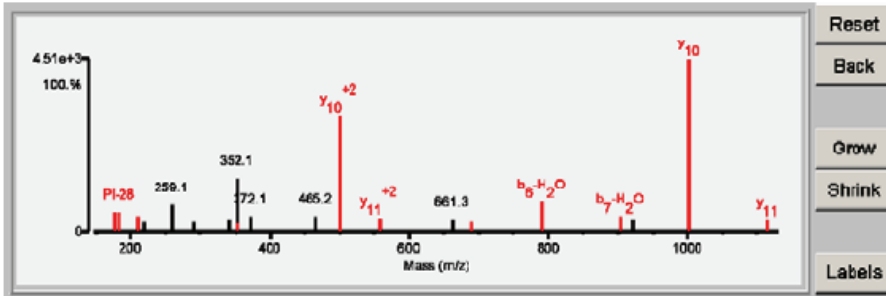

# I102

## Detailed Results

| Rank | Score | SPI (%) | BCS | # Unmatched Ions | Sequence                      | MH <sup>+</sup> Calculated (Da) | MH <sup>+</sup> Error (Da) | MH <sup>+</sup> Error (ppm) | Protein MW/pl (Da) | Species | Accession #            | MS-Digest Index #      | Protein Name                                             |
|------|-------|---------|-----|------------------|-------------------------------|---------------------------------|----------------------------|-----------------------------|--------------------|---------|------------------------|------------------------|----------------------------------------------------------|
| 1    | 10.21 | 60.6    | 4   | 11/25            | (I) E I F L V Y I I V P R (A) | 1336.7334                       | 0.0018                     | 1.3                         | 127617.7/6.64      | HUMAN   | <a href="#">Q9UHW9</a> | <a href="#">581111</a> | Solute carrier family 12 member 6 - Homo sapiens (Human) |

  

| Fragment-ion (m/z)      | 70.065 | 72.080 | 74.060 | 84.044 | 86.095 | 102.054 | 110.067 | 120.080 | 136.076 | 173.100 | 175.122 | 183.114 | 254.151 | 272.164 | 343.238 | 352.183 | 367.239 | 371.235 | 385.250 | 427.216 <sup>+2</sup>        | 483.747 | 484.319 | 781.381 | 853.421        | 966.507        |
|-------------------------|--------|--------|--------|--------|--------|---------|---------|---------|---------|---------|---------|---------|---------|---------|---------|---------|---------|---------|---------|------------------------------|---------|---------|---------|----------------|----------------|
| Frac. Inten. (% of TIC) | 0.01   | 0.19   | 1.89   | 0.10   | 0.36   | 0.06    | 2.35    | 0.06    | 0.12    | 2.55    | 2.72    | 4.84    | 9.23    | 5.20    | 5.72    | 1.87    | 2.90    | 7.85    | 4.44    | 4.29                         | 1.75    | 1.88    | 1.90    | 32.59          | 5.37           |
| Rel. Inten. (% of BP)   | 0.02   | 0.57   | 5.79   | 0.32   | 1.11   | 0.19    | 7.21    | 0.18    | 0.38    | 7.82    | 8.35    | 14.85   | 28.31   | 15.95   | 17.55   | 5.72    | 8.88    | 23.48   | 13.62   | 13.17                        | 5.38    | 5.89    | 5.83    | 100.00         | 16.48          |
| Score                   | 0.20   | 0.50   | -0.06  | 1.00   | 0.22   |         | -0.07   | 1.00    | 1.00    | -0.08   | 1.50    | -0.15   | -0.28   | 1.50    | -0.18   | -0.06   | -0.06   | 1.50    | -0.14   | 0.50                         | -0.05   | 1.50    | -0.06   | 0.50           | 0.50           |
| Ion-type                | PR     | V      |        | E      | LI     |         | E       | F       | Y       |         | y1      |         |         | y2      |         |         |         | y3      |         | b <sub>6</sub> <sup>+2</sup> |         | y4      |         | b <sub>6</sub> | b <sub>7</sub> |
| Delta ppm               | -7.5   | -10.8  |        | -7.0   | -11.9  |         |         | -8.1    | 3.7     |         | 18.0    |         |         | -29.5   |         |         |         | -14.9   |         | 8.0                          |         | -11.3   |         | 3.9            | 5.3            |

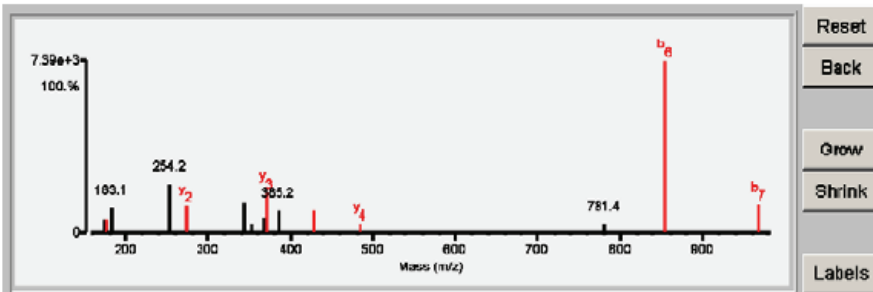

# I103

## Detailed Results

| Rank | Score | SPI (%) | BCS | # Unmatched Ions | Sequence                                      | MH <sup>+</sup> Calculated (Da) | MH <sup>+</sup> Error (Da) | MH <sup>+</sup> Error (ppm) | Protein MW/pl (Da) | Species | Accession #            | MS-Digest Index #      | Protein Name                           |
|------|-------|---------|-----|------------------|-----------------------------------------------|---------------------------------|----------------------------|-----------------------------|--------------------|---------|------------------------|------------------------|----------------------------------------|
| 1    | 12.58 | 69.3    | 6   | 10/25            | (R) I V N E P T N L I Q / D / P D / V / R (E) | 1722.8302                       | 0.0038                     | 2.2                         | 59069.8/5.08       | HUMAN   | <a href="#">Q13596</a> | <a href="#">599225</a> | Sorting nexin-1 - Homo sapiens (Human) |

  

| Fragment-ion (m/z)      | 70.066 | 72.082 | 84.044 | 86.097 | 87.098 | 101.070 | 104.054 | 110.071 | 175.118 | 185.164 | 213.084 | 217.136 | 243.635 | 252.111 | 274.188 | 275.191 | 436.262 | 464.263 | 486.270 | 601.290 | 644.346 | 729.359 | 775.387 | 881.399 | 994.481 |
|-------------------------|--------|--------|--------|--------|--------|---------|---------|---------|---------|---------|---------|---------|---------|---------|---------|---------|---------|---------|---------|---------|---------|---------|---------|---------|---------|
| Frac. Inten. (% of TIC) | 0.01   | 0.18   | 4.28   | 0.73   | 2.06   | 0.09    | 3.47    | 0.15    | 5.08    | 4.50    | 2.89    | 3.80    | 3.77    | 2.80    | 22.95   | 3.12    | 2.21    | 1.92    | 15.57   | 4.25    | 3.06    | 3.72    | 2.49    | 4.56    | 2.98    |
| Rel. Inten. (% of BP)   | 0.03   | 0.71   | 18.85  | 3.17   | 8.87   | 0.39    | 15.12   | 0.67    | 22.05   | 19.59   | 11.74   | 15.89   | 16.43   | 11.33   | 100.00  | 13.60   | 9.63    | 8.38    | 67.82   | 18.51   | 13.33   | 16.21   | 10.88   | 19.85   | 12.97   |
| Score                   | 0.20   | 0.50   | -0.19  | 0.22   | -0.09  | 0.50    | -0.15   | 1.00    | 1.50    | -0.20   | 0.75    | -0.16   | 1.50    | 0.75    | 1.50    | -0.14   | -0.10   | -0.08   | 1.50    | 1.50    | -0.13   | 1.50    | -0.11   | 0.50    | 0.50    |
| Ion-type                | PR     | V      |        | LI     |        | QK      |         | H       | y1      |         | PD      |         | y++4    | NH      | y2      |         |         |         | y4      | y5      |         | y6      |         | b7      | b8      |
| Delta ppm               | 8.2    | 15.6   |        | 2.0    |        | -12.3   |         | -3.4    | -3.7    |         | -19.6   |         | -9.7    | 4.3     | 1.6     |         |         |         | 5.8     | -6.8    |         | 6.2     |         | -3.9    | -5.3    |

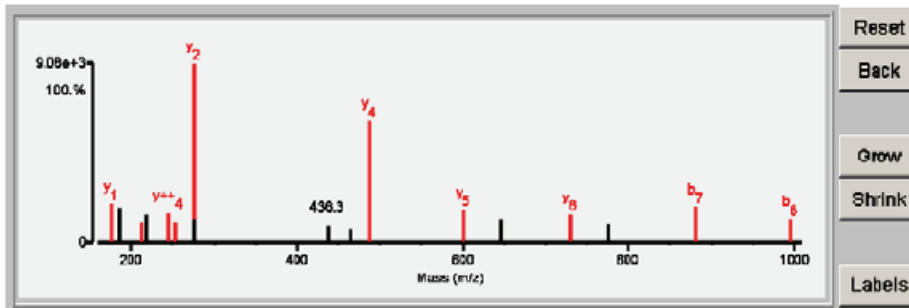

# I104

## Detailed Results

| Rank | Score | SPI (%) | BCS | # Unmatched Ions | Sequence                                        | MH <sup>+</sup> Calculated (Da) | MH <sup>+</sup> Error (Da) | MH <sup>+</sup> Error (ppm) | Protein MW/pl (Da) | Species | Accession #            | MS-Digest Index #      | Protein Name                                        |
|------|-------|---------|-----|------------------|-------------------------------------------------|---------------------------------|----------------------------|-----------------------------|--------------------|---------|------------------------|------------------------|-----------------------------------------------------|
| 1    | 10.47 | 68.0    | 7   | 7/25             | (R) H E T T F E H D I Q A L L G T / Q V / R (Q) | 2071.9688                       | 0.0134                     | 6.5                         | 274610.6/5.39      | HUMAN   | <a href="#">Q01082</a> | <a href="#">604999</a> | Spectrin beta chain, brain 1 - Homo sapiens (Human) |

  

| Fragment-ion (m/z)      | 70.065 | 72.081 | 84.044 | 86.097 | 101.072 | 110.071 | 120.081 | 143.116 | 175.118 | 269.105 | 385.216 | 402.244 | 432.230*2 | 535.193*2 | 542.303 | 544.205*2 | 560.314 | 600.247 | 600.740 | 609.261 | 655.774*2 | 664.769 | 665.283 | 700.288*2 | 716.372 |
|-------------------------|--------|--------|--------|--------|---------|---------|---------|---------|---------|---------|---------|---------|-----------|-----------|---------|-----------|---------|---------|---------|---------|-----------|---------|---------|-----------|---------|
| Frac. Inten. (% of TIC) | 0.00   | 0.24   | 0.28   | 0.60   | 0.13    | 0.28    | 0.21    | 3.74    | 5.01    | 10.04   | 3.56    | 4.64    | 2.70      | 7.36      | 6.30    | 9.56      | 16.41   | 3.81    | 4.12    | 2.62    | 2.46      | 3.39    | 3.94    | 3.46      | 5.13    |
| Rel. Inten. (% of BP)   | 0.03   | 1.47   | 1.72   | 3.66   | 0.77    | 1.73    | 1.29    | 22.79   | 30.55   | 61.20   | 21.72   | 28.28   | 16.43     | 44.85     | 38.38   | 58.29     | 100.00  | 23.22   | 25.08   | 15.99   | 14.99     | 20.64   | 24.02   | 21.07     | 31.27   |
| Score                   | 0.20   | 0.50   | 1.00   | 0.22   | 0.50    | 1.00    | 1.00    | -0.23   | 1.50    | -0.61   | 0.50    | 1.50    | -0.16     | 0.25      | 0.50    | 0.50      | 1.50    | -0.23   | 0.50    | -0.16   | 0.25      | 0.50    | -0.24   | 0.50      | -0.31   |
| Ion-type                | PR     | V      | E      | LI     | QK      | H       | F       |         | y1      | y3-NH3  | y3      |         |           | b8-H2O+2  | y5-H2O  | b6+2      | y5      |         | b++9    |         | b10-H2O+2 | b++10   |         | b11+2     |         |
| Delta ppm               | 1.1    | 7.3    | 0.1    | 7.8    | 7.5     | 0.2     | -2.3    |         | -3.2    | -10.1   | -3.8    |         |           | -7.8      | -2.3    | 3.7       | -1.6    |         | -8.3    |         | 7.8       | -8.4    |         | -7.4      |         |

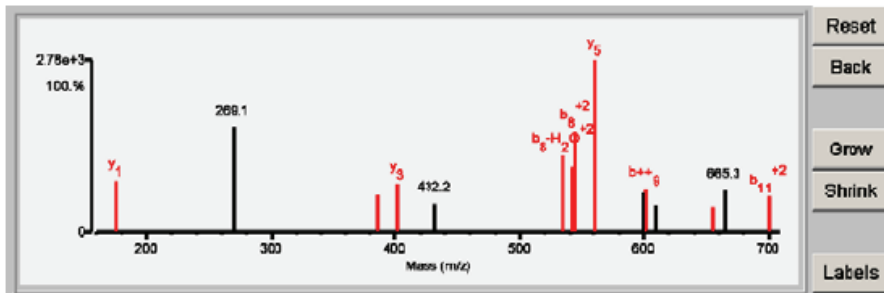

# I105

## Detailed Results

| Rank                                                                                                                                                                                                                                                                                                                                                                                                                                                                                                                                                                                                                                                                                                                                                                                                                                                                                                                                                                                                                                                                                                                                                                                                                                                                                                                                                                                                                                                                                                                                                                                                                                                                                                                                                                                                                                                                                                                                                                                                                                                                                                                                                                                                                                                                                                                                                                                                                                                                                                    | Score  | SPI (%) | BCS    | # Unmatched Ions | Sequence                                            | MH <sup>+</sup> Calculated (Da) | MH <sup>+</sup> Error (Da) | MH <sup>+</sup> Error (ppm) | Protein MW (pl) (Da) | Species | Accession #            | MS-Digest Index #      | Protein Name                    |                    |         |         |         |         |                       |         |         |         |         |          |          |         |         |         |         |         |         |         |                       |         |         |         |         |          |          |                         |      |      |      |      |      |      |      |      |      |      |       |      |      |      |      |      |      |      |      |      |      |      |      |      |      |                       |      |       |      |       |      |       |       |       |       |       |        |       |       |       |       |       |       |       |       |       |       |       |       |       |       |       |      |       |      |       |      |      |      |       |       |      |      |       |      |       |      |      |       |      |       |      |       |       |      |      |      |          |    |    |    |   |    |    |        |    |    |    |    |    |    |    |    |     |     |     |     |     |     |     |     |     |     |           |       |  |       |  |      |     |      |  |  |      |  |  |      |  |      |     |  |     |  |     |  |  |     |      |     |
|---------------------------------------------------------------------------------------------------------------------------------------------------------------------------------------------------------------------------------------------------------------------------------------------------------------------------------------------------------------------------------------------------------------------------------------------------------------------------------------------------------------------------------------------------------------------------------------------------------------------------------------------------------------------------------------------------------------------------------------------------------------------------------------------------------------------------------------------------------------------------------------------------------------------------------------------------------------------------------------------------------------------------------------------------------------------------------------------------------------------------------------------------------------------------------------------------------------------------------------------------------------------------------------------------------------------------------------------------------------------------------------------------------------------------------------------------------------------------------------------------------------------------------------------------------------------------------------------------------------------------------------------------------------------------------------------------------------------------------------------------------------------------------------------------------------------------------------------------------------------------------------------------------------------------------------------------------------------------------------------------------------------------------------------------------------------------------------------------------------------------------------------------------------------------------------------------------------------------------------------------------------------------------------------------------------------------------------------------------------------------------------------------------------------------------------------------------------------------------------------------------|--------|---------|--------|------------------|-----------------------------------------------------|---------------------------------|----------------------------|-----------------------------|----------------------|---------|------------------------|------------------------|---------------------------------|--------------------|---------|---------|---------|---------|-----------------------|---------|---------|---------|---------|----------|----------|---------|---------|---------|---------|---------|---------|---------|-----------------------|---------|---------|---------|---------|----------|----------|-------------------------|------|------|------|------|------|------|------|------|------|------|-------|------|------|------|------|------|------|------|------|------|------|------|------|------|------|-----------------------|------|-------|------|-------|------|-------|-------|-------|-------|-------|--------|-------|-------|-------|-------|-------|-------|-------|-------|-------|-------|-------|-------|-------|-------|-------|------|-------|------|-------|------|------|------|-------|-------|------|------|-------|------|-------|------|------|-------|------|-------|------|-------|-------|------|------|------|----------|----|----|----|---|----|----|--------|----|----|----|----|----|----|----|----|-----|-----|-----|-----|-----|-----|-----|-----|-----|-----|-----------|-------|--|-------|--|------|-----|------|--|--|------|--|--|------|--|------|-----|--|-----|--|-----|--|--|-----|------|-----|
| 1                                                                                                                                                                                                                                                                                                                                                                                                                                                                                                                                                                                                                                                                                                                                                                                                                                                                                                                                                                                                                                                                                                                                                                                                                                                                                                                                                                                                                                                                                                                                                                                                                                                                                                                                                                                                                                                                                                                                                                                                                                                                                                                                                                                                                                                                                                                                                                                                                                                                                                       | 12.10  | 63.6    | 9      | 10/25            | (R) A S V G Q I A / F / E / L / I / L / S P / R (S) | 1476.7515                       | 0.0020                     | 1.4                         | 17302.6/5.76         | HUMAN   | <a href="#">P16949</a> | <a href="#">610899</a> | Stathmin - Homo sapiens (Human) |                    |         |         |         |         |                       |         |         |         |         |          |          |         |         |         |         |         |         |         |                       |         |         |         |         |          |          |                         |      |      |      |      |      |      |      |      |      |      |       |      |      |      |      |      |      |      |      |      |      |      |      |      |      |                       |      |       |      |       |      |       |       |       |       |       |        |       |       |       |       |       |       |       |       |       |       |       |       |       |       |       |      |       |      |       |      |      |      |       |       |      |      |       |      |       |      |      |       |      |       |      |       |       |      |      |      |          |    |    |    |   |    |    |        |    |    |    |    |    |    |    |    |     |     |     |     |     |     |     |     |     |     |           |       |  |       |  |      |     |      |  |  |      |  |  |      |  |      |     |  |     |  |     |  |  |     |      |     |
| <table border="1"> <thead> <tr> <th>Fragment-ion (m/z)</th> <th>70.064</th> <th>72.081</th> <th>86.095</th> <th>110.069</th> <th>120.081</th> <th>175.119</th> <th>247.081</th> <th>251.067</th> <th>304.144</th> <th>342.190</th> <th>359.204</th> <th>414.125</th> <th>432.166</th> <th>457.254</th> <th>472.285</th> <th>585.376</th> <th>680.373</th> <th>698.463</th> <th>716.309<sup>+2</sup></th> <th>827.501</th> <th>900.451</th> <th>968.900</th> <th>974.571</th> <th>1045.618</th> <th>1118.560</th> </tr> </thead> <tbody> <tr> <td>Frac. Inten. (% of TIC)</td> <td>0.01</td> <td>5.13</td> <td>0.38</td> <td>4.44</td> <td>0.14</td> <td>4.00</td> <td>3.40</td> <td>3.15</td> <td>2.65</td> <td>3.67</td> <td>10.98</td> <td>2.79</td> <td>2.72</td> <td>6.28</td> <td>6.73</td> <td>4.46</td> <td>2.81</td> <td>3.98</td> <td>2.76</td> <td>4.95</td> <td>2.85</td> <td>3.77</td> <td>9.00</td> <td>6.36</td> <td>2.78</td> </tr> <tr> <td>Rel. Inten. (% of BP)</td> <td>0.07</td> <td>46.70</td> <td>3.50</td> <td>40.46</td> <td>1.25</td> <td>36.45</td> <td>30.97</td> <td>28.66</td> <td>24.17</td> <td>33.38</td> <td>100.00</td> <td>25.38</td> <td>24.77</td> <td>57.21</td> <td>61.33</td> <td>40.63</td> <td>25.63</td> <td>36.24</td> <td>25.18</td> <td>46.08</td> <td>24.17</td> <td>34.36</td> <td>81.06</td> <td>57.87</td> <td>25.29</td> </tr> <tr> <td>Score</td> <td>0.20</td> <td>-0.47</td> <td>0.22</td> <td>-0.40</td> <td>1.00</td> <td>1.50</td> <td>0.50</td> <td>-0.29</td> <td>-0.24</td> <td>0.50</td> <td>1.50</td> <td>-0.25</td> <td>0.50</td> <td>-0.57</td> <td>1.50</td> <td>1.50</td> <td>-0.26</td> <td>1.50</td> <td>-0.25</td> <td>1.50</td> <td>-0.24</td> <td>-0.34</td> <td>1.50</td> <td>1.50</td> <td>0.50</td> </tr> <tr> <td>Ion-type</td> <td>PR</td> <td>LI</td> <td>LI</td> <td>F</td> <td>y1</td> <td>b2</td> <td>y3-NH3</td> <td>y3</td> <td>b4</td> <td>y4</td> <td>y5</td> <td>y6</td> <td>y7</td> <td>y8</td> <td>y9</td> <td>y10</td> <td>b10</td> <td>y11</td> <td>y12</td> <td>y13</td> <td>y14</td> <td>y15</td> <td>y16</td> <td>y17</td> <td>y18</td> </tr> <tr> <td>Delta ppm</td> <td>-13.2</td> <td></td> <td>-14.2</td> <td></td> <td>-2.3</td> <td>1.4</td> <td>19.0</td> <td></td> <td></td> <td>36.3</td> <td></td> <td></td> <td>23.7</td> <td></td> <td>-6.6</td> <td>7.1</td> <td></td> <td>9.7</td> <td></td> <td>2.9</td> <td></td> <td></td> <td>4.5</td> <td>13.3</td> <td>3.4</td> </tr> </tbody> </table> |        |         |        |                  |                                                     |                                 |                            |                             |                      |         |                        |                        |                                 | Fragment-ion (m/z) | 70.064  | 72.081  | 86.095  | 110.069 | 120.081               | 175.119 | 247.081 | 251.067 | 304.144 | 342.190  | 359.204  | 414.125 | 432.166 | 457.254 | 472.285 | 585.376 | 680.373 | 698.463 | 716.309 <sup>+2</sup> | 827.501 | 900.451 | 968.900 | 974.571 | 1045.618 | 1118.560 | Frac. Inten. (% of TIC) | 0.01 | 5.13 | 0.38 | 4.44 | 0.14 | 4.00 | 3.40 | 3.15 | 2.65 | 3.67 | 10.98 | 2.79 | 2.72 | 6.28 | 6.73 | 4.46 | 2.81 | 3.98 | 2.76 | 4.95 | 2.85 | 3.77 | 9.00 | 6.36 | 2.78 | Rel. Inten. (% of BP) | 0.07 | 46.70 | 3.50 | 40.46 | 1.25 | 36.45 | 30.97 | 28.66 | 24.17 | 33.38 | 100.00 | 25.38 | 24.77 | 57.21 | 61.33 | 40.63 | 25.63 | 36.24 | 25.18 | 46.08 | 24.17 | 34.36 | 81.06 | 57.87 | 25.29 | Score | 0.20 | -0.47 | 0.22 | -0.40 | 1.00 | 1.50 | 0.50 | -0.29 | -0.24 | 0.50 | 1.50 | -0.25 | 0.50 | -0.57 | 1.50 | 1.50 | -0.26 | 1.50 | -0.25 | 1.50 | -0.24 | -0.34 | 1.50 | 1.50 | 0.50 | Ion-type | PR | LI | LI | F | y1 | b2 | y3-NH3 | y3 | b4 | y4 | y5 | y6 | y7 | y8 | y9 | y10 | b10 | y11 | y12 | y13 | y14 | y15 | y16 | y17 | y18 | Delta ppm | -13.2 |  | -14.2 |  | -2.3 | 1.4 | 19.0 |  |  | 36.3 |  |  | 23.7 |  | -6.6 | 7.1 |  | 9.7 |  | 2.9 |  |  | 4.5 | 13.3 | 3.4 |
| Fragment-ion (m/z)                                                                                                                                                                                                                                                                                                                                                                                                                                                                                                                                                                                                                                                                                                                                                                                                                                                                                                                                                                                                                                                                                                                                                                                                                                                                                                                                                                                                                                                                                                                                                                                                                                                                                                                                                                                                                                                                                                                                                                                                                                                                                                                                                                                                                                                                                                                                                                                                                                                                                      | 70.064 | 72.081  | 86.095 | 110.069          | 120.081                                             | 175.119                         | 247.081                    | 251.067                     | 304.144              | 342.190 | 359.204                | 414.125                | 432.166                         | 457.254            | 472.285 | 585.376 | 680.373 | 698.463 | 716.309 <sup>+2</sup> | 827.501 | 900.451 | 968.900 | 974.571 | 1045.618 | 1118.560 |         |         |         |         |         |         |         |                       |         |         |         |         |          |          |                         |      |      |      |      |      |      |      |      |      |      |       |      |      |      |      |      |      |      |      |      |      |      |      |      |      |                       |      |       |      |       |      |       |       |       |       |       |        |       |       |       |       |       |       |       |       |       |       |       |       |       |       |       |      |       |      |       |      |      |      |       |       |      |      |       |      |       |      |      |       |      |       |      |       |       |      |      |      |          |    |    |    |   |    |    |        |    |    |    |    |    |    |    |    |     |     |     |     |     |     |     |     |     |     |           |       |  |       |  |      |     |      |  |  |      |  |  |      |  |      |     |  |     |  |     |  |  |     |      |     |
| Frac. Inten. (% of TIC)                                                                                                                                                                                                                                                                                                                                                                                                                                                                                                                                                                                                                                                                                                                                                                                                                                                                                                                                                                                                                                                                                                                                                                                                                                                                                                                                                                                                                                                                                                                                                                                                                                                                                                                                                                                                                                                                                                                                                                                                                                                                                                                                                                                                                                                                                                                                                                                                                                                                                 | 0.01   | 5.13    | 0.38   | 4.44             | 0.14                                                | 4.00                            | 3.40                       | 3.15                        | 2.65                 | 3.67    | 10.98                  | 2.79                   | 2.72                            | 6.28               | 6.73    | 4.46    | 2.81    | 3.98    | 2.76                  | 4.95    | 2.85    | 3.77    | 9.00    | 6.36     | 2.78     |         |         |         |         |         |         |         |                       |         |         |         |         |          |          |                         |      |      |      |      |      |      |      |      |      |      |       |      |      |      |      |      |      |      |      |      |      |      |      |      |      |                       |      |       |      |       |      |       |       |       |       |       |        |       |       |       |       |       |       |       |       |       |       |       |       |       |       |       |      |       |      |       |      |      |      |       |       |      |      |       |      |       |      |      |       |      |       |      |       |       |      |      |      |          |    |    |    |   |    |    |        |    |    |    |    |    |    |    |    |     |     |     |     |     |     |     |     |     |     |           |       |  |       |  |      |     |      |  |  |      |  |  |      |  |      |     |  |     |  |     |  |  |     |      |     |
| Rel. Inten. (% of BP)                                                                                                                                                                                                                                                                                                                                                                                                                                                                                                                                                                                                                                                                                                                                                                                                                                                                                                                                                                                                                                                                                                                                                                                                                                                                                                                                                                                                                                                                                                                                                                                                                                                                                                                                                                                                                                                                                                                                                                                                                                                                                                                                                                                                                                                                                                                                                                                                                                                                                   | 0.07   | 46.70   | 3.50   | 40.46            | 1.25                                                | 36.45                           | 30.97                      | 28.66                       | 24.17                | 33.38   | 100.00                 | 25.38                  | 24.77                           | 57.21              | 61.33   | 40.63   | 25.63   | 36.24   | 25.18                 | 46.08   | 24.17   | 34.36   | 81.06   | 57.87    | 25.29    |         |         |         |         |         |         |         |                       |         |         |         |         |          |          |                         |      |      |      |      |      |      |      |      |      |      |       |      |      |      |      |      |      |      |      |      |      |      |      |      |      |                       |      |       |      |       |      |       |       |       |       |       |        |       |       |       |       |       |       |       |       |       |       |       |       |       |       |       |      |       |      |       |      |      |      |       |       |      |      |       |      |       |      |      |       |      |       |      |       |       |      |      |      |          |    |    |    |   |    |    |        |    |    |    |    |    |    |    |    |     |     |     |     |     |     |     |     |     |     |           |       |  |       |  |      |     |      |  |  |      |  |  |      |  |      |     |  |     |  |     |  |  |     |      |     |
| Score                                                                                                                                                                                                                                                                                                                                                                                                                                                                                                                                                                                                                                                                                                                                                                                                                                                                                                                                                                                                                                                                                                                                                                                                                                                                                                                                                                                                                                                                                                                                                                                                                                                                                                                                                                                                                                                                                                                                                                                                                                                                                                                                                                                                                                                                                                                                                                                                                                                                                                   | 0.20   | -0.47   | 0.22   | -0.40            | 1.00                                                | 1.50                            | 0.50                       | -0.29                       | -0.24                | 0.50    | 1.50                   | -0.25                  | 0.50                            | -0.57              | 1.50    | 1.50    | -0.26   | 1.50    | -0.25                 | 1.50    | -0.24   | -0.34   | 1.50    | 1.50     | 0.50     |         |         |         |         |         |         |         |                       |         |         |         |         |          |          |                         |      |      |      |      |      |      |      |      |      |      |       |      |      |      |      |      |      |      |      |      |      |      |      |      |      |                       |      |       |      |       |      |       |       |       |       |       |        |       |       |       |       |       |       |       |       |       |       |       |       |       |       |       |      |       |      |       |      |      |      |       |       |      |      |       |      |       |      |      |       |      |       |      |       |       |      |      |      |          |    |    |    |   |    |    |        |    |    |    |    |    |    |    |    |     |     |     |     |     |     |     |     |     |     |           |       |  |       |  |      |     |      |  |  |      |  |  |      |  |      |     |  |     |  |     |  |  |     |      |     |
| Ion-type                                                                                                                                                                                                                                                                                                                                                                                                                                                                                                                                                                                                                                                                                                                                                                                                                                                                                                                                                                                                                                                                                                                                                                                                                                                                                                                                                                                                                                                                                                                                                                                                                                                                                                                                                                                                                                                                                                                                                                                                                                                                                                                                                                                                                                                                                                                                                                                                                                                                                                | PR     | LI      | LI     | F                | y1                                                  | b2                              | y3-NH3                     | y3                          | b4                   | y4      | y5                     | y6                     | y7                              | y8                 | y9      | y10     | b10     | y11     | y12                   | y13     | y14     | y15     | y16     | y17      | y18      |         |         |         |         |         |         |         |                       |         |         |         |         |          |          |                         |      |      |      |      |      |      |      |      |      |      |       |      |      |      |      |      |      |      |      |      |      |      |      |      |      |                       |      |       |      |       |      |       |       |       |       |       |        |       |       |       |       |       |       |       |       |       |       |       |       |       |       |       |      |       |      |       |      |      |      |       |       |      |      |       |      |       |      |      |       |      |       |      |       |       |      |      |      |          |    |    |    |   |    |    |        |    |    |    |    |    |    |    |    |     |     |     |     |     |     |     |     |     |     |           |       |  |       |  |      |     |      |  |  |      |  |  |      |  |      |     |  |     |  |     |  |  |     |      |     |
| Delta ppm                                                                                                                                                                                                                                                                                                                                                                                                                                                                                                                                                                                                                                                                                                                                                                                                                                                                                                                                                                                                                                                                                                                                                                                                                                                                                                                                                                                                                                                                                                                                                                                                                                                                                                                                                                                                                                                                                                                                                                                                                                                                                                                                                                                                                                                                                                                                                                                                                                                                                               | -13.2  |         | -14.2  |                  | -2.3                                                | 1.4                             | 19.0                       |                             |                      | 36.3    |                        |                        | 23.7                            |                    | -6.6    | 7.1     |         | 9.7     |                       | 2.9     |         |         | 4.5     | 13.3     | 3.4      |         |         |         |         |         |         |         |                       |         |         |         |         |          |          |                         |      |      |      |      |      |      |      |      |      |      |       |      |      |      |      |      |      |      |      |      |      |      |      |      |      |                       |      |       |      |       |      |       |       |       |       |       |        |       |       |       |       |       |       |       |       |       |       |       |       |       |       |       |      |       |      |       |      |      |      |       |       |      |      |       |      |       |      |      |       |      |       |      |       |       |      |      |      |          |    |    |    |   |    |    |        |    |    |    |    |    |    |    |    |     |     |     |     |     |     |     |     |     |     |           |       |  |       |  |      |     |      |  |  |      |  |  |      |  |      |     |  |     |  |     |  |  |     |      |     |

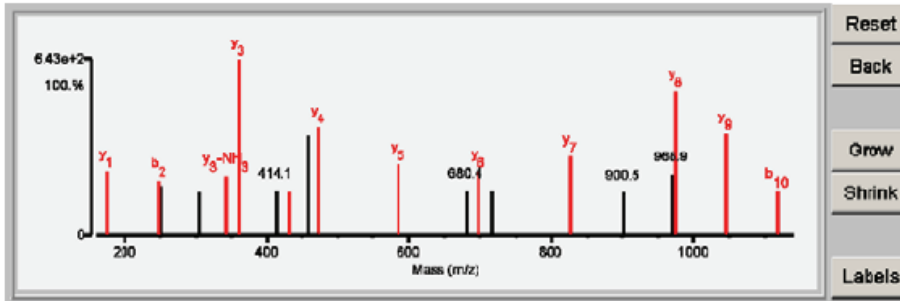

# I106

## Detailed Results

| Rank                                                                                                                                                                                                                                                                                                                                                                                                                                                                                                                                                                                                                                                                                                                                                                                                                                                                                                                                                                                                                                                                                                                                                                                                                                                                                                                                                                                                                                                                                                                                                                                                                                                                                                                                                                                                                                                                                                                                                                                                                                                                                                                                                                                                                                                                                                                                                                                                                                                                                        | Score  | SPI (%) | BCS    | # Unmatched Ions | Sequence                          | MH <sup>+</sup> Calculated (Da) | MH <sup>+</sup> Error (Da) | MH <sup>+</sup> Error (ppm) | Protein MW (pl) (Da) | Species | Accession #            | MS-Digest Index #      | Protein Name                    |                    |         |         |         |         |                       |         |         |         |         |         |         |         |         |         |         |         |         |         |                       |         |         |         |         |         |         |                         |      |      |      |      |      |      |      |      |      |      |      |      |      |      |      |       |       |      |      |      |      |      |       |      |      |                       |      |      |      |      |      |      |      |       |      |      |       |      |      |      |      |       |       |      |      |       |      |       |        |       |       |       |      |      |       |       |       |      |      |      |       |       |      |      |      |      |      |       |      |      |      |      |      |      |      |      |      |          |    |    |    |   |    |    |       |       |    |    |    |        |    |    |        |    |    |    |    |    |    |    |     |     |     |           |      |     |  |  |  |     |      |     |  |     |      |     |     |      |     |      |  |      |     |      |     |     |     |     |
|---------------------------------------------------------------------------------------------------------------------------------------------------------------------------------------------------------------------------------------------------------------------------------------------------------------------------------------------------------------------------------------------------------------------------------------------------------------------------------------------------------------------------------------------------------------------------------------------------------------------------------------------------------------------------------------------------------------------------------------------------------------------------------------------------------------------------------------------------------------------------------------------------------------------------------------------------------------------------------------------------------------------------------------------------------------------------------------------------------------------------------------------------------------------------------------------------------------------------------------------------------------------------------------------------------------------------------------------------------------------------------------------------------------------------------------------------------------------------------------------------------------------------------------------------------------------------------------------------------------------------------------------------------------------------------------------------------------------------------------------------------------------------------------------------------------------------------------------------------------------------------------------------------------------------------------------------------------------------------------------------------------------------------------------------------------------------------------------------------------------------------------------------------------------------------------------------------------------------------------------------------------------------------------------------------------------------------------------------------------------------------------------------------------------------------------------------------------------------------------------|--------|---------|--------|------------------|-----------------------------------|---------------------------------|----------------------------|-----------------------------|----------------------|---------|------------------------|------------------------|---------------------------------|--------------------|---------|---------|---------|---------|-----------------------|---------|---------|---------|---------|---------|---------|---------|---------|---------|---------|---------|---------|---------|-----------------------|---------|---------|---------|---------|---------|---------|-------------------------|------|------|------|------|------|------|------|------|------|------|------|------|------|------|------|-------|-------|------|------|------|------|------|-------|------|------|-----------------------|------|------|------|------|------|------|------|-------|------|------|-------|------|------|------|------|-------|-------|------|------|-------|------|-------|--------|-------|-------|-------|------|------|-------|-------|-------|------|------|------|-------|-------|------|------|------|------|------|-------|------|------|------|------|------|------|------|------|------|----------|----|----|----|---|----|----|-------|-------|----|----|----|--------|----|----|--------|----|----|----|----|----|----|----|-----|-----|-----|-----------|------|-----|--|--|--|-----|------|-----|--|-----|------|-----|-----|------|-----|------|--|------|-----|------|-----|-----|-----|-----|
| 1                                                                                                                                                                                                                                                                                                                                                                                                                                                                                                                                                                                                                                                                                                                                                                                                                                                                                                                                                                                                                                                                                                                                                                                                                                                                                                                                                                                                                                                                                                                                                                                                                                                                                                                                                                                                                                                                                                                                                                                                                                                                                                                                                                                                                                                                                                                                                                                                                                                                                           | 16.80  | 84.7    | 6      | 8/26             | (F) E / L / I / L / S / P / R (S) | 916.4988                        | 0.0169                     | 17.4                        | 17302.6/5.76         | HUMAN   | <a href="#">P16948</a> | <a href="#">610899</a> | Stathmin - Homo sapiens (Human) |                    |         |         |         |         |                       |         |         |         |         |         |         |         |         |         |         |         |         |         |                       |         |         |         |         |         |         |                         |      |      |      |      |      |      |      |      |      |      |      |      |      |      |      |       |       |      |      |      |      |      |       |      |      |                       |      |      |      |      |      |      |      |       |      |      |       |      |      |      |      |       |       |      |      |       |      |       |        |       |       |       |      |      |       |       |       |      |      |      |       |       |      |      |      |      |      |       |      |      |      |      |      |      |      |      |      |          |    |    |    |   |    |    |       |       |    |    |    |        |    |    |        |    |    |    |    |    |    |    |     |     |     |           |      |     |  |  |  |     |      |     |  |     |      |     |     |      |     |      |  |      |     |      |     |     |     |     |
| <table border="1"> <thead> <tr> <th>Fragment-ion (m/z)</th> <th>70.088</th> <th>86.097</th> <th>87.100</th> <th>108.033</th> <th>172.046</th> <th>176.120</th> <th>180.063</th> <th>198.182</th> <th>200.186</th> <th>212.163</th> <th>218.050</th> <th>227.178</th> <th>255.148</th> <th>272.173</th> <th>303.188</th> <th>323.088</th> <th>331.136</th> <th>342.182</th> <th>348.730<sup>+2</sup></th> <th>368.208</th> <th>418.221</th> <th>444.220</th> <th>472.280</th> <th>686.374</th> <th>888.462</th> </tr> </thead> <tbody> <tr> <td>Frac. Inten. (% of TIC)</td> <td>0.00</td> <td>0.82</td> <td>1.68</td> <td>0.68</td> <td>1.46</td> <td>1.69</td> <td>2.13</td> <td>4.51</td> <td>0.69</td> <td>0.64</td> <td>3.95</td> <td>1.93</td> <td>2.58</td> <td>1.75</td> <td>1.39</td> <td>10.14</td> <td>10.09</td> <td>0.88</td> <td>1.01</td> <td>7.94</td> <td>0.63</td> <td>3.17</td> <td>26.75</td> <td>9.35</td> <td>4.16</td> </tr> <tr> <td>Rel. Inten. (% of BP)</td> <td>0.00</td> <td>3.05</td> <td>6.30</td> <td>2.53</td> <td>5.46</td> <td>6.30</td> <td>7.95</td> <td>16.86</td> <td>2.59</td> <td>2.37</td> <td>14.75</td> <td>7.20</td> <td>9.66</td> <td>6.53</td> <td>5.18</td> <td>37.89</td> <td>37.72</td> <td>3.30</td> <td>3.76</td> <td>29.69</td> <td>2.37</td> <td>11.84</td> <td>100.00</td> <td>34.96</td> <td>15.54</td> </tr> <tr> <td>Score</td> <td>0.20</td> <td>0.22</td> <td>-0.06</td> <td>-0.03</td> <td>-0.05</td> <td>1.50</td> <td>0.50</td> <td>0.50</td> <td>-0.03</td> <td>-0.02</td> <td>0.50</td> <td>0.75</td> <td>0.50</td> <td>1.50</td> <td>0.50</td> <td>-0.38</td> <td>0.50</td> <td>0.50</td> <td>1.50</td> <td>1.50</td> <td>0.50</td> <td>0.50</td> <td>1.50</td> <td>1.50</td> <td>1.50</td> </tr> <tr> <td>Ion-type</td> <td>PR</td> <td>LI</td> <td>LI</td> <td>F</td> <td>y1</td> <td>b1</td> <td>IL-28</td> <td>IL-28</td> <td>b1</td> <td>IL</td> <td>IL</td> <td>y2-NH3</td> <td>y2</td> <td>b2</td> <td>y3-NH3</td> <td>y3</td> <td>y4</td> <td>y5</td> <td>y6</td> <td>y7</td> <td>y8</td> <td>y9</td> <td>y10</td> <td>y11</td> <td>y12</td> </tr> <tr> <td>Delta ppm</td> <td>12.5</td> <td>7.8</td> <td></td> <td></td> <td></td> <td>6.0</td> <td>-4.9</td> <td>0.6</td> <td></td> <td>4.3</td> <td>-2.2</td> <td>3.3</td> <td>6.6</td> <td>-2.6</td> <td>4.8</td> <td>14.3</td> <td></td> <td>-4.3</td> <td>6.0</td> <td>-4.2</td> <td>6.1</td> <td>5.1</td> <td>3.8</td> <td>8.3</td> </tr> </tbody> </table> |        |         |        |                  |                                   |                                 |                            |                             |                      |         |                        |                        |                                 | Fragment-ion (m/z) | 70.088  | 86.097  | 87.100  | 108.033 | 172.046               | 176.120 | 180.063 | 198.182 | 200.186 | 212.163 | 218.050 | 227.178 | 255.148 | 272.173 | 303.188 | 323.088 | 331.136 | 342.182 | 348.730 <sup>+2</sup> | 368.208 | 418.221 | 444.220 | 472.280 | 686.374 | 888.462 | Frac. Inten. (% of TIC) | 0.00 | 0.82 | 1.68 | 0.68 | 1.46 | 1.69 | 2.13 | 4.51 | 0.69 | 0.64 | 3.95 | 1.93 | 2.58 | 1.75 | 1.39 | 10.14 | 10.09 | 0.88 | 1.01 | 7.94 | 0.63 | 3.17 | 26.75 | 9.35 | 4.16 | Rel. Inten. (% of BP) | 0.00 | 3.05 | 6.30 | 2.53 | 5.46 | 6.30 | 7.95 | 16.86 | 2.59 | 2.37 | 14.75 | 7.20 | 9.66 | 6.53 | 5.18 | 37.89 | 37.72 | 3.30 | 3.76 | 29.69 | 2.37 | 11.84 | 100.00 | 34.96 | 15.54 | Score | 0.20 | 0.22 | -0.06 | -0.03 | -0.05 | 1.50 | 0.50 | 0.50 | -0.03 | -0.02 | 0.50 | 0.75 | 0.50 | 1.50 | 0.50 | -0.38 | 0.50 | 0.50 | 1.50 | 1.50 | 0.50 | 0.50 | 1.50 | 1.50 | 1.50 | Ion-type | PR | LI | LI | F | y1 | b1 | IL-28 | IL-28 | b1 | IL | IL | y2-NH3 | y2 | b2 | y3-NH3 | y3 | y4 | y5 | y6 | y7 | y8 | y9 | y10 | y11 | y12 | Delta ppm | 12.5 | 7.8 |  |  |  | 6.0 | -4.9 | 0.6 |  | 4.3 | -2.2 | 3.3 | 6.6 | -2.6 | 4.8 | 14.3 |  | -4.3 | 6.0 | -4.2 | 6.1 | 5.1 | 3.8 | 8.3 |
| Fragment-ion (m/z)                                                                                                                                                                                                                                                                                                                                                                                                                                                                                                                                                                                                                                                                                                                                                                                                                                                                                                                                                                                                                                                                                                                                                                                                                                                                                                                                                                                                                                                                                                                                                                                                                                                                                                                                                                                                                                                                                                                                                                                                                                                                                                                                                                                                                                                                                                                                                                                                                                                                          | 70.088 | 86.097  | 87.100 | 108.033          | 172.046                           | 176.120                         | 180.063                    | 198.182                     | 200.186              | 212.163 | 218.050                | 227.178                | 255.148                         | 272.173            | 303.188 | 323.088 | 331.136 | 342.182 | 348.730 <sup>+2</sup> | 368.208 | 418.221 | 444.220 | 472.280 | 686.374 | 888.462 |         |         |         |         |         |         |         |                       |         |         |         |         |         |         |                         |      |      |      |      |      |      |      |      |      |      |      |      |      |      |      |       |       |      |      |      |      |      |       |      |      |                       |      |      |      |      |      |      |      |       |      |      |       |      |      |      |      |       |       |      |      |       |      |       |        |       |       |       |      |      |       |       |       |      |      |      |       |       |      |      |      |      |      |       |      |      |      |      |      |      |      |      |      |          |    |    |    |   |    |    |       |       |    |    |    |        |    |    |        |    |    |    |    |    |    |    |     |     |     |           |      |     |  |  |  |     |      |     |  |     |      |     |     |      |     |      |  |      |     |      |     |     |     |     |
| Frac. Inten. (% of TIC)                                                                                                                                                                                                                                                                                                                                                                                                                                                                                                                                                                                                                                                                                                                                                                                                                                                                                                                                                                                                                                                                                                                                                                                                                                                                                                                                                                                                                                                                                                                                                                                                                                                                                                                                                                                                                                                                                                                                                                                                                                                                                                                                                                                                                                                                                                                                                                                                                                                                     | 0.00   | 0.82    | 1.68   | 0.68             | 1.46                              | 1.69                            | 2.13                       | 4.51                        | 0.69                 | 0.64    | 3.95                   | 1.93                   | 2.58                            | 1.75               | 1.39    | 10.14   | 10.09   | 0.88    | 1.01                  | 7.94    | 0.63    | 3.17    | 26.75   | 9.35    | 4.16    |         |         |         |         |         |         |         |                       |         |         |         |         |         |         |                         |      |      |      |      |      |      |      |      |      |      |      |      |      |      |      |       |       |      |      |      |      |      |       |      |      |                       |      |      |      |      |      |      |      |       |      |      |       |      |      |      |      |       |       |      |      |       |      |       |        |       |       |       |      |      |       |       |       |      |      |      |       |       |      |      |      |      |      |       |      |      |      |      |      |      |      |      |      |          |    |    |    |   |    |    |       |       |    |    |    |        |    |    |        |    |    |    |    |    |    |    |     |     |     |           |      |     |  |  |  |     |      |     |  |     |      |     |     |      |     |      |  |      |     |      |     |     |     |     |
| Rel. Inten. (% of BP)                                                                                                                                                                                                                                                                                                                                                                                                                                                                                                                                                                                                                                                                                                                                                                                                                                                                                                                                                                                                                                                                                                                                                                                                                                                                                                                                                                                                                                                                                                                                                                                                                                                                                                                                                                                                                                                                                                                                                                                                                                                                                                                                                                                                                                                                                                                                                                                                                                                                       | 0.00   | 3.05    | 6.30   | 2.53             | 5.46                              | 6.30                            | 7.95                       | 16.86                       | 2.59                 | 2.37    | 14.75                  | 7.20                   | 9.66                            | 6.53               | 5.18    | 37.89   | 37.72   | 3.30    | 3.76                  | 29.69   | 2.37    | 11.84   | 100.00  | 34.96   | 15.54   |         |         |         |         |         |         |         |                       |         |         |         |         |         |         |                         |      |      |      |      |      |      |      |      |      |      |      |      |      |      |      |       |       |      |      |      |      |      |       |      |      |                       |      |      |      |      |      |      |      |       |      |      |       |      |      |      |      |       |       |      |      |       |      |       |        |       |       |       |      |      |       |       |       |      |      |      |       |       |      |      |      |      |      |       |      |      |      |      |      |      |      |      |      |          |    |    |    |   |    |    |       |       |    |    |    |        |    |    |        |    |    |    |    |    |    |    |     |     |     |           |      |     |  |  |  |     |      |     |  |     |      |     |     |      |     |      |  |      |     |      |     |     |     |     |
| Score                                                                                                                                                                                                                                                                                                                                                                                                                                                                                                                                                                                                                                                                                                                                                                                                                                                                                                                                                                                                                                                                                                                                                                                                                                                                                                                                                                                                                                                                                                                                                                                                                                                                                                                                                                                                                                                                                                                                                                                                                                                                                                                                                                                                                                                                                                                                                                                                                                                                                       | 0.20   | 0.22    | -0.06  | -0.03            | -0.05                             | 1.50                            | 0.50                       | 0.50                        | -0.03                | -0.02   | 0.50                   | 0.75                   | 0.50                            | 1.50               | 0.50    | -0.38   | 0.50    | 0.50    | 1.50                  | 1.50    | 0.50    | 0.50    | 1.50    | 1.50    | 1.50    |         |         |         |         |         |         |         |                       |         |         |         |         |         |         |                         |      |      |      |      |      |      |      |      |      |      |      |      |      |      |      |       |       |      |      |      |      |      |       |      |      |                       |      |      |      |      |      |      |      |       |      |      |       |      |      |      |      |       |       |      |      |       |      |       |        |       |       |       |      |      |       |       |       |      |      |      |       |       |      |      |      |      |      |       |      |      |      |      |      |      |      |      |      |          |    |    |    |   |    |    |       |       |    |    |    |        |    |    |        |    |    |    |    |    |    |    |     |     |     |           |      |     |  |  |  |     |      |     |  |     |      |     |     |      |     |      |  |      |     |      |     |     |     |     |
| Ion-type                                                                                                                                                                                                                                                                                                                                                                                                                                                                                                                                                                                                                                                                                                                                                                                                                                                                                                                                                                                                                                                                                                                                                                                                                                                                                                                                                                                                                                                                                                                                                                                                                                                                                                                                                                                                                                                                                                                                                                                                                                                                                                                                                                                                                                                                                                                                                                                                                                                                                    | PR     | LI      | LI     | F                | y1                                | b1                              | IL-28                      | IL-28                       | b1                   | IL      | IL                     | y2-NH3                 | y2                              | b2                 | y3-NH3  | y3      | y4      | y5      | y6                    | y7      | y8      | y9      | y10     | y11     | y12     |         |         |         |         |         |         |         |                       |         |         |         |         |         |         |                         |      |      |      |      |      |      |      |      |      |      |      |      |      |      |      |       |       |      |      |      |      |      |       |      |      |                       |      |      |      |      |      |      |      |       |      |      |       |      |      |      |      |       |       |      |      |       |      |       |        |       |       |       |      |      |       |       |       |      |      |      |       |       |      |      |      |      |      |       |      |      |      |      |      |      |      |      |      |          |    |    |    |   |    |    |       |       |    |    |    |        |    |    |        |    |    |    |    |    |    |    |     |     |     |           |      |     |  |  |  |     |      |     |  |     |      |     |     |      |     |      |  |      |     |      |     |     |     |     |
| Delta ppm                                                                                                                                                                                                                                                                                                                                                                                                                                                                                                                                                                                                                                                                                                                                                                                                                                                                                                                                                                                                                                                                                                                                                                                                                                                                                                                                                                                                                                                                                                                                                                                                                                                                                                                                                                                                                                                                                                                                                                                                                                                                                                                                                                                                                                                                                                                                                                                                                                                                                   | 12.5   | 7.8     |        |                  |                                   | 6.0                             | -4.9                       | 0.6                         |                      | 4.3     | -2.2                   | 3.3                    | 6.6                             | -2.6               | 4.8     | 14.3    |         | -4.3    | 6.0                   | -4.2    | 6.1     | 5.1     | 3.8     | 8.3     |         |         |         |         |         |         |         |         |                       |         |         |         |         |         |         |                         |      |      |      |      |      |      |      |      |      |      |      |      |      |      |      |       |       |      |      |      |      |      |       |      |      |                       |      |      |      |      |      |      |      |       |      |      |       |      |      |      |      |       |       |      |      |       |      |       |        |       |       |       |      |      |       |       |       |      |      |      |       |       |      |      |      |      |      |       |      |      |      |      |      |      |      |      |      |          |    |    |    |   |    |    |       |       |    |    |    |        |    |    |        |    |    |    |    |    |    |    |     |     |     |           |      |     |  |  |  |     |      |     |  |     |      |     |     |      |     |      |  |      |     |      |     |     |     |     |

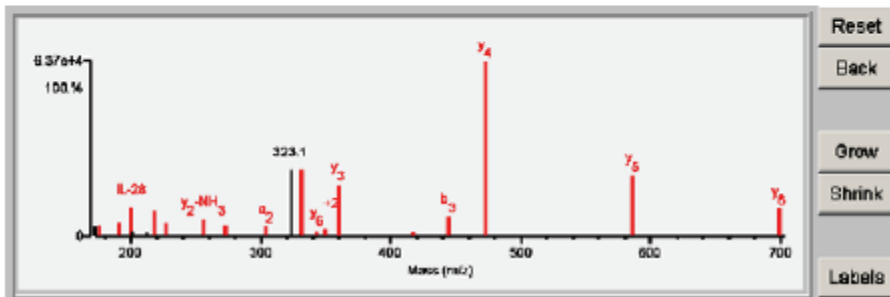

# I107

## Detailed Results

| Rank                    | Score  | SPI (%) | BCS    | # Unmatched Ions | Sequence                                           | MH <sup>+</sup> Calculated (Da) | MH <sup>+</sup> Error (Da) | MH <sup>+</sup> Error (ppm) | Protein MW/pI (Da) | Species | Accession #            | MS-Digest Index #      | Protein Name                                            |                       |         |         |         |                       |         |         |         |         |          |          |          |
|-------------------------|--------|---------|--------|------------------|----------------------------------------------------|---------------------------------|----------------------------|-----------------------------|--------------------|---------|------------------------|------------------------|---------------------------------------------------------|-----------------------|---------|---------|---------|-----------------------|---------|---------|---------|---------|----------|----------|----------|
| 1                       | 13.06  | 57.3    | 8      | 8/25             | (N)I V A Y H D S I V N I P D / Y / N / E / F R (Q) | 2418.0893                       | 0.0048                     | 2.0                         | 71224.0/5.15       | HUMAN   | <a href="#">Q9UBT2</a> | <a href="#">582835</a> | SUMO-activating enzyme subunit 2 - Homo sapiens (Human) |                       |         |         |         |                       |         |         |         |         |          |          |          |
| Fragment-ion (m/z)      | 70.066 | 72.083  | 86.096 | 87.056           | 136.074                                            | 169.131                         | 185.160                    | 213.088                     | 269.125            | 469.247 | 490.218                | 593.779 <sup>+2</sup>  | 598.294                                                 | 630.328 <sup>+2</sup> | 697.370 | 717.826 | 719.309 | 728.389 <sup>+2</sup> | 811.408 | 892.456 | 974.472 | 987.467 | 1118.489 | 1186.541 | 1232.545 |
| Frac. Inten. (% of TIC) | 0.01   | 0.12    | 0.20   | 0.08             | 0.11                                               | 2.53                            | 4.35                       | 3.91                        | 2.60               | 2.72    | 2.89                   | 13.52                  | 5.75                                                    | 7.49                  | 2.87    | 3.01    | 2.89    | 15.81                 | 2.85    | 4.00    | 5.41    | 2.89    | 4.25     | 6.76     | 2.99     |
| Rel. Inten. (% of BP)   | 0.04   | 0.73    | 1.28   | 0.51             | 0.69                                               | 16.02                           | 27.50                      | 24.73                       | 16.43              | 17.17   | 18.25                  | 85.53                  | 36.34                                                   | 47.38                 | 18.17   | 19.03   | 18.29   | 100.00                | 18.02   | 25.27   | 34.24   | 18.24   | 28.89    | 42.73    | 18.90    |
| Score                   | 0.20   | 0.50    | 0.22   | 0.33             | 1.00                                               | -0.16                           | -0.28                      | 0.75                        | -0.16              | 1.50    | 0.75                   | 1.50                   | 1.50                                                    | -0.47                 | 1.50    | -0.19   | -0.18   | -1.00                 | 1.50    | -0.25   | 1.50    | 0.50    | 0.50     | 1.50     | 0.50     |
| Ion-type                | PR     | V       | LI     | NR               | Y                                                  |                                 |                            | PD                          |                    | y3      | NVEF                   | y <sup>9+2</sup>       | y <sup>4</sup>                                          |                       | y5      |         |         |                       | y6      | y7      | b8      | b9      | y9       | b10      |          |
| Delta ppm               | 8.2    | 36.4    | -4.9   | 11.6             | -14.6                                              |                                 |                            | -1.3                        |                    | -17.9   | -26.2                  | -1.0                   | -7.5                                                    |                       | 4.0     |         |         | -1.6                  |         | -1.4    | 5.2     | -11.4   | -9.6     | -0.1     |          |

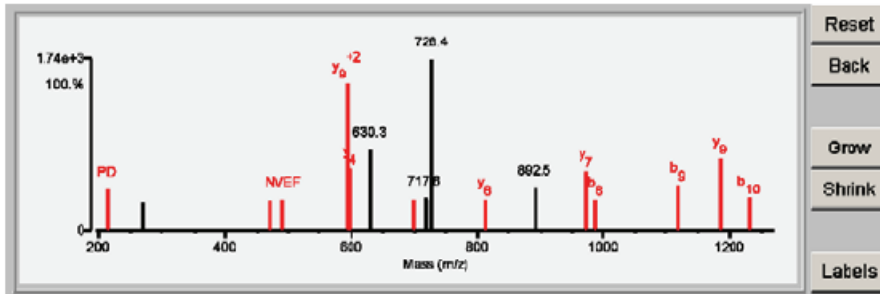

# I108

## Detailed Results

| Rank                    | Score  | SPI (%) | BCS     | # Unmatched Ions | Sequence                                             | MH <sup>+</sup> Calculated (Da) | MH <sup>+</sup> Error (Da) | MH <sup>+</sup> Error (ppm) | Protein MW/pI (Da) | Species | Accession #            | MS-Digest Index #      | Protein Name                       |         |         |         |          |          |          |          |          |          |          |          |          |
|-------------------------|--------|---------|---------|------------------|------------------------------------------------------|---------------------------------|----------------------------|-----------------------------|--------------------|---------|------------------------|------------------------|------------------------------------|---------|---------|---------|----------|----------|----------|----------|----------|----------|----------|----------|----------|
| 1                       | 10.01  | 67.2    | 5       | 15/25            | (E)D I V F E T D H / I / L / E S L Y R D / I / R (D) | 2322.1435                       | -0.0059                    | -2.6                        | 33196.0/6.11       | HUMAN   | <a href="#">O75558</a> | <a href="#">611359</a> | Syntaxin-11 - Homo sapiens (Human) |         |         |         |          |          |          |          |          |          |          |          |          |
| Fragment-ion (m/z)      | 86.094 | 120.081 | 175.119 | 219.149          | 247.144                                              | 248.148                         | 288.197                    | 360.225                     | 434.200            | 548.204 | 606.284                | 662.397                | 663.196                            | 759.310 | 825.464 | 907.362 | 1022.431 | 1040.418 | 1051.555 | 1052.133 | 1135.490 | 1164.634 | 1266.558 | 1267.574 | 1277.710 |
| Frac. Inten. (% of TIC) | 0.04   | 0.05    | 2.03    | 2.81             | 3.73                                                 | 1.44                            | 1.11                       | 2.87                        | 1.30               | 3.45    | 1.87                   | 2.17                   | 1.07                               | 1.63    | 1.11    | 3.68    | 1.63     | 3.66     | 45.77    | 1.56     | 1.91     | 7.04     | 1.15     | 5.16     | 1.95     |
| Rel. Inten. (% of BP)   | 0.09   | 0.10    | 4.44    | 5.70             | 8.15                                                 | 3.14                            | 2.42                       | 6.27                        | 2.85               | 7.53    | 4.09                   | 4.75                   | 2.35                               | 3.56    | 2.43    | 8.03    | 3.57     | 8.01     | 100.00   | 3.41     | 4.16     | 15.37    | 2.51     | 11.28    | 4.27     |
| Score                   | 0.22   | 1.00    | 1.50    | 0.50             | 0.75                                                 | -0.03                           | 1.50                       | 0.75                        | -0.03              | -0.08   | -0.04                  | -0.05                  | -0.02                              | -0.04   | -0.02   | -0.08   | -0.04    | -0.08    | 1.50     | -0.03    | -0.04    | 1.50     | -0.03    | -0.11    | 1.50     |
| Ion-type                | LI     | F       | y1      | VF-28            | VF                                                   |                                 |                            | y2                          | IVF                |         |                        |                        |                                    |         |         |         |          |          | y8       |          | y9       |          |          | y10      |          |
| Delta ppm               | -27.0  | 5.2     | -0.3    | -8.3             | -4.1                                                 |                                 |                            | -21.6                       | -11.0              |         |                        |                        |                                    |         |         |         |          |          | 1.8      |          | -2.3     |          |          | -8.5     |          |

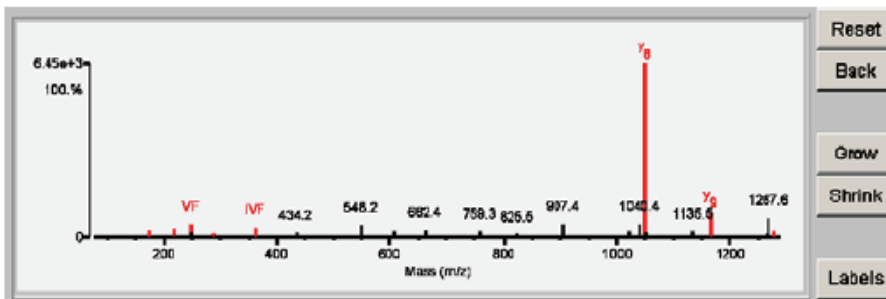

# I109

## Detailed Results

| Rank | Score | SPI (%) | BCS | # Unmatched Ions | Sequence                        | MH <sup>+</sup> Calculated (Da) | MH <sup>+</sup> Error (Da) | MH <sup>+</sup> Error (ppm) | Protein MW/pI (Da) | Species | Accession #            | MS-Digest Index #      | Protein Name                   |
|------|-------|---------|-----|------------------|---------------------------------|---------------------------------|----------------------------|-----------------------------|--------------------|---------|------------------------|------------------------|--------------------------------|
| 1    | 12.71 | 64.9    | 6   | 11/25            | (R)YQKVAHVESV/A/L/P/A/I M/R (S) | 1886.9438                       | 0.0124                     | 6.6                         | 269768.5/5.78      | HUMAN   | <a href="#">Q9Y490</a> | <a href="#">650651</a> | Talin-1 - Homo sapiens (Human) |

  

| Fragment-ion (m/z)      | 70.065 | 72.082 | 86.097 | 84.065 | 110.070 | 141.102 | 143.068 | 157.098 | 169.096 | 175.118 | 254.173 | 294.669 | 419.241 | 490.277 | 498.214 <sup>+2</sup> | 587.333 | 620.326 <sup>+2</sup> | 700.407 | 734.373 <sup>+2</sup> | 771.450 | 847.920 <sup>+2</sup>                           | 897.445 <sup>+2</sup> | 1034.475 | 1102.566 | 1207.562 |
|-------------------------|--------|--------|--------|--------|---------|---------|---------|---------|---------|---------|---------|---------|---------|---------|-----------------------|---------|-----------------------|---------|-----------------------|---------|-------------------------------------------------|-----------------------|----------|----------|----------|
| Frac. Inten. (% of TIC) | 0.01   | 0.58   | 0.44   | 7.28   | 0.13    | 2.04    | 2.00    | 1.96    | 2.70    | 3.35    | 9.19    | 2.10    | 2.44    | 3.37    | 2.06                  | 28.85   | 2.77                  | 1.93    | 2.22                  | 3.39    | 6.54                                            | 3.76                  | 5.66     | 2.87     | 2.37     |
| Rel. Inten. (% of BP)   | 0.02   | 2.02   | 1.54   | 25.24  | 0.44    | 7.06    | 6.92    | 6.78    | 9.37    | 11.60   | 31.84   | 7.29    | 8.45    | 11.68   | 7.14                  | 100.00  | 9.59                  | 6.67    | 7.71                  | 11.75   | 22.65                                           | 13.03                 | 19.64    | 9.96     | 8.22     |
| Score                   | 0.20   | 0.50   | 0.22   | -0.25  | 1.00    | 0.50    | -0.07   | -0.07   | 0.75    | 1.50    | 1.50    | -0.07   | 1.50    | 1.50    | -0.07                 | 1.50    | -0.10                 | 1.50    | -0.08                 | 1.50    | 0.25                                            | -0.13                 | -0.20    | -0.10    | -0.08    |
| Ion-type                | PR     | V      | LI     | H      | PA-28   | Y1      | Y1      | Y1      | Y1      | Y1      | Y1      | Y1      | Y1      | Y1      | Y1                    | Y1      | Y1                    | Y1      | Y1                    | Y1      | b <sub>15</sub> -H <sub>2</sub> O <sup>+2</sup> | Y7                    | Y7       | Y7       | Y7       |
| Delta ppm               | 3.9    | 12.6   | 5.5    |        | -8.8    | -10.9   |         |         | -14.5   | -8.3    | 8.4     |         | -6.9    | -6.4    |                       | -0.5    |                       | -14.9   |                       | -5.9    | 5.5                                             |                       |          |          |          |

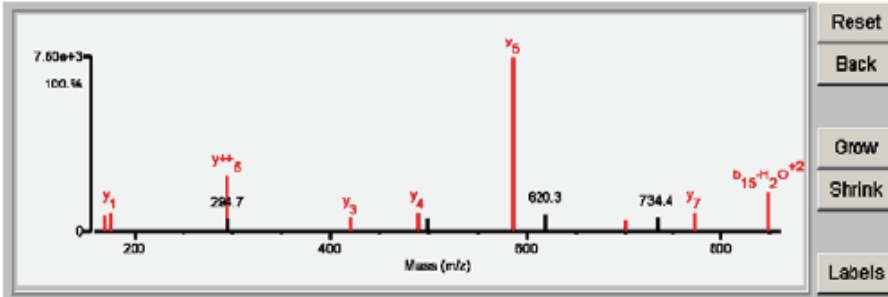

# I110

## Detailed Results

| Rank | Score | SPI (%) | BCS | # Unmatched Ions | Sequence                                          | MH <sup>+</sup> Calculated (Da) | MH <sup>+</sup> Error (Da) | MH <sup>+</sup> Error (ppm) | Protein MW/pI (Da) | Species | Accession #            | MS-Digest Index #      | Protein Name                   |
|------|-------|---------|-----|------------------|---------------------------------------------------|---------------------------------|----------------------------|-----------------------------|--------------------|---------|------------------------|------------------------|--------------------------------|
| 1    | 15.63 | 54.1    | 9   | 9/25             | (R)EQIS/QEALHTQML/T/A/VQ/EISHL/I/E/P/L/AHAAAR (A) | 3458.7407                       | 0.0187                     | 5.4                         | 269768.5/5.78      | HUMAN   | <a href="#">Q9Y490</a> | <a href="#">650651</a> | Talin-1 - Homo sapiens (Human) |

  

| Fragment-ion (m/z)      | 70.066 | 72.082 | 84.044 | 86.096 | 110.070 | 356.708 <sup>+2</sup> | 457.241 | 502.274 | 639.352 <sup>+2</sup> | 706.889 | 712.394 | 767.452 <sup>+2</sup> | 822.930 <sup>+2</sup> | 841.454 | 880.989 <sup>+2</sup> | 916.509 | 952.830 | 953.185 | 954.553 | 967.037 | 967.483 | 990.543 <sup>+3</sup> | 995.529 <sup>+3</sup> | 1053.887 <sup>+3</sup> | 1058.531 <sup>+2</sup> |
|-------------------------|--------|--------|--------|--------|---------|-----------------------|---------|---------|-----------------------|---------|---------|-----------------------|-----------------------|---------|-----------------------|---------|---------|---------|---------|---------|---------|-----------------------|-----------------------|------------------------|------------------------|
| Frac. Inten. (% of TIC) | 0.00   | 0.16   | 0.19   | 0.82   | 0.10    | 9.94                  | 3.27    | 3.41    | 3.16                  | 3.15    | 5.02    | 3.83                  | 4.19                  | 3.99    | 7.05                  | 4.38    | 3.48    | 3.48    | 3.26    | 4.05    | 5.55    | 3.88                  | 3.88                  | 16.44                  | 3.55                   |
| Rel. Inten. (% of BP)   | 0.02   | 0.98   | 1.15   | 3.79   | 0.61    | 80.46                 | 19.87   | 20.73   | 19.22                 | 19.16   | 30.55   | 23.31                 | 25.46                 | 24.29   | 42.90                 | 26.66   | 21.16   | 21.16   | 19.82   | 24.67   | 33.79   | 23.61                 | 23.51                 | 100.00                 | 21.57                  |
| Score                   | 0.20   | 0.50   | 1.00   | 0.22   | 1.00    | 1.50                  | -0.20   | 1.50    | -0.19                 | -0.19   | 1.50    | 0.60                  | 1.50                  | 1.50    | -0.21                 | 1.50    | -0.21   | 1.50    | 1.50    | 1.50    | -0.34   | -0.24                 | -0.24                 | -1.00                  | -0.22                  |
| Ion-type                | PR     | V      | E      | LI     | H       | Y7                    | Y7      | Y7      | Y7                    | Y7      | Y7      | Y7                    | Y7                    | Y7      | Y7                    | Y7      | Y7      | Y7      | Y7      | Y7      | Y7      | Y7                    | Y7                    | Y7                     | Y7                     |
| Delta ppm               | 11.1   | 18.4   | 1.3    | -1.5   | -7.9    | Y7                    | -2.4    |         |                       |         | -22.8   | 37.7                  | -10.3                 | 1.4     | 3.2                   | 4.3     |         |         | 16.9    | 8.3     |         |                       | 3.3                   |                        |                        |

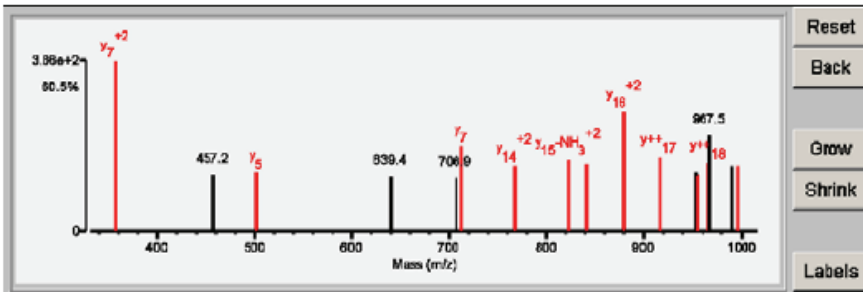



I111

Detailed Results

| Rank                                                                                                                                                                                                                                                                                                                                                                                                                                                                                                                                                                                                                                                                                                                                                                                                                                                                                                                                                                                                                                                                                                                                                                                                                                                                                                                                                                                                                                                                                                                                                                                                                                                                                                                                                                                                                                                                                                                                                                                                                                                                                                                                                                                                                                                                                                                                                                                                                                                                                                                        | Score  | SPI (%) | BCS     | # Unmatched Ions | Sequence                                        | MH <sup>+</sup> Calculated (Da) | MH <sup>+</sup> Error (Da) | MH <sup>+</sup> Error (ppm) | Protein MW/pi (Da) | Species | Accession #            | MS-Digest Index #      | Protein Name                   |                    |         |                       |         |         |         |         |          |          |          |          |          |         |         |         |         |                       |         |         |         |         |          |          |          |          |          |                         |      |      |      |      |      |      |      |      |      |      |      |      |      |      |       |      |      |      |      |      |      |      |      |      |      |                       |      |       |       |       |       |       |       |       |       |       |       |       |       |       |        |       |       |       |       |       |       |       |       |       |       |       |      |      |       |      |      |      |      |      |      |      |      |      |      |       |      |       |      |      |      |      |       |      |      |      |      |          |    |    |  |    |    |    |    |    |      |    |    |    |    |  |    |  |    |    |    |    |  |    |     |     |     |           |      |       |  |      |      |      |      |      |     |      |       |     |      |  |      |  |       |      |      |      |  |      |      |       |       |
|-----------------------------------------------------------------------------------------------------------------------------------------------------------------------------------------------------------------------------------------------------------------------------------------------------------------------------------------------------------------------------------------------------------------------------------------------------------------------------------------------------------------------------------------------------------------------------------------------------------------------------------------------------------------------------------------------------------------------------------------------------------------------------------------------------------------------------------------------------------------------------------------------------------------------------------------------------------------------------------------------------------------------------------------------------------------------------------------------------------------------------------------------------------------------------------------------------------------------------------------------------------------------------------------------------------------------------------------------------------------------------------------------------------------------------------------------------------------------------------------------------------------------------------------------------------------------------------------------------------------------------------------------------------------------------------------------------------------------------------------------------------------------------------------------------------------------------------------------------------------------------------------------------------------------------------------------------------------------------------------------------------------------------------------------------------------------------------------------------------------------------------------------------------------------------------------------------------------------------------------------------------------------------------------------------------------------------------------------------------------------------------------------------------------------------------------------------------------------------------------------------------------------------|--------|---------|---------|------------------|-------------------------------------------------|---------------------------------|----------------------------|-----------------------------|--------------------|---------|------------------------|------------------------|--------------------------------|--------------------|---------|-----------------------|---------|---------|---------|---------|----------|----------|----------|----------|----------|---------|---------|---------|---------|-----------------------|---------|---------|---------|---------|----------|----------|----------|----------|----------|-------------------------|------|------|------|------|------|------|------|------|------|------|------|------|------|------|-------|------|------|------|------|------|------|------|------|------|------|-----------------------|------|-------|-------|-------|-------|-------|-------|-------|-------|-------|-------|-------|-------|-------|--------|-------|-------|-------|-------|-------|-------|-------|-------|-------|-------|-------|------|------|-------|------|------|------|------|------|------|------|------|------|------|-------|------|-------|------|------|------|------|-------|------|------|------|------|----------|----|----|--|----|----|----|----|----|------|----|----|----|----|--|----|--|----|----|----|----|--|----|-----|-----|-----|-----------|------|-------|--|------|------|------|------|------|-----|------|-------|-----|------|--|------|--|-------|------|------|------|--|------|------|-------|-------|
| 1                                                                                                                                                                                                                                                                                                                                                                                                                                                                                                                                                                                                                                                                                                                                                                                                                                                                                                                                                                                                                                                                                                                                                                                                                                                                                                                                                                                                                                                                                                                                                                                                                                                                                                                                                                                                                                                                                                                                                                                                                                                                                                                                                                                                                                                                                                                                                                                                                                                                                                                           | 20.75  | 81.8    | 13      | 4/25             | (M) V G G I I A I Q I I I A V A Q K E M L R (K) | 1788.8190                       | -0.0073                    | -4.1                        | 289788.616.78      | HUMAN   | <a href="#">Q8Y490</a> | <a href="#">860851</a> | Talin-1 - Homo sapiens (Human) |                    |         |                       |         |         |         |         |          |          |          |          |          |         |         |         |         |                       |         |         |         |         |          |          |          |          |          |                         |      |      |      |      |      |      |      |      |      |      |      |      |      |      |       |      |      |      |      |      |      |      |      |      |      |                       |      |       |       |       |       |       |       |       |       |       |       |       |       |       |        |       |       |       |       |       |       |       |       |       |       |       |      |      |       |      |      |      |      |      |      |      |      |      |      |       |      |       |      |      |      |      |       |      |      |      |      |          |    |    |  |    |    |    |    |    |      |    |    |    |    |  |    |  |    |    |    |    |  |    |     |     |     |           |      |       |  |      |      |      |      |      |     |      |       |     |      |  |      |  |       |      |      |      |  |      |      |       |       |
| <table border="1"> <thead> <tr> <th>Fragment-Ion (m/z)</th> <th>88.096</th> <th>176.117</th> <th>278.113</th> <th>288.201</th> <th>302.118</th> <th>387.204</th> <th>415.200</th> <th>418.242</th> <th>428.272</th> <th>488.236</th> <th>548.279</th> <th>614.288</th> <th>677.329</th> <th>884.403</th> <th>727.380</th> <th>744.789<sup>+2</sup></th> <th>806.378</th> <th>840.481</th> <th>811.502</th> <th>847.458</th> <th>1019.614</th> <th>1060.645</th> <th>1173.829</th> <th>1301.871</th> <th>1372.708</th> </tr> </thead> <tbody> <tr> <td>Frag. Inten. (% of TIC)</td> <td>0.14</td> <td>3.02</td> <td>1.14</td> <td>1.36</td> <td>7.46</td> <td>2.21</td> <td>9.51</td> <td>2.11</td> <td>1.56</td> <td>6.66</td> <td>1.38</td> <td>3.99</td> <td>2.37</td> <td>2.26</td> <td>11.23</td> <td>2.32</td> <td>4.98</td> <td>4.46</td> <td>2.32</td> <td>7.78</td> <td>2.44</td> <td>9.75</td> <td>3.85</td> <td>2.55</td> <td>3.14</td> </tr> <tr> <td>Rel. Inten. (% of BP)</td> <td>1.28</td> <td>26.87</td> <td>10.13</td> <td>12.15</td> <td>66.48</td> <td>19.65</td> <td>84.75</td> <td>18.75</td> <td>13.93</td> <td>59.32</td> <td>12.34</td> <td>35.51</td> <td>21.14</td> <td>20.11</td> <td>100.00</td> <td>20.71</td> <td>44.36</td> <td>39.72</td> <td>20.63</td> <td>69.26</td> <td>21.75</td> <td>86.95</td> <td>34.27</td> <td>22.74</td> <td>27.94</td> </tr> <tr> <td>Score</td> <td>0.22</td> <td>1.50</td> <td>-0.10</td> <td>1.50</td> <td>0.50</td> <td>0.50</td> <td>0.50</td> <td>1.50</td> <td>0.75</td> <td>0.50</td> <td>1.50</td> <td>0.50</td> <td>1.50</td> <td>-0.20</td> <td>0.50</td> <td>-0.21</td> <td>1.50</td> <td>0.50</td> <td>0.50</td> <td>1.50</td> <td>-0.22</td> <td>1.50</td> <td>1.50</td> <td>1.50</td> <td>1.50</td> </tr> <tr> <td>Ion-type</td> <td>LI</td> <td>Y1</td> <td></td> <td>Y2</td> <td>b3</td> <td>a4</td> <td>b4</td> <td>Y3</td> <td>GIIA</td> <td>b5</td> <td>Y4</td> <td>b6</td> <td>Y5</td> <td></td> <td>b7</td> <td></td> <td>Y6</td> <td>b8</td> <td>b9</td> <td>Y8</td> <td></td> <td>Y9</td> <td>Y10</td> <td>Y11</td> <td>Y12</td> </tr> <tr> <td>Delta ppm</td> <td>-5.1</td> <td>-12.9</td> <td></td> <td>-8.4</td> <td>-7.9</td> <td>-9.4</td> <td>-5.2</td> <td>-3.3</td> <td>0.7</td> <td>-7.8</td> <td>-12.4</td> <td>0.1</td> <td>-8.8</td> <td></td> <td>-2.8</td> <td></td> <td>-11.4</td> <td>-5.7</td> <td>-0.7</td> <td>-5.5</td> <td></td> <td>-0.5</td> <td>-0.8</td> <td>-13.2</td> <td>-12.3</td> </tr> </tbody> </table> |        |         |         |                  |                                                 |                                 |                            |                             |                    |         |                        |                        |                                | Fragment-Ion (m/z) | 88.096  | 176.117               | 278.113 | 288.201 | 302.118 | 387.204 | 415.200  | 418.242  | 428.272  | 488.236  | 548.279  | 614.288 | 677.329 | 884.403 | 727.380 | 744.789 <sup>+2</sup> | 806.378 | 840.481 | 811.502 | 847.458 | 1019.614 | 1060.645 | 1173.829 | 1301.871 | 1372.708 | Frag. Inten. (% of TIC) | 0.14 | 3.02 | 1.14 | 1.36 | 7.46 | 2.21 | 9.51 | 2.11 | 1.56 | 6.66 | 1.38 | 3.99 | 2.37 | 2.26 | 11.23 | 2.32 | 4.98 | 4.46 | 2.32 | 7.78 | 2.44 | 9.75 | 3.85 | 2.55 | 3.14 | Rel. Inten. (% of BP) | 1.28 | 26.87 | 10.13 | 12.15 | 66.48 | 19.65 | 84.75 | 18.75 | 13.93 | 59.32 | 12.34 | 35.51 | 21.14 | 20.11 | 100.00 | 20.71 | 44.36 | 39.72 | 20.63 | 69.26 | 21.75 | 86.95 | 34.27 | 22.74 | 27.94 | Score | 0.22 | 1.50 | -0.10 | 1.50 | 0.50 | 0.50 | 0.50 | 1.50 | 0.75 | 0.50 | 1.50 | 0.50 | 1.50 | -0.20 | 0.50 | -0.21 | 1.50 | 0.50 | 0.50 | 1.50 | -0.22 | 1.50 | 1.50 | 1.50 | 1.50 | Ion-type | LI | Y1 |  | Y2 | b3 | a4 | b4 | Y3 | GIIA | b5 | Y4 | b6 | Y5 |  | b7 |  | Y6 | b8 | b9 | Y8 |  | Y9 | Y10 | Y11 | Y12 | Delta ppm | -5.1 | -12.9 |  | -8.4 | -7.9 | -9.4 | -5.2 | -3.3 | 0.7 | -7.8 | -12.4 | 0.1 | -8.8 |  | -2.8 |  | -11.4 | -5.7 | -0.7 | -5.5 |  | -0.5 | -0.8 | -13.2 | -12.3 |
| Fragment-Ion (m/z)                                                                                                                                                                                                                                                                                                                                                                                                                                                                                                                                                                                                                                                                                                                                                                                                                                                                                                                                                                                                                                                                                                                                                                                                                                                                                                                                                                                                                                                                                                                                                                                                                                                                                                                                                                                                                                                                                                                                                                                                                                                                                                                                                                                                                                                                                                                                                                                                                                                                                                          | 88.096 | 176.117 | 278.113 | 288.201          | 302.118                                         | 387.204                         | 415.200                    | 418.242                     | 428.272            | 488.236 | 548.279                | 614.288                | 677.329                        | 884.403            | 727.380 | 744.789 <sup>+2</sup> | 806.378 | 840.481 | 811.502 | 847.458 | 1019.614 | 1060.645 | 1173.829 | 1301.871 | 1372.708 |         |         |         |         |                       |         |         |         |         |          |          |          |          |          |                         |      |      |      |      |      |      |      |      |      |      |      |      |      |      |       |      |      |      |      |      |      |      |      |      |      |                       |      |       |       |       |       |       |       |       |       |       |       |       |       |       |        |       |       |       |       |       |       |       |       |       |       |       |      |      |       |      |      |      |      |      |      |      |      |      |      |       |      |       |      |      |      |      |       |      |      |      |      |          |    |    |  |    |    |    |    |    |      |    |    |    |    |  |    |  |    |    |    |    |  |    |     |     |     |           |      |       |  |      |      |      |      |      |     |      |       |     |      |  |      |  |       |      |      |      |  |      |      |       |       |
| Frag. Inten. (% of TIC)                                                                                                                                                                                                                                                                                                                                                                                                                                                                                                                                                                                                                                                                                                                                                                                                                                                                                                                                                                                                                                                                                                                                                                                                                                                                                                                                                                                                                                                                                                                                                                                                                                                                                                                                                                                                                                                                                                                                                                                                                                                                                                                                                                                                                                                                                                                                                                                                                                                                                                     | 0.14   | 3.02    | 1.14    | 1.36             | 7.46                                            | 2.21                            | 9.51                       | 2.11                        | 1.56               | 6.66    | 1.38                   | 3.99                   | 2.37                           | 2.26               | 11.23   | 2.32                  | 4.98    | 4.46    | 2.32    | 7.78    | 2.44     | 9.75     | 3.85     | 2.55     | 3.14     |         |         |         |         |                       |         |         |         |         |          |          |          |          |          |                         |      |      |      |      |      |      |      |      |      |      |      |      |      |      |       |      |      |      |      |      |      |      |      |      |      |                       |      |       |       |       |       |       |       |       |       |       |       |       |       |       |        |       |       |       |       |       |       |       |       |       |       |       |      |      |       |      |      |      |      |      |      |      |      |      |      |       |      |       |      |      |      |      |       |      |      |      |      |          |    |    |  |    |    |    |    |    |      |    |    |    |    |  |    |  |    |    |    |    |  |    |     |     |     |           |      |       |  |      |      |      |      |      |     |      |       |     |      |  |      |  |       |      |      |      |  |      |      |       |       |
| Rel. Inten. (% of BP)                                                                                                                                                                                                                                                                                                                                                                                                                                                                                                                                                                                                                                                                                                                                                                                                                                                                                                                                                                                                                                                                                                                                                                                                                                                                                                                                                                                                                                                                                                                                                                                                                                                                                                                                                                                                                                                                                                                                                                                                                                                                                                                                                                                                                                                                                                                                                                                                                                                                                                       | 1.28   | 26.87   | 10.13   | 12.15            | 66.48                                           | 19.65                           | 84.75                      | 18.75                       | 13.93              | 59.32   | 12.34                  | 35.51                  | 21.14                          | 20.11              | 100.00  | 20.71                 | 44.36   | 39.72   | 20.63   | 69.26   | 21.75    | 86.95    | 34.27    | 22.74    | 27.94    |         |         |         |         |                       |         |         |         |         |          |          |          |          |          |                         |      |      |      |      |      |      |      |      |      |      |      |      |      |      |       |      |      |      |      |      |      |      |      |      |      |                       |      |       |       |       |       |       |       |       |       |       |       |       |       |       |        |       |       |       |       |       |       |       |       |       |       |       |      |      |       |      |      |      |      |      |      |      |      |      |      |       |      |       |      |      |      |      |       |      |      |      |      |          |    |    |  |    |    |    |    |    |      |    |    |    |    |  |    |  |    |    |    |    |  |    |     |     |     |           |      |       |  |      |      |      |      |      |     |      |       |     |      |  |      |  |       |      |      |      |  |      |      |       |       |
| Score                                                                                                                                                                                                                                                                                                                                                                                                                                                                                                                                                                                                                                                                                                                                                                                                                                                                                                                                                                                                                                                                                                                                                                                                                                                                                                                                                                                                                                                                                                                                                                                                                                                                                                                                                                                                                                                                                                                                                                                                                                                                                                                                                                                                                                                                                                                                                                                                                                                                                                                       | 0.22   | 1.50    | -0.10   | 1.50             | 0.50                                            | 0.50                            | 0.50                       | 1.50                        | 0.75               | 0.50    | 1.50                   | 0.50                   | 1.50                           | -0.20              | 0.50    | -0.21                 | 1.50    | 0.50    | 0.50    | 1.50    | -0.22    | 1.50     | 1.50     | 1.50     | 1.50     |         |         |         |         |                       |         |         |         |         |          |          |          |          |          |                         |      |      |      |      |      |      |      |      |      |      |      |      |      |      |       |      |      |      |      |      |      |      |      |      |      |                       |      |       |       |       |       |       |       |       |       |       |       |       |       |       |        |       |       |       |       |       |       |       |       |       |       |       |      |      |       |      |      |      |      |      |      |      |      |      |      |       |      |       |      |      |      |      |       |      |      |      |      |          |    |    |  |    |    |    |    |    |      |    |    |    |    |  |    |  |    |    |    |    |  |    |     |     |     |           |      |       |  |      |      |      |      |      |     |      |       |     |      |  |      |  |       |      |      |      |  |      |      |       |       |
| Ion-type                                                                                                                                                                                                                                                                                                                                                                                                                                                                                                                                                                                                                                                                                                                                                                                                                                                                                                                                                                                                                                                                                                                                                                                                                                                                                                                                                                                                                                                                                                                                                                                                                                                                                                                                                                                                                                                                                                                                                                                                                                                                                                                                                                                                                                                                                                                                                                                                                                                                                                                    | LI     | Y1      |         | Y2               | b3                                              | a4                              | b4                         | Y3                          | GIIA               | b5      | Y4                     | b6                     | Y5                             |                    | b7      |                       | Y6      | b8      | b9      | Y8      |          | Y9       | Y10      | Y11      | Y12      |         |         |         |         |                       |         |         |         |         |          |          |          |          |          |                         |      |      |      |      |      |      |      |      |      |      |      |      |      |      |       |      |      |      |      |      |      |      |      |      |      |                       |      |       |       |       |       |       |       |       |       |       |       |       |       |       |        |       |       |       |       |       |       |       |       |       |       |       |      |      |       |      |      |      |      |      |      |      |      |      |      |       |      |       |      |      |      |      |       |      |      |      |      |          |    |    |  |    |    |    |    |    |      |    |    |    |    |  |    |  |    |    |    |    |  |    |     |     |     |           |      |       |  |      |      |      |      |      |     |      |       |     |      |  |      |  |       |      |      |      |  |      |      |       |       |
| Delta ppm                                                                                                                                                                                                                                                                                                                                                                                                                                                                                                                                                                                                                                                                                                                                                                                                                                                                                                                                                                                                                                                                                                                                                                                                                                                                                                                                                                                                                                                                                                                                                                                                                                                                                                                                                                                                                                                                                                                                                                                                                                                                                                                                                                                                                                                                                                                                                                                                                                                                                                                   | -5.1   | -12.9   |         | -8.4             | -7.9                                            | -9.4                            | -5.2                       | -3.3                        | 0.7                | -7.8    | -12.4                  | 0.1                    | -8.8                           |                    | -2.8    |                       | -11.4   | -5.7    | -0.7    | -5.5    |          | -0.5     | -0.8     | -13.2    | -12.3    |         |         |         |         |                       |         |         |         |         |          |          |          |          |          |                         |      |      |      |      |      |      |      |      |      |      |      |      |      |      |       |      |      |      |      |      |      |      |      |      |      |                       |      |       |       |       |       |       |       |       |       |       |       |       |       |       |        |       |       |       |       |       |       |       |       |       |       |       |      |      |       |      |      |      |      |      |      |      |      |      |      |       |      |       |      |      |      |      |       |      |      |      |      |          |    |    |  |    |    |    |    |    |      |    |    |    |    |  |    |  |    |    |    |    |  |    |     |     |     |           |      |       |  |      |      |      |      |      |     |      |       |     |      |  |      |  |       |      |      |      |  |      |      |       |       |

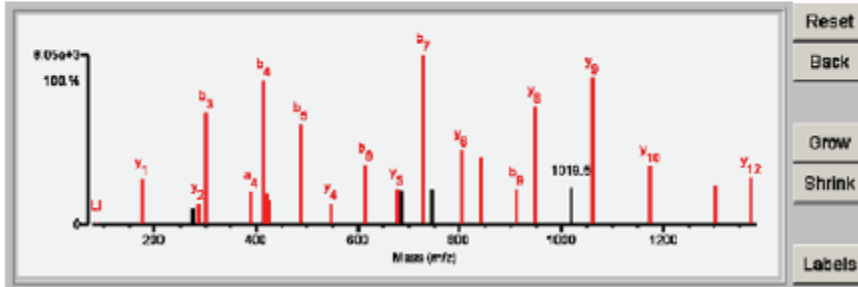

I112

Detailed Results

| Rank                                                                                                                                                                                                                                                                                                                                                                                                                                                                                                                                                                                                                                                                                                                                                                                                                                                                                                                                                                                                                                                                                                                                                                                                                                                                                                                                                                                                                                                                                                                                                                                                                                                                                                                                                                                                                                                                                                                                                                                                                                                                                                                                                                                                                                                                                                                                                                                                                                                                                                                                                                                                       | Score  | SPI (%) | BCS    | # Unmatched Ions | Sequence                                  | MH <sup>+</sup> Calculated (Da) | MH <sup>+</sup> Error (Da) | MH <sup>+</sup> Error (ppm) | Protein MW/pi (Da) | Species | Accession #            | MS-Digest Index #      | Protein Name                                             |                       |         |                       |                       |         |         |         |         |          |          |          |          |         |         |                       |         |                       |                       |         |         |         |         |          |          |          |          |                         |      |      |      |      |      |      |      |      |      |       |      |      |      |      |      |      |      |      |      |      |      |      |      |       |      |                       |      |      |      |       |       |       |       |       |       |        |       |       |       |      |       |      |       |       |       |       |       |       |       |       |       |       |      |      |      |       |      |      |       |      |      |      |      |      |      |      |      |      |      |      |      |      |      |      |      |      |      |          |    |   |    |  |    |    |  |    |    |    |    |    |    |                   |    |                    |                   |    |    |    |    |    |         |     |     |           |       |       |       |  |      |      |  |       |       |      |     |      |      |       |       |      |     |       |      |      |      |       |       |     |       |
|------------------------------------------------------------------------------------------------------------------------------------------------------------------------------------------------------------------------------------------------------------------------------------------------------------------------------------------------------------------------------------------------------------------------------------------------------------------------------------------------------------------------------------------------------------------------------------------------------------------------------------------------------------------------------------------------------------------------------------------------------------------------------------------------------------------------------------------------------------------------------------------------------------------------------------------------------------------------------------------------------------------------------------------------------------------------------------------------------------------------------------------------------------------------------------------------------------------------------------------------------------------------------------------------------------------------------------------------------------------------------------------------------------------------------------------------------------------------------------------------------------------------------------------------------------------------------------------------------------------------------------------------------------------------------------------------------------------------------------------------------------------------------------------------------------------------------------------------------------------------------------------------------------------------------------------------------------------------------------------------------------------------------------------------------------------------------------------------------------------------------------------------------------------------------------------------------------------------------------------------------------------------------------------------------------------------------------------------------------------------------------------------------------------------------------------------------------------------------------------------------------------------------------------------------------------------------------------------------------|--------|---------|--------|------------------|-------------------------------------------|---------------------------------|----------------------------|-----------------------------|--------------------|---------|------------------------|------------------------|----------------------------------------------------------|-----------------------|---------|-----------------------|-----------------------|---------|---------|---------|---------|----------|----------|----------|----------|---------|---------|-----------------------|---------|-----------------------|-----------------------|---------|---------|---------|---------|----------|----------|----------|----------|-------------------------|------|------|------|------|------|------|------|------|------|-------|------|------|------|------|------|------|------|------|------|------|------|------|------|-------|------|-----------------------|------|------|------|-------|-------|-------|-------|-------|-------|--------|-------|-------|-------|------|-------|------|-------|-------|-------|-------|-------|-------|-------|-------|-------|-------|------|------|------|-------|------|------|-------|------|------|------|------|------|------|------|------|------|------|------|------|------|------|------|------|------|------|----------|----|---|----|--|----|----|--|----|----|----|----|----|----|-------------------|----|--------------------|-------------------|----|----|----|----|----|---------|-----|-----|-----------|-------|-------|-------|--|------|------|--|-------|-------|------|-----|------|------|-------|-------|------|-----|-------|------|------|------|-------|-------|-----|-------|
| 1                                                                                                                                                                                                                                                                                                                                                                                                                                                                                                                                                                                                                                                                                                                                                                                                                                                                                                                                                                                                                                                                                                                                                                                                                                                                                                                                                                                                                                                                                                                                                                                                                                                                                                                                                                                                                                                                                                                                                                                                                                                                                                                                                                                                                                                                                                                                                                                                                                                                                                                                                                                                          | 23.54  | 83.8    | 12     | 2/25             | (E) A A M I L G Q A I R E K V V Q E R (I) | 1818.7684                       | -0.0018                    | -1.0                        | 80943.815.80       | HUMAN   | <a href="#">P17887</a> | <a href="#">838887</a> | T-complex protein 1 subunit alpha - Homo sapiens (Human) |                       |         |                       |                       |         |         |         |         |          |          |          |          |         |         |                       |         |                       |                       |         |         |         |         |          |          |          |          |                         |      |      |      |      |      |      |      |      |      |       |      |      |      |      |      |      |      |      |      |      |      |      |      |       |      |                       |      |      |      |       |       |       |       |       |       |        |       |       |       |      |       |      |       |       |       |       |       |       |       |       |       |       |      |      |      |       |      |      |       |      |      |      |      |      |      |      |      |      |      |      |      |      |      |      |      |      |      |          |    |   |    |  |    |    |  |    |    |    |    |    |    |                   |    |                    |                   |    |    |    |    |    |         |     |     |           |       |       |       |  |      |      |  |       |       |      |     |      |      |       |       |      |     |       |      |      |      |       |       |     |       |
| <table border="1"> <thead> <tr> <th>Fragment-Ion (m/z)</th> <th>70.094</th> <th>72.078</th> <th>88.096</th> <th>104.061</th> <th>176.118</th> <th>231.080</th> <th>261.086</th> <th>304.168</th> <th>334.118</th> <th>382.118</th> <th>432.220</th> <th>475.203</th> <th>631.288</th> <th>828.311<sup>+2</sup></th> <th>830.348</th> <th>886.848<sup>+2</sup></th> <th>884.851<sup>+2</sup></th> <th>731.513</th> <th>768.384</th> <th>888.438</th> <th>858.478</th> <th>1087.625</th> <th>1127.619</th> <th>1144.680</th> <th>1267.631</th> </tr> </thead> <tbody> <tr> <td>Frag. Inten. (% of TIC)</td> <td>0.00</td> <td>0.07</td> <td>0.11</td> <td>3.85</td> <td>1.71</td> <td>3.29</td> <td>2.38</td> <td>2.97</td> <td>1.94</td> <td>16.20</td> <td>7.20</td> <td>9.48</td> <td>7.31</td> <td>1.62</td> <td>2.65</td> <td>1.40</td> <td>2.21</td> <td>4.54</td> <td>2.68</td> <td>5.77</td> <td>4.79</td> <td>3.75</td> <td>1.81</td> <td>10.09</td> <td>2.19</td> </tr> <tr> <td>Rel. Inten. (% of BP)</td> <td>0.01</td> <td>0.41</td> <td>0.65</td> <td>23.83</td> <td>10.53</td> <td>20.28</td> <td>14.67</td> <td>18.30</td> <td>11.98</td> <td>100.00</td> <td>44.43</td> <td>58.49</td> <td>45.14</td> <td>9.97</td> <td>16.38</td> <td>8.62</td> <td>13.61</td> <td>28.02</td> <td>16.53</td> <td>35.62</td> <td>25.57</td> <td>23.14</td> <td>11.18</td> <td>62.24</td> <td>13.49</td> </tr> <tr> <td>Score</td> <td>0.20</td> <td>0.50</td> <td>0.22</td> <td>-0.24</td> <td>1.50</td> <td>0.50</td> <td>-0.15</td> <td>1.50</td> <td>0.50</td> <td>0.50</td> <td>1.50</td> <td>0.50</td> <td>1.50</td> <td>1.50</td> <td>1.50</td> <td>0.50</td> <td>1.50</td> <td>0.50</td> <td>1.50</td> <td>1.50</td> <td>1.50</td> <td>1.50</td> <td>1.50</td> <td>1.50</td> <td>1.50</td> </tr> <tr> <td>Ion-type</td> <td>PR</td> <td>V</td> <td>LI</td> <td></td> <td>Y1</td> <td>b2</td> <td></td> <td>Y2</td> <td>a3</td> <td>b3</td> <td>Y3</td> <td>b4</td> <td>Y4</td> <td>Y11<sup>+2</sup></td> <td>Y5</td> <td>Y12<sup>+2Q</sup></td> <td>Y12<sup>+2</sup></td> <td>b7</td> <td>Y6</td> <td>Y7</td> <td>Y8</td> <td>Y9</td> <td>Y10-NH3</td> <td>Y10</td> <td>Y11</td> </tr> <tr> <td>Delta ppm</td> <td>-14.6</td> <td>-38.5</td> <td>-14.2</td> <td></td> <td>-5.4</td> <td>-4.3</td> <td></td> <td>-17.6</td> <td>-32.5</td> <td>-7.4</td> <td>0.2</td> <td>-4.7</td> <td>-1.8</td> <td>-22.1</td> <td>-12.1</td> <td>11.3</td> <td>7.7</td> <td>-13.5</td> <td>-7.3</td> <td>-4.8</td> <td>-3.2</td> <td>-11.7</td> <td>-12.5</td> <td>1.0</td> <td>-10.1</td> </tr> </tbody> </table> |        |         |        |                  |                                           |                                 |                            |                             |                    |         |                        |                        |                                                          | Fragment-Ion (m/z)    | 70.094  | 72.078                | 88.096                | 104.061 | 176.118 | 231.080 | 261.086 | 304.168  | 334.118  | 382.118  | 432.220  | 475.203 | 631.288 | 828.311 <sup>+2</sup> | 830.348 | 886.848 <sup>+2</sup> | 884.851 <sup>+2</sup> | 731.513 | 768.384 | 888.438 | 858.478 | 1087.625 | 1127.619 | 1144.680 | 1267.631 | Frag. Inten. (% of TIC) | 0.00 | 0.07 | 0.11 | 3.85 | 1.71 | 3.29 | 2.38 | 2.97 | 1.94 | 16.20 | 7.20 | 9.48 | 7.31 | 1.62 | 2.65 | 1.40 | 2.21 | 4.54 | 2.68 | 5.77 | 4.79 | 3.75 | 1.81 | 10.09 | 2.19 | Rel. Inten. (% of BP) | 0.01 | 0.41 | 0.65 | 23.83 | 10.53 | 20.28 | 14.67 | 18.30 | 11.98 | 100.00 | 44.43 | 58.49 | 45.14 | 9.97 | 16.38 | 8.62 | 13.61 | 28.02 | 16.53 | 35.62 | 25.57 | 23.14 | 11.18 | 62.24 | 13.49 | Score | 0.20 | 0.50 | 0.22 | -0.24 | 1.50 | 0.50 | -0.15 | 1.50 | 0.50 | 0.50 | 1.50 | 0.50 | 1.50 | 1.50 | 1.50 | 0.50 | 1.50 | 0.50 | 1.50 | 1.50 | 1.50 | 1.50 | 1.50 | 1.50 | 1.50 | Ion-type | PR | V | LI |  | Y1 | b2 |  | Y2 | a3 | b3 | Y3 | b4 | Y4 | Y11 <sup>+2</sup> | Y5 | Y12 <sup>+2Q</sup> | Y12 <sup>+2</sup> | b7 | Y6 | Y7 | Y8 | Y9 | Y10-NH3 | Y10 | Y11 | Delta ppm | -14.6 | -38.5 | -14.2 |  | -5.4 | -4.3 |  | -17.6 | -32.5 | -7.4 | 0.2 | -4.7 | -1.8 | -22.1 | -12.1 | 11.3 | 7.7 | -13.5 | -7.3 | -4.8 | -3.2 | -11.7 | -12.5 | 1.0 | -10.1 |
| Fragment-Ion (m/z)                                                                                                                                                                                                                                                                                                                                                                                                                                                                                                                                                                                                                                                                                                                                                                                                                                                                                                                                                                                                                                                                                                                                                                                                                                                                                                                                                                                                                                                                                                                                                                                                                                                                                                                                                                                                                                                                                                                                                                                                                                                                                                                                                                                                                                                                                                                                                                                                                                                                                                                                                                                         | 70.094 | 72.078  | 88.096 | 104.061          | 176.118                                   | 231.080                         | 261.086                    | 304.168                     | 334.118            | 382.118 | 432.220                | 475.203                | 631.288                                                  | 828.311 <sup>+2</sup> | 830.348 | 886.848 <sup>+2</sup> | 884.851 <sup>+2</sup> | 731.513 | 768.384 | 888.438 | 858.478 | 1087.625 | 1127.619 | 1144.680 | 1267.631 |         |         |                       |         |                       |                       |         |         |         |         |          |          |          |          |                         |      |      |      |      |      |      |      |      |      |       |      |      |      |      |      |      |      |      |      |      |      |      |      |       |      |                       |      |      |      |       |       |       |       |       |       |        |       |       |       |      |       |      |       |       |       |       |       |       |       |       |       |       |      |      |      |       |      |      |       |      |      |      |      |      |      |      |      |      |      |      |      |      |      |      |      |      |      |          |    |   |    |  |    |    |  |    |    |    |    |    |    |                   |    |                    |                   |    |    |    |    |    |         |     |     |           |       |       |       |  |      |      |  |       |       |      |     |      |      |       |       |      |     |       |      |      |      |       |       |     |       |
| Frag. Inten. (% of TIC)                                                                                                                                                                                                                                                                                                                                                                                                                                                                                                                                                                                                                                                                                                                                                                                                                                                                                                                                                                                                                                                                                                                                                                                                                                                                                                                                                                                                                                                                                                                                                                                                                                                                                                                                                                                                                                                                                                                                                                                                                                                                                                                                                                                                                                                                                                                                                                                                                                                                                                                                                                                    | 0.00   | 0.07    | 0.11   | 3.85             | 1.71                                      | 3.29                            | 2.38                       | 2.97                        | 1.94               | 16.20   | 7.20                   | 9.48                   | 7.31                                                     | 1.62                  | 2.65    | 1.40                  | 2.21                  | 4.54    | 2.68    | 5.77    | 4.79    | 3.75     | 1.81     | 10.09    | 2.19     |         |         |                       |         |                       |                       |         |         |         |         |          |          |          |          |                         |      |      |      |      |      |      |      |      |      |       |      |      |      |      |      |      |      |      |      |      |      |      |      |       |      |                       |      |      |      |       |       |       |       |       |       |        |       |       |       |      |       |      |       |       |       |       |       |       |       |       |       |       |      |      |      |       |      |      |       |      |      |      |      |      |      |      |      |      |      |      |      |      |      |      |      |      |      |          |    |   |    |  |    |    |  |    |    |    |    |    |    |                   |    |                    |                   |    |    |    |    |    |         |     |     |           |       |       |       |  |      |      |  |       |       |      |     |      |      |       |       |      |     |       |      |      |      |       |       |     |       |
| Rel. Inten. (% of BP)                                                                                                                                                                                                                                                                                                                                                                                                                                                                                                                                                                                                                                                                                                                                                                                                                                                                                                                                                                                                                                                                                                                                                                                                                                                                                                                                                                                                                                                                                                                                                                                                                                                                                                                                                                                                                                                                                                                                                                                                                                                                                                                                                                                                                                                                                                                                                                                                                                                                                                                                                                                      | 0.01   | 0.41    | 0.65   | 23.83            | 10.53                                     | 20.28                           | 14.67                      | 18.30                       | 11.98              | 100.00  | 44.43                  | 58.49                  | 45.14                                                    | 9.97                  | 16.38   | 8.62                  | 13.61                 | 28.02   | 16.53   | 35.62   | 25.57   | 23.14    | 11.18    | 62.24    | 13.49    |         |         |                       |         |                       |                       |         |         |         |         |          |          |          |          |                         |      |      |      |      |      |      |      |      |      |       |      |      |      |      |      |      |      |      |      |      |      |      |      |       |      |                       |      |      |      |       |       |       |       |       |       |        |       |       |       |      |       |      |       |       |       |       |       |       |       |       |       |       |      |      |      |       |      |      |       |      |      |      |      |      |      |      |      |      |      |      |      |      |      |      |      |      |      |          |    |   |    |  |    |    |  |    |    |    |    |    |    |                   |    |                    |                   |    |    |    |    |    |         |     |     |           |       |       |       |  |      |      |  |       |       |      |     |      |      |       |       |      |     |       |      |      |      |       |       |     |       |
| Score                                                                                                                                                                                                                                                                                                                                                                                                                                                                                                                                                                                                                                                                                                                                                                                                                                                                                                                                                                                                                                                                                                                                                                                                                                                                                                                                                                                                                                                                                                                                                                                                                                                                                                                                                                                                                                                                                                                                                                                                                                                                                                                                                                                                                                                                                                                                                                                                                                                                                                                                                                                                      | 0.20   | 0.50    | 0.22   | -0.24            | 1.50                                      | 0.50                            | -0.15                      | 1.50                        | 0.50               | 0.50    | 1.50                   | 0.50                   | 1.50                                                     | 1.50                  | 1.50    | 0.50                  | 1.50                  | 0.50    | 1.50    | 1.50    | 1.50    | 1.50     | 1.50     | 1.50     | 1.50     |         |         |                       |         |                       |                       |         |         |         |         |          |          |          |          |                         |      |      |      |      |      |      |      |      |      |       |      |      |      |      |      |      |      |      |      |      |      |      |      |       |      |                       |      |      |      |       |       |       |       |       |       |        |       |       |       |      |       |      |       |       |       |       |       |       |       |       |       |       |      |      |      |       |      |      |       |      |      |      |      |      |      |      |      |      |      |      |      |      |      |      |      |      |      |          |    |   |    |  |    |    |  |    |    |    |    |    |    |                   |    |                    |                   |    |    |    |    |    |         |     |     |           |       |       |       |  |      |      |  |       |       |      |     |      |      |       |       |      |     |       |      |      |      |       |       |     |       |
| Ion-type                                                                                                                                                                                                                                                                                                                                                                                                                                                                                                                                                                                                                                                                                                                                                                                                                                                                                                                                                                                                                                                                                                                                                                                                                                                                                                                                                                                                                                                                                                                                                                                                                                                                                                                                                                                                                                                                                                                                                                                                                                                                                                                                                                                                                                                                                                                                                                                                                                                                                                                                                                                                   | PR     | V       | LI     |                  | Y1                                        | b2                              |                            | Y2                          | a3                 | b3      | Y3                     | b4                     | Y4                                                       | Y11 <sup>+2</sup>     | Y5      | Y12 <sup>+2Q</sup>    | Y12 <sup>+2</sup>     | b7      | Y6      | Y7      | Y8      | Y9       | Y10-NH3  | Y10      | Y11      |         |         |                       |         |                       |                       |         |         |         |         |          |          |          |          |                         |      |      |      |      |      |      |      |      |      |       |      |      |      |      |      |      |      |      |      |      |      |      |      |       |      |                       |      |      |      |       |       |       |       |       |       |        |       |       |       |      |       |      |       |       |       |       |       |       |       |       |       |       |      |      |      |       |      |      |       |      |      |      |      |      |      |      |      |      |      |      |      |      |      |      |      |      |      |          |    |   |    |  |    |    |  |    |    |    |    |    |    |                   |    |                    |                   |    |    |    |    |    |         |     |     |           |       |       |       |  |      |      |  |       |       |      |     |      |      |       |       |      |     |       |      |      |      |       |       |     |       |
| Delta ppm                                                                                                                                                                                                                                                                                                                                                                                                                                                                                                                                                                                                                                                                                                                                                                                                                                                                                                                                                                                                                                                                                                                                                                                                                                                                                                                                                                                                                                                                                                                                                                                                                                                                                                                                                                                                                                                                                                                                                                                                                                                                                                                                                                                                                                                                                                                                                                                                                                                                                                                                                                                                  | -14.6  | -38.5   | -14.2  |                  | -5.4                                      | -4.3                            |                            | -17.6                       | -32.5              | -7.4    | 0.2                    | -4.7                   | -1.8                                                     | -22.1                 | -12.1   | 11.3                  | 7.7                   | -13.5   | -7.3    | -4.8    | -3.2    | -11.7    | -12.5    | 1.0      | -10.1    |         |         |                       |         |                       |                       |         |         |         |         |          |          |          |          |                         |      |      |      |      |      |      |      |      |      |       |      |      |      |      |      |      |      |      |      |      |      |      |      |       |      |                       |      |      |      |       |       |       |       |       |       |        |       |       |       |      |       |      |       |       |       |       |       |       |       |       |       |       |      |      |      |       |      |      |       |      |      |      |      |      |      |      |      |      |      |      |      |      |      |      |      |      |      |          |    |   |    |  |    |    |  |    |    |    |    |    |    |                   |    |                    |                   |    |    |    |    |    |         |     |     |           |       |       |       |  |      |      |  |       |       |      |     |      |      |       |       |      |     |       |      |      |      |       |       |     |       |

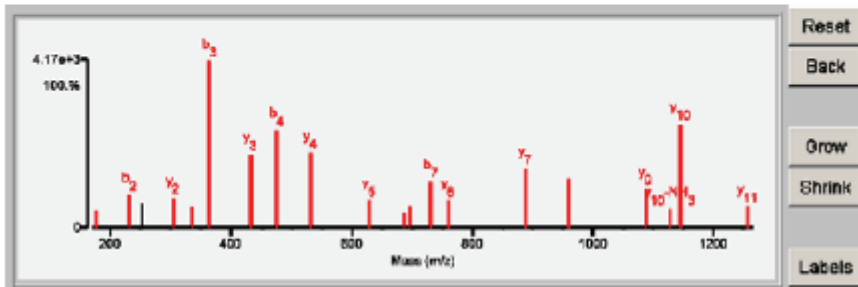

I113

Detailed Results

| Rank                                                                                                                                                                                                                                                                                                                                                                                                                                                                                                                                                                                                                                                                                                                                                                                                                                                                                                                                                                                                                                                                                                                                                                                                                                                                                                                                                                                                                                                                                                                                                                                                                                                                                                                                                                                                                                                                                                                                                                                                                                                                                                                                                                                                                                                                                                                                                                                                                                                                                                                                                                       | Score  | SP1 (%) | BC8     | # Unmatched Ions | Sequence                                | MH <sup>+</sup> Calculated (Da) | MH <sup>+</sup> Error (Da) | MH <sup>+</sup> Error (ppm) | Protein MW/pi (Da) | Species | Accession # | MS-Digest Index # | Protein Name                                             |                    |                       |                       |         |                       |         |         |         |         |         |         |          |         |         |         |                       |                       |         |                       |         |         |         |         |         |         |          |                         |      |      |      |      |      |      |      |      |      |      |      |      |      |      |      |      |      |      |      |      |      |      |      |      |      |                       |      |       |       |       |       |       |       |       |       |       |       |       |       |       |       |       |       |       |       |       |       |       |       |        |       |       |      |      |      |      |       |      |       |      |      |      |      |      |      |      |      |      |      |       |       |      |      |      |       |      |      |          |    |    |    |    |  |    |  |    |    |    |    |    |       |    |                       |                   |    |  |    |    |    |  |    |     |  |           |      |       |       |      |  |       |  |       |      |      |      |  |       |       |       |      |      |  |  |      |     |      |  |      |       |
|----------------------------------------------------------------------------------------------------------------------------------------------------------------------------------------------------------------------------------------------------------------------------------------------------------------------------------------------------------------------------------------------------------------------------------------------------------------------------------------------------------------------------------------------------------------------------------------------------------------------------------------------------------------------------------------------------------------------------------------------------------------------------------------------------------------------------------------------------------------------------------------------------------------------------------------------------------------------------------------------------------------------------------------------------------------------------------------------------------------------------------------------------------------------------------------------------------------------------------------------------------------------------------------------------------------------------------------------------------------------------------------------------------------------------------------------------------------------------------------------------------------------------------------------------------------------------------------------------------------------------------------------------------------------------------------------------------------------------------------------------------------------------------------------------------------------------------------------------------------------------------------------------------------------------------------------------------------------------------------------------------------------------------------------------------------------------------------------------------------------------------------------------------------------------------------------------------------------------------------------------------------------------------------------------------------------------------------------------------------------------------------------------------------------------------------------------------------------------------------------------------------------------------------------------------------------------|--------|---------|---------|------------------|-----------------------------------------|---------------------------------|----------------------------|-----------------------------|--------------------|---------|-------------|-------------------|----------------------------------------------------------|--------------------|-----------------------|-----------------------|---------|-----------------------|---------|---------|---------|---------|---------|---------|----------|---------|---------|---------|-----------------------|-----------------------|---------|-----------------------|---------|---------|---------|---------|---------|---------|----------|-------------------------|------|------|------|------|------|------|------|------|------|------|------|------|------|------|------|------|------|------|------|------|------|------|------|------|------|-----------------------|------|-------|-------|-------|-------|-------|-------|-------|-------|-------|-------|-------|-------|-------|-------|-------|-------|-------|-------|-------|-------|-------|-------|--------|-------|-------|------|------|------|------|-------|------|-------|------|------|------|------|------|------|------|------|------|------|-------|-------|------|------|------|-------|------|------|----------|----|----|----|----|--|----|--|----|----|----|----|----|-------|----|-----------------------|-------------------|----|--|----|----|----|--|----|-----|--|-----------|------|-------|-------|------|--|-------|--|-------|------|------|------|--|-------|-------|-------|------|------|--|--|------|-----|------|--|------|-------|
| 1                                                                                                                                                                                                                                                                                                                                                                                                                                                                                                                                                                                                                                                                                                                                                                                                                                                                                                                                                                                                                                                                                                                                                                                                                                                                                                                                                                                                                                                                                                                                                                                                                                                                                                                                                                                                                                                                                                                                                                                                                                                                                                                                                                                                                                                                                                                                                                                                                                                                                                                                                                          | 18.50  | 83.3    | 10      | 6/25             | (M) L I G Q I A I E R / V I V Q / R (I) | 1346.8418                       | 0.0001                     | 0.1                         | 80343.816.80       | HUMAN   | P17987      | 839887            | T-complex protein 1 subunit alpha - Homo sapiens (Human) |                    |                       |                       |         |                       |         |         |         |         |         |         |          |         |         |         |                       |                       |         |                       |         |         |         |         |         |         |          |                         |      |      |      |      |      |      |      |      |      |      |      |      |      |      |      |      |      |      |      |      |      |      |      |      |      |                       |      |       |       |       |       |       |       |       |       |       |       |       |       |       |       |       |       |       |       |       |       |       |       |        |       |       |      |      |      |      |       |      |       |      |      |      |      |      |      |      |      |      |      |       |       |      |      |      |       |      |      |          |    |    |    |    |  |    |  |    |    |    |    |    |       |    |                       |                   |    |  |    |    |    |  |    |     |  |           |      |       |       |      |  |       |  |       |      |      |      |  |       |       |       |      |      |  |  |      |     |      |  |      |       |
| <table border="1"> <thead> <tr> <th>Fragment-Ion (m/z)</th> <th>88.098</th> <th>174.084</th> <th>176.118</th> <th>188.088</th> <th>188.071</th> <th>202.088</th> <th>206.088</th> <th>268.108</th> <th>304.185</th> <th>387.170</th> <th>432.218</th> <th>458.205</th> <th>615.189</th> <th>631.281</th> <th>684.257<sup>+2</sup></th> <th>672.801<sup>+2</sup></th> <th>830.368</th> <th>867.291<sup>+2</sup></th> <th>702.287</th> <th>758.394</th> <th>815.388</th> <th>888.442</th> <th>828.413</th> <th>868.475</th> <th>1144.540</th> </tr> </thead> <tbody> <tr> <td>Frag. Inten. (% of TIC)</td> <td>0.09</td> <td>3.49</td> <td>1.95</td> <td>7.98</td> <td>4.57</td> <td>4.80</td> <td>3.11</td> <td>2.34</td> <td>2.31</td> <td>4.03</td> <td>5.04</td> <td>4.58</td> <td>1.90</td> <td>6.64</td> <td>2.26</td> <td>2.17</td> <td>4.25</td> <td>3.21</td> <td>3.38</td> <td>5.26</td> <td>4.68</td> <td>6.61</td> <td>2.38</td> <td>9.67</td> <td>3.30</td> </tr> <tr> <td>Rel. Inten. (% of BP)</td> <td>0.95</td> <td>36.05</td> <td>20.15</td> <td>82.51</td> <td>47.27</td> <td>49.67</td> <td>32.15</td> <td>24.20</td> <td>23.86</td> <td>41.65</td> <td>52.07</td> <td>47.31</td> <td>19.64</td> <td>69.60</td> <td>23.37</td> <td>22.42</td> <td>43.97</td> <td>33.17</td> <td>34.92</td> <td>54.43</td> <td>48.43</td> <td>68.34</td> <td>24.65</td> <td>100.00</td> <td>34.10</td> </tr> <tr> <td>Score</td> <td>0.22</td> <td>0.50</td> <td>1.50</td> <td>0.75</td> <td>-0.47</td> <td>0.50</td> <td>-0.32</td> <td>0.50</td> <td>1.50</td> <td>0.50</td> <td>1.50</td> <td>0.50</td> <td>0.75</td> <td>1.50</td> <td>0.50</td> <td>1.50</td> <td>1.50</td> <td>-0.33</td> <td>-0.35</td> <td>1.50</td> <td>0.50</td> <td>1.50</td> <td>-0.25</td> <td>1.50</td> <td>1.50</td> </tr> <tr> <td>Ion-type</td> <td>LI</td> <td>b1</td> <td>y1</td> <td>GG</td> <td></td> <td>b1</td> <td></td> <td>b2</td> <td>y2</td> <td>b3</td> <td>y3</td> <td>b4</td> <td>GGAEE</td> <td>y4</td> <td>y10-NH3<sup>+2</sup></td> <td>y10<sup>+2</sup></td> <td>y5</td> <td></td> <td>y5</td> <td>b7</td> <td>y7</td> <td></td> <td>y8</td> <td>y10</td> <td></td> </tr> <tr> <td>Delta ppm</td> <td>-4.5</td> <td>-12.7</td> <td>-16.9</td> <td>-2.8</td> <td></td> <td>-13.0</td> <td></td> <td>-14.2</td> <td>10.7</td> <td>-0.5</td> <td>-5.6</td> <td></td> <td>-21.8</td> <td>-14.8</td> <td>-22.9</td> <td>30.1</td> <td>-1.7</td> <td></td> <td></td> <td>-7.8</td> <td>6.5</td> <td>-0.0</td> <td></td> <td>-4.5</td> <td>-17.3</td> </tr> </tbody> </table> |        |         |         |                  |                                         |                                 |                            |                             |                    |         |             |                   |                                                          | Fragment-Ion (m/z) | 88.098                | 174.084               | 176.118 | 188.088               | 188.071 | 202.088 | 206.088 | 268.108 | 304.185 | 387.170 | 432.218  | 458.205 | 615.189 | 631.281 | 684.257 <sup>+2</sup> | 672.801 <sup>+2</sup> | 830.368 | 867.291 <sup>+2</sup> | 702.287 | 758.394 | 815.388 | 888.442 | 828.413 | 868.475 | 1144.540 | Frag. Inten. (% of TIC) | 0.09 | 3.49 | 1.95 | 7.98 | 4.57 | 4.80 | 3.11 | 2.34 | 2.31 | 4.03 | 5.04 | 4.58 | 1.90 | 6.64 | 2.26 | 2.17 | 4.25 | 3.21 | 3.38 | 5.26 | 4.68 | 6.61 | 2.38 | 9.67 | 3.30 | Rel. Inten. (% of BP) | 0.95 | 36.05 | 20.15 | 82.51 | 47.27 | 49.67 | 32.15 | 24.20 | 23.86 | 41.65 | 52.07 | 47.31 | 19.64 | 69.60 | 23.37 | 22.42 | 43.97 | 33.17 | 34.92 | 54.43 | 48.43 | 68.34 | 24.65 | 100.00 | 34.10 | Score | 0.22 | 0.50 | 1.50 | 0.75 | -0.47 | 0.50 | -0.32 | 0.50 | 1.50 | 0.50 | 1.50 | 0.50 | 0.75 | 1.50 | 0.50 | 1.50 | 1.50 | -0.33 | -0.35 | 1.50 | 0.50 | 1.50 | -0.25 | 1.50 | 1.50 | Ion-type | LI | b1 | y1 | GG |  | b1 |  | b2 | y2 | b3 | y3 | b4 | GGAEE | y4 | y10-NH3 <sup>+2</sup> | y10 <sup>+2</sup> | y5 |  | y5 | b7 | y7 |  | y8 | y10 |  | Delta ppm | -4.5 | -12.7 | -16.9 | -2.8 |  | -13.0 |  | -14.2 | 10.7 | -0.5 | -5.6 |  | -21.8 | -14.8 | -22.9 | 30.1 | -1.7 |  |  | -7.8 | 6.5 | -0.0 |  | -4.5 | -17.3 |
| Fragment-Ion (m/z)                                                                                                                                                                                                                                                                                                                                                                                                                                                                                                                                                                                                                                                                                                                                                                                                                                                                                                                                                                                                                                                                                                                                                                                                                                                                                                                                                                                                                                                                                                                                                                                                                                                                                                                                                                                                                                                                                                                                                                                                                                                                                                                                                                                                                                                                                                                                                                                                                                                                                                                                                         | 88.098 | 174.084 | 176.118 | 188.088          | 188.071                                 | 202.088                         | 206.088                    | 268.108                     | 304.185            | 387.170 | 432.218     | 458.205           | 615.189                                                  | 631.281            | 684.257 <sup>+2</sup> | 672.801 <sup>+2</sup> | 830.368 | 867.291 <sup>+2</sup> | 702.287 | 758.394 | 815.388 | 888.442 | 828.413 | 868.475 | 1144.540 |         |         |         |                       |                       |         |                       |         |         |         |         |         |         |          |                         |      |      |      |      |      |      |      |      |      |      |      |      |      |      |      |      |      |      |      |      |      |      |      |      |      |                       |      |       |       |       |       |       |       |       |       |       |       |       |       |       |       |       |       |       |       |       |       |       |       |        |       |       |      |      |      |      |       |      |       |      |      |      |      |      |      |      |      |      |      |       |       |      |      |      |       |      |      |          |    |    |    |    |  |    |  |    |    |    |    |    |       |    |                       |                   |    |  |    |    |    |  |    |     |  |           |      |       |       |      |  |       |  |       |      |      |      |  |       |       |       |      |      |  |  |      |     |      |  |      |       |
| Frag. Inten. (% of TIC)                                                                                                                                                                                                                                                                                                                                                                                                                                                                                                                                                                                                                                                                                                                                                                                                                                                                                                                                                                                                                                                                                                                                                                                                                                                                                                                                                                                                                                                                                                                                                                                                                                                                                                                                                                                                                                                                                                                                                                                                                                                                                                                                                                                                                                                                                                                                                                                                                                                                                                                                                    | 0.09   | 3.49    | 1.95    | 7.98             | 4.57                                    | 4.80                            | 3.11                       | 2.34                        | 2.31               | 4.03    | 5.04        | 4.58              | 1.90                                                     | 6.64               | 2.26                  | 2.17                  | 4.25    | 3.21                  | 3.38    | 5.26    | 4.68    | 6.61    | 2.38    | 9.67    | 3.30     |         |         |         |                       |                       |         |                       |         |         |         |         |         |         |          |                         |      |      |      |      |      |      |      |      |      |      |      |      |      |      |      |      |      |      |      |      |      |      |      |      |      |                       |      |       |       |       |       |       |       |       |       |       |       |       |       |       |       |       |       |       |       |       |       |       |       |        |       |       |      |      |      |      |       |      |       |      |      |      |      |      |      |      |      |      |      |       |       |      |      |      |       |      |      |          |    |    |    |    |  |    |  |    |    |    |    |    |       |    |                       |                   |    |  |    |    |    |  |    |     |  |           |      |       |       |      |  |       |  |       |      |      |      |  |       |       |       |      |      |  |  |      |     |      |  |      |       |
| Rel. Inten. (% of BP)                                                                                                                                                                                                                                                                                                                                                                                                                                                                                                                                                                                                                                                                                                                                                                                                                                                                                                                                                                                                                                                                                                                                                                                                                                                                                                                                                                                                                                                                                                                                                                                                                                                                                                                                                                                                                                                                                                                                                                                                                                                                                                                                                                                                                                                                                                                                                                                                                                                                                                                                                      | 0.95   | 36.05   | 20.15   | 82.51            | 47.27                                   | 49.67                           | 32.15                      | 24.20                       | 23.86              | 41.65   | 52.07       | 47.31             | 19.64                                                    | 69.60              | 23.37                 | 22.42                 | 43.97   | 33.17                 | 34.92   | 54.43   | 48.43   | 68.34   | 24.65   | 100.00  | 34.10    |         |         |         |                       |                       |         |                       |         |         |         |         |         |         |          |                         |      |      |      |      |      |      |      |      |      |      |      |      |      |      |      |      |      |      |      |      |      |      |      |      |      |                       |      |       |       |       |       |       |       |       |       |       |       |       |       |       |       |       |       |       |       |       |       |       |       |        |       |       |      |      |      |      |       |      |       |      |      |      |      |      |      |      |      |      |      |       |       |      |      |      |       |      |      |          |    |    |    |    |  |    |  |    |    |    |    |    |       |    |                       |                   |    |  |    |    |    |  |    |     |  |           |      |       |       |      |  |       |  |       |      |      |      |  |       |       |       |      |      |  |  |      |     |      |  |      |       |
| Score                                                                                                                                                                                                                                                                                                                                                                                                                                                                                                                                                                                                                                                                                                                                                                                                                                                                                                                                                                                                                                                                                                                                                                                                                                                                                                                                                                                                                                                                                                                                                                                                                                                                                                                                                                                                                                                                                                                                                                                                                                                                                                                                                                                                                                                                                                                                                                                                                                                                                                                                                                      | 0.22   | 0.50    | 1.50    | 0.75             | -0.47                                   | 0.50                            | -0.32                      | 0.50                        | 1.50               | 0.50    | 1.50        | 0.50              | 0.75                                                     | 1.50               | 0.50                  | 1.50                  | 1.50    | -0.33                 | -0.35   | 1.50    | 0.50    | 1.50    | -0.25   | 1.50    | 1.50     |         |         |         |                       |                       |         |                       |         |         |         |         |         |         |          |                         |      |      |      |      |      |      |      |      |      |      |      |      |      |      |      |      |      |      |      |      |      |      |      |      |      |                       |      |       |       |       |       |       |       |       |       |       |       |       |       |       |       |       |       |       |       |       |       |       |       |        |       |       |      |      |      |      |       |      |       |      |      |      |      |      |      |      |      |      |      |       |       |      |      |      |       |      |      |          |    |    |    |    |  |    |  |    |    |    |    |    |       |    |                       |                   |    |  |    |    |    |  |    |     |  |           |      |       |       |      |  |       |  |       |      |      |      |  |       |       |       |      |      |  |  |      |     |      |  |      |       |
| Ion-type                                                                                                                                                                                                                                                                                                                                                                                                                                                                                                                                                                                                                                                                                                                                                                                                                                                                                                                                                                                                                                                                                                                                                                                                                                                                                                                                                                                                                                                                                                                                                                                                                                                                                                                                                                                                                                                                                                                                                                                                                                                                                                                                                                                                                                                                                                                                                                                                                                                                                                                                                                   | LI     | b1      | y1      | GG               |                                         | b1                              |                            | b2                          | y2                 | b3      | y3          | b4                | GGAEE                                                    | y4                 | y10-NH3 <sup>+2</sup> | y10 <sup>+2</sup>     | y5      |                       | y5      | b7      | y7      |         | y8      | y10     |          |         |         |         |                       |                       |         |                       |         |         |         |         |         |         |          |                         |      |      |      |      |      |      |      |      |      |      |      |      |      |      |      |      |      |      |      |      |      |      |      |      |      |                       |      |       |       |       |       |       |       |       |       |       |       |       |       |       |       |       |       |       |       |       |       |       |       |        |       |       |      |      |      |      |       |      |       |      |      |      |      |      |      |      |      |      |      |       |       |      |      |      |       |      |      |          |    |    |    |    |  |    |  |    |    |    |    |    |       |    |                       |                   |    |  |    |    |    |  |    |     |  |           |      |       |       |      |  |       |  |       |      |      |      |  |       |       |       |      |      |  |  |      |     |      |  |      |       |
| Delta ppm                                                                                                                                                                                                                                                                                                                                                                                                                                                                                                                                                                                                                                                                                                                                                                                                                                                                                                                                                                                                                                                                                                                                                                                                                                                                                                                                                                                                                                                                                                                                                                                                                                                                                                                                                                                                                                                                                                                                                                                                                                                                                                                                                                                                                                                                                                                                                                                                                                                                                                                                                                  | -4.5   | -12.7   | -16.9   | -2.8             |                                         | -13.0                           |                            | -14.2                       | 10.7               | -0.5    | -5.6        |                   | -21.8                                                    | -14.8              | -22.9                 | 30.1                  | -1.7    |                       |         | -7.8    | 6.5     | -0.0    |         | -4.5    | -17.3    |         |         |         |                       |                       |         |                       |         |         |         |         |         |         |          |                         |      |      |      |      |      |      |      |      |      |      |      |      |      |      |      |      |      |      |      |      |      |      |      |      |      |                       |      |       |       |       |       |       |       |       |       |       |       |       |       |       |       |       |       |       |       |       |       |       |       |        |       |       |      |      |      |      |       |      |       |      |      |      |      |      |      |      |      |      |      |       |       |      |      |      |       |      |      |          |    |    |    |    |  |    |  |    |    |    |    |    |       |    |                       |                   |    |  |    |    |    |  |    |     |  |           |      |       |       |      |  |       |  |       |      |      |      |  |       |       |       |      |      |  |  |      |     |      |  |      |       |

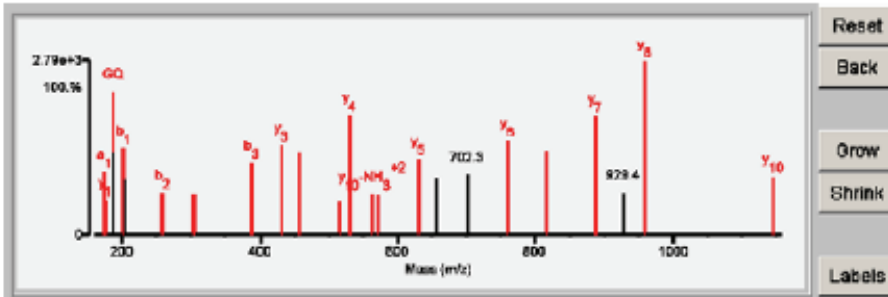

I114

Detailed Results

| Rank                                                                                                                                                                                                                                                                                                                                                                                                                                                                                                                                                                                                                                                                                                                                                                                                                                                                                                                                                                                                                                                                                                                                                                                                                                                                                                                                                                                                                                                                                                                                                                                                                                                                                                                                                                                                                                                                                                                                                                                                                                                                                                                                                                                                                                                                                                                                                                                                                                                                                                                                                                                                                              | Score  | SP1 (%) | BC8     | # Unmatched Ions | Sequence                                                                    | MH <sup>+</sup> Calculated (Da) | MH <sup>+</sup> Error (Da) | MH <sup>+</sup> Error (ppm) | Protein MW/pi (Da) | Species | Accession #           | MS-Digest Index # | Protein Name                                             |                    |         |         |                       |                       |                       |                        |                        |                   |                        |          |                       |         |         |         |         |         |                       |                       |          |                        |                        |          |                        |          |          |                         |      |      |      |      |      |      |      |      |      |      |      |      |       |      |       |      |      |      |      |      |       |      |      |      |      |                       |      |      |      |      |      |      |      |      |      |       |      |      |       |      |       |       |      |      |       |      |        |      |       |      |      |       |      |      |       |       |      |      |      |      |      |      |      |      |      |      |      |      |       |       |      |      |      |       |      |      |      |          |   |    |  |  |    |    |    |    |     |    |                  |    |    |    |    |    |  |    |                       |                   |  |                   |     |     |  |           |     |     |  |  |      |       |       |       |       |       |     |     |      |       |      |       |  |  |     |       |  |     |       |      |      |
|-----------------------------------------------------------------------------------------------------------------------------------------------------------------------------------------------------------------------------------------------------------------------------------------------------------------------------------------------------------------------------------------------------------------------------------------------------------------------------------------------------------------------------------------------------------------------------------------------------------------------------------------------------------------------------------------------------------------------------------------------------------------------------------------------------------------------------------------------------------------------------------------------------------------------------------------------------------------------------------------------------------------------------------------------------------------------------------------------------------------------------------------------------------------------------------------------------------------------------------------------------------------------------------------------------------------------------------------------------------------------------------------------------------------------------------------------------------------------------------------------------------------------------------------------------------------------------------------------------------------------------------------------------------------------------------------------------------------------------------------------------------------------------------------------------------------------------------------------------------------------------------------------------------------------------------------------------------------------------------------------------------------------------------------------------------------------------------------------------------------------------------------------------------------------------------------------------------------------------------------------------------------------------------------------------------------------------------------------------------------------------------------------------------------------------------------------------------------------------------------------------------------------------------------------------------------------------------------------------------------------------------|--------|---------|---------|------------------|-----------------------------------------------------------------------------|---------------------------------|----------------------------|-----------------------------|--------------------|---------|-----------------------|-------------------|----------------------------------------------------------|--------------------|---------|---------|-----------------------|-----------------------|-----------------------|------------------------|------------------------|-------------------|------------------------|----------|-----------------------|---------|---------|---------|---------|---------|-----------------------|-----------------------|----------|------------------------|------------------------|----------|------------------------|----------|----------|-------------------------|------|------|------|------|------|------|------|------|------|------|------|------|-------|------|-------|------|------|------|------|------|-------|------|------|------|------|-----------------------|------|------|------|------|------|------|------|------|------|-------|------|------|-------|------|-------|-------|------|------|-------|------|--------|------|-------|------|------|-------|------|------|-------|-------|------|------|------|------|------|------|------|------|------|------|------|------|-------|-------|------|------|------|-------|------|------|------|----------|---|----|--|--|----|----|----|----|-----|----|------------------|----|----|----|----|----|--|----|-----------------------|-------------------|--|-------------------|-----|-----|--|-----------|-----|-----|--|--|------|-------|-------|-------|-------|-------|-----|-----|------|-------|------|-------|--|--|-----|-------|--|-----|-------|------|------|
| 1                                                                                                                                                                                                                                                                                                                                                                                                                                                                                                                                                                                                                                                                                                                                                                                                                                                                                                                                                                                                                                                                                                                                                                                                                                                                                                                                                                                                                                                                                                                                                                                                                                                                                                                                                                                                                                                                                                                                                                                                                                                                                                                                                                                                                                                                                                                                                                                                                                                                                                                                                                                                                                 | 19.88  | 91.5    | 12      | 6/26             | (A) D A M E V I I P S T L A E S A / G L / R / P I S T / V / T E / L / R (N) | 2828.4089                       | 0.0068                     | 2.0                         | 57824.87.98        | HUMAN   | P50891                | 838723            | T-complex protein 1 subunit delta - Homo sapiens (Human) |                    |         |         |                       |                       |                       |                        |                        |                   |                        |          |                       |         |         |         |         |         |                       |                       |          |                        |                        |          |                        |          |          |                         |      |      |      |      |      |      |      |      |      |      |      |      |       |      |       |      |      |      |      |      |       |      |      |      |      |                       |      |      |      |      |      |      |      |      |      |       |      |      |       |      |       |       |      |      |       |      |        |      |       |      |      |       |      |      |       |       |      |      |      |      |      |      |      |      |      |      |      |      |       |       |      |      |      |       |      |      |      |          |   |    |  |  |    |    |    |    |     |    |                  |    |    |    |    |    |  |    |                       |                   |  |                   |     |     |  |           |     |     |  |  |      |       |       |       |       |       |     |     |      |       |      |       |  |  |     |       |  |     |       |      |      |
| <table border="1"> <thead> <tr> <th>Fragment-Ion (m/z)</th> <th>72.081</th> <th>88.087</th> <th>104.054</th> <th>120.081</th> <th>176.118</th> <th>281.088</th> <th>275.086</th> <th>288.189</th> <th>332.124</th> <th>408.102</th> <th>608.294<sup>+2</sup></th> <th>618.280</th> <th>635.150</th> <th>817.349</th> <th>834.221</th> <th>747.288</th> <th>748.316<sup>+2</sup></th> <th>837.074<sup>+3</sup></th> <th>1015.588</th> <th>1033.518<sup>+2</sup></th> <th>1042.067<sup>+2</sup></th> <th>1068.628</th> <th>1088.586<sup>+2</sup></th> <th>1128.819</th> <th>1289.717</th> </tr> </thead> <tbody> <tr> <td>Frag. Inten. (% of TIC)</td> <td>0.05</td> <td>0.09</td> <td>2.13</td> <td>1.54</td> <td>2.25</td> <td>1.53</td> <td>2.03</td> <td>1.50</td> <td>1.30</td> <td>3.65</td> <td>1.29</td> <td>2.13</td> <td>12.60</td> <td>1.21</td> <td>13.64</td> <td>3.03</td> <td>1.15</td> <td>1.91</td> <td>4.62</td> <td>2.39</td> <td>25.66</td> <td>1.78</td> <td>8.82</td> <td>2.21</td> <td>1.49</td> </tr> <tr> <td>Rel. Inten. (% of BP)</td> <td>0.18</td> <td>0.37</td> <td>8.31</td> <td>6.02</td> <td>8.75</td> <td>5.96</td> <td>7.89</td> <td>5.83</td> <td>5.06</td> <td>14.24</td> <td>5.01</td> <td>8.31</td> <td>49.13</td> <td>4.71</td> <td>53.15</td> <td>11.82</td> <td>4.47</td> <td>7.46</td> <td>18.02</td> <td>9.33</td> <td>100.00</td> <td>6.92</td> <td>34.36</td> <td>8.61</td> <td>5.82</td> </tr> <tr> <td>Score</td> <td>0.50</td> <td>0.22</td> <td>-0.08</td> <td>-0.06</td> <td>1.50</td> <td>0.75</td> <td>0.50</td> <td>1.50</td> <td>0.75</td> <td>0.50</td> <td>1.50</td> <td>1.50</td> <td>0.50</td> <td>1.50</td> <td>0.50</td> <td>0.50</td> <td>-0.04</td> <td>-0.07</td> <td>1.50</td> <td>0.50</td> <td>1.50</td> <td>-0.07</td> <td>1.50</td> <td>1.50</td> <td>1.50</td> </tr> <tr> <td>Ion-type</td> <td>V</td> <td>LI</td> <td></td> <td></td> <td>y1</td> <td>ME</td> <td>b2</td> <td>y2</td> <td>AME</td> <td>b3</td> <td>y9<sup>+2</sup></td> <td>y4</td> <td>b4</td> <td>y5</td> <td>b5</td> <td>b6</td> <td></td> <td>y9</td> <td>y10-NH3<sup>+2</sup></td> <td>y10<sup>+2</sup></td> <td></td> <td>y11<sup>+2</sup></td> <td>y10</td> <td>y12</td> <td></td> </tr> <tr> <td>Delta ppm</td> <td>5.9</td> <td>4.3</td> <td></td> <td></td> <td>-6.0</td> <td>-12.1</td> <td>-20.4</td> <td>-14.6</td> <td>-15.0</td> <td>-23.1</td> <td>2.1</td> <td>0.0</td> <td>-6.2</td> <td>-21.2</td> <td>-1.1</td> <td>-18.2</td> <td></td> <td></td> <td>5.0</td> <td>-22.6</td> <td></td> <td>2.1</td> <td>-10.3</td> <td>-2.1</td> <td>-7.1</td> </tr> </tbody> </table> |        |         |         |                  |                                                                             |                                 |                            |                             |                    |         |                       |                   |                                                          | Fragment-Ion (m/z) | 72.081  | 88.087  | 104.054               | 120.081               | 176.118               | 281.088                | 275.086                | 288.189           | 332.124                | 408.102  | 608.294 <sup>+2</sup> | 618.280 | 635.150 | 817.349 | 834.221 | 747.288 | 748.316 <sup>+2</sup> | 837.074 <sup>+3</sup> | 1015.588 | 1033.518 <sup>+2</sup> | 1042.067 <sup>+2</sup> | 1068.628 | 1088.586 <sup>+2</sup> | 1128.819 | 1289.717 | Frag. Inten. (% of TIC) | 0.05 | 0.09 | 2.13 | 1.54 | 2.25 | 1.53 | 2.03 | 1.50 | 1.30 | 3.65 | 1.29 | 2.13 | 12.60 | 1.21 | 13.64 | 3.03 | 1.15 | 1.91 | 4.62 | 2.39 | 25.66 | 1.78 | 8.82 | 2.21 | 1.49 | Rel. Inten. (% of BP) | 0.18 | 0.37 | 8.31 | 6.02 | 8.75 | 5.96 | 7.89 | 5.83 | 5.06 | 14.24 | 5.01 | 8.31 | 49.13 | 4.71 | 53.15 | 11.82 | 4.47 | 7.46 | 18.02 | 9.33 | 100.00 | 6.92 | 34.36 | 8.61 | 5.82 | Score | 0.50 | 0.22 | -0.08 | -0.06 | 1.50 | 0.75 | 0.50 | 1.50 | 0.75 | 0.50 | 1.50 | 1.50 | 0.50 | 1.50 | 0.50 | 0.50 | -0.04 | -0.07 | 1.50 | 0.50 | 1.50 | -0.07 | 1.50 | 1.50 | 1.50 | Ion-type | V | LI |  |  | y1 | ME | b2 | y2 | AME | b3 | y9 <sup>+2</sup> | y4 | b4 | y5 | b5 | b6 |  | y9 | y10-NH3 <sup>+2</sup> | y10 <sup>+2</sup> |  | y11 <sup>+2</sup> | y10 | y12 |  | Delta ppm | 5.9 | 4.3 |  |  | -6.0 | -12.1 | -20.4 | -14.6 | -15.0 | -23.1 | 2.1 | 0.0 | -6.2 | -21.2 | -1.1 | -18.2 |  |  | 5.0 | -22.6 |  | 2.1 | -10.3 | -2.1 | -7.1 |
| Fragment-Ion (m/z)                                                                                                                                                                                                                                                                                                                                                                                                                                                                                                                                                                                                                                                                                                                                                                                                                                                                                                                                                                                                                                                                                                                                                                                                                                                                                                                                                                                                                                                                                                                                                                                                                                                                                                                                                                                                                                                                                                                                                                                                                                                                                                                                                                                                                                                                                                                                                                                                                                                                                                                                                                                                                | 72.081 | 88.087  | 104.054 | 120.081          | 176.118                                                                     | 281.088                         | 275.086                    | 288.189                     | 332.124            | 408.102 | 608.294 <sup>+2</sup> | 618.280           | 635.150                                                  | 817.349            | 834.221 | 747.288 | 748.316 <sup>+2</sup> | 837.074 <sup>+3</sup> | 1015.588              | 1033.518 <sup>+2</sup> | 1042.067 <sup>+2</sup> | 1068.628          | 1088.586 <sup>+2</sup> | 1128.819 | 1289.717              |         |         |         |         |         |                       |                       |          |                        |                        |          |                        |          |          |                         |      |      |      |      |      |      |      |      |      |      |      |      |       |      |       |      |      |      |      |      |       |      |      |      |      |                       |      |      |      |      |      |      |      |      |      |       |      |      |       |      |       |       |      |      |       |      |        |      |       |      |      |       |      |      |       |       |      |      |      |      |      |      |      |      |      |      |      |      |       |       |      |      |      |       |      |      |      |          |   |    |  |  |    |    |    |    |     |    |                  |    |    |    |    |    |  |    |                       |                   |  |                   |     |     |  |           |     |     |  |  |      |       |       |       |       |       |     |     |      |       |      |       |  |  |     |       |  |     |       |      |      |
| Frag. Inten. (% of TIC)                                                                                                                                                                                                                                                                                                                                                                                                                                                                                                                                                                                                                                                                                                                                                                                                                                                                                                                                                                                                                                                                                                                                                                                                                                                                                                                                                                                                                                                                                                                                                                                                                                                                                                                                                                                                                                                                                                                                                                                                                                                                                                                                                                                                                                                                                                                                                                                                                                                                                                                                                                                                           | 0.05   | 0.09    | 2.13    | 1.54             | 2.25                                                                        | 1.53                            | 2.03                       | 1.50                        | 1.30               | 3.65    | 1.29                  | 2.13              | 12.60                                                    | 1.21               | 13.64   | 3.03    | 1.15                  | 1.91                  | 4.62                  | 2.39                   | 25.66                  | 1.78              | 8.82                   | 2.21     | 1.49                  |         |         |         |         |         |                       |                       |          |                        |                        |          |                        |          |          |                         |      |      |      |      |      |      |      |      |      |      |      |      |       |      |       |      |      |      |      |      |       |      |      |      |      |                       |      |      |      |      |      |      |      |      |      |       |      |      |       |      |       |       |      |      |       |      |        |      |       |      |      |       |      |      |       |       |      |      |      |      |      |      |      |      |      |      |      |      |       |       |      |      |      |       |      |      |      |          |   |    |  |  |    |    |    |    |     |    |                  |    |    |    |    |    |  |    |                       |                   |  |                   |     |     |  |           |     |     |  |  |      |       |       |       |       |       |     |     |      |       |      |       |  |  |     |       |  |     |       |      |      |
| Rel. Inten. (% of BP)                                                                                                                                                                                                                                                                                                                                                                                                                                                                                                                                                                                                                                                                                                                                                                                                                                                                                                                                                                                                                                                                                                                                                                                                                                                                                                                                                                                                                                                                                                                                                                                                                                                                                                                                                                                                                                                                                                                                                                                                                                                                                                                                                                                                                                                                                                                                                                                                                                                                                                                                                                                                             | 0.18   | 0.37    | 8.31    | 6.02             | 8.75                                                                        | 5.96                            | 7.89                       | 5.83                        | 5.06               | 14.24   | 5.01                  | 8.31              | 49.13                                                    | 4.71               | 53.15   | 11.82   | 4.47                  | 7.46                  | 18.02                 | 9.33                   | 100.00                 | 6.92              | 34.36                  | 8.61     | 5.82                  |         |         |         |         |         |                       |                       |          |                        |                        |          |                        |          |          |                         |      |      |      |      |      |      |      |      |      |      |      |      |       |      |       |      |      |      |      |      |       |      |      |      |      |                       |      |      |      |      |      |      |      |      |      |       |      |      |       |      |       |       |      |      |       |      |        |      |       |      |      |       |      |      |       |       |      |      |      |      |      |      |      |      |      |      |      |      |       |       |      |      |      |       |      |      |      |          |   |    |  |  |    |    |    |    |     |    |                  |    |    |    |    |    |  |    |                       |                   |  |                   |     |     |  |           |     |     |  |  |      |       |       |       |       |       |     |     |      |       |      |       |  |  |     |       |  |     |       |      |      |
| Score                                                                                                                                                                                                                                                                                                                                                                                                                                                                                                                                                                                                                                                                                                                                                                                                                                                                                                                                                                                                                                                                                                                                                                                                                                                                                                                                                                                                                                                                                                                                                                                                                                                                                                                                                                                                                                                                                                                                                                                                                                                                                                                                                                                                                                                                                                                                                                                                                                                                                                                                                                                                                             | 0.50   | 0.22    | -0.08   | -0.06            | 1.50                                                                        | 0.75                            | 0.50                       | 1.50                        | 0.75               | 0.50    | 1.50                  | 1.50              | 0.50                                                     | 1.50               | 0.50    | 0.50    | -0.04                 | -0.07                 | 1.50                  | 0.50                   | 1.50                   | -0.07             | 1.50                   | 1.50     | 1.50                  |         |         |         |         |         |                       |                       |          |                        |                        |          |                        |          |          |                         |      |      |      |      |      |      |      |      |      |      |      |      |       |      |       |      |      |      |      |      |       |      |      |      |      |                       |      |      |      |      |      |      |      |      |      |       |      |      |       |      |       |       |      |      |       |      |        |      |       |      |      |       |      |      |       |       |      |      |      |      |      |      |      |      |      |      |      |      |       |       |      |      |      |       |      |      |      |          |   |    |  |  |    |    |    |    |     |    |                  |    |    |    |    |    |  |    |                       |                   |  |                   |     |     |  |           |     |     |  |  |      |       |       |       |       |       |     |     |      |       |      |       |  |  |     |       |  |     |       |      |      |
| Ion-type                                                                                                                                                                                                                                                                                                                                                                                                                                                                                                                                                                                                                                                                                                                                                                                                                                                                                                                                                                                                                                                                                                                                                                                                                                                                                                                                                                                                                                                                                                                                                                                                                                                                                                                                                                                                                                                                                                                                                                                                                                                                                                                                                                                                                                                                                                                                                                                                                                                                                                                                                                                                                          | V      | LI      |         |                  | y1                                                                          | ME                              | b2                         | y2                          | AME                | b3      | y9 <sup>+2</sup>      | y4                | b4                                                       | y5                 | b5      | b6      |                       | y9                    | y10-NH3 <sup>+2</sup> | y10 <sup>+2</sup>      |                        | y11 <sup>+2</sup> | y10                    | y12      |                       |         |         |         |         |         |                       |                       |          |                        |                        |          |                        |          |          |                         |      |      |      |      |      |      |      |      |      |      |      |      |       |      |       |      |      |      |      |      |       |      |      |      |      |                       |      |      |      |      |      |      |      |      |      |       |      |      |       |      |       |       |      |      |       |      |        |      |       |      |      |       |      |      |       |       |      |      |      |      |      |      |      |      |      |      |      |      |       |       |      |      |      |       |      |      |      |          |   |    |  |  |    |    |    |    |     |    |                  |    |    |    |    |    |  |    |                       |                   |  |                   |     |     |  |           |     |     |  |  |      |       |       |       |       |       |     |     |      |       |      |       |  |  |     |       |  |     |       |      |      |
| Delta ppm                                                                                                                                                                                                                                                                                                                                                                                                                                                                                                                                                                                                                                                                                                                                                                                                                                                                                                                                                                                                                                                                                                                                                                                                                                                                                                                                                                                                                                                                                                                                                                                                                                                                                                                                                                                                                                                                                                                                                                                                                                                                                                                                                                                                                                                                                                                                                                                                                                                                                                                                                                                                                         | 5.9    | 4.3     |         |                  | -6.0                                                                        | -12.1                           | -20.4                      | -14.6                       | -15.0              | -23.1   | 2.1                   | 0.0               | -6.2                                                     | -21.2              | -1.1    | -18.2   |                       |                       | 5.0                   | -22.6                  |                        | 2.1               | -10.3                  | -2.1     | -7.1                  |         |         |         |         |         |                       |                       |          |                        |                        |          |                        |          |          |                         |      |      |      |      |      |      |      |      |      |      |      |      |       |      |       |      |      |      |      |      |       |      |      |      |      |                       |      |      |      |      |      |      |      |      |      |       |      |      |       |      |       |       |      |      |       |      |        |      |       |      |      |       |      |      |       |       |      |      |      |      |      |      |      |      |      |      |      |      |       |       |      |      |      |       |      |      |      |          |   |    |  |  |    |    |    |    |     |    |                  |    |    |    |    |    |  |    |                       |                   |  |                   |     |     |  |           |     |     |  |  |      |       |       |       |       |       |     |     |      |       |      |       |  |  |     |       |  |     |       |      |      |

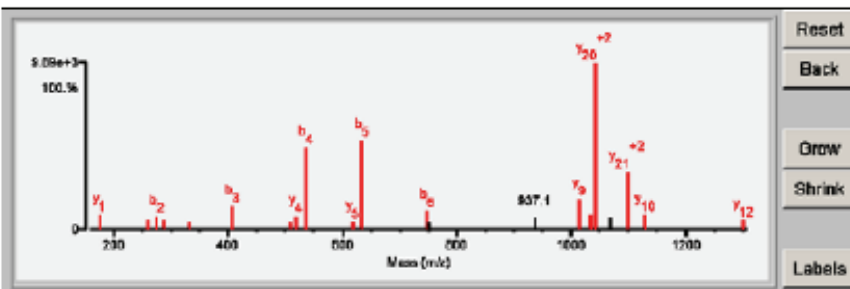

# I115

## Detailed Results

| Rank | Score | SP1 (%) | BCS | # Unmatched Ions | Sequence                                   | MH <sup>+</sup> Calculated (Da) | MH <sup>+</sup> Error (Da) | MH <sup>+</sup> Error (ppm) | Protein MW (Da) | Species | Accession # | MS-Digest Index # | Protein Name                                               |
|------|-------|---------|-----|------------------|--------------------------------------------|---------------------------------|----------------------------|-----------------------------|-----------------|---------|-------------|-------------------|------------------------------------------------------------|
| 1    | 13.40 | 74.8    | 8   | 10/24            | (A)G A L L L E E A E / Q / L / L / D R (G) | 1644.7625                       | -0.0002                    | -0.1                        | 59871.41646     | HUMAN   | P48843      | 838751            | T-complex protein 1 subunit epsilon - Homo sapiens (Human) |

  

| Fragment-Ion (m/z)      | 88.098 | 87.087 | 120.078 | 175.110 | 280.143 | 302.169 | 330.148 | 371.205 | 403.228 | 418.178 | 443.227 | 463.174*2 | 518.311 | 672.542 | 826.308 | 844.382 | 844.443 | 883.106 | 888.467 | 898.471 | 873.478 | 1084.568 | 1102.525 | 1216.803 |
|-------------------------|--------|--------|---------|---------|---------|---------|---------|---------|---------|---------|---------|-----------|---------|---------|---------|---------|---------|---------|---------|---------|---------|----------|----------|----------|
| Frac. Inten. (% of TIC) | 0.38   | 2.26   | 2.90    | 2.20    | 6.51    | 5.88    | 13.86   | 3.97    | 3.25    | 2.47    | 11.05   | 2.32      | 3.45    | 2.26    | 2.73    | 2.39    | 4.59    | 2.79    | 2.57    | 2.69    | 7.84    | 2.60     | 6.04     | 2.98     |
| Rel. Inten. (% of BP)   | 2.72   | 16.30  | 20.94   | 15.91   | 47.00   | 42.42   | 100.00  | 28.67   | 23.44   | 17.81   | 79.74   | 16.71     | 24.88   | 16.28   | 19.70   | 17.27   | 33.10   | 20.15   | 18.55   | 19.41   | 56.59   | 18.78    | 43.57    | 21.47    |
| Score                   | 0.22   | -0.16  | -0.21   | -0.16   | 1.50    | 0.50    | 0.50    | 0.75    | 1.50    | -0.18   | 0.75    | -0.17     | 1.50    | -0.16   | -0.20   | 1.50    | 1.50    | -0.20   | -0.19   | -0.19   | 1.50    | 0.50     | 1.50     | 1.50     |
| Ion-type                | L1     |        |         |         | Y2      | #3      | b3      | EQL     | Y3      |         | b4      |           | Y4      |         | Y5      | Y7      |         |         |         |         | Y8      | Y9+H2O   | Y8       | Y10      |
| Delta ppm               | 13.6   |        |         |         | -11.4   | -5.9    | -3.3    | 31.2    | -5.6    |         | -14.8   |           | -5.9    |         |         | 14.6    | -10.9   |         |         |         | -17.5   | 26.4     | -11.0    | -15.5    |

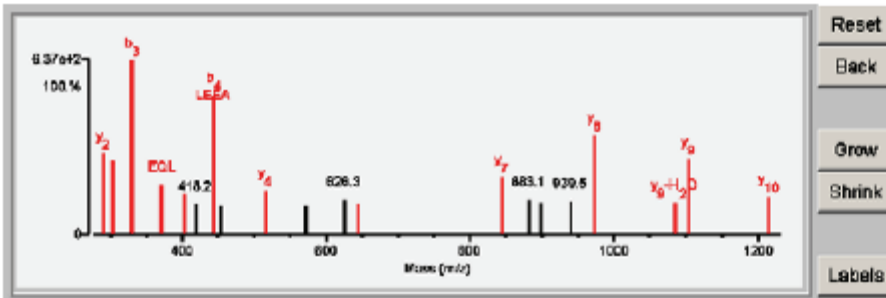

# I116

## Detailed Results

| Rank | Score | SP1 (%) | BCS | # Unmatched Ions | Sequence                                                                                                                               | MH <sup>+</sup> Calculated (Da) | MH <sup>+</sup> Error (Da) | MH <sup>+</sup> Error (ppm) | Protein MW (Da) | Species | Accession # | MS-Digest Index # | Protein Name                                          |
|------|-------|---------|-----|------------------|----------------------------------------------------------------------------------------------------------------------------------------|---------------------------------|----------------------------|-----------------------------|-----------------|---------|-------------|-------------------|-------------------------------------------------------|
| 1    | 15.11 | 65.6    | 10  | 12/25            | (R)G L D P S L P S L F L P H L G P Q G P A L T F E Q E N I L H T T Q T D C Y N H L / A / C / L / Q / M / L / P / V / Y / Y / E / R (V) | 5860.7965                       | 0.0312                     | 5.3                         | 20012.779.02    | HUMAN   | Q8NSM4      | 689669            | Tetrapeptide repeat protein 9C - Homo sapiens (Human) |

  

| Fragment-Ion (m/z)      | 175.117 | 467.218 | 565.286 | 581.255 | 583.300 | 606.308 | 718.316 | 759.361 | 767.391 | 777.392 | 906.440 | 977.519 | 1037.474 | 1146.562 | 1165.543 | 1278.622 | 1359.755 | 1370.714*2 | 1406.785 | 1409.321 | 1410.056*4 | 1459.475 | 1494.709 | 1636.812 | 1652.810*8 |
|-------------------------|---------|---------|---------|---------|---------|---------|---------|---------|---------|---------|---------|---------|----------|----------|----------|----------|----------|------------|----------|----------|------------|----------|----------|----------|------------|
| Frac. Inten. (% of TIC) | 3.58    | 2.89    | 2.15    | 3.10    | 6.13    | 2.07    | 1.95    | 1.87    | 1.88    | 18.15   | 9.56    | 4.01    | 7.02     | 2.16     | 6.41     | 3.42     | 1.60     | 2.53       | 4.23     | 1.82     | 3.77       | 1.72     | 2.89     | 2.71     | 2.35       |
| Rel. Inten. (% of BP)   | 19.73   | 15.92   | 11.84   | 17.05   | 33.78   | 11.41   | 10.73   | 10.33   | 10.34   | 100.00  | 52.67   | 22.06   | 38.69    | 11.92    | 35.33    | 18.84    | 8.81     | 13.95      | 23.33    | 10.05    | 20.75      | 9.49     | 15.95    | 14.94    | 12.95      |
| Score                   | 1.50    | 1.50    | -0.12   | 1.50    | -0.34   | 0.75    | 0.75    | 0.50    | -0.10   | 1.50    | 1.50    | -0.22   | 1.50     | -0.12    | 1.50     | 1.50     | -0.09    | -0.14      | -0.23    | -0.10    | -0.21      | -0.09    | 1.50     | 1.50     | -0.13      |
| Ion-type                | y1      |         | y3      |         | y4      | PSPLPN  | CLLQME  | y5-H2O  |         | y6      | y7      |         | y8       |          | y9       |          | y10      |            |          |          |            |          | y12      | y14      |            |
| Delta ppm               | -10.0   | -14.3   |         | -21.9   |         | -29.0   | -15.6   | -23.1   |         | 3.6     | 9.2     |         | 1.7      |          | 10.6     | 5.6      |          |            |          |          |            | 0.4      | 18.0     |          |            |

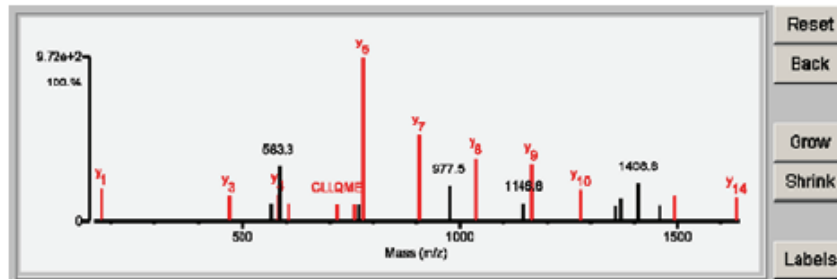

I117

Detailed Results

| Rank | Score | SP1 (%) | BCS | # Unmatched Ions | Sequence                                            | MH <sup>+</sup> Calculated (Da) | MH <sup>+</sup> Error (Da) | MH <sup>+</sup> Error (ppm) | Protein MW/pI (Da) | Species | Accession # | M8-Digest Index # | Protein Name                                                    |
|------|-------|---------|-----|------------------|-----------------------------------------------------|---------------------------------|----------------------------|-----------------------------|--------------------|---------|-------------|-------------------|-----------------------------------------------------------------|
| 1    | 12.50 | 73.4    | 8   | 11/26            | (S) I A D V Q / P / G G T / L D I T / I / I / R (A) | 1688.8411                       | -0.0101                    | -8.3                        | 88560.216.52       | HUMAN   | Q13283      | 847887            | Transcription intermediary factor 1-beta - Homo sapiens (Human) |

  

| Fragment-Ion (m/z)      | 70.065 | 86.086 | 133.058 | 174.082 | 176.117 | 202.088 | 244.088 | 246.098 | 288.201 | 317.118 | 334.140 | 401.280 | 588.333 | 678.340 <sup>+2</sup> | 882.368 <sup>+2</sup> | 881.318 <sup>+2</sup> | 707.706 | 708.098 | 708.384 | 730.433 <sup>+2</sup> | 752.338 | 843.630 | 1058.810 | 1137.950             | 1155.986 |
|-------------------------|--------|--------|---------|---------|---------|---------|---------|---------|---------|---------|---------|---------|---------|-----------------------|-----------------------|-----------------------|---------|---------|---------|-----------------------|---------|---------|----------|----------------------|----------|
| Frac. Inten. (% of TIC) | 0.00   | 0.21   | 4.02    | 3.33    | 2.52    | 4.03    | 10.31   | 1.55    | 1.50    | 4.55    | 3.30    | 1.45    | 2.01    | 22.75                 | 2.30                  | 1.75                  | 2.82    | 2.65    | 2.06    | 2.01                  | 2.25    | 1.51    | 2.45     | 1.45                 | 16.74    |
| Rel. Inten. (% of BP)   | 0.01   | 0.91   | 17.85   | 14.64   | 12.83   | 17.71   | 45.30   | 6.97    | 7.01    | 20.13   | 14.48   | 6.38    | 8.84    | 100.00                | 10.12                 | 7.70                  | 11.52   | 11.65   | 9.05    | 8.84                  | 9.91    | 7.07    | 10.78    | 6.35                 | 73.54    |
| Score                   | 0.20   | 0.22   | -0.18   | 0.50    | 1.50    | 0.50    | 0.75    | -0.07   | 1.50    | 0.50    | -0.14   | 1.50    | -0.09   | -0.09                 | -0.10                 | -0.08                 | -0.12   | -0.12   | -0.09   | -0.09                 | -0.10   | 1.50    | 1.50     | 0.50                 | 1.50     |
| Ion-type                | FR     | LI     |         | a1      | y1      | b1      | DG      |         | y2      | b2      |         | y3      |         | y11 <sup>+2</sup>     |                       |                       |         |         |         |                       |         | y7      | y10      | y11+H <sub>2</sub> O | y11      |
| Delta ppm               | -0.4   | -20.0  |         | -22.5   | -13.4   | -15.9   | -4.1    |         | -7.3    | 0.1     |         | -18.1   |         | -0.5                  |                       |                       |         |         |         |                       |         | 0.1     | -10.0    | -10.8                | -7.5     |

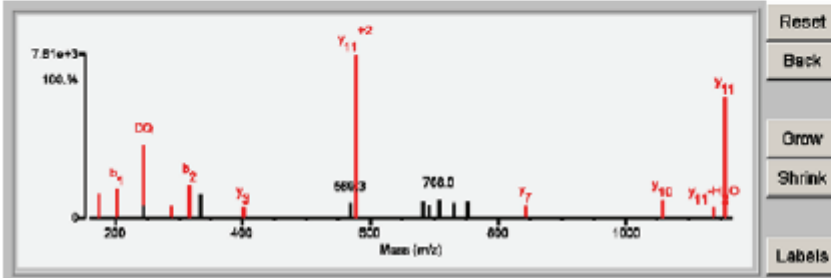

I118

Detailed Results

| Rank | Score | SP1 (%) | BCS | # Unmatched Ions | Sequence                              | MH <sup>+</sup> Calculated (Da) | MH <sup>+</sup> Error (Da) | MH <sup>+</sup> Error (ppm) | Protein MW/pI (Da) | Species | Accession # | M8-Digest Index # | Protein Name                                                     |
|------|-------|---------|-----|------------------|---------------------------------------|---------------------------------|----------------------------|-----------------------------|--------------------|---------|-------------|-------------------|------------------------------------------------------------------|
| 1    | 13.57 | 78.7    | 7   | 8/26             | (F) G V S / S / R / A / N / Y / R (E) | 948.4044                        | 0.0070                     | 7.3                         | 89322.316.14       | HUMAN   | P56072      | 841186            | Transitional endoplasmic reticulum ATPase - Homo sapiens (Human) |

  

| Fragment-Ion (m/z)      | 102.064 | 146.030 | 147.036 | 176.117 | 188.071             | 217.084 | 261.073 | 274.188 | 275.077 | 300.108 | 318.082 | 328.079 | 334.114 | 344.098             | 380.086 | 388.220 | 402.173 | 435.407 | 442.250 <sup>+2</sup> | 468.298 | 488.297 | 588.313 | 667.357             | 675.338 | 738.380             |
|-------------------------|---------|---------|---------|---------|---------------------|---------|---------|---------|---------|---------|---------|---------|---------|---------------------|---------|---------|---------|---------|-----------------------|---------|---------|---------|---------------------|---------|---------------------|
| Frac. Inten. (% of TIC) | 0.26    | 8.83    | 1.98    | 3.31    | 2.29                | 1.79    | 3.81    | 1.84    | 5.06    | 1.84    | 2.45    | 3.19    | 1.83    | 2.20                | 2.74    | 2.98    | 1.76    | 2.15    | 3.10                  | 19.71   | 2.02    | 8.28    | 2.03                | 12.14   | 2.41                |
| Rel. Inten. (% of BP)   | 1.31    | 44.81   | 10.04   | 16.81   | 11.59               | 9.10    | 19.34   | 9.31    | 25.67   | 9.31    | 12.44   | 16.20   | 9.31    | 11.17               | 13.91   | 15.10   | 8.94    | 10.92   | 15.71                 | 100.00  | 10.27   | 42.00   | 10.28               | 61.61   | 12.21               |
| Score                   | 1.00    | 0.50    | -0.10   | 1.50    | 0.50                | 0.75    | -0.19   | 1.50    | 0.50    | -0.09   | -0.12   | -0.16   | 0.50    | 0.25                | -0.14   | 1.50    | 0.75    | -0.11   | -0.16                 | 1.50    | -0.10   | 1.50    | 1.50                | 1.50    | 0.50                |
| Ion-type                | E       | b1      |         | y1      | SE-H <sub>2</sub> O | SE      |         | y2      | b2      |         |         |         | a3      | b3-H <sub>2</sub> O | y3      | SEAN    |         |         |                       | y4      |         | y5      | y5-H <sub>2</sub> O | y6      | y7-H <sub>2</sub> O |
| Delta ppm               | -11.3   | 12.2    |         | -13.4   | -6.7                | 3.7     |         | -6.1    | 23.6    |         |         |         | 17.3    | 10.8                |         | -26.3   | 25.3    |         |                       | -2.6    |         | 5.3     | 38.7                | -6.6    | 8.2                 |

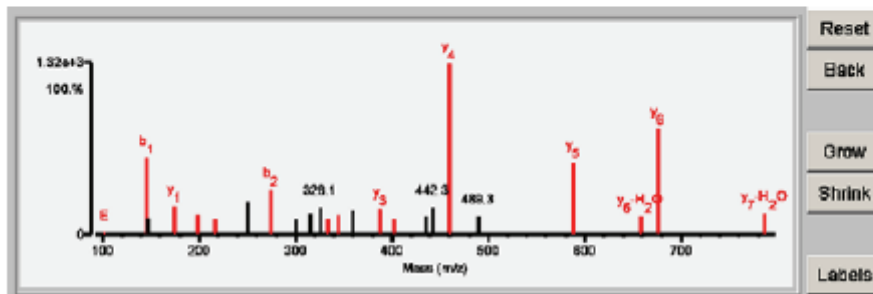

I119

Detailed Results

| Rank | Score | SPI (%) | BCS | # Unmatched Ions | Sequence                                                       | MH <sup>+</sup> Calculated (Da) | MH <sup>+</sup> Error (Da) | MH <sup>+</sup> Error (ppm) | Protein MWpl (Da) | Species | Accession # | MS-Digest Index # | Protein Name                         |
|------|-------|---------|-----|------------------|----------------------------------------------------------------|---------------------------------|----------------------------|-----------------------------|-------------------|---------|-------------|-------------------|--------------------------------------|
| 1    | 11.62 | 70.9    | 9   | 10/25            | (G)I G E V A I V I S S A I V V G E P G I T V T H L A V N R (V) | 2464.2864                       | 0.0122                     | 5.0                         | 67878.0758        | HUMAN   | P29401      | 650355            | Transketolase - Homo sapiens (Human) |

  

| Fragment-ion (m/z)      | 72.080 | 86.096 | 109.026 | 155.076 | 187.070 | 259.110        | 388.154        | 459.192        | 558.260        | 639.382           | 639.869 | 646.807 <sup>+2</sup> | 732.415 <sup>+2</sup>         | 768.381 | 774.363 | 781.938           | 787.371 | 801.408 | 803.348        | 831.483           | 831.982 | 867.482 | 954.045 <sup>+2</sup>         | 1003.535 <sup>+2</sup>        | 1277.731        |
|-------------------------|--------|--------|---------|---------|---------|----------------|----------------|----------------|----------------|-------------------|---------|-----------------------|-------------------------------|---------|---------|-------------------|---------|---------|----------------|-------------------|---------|---------|-------------------------------|-------------------------------|-----------------|
| Frac. Inten. (% of TIC) | 0.10   | 0.16   | 4.39    | 2.33    | 6.48    | 2.80           | 5.09           | 10.22          | 6.19           | 5.05              | 4.22    | 2.73                  | 5.69                          | 2.51    | 2.43    | 5.07              | 3.70    | 2.14    | 4.01           | 3.97              | 2.52    | 2.15    | 9.32                          | 2.52                          | 4.53            |
| Rel. Inten. (% of BP)   | 0.95   | 1.57   | 42.95   | 22.81   | 63.38   | 25.45          | 49.81          | 100.00         | 60.54          | 49.40             | 41.29   | 26.74                 | 54.71                         | 24.54   | 23.79   | 49.62             | 36.22   | 20.93   | 39.22          | 38.87             | 24.67   | 21.04   | 91.24                         | 24.62                         | 44.35           |
| Score                   | 0.50   | 0.22   | -0.43   | -0.23   | 0.75    | 0.50           | 0.50           | 0.50           | 0.50           | 1.50              | -0.41   | -0.27                 | 1.50                          | -0.25   | -0.24   | 1.50              | -0.36   | -0.21   | 0.50           | 1.50              | -0.25   | -0.21   | 1.50                          | 1.50                          | 1.50            |
| Ion-type                | V      | LI     | LI      |         | GE      | b <sub>2</sub> | b <sub>3</sub> | b <sub>4</sub> | b <sub>5</sub> | y <sup>++12</sup> |         |                       | y <sub>14</sub> <sup>+2</sup> |         |         | y <sup>++15</sup> |         |         | b <sub>8</sub> | y <sup>++16</sup> |         |         | y <sub>19</sub> <sup>+2</sup> | b <sub>20</sub> <sup>+2</sup> | y <sub>12</sub> |
| Delta ppm               | -14.9  | -6.1   |         |         | -10.9   | -10.4          | -2.8           |                | -0.0           | 19.0              |         |                       | 18.3                          |         |         | 2.4               |         |         | -16.4          | 15.1              |         |         | 25.1                          | 17.5                          | -1.0            |

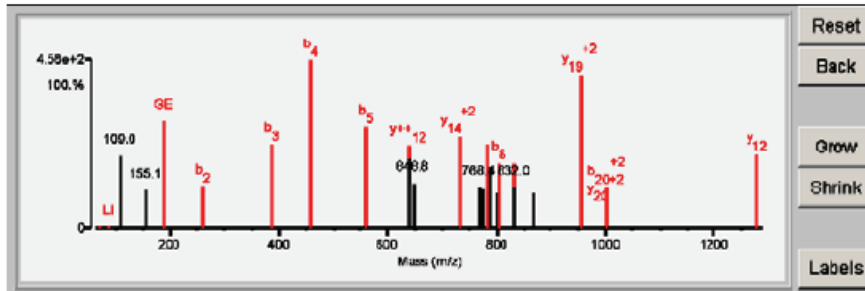

I120

Detailed Results

| Rank | Score | SPI (%) | BCS | # Unmatched Ions | Sequence                                  | MH <sup>+</sup> Calculated (Da) | MH <sup>+</sup> Error (Da) | MH <sup>+</sup> Error (ppm) | Protein MWpl (Da) | Species | Accession # | MS-Digest Index # | Protein Name                    |
|------|-------|---------|-----|------------------|-------------------------------------------|---------------------------------|----------------------------|-----------------------------|-------------------|---------|-------------|-------------------|---------------------------------|
| 1    | 16.51 | 85.6    | 9   | 5/25             | (R) P I L I I S T F I N R L D S G F R (L) | 1933.9477                       | 0.0152                     | 7.9                         | 26183.1/6.02      | HUMAN   | Q15631      | 669189            | Translin - Homo sapiens (Human) |

  

| Fragment-ion (m/z)      | 70.066 | 72.081 | 84.044 | 86.096 | 87.054 | 102.055 | 110.069 | 120.080 | 175.117        | 216.117 | 340.143 | 379.209        | 428.729 <sup>+2</sup>        | 466.243        | 563.259                          | 581.273        | 620.804 <sup>+2</sup>         | 631.355 | 654.863 <sup>+2</sup> | 694.346        | 737.356        | 823.396        | 884.444        | 937.433        | 997.514        |
|-------------------------|--------|--------|--------|--------|--------|---------|---------|---------|----------------|---------|---------|----------------|------------------------------|----------------|----------------------------------|----------------|-------------------------------|---------|-----------------------|----------------|----------------|----------------|----------------|----------------|----------------|
| Frac. Inten. (% of TIC) | 0.00   | 2.88   | 0.11   | 1.05   | 0.08   | 0.10    | 0.12    | 0.36    | 3.57           | 2.53    | 2.83    | 3.09           | 4.17                         | 12.42          | 2.57                             | 19.37          | 2.99                          | 3.11    | 3.07                  | 8.76           | 2.84           | 4.36           | 8.09           | 7.98           | 3.76           |
| Rel. Inten. (% of BP)   | 0.03   | 14.74  | 0.58   | 5.42   | 0.40   | 0.52    | 0.59    | 1.88    | 18.43          | 13.07   | 14.58   | 15.97          | 21.54                        | 64.13          | 13.27                            | 100.00         | 15.43                         | 16.06   | 15.84                 | 45.21          | 13.82          | 22.50          | 41.76          | 41.18          | 19.42          |
| Score                   | 0.20   | -0.15  | 1.00   | 0.22   | 0.33   | 1.00    | 1.00    | 1.00    | 1.50           | -0.13   | -0.15   | 1.50           | 0.50                         | 1.50           | 0.50                             | 1.50           | 0.50                          | -0.16   | -0.16                 | 1.50           | 0.50           | 1.50           | 0.50           | 1.50           | 0.50           |
| Ion-type                | PR     |        | E      | LI     | NR     | E       | H       | F       | y <sub>1</sub> |         |         | y <sub>3</sub> | a <sub>7</sub> <sup>+2</sup> | y <sub>4</sub> | y <sub>5</sub> -H <sub>2</sub> O | y <sub>5</sub> | b <sub>10</sub> <sup>+2</sup> |         |                       | y <sub>6</sub> | b <sub>6</sub> | y <sub>7</sub> | b <sub>7</sub> | y <sub>8</sub> | b <sub>8</sub> |
| Delta ppm               | 16.8   |        | -9.4   | -2.6   | -12.5  |         | -17.0   | -5.6    | -14.0          |         |         | 1.5            | 11.7                         | 4.0            | 3.5                              | 8.4            | -2.8                          |         |                       | -9.2           | -13.9          | 2.4            | 11.0           | -5.2           | -4.6           |

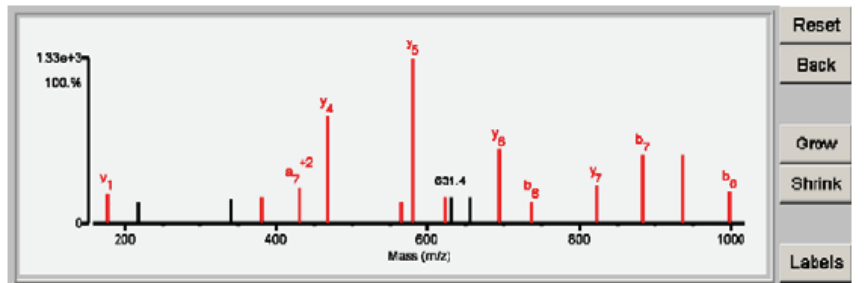

# I121

## Detailed Results

| Rank | Score | SPI (%) | BCS | # Unmatched Ions | Sequence                                | MH <sup>+</sup> Calculated (Da) | MH <sup>+</sup> Error (Da) | MH <sup>+</sup> Error (ppm) | Protein MW pI (Da) | Species | Accession #            | MS-Digest Index #      | Protein Name                                               |
|------|-------|---------|-----|------------------|-----------------------------------------|---------------------------------|----------------------------|-----------------------------|--------------------|---------|------------------------|------------------------|------------------------------------------------------------|
| 1    | 21.74 | 86.8    | 10  | 2/26             | (R) R I A I P I V D I Y L T Q I G R (S) | 1386.7083                       | -0.0018                    | -1.3                        | 28210.1/10.48      | HUMAN   | <a href="#">Q8BVC6</a> | <a href="#">860971</a> | Transmembrane protein 109 precursor - Homo sapiens (Human) |

  

| Fragment-ion (m/z)      | 70.066 | 72.081 | 84.044 | 86.095 | 102.054 | 110.070        | 127.031        | 136.074        | 175.116 | 198.068        | 199.069 | 226.063        | 309.125 | 323.077        | 339.146                       | 369.262        | 373.156                       | 396.169        | 495.235        | 505.135        | 571.357        | 672.400        | 771.469        | 828.489         | 941.570 |
|-------------------------|--------|--------|--------|--------|---------|----------------|----------------|----------------|---------|----------------|---------|----------------|---------|----------------|-------------------------------|----------------|-------------------------------|----------------|----------------|----------------|----------------|----------------|----------------|-----------------|---------|
| Frac. Inten. (% of TIC) | 0.00   | 0.07   | 0.12   | 2.84   | 1.90    | 3.37           | 4.19           | 2.44           | 2.09    | 5.63           | 2.68    | 3.04           | 3.32    | 2.47           | 2.69                          | 24.11          | 4.70                          | 1.97           | 12.01          | 2.24           | 3.42           | 2.37           | 6.92           | 1.88            | 3.53    |
| Rel. Inten. (% of BP)   | 0.02   | 0.29   | 0.49   | 11.79  | 7.87    | 13.98          | 17.39          | 10.12          | 8.66    | 23.36          | 11.12   | 12.62          | 13.78   | 10.24          | 11.17                         | 100.00         | 19.49                         | 8.19           | 49.80          | 9.28           | 14.18          | 9.84           | 28.71          | 7.79            | 14.62   |
| Score                   | 0.20   | 0.50   | 0.22   | 0.50   | 0.75    | 0.50           | 1.50           | -0.10          | 0.50    | 0.75           | 1.50    | 0.75           | 0.50    | 0.75           | 1.50                          | 1.50           | 1.50                          | -0.08          | 1.50           | 0.50           | 1.50           | 1.50           | 1.50           | 1.50            | 1.50    |
| Ion-type                | PR     | V      | LI     | PV-28  | PV      | b <sub>1</sub> | y <sub>2</sub> | b <sub>2</sub> | PVD     | b <sub>3</sub> | APVD    | b <sub>3</sub> | PVDV    | y <sub>4</sub> | y <sub>10</sub> <sup>+2</sup> | y <sub>5</sub> | y <sub>11</sub> <sup>+2</sup> | b <sub>5</sub> | b <sub>5</sub> | b <sub>5</sub> | y <sub>7</sub> | y <sub>8</sub> | y <sub>9</sub> | y <sub>10</sub> |         |
| Delta ppm               | -1.8   | -5.2   | 9.0    | -35.7  | -6.9    | -9.0           | -16.4          | -4.7           | -5.4    | -1.1           | 5.7     | 3.0            | -3.4    | -3.3           | 2.2                           | -1.3           | 4.3                           | 1.9            | -0.4           | -3.5           | -10.6          | 4.9            | -8.0           |                 |         |

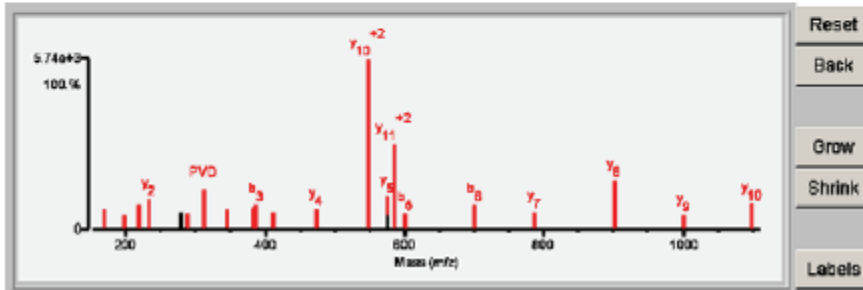

# I122

## Detailed Results

| Rank | Score | SPI (%) | BCS | # Unmatched Ions | Sequence                          | MH <sup>+</sup> Calculated (Da) | MH <sup>+</sup> Error (Da) | MH <sup>+</sup> Error (ppm) | Protein MW pI (Da) | Species | Accession #            | MS-Digest Index #      | Protein Name                                             |
|------|-------|---------|-----|------------------|-----------------------------------|---------------------------------|----------------------------|-----------------------------|--------------------|---------|------------------------|------------------------|----------------------------------------------------------|
| 1    | 12.55 | 80.2    | 6   | 10/25            | (L) B I L I G I V I P S V I R (K) | 1166.6350                       | -0.0037                    | -3.2                        | 61248.2/6.01       | HUMAN   | <a href="#">O14773</a> | <a href="#">656809</a> | Tripeptidyl-peptidase 1 precursor - Homo sapiens (Human) |

  

| Fragment-ion (m/z)      | 70.066 | 72.081 | 84.044 | 86.095 | 102.054 | 110.070        | 127.031        | 136.074        | 175.116        | 198.068        | 199.069        | 226.063        | 309.125        | 323.077        | 339.146        | 369.262        | 373.156        | 396.169        | 495.235        | 505.135        | 571.357        | 672.400        | 771.469        | 828.489        | 941.570 |
|-------------------------|--------|--------|--------|--------|---------|----------------|----------------|----------------|----------------|----------------|----------------|----------------|----------------|----------------|----------------|----------------|----------------|----------------|----------------|----------------|----------------|----------------|----------------|----------------|---------|
| Frac. Inten. (% of TIC) | 0.00   | 0.09   | 1.56   | 0.16   | 2.06    | 0.09           | 4.82           | 1.70           | 2.58           | 9.60           | 1.66           | 22.68          | 1.94           | 1.41           | 4.88           | 1.41           | 1.53           | 5.94           | 1.93           | 1.73           | 3.13           | 4.98           | 1.99           | 12.47          | 9.72    |
| Rel. Inten. (% of BP)   | 0.02   | 0.41   | 6.82   | 0.64   | 9.06    | 0.40           | 21.23          | 7.48           | 11.38          | 42.31          | 7.30           | 100.00         | 8.57           | 6.21           | 21.41          | 6.20           | 6.73           | 26.19          | 8.53           | 7.65           | 13.79          | 21.95          | 8.79           | 56.00          | 42.83   |
| Score                   | 0.20   | 0.50   | -0.07  | 0.22   | -0.09   | 1.00           | -0.21          | -0.07          | 1.50           | 0.50           | -0.07          | 0.50           | -0.09          | -0.08          | 0.50           | -0.06          | -0.07          | 0.50           | 0.50           | -0.08          | 1.50           | 1.50           | 1.50           | 1.50           | 1.50    |
| Ion-type                | PR     | V      | LI     | LI     | H       | y <sub>1</sub> | a <sub>1</sub> | b <sub>1</sub> | a <sub>1</sub> | b <sub>1</sub> | b <sub>1</sub> | b <sub>1</sub> | b <sub>1</sub> | b <sub>1</sub> | b <sub>2</sub> | b <sub>2</sub> | b <sub>3</sub> | b <sub>3</sub> | b <sub>4</sub> | y <sub>5</sub> | y <sub>6</sub> | y <sub>7</sub> | y <sub>8</sub> | y <sub>9</sub> |         |
| Delta ppm               | 18.2   | 7.3    | -17.7  | -9.8   | -15.7   | -14.4          | -11.8          | -10.4          | -4.3           | -0.1           | -5.2           | -4.3           | -5.8           | -8.2           |                |                |                |                |                |                |                |                |                |                |         |

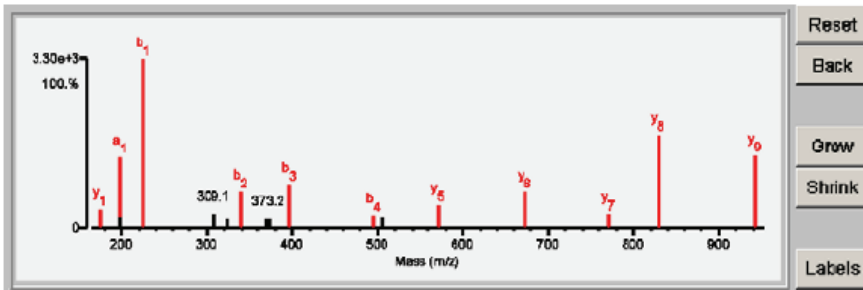

# I123

## Detailed Results

| Rank | Score | SPI (%) | BCS | # Unmatched Ions | Sequence                             | MH <sup>+</sup> Calculated (Da) | MH <sup>+</sup> Error (Da) | MH <sup>+</sup> Error (ppm) | Protein MW pI (Da) | Species | Accession #            | MS-Digest Index #      | Protein Name                                  |
|------|-------|---------|-----|------------------|--------------------------------------|---------------------------------|----------------------------|-----------------------------|--------------------|---------|------------------------|------------------------|-----------------------------------------------|
| 1    | 13.96 | 63.7    | 6   | 7/24             | (R)A V F V D L E F T/V/I/D/E/V/R (T) | 1789.9041                       | 0.0105                     | 5.9                         | 50135.9/4.94       | HUMAN   | <a href="#">Q71U36</a> | <a href="#">637677</a> | Tubulin alpha-1A chain - Homo sapiens (Human) |
| 1    | 13.96 | 63.7    | 6   | 7/24             | (R)A V F V D L E F T/V/I/D/E/V/R (T) | 1789.9041                       | 0.0105                     | 5.9                         | 50151.9/4.94       | HUMAN   | <a href="#">P68363</a> | <a href="#">637689</a> | Tubulin alpha-1B chain - Homo sapiens (Human) |
| 1    | 13.96 | 63.7    | 6   | 7/24             | (R)A V F V D L E F T/V/I/D/E/V/R (T) | 1789.9041                       | 0.0105                     | 5.9                         | 49895.6/4.96       | HUMAN   | <a href="#">Q9BQE3</a> | <a href="#">637707</a> | Tubulin alpha-1C chain - Homo sapiens (Human) |

  

| Fragment-ion (m/z)      | 70.065 | 72.082 | 86.096 | 102.055 | 120.081 | 143.118 | 171.107 | 175.115 | 181.098 | 201.125 | 229.118 | 247.143 | 274.187 | 318.183 | 358.164 | 362.168 | 403.224 | 508.758 <sup>+2</sup> | 518.258 | 604.292 | 631.338 | 730.407 | 774.411 | 1016.505 |
|-------------------------|--------|--------|--------|---------|---------|---------|---------|---------|---------|---------|---------|---------|---------|---------|---------|---------|---------|-----------------------|---------|---------|---------|---------|---------|----------|
| Frac. Inten. (% of TIC) | 0.01   | 0.55   | 0.34   | 0.07    | 0.36    | 10.83   | 3.81    | 4.86    | 2.11    | 2.89    | 3.27    | 2.16    | 7.01    | 2.88    | 2.58    | 6.86    | 3.85    | 7.03                  | 9.27    | 2.05    | 14.76   | 3.21    | 2.54    | 7.15     |
| Rel. Inten. (% of BP)   | 0.05   | 3.70   | 2.30   | 0.48    | 2.41    | 73.38   | 26.80   | 31.58   | 14.28   | 18.23   | 22.14   | 14.62   | 47.60   | 19.35   | 17.45   | 46.48   | 26.07   | 47.66                 | 62.80   | 13.92   | 100.00  | 21.78   | 17.18   | 48.44    |
| Score                   | 0.20   | 0.50   | 0.22   | 1.00    | 1.00    | -0.73   | -0.26   | 1.50    | -0.14   | 0.75    | 0.75    | 1.60    | 1.00    | -0.19   | 0.75    | 0.75    | 1.50    | -0.48                 | 1.50    | 0.75    | 1.50    | 1.50    | -0.17   | -0.48    |
| Ion-type                | PR     | V      | LI     | E       | F       |         |         | y1      | TV      | EV      | FV      |         |         | IDE     | FVD     |         | y4      | FVDLE                 | y5      | y6      |         |         |         |          |
| Delta ppm               | 2.5    | 10.0   | -2.6   | 3.4     | -1.5    |         |         | -22.0   | 5.1     | EV-28   | -6.5    | -10.9   | -2.1    | 6.5     | -11.2   | -15.5   | 2.3     | -10.6                 | -4.5    | -3.3    |         |         |         |          |

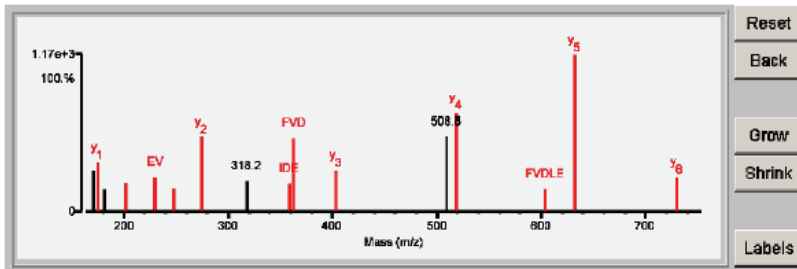

# I124

## Detailed Results

| Rank | Score | SPI (%) | BCS | # Unmatched Ions | Sequence                             | MH <sup>+</sup> Calculated (Da) | MH <sup>+</sup> Error (Da) | MH <sup>+</sup> Error (ppm) | Protein MW pI (Da) | Species | Accession #            | MS-Digest Index #      | Protein Name                                  |
|------|-------|---------|-----|------------------|--------------------------------------|---------------------------------|----------------------------|-----------------------------|--------------------|---------|------------------------|------------------------|-----------------------------------------------|
| 1    | 17.87 | 82.2    | 8   | 5/26             | (A)V F V D L E I P T V I D E V/R (T) | 1718.8870                       | -0.0084                    | -3.7                        | 50136.8/4.94       | HUMAN   | <a href="#">Q71U36</a> | <a href="#">637677</a> | Tubulin alpha-1A chain - Homo sapiens (Human) |
| 1    | 17.87 | 82.2    | 8   | 5/26             | (A)V F V D L E I P T V I D E V/R (T) | 1718.8870                       | -0.0084                    | -3.7                        | 50161.8/4.94       | HUMAN   | <a href="#">P68363</a> | <a href="#">637689</a> | Tubulin alpha-1B chain - Homo sapiens (Human) |
| 1    | 17.87 | 82.2    | 8   | 5/26             | (A)V F V D L E I P T V I D E V/R (T) | 1718.8870                       | -0.0084                    | -3.7                        | 49896.8/4.98       | HUMAN   | <a href="#">Q9BQE3</a> | <a href="#">637707</a> | Tubulin alpha-1C chain - Homo sapiens (Human) |

  

| Fragment-ion (m/z)      | 72.080 | 86.097 | 102.081 | 176.124 | 182.089 | 200.101 | 274.191 | 336.141 | 382.171 | 494.212 | 467.213 | 488.262 | 476.248 | 648.284               | 677.306 <sup>+2</sup> | 804.288 | 831.331 | 882.319 | 784.811 | 791.367 | 928.506 | 1067.648 | 1170.843 | 1285.987 | 1308.581 |
|-------------------------|--------|--------|---------|---------|---------|---------|---------|---------|---------|---------|---------|---------|---------|-----------------------|-----------------------|---------|---------|---------|---------|---------|---------|----------|----------|----------|----------|
| Frac. Inten. (% of TIC) | 0.05   | 0.13   | 0.17    | 1.39    | 1.56    | 2.08    | 1.34    | 12.57   | 9.15    | 6.74    | 1.31    | 1.42    | 1.51    | 10.38                 | 1.22                  | 2.18    | 1.44    | 3.32    | 1.50    | 2.37    | 22.16   | 8.05     | 2.13     | 4.58     | 1.22     |
| Rel. Inten. (% of BP)   | 0.24   | 0.59   | 0.77    | 6.28    | 7.05    | 9.37    | 6.07    | 56.70   | 41.29   | 30.42   | 5.89    | 6.40    | 6.94    | 46.84                 | 5.49                  | 9.85    | 6.48    | 15.00   | 6.75    | 10.70   | 100.00  | 36.50    | 9.61     | 20.65    | 5.49     |
| Score                   | 0.50   | 0.22   | 1.00    | 1.50    | -0.07   | -0.09   | 0.50    | 0.50    | 0.75    | 0.50    | 0.75    | -0.06   | 0.75    | 0.50                  | 0.50                  | 0.75    | 1.50    | 0.50    | 0.50    | 0.50    | 1.50    | 1.50     | 1.50     | 1.50     | -0.05    |
| Ion-type                | V      | LI     | F       | y1      |         | y2      | b2      | FVD     | b3      | IDEV    |         | FVDLE   | b4      | y10-NH3 <sup>+2</sup> | FVDLE                 | y5      | b5      |         | b6      | y6      | y6      | y6       | y10      | y11      |          |
| Delta ppm               | -12.1  | 3.2    | 4.4     | 30.0    |         | 14.3    | -6.2    | -2.3    | -0.2    | -37.5   |         | -21.9   | -9.5    | -6.4                  | -21.0                 | -15.8   | -5.4    |         | -11.0   | -4.9    | -5.8    | 5.7      | 2.4      |          |          |

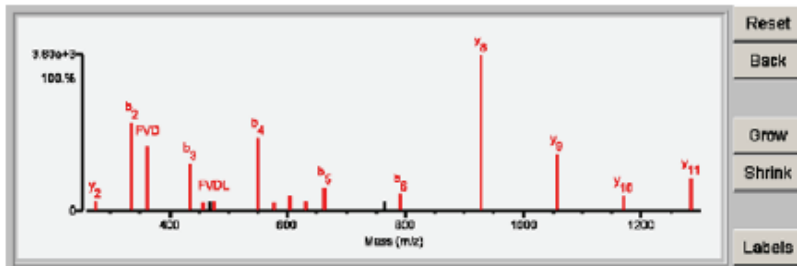



# I125

## Detailed Results

| Rank | Score | SP1 (%) | BC8 | # Unmatched Ions | Sequence                                                | MH <sup>+</sup> Calculated (Da) | MH <sup>+</sup> Error (Da) | MH <sup>+</sup> Error (ppm) | Protein MW(pI) (Da) | Species | Accession #            | MS-Digest Index #      | Protein Name                                    |
|------|-------|---------|-----|------------------|---------------------------------------------------------|---------------------------------|----------------------------|-----------------------------|---------------------|---------|------------------------|------------------------|-------------------------------------------------|
| 1    | 10.78 | 78.4    | 8   | 10/25            | (N) Y D I A T A E I F A Q / T R E L I V I P Y / P R (I) | 1878.9269                       | -0.0021                    | -1.1                        | 50135.8/4.84        | HUMAN   | <a href="#">Q71U38</a> | <a href="#">837877</a> | Tubulin alpha-1A chain - Homo sapiens (Human)   |
| 1    | 10.78 | 78.4    | 8   | 10/25            | (N) Y D I A T A E I F A Q / T R E L I V I P Y / P R (I) | 1878.9269                       | -0.0021                    | -1.1                        | 50161.8/4.84        | HUMAN   | <a href="#">P88383</a> | <a href="#">837888</a> | Tubulin alpha-1B chain - Homo sapiens (Human)   |
| 1    | 10.78 | 78.4    | 8   | 10/25            | (N) Y D I A T A E I F A Q / T R E L I V I P Y / P R (I) | 1878.9269                       | -0.0021                    | -1.1                        | 48895.8/4.88        | HUMAN   | <a href="#">Q8BQE3</a> | <a href="#">837707</a> | Tubulin alpha-1C chain - Homo sapiens (Human)   |
| 1    | 10.78 | 78.4    | 8   | 10/25            | (N) Y D I A T A E I F A Q / T R E L I V I P Y / P R (I) | 1878.9269                       | -0.0021                    | -1.1                        | 48868.8/4.87        | HUMAN   | <a href="#">Q13748</a> | <a href="#">837789</a> | Tubulin alpha-3C/D chain - Homo sapiens (Human) |
| 1    | 10.78 | 78.4    | 8   | 10/25            | (N) Y D I A T A E I F A Q / T R E L I V I P Y / P R (I) | 1878.9269                       | -0.0021                    | -1.1                        | 48818.8/4.87        | HUMAN   | <a href="#">G8PFE2</a> | <a href="#">837801</a> | Tubulin alpha-3E chain - Homo sapiens (Human)   |
| 1    | 10.78 | 78.4    | 8   | 10/25            | (N) Y D I A T A E I F A Q / T R E L I V I P Y / P R (I) | 1878.9269                       | -0.0021                    | -1.1                        | 48824.7/4.85        | HUMAN   | <a href="#">P88386</a> | <a href="#">837827</a> | Tubulin alpha-4A chain - Homo sapiens (Human)   |
| 1    | 10.78 | 78.4    | 8   | 10/25            | (N) Y D I A T A E I F A Q / T R E L I V I P Y / P R (I) | 1878.9269                       | -0.0021                    | -1.1                        | 50083.8/4.84        | HUMAN   | <a href="#">G8NY85</a> | <a href="#">837881</a> | Tubulin alpha-8 chain - Homo sapiens (Human)    |

  

| Fragment-Ion (m/z)      | 70.094 | 88.094 | 206.086 | 272.178 | 278.130 | 418.178 | 488.228 | 617.228 | 682.288 | 651.188 | 828.283 | 831.356 | 845.250 | 848.277 | 860.258 | 700.338*2 | 783.336 | 847.377 | 872.480*2 | 884.414 | 884.464 | 869.513 | 1234.870 | 1248.683 | 1348.814 |
|-------------------------|--------|--------|---------|---------|---------|---------|---------|---------|---------|---------|---------|---------|---------|---------|---------|-----------|---------|---------|-----------|---------|---------|---------|----------|----------|----------|
| Frac. Inten. (% of TIC) | 0.00   | 0.06   | 1.38    | 4.43    | 2.93    | 3.05    | 3.24    | 1.67    | 33.51   | 3.47    | 5.55    | 8.97    | 1.45    | 2.11    | 1.48    | 1.92      | 2.03    | 2.20    | 4.12      | 1.92    | 1.68    | 1.63    | 2.31     | 9.06     | 1.79     |
| Rel. Inten. (% of BP)   | 0.00   | 0.19   | 4.11    | 13.21   | 8.75    | 6.13    | 9.65    | 4.98    | 100.00  | 7.38    | 16.58   | 26.78   | 4.36    | 6.28    | 4.41    | 5.72      | 6.07    | 6.57    | 12.30     | 5.74    | 5.02    | 4.88    | 6.88     | 27.02    | 5.38     |
| Score                   | 0.20   | 0.22   | -0.34   | 1.50    | -0.09   | 0.50    | 0.25    | 0.50    | 1.50    | -0.07   | 0.25    | 1.50    | -0.34   | 0.50    | -0.34   | -0.05     | 0.50    | -0.07   | -0.12     | -0.06   | -0.05   | 1.50    | 1.50     | 0.50     | 0.50     |
| Ion-type                | PR     | LI     |         | Y2      | b3      | b4-H2O  | b4      | y4      |         | b5-H2O  | y5      | b5      |         |         |         | b6        |         |         |           |         |         | y6      | y10      | b10      | b11      |
| Delta ppm               | -11.8  | -25.9  |         | 4.7     |         | -18.2   | -1.2    | -8.8    | -3.8    |         | -4.5    | -2.4    |         |         |         | -12.2     |         |         |           |         |         | -18.3   | 9.5      | -12.1    | -23.7    |

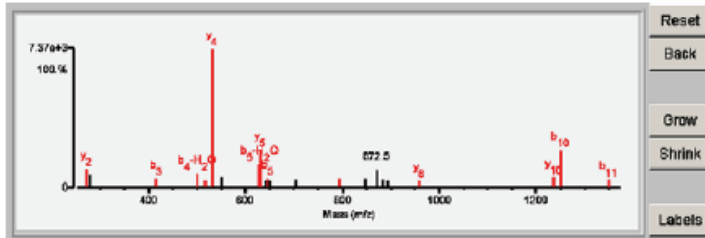

# I126

## Detailed Results

| Rank | Score | SP1 (%) | BC8 | # Unmatched Ions | Sequence                                  | MH <sup>+</sup> Calculated (Da) | MH <sup>+</sup> Error (Da) | MH <sup>+</sup> Error (ppm) | Protein MW(pI) (Da) | Species | Accession #            | MS-Digest Index #      | Protein Name                                  |
|------|-------|---------|-----|------------------|-------------------------------------------|---------------------------------|----------------------------|-----------------------------|---------------------|---------|------------------------|------------------------|-----------------------------------------------|
| 1    | 11.23 | 88.8    | 6   | 11/26            | (V) F V I D L I E I P T V I D E V / R (T) | 1818.7886                       | 0.0128                     | 7.8                         | 50135.8/4.84        | HUMAN   | <a href="#">Q71U38</a> | <a href="#">837877</a> | Tubulin alpha-1A chain - Homo sapiens (Human) |
| 1    | 11.23 | 88.8    | 6   | 11/26            | (V) F V I D L I E I P T V I D E V / R (T) | 1818.7886                       | 0.0128                     | 7.8                         | 50161.8/4.84        | HUMAN   | <a href="#">P88383</a> | <a href="#">837888</a> | Tubulin alpha-1B chain - Homo sapiens (Human) |
| 1    | 11.23 | 88.8    | 6   | 11/26            | (V) F V I D L I E I P T V I D E V / R (T) | 1818.7886                       | 0.0128                     | 7.8                         | 48895.8/4.88        | HUMAN   | <a href="#">Q8BQE3</a> | <a href="#">837707</a> | Tubulin alpha-1C chain - Homo sapiens (Human) |

  

| Fragment-Ion (m/z)      | 72.085 | 88.100 | 120.082 | 175.120 | 238.088 | 243.142 | 287.058 | 335.160 | 460.173 | 457.234 | 484.788 | 481.163 | 535.284 | 683.263 | 831.338*2 | 882.284 | 728.318 | 784.748 | 770.927 | 778.331 | 788.374*2 | 828.504 | 1067.653 | 1170.609 | 1285.888 |
|-------------------------|--------|--------|---------|---------|---------|---------|---------|---------|---------|---------|---------|---------|---------|---------|-----------|---------|---------|---------|---------|---------|-----------|---------|----------|----------|----------|
| Frac. Inten. (% of TIC) | 6.57   | 0.15   | 0.05    | 1.90    | 3.65    | 2.50    | 2.13    | 3.23    | 13.78   | 2.13    | 1.78    | 2.65    | 3.95    | 5.72    | 3.51      | 2.50    | 1.89    | 2.10    | 2.93    | 1.98    | 1.81      | 20.95   | 7.62     | 2.03     | 2.36     |
| Rel. Inten. (% of BP)   | 31.83  | 0.71   | 0.28    | 9.06    | 17.49   | 11.91   | 10.15   | 15.41   | 65.79   | 10.16   | 8.50    | 12.63   | 18.90   | 27.32   | 16.74     | 11.92   | 9.04    | 10.04   | 13.98   | 9.47    | 8.65      | 100.00  | 36.38    | 9.67     | 11.28    |
| Score                   | -0.32  | 0.22   | 1.00    | 1.50    | -0.17   | 0.75    | -0.10   | 0.50    | 0.50    | 0.75    | 1.50    | -0.13   | 0.50    | 0.50    | -0.17     | 0.50    | -0.09   | -0.10   | -0.14   | -0.09   | -0.09     | 1.50    | 1.50     | -0.10    | 1.50     |
| Ion-type                | LI     | F      |         | y1      | b2      | LE      |         | b2      | IDEV    | y**3    | b4      | b4      |         |         |           | b5      |         |         |         |         | y6        | y8      | y9       | y11      |          |
| Delta ppm               |        | 36.9   | 9.4     | 7.7     |         | 28.5    |         | 18.5    | 4.5     | 7.0     | 21.2    |         | 8.4     | -3.5    |           | -18.2   |         |         |         |         | -6.3      | 0.7     |          | 3.2      |          |

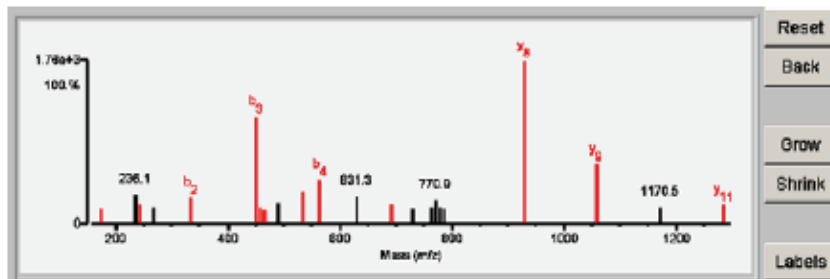

Detailed Results

| Rank | Score | SPI (%) | BCS | # Unmatched Ions | Sequence                                | MH <sup>+</sup> Calculated (Da) | MH <sup>+</sup> Error (Da) | MH <sup>+</sup> Error (ppm) | Protein MW/pl (Da) | Species | Accession #            | MS-Digest Index #      | Protein Name                                 |
|------|-------|---------|-----|------------------|-----------------------------------------|---------------------------------|----------------------------|-----------------------------|--------------------|---------|------------------------|------------------------|----------------------------------------------|
| 1    | 10.90 | 71.2    | 8   | 10/25            | (R) A I L V I D L E P G T N D S V R (S) | 1703.8343                       | -0.0177                    | -10.4                       | 49907.314.78       | HUMAN   | <a href="#">Q13885</a> | <a href="#">638049</a> | Tubulin beta-2A chain - Homo sapiens (Human) |
| 1    | 10.90 | 71.2    | 8   | 10/25            | (R) A I L V I D L E P G T N D S V R (S) | 1703.8343                       | -0.0177                    | -10.4                       | 49953.414.78       | HUMAN   | <a href="#">Q9BVA1</a> | <a href="#">638059</a> | Tubulin beta-2B chain - Homo sapiens (Human) |
| 1    | 10.90 | 71.2    | 8   | 10/25            | (R) A I L V I D L E P G T N D S V R (S) | 1703.8343                       | -0.0177                    | -10.4                       | 50433.014.83       | HUMAN   | <a href="#">Q13509</a> | <a href="#">638147</a> | Tubulin beta-3 chain - Homo sapiens (Human)  |
| 1    | 10.90 | 71.2    | 8   | 10/25            | (R) A I L V I D L E P G T N D S V R (S) | 1703.8343                       | -0.0177                    | -10.4                       | 49671.114.78       | HUMAN   | <a href="#">P07437</a> | <a href="#">638207</a> | Tubulin beta chain - Homo sapiens (Human)    |

  

| Fragment-Ion (m/z)      | 70.066 | 72.082 | 86.098 | 94.065 | 110.071 | 120.079 | 136.076 | 159.077 | 175.122 | 273.128 | 328.180 | 361.216 | 386.212 | 476.199 | 485.277 | 536.793 <sup>+2</sup> | 577.314 | 600.315 | 669.294 | 690.356 | 713.378 | 862.405 | 991.448 | 1072.581 | 1219.551 |
|-------------------------|--------|--------|--------|--------|---------|---------|---------|---------|---------|---------|---------|---------|---------|---------|---------|-----------------------|---------|---------|---------|---------|---------|---------|---------|----------|----------|
| Frac. Inten. (% of TIC) | 0.00   | 0.10   | 0.49   | 2.27   | 2.19    | 3.55    | 3.61    | 2.16    | 2.92    | 9.13    | 4.95    | 2.06    | 11.74   | 2.34    | 5.92    | 4.14                  | 2.02    | 2.12    | 2.61    | 3.40    | 2.02    | 19.01   | 4.19    | 2.73     | 4.34     |
| Rel. Inten. (% of BP)   | 0.03   | 0.52   | 2.60   | 11.92  | 11.50   | 18.96   | 19.01   | 11.35   | 15.36   | 48.03   | 26.02   | 10.81   | 61.77   | 12.32   | 31.15   | 21.77                 | 10.62   | 11.15   | 13.73   | 17.87   | 10.84   | 100.00  | 22.03   | 14.35    | 22.86    |
| Score                   | 0.20   | 0.50   | 0.22   | -0.12  | -0.12   | -0.19   | -0.19   | 0.75    | 1.50    | 0.50    | 0.75    | 1.50    | 0.50    | -0.12   | 0.50    | -0.22                 | -0.11   | 0.50    | -0.14   | -0.18   | 0.50    | 1.50    | 1.50    | -0.14    | 1.50     |
| Ion-type                | PR     | V      | LI     |        |         |         |         | GT      | y1      | b2      | VDL     | y3      | b3      |         | b4      |                       | b5      |         |         |         | b6      | y6      | y9      | y11      |          |
| Delta ppm               | 6.8    | 14.2   | 13.6   |        |         |         |         |         |         | -0.5    | -23.1   | -10.5   | 0.5     |         | -6.0    |                       |         |         |         |         | -18.1   | -4.1    | -3.7    |          | -9.5     |

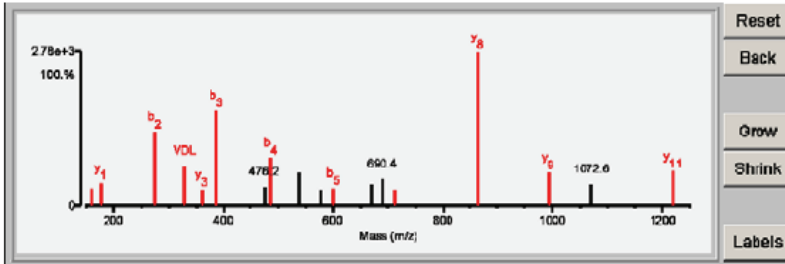

Detailed Results

| Rank | Score | SPI (%) | BCS | # Unmatched Ions | Sequence                                    | MH <sup>+</sup> Calculated (Da) | MH <sup>+</sup> Error (Da) | MH <sup>+</sup> Error (ppm) | Protein MW/pl (Da) | Species | Accession #            | MS-Digest Index #      | Protein Name                                 |
|------|-------|---------|-----|------------------|---------------------------------------------|---------------------------------|----------------------------|-----------------------------|--------------------|---------|------------------------|------------------------|----------------------------------------------|
| 1    | 22.84 | 99.1    | 9   | 1/26             | (A) I L I V I D I L R I P G T M D S V R (S) | 1892.7872                       | -0.0020                    | -1.2                        | 49607.314.78       | HUMAN   | <a href="#">Q13885</a> | <a href="#">638049</a> | Tubulin beta-2A chain - Homo sapiens (Human) |
| 1    | 22.84 | 99.1    | 9   | 1/26             | (A) I L I V I D I L R I P G T M D S V R (S) | 1892.7872                       | -0.0020                    | -1.2                        | 49853.414.78       | HUMAN   | <a href="#">Q9BVA1</a> | <a href="#">638059</a> | Tubulin beta-2B chain - Homo sapiens (Human) |
| 1    | 22.84 | 99.1    | 9   | 1/26             | (A) I L I V I D I L R I P G T M D S V R (S) | 1892.7872                       | -0.0020                    | -1.2                        | 50433.014.83       | HUMAN   | <a href="#">Q13509</a> | <a href="#">638147</a> | Tubulin beta-3 chain - Homo sapiens (Human)  |
| 1    | 22.84 | 99.1    | 9   | 1/26             | (A) I L I V I D I L R I P G T M D S V R (S) | 1892.7872                       | -0.0020                    | -1.2                        | 49671.114.78       | HUMAN   | <a href="#">P07437</a> | <a href="#">638207</a> | Tubulin beta chain - Homo sapiens (Human)    |

  

| Fragment-Ion (m/z)      | 72.081 | 86.098 | 175.118 | 316.176 | 328.187 | 343.208 | 368.198 | 381.215 | 414.240 | 431.708 <sup>+2</sup> | 441.258 | 457.229 | 629.288 | 670.302 | 807.284 | 842.348 | 861.306 <sup>+2</sup> | 748.410 | 755.348 | 771.385 | 882.405 | 891.448 | 1104.643 | 1219.580 | 1318.921 |
|-------------------------|--------|--------|---------|---------|---------|---------|---------|---------|---------|-----------------------|---------|---------|---------|---------|---------|---------|-----------------------|---------|---------|---------|---------|---------|----------|----------|----------|
| Frac. Inten. (% of TIC) | 0.05   | 0.22   | 1.19    | 14.46   | 7.24    | 0.79    | 1.12    | 0.91    | 6.16    | 1.09                  | 0.90    | 3.21    | 9.79    | 1.29    | 0.93    | 5.35    | 0.85                  | 0.87    | 0.83    | 2.03    | 27.50   | 5.73    | 2.03     | 5.67     | 0.81     |
| Rel. Inten. (% of BP)   | 0.18   | 0.79   | 4.32    | 52.57   | 26.32   | 2.87    | 4.07    | 3.32    | 22.41   | 3.95                  | 3.27    | 8.02    | 35.58   | 4.69    | 3.37    | 19.47   | 3.10                  | 3.15    | 3.01    | 7.37    | 100.00  | 20.83   | 7.38     | 20.63    | 2.93     |
| Score                   | 0.50   | 0.22   | 1.50    | 0.50    | 0.75    | 0.50    | 0.75    | 1.50    | 0.50    | 1.50                  | 0.75    | 0.75    | 0.50    | 0.75    | 1.50    | 0.50    | 0.50                  | -0.03   | 1.50    | 0.50    | 1.50    | 1.50    | 1.50     | 1.50     | 1.50     |
| Ion-type                | V      | LI     | y1      | b2      | VDL     | y3+H2O  | DLE     | y3      | b3      | y5 <sup>-2</sup>      | LVDL    | VDLE    | b4      | LVDLE   | y5      | b5      | y12-NH3 <sup>-2</sup> | y7      | b5      | y8      | y9      | y10     | y11      | y12      |          |
| Delta ppm               | 4.5    | -3.8   | -6.0    | 0.0     | -3.0    | -3.3    | 9.8     | -12.4   | -7.5    | 0.7                   | -31.9   | -2.2    | -4.2    | -22.2   | -4.6    | -9.7    |                       |         |         |         |         |         |          |          |          |

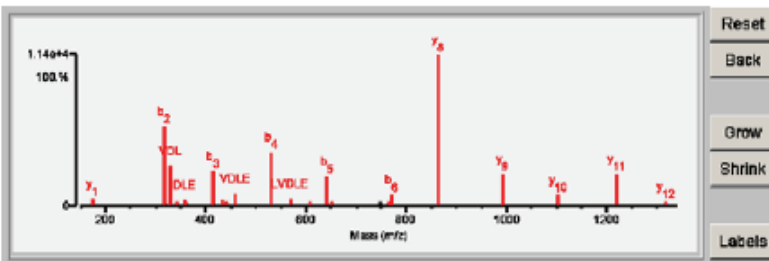

Detailed Results

| Rank | Score | SPI (%) | BCS | # Unmatched Ions | Sequence                                                     | MH <sup>+</sup> Calculated (Da) | MH <sup>+</sup> Error (Da) | MH <sup>+</sup> Error (ppm) | Protein MWipl (Da) | Species | Accession #            | MS-Digest Index #      | Protein Name                                 |
|------|-------|---------|-----|------------------|--------------------------------------------------------------|---------------------------------|----------------------------|-----------------------------|--------------------|---------|------------------------|------------------------|----------------------------------------------|
| 1    | 17.00 | 84.8    | 10  | 8/25             | (W)A K G H Y T E G A N I L V D / S / V / L / D V / V / R (K) | 2381.1284                       | 0.0276                     | 11.8                        | 48807.314.78       | HUMAN   | <a href="#">Q13885</a> | <a href="#">638049</a> | Tubulin beta-2A chain - Homo sapiens (Human) |
| 1    | 17.00 | 84.8    | 10  | 8/25             | (W)A K G H Y T E G A N I L V D / S / V / L / D V / V / R (K) | 2381.1284                       | 0.0276                     | 11.8                        | 48863.414.78       | HUMAN   | <a href="#">Q9BVA1</a> | <a href="#">638059</a> | Tubulin beta-2B chain - Homo sapiens (Human) |
| 1    | 17.00 | 84.8    | 10  | 8/25             | (W)A K G H Y T E G A N I L V D / S / V / L / D V / V / R (K) | 2381.1284                       | 0.0276                     | 11.8                        | 48831.314.79       | HUMAN   | <a href="#">P68371</a> | <a href="#">638067</a> | Tubulin beta-2C chain - Homo sapiens (Human) |
| 1    | 17.00 | 84.8    | 10  | 8/25             | (W)A K G H Y T E G A N I L V D / S / V / L / D V / V / R (K) | 2381.1284                       | 0.0276                     | 11.8                        | 60483.014.83       | HUMAN   | <a href="#">Q13609</a> | <a href="#">638147</a> | Tubulin beta-3 chain - Homo sapiens (Human)  |
| 1    | 17.00 | 84.8    | 10  | 8/25             | (W)A K G H Y T E G A N I L V D / S / V / L / D V / V / R (K) | 2381.1284                       | 0.0276                     | 11.8                        | 48671.114.78       | HUMAN   | <a href="#">P07437</a> | <a href="#">638207</a> | Tubulin beta chain - Homo sapiens (Human)    |

  

| Fragment-Ion (m/z)      | 72.082 | 86.088 | 94.087 | 175.120 | 274.186 | 488.290 | 623.189 <sup>+2</sup> | 688.741 <sup>+2</sup> | 687.721 <sup>+2</sup> | 801.579           | 834.266 <sup>+2</sup> | 844.271 <sup>+2</sup> | 878.787 <sup>+2</sup> | 890.786 <sup>+2</sup> | 700.443            | 740.358 | 787.470 | 798.362               | 882.368 <sup>+2</sup> | 902.503 | 1001.667 | 1114.880 | 1174.460 | 1287.607 | 1380.672 |      |
|-------------------------|--------|--------|--------|---------|---------|---------|-----------------------|-----------------------|-----------------------|-------------------|-----------------------|-----------------------|-----------------------|-----------------------|--------------------|---------|---------|-----------------------|-----------------------|---------|----------|----------|----------|----------|----------|------|
| Frac. Inten. (% of TIC) | 0.12   | 0.30   | 2.55   | 2.12    | 1.41    | 4.38    | 1.58                  | 2.22                  | 5.01                  | 9.90              | 12.49                 | 3.40                  | 1.74                  | 8.75                  | 2.77               | 2.75    | 2.75    | 3.31                  | 1.40                  | 2.46    | 15.82    | 7.11     | 1.41     | 1.42     | 4.09     | 1.49 |
| Rel. Inten. (% of BP)   | 0.78   | 1.87   | 15.19  | 13.40   | 8.89    | 27.57   | 10.02                 | 14.04                 | 31.65                 | 62.60             | 78.99                 | 21.47                 | 11.01                 | 55.30                 | 17.48              | 17.36   | 20.52   | 8.84                  | 15.58                 | 100.00  | 44.93    | 8.89     | 9.00     | 25.84    | 9.39     |      |
| Score                   | 0.50   | 0.22   | -0.16  | 1.50    | 1.50    | 1.50    | -0.10                 | 0.50                  | -0.32                 | 1.50              | 0.50                  | -0.21                 | 0.50                  | 0.50                  | 1.50               | 0.50    | 1.50    | -0.09                 | 0.25                  | 1.50    | 1.50     | 1.50     | -0.09    | 0.50     | 0.50     |      |
| Ion-type                | V      | V      | LI     | y1      | y2      | y4      | bg <sup>+2</sup>      | bg <sup>+2</sup>      | y5                    | b10 <sup>+2</sup> | b11 <sup>+2</sup>     | a11 <sup>+2</sup>     | b11 <sup>+2</sup>     | y6                    | b <sup>+++12</sup> | y7      | y7      | b14+H2O <sup>+2</sup> | y8                    | y8      | y9       | y10      | b10      | b11      |          |      |
| Delta ppm               | 17.0   | 19.4   |        | 8.3     | -8.6    | 14.9    |                       | 25.6                  |                       | 10.2              | 12.1                  |                       | 7.6                   | 12.4                  | 11.0               | 15.9    | 3.9     | 8.8                   | 8.8                   | 10.2    | 3.9      | 12.2     | 15.3     | -0.1     |          |      |

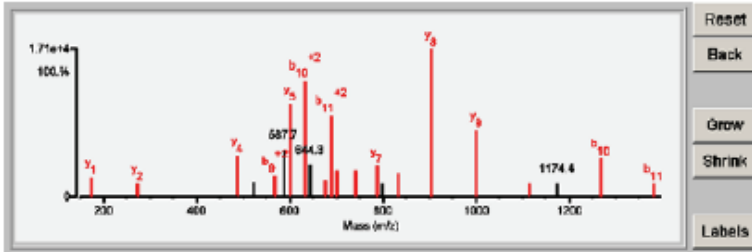

Detailed Results

| Rank | Score | SPI (%) | BCS | # Unmatched Ions | Sequence                                                 | MH <sup>+</sup> Calculated (Da) | MH <sup>+</sup> Error (Da) | MH <sup>+</sup> Error (ppm) | Protein MWipl (Da) | Species | Accession #            | MS-Digest Index #      | Protein Name                                 |
|------|-------|---------|-----|------------------|----------------------------------------------------------|---------------------------------|----------------------------|-----------------------------|--------------------|---------|------------------------|------------------------|----------------------------------------------|
| 1    | 14.31 | 69.9    | 10  | 8/25             | (K)G H Y T E G A N I L V D / S / V / L / D V / V / R (K) | 2046.9801                       | 0.0021                     | 1.0                         | 49907.314.78       | HUMAN   | <a href="#">Q13885</a> | <a href="#">638049</a> | Tubulin beta-2A chain - Homo sapiens (Human) |
| 1    | 14.31 | 69.9    | 10  | 8/25             | (K)G H Y T E G A N I L V D / S / V / L / D V / V / R (K) | 2046.9801                       | 0.0021                     | 1.0                         | 49953.414.78       | HUMAN   | <a href="#">Q9BVA1</a> | <a href="#">638059</a> | Tubulin beta-2B chain - Homo sapiens (Human) |
| 1    | 14.31 | 69.9    | 10  | 8/25             | (K)G H Y T E G A N I L V D / S / V / L / D V / V / R (K) | 2046.9801                       | 0.0021                     | 1.0                         | 49831.314.79       | HUMAN   | <a href="#">P68371</a> | <a href="#">638067</a> | Tubulin beta-2C chain - Homo sapiens (Human) |
| 1    | 14.31 | 69.9    | 10  | 8/25             | (K)G H Y T E G A N I L V D / S / V / L / D V / V / R (K) | 2046.9801                       | 0.0021                     | 1.0                         | 50433.014.83       | HUMAN   | <a href="#">Q13509</a> | <a href="#">638147</a> | Tubulin beta-3 chain - Homo sapiens (Human)  |
| 1    | 14.31 | 69.9    | 10  | 8/25             | (K)G H Y T E G A N I L V D / S / V / L / D V / V / R (K) | 2046.9801                       | 0.0021                     | 1.0                         | 49671.114.78       | HUMAN   | <a href="#">P07437</a> | <a href="#">638207</a> | Tubulin beta chain - Homo sapiens (Human)    |

  

| Fragment-Ion (m/z)      | 70.067 | 72.081 | 86.096 | 94.086 | 110.070 | 136.075 | 175.119 | 185.162 | 214.101 | 257.127 | 373.252 | 488.276 | 601.366 | 606.277 | 650.837 <sup>+2</sup> | 700.445 | 730.283 <sup>+2</sup> | 737.379 | 787.469 | 804.276 | 884.481 | 902.487 | 933.350 | 1001.551 | 1046.423 |
|-------------------------|--------|--------|--------|--------|---------|---------|---------|---------|---------|---------|---------|---------|---------|---------|-----------------------|---------|-----------------------|---------|---------|---------|---------|---------|---------|----------|----------|
| Frac. Inten. (% of TIC) | 0.00   | 0.52   | 0.83   | 6.84   | 0.12    | 0.29    | 6.44    | 2.47    | 6.04    | 3.18    | 3.66    | 5.48    | 11.50   | 3.18    | 2.54                  | 3.06    | 3.28                  | 2.58    | 4.18    | 2.55    | 2.76    | 10.03   | 10.12   | 2.84     | 6.51     |
| Rel. Inten. (% of BP)   | 0.02   | 4.52   | 7.23   | 59.48  | 1.01    | 2.50    | 47.33   | 21.49   | 62.50   | 27.48   | 31.83   | 47.66   | 100.00  | 27.66   | 22.12                 | 26.63   | 28.48                 | 22.44   | 36.34   | 22.21   | 24.04   | 87.18   | 87.98   | 24.69    | 56.62    |
| Score                   | 0.20   | 0.50   | 0.22   | -0.59  | 1.00    | 1.00    | 1.50    | 1.50    | -0.21   | -0.52   | -0.27   | 1.50    | 1.50    | -0.28   | -0.22                 | 1.50    | -0.28                 | -0.22   | 1.50    | 0.50    | 0.50    | 1.50    | 0.50    | 1.50     | 0.50     |
| Ion-type                | PR     | V      | LI     | H      | Y       | y1      | y3      | y4      | y5      | y6      | y6      | y6      | y6      | y6      | y6                    | y6      | y6                    | y6      | y7      | b7      | y6-H2O  | y8      | b8      | y9       | b9       |
| Delta ppm               | 28.2   | 0.3    | -0.3   |        | -8.8    | -5.1    | -1.4    |         | -9.9    | -14.6   | -1.8    |         |         |         | 14.3                  |         |                       | 1.7     | -28.7   | -3.1    | -7.4    | 9.2     | -11.9   | -2.6     |          |

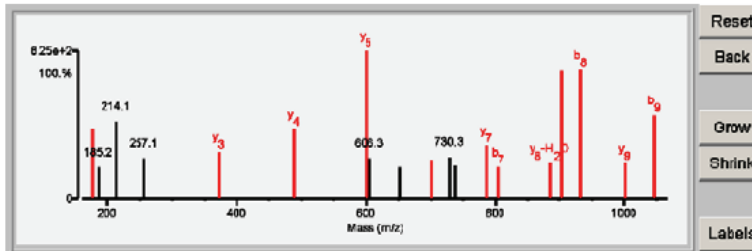

# I131

## Detailed Results

| Rank | Score | SPI (%) | BCS | # Unmatched Ions | Sequence                                          | MH <sup>+</sup> Calculated (Da) | MH <sup>+</sup> Error (Da) | MH <sup>+</sup> Error (ppm) | Protein MW(pI) (Da) | Species | Accession #            | MS-Digest Index #      | Protein Name                                 |
|------|-------|---------|-----|------------------|---------------------------------------------------|---------------------------------|----------------------------|-----------------------------|---------------------|---------|------------------------|------------------------|----------------------------------------------|
| 1    | 17.36 | 90.8    | 12  | 4/25             | (G) E V Y T E G A A E L V D / S V L D / V V R (K) | 1989.9586                       | 0.0118                     | 5.9                         | 49907.3/4.78        | HUMAN   | <a href="#">Q13885</a> | <a href="#">638049</a> | Tubulin beta-2A chain - Homo sapiens (Human) |
| 1    | 17.36 | 90.8    | 12  | 4/25             | (G) E V Y T E G A A E L V D / S V L D / V V R (K) | 1989.9586                       | 0.0118                     | 5.9                         | 49953.4/4.78        | HUMAN   | <a href="#">Q9BVA1</a> | <a href="#">638059</a> | Tubulin beta-2B chain - Homo sapiens (Human) |
| 1    | 17.36 | 90.8    | 12  | 4/25             | (G) E V Y T E G A A E L V D / S V L D / V V R (K) | 1989.9586                       | 0.0118                     | 5.9                         | 49831.3/4.79        | HUMAN   | <a href="#">P68371</a> | <a href="#">638067</a> | Tubulin beta-2C chain - Homo sapiens (Human) |
| 1    | 17.36 | 90.8    | 12  | 4/25             | (G) E V Y T E G A A E L V D / S V L D / V V R (K) | 1989.9586                       | 0.0118                     | 5.9                         | 50433.0/4.83        | HUMAN   | <a href="#">Q13509</a> | <a href="#">638147</a> | Tubulin beta-3 chain - Homo sapiens (Human)  |
| 1    | 17.36 | 90.8    | 12  | 4/25             | (G) E V Y T E G A A E L V D / S V L D / V V R (K) | 1989.9586                       | 0.0118                     | 5.9                         | 49671.1/4.78        | HUMAN   | <a href="#">P07437</a> | <a href="#">638207</a> | Tubulin beta chain - Homo sapiens (Human)    |

  

| Fragment-Ion (m/z)      | 60.045 | 70.064 | 72.080 | 86.097 | 101.072 | 116.069 | 120.079 | 136.073 | 175.118 | 198.068 | 215.111 | 226.070 | 373.250 | 389.131 | 415.219 | 488.283 | 544.739 <sup>+2</sup> | 601.365 | 676.240 | 747.279 | 787.467 | 876.321 | 902.497 | 989.405 | 1001.552 |
|-------------------------|--------|--------|--------|--------|---------|---------|---------|---------|---------|---------|---------|---------|---------|---------|---------|---------|-----------------------|---------|---------|---------|---------|---------|---------|---------|----------|
| Frac. Inten. (% of TIC) | 2.85   | 0.00   | 0.59   | 0.81   | 2.02    | 2.14    | 2.17    | 0.08    | 5.03    | 2.25    | 2.27    | 2.89    | 6.47    | 2.81    | 2.22    | 4.28    | 2.69                  | 11.91   | 2.43    | 3.64    | 5.04    | 16.19   | 9.63    | 6.06    | 3.54     |
| Rel. Inten. (% of BP)   | 17.58  | 0.01   | 3.62   | 5.00   | 12.48   | 13.19   | 13.43   | 0.47    | 31.07   | 13.90   | 14.02   | 17.88   | 39.97   | 17.38   | 13.70   | 26.45   | 16.62                 | 73.58   | 15.02   | 22.48   | 31.13   | 100.00  | 59.53   | 37.44   | 21.89    |
| Score                   |        | -0.18  | 0.20   | 0.50   | 0.22    | -0.12   | -0.13   | 1.00    | 1.50    | 0.50    | 0.75    | 0.50    | 1.50    | 0.50    | 0.75    | 1.50    | 0.50                  | 1.50    | 0.50    | 0.50    | 1.50    | 0.50    | 1.50    | 0.50    | 1.50     |
| Ion-type                |        | FR     | V      | V      | LI      | LI      | LI      | Y       | Y1      | a1      | DV      | b1      | y3      | b2      | SVLD    | y4      | bg <sup>+2</sup>      | y5      | b5      | b6      | y7      | b7      | y8      | b8      | y8       |
| Delta ppm               |        | -16.1  | -6.6   | 2.0    |         |         |         | -21.2   | -6.8    | -13.4   | 34.7    | 18.7    | -16.0   | 6.2     | -3.2    | 1.4     | -2.1                  | -2.3    | -1.6    | 2.2     | -0.9    | 0.8     | 3.4     | 0.8     | -11.0    |

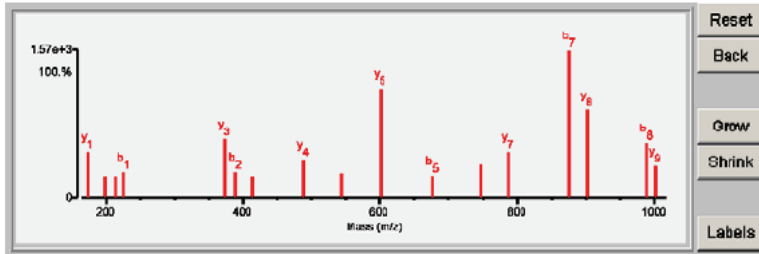

# I132

## Detailed Results

| Rank | Score | SPI (%) | BCS | # Unmatched Ions | Sequence                                      | MH <sup>+</sup> Calculated (Da) | MH <sup>+</sup> Error (Da) | MH <sup>+</sup> Error (ppm) | Protein MW(pI) (Da) | Species | Accession #            | MS-Digest Index #      | Protein Name                                 |
|------|-------|---------|-----|------------------|-----------------------------------------------|---------------------------------|----------------------------|-----------------------------|---------------------|---------|------------------------|------------------------|----------------------------------------------|
| 1    | 12.88 | 88.8    | 8   | 11/25            | (H) I T T E G A E L V D / S V L D / V V R (K) | 1852.8987                       | 0.0081                     | 4.8                         | 49807.3/4.78        | HUMAN   | <a href="#">Q13885</a> | <a href="#">638048</a> | Tubulin beta-2A chain - Homo sapiens (Human) |
| 1    | 12.88 | 88.8    | 8   | 11/25            | (H) I T T E G A E L V D / S V L D / V V R (K) | 1852.8987                       | 0.0081                     | 4.8                         | 49863.4/4.78        | HUMAN   | <a href="#">Q9BVA1</a> | <a href="#">638058</a> | Tubulin beta-2B chain - Homo sapiens (Human) |
| 1    | 12.88 | 88.8    | 8   | 11/25            | (H) I T T E G A E L V D / S V L D / V V R (K) | 1852.8987                       | 0.0081                     | 4.8                         | 49831.3/4.79        | HUMAN   | <a href="#">P68371</a> | <a href="#">638067</a> | Tubulin beta-2C chain - Homo sapiens (Human) |
| 1    | 12.88 | 88.8    | 8   | 11/25            | (H) I T T E G A E L V D / S V L D / V V R (K) | 1852.8987                       | 0.0081                     | 4.8                         | 60433.0/4.83        | HUMAN   | <a href="#">Q13509</a> | <a href="#">638147</a> | Tubulin beta-3 chain - Homo sapiens (Human)  |
| 1    | 12.88 | 88.8    | 8   | 11/25            | (H) I T T E G A E L V D / S V L D / V V R (K) | 1852.8987                       | 0.0081                     | 4.8                         | 49671.1/4.78        | HUMAN   | <a href="#">P07437</a> | <a href="#">638207</a> | Tubulin beta chain - Homo sapiens (Human)    |

  

| Fragment-Ion (m/z)      | 80.046 | 72.080 | 84.078 | 88.086 | 84.084 | 120.078 | 136.075 | 143.083 | 176.118 | 216.102 | 338.134 | 368.117 | 388.140 | 373.264 | 488.283 | 801.384 | 833.247 | 700.433 | 738.266 | 748.328 | 787.467 | 862.333 | 902.488 | 804.481 <sup>+2</sup> | 1136.480 |
|-------------------------|--------|--------|--------|--------|--------|---------|---------|---------|---------|---------|---------|---------|---------|---------|---------|---------|---------|---------|---------|---------|---------|---------|---------|-----------------------|----------|
| Frac. Inten. (% of TIC) | 2.41   | 0.80   | 2.21   | 0.42   | 2.55   | 3.38    | 0.08    | 3.83    | 2.46    | 2.16    | 3.31    | 2.23    | 2.60    | 5.12    | 9.89    | 22.16   | 2.71    | 3.45    | 2.67    | 2.59    | 5.04    | 4.65    | 8.80    | 2.38                  | 2.49     |
| Rel. Inten. (% of BP)   | 10.86  | 3.62   | 9.97   | 1.88   | 11.61  | 15.27   | 0.37    | 17.39   | 11.10   | 9.75    | 14.93   | 10.05   | 11.74   | 23.09   | 43.27   | 100.00  | 12.23   | 15.66   | 12.03   | 11.70   | 22.75   | 21.02   | 35.70   | 10.30                 | 11.22    |
| Score                   |        | -0.11  | 0.50   | -0.10  | 0.22   | -0.12   | -0.15   | 1.00    | 1.50    | 0.75    | -0.15   | -0.10   | -0.12   | 1.50    | 1.50    | 1.50    | -0.12   | 1.50    | 0.50    | -0.12   | 1.50    | 0.50    | 1.50    | 0.50                  | 1.50     |
| Ion-type                |        | V      | V      | V      | LI     | LI      | Y       | Y1      | DV      | y3      | y4      | y5      | y5      | y5      | y4      | y5      | y5      | b5      | b6      | y7      | b7      | y8      | b8      | b10-H <sub>2</sub> O  |          |
| Delta ppm               |        | -8.0   |        | -14.2  |        |         | -6.5    | -16.0   | -9.0    |         | -4.8    | 1.0     | -5.3    |         |         |         | -3.1    | -6.8    |         | -13.1   | -14.7   | -6.1    |         | 15.6                  |          |

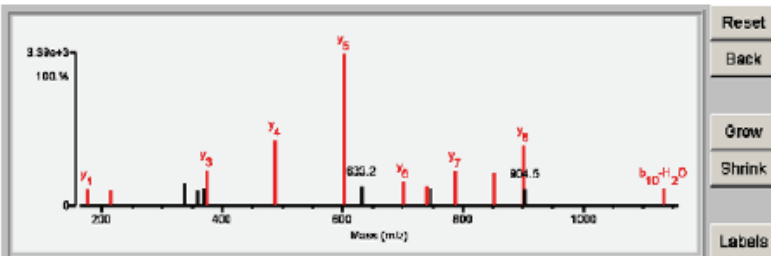

# I133

## Detailed Results

| Rank | Score | SPI (%) | BCS | # Unmatched Ions | Sequence                            | MH <sup>+</sup> Calculated (Da) | MH <sup>+</sup> Error (Da) | MH <sup>+</sup> Error (ppm) | Protein MW/pi (Da) | Species | Accession #            | MS-Digest Index #      | Protein Name                                 |
|------|-------|---------|-----|------------------|-------------------------------------|---------------------------------|----------------------------|-----------------------------|--------------------|---------|------------------------|------------------------|----------------------------------------------|
| 1    | 20.08 | 95.9    | 11  | 2/25             | (T)E(G)A(E)I(V)ID S V/L/D/V/V/R (K) | 1588.7887                       | -0.0014                    | -0.9                        | 49907.3/4.78       | HUMAN   | <a href="#">Q13885</a> | <a href="#">638049</a> | Tubulin beta-2A chain - Homo sapiens (Human) |
| 1    | 20.08 | 95.9    | 11  | 2/25             | (T)E(G)A(E)I(V)ID S V/L/D/V/V/R (K) | 1588.7887                       | -0.0014                    | -0.9                        | 49953.4/4.78       | HUMAN   | <a href="#">Q9BVA1</a> | <a href="#">638059</a> | Tubulin beta-2B chain - Homo sapiens (Human) |
| 1    | 20.08 | 95.9    | 11  | 2/25             | (T)E(G)A(E)I(V)ID S V/L/D/V/V/R (K) | 1588.7887                       | -0.0014                    | -0.9                        | 49831.3/4.79       | HUMAN   | <a href="#">P68371</a> | <a href="#">638067</a> | Tubulin beta-2C chain - Homo sapiens (Human) |
| 1    | 20.08 | 95.9    | 11  | 2/25             | (T)E(G)A(E)I(V)ID S V/L/D/V/V/R (K) | 1588.7887                       | -0.0014                    | -0.9                        | 50433.0/4.83       | HUMAN   | <a href="#">Q13509</a> | <a href="#">638147</a> | Tubulin beta-3 chain - Homo sapiens (Human)  |
| 1    | 20.08 | 95.9    | 11  | 2/25             | (T)E(G)A(E)I(V)ID S V/L/D/V/V/R (K) | 1588.7887                       | -0.0014                    | -0.9                        | 49671.1/4.78       | HUMAN   | <a href="#">P07437</a> | <a href="#">638207</a> | Tubulin beta chain - Homo sapiens (Human)    |

  

| Fragment-ion (m/z)      | 70.066 | 72.081 | 84.041 | 86.097 | 120.081 | 136.075 | 175.118 | 201.084 | 218.055 | 258.109 | 274.184 | 275.069 | 328.092 | 346.109 | 373.253 | 475.153 | 488.281 | 588.235 | 601.361 | 687.305 | 902.503 | 970.427 | 1001.568 | 1114.641 | 1243.665 |
|-------------------------|--------|--------|--------|--------|---------|---------|---------|---------|---------|---------|---------|---------|---------|---------|---------|---------|---------|---------|---------|---------|---------|---------|----------|----------|----------|
| Frac. Inten. (% of TIC) | 0.00   | 0.09   | 0.06   | 0.22   | 2.34    | 1.78    | 5.02    | 1.99    | 2.44    | 3.71    | 1.73    | 6.04    | 1.81    | 7.34    | 3.42    | 12.14   | 6.50    | 8.27    | 5.46    | 4.32    | 10.44   | 1.78    | 7.47     | 3.69     | 1.95     |
| Rel. Inten. (% of BP)   | 0.03   | 0.71   | 0.51   | 1.85   | 19.28   | 14.68   | 41.34   | 16.35   | 20.08   | 30.58   | 14.27   | 49.72   | 14.93   | 60.44   | 28.12   | 100.00  | 53.50   | 68.13   | 44.94   | 35.55   | 85.96   | 14.63   | 61.48    | 30.38    | 16.02    |
| Score                   | 0.20   | 0.50   | 1.00   | 0.22   | -0.19   | -0.15   | 1.50    | 0.75    | 0.50    | 0.75    | 1.50    | 0.60    | 0.25    | 0.50    | 1.50    | 0.50    | 1.50    | 0.50    | 1.50    | 0.50    | 1.50    | 0.25    | 1.60     | 1.50     | 1.50     |
| Ion-type                | PR     | V      | E      | LI     |         |         | y1      | AE      | b1      | GAE     | y2      | b2      | b3-H2O  | b3      | y3      | b4      | y4      | b5      | y5      | b6      | y8      | b6-H2O  | y9       | y10      | y11      |
| Delta ppm               | 5.3    | -2.4   | -35.6  | 3.2    |         |         | -4.9    | -19.3   | 26.8    | -3.7    | -11.2   | -5.1    | -17.6   | 4.0     | -7.4    | 5.2     | -4.6    | 0.2     | -10.5   | 2.9     | 10.2    | 7.7     | 5.8      | -5.4     | -19.3    |

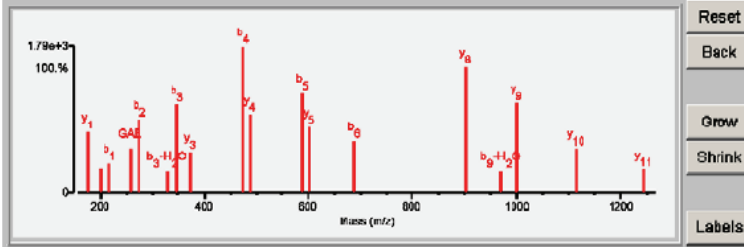

# I134

## Detailed Results

| Rank | Score | SPI (%) | BCS | # Unmatched Ions | Sequence                                 | MH <sup>+</sup> Calculated (Da) | MH <sup>+</sup> Error (Da) | MH <sup>+</sup> Error (ppm) | Protein MW/pi (Da) | Species | Accession #            | MS-Digest Index #      | Protein Name                                        |
|------|-------|---------|-----|------------------|------------------------------------------|---------------------------------|----------------------------|-----------------------------|--------------------|---------|------------------------|------------------------|-----------------------------------------------------|
| 1    | 13.50 | 77.3    | 7   | 8/24             | (R)A V T E T S V P E D V S F A E S R (R) | 1820.8120                       | 0.0074                     | 4.1                         | 132528.6/5.83      | HUMAN   | <a href="#">Q9BTW9</a> | <a href="#">638633</a> | Tubulin-specific chaperone D - Homo sapiens (Human) |

  

| Fragment-ion (m/z)      | 60.043 | 70.066 | 72.082 | 110.072 | 115.089 | 120.080 | 144.116 | 173.128 | 175.118 | 187.107 | 207.110 | 239.118 | 262.149 | 342.125 | 373.173 | 391.192 | 462.226 | 510.259 | 579.288 | 678.317 | 685.293 | 696.327 | 856.310 | 1026.417 |
|-------------------------|--------|--------|--------|---------|---------|---------|---------|---------|---------|---------|---------|---------|---------|---------|---------|---------|---------|---------|---------|---------|---------|---------|---------|----------|
| Frac. Inten. (% of TIC) | 2.79   | 0.00   | 0.70   | 0.08    | 2.74    | 0.39    | 3.03    | 2.74    | 3.24    | 3.63    | 2.85    | 3.41    | 4.73    | 3.29    | 2.82    | 5.02    | 9.54    | 3.14    | 2.48    | 2.53    | 4.53    | 23.81   | 2.92    | 9.78     |
| Rel. Inten. (% of BP)   | 11.70  | 0.01   | 2.92   | 0.35    | 11.51   | 1.65    | 12.74   | 11.49   | 13.61   | 15.25   | 11.97   | 14.34   | 19.87   | 13.82   | 11.01   | 21.10   | 40.08   | 13.17   | 10.43   | 10.64   | 19.03   | 100.00  | 12.25   | 41.07    |
| Score                   | -0.12  | 0.20   | 0.50   | 1.00    | -0.12   | 1.00    | -0.13   | -0.11   | 1.50    | 0.75    | -0.12   | 0.75    | 1.50    | 0.75    | 0.50    | 1.50    | 1.50    | -0.13   | -0.10   | 10.64   | 0.50    | 1.50    | -0.12   | 0.50     |
| Ion-type                | PR     | V      | H      |         |         | F       |         |         | y1      | VS      |         | HT      | y2      | PED     | y3-H2O  | y3      | y4      |         |         | y6-H2O  | b6      | y6      | b9      | b9       |
| Delta ppm               | 13.9   | 17.0   | 7.5    |         |         | -4.0    |         |         | -8.0    | -9.7    |         | 14.4    | -7.6    | -17.2   | -27.4   | -3.8    | -10.8   |         |         | -5.7    | -8.3    | -5.5    |         | -3.8     |

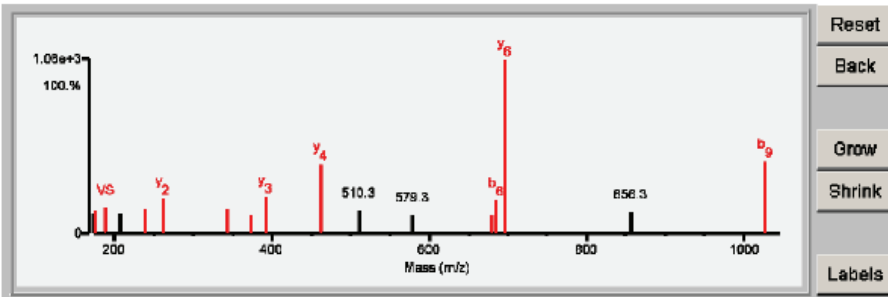

# I135

## Detailed Results

| Rank | Score | SPI (%) | BCS | # Unmatched Ions | Sequence                  | MH <sup>+</sup> Calculated (Da) | MH <sup>+</sup> Error (Da) | MH <sup>+</sup> Error (ppm) | Protein MW/pl (Da) | Species | Accession #            | MS-Digest Index #      | Protein Name                     |
|------|-------|---------|-----|------------------|---------------------------|---------------------------------|----------------------------|-----------------------------|--------------------|---------|------------------------|------------------------|----------------------------------|
| 1    | 10.65 | 66.8    | 4   | 10/25            | (K) E S T L/H/L V/L/R (L) | 1155.6191                       | 0.0076                     | 6.6                         | 8564.9/6.56        | HUMAN   | <a href="#">P62988</a> | <a href="#">677557</a> | Ubiquitin - Homo sapiens (Human) |

  

| Fragment-ion (m/z)      | 61.011 | 70.066 | 72.082 | 74.058 | 84.047 | 86.056 | 86.097 | 110.070 | 153.065 | 160.113 | 175.122 | 187.141 | 193.143 | 213.157 | 223.150 | 234.122 | 251.145 | 271.180 | 288.205          | 319.216 <sup>+2</sup> | 326.717 | 350.214 | 452.265 | 500.344              | 525.315 <sup>+2</sup> |
|-------------------------|--------|--------|--------|--------|--------|--------|--------|---------|---------|---------|---------|---------|---------|---------|---------|---------|---------|---------|------------------|-----------------------|---------|---------|---------|----------------------|-----------------------|
| Frac. Inten. (% of TIC) | 6.88   | 0.01   | 0.10   | 2.55   | 0.23   | 3.97   | 0.51   | 0.23    | 2.98    | 3.04    | 3.65    | 2.63    | 2.52    | 2.96    | 4.30    | 2.53    | 4.65    | 6.52    | 4.27             | 16.44                 | 2.45    | 3.48    | 3.86    | 6.27                 | 13.18                 |
| Rel. Inten. (% of BP)   | 40.60  | 0.03   | 0.59   | 15.49  | 1.40   | 24.13  | 3.11   | 1.37    | 18.10   | 18.47   | 22.19   | 16.01   | 15.34   | 17.98   | 26.16   | 15.37   | 28.25   | 39.68   | 25.99            | 100.00                | 14.88   | 21.17   | 23.49   | 38.14                | 80.16                 |
| Score                   | -0.41  | 0.20   | 0.50   | -0.15  | 1.00   | -0.24  | 0.22   | 1.00    | -0.18   | -0.18   | 1.60    | -0.16   | -0.15   | 0.75    | 0.50    | -0.15   | 0.75    | 0.50    | 1.50             | 1.50                  | -0.15   | 0.75    | -0.23   | 1.50                 | 0.50                  |
| Ion-type                | PR     | V      | V      | V      | E      | L      | L      | H       | L       | L       | y1      | HL-28   | VL      | HL      | y2-NH3  | HL      | y2-NH3  | y2      | y5 <sup>+2</sup> | y5 <sup>+2</sup>      | HLV     | HLV     | y4      | y9-H2O <sup>+2</sup> | y9-H2O <sup>+2</sup>  |
| Delta ppm               | 18.2   | 10.0   |        |        | 31.1   |        | 7.8    | -10.7   |         |         | 16.3    |         |         | -17.6   | -30.6   |         | -24.9   | 13.4    | 6.2              | 14.9                  |         | -15.0   |         | -22.2                | 1.8                   |

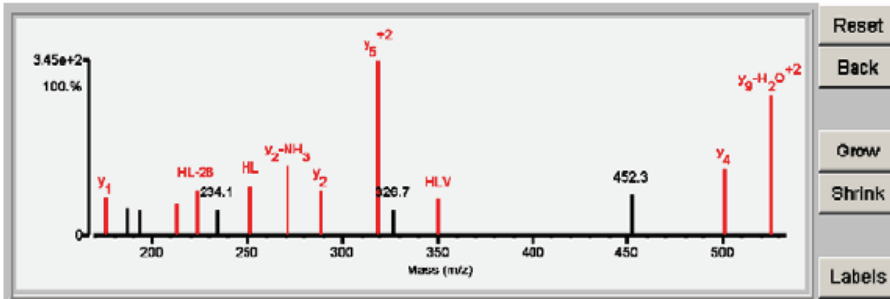

# I136

## Detailed Results

| Rank | Score | SPI (%) | BCS | # Unmatched Ions | Sequence                          | MH <sup>+</sup> Calculated (Da) | MH <sup>+</sup> Error (Da) | MH <sup>+</sup> Error (ppm) | Protein MW/pl (Da) | Species | Accession #            | MS-Digest Index #      | Protein Name                                             |
|------|-------|---------|-----|------------------|-----------------------------------|---------------------------------|----------------------------|-----------------------------|--------------------|---------|------------------------|------------------------|----------------------------------------------------------|
| 1    | 12.36 | 67.0    | 5   | 10/25            | (A) A S/P/L/I/P E E P P V/P/R (P) | 1376.6879                       | 0.0093                     | 6.7                         | 35187.18.54        | HUMAN   | <a href="#">A9MZF0</a> | <a href="#">765589</a> | Uncharacterized protein LOC728008 - Homo sapiens (Human) |

  

| Fragment-ion (m/z)      | 70.064 | 72.081 | 86.097 | 94.066 | 102.054 | 104.050 | 171.072 | 175.113 | 183.150 | 211.147 | 215.143 | 219.079 | 272.174 | 324.223 | 344.131 | 457.215 | 553.255           | 565.817 <sup>+2</sup> | 617.364 | 709.271 | 720.399 | 807.406 | 920.483 | 1033.579 | 1130.628 |
|-------------------------|--------|--------|--------|--------|---------|---------|---------|---------|---------|---------|---------|---------|---------|---------|---------|---------|-------------------|-----------------------|---------|---------|---------|---------|---------|----------|----------|
| Frac. Inten. (% of TIC) | 0.01   | 0.06   | 0.20   | 1.86   | 0.05    | 1.79    | 1.84    | 1.59    | 9.23    | 3.50    | 1.53    | 5.00    | 1.91    | 4.92    | 1.95    | 1.60    | 1.76              | 25.16                 | 1.86    | 2.29    | 1.86    | 13.23   | 7.82    | 3.70     | 5.26     |
| Rel. Inten. (% of BP)   | 0.02   | 0.26   | 0.80   | 7.38   | 0.20    | 7.12    | 7.32    | 6.33    | 36.68   | 13.92   | 6.07    | 19.86   | 7.58    | 19.55   | 7.74    | 6.38    | 7.01              | 100.00                | 7.46    | 9.09    | 7.41    | 52.58   | 31.07   | 14.71    | 20.91    |
| Score                   | 0.20   | 0.50   | 0.22   | -0.07  | 1.00    | -0.07   | -0.07   | 1.50    | 0.50    | 0.75    | -0.06   | 0.50    | 1.50    | -0.20   | 0.50    | 0.50    | -0.07             | 1.50                  | -0.07   | -0.09   | -0.07   | -0.53   | 1.50    | 1.50     | 1.50     |
| Ion-type                | PR     | V      | L      | L      | E       | E       | E       | y1      | LP-28   | LP      | a2      | a2      | y2      | b3      | b4      | b4      | y10 <sup>+2</sup> | y10 <sup>+2</sup>     |         |         |         | y8      | y9      | y10      | y10      |
| Delta ppm               | -17.5  | 4.5    | 4.3    |        | -9.4    |         |         | -34.0   | -2.7    | 6.1     |         | -8.6    | 9.5     |         | 7.1     | 5.8     | 5.7               |                       |         |         |         | -0.4    | 10.6    | 6.8      |          |

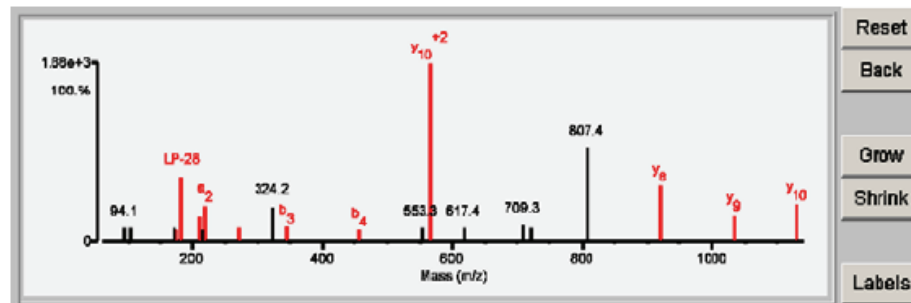

Detailed Results

| Rank                    | Score  | SP1 (%) | BCS     | # Unmatched ions | Sequence                                        | MH <sup>+</sup> Calculated (Da) | MH <sup>+</sup> Error (Da) | MH <sup>+</sup> Error (ppm) | Protein MW (Da) | Species | Accession # | MS-Digest Index # | Protein Name                    |         |         |                       |         |         |         |         |          |          |          |          |          |    |
|-------------------------|--------|---------|---------|------------------|-------------------------------------------------|---------------------------------|----------------------------|-----------------------------|-----------------|---------|-------------|-------------------|---------------------------------|---------|---------|-----------------------|---------|---------|---------|---------|----------|----------|----------|----------|----------|----|
| 1                       | 11.28  | 86.2    | 10      | 11/25            | (S) L A A D V A I I (R/T) R / P K / W T / R (T) | 1716.7880                       | 0.0047                     | 2.8                         | 68851.816.08    | HUMAN   | P08870      | 888231            | Vimentin - Homo sapiens (Human) |         |         |                       |         |         |         |         |          |          |          |          |          |    |
| Fragment-Ion (m/z)      | 72.082 | 88.087  | 176.118 | 202.080          | 268.111                                         | 275.124                         | 388.151                    | 390.208                     | 468.190         | 680.280 | 672.270     | 707.328           | 772.387                         | 787.380 | 800.384 | 802.887 <sup>+2</sup> | 812.378 | 887.422 | 828.431 | 807.423 | 1030.478 | 1034.460 | 1061.481 | 1144.617 | 1164.642 |    |
| Frag. Inten. (% of TIC) | 2.40   | 0.15    | 1.84    | 4.89             | 2.05                                            | 1.83                            | 9.27                       | 4.01                        | 20.62           | 1.75    | 5.11        | 2.91              | 3.37                            | 2.67    | 2.37    | 6.12                  | 2.18    | 2.32    | 1.97    | 3.13    | 2.75     | 1.89     | 6.18     | 5.69     | 2.51     |    |
| Rel. Inten. (% of BP)   | 11.65  | 0.75    | 8.92    | 23.71            | 9.97                                            | 8.90                            | 44.98                      | 19.46                       | 100.00          | 8.47    | 24.78       | 14.13             | 16.33                           | 12.96   | 11.50   | 29.70                 | 10.60   | 11.25   | 9.55    | 15.16   | 13.33    | 9.19     | 29.95    | 27.60    | 12.19    |    |
| Score                   | -0.12  | 0.22    | 1.50    | 0.50             | 0.75                                            | 0.50                            | 0.50                       | 1.50                        | 0.50            | -0.08   | 0.50        | -0.14             | -0.16                           | 0.50    | 1.50    | -0.30                 | -0.11   | -0.11   | 1.50    | -0.15   | 1.50     | -0.09    | -0.30    | 1.50     | -0.12    |    |
| Ion-type                | LI     | Y1      | b1      | ADA              | b2                                              | ADA                             | b3                         | y3                          | b4              | b5      | b5          | b7                | y5                              | b7      | y5      | b7                    | y5      | b7      | y5      | b7      | y5       | b7       | y5       | b7       | y5       | b7 |
| Delta ppm               |        | 11.3    | -9.3    | -4.6             | 5.5                                             | -13.0                           | -8.7                       | -5.0                        | -4.6            |         | -11.1       |                   |                                 |         | -8.7    | -3.8                  |         |         | 1.3     |         | 0.2      |          |          |          | -2.8     |    |

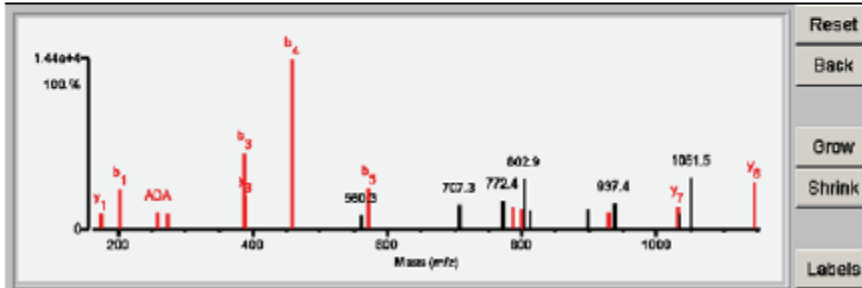



**Fig. S5.** Time course of cisplatin-induced apoptosis in Jurkat T-cells.

(A) The fraction of cells with terminal deoxynucleotide transferase dUTP nick end labeling (TUNEL) positive signal was measured. The total number of cells was established by staining with 4[prime]-6-diamidino-2-phenylindole (DAPI). The time course was measured after treatment with 200  $\mu$ M cisplatin.

(B) Western blot analysis of apoptotic markers after cisplatin (200  $\mu$ M) treatment. More than 50% of nuclear enzyme poly(ADPribose) polymerase-1 (PARP1) and procaspase-3 were cleaved after 8 h cisplatin treatment. Both are completely abolished after 16 h of treatment. The band at approximately 22 kDa is the PARP1 fragment generated after the caspase cleavage of Asp-214.

**A**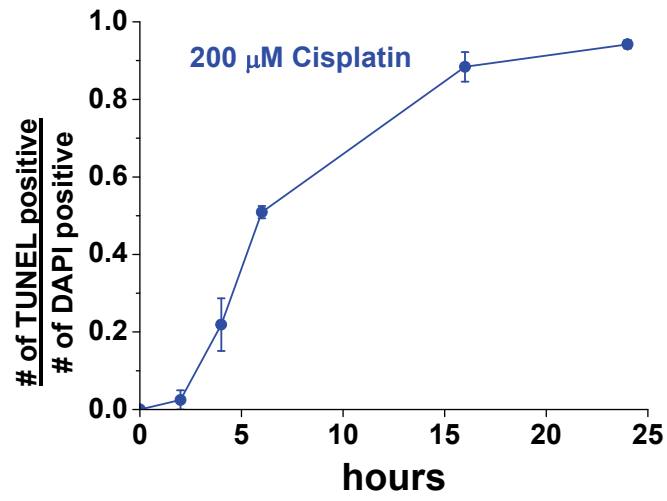**B**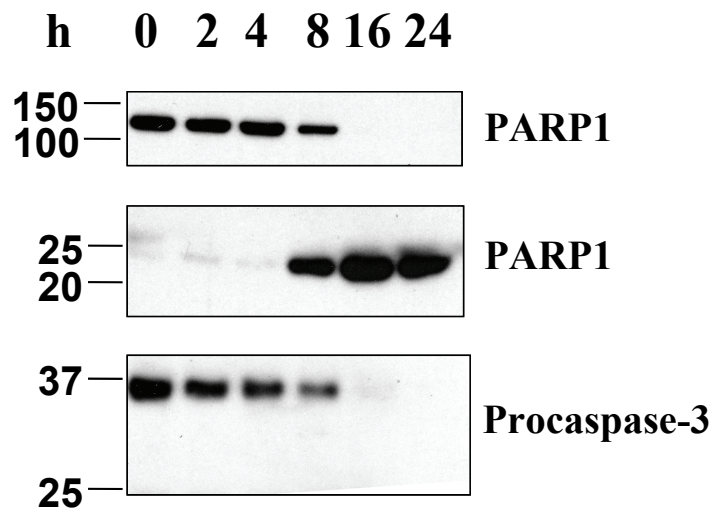
