# Supplementary material
Source: PubMed Central journal article supplement (PMC2780798)
Supplement: 0908958106_ST1_PDF.pdf [file 0908958106_ST1_PDF.pdf]

**Table S1. Peptides Derived from Protein N-terminus Identified by N-CLAP Approach**

| #  | z | Score | Fwd-Rev Score | SPI % | N-terminal Modification               | Start AA Position | Sequence Map                             | Modification | m/z Measured (Da) | MH <sup>+</sup> Matched (Da) | MH <sup>+</sup> Mass Shift (Da) | MH <sup>+</sup> Error (ppm) | Protein MW (Da) | Accession # | Protein Name                                         | Sample* |
|----|---|-------|---------------|-------|---------------------------------------|-------------------|------------------------------------------|--------------|-------------------|------------------------------|---------------------------------|-----------------------------|-----------------|-------------|------------------------------------------------------|---------|
| 1  | 2 | 19.49 | 19.49         | 90.0  | HSCH <sub>2</sub> CH <sub>2</sub> CO- | 3                 | (V)Q A W Y M D D/A PGD PR(Q)             |              | 805.3312          | 1609.641                     | 0.0141                          | 8.8                         | 21498.5         | Q9BV57      | 1,2-dihydroxy-3-keto-5-methylthiopentene dioxygenase | both    |
| 2  | 2 | 16.13 | 16.13         | 81.8  | HSCH <sub>2</sub> CH <sub>2</sub> CO- | 3                 | (P)LEN L E E E G L P K N PD L R(I)       | K:PITC       | 1044.994          | 2088.973                     | 0.0078                          | 3.8                         | 45531.6         | Q15008      | 26S proteasome non-ATPase regulatory subunit 6       | both    |
| 3  | 3 | 12.29 | 12.29         | 71.4  | HSCH <sub>2</sub> CH <sub>2</sub> CO- | 3                 | (P)GV TVKDV N Q Q E F V R(A)             | K:PITC       | 614.6296          | 1841.867                     | 0.0069                          | 3.8                         | 16060.6         | P39019      | 40S ribosomal protein S19                            | treated |
| 4  | 3 | 15.2  | 15.2          | 76.8  | HSCH <sub>2</sub> CH <sub>2</sub> CO- | 3                 | (G)H QQL Y W S H P R(K)                  |              | 480.5624          | 1439.664                     | 0.0089                          | 6.2                         | 6676.8          | P62273      | 40S ribosomal protein S29                            | vehicle |
| 5  | 2 | 16.83 | 2.59          | 93.8  | HSCH <sub>2</sub> CH <sub>2</sub> CO- | 2                 | (-)V H G S LA R(A)                       |              | 414.2123          | 827.419                      | -0.0019                         | -2.3                        | 6647.9          | P62861      | 40S ribosomal protein S30                            | both    |
| 6  | 2 | 13.50 | 13.50         | 65.1  | HSCH <sub>2</sub> CH <sub>2</sub> CO- | 2                 | (-)K F N P F V T SDR(S)                  | K:PITC       | 717.323           | 1433.634                     | 0.0047                          | 3.3                         | 17256.3         | Q9UNX3      | 60S ribosomal protein L26-like 1                     | both    |
| 7  | 2 | 21.39 | 4.29          | 98.1  | HSCH <sub>2</sub> CH <sub>2</sub> CO- | 2                 | (-)I L L E V N N R(I)                    |              | 529.7906          | 1058.566                     | 0.0076                          | 7.2                         | 34333.2         | O15144      | Actin-related protein 2/3 complex subunit 2          | both    |
| 8  | 3 | 15.11 | 15.11         | 71.4  | HSCH <sub>2</sub> CH <sub>2</sub> CO- | 3                 | (P)AYHSSLM D PDT K L I GNM A L L PI R(S) | K:PITC       | 927.1183          | 2779.344                     | -0.0035                         | -1.3                        | 20546.8         | O15145      | Actin-related protein 2/3 complex subunit 3          | both    |
| 9  | 3 | 10.18 | 10.18         | 64.1  | HSCH <sub>2</sub> CH <sub>2</sub> CO- | 3                 | (P)AHL LQDD IS SSYTTT TTL T/A PPS R(V)   |              | 888.7698          | 2664.282                     | 0.0127                          | 4.8                         | 41522.9         | O00767      | Acyl-CoA desaturase                                  | vehicle |
| 10 | 2 | 15.80 | 5.40          | 86.2  | HSCH <sub>2</sub> CH <sub>2</sub> CO- | 3                 | (P)T V E E L Y R(N)                      |              | 499.2368          | 997.466                      | 0.0004                          | 0.4                         | 57561.4         | Q9BZZ5      | Apoptosis inhibitor 5                                | both    |
| 11 | 2 | 17.35 | 10.02         | 89.0  | HSCH <sub>2</sub> CH <sub>2</sub> CO- | 3                 | (V)L A E L Y V S D R(E)                  |              | 577.2843          | 1153.556                     | 0.0055                          | 4.8                         | 62943.3         | O43776      | Asparaginyl-tRNA synthetase, cytoplasmic             | both    |
| 12 | 2 | 12.42 | 12.42         | 82.9  | HSCH <sub>2</sub> CH <sub>2</sub> CO- | 3                 | (V)P P V Q V S PLIKL GR(Y)               | K:PITC       | 813.947           | 1626.886                     | 0.0009                          | 0.5                         | 7933.2          | P56385      | ATP synthase subunit e, mitochondrial                | treated |
| 13 | 2 | 12.81 | 12.81         | 64.7  | HSCH <sub>2</sub> CH <sub>2</sub> CO- | 2                 | (-)E L S A E Y L R(E)                    |              | 534.7564          | 1068.503                     | 0.0025                          | 2.3                         | 10116.6         | Q9H3K6      | BolA-like protein 2                                  | vehicle |
| 14 | 2 | 23.72 | 23.72         | 100.0 | HSCH <sub>2</sub> CH <sub>2</sub> CO- | 2                 | (-)VGG E A A A A V E E L V S GV R(Q)     |              | 851.4279          | 1701.848                     | 0.0009                          | 0.5                         | 13196           | Q96HQ2      | CDKN2AIP N-terminal-like protein                     | both    |
| 15 | 2 | 22.45 | 22.45         | 97.8  | HSCH <sub>2</sub> CH <sub>2</sub> CO- | 3                 | (V)GGEA A A A V E E L V S GV R(Q)        |              | 801.8925          | 1602.779                     | -0.0015                         | -0.9                        | 13196           | Q96HQ2      | CDKN2AIP N-terminal-like protein                     | both    |
| 16 | 2 | 10.23 | 10.23         | 58.2  | HSCH <sub>2</sub> CH <sub>2</sub> CO- | 3                 | (A)L S A E TE S HI Y R(A)                |              | 697.3228          | 1393.642                     | -0.0033                         | -2.4                        | 23973.8         | O14569      | Cytochrome b561 domain-containing protein 2          | both    |
| 17 | 2 | 10.33 | 4.21          | 69.3  | HSCH <sub>2</sub> CH <sub>2</sub> CO- | 2                 | (-)A PE V L PK PR(M)                     | K:PITC       | 615.3123          | 1229.617                     | 0.0004                          | 0.3                         | 8781.5          | P09669      | Cytochrome c oxidase polypeptide VIc precursor       | both    |

|    |   |       |       |       |                                       |   |                                         |        |          |          |         |      |          |        |                                                                    |         |
|----|---|-------|-------|-------|---------------------------------------|---|-----------------------------------------|--------|----------|----------|---------|------|----------|--------|--------------------------------------------------------------------|---------|
| 18 | 2 | 12.15 | 5.27  | 78.2  | HSCH <sub>2</sub> CH <sub>2</sub> CO- | 3 | (A)P E V L PK PR(M)                     | K:PITC | 579.7951 | 1158.58  | 0.0031  | 2.7  | 8781.5   | P09669 | Cytochrome c oxidase polypeptide VIc precursor                     | treated |
| 19 | 2 | 23.47 | 18.17 | 100.0 | HSCH <sub>2</sub> CH <sub>2</sub> CO- | 3 | (P)F L E L D T N L P A N R(V)           |        | 745.8717 | 1490.731 | 0.0053  | 3.6  | 14195.4  | A6NHG4 | D-dopachrome decarboxylase-like protein                            | both    |
| 20 | 2 | 14.06 | 14.06 | 69.4  | HSCH <sub>2</sub> CH <sub>2</sub> CO- | 2 | (-)FV L V E M V D TV R(I)               |        | 698.3548 | 1395.701 | 0.0013  | 0.9  | 22918    | Q9Y535 | DNA-directed RNA polymerase III subunit RPC8                       | treated |
| 21 | 2 | 12.04 | 12.04 | 57.2  | HSCH <sub>2</sub> CH <sub>2</sub> CO- | 3 | (G)K D Y YQ T L G L A R(G)              | K:PITC | 775.8754 | 1550.713 | 0.0305  | 19.7 | 38044.3  | P25685 | DnaJ homolog subfamily B member 1                                  | both    |
| 22 | 2 | 11.26 | 11.26 | 61.9  | HSCH <sub>2</sub> CH <sub>2</sub> CO- | 3 | (V)DY Y E V LG V Q R(H)                 |        | 665.3156 | 1329.614 | 0.0096  | 7.2  | 36087.2  | O75190 | DnaJ homolog subfamily B member 6                                  | both    |
| 23 | 2 | 10.02 | 10.02 | 61.2  | HSCH <sub>2</sub> CH <sub>2</sub> CO- | 2 | (-)V N F T V D Q I R(A)                 |        | 590.295  | 1179.583 | 0.0001  | 0    | 95338.7  | P13639 | Elongation factor 2                                                | vehicle |
| 24 | 2 | 16.18 | 3.06  | 84.2  | HSCH <sub>2</sub> CH <sub>2</sub> CO- | 3 | (V)N F T VD Q I R(A)                    |        | 540.7636 | 1080.514 | 0.0057  | 5.2  | 95338.7  | P13639 | Elongation factor 2                                                | both    |
| 25 | 2 | 14.94 | 5.26  | 68.2  | HSCH <sub>2</sub> CH <sub>2</sub> CO- | 2 | (-)K P L L Q GHE R(S)                   | K:PITC | 707.3579 | 1413.713 | -0.0044 | -3.1 | 36502    | Q13347 | Eukaryotic translation initiation factor 3 subunit I               | both    |
| 26 | 2 | 11.16 | 11.16 | 62.0  | HSCH <sub>2</sub> CH <sub>2</sub> CO- | 3 | (P)A I M T M L A D HAA R(Q)             |        | 694.8341 | 1388.648 | 0.0126  | 9.1  | 123386.6 | O14980 | Exportin-1                                                         | both    |
| 27 | 2 | 11.34 | 2.67  | 62.9  | HSCH <sub>2</sub> CH <sub>2</sub> CO- | 3 | (P)K P I NV R(V)                        | K:PITC | 475.2422 | 949.475  | 0.0025  | 2.6  | 69413.2  | P15311 | Ezrin                                                              | treated |
| 28 | 3 | 10.70 | 10.70 | 60.1  | HSCH <sub>2</sub> CH <sub>2</sub> CO- | 3 | (A)V GN I NE L PENILLELF TH V PAR(Q)    |        | 859.4567 | 2576.354 | 0.0014  | 0.6  | 29746.9  | Q9H4M3 | F-box only protein 44                                              | both    |
| 29 | 2 | 19.64 | 19.64 | 98.4  | HSCH <sub>2</sub> CH <sub>2</sub> CO- | 3 | (G)V Q V E T I S PGD GR(T)              |        | 673.3286 | 1345.642 | 0.0083  | 6.2  | 11950.8  | P62942 | FK506-binding protein 1A                                           | both    |
| 30 | 2 | 17.34 | 17.34 | 85.2  | HSCH <sub>2</sub> CH <sub>2</sub> CO- | 4 | (V)Q V E T I S PGD G R(T)               |        | 623.7907 | 1246.573 | 0.0009  | 0.7  | 11950.8  | P62942 | FK506-binding protein 1A                                           | both    |
| 31 | 2 | 15.54 | 11.28 | 79.2  | HSCH <sub>2</sub> CH <sub>2</sub> CO- | 3 | (G)I Q G L A K L I A D V A PSA R(E)     | K:PITC | 980.0361 | 1959.055 | 0.0095  | 4.8  | 42593.2  | P39748 | Flap endonuclease 1                                                | vehicle |
| 32 | 4 | 12.19 | 12.19 | 69.9  | HSCH <sub>2</sub> CH <sub>2</sub> CO- | 3 | (P)Y Q YPALTPEQKK E L SD I AHR(I)       | K:PITC | 687.075  | 2745.262 | 0.016   | 5.8  | 39420.2  | P04075 | Fructose-bisphosphate aldolase A                                   | both    |
| 33 | 3 | 10.70 | 10.70 | 68.8  | HSCH <sub>2</sub> CH <sub>2</sub> CO- | 3 | (P)H S YPA L SAE Q KK E L S D I AL R(I) | K:PITC | 872.0858 | 2614.225 | 0.0177  | 6.8  | 39456.1  | P09972 | Fructose-bisphosphate aldolase C                                   | vehicle |
| 34 | 2 | 19.14 | 19.14 | 81.3  | HSCH <sub>2</sub> CH <sub>2</sub> CO- | 3 | (C)G I F A Y L N Y H V P R(T)           |        | 769.3835 | 1537.762 | -0.0023 | -1.5 | 78806.9  | Q06210 | Glucosamine--fructose-6-phosphate aminotransferase [isomerizing] 1 | vehicle |
| 35 | 2 | 11.84 | 11.84 | 59.7  | HSCH <sub>2</sub> CH <sub>2</sub> CO- | 2 | (-)P P Y T V V Y F PVR(G)               |        | 713.3692 | 1425.724 | 0.0076  | 5.3  | 23356    | P09211 | Glutathione S-transferase P                                        | treated |
| 36 | 2 | 17.45 | 17.45 | 95.7  | HSCH <sub>2</sub> CH <sub>2</sub> CO- | 3 | (P)P Y T V V Y F PV R(G)                |        | 664.841  | 1328.671 | 0.004   | 3    | 23356    | P09211 | Glutathione S-transferase P                                        | both    |
| 37 | 2 | 20.94 | 20.94 | 96.7  | HSCH <sub>2</sub> CH <sub>2</sub> CO- | 2 | (-)P M F I V N T N V P R(A)             |        | 688.3584 | 1375.686 | 0.0234  | 17   | 12476.4  | P14174 | Macrophage migration inhibitory factor                             | both    |

|    |   |       |       |       |                                       |   |                                         |        |           |          |         |       |         |        |                                                             |         |
|----|---|-------|-------|-------|---------------------------------------|---|-----------------------------------------|--------|-----------|----------|---------|-------|---------|--------|-------------------------------------------------------------|---------|
| 38 | 2 | 22.24 | 22.24 | 95.7  | HSCH <sub>2</sub> CH <sub>2</sub> CO- | 3 | (P)M/F I V N/T/N/V PR(A)                |        | 639.8228  | 1278.633 | 0.005   | 3.9   | 12476.4 | P14174 | Macrophage migration inhibitory factor                      | both    |
| 39 | 2 | 17.01 | 5.13  | 87.7  | HSCH <sub>2</sub> CH <sub>2</sub> CO- | 4 | (M)F I V N/T/NV P/R(A)                  |        | 574.3038  | 1147.593 | 0.0075  | 6.5   | 12476.4 | P14174 | Macrophage migration inhibitory factor                      | vehicle |
| 40 | 2 | 13.72 | 3.99  | 83.6  | HSCH <sub>2</sub> CH <sub>2</sub> CO- | 2 | (-)V N L L Q I/V/R(D)                   |        | 521.8081  | 1042.608 | 0.0012  | 1.1   | 6961.2  | O75438 | NADH dehydrogenase [ubiquinone] 1 beta subcomplex subunit 1 | vehicle |
| 41 | 2 | 11.40 | 2.32  | 71.5  | HSCH <sub>2</sub> CH <sub>2</sub> CO- | 3 | (V)N L L Q I/V/R(D)                     |        | 472.2796  | 943.539  | 0.0126  | 13.3  | 6961.2  | O75438 | NADH dehydrogenase [ubiquinone] 1 beta subcomplex subunit 1 | vehicle |
| 42 | 2 | 24.15 | 24.15 | 98.9  | HSCH <sub>2</sub> CH <sub>2</sub> CO- | 2 | (-)V/N PT V F F D I A V D G/E/PL GR(V)  |        | 1017.5043 | 2034     | 0.0012  | 0.6   | 18012.6 | P62937 | Peptidyl-prolyl cis-trans isomerase A                       | both    |
| 43 | 2 | 23.89 | 23.89 | 98.7  | HSCH <sub>2</sub> CH <sub>2</sub> CO- | 3 | (V)N/PT V F F D I A V D G/E/PL GR(V)    |        | 967.9696  | 1934.932 | 0.0002  | 0.1   | 18012.6 | P62937 | Peptidyl-prolyl cis-trans isomerase A                       | both    |
| 44 | 2 | 22.41 | 22.41 | 99.3  | HSCH <sub>2</sub> CH <sub>2</sub> CO- | 4 | (N)PT V F F D I A V D G/E/PL GR(V)      |        | 910.9378  | 1820.889 | -0.0204 | -11.2 | 18012.6 | P62937 | Peptidyl-prolyl cis-trans isomerase A                       | both    |
| 45 | 2 | 26.97 | 21.75 | 100.0 | HSCH <sub>2</sub> CH <sub>2</sub> CO- | 3 | (P)GGL L L G D V A PNF/E/A/N TT/V GR(I) |        | 1045.0237 | 2089.038 | 0.0019  | 0.9   | 25035.1 | P30041 | Peroxiredoxin-6                                             | both    |
| 46 | 2 | 15.71 | 11.03 | 72.0  | HSCH <sub>2</sub> CH <sub>2</sub> CO- | 3 | (P)G/H L Q E GF/GCV/V TN/R(F)           |        | 802.871   | 1604.731 | 0.0039  | 2.4   | 44965.6 | Q8NC51 | Plasminogen activator inhibitor 1 RNA-binding protein       | both    |
| 47 | 2 | 10.33 | 3.62  | 75.6  | HSCH <sub>2</sub> CH <sub>2</sub> CO- | 3 | (P)L P/V/A LQTR(L)                      |        | 493.2815  | 985.55   | 0.0058  | 5.9   | 30472.4 | O60828 | Polyglutamine-binding protein 1                             | both    |
| 48 | 2 | 13.39 | 8.50  | 82.1  | HSCH <sub>2</sub> CH <sub>2</sub> CO- | 3 | (P)G/P T P/S GTNV/G SSGR(S)             |        | 681.3101  | 1361.611 | 0.0015  | 1.1   | 9974.5  | P60468 | Protein transport protein Sec61 subunit beta                | vehicle |
| 49 | 2 | 14.47 | 14.47 | 71.5  | HSCH <sub>2</sub> CH <sub>2</sub> CO- | 3 | (V)M E K P/S PLL/V G/R(E)               | K:PITC | 725.3602  | 1449.705 | 0.008   | 5.5   | 52164.5 | Q13283 | Ras GTPase-activating protein-binding protein 1             | both    |
| 50 | 3 | 21.08 | 11.82 | 91.9  | HSCH <sub>2</sub> CH <sub>2</sub> CO- | 3 | (P)N I V L F/S GSS/H QD/L SQ/R(V)       |        | 625.9763  | 1875.902 | 0.0126  | 6.7   | 34769.3 | P11908 | Ribose-phosphate pyrophosphokinase 2                        | both    |
| 51 | 2 | 12.25 | 8.73  | 66.7  | HSCH <sub>2</sub> CH <sub>2</sub> CO- | 3 | (V)K L F I/G NL P/R(E)                  | K:PITC | 640.838   | 1280.664 | 0.0045  | 3.5   | 40149.8 | Q9BQ04 | RNA-binding protein 4B                                      | both    |
| 52 | 2 | 15.32 | 15.32 | 80.7  | HSCH <sub>2</sub> CH <sub>2</sub> CO- | 3 | (A)P V E H V V A D AGAF L/R(H)          |        | 784.9009  | 1568.789 | 0.0055  | 3.5   | 46675.2 | Q9ULX3 | RNA-binding protein NOB1                                    | vehicle |
| 53 | 2 | 13.43 | 13.43 | 67.9  | HSCH <sub>2</sub> CH <sub>2</sub> CO- | 4 | (P)V E H V V A D AGAF L/R(H)            |        | 736.3746  | 1471.736 | 0.0057  | 3.9   | 46675.2 | Q9ULX3 | RNA-binding protein NOB1                                    | treated |
| 54 | 2 | 16.44 | 2.53  | 94.9  | HSCH <sub>2</sub> CH <sub>2</sub> CO- | 3 | (V)L D L D L F/R(V)                     |        | 490.2506  | 979.492  | 0.0022  | 2.2   | 58777.6 | P49591 | Seryl-tRNA synthetase, cytoplasmic                          | both    |
| 55 | 2 | 19.45 | 8.31  | 92.1  | HSCH <sub>2</sub> CH <sub>2</sub> CO- | 2 | (-)L S L D F L D D V/R(R)               |        | 640.8162  | 1280.619 | 0.006   | 4.7   | 20625.4 | P67812 | Signal peptidase complex catalytic subunit SEC11A           | both    |

|    |   |       |       |       |                                       |   |                                                                        |        |           |          |         |      |          |        |                                                    |         |
|----|---|-------|-------|-------|---------------------------------------|---|------------------------------------------------------------------------|--------|-----------|----------|---------|------|----------|--------|----------------------------------------------------|---------|
| 56 | 2 | 24.47 | 14.48 | 100.0 | HSCH <sub>2</sub> CH <sub>2</sub> CO- | 2 | (-)V/L/L/E/S/E/Q/F/L/T/E/L/T/R(L)                                      |        | 883.4541  | 1765.904 | -0.0031 | -1.8 | 14570    | P37108 | Signal recognition particle 14 kDa protein         | treated |
| 57 | 2 | 24.22 | 24.22 | 100.0 | HSCH <sub>2</sub> CH <sub>2</sub> CO- | 3 | (V)L/L/E/S/E/Q/F/L/T/E/L/T/R(L)                                        |        | 833.9189  | 1666.836 | -0.0051 | -3.1 | 14570    | P37108 | Signal recognition particle 14 kDa protein         | both    |
| 58 | 2 | 19.72 | 11.04 | 89.4  | HSCH <sub>2</sub> CH <sub>2</sub> CO- | 3 | (P)Q Y Q T W E E F SR(A)                                               |        | 731.3139  | 1461.61  | 0.0102  | 7    | 10111.8  | P49458 | Signal recognition particle 9 kDa protein          | both    |
| 59 | 4 | 16.43 | 10.92 | 87.7  | HSCH <sub>2</sub> CH <sub>2</sub> CO- | 3 | (P)AGPV Q A V PPPPV PTEPKQPTTEEEASSK<br>EDSA/P/SK/PVV/GI/I/Y/PPPEVR(N) | K:PITC | 1372.9214 | 5488.64  | 0.0237  | 4.3  | 88886.6  | Q15459 | Splicing factor 3 subunit 1                        | vehicle |
| 60 | 2 | 15.62 | 5.12  | 81.9  | HSCH <sub>2</sub> CH <sub>2</sub> CO- | 2 | (-)F/L Y NL/T/L/Q/R(A)                                                 |        | 628.3305  | 1255.65  | 0.0034  | 2.7  | 135578.1 | Q15393 | Splicing factor 3B subunit 3                       | both    |
| 61 | 2 | 25.22 | 25.22 | 100.0 | HSCH <sub>2</sub> CH <sub>2</sub> CO- | 3 | (G)Q ND L M G T A E D F A D Q F L R(V)                                 |        | 1029.9505 | 2058.89  | 0.0042  | 2    | 30394.2  | O15260 | Surfeit locus protein 4                            | both    |
| 62 | 2 | 13.04 | 3.92  | 79.5  | HSCH <sub>2</sub> CH <sub>2</sub> CO- | 3 | (P)E N V A P R(S)                                                      |        | 387.1853  | 773.361  | 0.0023  | 2.9  | 57924.6  | P50991 | T-complex protein 1 subunit delta                  | treated |
| 63 | 2 | 20.17 | 20.17 | 86.9  | HSCH <sub>2</sub> CH <sub>2</sub> CO- | 3 | (A)V L A P L T A I V Y S V PR(L)                                       |        | 799.9727  | 1598.934 | 0.0043  | 2.7  | 34037.8  | Q9Y320 | Thioredoxin domain-containing protein 14 precursor | vehicle |
| 64 | 2 | 15.26 | 5.36  | 75.3  | HSCH <sub>2</sub> CH <sub>2</sub> CO- | 3 | (S)PT P PL F S L PE A R(T)                                             |        | 706.8635  | 1412.724 | -0.0045 | -3.2 | 75666.7  | Q96FV9 | THO complex subunit 1                              | vehicle |
| 65 | 2 | 19.43 | 6.42  | 95.7  | HSCH <sub>2</sub> CH <sub>2</sub> CO- | 3 | (P)V A G S E L P R(R)                                                  |        | 458.7322  | 916.456  | 0.0014  | 1.6  | 35716.2  | P04818 | Thymidylate synthase                               | both    |
| 66 | 2 | 19.71 | 11.31 | 84.6  | HSCH <sub>2</sub> CH <sub>2</sub> CO- | 2 | (-)Q L T H Q L D L F PE C R(V)                                         |        | 844.405   | 1687.793 | 0.0097  | 5.7  | 19661    | Q9Y3C4 | TP53RK-binding protein                             | vehicle |
| 67 | 2 | 12.12 | 6.79  | 71.2  | HSCH <sub>2</sub> CH <sub>2</sub> CO- | 3 | (T)V H N L Y LFD R(N)                                                  |        | 632.8132  | 1264.614 | 0.0048  | 3.8  | 16831.7  | Q9Y5R8 | Trafficking protein particle complex subunit 1     | both    |
| 68 | 3 | 16.30 | 16.30 | 51.2  | HSCH <sub>2</sub> CH <sub>2</sub> CO- | 2 | (-)K L LT H N L L S SHV R(G)                                           | K:PITC | 580.9749  | 1740.904 | 0.0065  | 3.7  | 14199.5  | Q9UI30 | TRM112-like protein                                | vehicle |
| 69 | 2 | 24.39 | 24.39 | 94.8  | HSCH <sub>2</sub> CH <sub>2</sub> CO- | 3 | (P)NSEPASL L E L F N S A T Q GE L V R(S)                               |        | 1238.628  | 2476.239 | 0.0099  | 4    | 53165.7  | P23381 | Tryptophanyl-tRNA synthetase, cytoplasmic          | both    |
| 70 | 2 | 14.02 | 6.73  | 83.1  | HSCH <sub>2</sub> CH <sub>2</sub> CO- | 3 | (P)D P A A H L PFFYGSIS R(A)                                           |        | 883.425   | 1765.837 | 0.0061  | 3.4  | 69872.7  | P43403 | Tyrosine-protein kinase ZAP-70                     | both    |
| 71 | 2 | 20.03 | 20.03 | 92.7  | HSCH <sub>2</sub> CH <sub>2</sub> CO- | 3 | (V)KLTAEL L I EQ A Q Y T N A V R(D)                                    | K:PITC | 1121.5485 | 2242.099 | -0.0098 | -4.4 | 28415.7  | P09661 | U2 small nuclear ribonucleoprotein A'              | both    |
| 72 | 2 | 11.81 | 5.40  | 78.0  | HSCH <sub>2</sub> CH <sub>2</sub> CO- | 2 | (-)I E V V C ND R(L)                                                   |        | 518.239   | 1035.46  | 0.0109  | 10.6 | 8547     | Q9BZL1 | Ubiquitin-like protein 5                           | vehicle |
| 73 | 3 | 23.98 | 14.79 | 98.7  | HSCH <sub>2</sub> CH <sub>2</sub> CO- | 2 | (-)N V DHEVN L L V E E I H R(L)                                        |        | 635.3199  | 1903.933 | 0.0121  | 6.3  | 9056.5   | Q9P1F3 | Uncharacterized protein C6orf115                   | both    |
| 74 | 3 | 11.28 | 11.28 | 59.0  | HSCH <sub>2</sub> CH <sub>2</sub> CO- | 3 | (N)VDHE V NL L V E E I H R(L)                                          |        | 597.3037  | 1789.89  | 0.0064  | 3.6  | 9056.5   | Q9P1F3 | Uncharacterized protein C6orf115                   | vehicle |
| 75 | 2 | 14.98 | 14.98 | 77.2  | HSCH <sub>2</sub> CH <sub>2</sub> CO- | 2 | (-)FV E L NN L L NT T PD R(A)                                          |        | 867.428   | 1733.853 | -0.004  | -2.3 | 29793.5  | Q0PNE2 | UPF0405 protein TMEM103                            | vehicle |
| 76 | 2 | 19.42 | 12.82 | 91.1  | HSCH <sub>2</sub> CH <sub>2</sub> CO- | 3 | (V)F E S V V V D V L N R(F)                                            |        | 682.8467  | 1364.688 | -0.0017 | -1.3 | 360278   | Q96RL7 | Vacuolar protein sorting-associated protein 13A    | vehicle |
| 77 | 2 | 18.46 | 11.19 | 95.0  | HSCH <sub>2</sub> CH <sub>2</sub> CO- | 3 | (V)L E S V V A D LL N R(F)                                             |        | 658.8478  | 1316.688 | 0.0005  | 0.3  | 422392.3 | Q709C8 | Vacuolar protein sorting-associated protein 13C    | both    |

|    |   |       |       |      |                                       |   |                           |        |          |          |        |      |         |        |                                                |         |  |
|----|---|-------|-------|------|---------------------------------------|---|---------------------------|--------|----------|----------|--------|------|---------|--------|------------------------------------------------|---------|--|
|    |   |       |       |      |                                       |   |                           |        |          |          |        |      |         |        |                                                |         |  |
| 78 | 3 | 12.52 | 12.52 | 68.2 | HSCH <sub>2</sub> CH <sub>2</sub> CO- | 2 | (-)LVILV/L/GDL/HL/PH/R(C) |        | 523.9766 | 1569.893 | 0.0219 | 13.9 | 20505.8 | Q9UBQ0 | Vacuolar protein sorting-associated protein 29 | treated |  |
| 79 | 2 | 15.64 | 2.50  | 89.8 | HSCH <sub>2</sub> CH <sub>2</sub> CO- | 3 | (V)L[L]T[M]I/A/R(V)       |        | 453.2532 | 905.495  | 0.0044 | 4.9  | 24740.7 | O75396 | Vesicle-trafficcking protein SEC22b            | both    |  |
| 80 | 2 | 10.94 | 10.94 | 56.6 | HSCH <sub>2</sub> CH <sub>2</sub> CO- | 3 | (P)P[K]V/T/S/E/L/L/R(Q)   | K:PITC | 633.3253 | 1265.638 | 0.0052 | 4.1  | 69918.2 | Q9NQW7 | Xaa-Pro aminopeptidase 1                       | treated |  |

\* The N-CLAP peptides are either detected in vehicle, cisplatin treated or both samples.
