# Supplementary material
Source: PubMed Central journal article supplement (PMC2780798)
Supplement: 0908958106_ST2_PDF.pdf [file 0908958106_ST2_PDF.pdf]

**Table S2. Peptides Derived from Proteins with Removed Signal or Transit Peptides**

| #  | z | Score | Fwd-Rev Score | SPI % | N-terminal Modification               | Start AA Position | Sequence Map                               | Modification | m/z Measured (Da) | MH <sup>+</sup> Matched (Da) | MH <sup>+</sup> Mass Shift (Da) | MH <sup>+</sup> Error (ppm) | Protein MW (Da) | Accession # | Protein Name                                                                                                                | Signal Peptide Annotated in Swiss-Prot** | 4 AAs Before Cleavage | Cleavage Site | Sample*** |
|----|---|-------|---------------|-------|---------------------------------------|-------------------|--------------------------------------------|--------------|-------------------|------------------------------|---------------------------------|-----------------------------|-----------------|-------------|-----------------------------------------------------------------------------------------------------------------------------|------------------------------------------|-----------------------|---------------|-----------|
| 1  | 2 | 11.64 | 11.64         | 56.3  | HSCH <sub>2</sub> CH <sub>2</sub> CO- | 28                | (L)SG A/PQ/A/SAADV/V/V/V/HGR(R)            |              | 854.923           | 1708.843                     | -0.0048                         | -2.8                        | 44292.3         | P09110      | 3-ketoacyl-CoA thiolase, peroxisomal precursor                                                                              | 1-26                                     | AAPC                  | 26            | treated   |
| 2  | 2 | 22.60 | 14.72         | 96.2  | HSCH <sub>2</sub> CH <sub>2</sub> CO- | 70                | (S)D M P P L T L E G I QD/R(V)             |              | 786.8759          | 1572.74                      | 0.0049                          | 3.1                         | 17417.4         | O14561      | Acyl carrier protein, mitochondrial precursor                                                                               | 1-68 (similarity)                        | CRQY                  | 68            | both      |
| 3  | 2 | 15.88 | 15.88         | 69.7  | HSCH <sub>2</sub> CH <sub>2</sub> CO- | 45                | (Q)K T GT/A/E/M/S/S L/E/E/R(I)             | K:PITC       | 887.8983          | 1774.781                     | 0.0085                          | 4.8                         | 59750.9         | P25705      | ATP synthase subunit alpha, mitochondrial precursor                                                                         | 1-43 (similarity)                        | NTHL                  | 43            | both      |
| 4  | 2 | 11.69 | 2.88          | 70.7  | HSCH <sub>2</sub> CH <sub>2</sub> CO- | 44                | (P)V P P L PEYGGKV/R(Y)                    | K:PITC       | 767.8823          | 1534.755                     | 0.0028                          | 1.8                         | 28908.8         | P24539      | ATP synthase subunit b, mitochondrial precursor                                                                             | 1-42                                     | PHLV                  | 42            | both      |
| 5  | 2 | 14.69 | 8.01          | 75.2  | HSCH <sub>2</sub> CH <sub>2</sub> CO- | 48                | (A)A Q T S PS PK/A/GA/A/TGR(I)             | K:PITC       | 811.8756          | 1622.741                     | 0.0026                          | 1.6                         | 56560.2         | P06576      | ATP synthase subunit beta, mitochondrial precursor                                                                          | 1-47 (similarity)                        | VRDY                  | 46            | both      |
| 6  | 3 | 11.56 | 11.56         | 51.2  | HSCH <sub>2</sub> CH <sub>2</sub> CO- | 25                | (F)AK L/V/R PPVQV/Y/GIE/G/R(Y)             | K:PITC       | 669.0219          | 2005.051                     | 0.0001                          | 0.1                         | 23277.4         | P48047      | ATP synthase subunit O, mitochondrial precursor                                                                             | 1-23                                     | VVRP                  | 23            | treated   |
| 7  | 3 | 10.23 | 10.23         | 59.1  | HSCH <sub>2</sub> CH <sub>2</sub> CO- | 26                | (F)GS D/Q/SE/N/V/D/RGAGSIR(E)              |              | 579.2645          | 1735.766                     | 0.0125                          | 7.2                         | 12248.9         | Q9UII2      | ATPase inhibitor, mitochondrial precursor                                                                                   | 1-25 (similarity)                        | QARG                  | 24            | vehicle   |
| 8  | 3 | 16.73 | 16.73         | 75.7  | HSCH <sub>2</sub> CH <sub>2</sub> CO- | 27                | (G)S D/Q/S/E/N/V/D/RGA/GSI/R(E)            |              | 560.2573          | 1678.745                     | 0.0124                          | 7.4                         | 12248.9         | Q9UII2      | ATPase inhibitor, mitochondrial precursor                                                                                   | 1-25 (similarity)                        | ARGF                  | 25            | both      |
| 9  | 3 | 13.22 | 7.05          | 68.9  | HSCH <sub>2</sub> CH <sub>2</sub> CO- | 28                | (S)D Q/S/E/N/V/D/RGAGSIR(E)                |              | 531.2425          | 1591.713                     | 0                               | 0                           | 12248.9         | Q9UII2      | ATPase inhibitor, mitochondrial precursor                                                                                   | 1-25 (similarity)                        | RGFG                  | 26            | treated   |
| 10 | 3 | 20.04 | 20.04         | 94.1  | HSCH <sub>2</sub> CH <sub>2</sub> CO- | 36                | (T)AT F A QA L QFV/PETQ/V/S/L/L/D/NGL/R(V) |              | 869.4581          | 2606.328                     | 0.0314                          | 12.1                        | 52646.1         | P31930      | Cytochrome b-c1 complex subunit 1, mitochondrial precursor                                                                  | 1-34                                     | ALRS                  | 34            | both      |
| 11 | 2 | 23.94 | 23.94         | 98.4  | HSCH <sub>2</sub> CH <sub>2</sub> CO- | 15                | (G)D PEEE E E E E E L V D PL/T/T/V/R(E)    |              | 1238.0355         | 2475.06                      | 0.0034                          | 1.4                         | 10738.8         | P07919      | Cytochrome b-c1 complex subunit 6, mitochondrial precursor                                                                  | 1-13                                     | LTES                  | 13            | both      |
| 12 | 3 | 18.24 | 14.34         | 87.6  | HSCH <sub>2</sub> CH <sub>2</sub> CO- | 24                | (A)H E S V V K SEDF/S/L/P/A/YMD/R(R)       | K:PITC       | 778.3432          | 2333.003                     | 0.0115                          | 4.9                         | 19576.8         | P13073      | Cytochrome c oxidase subunit 4 isoform 1, mitochondrial precursor                                                           | 1-22                                     | VCVR                  | 22            | both      |
| 13 | 2 | 15.29 | 15.29         | 77.9  | HSCH <sub>2</sub> CH <sub>2</sub> CO- | 43                | (S)H G SQ E T D E E FD AR(W)               |              | 804.8168          | 1608.623                     | 0.0032                          | 2                           | 16774.3         | P20674      | Cytochrome c oxidase subunit 5A, mitochondrial precursor                                                                    | 1-41                                     | VRCY                  | 41            | both      |
| 14 | 2 | 22.04 | 15.26         | 96.2  | HSCH <sub>2</sub> CH <sub>2</sub> CO- | 33                | (A)SGG G V P TD E E Q A T GL E R(E)        |              | 895.8989          | 1790.786                     | 0.0044                          | 2.5                         | 13695.8         | P10606      | Cytochrome c oxidase subunit 5B, mitochondrial precursor                                                                    | 1-31                                     | MRSM                  | 31            | both      |
| 15 | 3 | 15.38 | 15.38         | 73.9  | HSCH <sub>2</sub> CH <sub>2</sub> CO- | 86                | (S)DL ELH PPS Y P W SH/R(G)                |              | 607.9597          | 1821.838                     | 0.0268                          | 14.7                        | 35390.1         | P08574      | Cytochrome c1, heme protein, mitochondrial precursor                                                                        | 1-84                                     | AVSA                  | 84            | vehicle   |
| 16 | 2 | 14.85 | 6.35          | 80.0  | HSCH <sub>2</sub> CH <sub>2</sub> CO- | 69                | (D)DL V T V K T PAF/A/ESV/TE/GDVR(W)       | K:PITC       | 1179.0588         | 2357.115                     | -0.0049                         | -2.1                        | 48640.5         | P36957      | Dihydropyridyllysine-residue succinyltransferase component of 2-oxoglutarate dehydrogenase complex, mitochondrial precursor | 1-67 (similarity)                        | AVCK                  | 67            | treated   |
| 17 | 2 | 14.41 | 14.41         | 78.3  | HSCH <sub>2</sub> CH <sub>2</sub> CO- | 23                | (D)D E V D V DGT V E E DL GK/S/R(E)        | K:PITC       | 1043.4306         | 2085.874                     | -0.02                           | -9.6                        | 92469.3         | P14625      | Endoplasmic precursor                                                                                                       | 1-21                                     | SVRA                  | 21            | treated   |
| 18 | 2 | 22.62 | 9.95          | 96.7  | HSCH <sub>2</sub> CH <sub>2</sub> CO- | 25                | (E)E QP P E T/A/A Q/R(C)                   |              | 607.7791          | 1214.547                     | 0.0039                          | 3.2                         | 54393           | Q96HE7      | ERO1-like protein alpha precursor                                                                                           | 1-23                                     | SGHG                  | 23            | both      |
| 19 | 2 | 12.34 | 2.33          | 83.4  | HSCH <sub>2</sub> CH <sub>2</sub> CO- | 29                | (R)E V L V PE GPLY/R(V)                    |              | 680.3482          | 1359.698                     | -0.0086                         | -6.3                        | 65034.6         | Q969P0      | Immunoglobulin superfamily member 8 precursor                                                                               | 1-27 (potential)                         | GCWA                  | 27            | both      |

|    |   |         |       |       |                                       |    |                                    |        |           |          |         |      |         |        |                                                                                      |                   |      |    |         |
|----|---|---------|-------|-------|---------------------------------------|----|------------------------------------|--------|-----------|----------|---------|------|---------|--------|--------------------------------------------------------------------------------------|-------------------|------|----|---------|
| 20 | 2 | 19.64   | 4.58  | 95.8  | HSCH <sub>2</sub> CH <sub>2</sub> CO- | 26 | (K)V F E V H V R(P)                |        | 487.2515  | 973.492  | 0.0033  | 3.4  | 30654.5 | P13598 | Intercellular adhesion molecule 2 precursor                                          | 1-24 (predicted)* | GSDE | 24 | both    |
| 21 | 2 | 18.86   | 18.86 | 90.9  | HSCH <sub>2</sub> CH <sub>2</sub> CO- | 45 | (S)TQ A T Q V V L N V PE T R(V)    |        | 857.9441  | 1714.879 | 0.0017  | 1    | 54366.5 | O75439 | Mitochondrial-processing peptidase subunit beta, mitochondrial precursor             | 1-45 (potential)  | NRLR | 43 | vehicle |
| 22 | 2 | 12.57   | 12.57 | 74.3  | HSCH <sub>2</sub> CH <sub>2</sub> CO- | 35 | (A)G GG V H I E P R(Y)             |        | 505.2492  | 1009.488 | 0.0027  | 2.7  | 12058.5 | O95178 | NADH dehydrogenase [ubiquinone] 1 beta subcomplex subunit 2, mitochondrial precursor | 1-33 (similarity) | GVRH | 33 | vehicle |
| 23 | 2 | 23.92   | 14.32 | 100.0 | HSCH <sub>2</sub> CH <sub>2</sub> CO- | 34 | (G)A G G A L F V H R(D)            |        | 508.2618  | 1015.514 | 0.0021  | 2.1  | 27391.7 | P19404 | NADH dehydrogenase [ubiquinone] flavoprotein 2, mitochondrial precursor              | 1-32              | VMQN | 32 | both    |
| 24 | 3 | 9.43*** | 9.43  | 62.4  | HSCH <sub>2</sub> CH <sub>2</sub> CO- | 38 | (E)S A G AD TRPTV VRPR(N)          |        | 491.2547  | 1471.743 | 0.0061  | 4.2  | 30241.7 | O75489 | NADH dehydrogenase [ubiquinone] iron-sulfur protein 3, mitochondrial precursor       | 1-36 (similarity) | PVRR | 36 | treated |
| 25 | 2 | 13.19   | 6     | 77.5  | HSCH <sub>2</sub> CH <sub>2</sub> CO- | 39 | (W)E T E E R P R(T)                |        | 502.7278  | 1004.447 | 0.0018  | 1.7  | 30540.1 | Q13162 | Peroxisome oxidoreductin-4                                                           | 1-37 (predicted)* | AVQG | 37 | treated |
| 26 | 3 | 12.03   | 12.03 | 71.3  | HSCH <sub>2</sub> CH <sub>2</sub> CO- | 23 | (L)R PGDCE V C I S YL G R(F)       |        | 552.5879  | 1655.734 | 0.0153  | 9.2  | 20256.7 | P55145 | Protein ARMET precursor                                                              | 1-21              | GSRA | 21 | vehicle |
| 27 | 2 | 23.72   | 20.54 | 100.0 | HSCH <sub>2</sub> CH <sub>2</sub> CO- | 26 | (S)DV L E L T D D N F E S R(I)     |        | 820.8607  | 1640.711 | 0.0033  | 2    | 56782.7 | P30101 | Protein disulfide-isomerase A3 precursor                                             | 1-24              | LAAA | 24 | both    |
| 28 | 2 | 18.02   | 18.02 | 94.8  | HSCH <sub>2</sub> CH <sub>2</sub> CO- | 21 | (L)YSSDD V I E L T P SNFN R(E)     |        | 1016.4674 | 2031.896 | 0.0311  | 15.3 | 48121.6 | Q15084 | Protein disulfide-isomerase A6 precursor                                             | 1-19 (potential)  | AVNG | 19 | both    |
| 29 | 2 | 26.66   | 16.1  | 98.1  | HSCH <sub>2</sub> CH <sub>2</sub> CO- | 19 | (D)A P E E E D H V L V L R(K)      |        | 747.8721  | 1494.726 | 0.0112  | 7.5  | 57116.6 | P07237 | Protein disulfide-isomerase precursor                                                | 1-17              | LVRA | 17 | both    |
| 30 | 2 | 22.30   | 14.24 | 98.3  | HSCH <sub>2</sub> CH <sub>2</sub> CO- | 32 | (D)GV G GD P A V A L PH R(R)       |        | 667.3379  | 1333.668 | 0.0004  | 0.3  | 57549.2 | P49257 | Protein ERGIC-53 precursor                                                           | 1-30              | FVRG | 30 | treated |
| 31 | 2 | 22.36   | 10.74 | 97.6  | HSCH <sub>2</sub> CH <sub>2</sub> CO- | 58 | (P)L I P I V V E Q T G R(G)        |        | 656.8659  | 1312.729 | -0.0048 | -3.7 | 30180.2 | Q16740 | Putative ATP-dependent Clp protease proteolytic subunit, mitochondrial precursor     | 1-? (potential)   | TRAL | 56 | both    |
| 32 | 2 | 17.12   | 17.12 | 91.4  | HSCH <sub>2</sub> CH <sub>2</sub> CO- | 18 | (E)SE T T S L V L E R(S)           |        | 662.3325  | 1323.646 | 0.0117  | 8.8  | 17259.8 | Q04837 | Single-stranded DNA-binding protein, mitochondrial precursor                         | 1-16 (similarity) | FVRH | 16 | both    |
| 33 | 2 | 13.11   | 13.11 | 69.8  | HSCH <sub>2</sub> CH <sub>2</sub> CO- | 30 | (A)Q T A A A T A P R(I)            |        | 487.7408  | 974.472  | 0.0019  | 2    | 31629.9 | P21912 | Succinate dehydrogenase [ubiquinone] iron-sulfur subunit, mitochondrial precursor    | 1-28              | ASRG | 28 | treated |
| 34 | 2 | 15.11   | 4.06  | 79.0  | HSCH <sub>2</sub> CH <sub>2</sub> CO- | 23 | (F)K I P I EE LED R(V)             | K:PITC | 732.8484  | 1464.686 | 0.0034  | 2.3  | 18929.7 | P04234 | T-cell surface glycoprotein CD3 delta chain precursor                                | 1-21              | QVSP | 21 | both    |
| 35 | 2 | 20.76   | 13.57 | 97.7  | HSCH <sub>2</sub> CH <sub>2</sub> CO- | 61 | (T)TF N I Q D G PDF Q D R(V)       |        | 820.8636  | 1640.701 | 0.019   | 11.6 | 18383.4 | Q99757 | Thioredoxin, mitochondrial precursor                                                 | 1-59 (similarity) | RISL | 59 | both    |
| 36 | 2 | 14.67   | 9.57  | 78.7  | HSCH <sub>2</sub> CH <sub>2</sub> CO- | 25 | (A)G P P P I Q DGE FTF L L PAGR(K) |        | 1000.5047 | 1999.995 | 0.0075  | 3.8  | 25205.9 | Q13445 | Transmembrane emp24 domain-containing protein 1 precursor                            | 1-23 (potential)  | EVGG | 23 | treated |
| 37 | 2 | 11.84   | 6.21  | 74.6  | HSCH <sub>2</sub> CH <sub>2</sub> CO- | 33 | (I)SF H L PINS R(K)                |        | 579.7898  | 1158.572 | -0.0001 | -0.1 | 24976.1 | P49755 | Transmembrane emp24 domain-containing protein 10 precursor                           | 1-31 (potential)  | LVLA | 31 | both    |
| 38 | 2 | 19.63   | 19.63 | 88.0  | HSCH <sub>2</sub> CH <sub>2</sub> CO- | 33 | (V)SE P T T V A F D V R(P)         |        | 655.3098  | 1309.609 | 0.003   | 2.3  | 18795.3 | Q969H8 | UPF0556 protein C19orf10 precursor                                                   | 1-31 (potential)  | PAEA | 31 | both    |

\*The signal peptides are predicted by SignalP 3.0 (Emanuelsson O, Brunak S, von Heijne G, & Nielsen H (2007) Locating proteins in the cell using TargetP, SignalP and related tools. *Nat Protoc* 2:953-971.)

\*\* The term 'potential' and 'similarity' are qualifiers used in the Swiss-Prot database for the annotation describing information that is not based on experimental findings. 'Potential' indicates that there is some logical or conclusive evidence that the given annotation could apply. This non-experimental qualifier is often used to present results from protein sequence analysis software tools, which are only annotated if the result makes sense in the biological context of a given protein. When an biological information was experimentally obtained for a given protein (or part of it), it may be transferred to other protein family members within a certain taxonomic range, dependent on the biological event or characteristic. The propagated information is tagged with the term 'similarity'.

\*\*\* The N-CLAP peptides are either detected in vehicle, cisplatin treated or both samples.

\*\*\*\* This N-CLAP peptide has a lower score, which is also included in the list because this peptide is derived from the removal of the transit peptide annotated in Swiss-Prot database.
