# Supplementary material
Source: PubMed Central journal article supplement (PMC2780798)
Supplement: 0908958106_ST3_PDF.pdf [file 0908958106_ST3_PDF.pdf]

**Table S3. Peptides Derived from Caspase Cleavage Sites Identified by N-CLAP Approach after Drug Treatment of Jurkat T-Cells**

| #  | z | Score | Fwd-Rev Score | SPI % | N-terminal Modification               | Start AA Position | Sequence Map                                  | Modification | m/z Measured (Da) | MH <sup>+</sup> Matched (Da) | MH <sup>+</sup> Mass Shift (Da) | MH <sup>+</sup> Error (ppm) | Protein MW (Da) | Accession # | Protein Name                                                                      | 4 AAs Before Cleavage Sites | Cleavage Site | Sample  | Refs. Reported | Site Report (Y/N) |
|----|---|-------|---------------|-------|---------------------------------------|-------------------|-----------------------------------------------|--------------|-------------------|------------------------------|---------------------------------|-----------------------------|-----------------|-------------|-----------------------------------------------------------------------------------|-----------------------------|---------------|---------|----------------|-------------------|
| 1  | 3 | 15.47 | 15.47         | 64.8  | HSCH <sub>2</sub> CH <sub>2</sub> CO- | 159               | (G)VTHTV PI YEG Y/A/L/P/HAIL/R(L)             |              | 746.7372          | 2238.174                     | 0.0231                          | 10.3                        | 41737           | P60709      | Actin, cytoplasmic 1                                                              | DSGD                        | 157           | treated | 1              | N                 |
| 2  | 2 | 9.89  | 5.6           | 66.6  | HSCH <sub>2</sub> CH <sub>2</sub> CO- | 266               | (M)SK/P/DL/T/A/ALR(D)                         | K:PITC       | 647.818           | 1294.628                     | 0.0005                          | 0.4                         | 53536           | P17661      | Desmin *                                                                          | VEMD                        | 264           | treated | 2              | Y                 |
| 3  | 2 | 13.96 | 13.96         | 78.9  | HSCH <sub>2</sub> CH <sub>2</sub> CO- | 8                 | (F)L/GQSDSGG S EE V V L/T/PAE/L/IE/R(L)       |              | 1201.5707         | 2402.139                     | -0.005                          | -2.1                        | 26047           | Q9BRT9      | DNA replication complex GINS protein SLD5                                         | EEVD                        | 6             | treated | N/A            | N                 |
| 4  | 2 | 12.69 | 12.69         | 61.2  | HSCH <sub>2</sub> CH <sub>2</sub> CO- | 95                | (S)LKE A L T Y D G AL/L/GDR(S)                | K:PITC       | 929.4416          | 1857.887                     | -0.0114                         | -6.2                        | 27385.2         | Q15056      | Eukaryotic translation initiation factor 4H                                       | DEVD                        | 93            | treated | 3              | Y                 |
| 5  | 2 | 12.78 | -0.16         | 71.1  | HSCH <sub>2</sub> CH <sub>2</sub> CO- | 137               | (L)S/P/P/PQ/AA/R(R)                           |              | 456.2223          | 911.44                       | -0.003                          | -3.3                        | 23410.1         | P63118      | HERV-H_3q26 provirus ancestral Gag polyprotein **                                 | DPSD                        | 135           | treated | N/A            | N                 |
| 6  | 3 | 18.72 | 18.72         | 65.7  | HSCH <sub>2</sub> CH <sub>2</sub> CO- | 1003              | (G)ASA E T E PWA A A V PPEWV PII QQDIQ/SQR(K) |              | 1069.1866         | 3205.562                     | -0.017                          | -5.3                        | 119409.3        | P46379      | Large proline-rich protein BAT3                                                   | DEQD                        | 1001          | treated | 4              | Y                 |
| 7  | 2 | 14.28 | 6.81          | 79.4  | HSCH <sub>2</sub> CH <sub>2</sub> CO- | 1162              | (T)T/A A/Q/Q/E/L/R(T)                         |              | 502.7451          | 1004.483                     | 0                               | 0                           | 228940.2        | P35580      | Myosin-10 ***                                                                     | DTLD                        | 1160          | treated | N/A            | N                 |
| 8  | 2 | 23.97 | 14.28         | 94.8  | HSCH <sub>2</sub> CH <sub>2</sub> CO- | 59                | (G)LV E T P T G/Y I/E/S/L/PR(V)               |              | 831.9247          | 1662.841                     | 0.0014                          | 0.8                         | 45374.4         | P55209      | Nucleosome assembly protein 1-like 1                                              | ERLD                        | 57            | treated | 3, 5           | Y                 |
| 9  | 2 | 19.34 | 10.84         | 89.1  | HSCH <sub>2</sub> CH <sub>2</sub> CO- | 520               | (D)II V N W V N/E/T/L/R(E)                    |              | 722.8809          | 1444.762                     | -0.0072                         | -5                          | 70289.7         | P13796      | Plastin-2                                                                         | KVND                        | 518           | treated | N/A            | N                 |
| 10 | 2 | 15.01 | 7.43          | 81.5  | HSCH <sub>2</sub> CH <sub>2</sub> CO- | 16                | (A)L P Y F D QGY E/A PGVR(E)                  |              | 850.3974          | 1699.778                     | 0.0091                          | 5.3                         | 26131.6         | O75934      | Pre-mRNA-splicing factor SPF27                                                    | VVVD                        | 14            | treated | N/A            | N                 |
| 11 | 3 | 17.41 | 17.41         | 78.9  | HSCH <sub>2</sub> CH <sub>2</sub> CO- | 195               | (N)GDV C QDC I Q M V T D I Q T/A VR(T)        |              | 728.3306          | 2182.96                      | 0.0173                          | 7.9                         | 58113.1         | P07602      | Proactivator polypeptide precursor                                                | QPKD                        | 193           | both    | N/A            | N                 |
| 12 | 3 | 15.19 | 15.19         | 79.1  | HSCH <sub>2</sub> CH <sub>2</sub> CO- | 140               | (N)EE A A LLHEEAT M T I E E/L/L/T/R(Y)        |              | 796.3898          | 2387.147                     | 0.008                           | 3.3                         | 59271.9         | O15355      | Protein phosphatase 1G                                                            | DEDD                        | 138           | treated | N/A            | N                 |
| 13 | 2 | 20.63 | 20.63         | 98.8  | HSCH <sub>2</sub> CH <sub>2</sub> CO- | 586               | (A)A E L V E T I A/A/T/A/R(E)                 |              | 666.8489          | 1332.683                     | 0.0077                          | 5.8                         | 86707.4         | Q6P996      | Pyridoxal-dependent decarboxylase domain-containing protein 1                     | DNVD                        | 584           | treated | N/A            | N                 |
| 14 | 2 | 19.13 | 19.13         | 91.2  | HSCH <sub>2</sub> CH <sub>2</sub> CO- | 7                 | (G)DD S L Y PI A VL I D E LR(N)               |              | 910.4593          | 1819.915                     | -0.0033                         | -1.8                        | 65309           | P30153      | Serine/threonine-protein phosphatase 2A 65 kDa regulatory subunit A alpha isoform | AAAD                        | 5             | treated | 6              | N                 |
| 15 | 3 | 20.87 | 20.87         | 94.7  | HSCH <sub>2</sub> CH <sub>2</sub> CO- | 130               | (G)L A V T PT PV P V V GSQMT/R(Q)             |              | 614.3298          | 1840.966                     | 0.0089                          | 4.8                         | 53501.3         | P26368      | Splicing factor U2AF 65 kDa subunit                                               | MTPD                        | 128           | treated | 3              | Y                 |
| 16 | 2 | 19.26 | 10.08         | 81.0  | HSCH <sub>2</sub> CH <sub>2</sub> CO- | 219               | (S)I E A N V E S SEV HV E/R(A)                |              | 843.393           | 1685.78                      | -0.0012                         | -0.7                        | 31642.1         | Q86Y82      | Syntaxin-12                                                                       | DLID                        | 217           | treated | 3              | Y                 |
| 17 | 3 | 23.97 | 13.63         | 100.0 | HSCH <sub>2</sub> CH <sub>2</sub> CO- | 206               | (S)I E A N V E N/A/E/V HVQQANQQLSR(A)         |              | 822.4052          | 2465.184                     | 0.0173                          | 7                           | 29815.7         | O15400      | Syntaxin-7                                                                        | DVID                        | 204           | treated | 7              | Y                 |
| 18 | 2 | 15.32 | 6.81          | 85.6  | HSCH <sub>2</sub> CH <sub>2</sub> CO- | 154               | (A)GL D A L S S I S/R(Q)                      |              | 610.3203          | 1219.635                     | -0.0018                         | -1.5                        | 26906.8         | Q9UNK0      | Syntaxin-8                                                                        | QEQD                        | 152           | treated | 8              | N                 |
| 19 | 2 | 19.45 | 19.45         | 90.6  | HSCH <sub>2</sub> CH <sub>2</sub> CO- | 8                 | (Q)Q Q T T N T V E E PL D LI/R(L)             |              | 922.9606          | 1844.906                     | 0.0081                          | 4.4                         | 11845.5         | P62310      | U6 snRNA-associated Sm-like protein LSm3                                          | DDVD                        | 6             | treated | 3              | Y                 |
| 20 | 2 | 10.63 | 5.2           | 71.5  | HSCH <sub>2</sub> CH <sub>2</sub> CO- | 54                | (A)SS T VP SLCTEAR(A)                         |              | 669.8173          | 1338.603                     | 0.0245                          | 18.3                        | 14269.2         | Q96NJ1      | Uncharacterized protein FLJ30774                                                  | GFPD                        | 52            | treated | N/A            | N                 |
| 21 | 2 | 18.70 | 18.7          | 93.1  | HSCH <sub>2</sub> CH <sub>2</sub> CO- | 159               | (Q)IG SE I I E E L G/E Q/R(D)                 |              | 780.8819          | 1560.757                     | -0.0009                         | -0.6                        | 26688.6         | Q9UEU0      | Vesicle transport                                                                 | TETD                        | 157           | treated | N/A            | N                 |
