# Supplementary material
Source: PubMed Central journal article supplement (PMC2780798)
Supplement: 0908958106_ST4_PDF.pdf [file 0908958106_ST4_PDF.pdf]

**Table S4. Peptides Derived from Protein Internal Cleavages Identified by N-CLAP Approach in Jurkat T-Cells**

| #  | z | Score | Fwd-Rev Score | SPI % | N-terminal Modification               | Start AA Position | Sequence Map                                                                            | Modification | m/z Measured (Da) | MH <sup>+</sup> Matched (Da) | MH <sup>+</sup> Mass Shift (Da) | MH <sup>+</sup> Error (ppm) | Protein MW (Da) | Accession # | Protein Name                                       | 4 AAs Before Cleavage | Cleavage Site | Sample  | Refs. Reported | Site Report (Y/N) |
|----|---|-------|---------------|-------|---------------------------------------|-------------------|-----------------------------------------------------------------------------------------|--------------|-------------------|------------------------------|---------------------------------|-----------------------------|-----------------|-------------|----------------------------------------------------|-----------------------|---------------|---------|----------------|-------------------|
| 1  | 2 | 13.07 | 8.82          | 62.9  | HSCH <sub>2</sub> CH <sub>2</sub> CO- | 8                 | (R)K F L P L FD R(V)                                                                    | K:PITC       | 629.8192          | 1258.611                     | 0.02                            | 15.9                        | 10931.7         | P61604      | 10 kDa heat shock protein, mitochondrial           | GQAF                  | 6             | treated | 1, 2           | N                 |
| 2  | 2 | 13.46 | 4.59          | 76.8  | HSCH <sub>2</sub> CH <sub>2</sub> CO- | 127               | (C)N G Y L QSR(Y)                                                                       |              | 463.2093          | 925.42                       | -0.0083                         | -9                          | 29458.7         | P18405      | 3-oxo-5-alpha-steroid 4-dehydrogenase 1            | MFCT                  | 125           | both    | N              | N                 |
| 3  | 2 | 19.22 | 19.22         | 91.1  | HSCH <sub>2</sub> CH <sub>2</sub> CO- | 42                | (L)Q G V D L L A D A V A V T M G PK G R(T)                                              | K:PITC       | 1061.0093         | 2121.029                     | -0.0176                         | -8.3                        | 61055           | P10809      | 60 kDa heat shock protein, mitochondrial precursor | RALM                  | 40            | both    | 1              | N                 |
| 4  | 2 | 11.21 | 11.21         | 75.6  | HSCH <sub>2</sub> CH <sub>2</sub> CO- | 146               | (K)L A T Q L T G PVM PVR(N)                                                             |              | 735.8974          | 1470.781                     | 0.0068                          | 4.6                         | 24261.6         | P26373      | 60S ribosomal protein L13                          | AEEL                  | 144           | vehicle | N              | N                 |
| 5  | 2 | 19.22 | 7.34          | 82.9  | HSCH <sub>2</sub> CH <sub>2</sub> CO- | 167               | (R)I A L T D N A L I A R(S)                                                             |              | 629.8475          | 1258.682                     | 0.0053                          | 4.2                         | 29225.9         | P18124      | 60S ribosomal protein L7                           | INKK                  | 165           | treated | N              | N                 |
| 6  | 2 | 18.31 | 9.65          | 86.1  | HSCH <sub>2</sub> CH <sub>2</sub> CO- | 168               | (I)A L T D N A L I A R(S)                                                               |              | 573.2995          | 1145.598                     | -0.0066                         | -5.8                        | 29225.9         | P18124      | 60S ribosomal protein L7                           | NKKR                  | 166           | treated | N              | N                 |
| 7  | 3 | 10.27 | 10.27         | 60.2  | HSCH <sub>2</sub> CH <sub>2</sub> CO- | 206               | (T)Q V N S E D K G A L L V E A I R(T)                                                   | K:PITC       | 767.0396          | 2299.103                     | 0.0011                          | 0.5                         | 29995.8         | P62424      | 60S ribosomal protein L7a                          | TVAF                  | 204           | treated | N              | N                 |
| 8  | 2 | 12.57 | 12.57         | 78.8  | HSCH <sub>2</sub> CH <sub>2</sub> CO- | 300               | (N)V L S G G T T M Y P G I A R(M)                                                       |              | 813.401           | 1625.766                     | 0.0285                          | 17.6                        | 42009.2         | P62736      | Actin, aortic smooth muscle                        | LYAN                  | 298           | vehicle | 1              | N                 |
| 9  | 3 | 10.63 | 10.63         | 67.5  | HSCH <sub>2</sub> CH <sub>2</sub> CO- | 161               | (T)H T V P I Y E G Y A L P H A I R(L)                                                   |              | 680.0301          | 2038.058                     | 0.0179                          | 8.8                         | 41737           | P60709      | Actin, cytoplasmic 1                               | G D G V               | 159           | vehicle | 1, 2, 3        | N                 |
| 10 | 2 | 14.68 | 11.5          | 79.9  | HSCH <sub>2</sub> CH <sub>2</sub> CO- | 295               | (Y)A N T V L S G G T T M Y P G I A R(M)                                                 |              | 956.4683          | 1911.894                     | 0.0354                          | 18.5                        | 41737           | P60709      | Actin, cytoplasmic 1                               | R K D L               | 293           | vehicle | 1, 2, 3        | N                 |
| 11 | 4 | 19.29 | 10.35         | 78.6  | HSCH <sub>2</sub> CH <sub>2</sub> CO- | 102               | (R)Y S P H L L A N S K V E P I P W N Q A E G D L T P D E V V A L V G Q G L Q E G E R(D) | K:PITC       | 1170.5741         | 4679.255                     | 0.0201                          | 4.3                         | 40764.7         | P00813      | Adenosine deaminase                                | Y V E V               | 100           | vehicle | 1, 2           | N                 |
| 12 | 2 | 15.15 | 15.15         | 69.5  | HSCH <sub>2</sub> CH <sub>2</sub> CO- | 5                 | (S)V P A A E P E Y P K G I R(A)                                                         | K:PITC       | 825.3979          | 1649.781                     | 0.0071                          | 4.3                         | 26477.9         | P54819      | Adenylate kinase isoenzyme 2, mitochondrial        | (-)M A P              | 3             | treated | 1              | Y                 |
| 13 | 2 | 17.10 | 6.88          | 84.8  | HSCH <sub>2</sub> CH <sub>2</sub> CO- | 366               | (W)G V M V S H R(S)                                                                     |              | 437.2086          | 873.407                      | 0.003                           | 3.4                         | 47169.2         | P06733      | Alpha-enolase                                      | Q A N G               | 364           | treated | 1, 2           | N                 |
| 14 | 2 | 13.74 | 5.38          | 78.8  | HSCH <sub>2</sub> CH <sub>2</sub> CO- | 729               | (R)A V F P S I V G R(P)                                                                 |              | 517.2773          | 1033.55                      | -0.0026                         | -2.5                        | 121364.2        | Q6S8J3      | ANKRD26-like family C member 1A                    | D D A P               | 727           | both    | 1              | N                 |
| 15 | 3 | 10.06 | 10.06         | 52.8  | HSCH <sub>2</sub> CH <sub>2</sub> CO- | 787               | (W)H H T F Y N E L R(V)                                                                 |              | 435.5338          | 1304.584                     | 0.0028                          | 2.1                         | 121364.2        | Q6S8J3      | ANKRD26-like family C member 1A                    | M E K I               | 785           | treated | 1              | N                 |
| 16 | 2 | 19.49 | 13.86         | 91.9  | HSCH <sub>2</sub> CH <sub>2</sub> CO- | 940               | (S)Y E L P D G Q V I T I G N E R(F)                                                     |              | 896.4328          | 1791.858                     | 0.0001                          | 0.1                         | 121364.2        | Q6S8J3      | ANKRD26-like family C member 1A                    | S L E K               | 938           | treated | 1              | N                 |
| 17 | 4 | 11.76 | 11.76         | 65.9  | HSCH <sub>2</sub> CH <sub>2</sub> CO- | 500               | (R)I L S L A T G H R E E G G E N L D Q A R(E)                                           |              | 592.5515          | 2367.172                     | 0.012                           | 5.1                         | 75873.7         | P08133      | Annexin A6                                         | G H F R               | 498           | vehicle | N              | N                 |
| 18 | 2 | 21.31 | 11.11         | 96.7  | HSCH <sub>2</sub> CH <sub>2</sub> CO- | 164               | (I)V P I Y E G Y A L P H A I R(L)                                                       |              | 900.4855          | 1799.951                     | 0.0124                          | 6.9                         | 42003.4         | Q562R1      | Beta-actin-like protein 2                          | G V T H               | 162           | both    | N              | N                 |
| 19 | 3 | 10.27 | 3.92          | 61.7  | HSCH <sub>2</sub> CH <sub>2</sub> CO- | 169               | (R)D V F H T T V N F I N Q N L R(T)                                                     |              | 635.9855          | 1905.928                     | 0.0144                          | 7.5                         | 21994.8         | P55957      | BH3-interacting domain death agonist               | P S L L               | 167           | vehicle | N              | N                 |
| 20 | 3 | 15.21 | 15.21         | 78.5  | HSCH <sub>2</sub> CH <sub>2</sub> CO- | 62                | (I)L G G V I S A I S E A A A Q Y N P E P P P R(T)                                       |              | 808.0752          | 2422.207                     | 0.0039                          | 1.6                         | 28315.9         | P04632      | Calpain small subunit 1                            | T A M R               | 60            | both    | N              | N                 |
| 21 | 2 | 18.11 | 5.18          | 89.8  | HSCH <sub>2</sub> CH <sub>2</sub> CO- | 112               | (L)L V G T Q I D L R(D)                                                                 |              | 551.7977          | 1102.593                     | -0.0044                         | -4                          | 21310.7         | P60953      | Cell division control protein 42 homolog precursor | K T P F               | 110           | treated | N              | N                 |
| 22 | 3 | 10.37 | 10.37         | 55.4  | HSCH <sub>2</sub> CH <sub>2</sub> CO- | 22                | (K)V E E A E P E F V E K V L D R R(V)                                                   | K:PITC       | 799.3807          | 2396.126                     | 0.0015                          | 0.6                         | 20811.5         | Q13185      | Chromobox protein homolog 3                        | G K S K               | 20            | treated | 1, 4           | Y                 |

|    |   |       |       |      |                                       |      |                                                     |        |  |           |          |         |       |          |        |                                                            |      |      |         |      |   |
|----|---|-------|-------|------|---------------------------------------|------|-----------------------------------------------------|--------|--|-----------|----------|---------|-------|----------|--------|------------------------------------------------------------|------|------|---------|------|---|
| 23 | 3 | 19.80 | 7.87  | 95.8 | HSCH <sub>2</sub> CH <sub>2</sub> CO- | 156  | (S)V A E E A AD RH PE R(R)                          |        |  | 489.8939  | 1467.665 | 0.0026  | 1.8   | 25835.4  | Q96CT7 | Coiled-coil domain-containing protein 124                  | IAVL | 154  | both    | 1    | Y |
| 24 | 3 | 14.86 | 5     | 76.4 | HSCH <sub>2</sub> CH <sub>2</sub> CO- | 157  | (V)A E E A AD RH PE R(R)                            |        |  | 456.8726  | 1368.596 | 0.0072  | 5.2   | 25835.4  | Q96CT7 | Coiled-coil domain-containing protein 124                  | AVLS | 155  | treated | 1    | N |
| 25 | 3 | 15.17 | 15.17 | 75.2 | HSCH <sub>2</sub> CH <sub>2</sub> CO- | 89   | (S)H TD IK V P D F SE Y R(R)                        | K:PITC |  | 610.6085  | 1829.799 | 0.0124  | 6.8   | 30815.5  | P0C7P4 | Cytochrome b-c1 complex subunit Rieske-like protein 1      | SVCY | 87   | both    | 1    | N |
| 26 | 3 | 12.02 | 3.32  | 56.8 | HSCH <sub>2</sub> CH <sub>2</sub> CO- | 28   | (S)QGWVLPFGKIVPNTV F V G GIDA R(M)                  | K:PITC |  | 892.4586  | 2675.347 | 0.014   | 5.2   | 82764.9  | Q9NQZ3 | Deleted in azoospermia protein 1                           | SAAA | 26   | vehicle | N    | N |
| 27 | 2 | 13.31 | 6.7   | 82.4 | HSCH <sub>2</sub> CH <sub>2</sub> CO- | 45   | (S)NI P F ITV PLSR(T)                               |        |  | 672.8709  | 1344.734 | 0.0001  | 0.1   | 87302.8  | P54886 | Delta-1-pyrroline-5-carboxylate synthetase                 | VRSW | 43   | both    | 1    | Y |
| 28 | 3 | 15.17 | 7.17  | 78.6 | HSCH <sub>2</sub> CH <sub>2</sub> CO- | 533  | (R)NLHQSGF S LS GA Q ID D NI PR(R)                  |        |  | 753.0311  | 2257.067 | 0.0121  | 5.4   | 62294    | Q16555 | Dihydropyrimidinase-related protein 2                      | APPV | 531  | both    | 1    | N |
| 29 | 3 | 15.80 | 15.8  | 65.1 | HSCH <sub>2</sub> CH <sub>2</sub> CO- | 230  | (R)ETS S D V A L A SH I LTAL R(E)                   |        |  | 624.6575  | 1871.953 | 0.0048  | 2.6   | 36522.1  | Q00273 | DNA fragmentation factor subunit alpha                     | TGIS | 228  | vehicle | N    | N |
| 30 | 3 | 13.01 | 2.51  | 50.7 | HSCH <sub>2</sub> CH <sub>2</sub> CO- | 264  | (R)IAQPGDHVSV T GI F L PIL R(T)                     |        |  | 707.7188  | 2121.153 | -0.0107 | -5    | 81308.4  | P33993 | DNA replication licensing factor MCM7                      | GENT | 262  | vehicle | N    | N |
| 31 | 2 | 23.33 | 13.03 | 91.8 | HSCH <sub>2</sub> CH <sub>2</sub> CO- | 269  | (K)D G V PE GA QL Q G PV H R(N)                     |        |  | 824.4014  | 1647.791 | 0.0048  | 2.9   | 40090.1  | P16989 | DNA-binding protein A                                      | IGEM | 267  | vehicle | 1, 3 | N |
| 32 | 2 | 13.78 | 13.78 | 72.1 | HSCH <sub>2</sub> CH <sub>2</sub> CO- | 92   | (K)ED Y Y Q I L G V P R(N)                          |        |  | 720.8533  | 1440.683 | 0.0165  | 11.5  | 52538.1  | Q96EY1 | DnaJ homolog subfamily A member 3, mitochondrial precursor | APLA | 90   | both    | N    | N |
| 33 | 4 | 11.29 | 11.29 | 70.5 | HSCH <sub>2</sub> CH <sub>2</sub> CO- | 88   | (R)IGPEPTTDSFIAVMHGPTEG V V PGNA L VVD P R(R)       |        |  | 840.919   | 3360.66  | -0.0061 | -1.8  | 60627.2  | Q9H4M9 | EH domain-containing protein 1                             | FPGM | 86   | vehicle | N    | N |
| 34 | 2 | 11.70 | 11.7  | 68.7 | HSCH <sub>2</sub> CH <sub>2</sub> CO- | 412  | (C)VES F S D Y PPL GR(F)                            |        |  | 727.8384  | 1454.662 | 0.0075  | 5.1   | 50141.1  | P68104 | Elongation factor 1-alpha 1                                | GKPM | 410  | vehicle | 1, 2 | N |
| 35 | 2 | 14.89 | 3.15  | 82.2 | HSCH <sub>2</sub> CH <sub>2</sub> CO- | 417  | (S)D Y P P L G R(F)                                 |        |  | 453.2153  | 905.419  | 0.0048  | 5.3   | 50141.1  | P68104 | Elongation factor 1-alpha 1                                | VESF | 415  | vehicle | 1, 2 | N |
| 36 | 3 | 14.81 | 6.4   | 75.6 | HSCH <sub>2</sub> CH <sub>2</sub> CO- | 39   | (F)EAVSS P P PADL CHAL R(W)                         |        |  | 584.2809  | 1750.825 | 0.003   | 1.7   | 24763.9  | P24534 | Elongation factor 1-beta                                   | DVAV | 37   | treated | 1, 2 | N |
| 37 | 4 | 14.58 | 14.58 | 69.1 | HSCH <sub>2</sub> CH <sub>2</sub> CO- | 31   | (R)VLSA P P HF H F GQTN R(T)                        |        |  | 449.7252  | 1795.87  | 0.0093  | 5.2   | 50119.1  | P26641 | Elongation factor 1-gamma                                  | GAQV | 29   | both    | 3    | N |
| 38 | 4 | 11.42 | 7.89  | 73.0 | HSCH <sub>2</sub> CH <sub>2</sub> CO- | 803  | (S)NTG GQ A F PQC VFDHWQIL PGD PFD NSSRPSQVVAETR(K) |        |  | 1048.0028 | 4188.929 | 0.0603  | 14.4  | 95338.7  | P13639 | Elongation factor 2                                        | ADLR | 801  | treated | 1, 5 | N |
| 39 | 4 | 14.25 | 14.25 | 77.9 | HSCH <sub>2</sub> CH <sub>2</sub> CO- | 512  | (R)FQSSHPTD I T S L D Q Y V E R(M)                  |        |  | 587.7738  | 2348.061 | 0.0122  | 5.2   | 92469.3  | P14625 | Endoplasmic precursor                                      | AKLL | 510  | both    | 1, 4 | N |
| 40 | 3 | 13.48 | 13.48 | 75.6 | HSCH <sub>2</sub> CH <sub>2</sub> CO- | 15   | (A)DA S K G D D L L PAGTEDYI HIR(I)                 | K:PITC |  | 803.7035  | 2409.085 | 0.011   | 4.6   | 12732.6  | P41567 | Eukaryotic translation initiation factor 1                 | FDPF | 13   | treated | N    | N |
| 41 | 3 | 19.65 | 10.18 | 92.3 | HSCH <sub>2</sub> CH <sub>2</sub> CO- | 803  | (R)LHLSGIDAN PN A L F P PVE F PAP R(G)              |        |  | 854.1137  | 2560.302 | 0.0249  | 9.7   | 273401   | P49327 | Fatty acid synthase                                        | AGIG | 801  | vehicle | N    | N |
| 42 | 4 | 12.71 | 12.71 | 69.0 | HSCH <sub>2</sub> CH <sub>2</sub> CO- | 2052 | (R)VSGQGLHEGHTFE PAE F I D T R(D)                   |        |  | 632.8132  | 2528.187 | 0.0435  | 17.2  | 280740.4 | P21333 | Filamin-A                                                  | ASRV | 2050 | both    | 1    | N |
| 43 | 2 | 11.23 | 2.05  | 75.0 | HSCH <sub>2</sub> CH <sub>2</sub> CO- | 1708 | (T)A P E PGKYVIT I R(F)                             | K:PITC |  | 783.8786  | 1566.781 | -0.0308 | -19.7 | 290960.7 | Q14315 | Filamin-C                                                  | DIYY | 1706 | treated | N    | N |
| 44 | 3 | 11.64 | 11.64 | 62.2 | HSCH <sub>2</sub> CH <sub>2</sub> CO- | 363  | (L)FS LSAAGVT QELA ISRRQ R(R)                       |        |  | 726.7262  | 2178.145 | 0.0193  | 8.8   | 50708.7  | Q14764 | Gamma-aminobutyric acid receptor subunit delta precursor   | NAIV | 361  | vehicle | N    | N |
| 45 | 2 | 14.49 | 2.33  | 79.3 | HSCH <sub>2</sub> CH <sub>2</sub> CO- | 321  | (L)L A L LEAA L R(S)                                |        |  | 529.3089  | 1057.607 | 0.0031  | 2.9   | 50509.7  | Q6P531 | Gamma-glutamyltransferase 6 precursor                      | AGPE | 319  | treated | N    | N |
| 46 | 2 | 19.71 | 19.71 | 91.5 | HSCH <sub>2</sub> CH <sub>2</sub> CO- | 257  | (L)L SGDT Q T D A T S F YD R(V)                     |        |  | 882.8773  | 1764.738 | 0.0092  | 5.2   | 59425.8  | P14314 | Glucosidase 2 subunit beta precursor                       | EAQA | 255  | both    | N    | N |

|    |   |       |       |      |                                       |     |                                        |        |  |          |          |         |      |         |        |                                                           |      |     |         |            |   |
|----|---|-------|-------|------|---------------------------------------|-----|----------------------------------------|--------|--|----------|----------|---------|------|---------|--------|-----------------------------------------------------------|------|-----|---------|------------|---|
| 47 | 2 | 10.66 | 10.66 | 68.3 | HSCH <sub>2</sub> CH <sub>2</sub> CO- | 171 | (C)LDA\AF\PL/L\SAYVGR(L)               |        |  | 755.3916 | 1509.777 | -0.0011 | -0.7 | 23356   | P09211 | Glutathione S-transferase P                               | LAPG | 169 | vehicle | 2          | N |
| 48 | 3 | 11.45 | 11.45 | 73.4 | HSCH <sub>2</sub> CH <sub>2</sub> CO- | 235 | (R)VPTAN\VS\I/V/D/L/TC/R(L)            |        |  | 521.2676 | 1561.771 | 0.017   | 10.9 | 36053.4 | P04406 | Glyceraldehyde-3-phosphate dehydrogenase                  | GMAF | 233 | vehicle | 4          | N |
| 49 | 2 | 10.41 | 10.41 | 55.9 | HSCH <sub>2</sub> CH <sub>2</sub> CO- | 299 | (G)K\LT/G/M/A/F/R(V)                   | K:PITC |  | 573.7689 | 1146.526 | 0.0048  | 4.2  | 44501.4 | Q14556 | Glyceraldehyde-3-phosphate dehydrogenase, testis-specific | PELK | 297 | treated | 2          | N |
| 50 | 2 | 10.33 | 2.98  | 59.0 | HSCH <sub>2</sub> CH <sub>2</sub> CO- | 318 | (E)P\VE\K/A/L/R(D)                     | K:PITC |  | 518.261  | 1035.511 | 0.0033  | 3.2  | 70375.4 | P34931 | Heat shock 70 kDa protein 1L                              | RGTL | 316 | treated | N          | N |
| 51 | 2 | 13.06 | 13.06 | 62.2 | HSCH <sub>2</sub> CH <sub>2</sub> CO- | 156 | (S)VM\DA/T/Q/I/A/G/L/N/CL/R(L)         |        |  | 796.8985 | 1592.759 | 0.0304  | 19.1 | 94300.5 | P34932 | Heat shock 70 kDa protein 4                               | AERR | 154 | treated | 1          | N |
| 52 | 3 | 16.44 | 16.44 | 79.7 | HSCH <sub>2</sub> CH <sub>2</sub> CO- | 457 | (R)YHTSQSGD\E\M\T\S/L/S/E/Y/V/SR(M)    |        |  | 755.657  | 2264.943 | 0.013   | 5.7  | 83264.6 | P08238 | Heat shock protein HSP 90-beta                            | SELL | 455 | both    | 1, 3, 4    | N |
| 53 | 3 | 19.49 | 10.99 | 90.2 | HSCH <sub>2</sub> CH <sub>2</sub> CO- | 625 | (K)H\LE\I\N/PD/H\PI/VETLR(Q)           |        |  | 624.3207 | 1870.948 | -0.0004 | -0.2 | 83264.6 | P08238 | Heat shock protein HSP 90-beta                            | MMAK | 623 | treated | 1, 3, 4    | N |
| 54 | 2 | 13.96 | 8.33  | 69.1 | HSCH <sub>2</sub> CH <sub>2</sub> CO- | 626 | (H)L\E\I\N/PD/H\PIVETLR(Q)             |        |  | 867.4439 | 1733.889 | -0.0086 | -4.9 | 83264.6 | P08238 | Heat shock protein HSP 90-beta                            | MAKK | 624 | treated | 1, 3, 4    | N |
| 55 | 3 | 10.66 | 10.66 | 56.1 | HSCH <sub>2</sub> CH <sub>2</sub> CO- | 215 | (T)I\EDG\I\F\VK/S/T/A/GDTHLGGEDFDNR(M) | K:PITC |  | 982.4357 | 2945.272 | 0.0209  | 7.1  | 70021.3 | P54652 | Heat shock-related 70 kDa protein 2                       | VSIL | 213 | treated | 4          | N |
| 56 | 3 | 16.18 | 16.18 | 79.7 | HSCH <sub>2</sub> CH <sub>2</sub> CO- | 19  | (V)GAHAG\E\Y\G\A/E/A/L/E/R(M)          |        |  | 506.8991 | 1518.664 | 0.0186  | 12.2 | 15257.6 | P69905 | Hemoglobin subunit alpha                                  | AWGK | 17  | treated | N          | N |
| 57 | 2 | 12.04 | 12.04 | 70.0 | HSCH <sub>2</sub> CH <sub>2</sub> CO- | 185 | (I)FV\G\G\L\I\S\PD\T/PEEKIR(E)         | K:PITC |  | 934.4395 | 1867.872 | 0       | 0    | 38434.4 | Q14103 | Heterogeneous nuclear ribonucleoprotein D0                | PVKK | 183 | treated | 1, 2       | N |
| 58 | 3 | 12.55 | 12.55 | 64.2 | HSCH <sub>2</sub> CH <sub>2</sub> CO- | 415 | (R)HESGA\SI\KI\I\D/E\I\G\SED/R(I)      | K:PITC |  | 764.6828 | 2291.991 | 0.0431  | 18.8 | 50976.5 | P61978 | Heterogeneous nuclear ribonucleoprotein K                 | IKQI | 413 | vehicle | 1, 5, 6, 7 | N |
| 59 | 5 | 13.12 | 13.12 | 63.7 | HSCH <sub>2</sub> CH <sub>2</sub> CO- | 96  | (R)M\VV\NEGSDGGQSV\Y/HV/HL/H/V/LGGR(Q) |        |  | 527.8602 | 2635.25  | 0.0215  | 8.2  | 13802   | P49773 | Histidine triad nucleotide-binding protein 1              | NKGY | 94  | vehicle | 1          | N |
| 60 | 3 | 12.08 | 12.08 | 65.4 | HSCH <sub>2</sub> CH <sub>2</sub> CO- | 32  | (A)AGV\T\DGNEVAKAQA\T\PGGA/A\PI\FSR(I) | K:PITC |  | 946.4547 | 2837.334 | 0.015   | 5.3  | 17161.8 | Q9BX68 | Histidine triad nucleotide-binding protein 2              | QVRG | 30  | treated | 1          | Y |
| 61 | 2 | 11.85 | 3.34  | 71.1 | HSCH <sub>2</sub> CH <sub>2</sub> CO- | 22  | (R)A\G\L\Q\F\PV\G/R(I)                 |        |  | 516.7703 | 1032.53  | 0.0038  | 3.7  | 14233.6 | Q96QV6 | Histone H2A type 1-A                                      | SRSS | 20  | vehicle | 1          | N |
| 62 | 2 | 13.64 | 13.64 | 78.1 | HSCH <sub>2</sub> CH <sub>2</sub> CO- | 57  | (L)EY\L\T\AE\I\I\I\I\A/G/NAAR(D)       |        |  | 911.4504 | 1821.905 | -0.0116 | -6.4 | 14135.6 | P04908 | Histone H2A type 1-B                                      | LAAY | 55  | treated | 1          | N |
| 63 | 2 | 16.54 | 16.54 | 83.5 | HSCH <sub>2</sub> CH <sub>2</sub> CO- | 59  | (Y)LT\A\E\I\I\I\I\A/G/NAAR(D)          |        |  | 765.3982 | 1529.799 | -0.0101 | -6.6 | 14135.6 | P04908 | Histone H2A type 1-B                                      | AVLE | 57  | treated | 1          | N |
| 64 | 2 | 14.60 | 10.58 | 85.3 | HSCH <sub>2</sub> CH <sub>2</sub> CO- | 61  | (T)AE\I\I\I\I\A/G/NAAR(D)              |        |  | 658.3392 | 1315.668 | 0.0037  | 2.8  | 14135.6 | P04908 | Histone H2A type 1-B                                      | LEYL | 59  | both    | 1          | N |
| 65 | 2 | 15.59 | 15.59 | 79.3 | HSCH <sub>2</sub> CH <sub>2</sub> CO- | 62  | (G)I\M\N\I\F/V\NDI\FE/R(I)             |        |  | 786.8751 | 1572.718 | 0.0244  | 15.5 | 13950.3 | P33778 | Histone H2B type 1-B                                      | SKAM | 60  | treated | 1, 3       | N |
| 66 | 2 | 15.04 | 8.83  | 84.1 | HSCH <sub>2</sub> CH <sub>2</sub> CO- | 63  | (I)M\N\I\F/V\NDI\FE/R(I)               |        |  | 730.3321 | 1459.634 | 0.0225  | 15.4 | 13950.3 | P33778 | Histone H2B type 1-B                                      | KAMG | 61  | vehicle | 1, 3       | N |
| 67 | 2 | 17.92 | 7.59  | 88.8 | HSCH <sub>2</sub> CH <sub>2</sub> CO- | 66  | (S)F\I\N\DI\FE/R(I)                    |        |  | 564.2667 | 1127.519 | 0.0071  | 6.3  | 13950.3 | P33778 | Histone H2B type 1-B                                      | GIMN | 64  | treated | 1, 3       | N |
| 68 | 2 | 14.67 | 14.67 | 83.0 | HSCH <sub>2</sub> CH <sub>2</sub> CO- | 25  | (R)D\N\I\Q\G\I\T\K\PAI/R(R)            | K:PITC |  | 774.8876 | 1548.766 | 0.0018  | 1.2  | 11367.4 | P62805 | Histone H4                                                | RKVL | 23  | both    | 3          | N |
| 69 | 2 | 10.88 | 4.1   | 79.0 | HSCH <sub>2</sub> CH <sub>2</sub> CO- | 47  | (R)I\I\G\L\I\Y/E/ETR(G)                |        |  | 634.8136 | 1268.619 | 0.0008  | 0.6  | 11367.4 | P62805 | Histone H4                                                | GGVK | 45  | treated | 3          | N |
| 70 | 2 | 16.85 | 4.81  | 89.8 | HSCH <sub>2</sub> CH <sub>2</sub> CO- | 50  | (G)L\I\Y/E/T/R(R)                      |        |  | 506.2452 | 1011.482 | 0.0016  | 1.5  | 11009.2 | Q99525 | Histone H4-like protein type G                            | KRIL | 48  | treated | N          | N |
| 71 | 3 | 10.70 | 5.23  | 66.5 | HSCH <sub>2</sub> CH <sub>2</sub> CO- | 45  | (R)LAVHPSG\I\A\I\Q/D/R(V)              |        |  | 484.2563 | 1450.747 | 0.0072  | 5    | 17887.6 | P05161 | Interferon-induced 17 kDa protein precursor               | AFQQ | 43  | vehicle | N          | N |

|    |   |       |       |      |                                       |     |                                            |        |           |          |         |       |          |        |                                                        |      |     |         |      |   |
|----|---|-------|-------|------|---------------------------------------|-----|--------------------------------------------|--------|-----------|----------|---------|-------|----------|--------|--------------------------------------------------------|------|-----|---------|------|---|
| 72 | 3 | 16.47 | 8.16  | 74.3 | HSCH <sub>2</sub> CH <sub>2</sub> CO- | 298 | (R)VTGNFKHASPILPI/T/E/F/SDI/P/R(R)         | K:PITC | 888.1116  | 2662.316 | 0.0046  | 1.7   | 50670.5  | P42167 | Lamina-associated polypeptide 2, isoforms beta/gamma   | LVVN | 296 | both    | 1, 5 | N |
| 73 | 2 | 23.38 | 15.58 | 98.1 | HSCH <sub>2</sub> CH <sub>2</sub> CO- | 305 | (H)A/S/P/I/L/P/I/TE/FSD/I/P/R(R)           |        | 872.4476  | 1743.899 | -0.0107 | -6.1  | 50670.5  | P42167 | Lamina-associated polypeptide 2, isoforms beta/gamma   | GNFK | 303 | treated | 1, 5 | N |
| 74 | 4 | 10.05 | 2.06  | 57.7 | HSCH <sub>2</sub> CH <sub>2</sub> CO- | 513 | (A)HPFRDLPLGREQHCKL/P/GVADI/R(A)           | K:PITC | 748.3802  | 2990.506 | -0.0073 | -2.4  | 71190.5  | Q8NA19 | Lethal(3)malignant brain tumor-like 4 protein          | STVS | 511 | vehicle | N    | N |
| 75 | 3 | 10.07 | 2.89  | 72.0 | HSCH <sub>2</sub> CH <sub>2</sub> CO- | 311 | (R)VLHVSENPV/PL/TV/R(V)                    |        | 549.9685  | 1647.889 | 0.0023  | 1.4   | 63473.3  | Q8N1G4 | Leucine-rich repeat-containing protein 47              | RLLL | 309 | both    | 1    | N |
| 76 | 2 | 21.38 | 14.39 | 95.1 | HSCH <sub>2</sub> CH <sub>2</sub> CO- | 603 | (S)P\A L T E N E H I/R(A)                  |        | 690.8507  | 1380.694 | 0.0001  | 0.1   | 113744.7 | O00754 | Lysosomal alpha-mannosidase precursor                  | RRSW | 601 | treated | N    | N |
| 77 | 2 | 12.98 | 12.98 | 83.3 | HSCH <sub>2</sub> CH <sub>2</sub> CO- | 203 | (E)IV\ A D V L DN DSWR(L)                  |        | 802.3897  | 1603.778 | -0.0063 | -4    | 47079.5  | P22234 | Multifunctional protein ADE2                           | VTTK | 201 | treated | N    | N |
| 78 | 2 | 15.08 | 15.08 | 85.7 | HSCH <sub>2</sub> CH <sub>2</sub> CO- | 678 | (A)V\S L L E E V I T/P/R(K)                |        | 672.3633  | 1343.724 | -0.0046 | -3.4  | 115704.5 | Q9H0A0 | N-acetyltransferase 10                                 | VSSE | 676 | treated | N    | N |
| 79 | 3 | 12.63 | 12.63 | 63.5 | HSCH <sub>2</sub> CH <sub>2</sub> CO- | 94  | (R)DPAETLHLSEP\LGGK/L/L/E/E/Y/T/Q/L/A/R(E) | K:PITC | 1001.8295 | 3003.459 | 0.0149  | 5     | 35896.7  | Q86X76 | Nitrilase homolog 1                                    | DFIA | 92  | vehicle | N    | N |
| 80 | 3 | 12.45 | 12.45 | 67.5 | HSCH <sub>2</sub> CH <sub>2</sub> CO- | 220 | (E)GA D N Q G A GEQGRPV/R(Q)               |        | 533.9176  | 1599.729 | 0.009   | 5.6   | 35924.3  | P67809 | Nuclease-sensitive element-binding protein 1           | GEVM | 218 | treated | 1    | N |
| 81 | 2 | 12.02 | 6.71  | 84.2 | HSCH <sub>2</sub> CH <sub>2</sub> CO- | 9   | (F)DI A V D G E PLGR(V)                    |        | 615.2949  | 1229.583 | -0.0005 | -0.4  | 18012.6  | P62937 | Peptidyl-prolyl cis-trans isomerase A                  | PTVF | 7   | treated | 1, 2 | N |
| 82 | 2 | 11.24 | 3.12  | 70.9 | HSCH <sub>2</sub> CH <sub>2</sub> CO- | 98  | (K)RTVPTGDL/A/L/R(P)                       |        | 643.8433  | 1286.689 | -0.0092 | -7.2  | 155004.6 | Q9BXM0 | Periaxin                                               | SFCL | 96  | treated | N    | N |
| 83 | 4 | 17.36 | 9.8   | 93.3 | HSCH <sub>2</sub> CH <sub>2</sub> CO- | 272 | (R)DQHDTFFLRDPA E A L Q L P M/D/YVQ/R(V)   |        | 749.1136  | 2993.392 | 0.0405  | 13.5  | 57563.9  | Q9Y285 | Phenylalanyl-tRNA synthetase alpha chain               | QHPA | 270 | both    | N    | N |
| 84 | 2 | 20.30 | 20.3  | 97.7 | HSCH <sub>2</sub> CH <sub>2</sub> CO- | 109 | (C)AN P A A G S V I L E N L R(F)           |        | 813.4362  | 1625.868 | -0.0028 | -1.7  | 44615    | P00558 | Phosphoglycerate kinase 1                              | VEKA | 107 | vehicle | 2    | N |
| 85 | 2 | 13.23 | 2.17  | 77.9 | HSCH <sub>2</sub> CH <sub>2</sub> CO- | 116 | (S)V I L L E N L R(F)                      |        | 529.3077  | 1057.607 | 0.0007  | 0.7   | 44615    | P00558 | Phosphoglycerate kinase 1                              | PAAG | 114 | vehicle | 2    | N |
| 86 | 3 | 11.73 | 11.73 | 67.5 | HSCH <sub>2</sub> CH <sub>2</sub> CO- | 11  | (R)HGESA W N L E N R(F)                    |        | 467.5428  | 1400.601 | 0.0127  | 9     | 28804.1  | P18669 | Phosphoglycerate mutase 1                              | LVLI | 9   | treated | 1, 2 | N |
| 87 | 4 | 11.02 | 11.02 | 56.4 | HSCH <sub>2</sub> CH <sub>2</sub> CO- | 127 | (R)LSFAHPPSAEVE A A L A T L HD R(M)        |        | 609.0639  | 2433.223 | 0.0107  | 4.4   | 144665   | Q15067 | Phosphoribosylformylglyc inamidase synthase            | TRRY | 125 | vehicle | N    | N |
| 88 | 2 | 17.37 | 9.88  | 86.1 | HSCH <sub>2</sub> CH <sub>2</sub> CO- | 518 | (N)DD I I V N W V N E TL R(E)              |        | 837.9106  | 1674.816 | -0.0017 | -1    | 70289.7  | P13796 | Plastin-2                                              | GQKV | 516 | treated | N    | N |
| 89 | 2 | 16.46 | 16.46 | 58.0 | HSCH <sub>2</sub> CH <sub>2</sub> CO- | 230 | (T)I/S PLD L A K L N Q V A R(Q)            | K:PITC | 880.95    | 1760.919 | -0.0259 | -14.7 | 37498    | Q15365 | Poly(rC)-binding protein 1                             | QGQH | 228 | vehicle | 1    | N |
| 90 | 4 | 10.23 | 4.59  | 68.3 | HSCH <sub>2</sub> CH <sub>2</sub> CO- | 16  | (P)GDAPRAEL VAL TAVQSEQGEAGGG GS P/R(R)    |        | 692.8437  | 2768.327 | 0.0262  | 9.5   | 77092.2  | P56696 | Potassium voltage-gated channel subfamily KQT member 4 | LGPP | 14  | vehicle | N    | N |
| 91 | 2 | 23.56 | 23.56 | 97.8 | HSCH <sub>2</sub> CH <sub>2</sub> CO- | 196 | (G)DV\C QD C I Q M V T D I Q T A V R(T)    |        | 1063.4758 | 2125.939 | 0.0058  | 2.7   | 58113.1  | P07602 | Proactivator polypeptide precursor                     | PKDN | 194 | both    | 1    | N |
| 92 | 2 | 14.82 | 8.69  | 84.5 | HSCH <sub>2</sub> CH <sub>2</sub> CO- | 81  | (R)ELS E L V Y T DV L DR(S)                |        | 820.3973  | 1639.788 | -0.001  | -0.6  | 20694.6  | Q8WU39 | Proapoptotic caspase adapter protein precursor         | SGGR | 79  | treated | N    | N |
| 93 | 2 | 14.83 | 14.83 | 63.8 | HSCH <sub>2</sub> CH <sub>2</sub> CO- | 43  | (N)I T PAE V G V L V GKDR(S)               | K:PITC | 838.9307  | 1676.85  | 0.0043  | 2.5   | 15054.3  | P07737 | Profilin-1                                             | KTFV | 41  | treated | N    | N |
| 94 | 2 | 17.13 | 17.13 | 86.4 | HSCH <sub>2</sub> CH <sub>2</sub> CO- | 147 | (H)E E A T M T I E E L L T R(Y)            |        | 812.3834  | 1623.76  | -0.0009 | -0.6  | 59271.9  | Q15355 | Protein phosphatase 1G                                 | AALL | 145 | vehicle | 1    | N |
| 95 | 4 | 15.15 | 11.04 | 84.5 | HSCH <sub>2</sub> CH <sub>2</sub> CO- | 100 | (F)VNHPQVSA L L G E E DEE ALH YLTR(V)      |        | 677.8332  | 2708.298 | 0.0125  | 4.6   | 33489    | Q01105 | Protein SET                                            | WVTT | 98  | treated | 3, 8 | N |

|     |   |       |       |      |                                       |      |                                                                    |        |  |           |          |         |      |          |        |                                             |      |      |         |         |   |
|-----|---|-------|-------|------|---------------------------------------|------|--------------------------------------------------------------------|--------|--|-----------|----------|---------|------|----------|--------|---------------------------------------------|------|------|---------|---------|---|
| 96  | 2 | 13.44 | 3.96  | 86.0 | HSCH <sub>2</sub> CH <sub>2</sub> CO- | 180  | (E)E\L I PE\YLN\I/R(G)                                             |        |  | 747.892   | 1494.766 | 0.0106  | 7.1  | 47712.1  | Q58FG1 | Putative heat shock protein HSP 90-alpha A4 | MDNC | 178  | vehicle | N       | N |
| 97  | 3 | 18.08 | 8.46  | 90.5 | HSCH <sub>2</sub> CH <sub>2</sub> CO- | 66   | (A)AP\V\PTAPAAGA\PLMDF\GND\FV\PPA\PR(G)                            |        |  | 888.7714  | 2664.295 | 0.0048  | 1.8  | 129932   | Q9NQC3 | Reticulon-4                                 | AGLS | 64   | treated | 1       | Y |
| 98  | 2 | 19.13 | 10.86 | 94.2 | HSCH <sub>2</sub> CH <sub>2</sub> CO- | 93   | (G)P\L P A A P PV\APER(Q)                                          |        |  | 651.8457  | 1302.688 | -0.0033 | -2.6 | 129932   | Q9NQC3 | Reticulon-4                                 | PAPR | 91   | treated | 1       | N |
| 99  | 2 | 23.51 | 23.51 | 96.6 | HSCH <sub>2</sub> CH <sub>2</sub> CO- | 289  | (L)A\M P L PE PE PL PL PLEVV\R(G)                                  |        |  | 1043.0656 | 2085.112 | 0.0116  | 5.6  | 50414.3  | Q9BTD8 | RNA-binding protein 42                      | LPLA | 287  | both    | N       | N |
| 100 | 3 | 13.53 | 7.25  | 54.3 | HSCH <sub>2</sub> CH <sub>2</sub> CO- | 127  | (M)ALAFS\EQEE\HE\L PV\LS\R(Q)                                      |        |  | 681.6784  | 2042.985 | 0.0355  | 17.4 | 41595.7  | Q75995 | SAM and SH3 domain-containing protein 3     | GPEK | 125  | vehicle | N       | N |
| 101 | 2 | 10.35 | 2.22  | 65.9 | HSCH <sub>2</sub> CH <sub>2</sub> CO- | 290  | (M)YT I MNPIQGAG\R(A)                                              |        |  | 733.3459  | 1465.693 | -0.0081 | -5.5 | 39388.6  | Q9BWG4 | Single-stranded DNA-binding protein 4       | SSEN | 288  | vehicle | N       | N |
| 102 | 2 | 10.21 | 2.21  | 60.6 | HSCH <sub>2</sub> CH <sub>2</sub> CO- | 289  | (I)EIFLVY I V P R(A)                                               |        |  | 668.8712  | 1336.733 | 0.0018  | 1.3  | 127617.7 | Q9UHW9 | Solute carrier family 12 member 6           | ILGA | 287  | both    | N       | N |
| 103 | 3 | 12.58 | 5.57  | 69.3 | HSCH <sub>2</sub> CH <sub>2</sub> CO- | 249  | (R)IVNHPTM\L Q D PD V R(E)                                         |        |  | 574.9495  | 1722.83  | 0.0038  | 2.2  | 59069.8  | Q13596 | Sorting nexin-1                             | RYLQ | 247  | both    | N       | N |
| 104 | 4 | 10.47 | 10.47 | 68.0 | HSCH <sub>2</sub> CH <sub>2</sub> CO- | 1845 | (R)MHTTFEHD I Q A\L GT QV R(Q)                                     |        |  | 518.751   | 2071.969 | 0.0134  | 6.5  | 274610.6 | Q01082 | Spectrin beta chain, brain 1                | ETLQ | 1843 | treated | N       | N |
| 105 | 2 | 12.10 | 12.1  | 63.6 | HSCH <sub>2</sub> CH <sub>2</sub> CO- | 15   | (R)AS\G Q A\F E\L I SP R(S)                                        |        |  | 738.8804  | 1476.752 | 0.002   | 1.4  | 17302.6  | P16949 | Stathmin                                    | ELEK | 13   | vehicle | 1, 2    | N |
| 106 | 2 | 15.60 | 2.16  | 84.7 | HSCH <sub>2</sub> CH <sub>2</sub> CO- | 21   | (F)E\L I L S P R(S)                                                |        |  | 458.26    | 915.497  | 0.0159  | 17.4 | 17302.6  | P16949 | Stathmin                                    | SGQA | 19   | treated | 1, 2    | N |
| 107 | 3 | 13.06 | 13.06 | 57.3 | HSCH <sub>2</sub> CH <sub>2</sub> CO- | 89   | (N)IVAYHDSI M N PD Y N V E FFR(Q)                                  |        |  | 806.7029  | 2418.089 | 0.0048  | 2    | 71224    | Q9UBT2 | SUMO-activating enzyme subunit 2            | YPKA | 87   | treated | N       | N |
| 108 | 2 | 10.01 | 3.32  | 67.2 | HSCH <sub>2</sub> CH <sub>2</sub> CO- | 32   | (E)DIVFETDH I L ESLYRD I R(D)                                      |        |  | 1161.5724 | 2322.144 | -0.0059 | -2.6 | 33196    | Q75558 | Syntaxin-11                                 | DSPH | 30   | treated | N       | N |
| 109 | 3 | 12.71 | 7.11  | 64.9 | HSCH <sub>2</sub> CH <sub>2</sub> CO- | 439  | (R)VGKVEHGSV A L P A IM R(S)                                       | K:PITC |  | 629.6569  | 1886.944 | 0.0124  | 6.6  | 269768.5 | Q9Y490 | Talin-1                                     | QQYN | 437  | vehicle | 1       | N |
| 110 | 4 | 15.63 | 15.63 | 54.1 | HSCH <sub>2</sub> CH <sub>2</sub> CO- | 1691 | (R)EGIS\QEALHTQML T A VQ\EISHL E PL ANAAR(A)                       |        |  | 865.4453  | 3458.741 | 0.0187  | 5.4  | 269768.5 | Q9Y490 | Talin-1                                     | QLAP | 1689 | vehicle | 1       | N |
| 111 | 2 | 20.75 | 20.75 | 91.8 | HSCH <sub>2</sub> CH <sub>2</sub> CO- | 2495 | (M)VGG I A Q I I A Q E E M L R(K)                                  |        |  | 893.9595  | 1786.919 | -0.0073 | -4.1 | 269768.5 | Q9Y490 | Talin-1                                     | VKEK | 2493 | both    | 1       | N |
| 112 | 2 | 23.54 | 23.54 | 93.8 | HSCH <sub>2</sub> CH <sub>2</sub> CO- | 342  | (E)AA M L G Q A E E V V Q E R(I)                                   |        |  | 809.881   | 1618.756 | -0.0016 | -1   | 60343.9  | P17987 | T-complex protein 1 subunit alpha           | EETF | 340  | treated | 3, 4    | N |
| 113 | 2 | 18.50 | 10.35 | 83.3 | HSCH <sub>2</sub> CH <sub>2</sub> CO- | 345  | (M)L G Q A E E V V Q E R(I)                                        |        |  | 673.3245  | 1345.642 | 0.0001  | 0.1  | 60343.9  | P17987 | T-complex protein 1 subunit alpha           | FEAA | 343  | treated | 3, 4    | N |
| 114 | 3 | 19.89 | 15.48 | 91.5 | HSCH <sub>2</sub> CH <sub>2</sub> CO- | 456  | (A)DA M E V I PSTLAENA GL N PIST V TE L R(N)                       |        |  | 943.807   | 2829.401 | 0.0056  | 2    | 57924.6  | P50991 | T-complex protein 1 subunit delta           | VRAF | 454  | treated | 1, 3, 4 | N |
| 115 | 2 | 13.40 | 7.81  | 74.8 | HSCH <sub>2</sub> CH <sub>2</sub> CO- | 114  | (A)GAL L E E AE Q L L DR(G)                                        |        |  | 772.8848  | 1544.763 | -0.0002 | -0.1 | 59671.4  | P48643 | T-complex protein 1 subunit epsilon         | VVVL | 112  | treated | 1, 2, 3 | N |
| 116 | 4 | 15.11 | 15.11 | 65.6 | HSCH <sub>2</sub> CH <sub>2</sub> CO- | 40   | (R)GLDPSLSPPLNLPQPGALPTEQENILHTTQDCYNNL AA CL L Q M E PV N YE R(V) |        |  | 1465.9624 | 5860.797 | 0.0312  | 5.3  | 20012.7  | Q8N5M4 | Tetratricopeptide repeat protein 9C         | LLQL | 38   | vehicle | 5       | N |
| 117 | 2 | 12.50 | 3.04  | 73.4 | HSCH <sub>2</sub> CH <sub>2</sub> CO- | 731  | (S)L\D Q P GGT LDLT L I R(A)                                       |        |  | 800.4191  | 1599.841 | -0.0101 | -6.3 | 88550.2  | Q13263 | Transcription intermediary factor 1-beta    | DSTF | 729  | treated | 3       | N |
| 118 | 2 | 13.57 | 2.87  | 76.7 | HSCH <sub>2</sub> CH <sub>2</sub> CO- | 553  | (F)G E S E A N V R(E)                                              |        |  | 475.2093  | 949.404  | 0.007   | 7.3  | 89322.3  | P55072 | Transitional endoplasmic reticulum ATPase   | LTMW | 551  | vehicle | N       | N |
| 119 | 3 | 11.62 | 11.62 | 70.9 | HSCH <sub>2</sub> CH <sub>2</sub> CO- | 568  | (G)IG E A V SSA V V GE PGITVTHL AVNR(V)                            |        |  | 822.1044  | 2464.286 | 0.0122  | 5    | 67878    | P29401 | Transketolase                               | YYEG | 566  | vehicle | N       | N |
| 120 | 3 | 16.51 | 7.67  | 85.6 | HSCH <sub>2</sub> CH <sub>2</sub> CO- | 167  | (R)PLHIST F I N E L D S GF R(L)                                    |        |  | 645.3258  | 1933.948 | 0.0152  | 7.9  | 26183.1  | Q15631 | Translin                                    | GDYS | 165  | both    | N       | N |

|     |   |       |       |      |                                       |     |                                      |        |          |          |         |       |          |        |                                     |      |     |         |      |   |
|-----|---|-------|-------|------|---------------------------------------|-----|--------------------------------------|--------|----------|----------|---------|-------|----------|--------|-------------------------------------|------|-----|---------|------|---|
| 121 | 2 | 21.74 | 12.09 | 95.6 | HSCH <sub>2</sub> CH <sub>2</sub> CO- | 48  | (R)E A P V D V L T Q I GR(S)         |        | 693.3574 | 1385.709 | -0.0018 | -1.3  | 26210.1  | Q9BVC6 | Transmembrane protein 109 precursor | GQQK | 46  | both    | N    | N |
| 122 | 2 | 12.55 | 4.62  | 80.2 | HSCH <sub>2</sub> CH <sub>2</sub> CO- | 197 | (L)H L G V T PSVI(R(K)               |        | 583.8193 | 1166.635 | -0.0037 | -3.2  | 61248.2  | Q14773 | Tripeptidyl-peptidase 1 precursor   | GTVG | 195 | both    | 1    | Y |
| 123 | 3 | 13.96 | 3.61  | 63.7 | HSCH <sub>2</sub> CH <sub>2</sub> CO- | 65  | (R)AVFVDLEPT V I D E V R(T)          |        | 597.3097 | 1789.904 | 0.0105  | 5.9   | 50135.9  | Q71U36 | Tubulin alpha-1A chain              | KHVP | 63  | vehicle | 1, 9 | N |
| 124 | 2 | 17.87 | 9.5   | 92.2 | HSCH <sub>2</sub> CH <sub>2</sub> CO- | 66  | (A)VFV D L E PTV IDE V R(T)          |        | 859.9339 | 1718.867 | -0.0064 | -3.7  | 50135.9  | Q71U36 | Tubulin alpha-1A chain              | HVPR | 64  | treated | 1, 9 | N |
| 125 | 2 | 11.23 | 11.23 | 68.6 | HSCH <sub>2</sub> CH <sub>2</sub> CO- | 67  | (V)FV D L E PTVIDE V R(T)            |        | 810.4092 | 1619.799 | 0.0126  | 7.8   | 50135.9  | Q71U36 | Tubulin alpha-1A chain              | VPRA | 65  | vehicle | 1, 9 | N |
| 126 | 2 | 10.78 | 7.18  | 78.4 | HSCH <sub>2</sub> CH <sub>2</sub> CO- | 250 | (N)VDL T E F Q TNL V PY PR(I)        |        | 940.4655 | 1879.926 | -0.0021 | -1.1  | 50135.9  | Q71U36 | Tubulin alpha-1A chain              | DGAL | 248 | treated | 1, 9 | N |
| 127 | 2 | 10.90 | 5.6   | 71.2 | HSCH <sub>2</sub> CH <sub>2</sub> CO- | 63  | (R)A L V D L E PGTMD SV R(S)         |        | 852.4119 | 1703.834 | -0.0177 | -10.4 | 49907.3  | Q13885 | Tubulin beta-2A chain               | KYVP | 61  | vehicle | 1, 5 | N |
| 128 | 2 | 22.94 | 13.17 | 99.1 | HSCH <sub>2</sub> CH <sub>2</sub> CO- | 64  | (A)IL V D L E P GT MD SV R(S)        |        | 816.9012 | 1632.797 | -0.002  | -1.2  | 49907.3  | Q13885 | Tubulin beta-2A chain               | YVPR | 62  | treated | 1, 5 | N |
| 129 | 3 | 17.00 | 17    | 84.6 | HSCH <sub>2</sub> CH <sub>2</sub> CO- | 102 | (W)AKGHYTEGA E L V D S V L DV V R(K) | K:PITC | 794.3895 | 2381.126 | 0.0275  | 11.6  | 49907.3  | Q13885 | Tubulin beta-2A chain               | AGNN | 100 | treated | 1, 5 | N |
| 130 | 3 | 14.31 | 14.31 | 69.9 | HSCH <sub>2</sub> CH <sub>2</sub> CO- | 104 | (K)GHYTEGA E L V D S V L D VV R(K)   |        | 682.9989 | 2046.98  | 0.0021  | 1     | 49907.3  | Q13885 | Tubulin beta-2A chain               | NNWA | 102 | both    | 1, 5 | N |
| 131 | 3 | 17.36 | 17.36 | 90.8 | HSCH <sub>2</sub> CH <sub>2</sub> CO- | 105 | (G)H Y TEG A E L V D SV L D VV R(K)  |        | 663.995  | 1989.959 | 0.0118  | 5.9   | 49907.3  | Q13885 | Tubulin beta-2A chain               | NWAK | 103 | vehicle | 1, 5 | N |
| 132 | 3 | 12.86 | 12.86 | 69.9 | HSCH <sub>2</sub> CH <sub>2</sub> CO- | 106 | (H)YTEGAE L V D S V L D VV R(K)      |        | 618.3078 | 1852.9   | 0.0091  | 4.9   | 49907.3  | Q13885 | Tubulin beta-2A chain               | WAKG | 104 | treated | 1, 5 | N |
| 133 | 2 | 20.08 | 20.08 | 95.9 | HSCH <sub>2</sub> CH <sub>2</sub> CO- | 108 | (T)E G A E L V DSV L D V V R(K)      |        | 794.8973 | 1588.789 | -0.0014 | -0.9  | 49907.3  | Q13885 | Tubulin beta-2A chain               | KGHY | 106 | both    | 1, 5 | N |
| 134 | 3 | 13.50 | 13.5  | 77.3 | HSCH <sub>2</sub> CH <sub>2</sub> CO- | 800 | (R)AVTHTS PED V SF A E S R(R)        |        | 607.6113 | 1820.812 | 0.0074  | 4.1   | 132528.6 | Q9BTW9 | Tubulin-specific chaperone D        | LTGL | 798 | vehicle | N    | N |
| 135 | 3 | 10.65 | 10.65 | 66.8 | HSCH <sub>2</sub> CH <sub>2</sub> CO- | 64  | (K)ESTL H LV L R(L)                  |        | 385.8804 | 1155.619 | 0.0076  | 6.6   | 8564.9   | P62988 | Ubiquitin                           | YNIQ | 62  | vehicle | N    | N |
| 136 | 2 | 12.36 | 2.64  | 67.0 | HSCH <sub>2</sub> CH <sub>2</sub> CO- | 90  | (A)AS P L PEEPPV P R(P)              |        | 688.8522 | 1376.688 | 0.0093  | 6.7   | 35187.1  | A8MZF0 | Uncharacterized protein LOC728008   | TTVQ | 88  | both    | N    | N |
| 137 | 2 | 11.29 | 5.66  | 65.2 | HSCH <sub>2</sub> CH <sub>2</sub> CO- | 88  | (S)L A D A I N T E FK NT R(T)        | K:PITC | 858.4    | 1715.788 | 0.0047  | 2.8   | 53651.9  | P08670 | Vimentin                            | SVDF | 86  | treated | 1, 3 | Y |

- Mahrus S, *et al.* (2008) Global sequencing of proteolytic cleavage sites in apoptosis by specific labeling of protein N termini. *Cell* 134:866-876.
- Thiede B, Siejak F, Dimmler C, Jungblut PR, & Rudel T (2000) A two dimensional electrophoresis database of a human Jurkat T-cell line. *Electrophoresis* 21:2713-2720.
- Van Damme P, *et al.* (2005) Caspase-specific and nonspecific *in vivo* protein processing during Fas-induced apoptosis. *Nat Methods* 2:771-777.
- Thiede B & Rudel T (2004) Proteome analysis of apoptotic cells. *Mass Spectrom Rev* 23:333-349.
- Schmidt F, *et al.* (2007) Quantitative proteome analysis of cisplatin-induced apoptotic Jurkat T cells by stable isotope labeling with amino acids in cell culture, SDS-PAGE, and LC-MALDI-TOF/TOF MS. *Electrophoresis* 28:4359-4368.
- Thiede B, Treumann A, Kretschmer A, Sohlke J, & Rudel T (2005) Shotgun proteome analysis of protein cleavage in apoptotic cells. *Proteomics* 5:2123-2130.
- Thiede B, Kretschmer A, & Rudel T (2006) Quantitative proteome analysis of CD95 (Fas/Apo-1)-induced apoptosis by stable isotope labeling with amino acids in cell culture, 2-DE and MALDI-MS. *Proteomics* 6:614-622.
- Yuan X, *et al.* (2007) Nuclear protein profiling of Jurkat cells during heat stress-induced apoptosis by 2-DE and MS/MS. *Electrophoresis* 28:2018-2026.
- Short DM, *et al.* (2007) Apoptosis induced by staurosporine alters chaperone and endoplasmic reticulum proteins: Identification by quantitative proteomics. *Proteomics* 7:3085-3096.
